# Supplementary material for: Avian Influenza H7N9 Virus Adaptation to Human Hosts
Source: MDPI journal article supplement (doi:10.3390/v13050871), 2021-05-10
Supplement: s1 [file s1]

**Supplementary Table 1A | Avian influenza A (H7N9) virus dataset: host species, geographical location and year reported.**

| Host species             | Location         | Year | Before 2013 | After 2013 |
|--------------------------|------------------|------|-------------|------------|
| <i>Anas crecca</i>       | Spain            | 2008 | 12          | -          |
| <i>Blue-winged teal</i>  | USA              | 2006 | 12          | -          |
|                          | Guatemala        | 2008 | 24          | -          |
| <i>Chicken</i>           | China, Guangdong |      | -           | 12         |
|                          | China, Guangzhou |      | -           | 1          |
|                          | China, Jiangsu   | 2013 | -           | 50         |
|                          | China, Jiangxi   |      | -           | 12         |
|                          | China, Rizhao    |      | -           | 56         |
|                          | China, Shanghai  |      | -           | 143        |
|                          | China, Zhejiang  |      | -           | 51         |
|                          | China, Anhui     | 2013 | -           | 12         |
| <i>Duck</i>              | China, Gunma     | 2011 | 1           | -          |
|                          | China, Jiangxi   | 2009 | 132         | -          |
|                          | Mongolia         | 2008 | 4           | -          |
|                          |                  | 2010 | 1           | -          |
|                          | China, Zhejiang  | 2013 | -           | 12         |
| <i>Emperor goose</i>     | USA              | 2006 | 12          | -          |
| <i>Goose</i>             | Czech Republic   | 2009 | 24          | -          |
|                          | USA              | 2011 | 13          | -          |
| <i>Guinea fowl</i>       | USA              | 2011 | 14          | -          |
| <i>Homing pigeon</i>     | China, Jiangsu   | 2013 | -           | 12         |
| <i>Mallard</i>           | Albania          | 1999 | 1           | -          |
|                          | Spain            | 2005 | 1           | -          |
|                          | Sweden           | 2002 | 13          | -          |
| <i>Northern shoveler</i> | USA              | 2011 | 12          | -          |
| <i>Pigeon</i>            | China, Shanghai  | 2013 | -           | 36         |
| <i>Ruddy turnstone</i>   |                  | 2000 | 13          | -          |
|                          | USA              | 1995 | 12          | -          |
| <i>Spot billed duck</i>  | Korea            | 2011 | 11          | -          |
| <i>Tree sparrow</i>      | China, Shanghai  | 2013 | -           | 23         |
| <i>Turkey</i>            |                  | 1988 | 23          | -          |
|                          | USA              | 2009 | 69          | -          |
|                          |                  | 2011 | 21          | -          |
| <i>Wild bird</i>         | Korea            | 2011 | 33          | -          |
|                          |                  | 2008 | 12          | -          |
| <i>Wild duck</i>         | Korea            | 2010 | 48          | -          |
|                          |                  | 2011 | 72          | -          |
|                          | Mongolia         | 2008 | 9           | -          |
| <i>Wild pigeon</i>       | China, Jiangsu   | 2013 | -           | 12         |
| Subtotal                 |                  |      | 599         | 432        |
| Total                    |                  |      | 1031        |            |

**Supplementary Table 1B | Location of human influenza A (H7N9) virus protein sequences reported since the year 2013.**

| Location     | Since 2013 |
|--------------|------------|
| Changsha     | 24         |
| Fujian       | 12         |
| Guangdong    | 54         |
| Guangzhou    | 2          |
| Hangzhou     | 17         |
| Hong Kong    | 12         |
| Huizhou      | 12         |
| Jiangsu      | 36         |
| Nanchang     | 11         |
| Nanjing      | 60         |
| Shanghai     | 71         |
| Suzhou       | 24         |
| Taiwan       | 24         |
| Wuxi         | 48         |
| Xuzhou       | 12         |
| Zhejiang     | 48         |
| Zhenjiang    | 12         |
| <b>Total</b> | <b>479</b> |
