# Supplementary material for: Avian Influenza H7N9 Virus Adaptation to Human Hosts
Source: Viruses. 2021 May 10;13(5):871. doi: 10.3390/v13050871 (PMC8150935; doi:10.3390/v13050871)
Supplement: Supplementary file 1 [file viruses-13-00871-s001.zip]

Archive with 10 entries (10 files):
- SUPPLEMENTARY FIGURE 1.pdf
- SUPPLEMENTARY TABLE 1A&B.pdf
- SUPPLEMENTARY TABLE 2.xlsx
- SUPPLEMENTARY TABLE 3ABCD.xlsx
- SUPPLEMENTARY TABLE 4.xlsx
- SUPPLEMENTARY TABLE 5.xlsx
- SUPPLEMENTARY TABLE 6.docx
- SUPPLEMENTARY TABLE 7.xlsx
- SUPPLEMENTARY TABLE 8.xlsx
- SUPPLEMENTARY TABLE 9.csv
