# Supplementary material for: Avian Influenza H7N9 Virus Adaptation to Human Hosts
Source: Viruses. 2021 May 10;13(5):871. doi: 10.3390/v13050871 (PMC8150935; doi:10.3390/v13050871)
Supplement: Supplementary file 1 [file viruses-13-00871-s001.zip › SUPPLEMENTARY TABLE 2.xlsx]

## Sheet: Supplementary Table 2
Supplementary Table 2 | The diversity motifs of avian and human influenza A(H7N9) proteome nonamer positions.
Proteina	Positionb	Nonamer sequence (Avian & Human)c	Avian virus sequences																				Human virus sequences
			Number of sequencesd	Motif (incidence, %)e, f	Avian host source of isolation (%)e																		Number of sequencesd	Motif (incidence, %)e, f	Geographical area (%)e
					Chicken	Duck (domestic)	Wild duck	Pigeon	Tree sparrow	Eurasian teal	Wild pigeon	Mallard	Homing pigeon	Turkey	Blue-winged teal	Goose	Guinea fowl	Ruddy turnstone	Northern shoverl	Emperor goose	Wild bird	Spot-billed duck			China	Hong Kong	Taiwan
PB2	1 - 9	MERIKELRD	81	I (98)	31	16	14	4	2	1	1	1	1	10	2	4	1	2	1	-	4	1	37	I (92)	89	3	-
		....NQ...		U (1)	-	-	-	-	-	-	-	-	-	-	1	-	-	-	-	-	-	-		X (0)	-	-	-
		.......K.		U (1)	1	-	-	-	-	-	-	-	-	-	-	-	-	-	-	-	-	-		X (0)	-	-	-
		........Y		X (0)	-	-	-	-	-	-	-	-	-	-	-	-	-	-	-	-	-	-		Ma (5)	5	-	-
		...K.....		X (0)	-	-	-	-	-	-	-	-	-	-	-	-	-	-	-	-	-	-		U (3)	3	-	-
PB2	2 - 10	ERIKELRDL	82	I (98)	30	16	15	4	2	1	1	1	1	10	2	4	1	2	1	-	4	1	37	I (92)	89	3	-
		...NQ....		U (1)	-	-	-	-	-	-	-	-	-	-	1	-	-	-	-	-	-	-		X (0)	-	-	-
		......K..		U (1)	1	-	-	-	-	-	-	-	-	-	-	-	-	-	-	-	-	-		X (0)	-	-	-
		.......Y.		X (0)	-	-	-	-	-	-	-	-	-	-	-	-	-	-	-	-	-	-		Ma (5)	5	-	-
		..K......		X (0)	-	-	-	-	-	-	-	-	-	-	-	-	-	-	-	-	-	-		U (3)	3	-	-
PB2	3 - 11	RIKELRDLM	82	I (98)	30	16	15	4	2	1	1	1	1	10	2	4	1	2	1	-	4	1	37	I (92)	89	3	-
		..NQ.....		U (1)	-	-	-	-	-	-	-	-	-	-	1	-	-	-	-	-	-	-		X (0)	-	-	-
		.....K...		U (1)	1	-	-	-	-	-	-	-	-	-	-	-	-	-	-	-	-	-		X (0)	-	-	-
		......Y..		X (0)	-	-	-	-	-	-	-	-	-	-	-	-	-	-	-	-	-	-		Ma (5)	5	-	-
		.K.......		X (0)	-	-	-	-	-	-	-	-	-	-	-	-	-	-	-	-	-	-		U (3)	3	-	-
PB2	4 - 12	IKELRDLMS	82	I (98)	30	16	15	4	2	1	1	1	1	10	2	4	1	2	1	-	4	1	37	I (92)	89	3	-
		.NQ......		U (1)	-	-	-	-	-	-	-	-	-	-	1	-	-	-	-	-	-	-		X (0)	-	-	-
		....K....		U (1)	1	-	-	-	-	-	-	-	-	-	-	-	-	-	-	-	-	-		X (0)	-	-	-
		.....Y...		X (0)	-	-	-	-	-	-	-	-	-	-	-	-	-	-	-	-	-	-		Ma (5)	5	-	-
		K........		X (0)	-	-	-	-	-	-	-	-	-	-	-	-	-	-	-	-	-	-		U (3)	3	-	-
PB2	5 - 13	KELRDLMSQ	82	I (98)	30	16	15	4	2	1	1	1	1	10	2	4	1	2	1	-	4	1	39	I (95)	92	3	-
		NQ.......		U (1)	-	-	-	-	-	-	-	-	-	-	1	-	-	-	-	-	-	-		X (0)	-	-	-
		...K.....		U (1)	1	-	-	-	-	-	-	-	-	-	-	-	-	-	-	-	-	-		X (0)	-	-	-
		....Y....		X (0)	-	-	-	-	-	-	-	-	-	-	-	-	-	-	-	-	-	-		Ma (5)	5	-	-
PB2	6 - 14	ELRDLMSQS	82	I (98)	30	16	15	4	2	1	1	1	1	10	2	4	1	2	1	-	4	1	39	I (95)	92	3	-
		..K......		U (1)	1	-	-	-	-	-	-	-	-	-	-	-	-	-	-	-	-	-		X (0)	-	-	-
		Q........		U (1)	-	-	-	-	-	-	-	-	-	-	1	-	-	-	-	-	-	-		X (0)	-	-	-
		...Y.....		X (0)	-	-	-	-	-	-	-	-	-	-	-	-	-	-	-	-	-	-		Ma (5)	5	-	-
PB2	7 - 15	LRDLMSQSR	82	I (98)	30	16	15	4	2	1	1	1	1	10	4	4	1	2	1	-	2	1	41	I (95)	88	2	5
		........P		U (1)	-	-	-	-	-	-	-	-	-	-	-	-	-	-	-	-	1	-		X (0)	-	-	-
		.K.......		U (1)	1	-	-	-	-	-	-	-	-	-	-	-	-	-	-	-	-	-		X (0)	-	-	-
		..Y......		X (0)	-	-	-	-	-	-	-	-	-	-	-	-	-	-	-	-	-	-		Ma (5)	5	-	-
PB2	8 - 16	RDLMSQSRT	82	I (98)	30	16	15	4	2	1	1	1	1	10	4	4	1	2	1	-	2	1	41	I (95)	88	2	5
		K........		U (1)	1	-	-	-	-	-	-	-	-	-	-	-	-	-	-	-	-	-		X (0)	-	-	-
		.......P.		U (1)	-	-	-	-	-	-	-	-	-	-	-	-	-	-	-	-	1	-		X (0)	-	-	-
		.Y.......		X (0)	-	-	-	-	-	-	-	-	-	-	-	-	-	-	-	-	-	-		Ma (5)	5	-	-
PB2	9 - 17	DLMSQSRTR	82	I (99)	32	16	15	4	2	1	1	1	1	10	4	4	1	2	1	-	2	1	41	I (95)	88	2	5
		......P..		U (1)	-	-	-	-	-	-	-	-	-	-	-	-	-	-	-	-	1	-		X (0)	-	-	-
		Y........		X (0)	-	-	-	-	-	-	-	-	-	-	-	-	-	-	-	-	-	-		Ma (5)	5	-	-
PB2	10 - 18	LMSQSRTRE	82	I (99)	32	16	15	4	2	1	1	1	1	10	4	4	1	2	1	-	2	1	41	I (100)	93	2	5
		.....P...		U (1)	-	-	-	-	-	-	-	-	-	-	-	-	-	-	-	-	1	-		X (0)	-	-	-
PB2	11 - 19	MSQSRTREI	82	I (98)	32	16	15	4	2	1	1	1	1	10	4	4	1	1	1	-	2	1	41	I (100)	93	2	5
		....P....		U (1)	-	-	-	-	-	-	-	-	-	-	-	-	-	-	-	-	1	-		X (0)	-	-	-
		........T		U (1)	-	-	-	-	-	-	-	-	-	-	-	-	-	1	-	-	-	-		X (0)	-	-	-
PB2	12 - 20	SQSRTREIL	82	I (98)	32	16	15	4	2	1	1	1	1	10	4	4	1	1	1	-	2	1	41	I (100)	93	2	5
		.......T.		U (1)	-	-	-	-	-	-	-	-	-	-	-	-	-	1	-	-	-	-		X (0)	-	-	-
		...P.....		U (1)	-	-	-	-	-	-	-	-	-	-	-	-	-	-	-	-	1	-		X (0)	-	-	-
PB2	13 - 21	QSRTREILT	82	I (96)	30	16	15	4	2	1	1	1	1	10	4	4	1	1	1	-	2	1	41	I (100)	93	2	5
		......T..		U (1)	-	-	-	-	-	-	-	-	-	-	-	-	-	1	-	-	-	-		X (0)	-	-	-
		........A		U (1)	1	-	-	-	-	-	-	-	-	-	-	-	-	-	-	-	-	-		X (0)	-	-	-
		..P......		U (1)	-	-	-	-	-	-	-	-	-	-	-	-	-	-	-	-	1	-		X (0)	-	-	-
PB2	14 - 22	SRTREILTK	82	I (96)	30	16	15	4	2	1	1	1	1	10	4	4	1	1	1	-	2	1	40	I (100)	93	3	5
		.......A.		U (1)	1	-	-	-	-	-	-	-	-	-	-	-	-	-	-	-	-	-		X (0)	-	-	-
		.....T...		U (1)	-	-	-	-	-	-	-	-	-	-	-	-	-	1	-	-	-	-		X (0)	-	-	-
		.P.......		U (1)	-	-	-	-	-	-	-	-	-	-	-	-	-	-	-	-	1	-		X (0)	-	-	-
PB2	15 - 23	RTREILTKT	82	I (96)	30	16	15	4	2	1	1	1	1	10	4	4	1	1	1	-	2	1	40	I (100)	93	3	5
		....T....		U (1)	-	-	-	-	-	-	-	-	-	-	-	-	-	1	-	-	-	-		X (0)	-	-	-
		......A..		U (1)	1	-	-	-	-	-	-	-	-	-	-	-	-	-	-	-	-	-		X (0)	-	-	-
		P........		U (1)	-	-	-	-	-	-	-	-	-	-	-	-	-	-	-	-	1	-		X (0)	-	-	-
PB2	16 - 24	TREILTKTT	82	I (98)	30	16	15	4	2	1	1	1	1	10	4	4	1	1	1	-	4	1	40	I (100)	93	3	5
		...T.....		U (1)	-	-	-	-	-	-	-	-	-	-	-	-	-	1	-	-	-	-		X (0)	-	-	-
		.....A...		U (1)	1	-	-	-	-	-	-	-	-	-	-	-	-	-	-	-	-	-		X (0)	-	-	-
PB2	17 - 25	REILTKTTV	83	I (98)	30	16	14	4	2	1	1	1	1	10	4	4	1	1	1	1	4	1	40	I (100)	93	3	5
		....A....		U (1)	1	-	-	-	-	-	-	-	-	-	-	-	-	-	-	-	-	-		X (0)	-	-	-
		..T......		U (1)	-	-	-	-	-	-	-	-	-	-	-	-	-	1	-	-	-	-		X (0)	-	-	-
PB2	18 - 26	EILTKTTVD	83	I (98)	30	16	14	4	2	1	1	1	1	10	4	4	1	1	1	1	4	1	40	I (100)	93	3	5
		.T.......		U (1)	-	-	-	-	-	-	-	-	-	-	-	-	-	1	-	-	-	-		X (0)	-	-	-
		...A.....		U (1)	1	-	-	-	-	-	-	-	-	-	-	-	-	-	-	-	-	-		X (0)	-	-	-
PB2	19 - 27	ILTKTTVDH	83	I (98)	30	16	14	4	2	1	1	1	1	10	4	4	1	1	1	1	4	1	40	I (100)	93	3	5
		..A......		U (1)	1	-	-	-	-	-	-	-	-	-	-	-	-	-	-	-	-	-		X (0)	-	-	-
		T........		U (1)	-	-	-	-	-	-	-	-	-	-	-	-	-	1	-	-	-	-		X (0)	-	-	-
PB2	20 - 28	LTKTTVDHM	83	I (99)	30	16	14	4	2	1	1	1	1	10	4	4	1	2	1	1	4	1	40	I (100)	93	3	5
		.A.......		U (1)	1	-	-	-	-	-	-	-	-	-	-	-	-	-	-	-	-	-		X (0)	-	-	-
PB2	21 - 29	TKTTVDHMA	83	I (99)	30	16	14	4	2	1	1	1	1	10	4	4	1	2	1	1	4	1	40	I (100)	93	3	5
		A........		U (1)	1	-	-	-	-	-	-	-	-	-	-	-	-	-	-	-	-	-		X (0)	-	-	-
PB2	22 - 30	KTTVDHMAI	83	I (100)	31	16	14	4	2	1	1	1	1	10	4	4	1	2	1	1	4	1	40	I (100)	93	3	5
PB2	23 - 31	TTVDHMAII	83	I (100)	31	16	14	4	2	1	1	1	1	10	4	4	1	2	1	1	4	1	41	I (100)	93	2	5
PB2	24 - 32	TVDHMAIIK	83	I (100)	31	16	14	4	2	1	1	1	1	10	4	4	1	2	1	1	4	1	41	I (100)	93	2	5
PB2	25 - 33	VDHMAIIKK	83	I (100)	31	16	14	4	2	1	1	1	1	10	4	4	1	2	1	1	4	1	41	I (100)	93	2	5
PB2	26 - 34	DHMAIIKKY	83	I (100)	31	16	14	4	2	1	1	1	1	10	4	4	1	2	1	1	4	1	41	I (100)	93	2	5
PB2	27 - 35	HMAIIKKYT	83	I (100)	31	16	14	4	2	1	1	1	1	10	4	4	1	2	1	1	4	1	41	I (100)	93	2	5
PB2	28 - 36	MAIIKKYTS	83	I (100)	31	16	14	4	2	1	1	1	1	10	4	4	1	2	1	1	4	1	41	I (100)	93	2	5
PB2	29 - 37	AIIKKYTSG	83	I (100)	31	16	14	4	2	1	1	1	1	10	4	4	1	2	1	1	4	1	41	I (100)	93	2	5
PB2	30 - 38	IIKKYTSGR	83	I (100)	31	16	14	4	2	1	1	1	1	10	4	4	1	2	1	1	4	1	41	I (100)	93	2	5
PB2	31 - 39	IKKYTSGRQ	83	I (100)	31	16	14	4	2	1	1	1	1	10	4	4	1	2	1	1	4	1	41	I (100)	93	2	5
PB2	32 - 40	KKYTSGRQE	83	I (100)	31	16	14	4	2	1	1	1	1	10	4	4	1	2	1	1	4	1	41	I (100)	93	2	5
PB2	33 - 41	KYTSGRQEK	83	I (100)	31	16	14	4	2	1	1	1	1	10	4	4	1	2	1	1	4	1	40	I (100)	93	3	5
PB2	34 - 42	YTSGRQEKN	83	I (100)	31	16	14	4	2	1	1	1	1	10	4	4	1	2	1	1	4	1	40	I (100)	93	3	5
PB2	35 - 43	TSGRQEKNP	83	I (100)	31	16	14	4	2	1	1	1	1	10	4	4	1	2	1	1	4	1	40	I (100)	93	3	5
PB2	36 - 44	SGRQEKNPA	83	I (100)	31	16	14	4	2	1	1	1	1	10	4	4	1	2	1	1	4	1	40	I (100)	93	3	5
PB2	37 - 45	GRQEKNPAL	83	I (100)	31	16	14	4	2	1	1	1	1	10	4	4	1	2	1	1	4	1	40	I (100)	93	3	5
PB2	38 - 46	RQEKNPALR	83	I (100)	31	16	14	4	2	1	1	1	1	10	4	4	1	2	1	1	4	1	40	I (100)	93	3	5
PB2	39 - 47	QEKNPALRM	83	I (99)	31	16	14	4	2	1	1	1	1	10	4	4	1	2	1	1	2	1	40	I (100)	93	3	5
		........I		U (1)	-	-	-	-	-	-	-	-	-	-	-	-	-	-	-	-	1	-		X (0)	-	-	-
PB2	40 - 48	EKNPALRMK	83	I (99)	31	16	14	4	2	1	1	1	1	10	4	4	1	2	1	1	2	1	40	I (100)	93	3	5
		.......I.		U (1)	-	-	-	-	-	-	-	-	-	-	-	-	-	-	-	-	1	-		X (0)	-	-	-
PB2	41 - 49	KNPALRMKW	82	I (99)	32	16	15	4	2	1	1	1	1	10	4	4	1	2	1	-	2	1	40	I (100)	93	3	5
		......I..		U (1)	-	-	-	-	-	-	-	-	-	-	-	-	-	-	-	-	1	-		X (0)	-	-	-
PB2	42 - 50	NPALRMKWM	82	I (99)	32	16	15	4	2	1	1	1	1	10	4	4	1	2	1	-	2	1	40	I (100)	93	3	5
		.....I...		U (1)	-	-	-	-	-	-	-	-	-	-	-	-	-	-	-	-	1	-		X (0)	-	-	-
PB2	43 - 51	PALRMKWMM	82	I (99)	32	16	15	4	2	1	1	1	1	10	4	4	1	2	1	-	2	1	40	I (100)	93	3	5
		....I....		U (1)	-	-	-	-	-	-	-	-	-	-	-	-	-	-	-	-	1	-		X (0)	-	-	-
PB2	44 - 52	ALRMKWMMA	82	I (99)	32	16	15	4	2	1	1	1	1	10	4	4	1	2	1	-	2	1	40	I (100)	93	3	5
		...I.....		U (1)	-	-	-	-	-	-	-	-	-	-	-	-	-	-	-	-	1	-		X (0)	-	-	-
PB2	45 - 53	LRMKWMMAM	82	I (99)	32	16	15	4	2	1	1	1	1	10	4	4	1	2	1	-	2	1	40	I (100)	93	3	5
		..I......		U (1)	-	-	-	-	-	-	-	-	-	-	-	-	-	-	-	-	1	-		X (0)	-	-	-
PB2	46 - 54	RMKWMMAMK	82	I (99)	32	16	15	4	2	1	1	1	1	10	4	4	1	2	1	-	2	1	40	I (100)	93	3	5
		.I.......		U (1)	-	-	-	-	-	-	-	-	-	-	-	-	-	-	-	-	1	-		X (0)	-	-	-
PB2	47 - 55	MKWMMAMKY	82	I (99)	32	16	15	4	2	1	1	1	1	10	4	4	1	2	1	-	2	1	40	I (100)	93	3	5
		I........		U (1)	-	-	-	-	-	-	-	-	-	-	-	-	-	-	-	-	1	-		X (0)	-	-	-
PB2	48 - 56	KWMMAMKYP	82	I (100)	32	16	15	4	2	1	1	1	1	10	4	4	1	2	1	-	4	1	40	I (100)	93	3	5
PB2	49 - 57	WMMAMKYPI	82	I (100)	32	16	15	4	2	1	1	1	1	10	4	4	1	2	1	-	4	1	40	I (100)	93	3	5
PB2	50 - 58	MMAMKYPIT	83	I (100)	31	16	14	4	2	1	1	1	1	10	4	4	1	2	1	1	4	1	40	I (100)	93	3	5
PB2	51 - 59	MAMKYPITA	83	I (100)	31	16	14	4	2	1	1	1	1	10	4	4	1	2	1	1	4	1	40	I (100)	93	3	5
PB2	52 - 60	AMKYPITAD	83	I (99)	31	16	14	4	2	1	1	1	1	10	4	4	1	2	1	1	2	1	40	I (95)	88	3	5
		........N		U (1)	-	-	-	-	-	-	-	-	-	-	-	-	-	-	-	-	1	-		Ma (5)	5	-	-
PB2	53 - 61	MKYPITADK	83	I (99)	31	16	14	4	2	1	1	1	1	10	4	4	1	2	1	1	2	1	40	I (95)	88	3	5
		.......N.		U (1)	-	-	-	-	-	-	-	-	-	-	-	-	-	-	-	-	1	-		Ma (5)	5	-	-
PB2	54 - 62	KYPITADKR	83	I (99)	31	16	14	4	2	1	1	1	1	10	4	4	1	2	1	1	2	1	40	I (95)	88	3	5
		......N..		U (1)	-	-	-	-	-	-	-	-	-	-	-	-	-	-	-	-	1	-		Ma (5)	5	-	-
PB2	55 - 63	YPITADKRI	83	I (99)	31	16	14	4	2	1	1	1	1	10	4	4	1	2	1	1	2	1	40	I (95)	88	3	5
		.....N...		U (1)	-	-	-	-	-	-	-	-	-	-	-	-	-	-	-	-	1	-		Ma (5)	5	-	-
PB2	56 - 64	PITADKRIM	83	I (98)	31	16	14	4	2	-	1	1	1	10	4	4	1	2	1	1	2	1	41	I (95)	88	2	5
		........I		U (1)	-	-	-	-	-	1	-	-	-	-	-	-	-	-	-	-	-	-		X (0)	-	-	-
		....N....		U (1)	-	-	-	-	-	-	-	-	-	-	-	-	-	-	-	-	1	-		Ma (5)	5	-	-
PB2	57 - 65	ITADKRIME	83	I (98)	31	16	14	4	2	-	1	1	1	10	4	4	1	2	1	1	2	1	41	I (95)	88	2	5
		.......I.		U (1)	-	-	-	-	-	1	-	-	-	-	-	-	-	-	-	-	-	-		X (0)	-	-	-
		...N.....		U (1)	-	-	-	-	-	-	-	-	-	-	-	-	-	-	-	-	1	-		Ma (5)	5	-	-
PB2	58 - 66	TADKRIMEM	83	I (98)	31	16	14	4	2	-	1	1	1	10	4	4	1	2	1	1	2	1	41	I (95)	88	2	5
		..N......		U (1)	-	-	-	-	-	-	-	-	-	-	-	-	-	-	-	-	1	-		Ma (5)	5	-	-
		......I..		U (1)	-	-	-	-	-	1	-	-	-	-	-	-	-	-	-	-	-	-		X (0)	-	-	-
PB2	59 - 67	ADKRIMEMI	83	I (96)	31	16	14	4	2	-	1	1	1	8	4	4	1	2	1	1	2	1	41	I (95)	88	2	5
		........V		U (1)	-	-	-	-	-	-	-	-	-	1	-	-	-	-	-	-	-	-		X (0)	-	-	-
		.....I...		U (1)	-	-	-	-	-	1	-	-	-	-	-	-	-	-	-	-	-	-		X (0)	-	-	-
		.N.......		U (1)	-	-	-	-	-	-	-	-	-	-	-	-	-	-	-	-	1	-		Ma (5)	5	-	-
PB2	60 - 68	DKRIMEMIP	83	I (96)	31	16	14	4	2	-	1	1	1	8	4	4	1	2	1	1	2	1	41	I (95)	88	2	5
		.......V.		U (1)	-	-	-	-	-	-	-	-	-	1	-	-	-	-	-	-	-	-		X (0)	-	-	-
		....I....		U (1)	-	-	-	-	-	1	-	-	-	-	-	-	-	-	-	-	-	-		X (0)	-	-	-
		N........		U (1)	-	-	-	-	-	-	-	-	-	-	-	-	-	-	-	-	1	-		Ma (5)	5	-	-
PB2	61 - 69	KRIMEMIPE	83	I (98)	31	16	14	4	2	-	1	1	1	8	4	4	1	2	1	1	4	1	41	I (100)	93	2	5
		......V..		U (1)	-	-	-	-	-	-	-	-	-	1	-	-	-	-	-	-	-	-		X (0)	-	-	-
		...I.....		U (1)	-	-	-	-	-	1	-	-	-	-	-	-	-	-	-	-	-	-		X (0)	-	-	-
PB2	62 - 70	RIMEMIPER	83	I (98)	31	16	14	4	2	-	1	1	1	8	4	4	1	2	1	1	4	1	41	I (100)	93	2	5
		..I......		U (1)	-	-	-	-	-	1	-	-	-	-	-	-	-	-	-	-	-	-		X (0)	-	-	-
		.....V...		U (1)	-	-	-	-	-	-	-	-	-	1	-	-	-	-	-	-	-	-		X (0)	-	-	-
PB2	63 - 71	IMEMIPERN	83	I (98)	31	16	14	4	2	-	1	1	1	8	4	4	1	2	1	1	4	1	41	I (100)	93	2	5
		....V....		U (1)	-	-	-	-	-	-	-	-	-	1	-	-	-	-	-	-	-	-		X (0)	-	-	-
		.I.......		U (1)	-	-	-	-	-	1	-	-	-	-	-	-	-	-	-	-	-	-		X (0)	-	-	-
PB2	64 - 72	MEMIPERNE	83	I (98)	31	16	14	4	2	-	1	1	1	8	4	4	1	2	1	1	4	1	41	I (100)	93	2	5
		...V.....		U (1)	-	-	-	-	-	-	-	-	-	1	-	-	-	-	-	-	-	-		X (0)	-	-	-
		I........		U (1)	-	-	-	-	-	1	-	-	-	-	-	-	-	-	-	-	-	-		X (0)	-	-	-
PB2	65 - 73	EMIPERNEQ	83	I (99)	31	16	14	4	2	1	1	1	1	8	4	4	1	2	1	1	4	1	41	I (100)	93	2	5
		..V......		U (1)	-	-	-	-	-	-	-	-	-	1	-	-	-	-	-	-	-	-		X (0)	-	-	-
PB2	66 - 74	MIPERNEQG	83	I (99)	31	16	14	4	2	1	1	1	1	8	4	4	1	2	1	1	4	1	41	I (100)	93	2	5
		.V.......		U (1)	-	-	-	-	-	-	-	-	-	1	-	-	-	-	-	-	-	-		X (0)	-	-	-
PB2	67 - 75	IPERNEQGQ	83	I (99)	31	16	14	4	2	1	1	1	1	8	4	4	1	2	1	1	4	1	41	I (100)	93	2	5
		V........		U (1)	-	-	-	-	-	-	-	-	-	1	-	-	-	-	-	-	-	-		X (0)	-	-	-
PB2	68 - 76	PERNEQGQT	83	I (100)	31	16	14	4	2	1	1	1	1	10	4	4	1	2	1	1	4	1	41	I (100)	93	2	5
PB2	69 - 77	ERNEQGQTL	83	I (100)	31	16	14	4	2	1	1	1	1	10	4	4	1	2	1	1	4	1	41	I (100)	93	2	5
PB2	70 - 78	RNEQGQTLW	83	I (100)	31	16	14	4	2	1	1	1	1	10	4	4	1	2	1	1	4	1	41	I (100)	93	2	5
PB2	71 - 79	NEQGQTLWS	83	I (100)	31	16	14	4	2	1	1	1	1	10	4	4	1	2	1	1	4	1	41	I (100)	93	2	5
PB2	72 - 80	EQGQTLWSK	83	I (100)	31	16	14	4	2	1	1	1	1	10	4	4	1	2	1	1	4	1	41	I (100)	93	2	5
PB2	73 - 81	QGQTLWSKT	83	I (99)	31	16	14	4	2	1	1	1	1	10	4	4	1	2	1	1	2	1	41	I (100)	93	2	5
		........P		U (1)	-	-	-	-	-	-	-	-	-	-	-	-	-	-	-	-	1	-		X (0)	-	-	-
PB2	74 - 82	GQTLWSKTN	83	I (98)	31	16	13	4	2	1	1	1	1	10	4	4	1	2	1	1	2	1	41	I (100)	93	2	5
		.......P.		U (1)	-	-	-	-	-	-	-	-	-	-	-	-	-	-	-	-	1	-		X (0)	-	-	-
		........S		U (1)	-	-	1	-	-	-	-	-	-	-	-	-	-	-	-	-	-	-		X (0)	-	-	-
PB2	75 - 83	QTLWSKTND	83	I (98)	31	16	13	4	2	1	1	1	1	10	4	4	1	2	1	1	2	1	41	I (100)	93	2	5
		......P..		U (1)	-	-	-	-	-	-	-	-	-	-	-	-	-	-	-	-	1	-		X (0)	-	-	-
		.......S.		U (1)	-	-	1	-	-	-	-	-	-	-	-	-	-	-	-	-	-	-		X (0)	-	-	-
PB2	76 - 84	TLWSKTNDA	83	I (98)	31	16	13	4	2	1	1	1	1	10	4	4	1	2	1	1	2	1	41	I (100)	93	2	5
		......S..		U (1)	-	-	1	-	-	-	-	-	-	-	-	-	-	-	-	-	-	-		X (0)	-	-	-
		.....P...		U (1)	-	-	-	-	-	-	-	-	-	-	-	-	-	-	-	-	1	-		X (0)	-	-	-
PB2	77 - 85	LWSKTNDAG	83	I (98)	31	16	13	4	2	1	1	1	1	10	4	4	1	2	1	1	2	1	41	I (100)	93	2	5
		....P....		U (1)	-	-	-	-	-	-	-	-	-	-	-	-	-	-	-	-	1	-		X (0)	-	-	-
		.....S...		U (1)	-	-	1	-	-	-	-	-	-	-	-	-	-	-	-	-	-	-		X (0)	-	-	-
PB2	78 - 86	WSKTNDAGS	83	I (98)	31	16	13	4	2	1	1	1	1	10	4	4	1	2	1	1	2	1	41	I (100)	93	2	5
		....S....		U (1)	-	-	1	-	-	-	-	-	-	-	-	-	-	-	-	-	-	-		X (0)	-	-	-
		...P.....		U (1)	-	-	-	-	-	-	-	-	-	-	-	-	-	-	-	-	1	-		X (0)	-	-	-
PB2	79 - 87	SKTNDAGSD	83	I (98)	31	16	13	4	2	1	1	1	1	10	4	4	1	2	1	1	2	1	41	I (95)	88	2	5
		..P......		U (1)	-	-	-	-	-	-	-	-	-	-	-	-	-	-	-	-	1	-		X (0)	-	-	-
		...S.....		U (1)	-	-	1	-	-	-	-	-	-	-	-	-	-	-	-	-	-	-		X (0)	-	-	-
		........N		X (0)	-	-	-	-	-	-	-	-	-	-	-	-	-	-	-	-	-	-		Ma (5)	5	-	-
PB2	80 - 88	KTNDAGSDR	83	I (98)	31	16	13	4	2	1	1	1	1	10	4	4	1	2	1	1	2	1	41	I (95)	88	2	5
		.P.......		U (1)	-	-	-	-	-	-	-	-	-	-	-	-	-	-	-	-	1	-		X (0)	-	-	-
		..S......		U (1)	-	-	1	-	-	-	-	-	-	-	-	-	-	-	-	-	-	-		X (0)	-	-	-
		.......N.		X (0)	-	-	-	-	-	-	-	-	-	-	-	-	-	-	-	-	-	-		Ma (5)	5	-	-
PB2	81 - 89	TNDAGSDRV	83	I (98)	31	16	13	4	2	1	1	1	1	10	4	4	1	2	1	1	2	1	41	I (95)	88	2	5
		.S.......		U (1)	-	-	1	-	-	-	-	-	-	-	-	-	-	-	-	-	-	-		X (0)	-	-	-
		P........		U (1)	-	-	-	-	-	-	-	-	-	-	-	-	-	-	-	-	1	-		X (0)	-	-	-
		......N..		X (0)	-	-	-	-	-	-	-	-	-	-	-	-	-	-	-	-	-	-		Ma (5)	5	-	-
PB2	82 - 90	NDAGSDRVM	83	I (99)	31	16	13	4	2	1	1	1	1	10	4	4	1	2	1	1	4	1	41	I (95)	88	2	5
		S........		U (1)	-	-	1	-	-	-	-	-	-	-	-	-	-	-	-	-	-	-		X (0)	-	-	-
		.....N...		X (0)	-	-	-	-	-	-	-	-	-	-	-	-	-	-	-	-	-	-		Ma (5)	5	-	-
PB2	83 - 91	DAGSDRVMV	83	I (100)	31	16	14	4	2	1	1	1	1	10	4	4	1	2	1	1	4	1	41	I (95)	88	2	5
		....N....		X (0)	-	-	-	-	-	-	-	-	-	-	-	-	-	-	-	-	-	-		Ma (5)	5	-	-
PB2	84 - 92	AGSDRVMVS	83	I (100)	31	16	14	4	2	1	1	1	1	10	4	4	1	2	1	1	4	1	41	I (95)	88	2	5
		...N.....		X (0)	-	-	-	-	-	-	-	-	-	-	-	-	-	-	-	-	-	-		Ma (5)	5	-	-
PB2	85 - 93	GSDRVMVSP	83	I (100)	31	16	14	4	2	1	1	1	1	10	4	4	1	2	1	1	4	1	41	I (95)	88	2	5
		..N......		X (0)	-	-	-	-	-	-	-	-	-	-	-	-	-	-	-	-	-	-		Ma (5)	5	-	-
PB2	86 - 94	SDRVMVSPL	83	I (100)	31	16	14	4	2	1	1	1	1	10	4	4	1	2	1	1	4	1	41	I (95)	88	2	5
		.N.......		X (0)	-	-	-	-	-	-	-	-	-	-	-	-	-	-	-	-	-	-		Ma (5)	5	-	-
PB2	87 - 95	DRVMVSPLA	83	I (100)	31	16	14	4	2	1	1	1	1	10	4	4	1	2	1	1	4	1	41	I (95)	88	2	5
		N........		X (0)	-	-	-	-	-	-	-	-	-	-	-	-	-	-	-	-	-	-		Ma (5)	5	-	-
PB2	88 - 96	RVMVSPLAV	83	I (100)	31	16	14	4	2	1	1	1	1	10	4	4	1	2	1	1	4	1	41	I (100)	93	2	5
PB2	89 - 97	VMVSPLAVT	83	I (100)	31	16	14	4	2	1	1	1	1	10	4	4	1	2	1	1	4	1	41	I (100)	93	2	5
PB2	90 - 98	MVSPLAVTW	83	I (100)	31	16	14	4	2	1	1	1	1	10	4	4	1	2	1	1	4	1	41	I (100)	93	2	5
PB2	91 - 99	VSPLAVTWW	83	I (100)	31	16	14	4	2	1	1	1	1	10	4	4	1	2	1	1	4	1	41	I (100)	93	2	5
PB2	92 - 100	SPLAVTWWN	83	I (100)	31	16	14	4	2	1	1	1	1	10	4	4	1	2	1	1	4	1	41	I (100)	93	2	5
PB2	93 - 101	PLAVTWWNR	83	I (99)	31	16	14	4	2	1	1	1	1	10	4	4	1	2	1	1	2	1	41	I (100)	93	2	5
		........K		U (1)	-	-	-	-	-	-	-	-	-	-	-	-	-	-	-	-	1	-		X (0)	-	-	-
PB2	94 - 102	LAVTWWNRN	83	I (99)	31	16	14	4	2	1	1	1	1	10	4	4	1	2	1	1	2	1	41	I (100)	93	2	5
		.......K.		U (1)	-	-	-	-	-	-	-	-	-	-	-	-	-	-	-	-	1	-		X (0)	-	-	-
PB2	95 - 103	AVTWWNRNG	83	I (99)	31	16	14	4	2	1	1	1	1	10	4	4	1	2	1	1	2	1	41	I (100)	93	2	5
		......K..		U (1)	-	-	-	-	-	-	-	-	-	-	-	-	-	-	-	-	1	-		X (0)	-	-	-
PB2	96 - 104	VTWWNRNGP	83	I (99)	31	16	14	4	2	1	1	1	1	10	4	4	1	2	1	1	2	1	41	I (100)	93	2	5
		.....K...		U (1)	-	-	-	-	-	-	-	-	-	-	-	-	-	-	-	-	1	-		X (0)	-	-	-
PB2	97 - 105	TWWNRNGPT	83	I (98)	31	16	14	4	2	1	1	-	1	10	4	4	1	2	1	1	2	1	41	I (100)	93	2	5
		....K....		U (1)	-	-	-	-	-	-	-	-	-	-	-	-	-	-	-	-	1	-		X (0)	-	-	-
		........A		U (1)	-	-	-	-	-	-	-	1	-	-	-	-	-	-	-	-	-	-		X (0)	-	-	-
PB2	98 - 106	WWNRNGPTT	83	I (95)	30	16	14	4	2	1	1	-	1	10	4	4	1	2	1	-	2	1	41	I (100)	93	2	5
		........A		Ma (2)	1	-	-	-	-	-	-	-	-	-	-	-	-	-	-	1	-	-		X (0)	-	-	-
		...K.....		U (1)	-	-	-	-	-	-	-	-	-	-	-	-	-	-	-	-	1	-		X (0)	-	-	-
		.......A.		U (1)	-	-	-	-	-	-	-	1	-	-	-	-	-	-	-	-	-	-		X (0)	-	-	-
PB2	99 - 107	WNRNGPTTS	83	I (93)	30	16	14	4	2	1	1	-	1	7	4	4	1	2	1	-	2	1	41	I (100)	93	2	5
		.......A.		Ma (2)	1	-	-	-	-	-	-	-	-	-	-	-	-	-	-	1	-	-		X (0)	-	-	-
		........N		Mi (2)	-	-	-	-	-	-	-	-	-	2	-	-	-	-	-	-	-	-		X (0)	-	-	-
		..K......		U (1)	-	-	-	-	-	-	-	-	-	-	-	-	-	-	-	-	1	-		X (0)	-	-	-
		......A..		U (1)	-	-	-	-	-	-	-	1	-	-	-	-	-	-	-	-	-	-		X (0)	-	-	-
PB2	100 - 108	NRNGPTTST	83	I (87)	30	16	14	4	2	1	1	-	1	1	4	4	1	2	1	-	2	1	41	I (100)	93	2	5
		........A		Ma (6)	-	-	-	-	-	-	-	-	-	6	-	-	-	-	-	-	-	-		X (0)	-	-	-
		.......N.		Mi (2)	-	-	-	-	-	-	-	-	-	2	-	-	-	-	-	-	-	-		X (0)	-	-	-
		......A..		Mi (2)	1	-	-	-	-	-	-	-	-	-	-	-	-	-	-	1	-	-		X (0)	-	-	-
		.....A...		U (1)	-	-	-	-	-	-	-	1	-	-	-	-	-	-	-	-	-	-		X (0)	-	-	-
		.K.......		U (1)	-	-	-	-	-	-	-	-	-	-	-	-	-	-	-	-	1	-		X (0)	-	-	-
PB2	101 - 109	RNGPTTSTV	83	I (87)	30	16	14	4	2	1	1	-	1	1	4	4	1	2	1	-	2	1	41	I (100)	93	2	5
		.......A.		Ma (6)	-	-	-	-	-	-	-	-	-	6	-	-	-	-	-	-	-	-		X (0)	-	-	-
		......N..		Mi (2)	-	-	-	-	-	-	-	-	-	2	-	-	-	-	-	-	-	-		X (0)	-	-	-
		.....A...		Mi (2)	1	-	-	-	-	-	-	-	-	-	-	-	-	-	-	1	-	-		X (0)	-	-	-
		....A....		U (1)	-	-	-	-	-	-	-	1	-	-	-	-	-	-	-	-	-	-		X (0)	-	-	-
		K........		U (1)	-	-	-	-	-	-	-	-	-	-	-	-	-	-	-	-	1	-		X (0)	-	-	-
PB2	102 - 110	NGPTTSTVH	83	I (88)	30	16	14	4	2	1	1	-	1	1	4	4	1	2	1	-	4	1	41	I (100)	93	2	5
		......A..		Ma (6)	-	-	-	-	-	-	-	-	-	6	-	-	-	-	-	-	-	-		X (0)	-	-	-
		.....N...		Mi (2)	-	-	-	-	-	-	-	-	-	2	-	-	-	-	-	-	-	-		X (0)	-	-	-
		....A....		Mi (2)	1	-	-	-	-	-	-	-	-	-	-	-	-	-	-	1	-	-		X (0)	-	-	-
		...A.....		U (1)	-	-	-	-	-	-	-	1	-	-	-	-	-	-	-	-	-	-		X (0)	-	-	-
PB2	103 - 111	GPTTSTVHY	83	I (88)	30	16	14	4	2	1	1	-	1	1	4	4	1	2	1	-	4	1	41	I (100)	93	2	5
		.....A...		Ma (6)	-	-	-	-	-	-	-	-	-	6	-	-	-	-	-	-	-	-		X (0)	-	-	-
		....N....		Mi (2)	-	-	-	-	-	-	-	-	-	2	-	-	-	-	-	-	-	-		X (0)	-	-	-
		...A.....		Mi (2)	1	-	-	-	-	-	-	-	-	-	-	-	-	-	-	1	-	-		X (0)	-	-	-
		..A......		U (1)	-	-	-	-	-	-	-	1	-	-	-	-	-	-	-	-	-	-		X (0)	-	-	-
PB2	104 - 112	PTTSTVHYP	83	I (88)	30	16	14	4	2	1	1	-	1	1	4	4	1	2	1	-	4	1	41	I (100)	93	2	5
		....A....		Ma (6)	-	-	-	-	-	-	-	-	-	6	-	-	-	-	-	-	-	-		X (0)	-	-	-
		..A......		Mi (2)	1	-	-	-	-	-	-	-	-	-	-	-	-	-	-	1	-	-		X (0)	-	-	-
		...N.....		Mi (2)	-	-	-	-	-	-	-	-	-	2	-	-	-	-	-	-	-	-		X (0)	-	-	-
		.A.......		U (1)	-	-	-	-	-	-	-	1	-	-	-	-	-	-	-	-	-	-		X (0)	-	-	-
PB2	105 - 113	TTSTVHYPK	83	I (88)	30	16	14	4	2	1	1	-	1	1	4	4	1	2	1	-	4	1	41	I (100)	93	2	5
		...A.....		Ma (6)	-	-	-	-	-	-	-	-	-	6	-	-	-	-	-	-	-	-		X (0)	-	-	-
		..N......		Mi (2)	-	-	-	-	-	-	-	-	-	2	-	-	-	-	-	-	-	-		X (0)	-	-	-
		.A.......		Mi (2)	1	-	-	-	-	-	-	-	-	-	-	-	-	-	-	1	-	-		X (0)	-	-	-
		A........		U (1)	-	-	-	-	-	-	-	1	-	-	-	-	-	-	-	-	-	-		X (0)	-	-	-
PB2	106 - 114	TSTVHYPKV	83	I (89)	30	16	14	4	2	1	1	1	1	1	4	4	1	2	1	-	4	1	41	I (100)	93	2	5
		..A......		Ma (6)	-	-	-	-	-	-	-	-	-	6	-	-	-	-	-	-	-	-		X (0)	-	-	-
		A........		Mi (2)	1	-	-	-	-	-	-	-	-	-	-	-	-	-	-	1	-	-		X (0)	-	-	-
		.N.......		Mi (2)	-	-	-	-	-	-	-	-	-	2	-	-	-	-	-	-	-	-		X (0)	-	-	-
PB2	107 - 115	STVHYPKVY	83	I (92)	31	16	14	4	2	1	1	1	1	1	4	4	1	2	1	1	4	1	41	I (100)	93	2	5
		.A.......		Ma (6)	-	-	-	-	-	-	-	-	-	6	-	-	-	-	-	-	-	-		X (0)	-	-	-
		N........		Mi (2)	-	-	-	-	-	-	-	-	-	2	-	-	-	-	-	-	-	-		X (0)	-	-	-
PB2	108 - 116	TVHYPKVYK	83	I (94)	31	16	14	4	2	1	1	1	1	4	4	4	1	2	1	1	4	1	41	I (100)	93	2	5
		A........		Ma (6)	-	-	-	-	-	-	-	-	-	6	-	-	-	-	-	-	-	-		X (0)	-	-	-
PB2	109 - 117	VHYPKVYKT	83	I (98)	31	16	14	4	2	1	1	1	1	10	2	2	1	2	1	1	4	1	41	I (100)	93	2	5
		........I		U (1)	-	-	-	-	-	-	-	-	-	-	1	-	-	-	-	-	-	-		X (0)	-	-	-
		........P		U (1)	-	-	-	-	-	-	-	-	-	-	-	1	-	-	-	-	-	-		X (0)	-	-	-
PB2	110 - 118	HYPKVYKTY	83	I (98)	31	16	14	4	2	1	1	1	1	10	2	2	1	2	1	1	4	1	41	I (100)	93	2	5
		.......I.		U (1)	-	-	-	-	-	-	-	-	-	-	1	-	-	-	-	-	-	-		X (0)	-	-	-
		.......P.		U (1)	-	-	-	-	-	-	-	-	-	-	-	1	-	-	-	-	-	-		X (0)	-	-	-
PB2	111 - 119	YPKVYKTYF	83	I (98)	31	16	14	4	2	1	1	1	1	10	2	2	1	2	1	1	4	1	41	I (100)	93	2	5
		......P..		U (1)	-	-	-	-	-	-	-	-	-	-	-	1	-	-	-	-	-	-		X (0)	-	-	-
		......I..		U (1)	-	-	-	-	-	-	-	-	-	-	1	-	-	-	-	-	-	-		X (0)	-	-	-
PB2	112 - 120	PKVYKTYFE	83	I (98)	31	16	14	4	2	1	1	1	1	10	2	2	1	2	1	1	4	1	41	I (100)	93	2	5
		.....I...		U (1)	-	-	-	-	-	-	-	-	-	-	1	-	-	-	-	-	-	-		X (0)	-	-	-
		.....P...		U (1)	-	-	-	-	-	-	-	-	-	-	-	1	-	-	-	-	-	-		X (0)	-	-	-
PB2	113 - 121	KVYKTYFEK	83	I (98)	31	16	14	4	2	1	1	1	1	10	2	2	1	2	1	1	4	1	41	I (100)	93	2	5
		....P....		U (1)	-	-	-	-	-	-	-	-	-	-	-	1	-	-	-	-	-	-		X (0)	-	-	-
		....I....		U (1)	-	-	-	-	-	-	-	-	-	-	1	-	-	-	-	-	-	-		X (0)	-	-	-
PB2	114 - 122	VYKTYFEKV	83	I (98)	31	16	14	4	2	1	1	1	1	10	2	2	1	2	1	1	4	1	41	I (100)	93	2	5
		...I.....		U (1)	-	-	-	-	-	-	-	-	-	-	1	-	-	-	-	-	-	-		X (0)	-	-	-
		...P.....		U (1)	-	-	-	-	-	-	-	-	-	-	-	1	-	-	-	-	-	-		X (0)	-	-	-
PB2	115 - 123	YKTYFEKVE	83	I (98)	31	16	14	4	2	1	1	1	1	10	2	2	1	2	1	1	4	1	41	I (100)	93	2	5
		..I......		U (1)	-	-	-	-	-	-	-	-	-	-	1	-	-	-	-	-	-	-		X (0)	-	-	-
		..P......		U (1)	-	-	-	-	-	-	-	-	-	-	-	1	-	-	-	-	-	-		X (0)	-	-	-
PB2	116 - 124	KTYFEKVER	83	I (98)	31	16	14	4	2	1	1	1	1	10	2	2	1	2	1	1	4	1	41	I (100)	93	2	5
		.P.......		U (1)	-	-	-	-	-	-	-	-	-	-	-	1	-	-	-	-	-	-		X (0)	-	-	-
		.I.......		U (1)	-	-	-	-	-	-	-	-	-	-	1	-	-	-	-	-	-	-		X (0)	-	-	-
PB2	117 - 125	TYFEKVERL	83	I (98)	31	16	14	4	2	1	1	1	1	10	2	2	1	2	1	1	4	1	41	I (100)	93	2	5
		P........		U (1)	-	-	-	-	-	-	-	-	-	-	-	1	-	-	-	-	-	-		X (0)	-	-	-
		I........		U (1)	-	-	-	-	-	-	-	-	-	-	1	-	-	-	-	-	-	-		X (0)	-	-	-
PB2	118 - 126	YFEKVERLK	83	I (100)	31	16	14	4	2	1	1	1	1	10	4	4	1	2	1	1	4	1	41	I (100)	93	2	5
PB2	119 - 127	FEKVERLKH	83	I (100)	31	16	14	4	2	1	1	1	1	10	4	4	1	2	1	1	4	1	41	I (100)	93	2	5
PB2	120 - 128	EKVERLKHG	83	I (100)	31	16	14	4	2	1	1	1	1	10	4	4	1	2	1	1	4	1	41	I (100)	93	2	5
PB2	121 - 129	KVERLKHGT	83	I (100)	31	16	14	4	2	1	1	1	1	10	4	4	1	2	1	1	4	1	41	I (100)	93	2	5
PB2	122 - 130	VERLKHGTF	83	I (100)	31	16	14	4	2	1	1	1	1	10	4	4	1	2	1	1	4	1	41	I (100)	93	2	5
PB2	123 - 131	ERLKHGTFG	83	I (100)	31	16	14	4	2	1	1	1	1	10	4	4	1	2	1	1	4	1	41	I (100)	93	2	5
PB2	124 - 132	RLKHGTFGP	83	I (100)	31	16	14	4	2	1	1	1	1	10	4	4	1	2	1	1	4	1	41	I (100)	93	2	5
PB2	125 - 133	LKHGTFGPV	83	I (99)	31	16	14	4	2	1	1	1	1	10	4	4	1	2	1	-	4	1	41	I (100)	93	2	5
		........I		U (1)	-	-	-	-	-	-	-	-	-	-	-	-	-	-	-	1	-	-		X (0)	-	-	-
PB2	126 - 134	KHGTFGPVH	83	I (99)	31	16	14	4	2	1	1	1	1	10	4	4	1	2	1	-	4	1	41	I (100)	93	2	5
		.......I.		U (1)	-	-	-	-	-	-	-	-	-	-	-	-	-	-	-	1	-	-		X (0)	-	-	-
PB2	127 - 135	HGTFGPVHF	83	I (99)	31	16	14	4	2	1	1	1	1	10	4	4	1	2	1	-	4	1	41	I (100)	93	2	5
		......I..		U (1)	-	-	-	-	-	-	-	-	-	-	-	-	-	-	-	1	-	-		X (0)	-	-	-
PB2	128 - 136	GTFGPVHFR	83	I (99)	31	16	14	4	2	1	1	1	1	10	4	4	1	2	1	-	4	1	41	I (100)	93	2	5
		.....I...		U (1)	-	-	-	-	-	-	-	-	-	-	-	-	-	-	-	1	-	-		X (0)	-	-	-
PB2	129 - 137	TFGPVHFRN	83	I (99)	31	16	14	4	2	1	1	1	1	10	4	4	1	2	1	-	4	1	41	I (100)	93	2	5
		....I....		U (1)	-	-	-	-	-	-	-	-	-	-	-	-	-	-	-	1	-	-		X (0)	-	-	-
PB2	130 - 138	FGPVHFRNQ	83	I (99)	31	16	14	4	2	1	1	1	1	10	4	4	1	2	1	-	4	1	41	I (100)	93	2	5
		...I.....		U (1)	-	-	-	-	-	-	-	-	-	-	-	-	-	-	-	1	-	-		X (0)	-	-	-
PB2	131 - 139	GPVHFRNQV	83	I (99)	31	16	14	4	2	1	1	1	1	10	4	4	1	2	1	-	4	1	41	I (88)	83	-	5
		..I......		U (1)	-	-	-	-	-	-	-	-	-	-	-	-	-	-	-	1	-	-		X (0)	-	-	-
		........I		X (0)	-	-	-	-	-	-	-	-	-	-	-	-	-	-	-	-	-	-		Ma (12)	10	2	-
PB2	132 - 140	PVHFRNQVK	83	I (99)	31	16	14	4	2	1	1	1	1	10	4	4	1	2	1	-	4	1	41	I (88)	83	-	5
		.I.......		U (1)	-	-	-	-	-	-	-	-	-	-	-	-	-	-	-	1	-	-		X (0)	-	-	-
		.......I.		X (0)	-	-	-	-	-	-	-	-	-	-	-	-	-	-	-	-	-	-		Ma (12)	10	2	-
PB2	133 - 141	VHFRNQVKI	83	I (99)	31	16	14	4	2	1	1	1	1	10	4	4	1	2	1	-	4	1	41	I (88)	83	-	5
		I........		U (1)	-	-	-	-	-	-	-	-	-	-	-	-	-	-	-	1	-	-		X (0)	-	-	-
		......I..		X (0)	-	-	-	-	-	-	-	-	-	-	-	-	-	-	-	-	-	-		Ma (12)	10	2	-
PB2	134 - 142	HFRNQVKIR	83	I (100)	31	16	14	4	2	1	1	1	1	10	4	4	1	2	1	1	4	1	41	I (88)	83	-	5
		.....I...		X (0)	-	-	-	-	-	-	-	-	-	-	-	-	-	-	-	-	-	-		Ma (12)	10	2	-
PB2	135 - 143	FRNQVKIRR	83	I (100)	31	16	14	4	2	1	1	1	1	10	4	4	1	2	1	1	4	1	41	I (88)	83	-	5
		....I....		X (0)	-	-	-	-	-	-	-	-	-	-	-	-	-	-	-	-	-	-		Ma (12)	10	2	-
PB2	136 - 144	RNQVKIRRR	83	I (100)	31	16	14	4	2	1	1	1	1	10	4	4	1	2	1	1	4	1	41	I (88)	83	-	5
		...I.....		X (0)	-	-	-	-	-	-	-	-	-	-	-	-	-	-	-	-	-	-		Ma (12)	10	2	-
PB2	137 - 145	NQVKIRRRV	83	I (100)	31	16	14	4	2	1	1	1	1	10	4	4	1	2	1	1	4	1	41	I (88)	83	-	5
		..I......		X (0)	-	-	-	-	-	-	-	-	-	-	-	-	-	-	-	-	-	-		Ma (12)	10	2	-
PB2	138 - 146	QVKIRRRVD	83	I (100)	31	16	14	4	2	1	1	1	1	10	4	4	1	2	1	1	4	1	41	I (88)	83	-	5
		.I.......		X (0)	-	-	-	-	-	-	-	-	-	-	-	-	-	-	-	-	-	-		Ma (12)	10	2	-
PB2	139 - 147	VKIRRRVDI	83	I (100)	31	16	14	4	2	1	1	1	1	10	4	4	1	2	1	1	4	1	41	I (88)	83	-	5
		I........		X (0)	-	-	-	-	-	-	-	-	-	-	-	-	-	-	-	-	-	-		Ma (12)	10	2	-
PB2	140 - 148	KIRRRVDIN	83	I (100)	31	16	14	4	2	1	1	1	1	10	4	4	1	2	1	1	4	1	41	I (100)	93	2	5
PB2	141 - 149	IRRRVDINP	83	I (100)	31	16	14	4	2	1	1	1	1	10	4	4	1	2	1	1	4	1	41	I (100)	93	2	5
PB2	142 - 150	RRRVDINPG	83	I (100)	31	16	14	4	2	1	1	1	1	10	4	4	1	2	1	1	4	1	41	I (100)	93	2	5
PB2	143 - 151	RRVDINPGH	83	I (100)	31	16	14	4	2	1	1	1	1	10	4	4	1	2	1	1	4	1	41	I (100)	93	2	5
PB2	144 - 152	RVDINPGHA	83	I (100)	31	16	14	4	2	1	1	1	1	10	4	4	1	2	1	1	4	1	41	I (100)	93	2	5
PB2	145 - 153	VDINPGHAD	83	I (100)	31	16	14	4	2	1	1	1	1	10	4	4	1	2	1	1	4	1	41	I (100)	93	2	5
PB2	146 - 154	DINPGHADL	83	I (100)	31	16	14	4	2	1	1	1	1	10	4	4	1	2	1	1	4	1	41	I (100)	93	2	5
PB2	147 - 155	INPGHADLS	83	I (99)	31	16	14	4	2	1	1	1	1	10	4	4	1	2	1	1	2	1	41	I (100)	93	2	5
		........N		U (1)	-	-	-	-	-	-	-	-	-	-	-	-	-	-	-	-	1	-		X (0)	-	-	-
PB2	148 - 156	NPGHADLSA	83	I (99)	31	16	14	4	2	1	1	1	1	10	4	4	1	2	1	1	2	1	41	I (100)	93	2	5
		.......N.		U (1)	-	-	-	-	-	-	-	-	-	-	-	-	-	-	-	-	1	-		X (0)	-	-	-
PB2	149 - 157	PGHADLSAK	83	I (99)	31	16	14	4	2	1	1	1	1	10	4	4	1	2	1	1	2	1	41	I (100)	93	2	5
		......N..		U (1)	-	-	-	-	-	-	-	-	-	-	-	-	-	-	-	-	1	-		X (0)	-	-	-
PB2	150 - 158	GHADLSAKE	83	I (99)	31	16	14	4	2	1	1	1	1	10	4	4	1	2	1	1	2	1	41	I (100)	93	2	5
		.....N...		U (1)	-	-	-	-	-	-	-	-	-	-	-	-	-	-	-	-	1	-		X (0)	-	-	-
PB2	151 - 159	HADLSAKEA	83	I (99)	31	16	14	4	2	1	1	1	1	10	4	4	1	2	1	1	2	1	41	I (100)	93	2	5
		....N....		U (1)	-	-	-	-	-	-	-	-	-	-	-	-	-	-	-	-	1	-		X (0)	-	-	-
PB2	152 - 160	ADLSAKEAQ	83	I (99)	31	16	14	4	2	1	1	1	1	10	4	4	1	2	1	1	2	1	41	I (100)	93	2	5
		...N.....		U (1)	-	-	-	-	-	-	-	-	-	-	-	-	-	-	-	-	1	-		X (0)	-	-	-
PB2	153 - 161	DLSAKEAQD	83	I (99)	31	16	14	4	2	1	1	1	1	10	4	4	1	2	1	1	2	1	41	I (100)	93	2	5
		..N......		U (1)	-	-	-	-	-	-	-	-	-	-	-	-	-	-	-	-	1	-		X (0)	-	-	-
PB2	154 - 162	LSAKEAQDV	83	I (99)	31	16	14	4	2	1	1	1	1	10	4	4	1	2	1	1	2	1	41	I (100)	93	2	5
		.N.......		U (1)	-	-	-	-	-	-	-	-	-	-	-	-	-	-	-	-	1	-		X (0)	-	-	-
PB2	155 - 163	SAKEAQDVI	83	I (99)	31	16	14	4	2	1	1	1	1	10	4	4	1	2	1	1	2	1	41	I (100)	93	2	5
		N........		U (1)	-	-	-	-	-	-	-	-	-	-	-	-	-	-	-	-	1	-		X (0)	-	-	-
PB2	156 - 164	AKEAQDVIM	83	I (100)	31	16	14	4	2	1	1	1	1	10	4	4	1	2	1	1	4	1	41	I (100)	93	2	5
PB2	157 - 165	KEAQDVIME	83	I (100)	31	16	14	4	2	1	1	1	1	10	4	4	1	2	1	1	4	1	41	I (100)	93	2	5
PB2	158 - 166	EAQDVIMEV	83	I (100)	31	16	14	4	2	1	1	1	1	10	4	4	1	2	1	1	4	1	41	I (100)	93	2	5
PB2	159 - 167	AQDVIMEVV	83	I (100)	31	16	14	4	2	1	1	1	1	10	4	4	1	2	1	1	4	1	41	I (100)	93	2	5
PB2	160 - 168	QDVIMEVVF	83	I (98)	31	16	12	4	2	1	1	1	1	10	4	4	1	2	1	1	4	1	41	I (100)	93	2	5
		........Y		Ma (2)	-	-	2	-	-	-	-	-	-	-	-	-	-	-	-	-	-	-		X (0)	-	-	-
PB2	161 - 169	DVIMEVVFP	83	I (98)	31	16	12	4	2	1	1	1	1	10	4	4	1	2	1	1	4	1	41	I (100)	93	2	5
		.......Y.		Ma (2)	-	-	2	-	-	-	-	-	-	-	-	-	-	-	-	-	-	-		X (0)	-	-	-
PB2	162 - 170	VIMEVVFPN	83	I (98)	31	16	12	4	2	1	1	1	1	10	4	4	1	2	1	1	4	1	41	I (100)	93	2	5
		......Y..		Ma (2)	-	-	2	-	-	-	-	-	-	-	-	-	-	-	-	-	-	-		X (0)	-	-	-
PB2	163 - 171	IMEVVFPNE	83	I (98)	31	16	12	4	2	1	1	1	1	10	4	4	1	2	1	1	4	1	41	I (100)	93	2	5
		.....Y...		Ma (2)	-	-	2	-	-	-	-	-	-	-	-	-	-	-	-	-	-	-		X (0)	-	-	-
PB2	164 - 172	MEVVFPNEV	83	I (98)	31	16	12	4	2	1	1	1	1	10	4	4	1	2	1	1	4	1	41	I (100)	93	2	5
		....Y....		Ma (2)	-	-	2	-	-	-	-	-	-	-	-	-	-	-	-	-	-	-		X (0)	-	-	-
PB2	165 - 173	EVVFPNEVG	83	I (98)	31	16	12	4	2	1	1	1	1	10	4	4	1	2	1	1	4	1	41	I (100)	93	2	5
		...Y.....		Ma (2)	-	-	2	-	-	-	-	-	-	-	-	-	-	-	-	-	-	-		X (0)	-	-	-
PB2	166 - 174	VVFPNEVGA	83	I (98)	31	16	12	4	2	1	1	1	1	10	4	4	1	2	1	1	4	1	41	I (100)	93	2	5
		..Y......		Ma (2)	-	-	2	-	-	-	-	-	-	-	-	-	-	-	-	-	-	-		X (0)	-	-	-
PB2	167 - 175	VFPNEVGAR	83	I (98)	31	16	12	4	2	1	1	1	1	10	4	4	1	2	1	1	4	1	41	I (100)	93	2	5
		.Y.......		Ma (2)	-	-	2	-	-	-	-	-	-	-	-	-	-	-	-	-	-	-		X (0)	-	-	-
PB2	168 - 176	FPNEVGARI	83	I (98)	31	16	12	4	2	1	1	1	1	10	4	4	1	2	1	1	4	1	41	I (100)	93	2	5
		Y........		Ma (2)	-	-	2	-	-	-	-	-	-	-	-	-	-	-	-	-	-	-		X (0)	-	-	-
PB2	169 - 177	PNEVGARIL	83	I (100)	31	16	14	4	2	1	1	1	1	10	4	4	1	2	1	1	4	1	41	I (100)	93	2	5
PB2	170 - 178	NEVGARILT	83	I (100)	31	16	14	4	2	1	1	1	1	10	4	4	1	2	1	1	4	1	41	I (100)	93	2	5
PB2	171 - 179	EVGARILTS	83	I (100)	31	16	14	4	2	1	1	1	1	10	4	4	1	2	1	1	4	1	41	I (100)	93	2	5
PB2	172 - 180	VGARILTSE	83	I (100)	31	16	14	4	2	1	1	1	1	10	4	4	1	2	1	1	4	1	41	I (100)	93	2	5
PB2	173 - 181	GARILTSES	83	I (100)	31	16	14	4	2	1	1	1	1	10	4	4	1	2	1	1	4	1	41	I (98)	90	2	5
		........P		X (0)	-	-	-	-	-	-	-	-	-	-	-	-	-	-	-	-	-	-		U (2)	2	-	-
PB2	174 - 182	ARILTSESQ	83	I (100)	31	16	14	4	2	1	1	1	1	10	4	4	1	2	1	1	4	1	41	I (98)	90	2	5
		.......P.		X (0)	-	-	-	-	-	-	-	-	-	-	-	-	-	-	-	-	-	-		U (2)	2	-	-
PB2	175 - 183	RILTSESQL	83	I (100)	31	16	14	4	2	1	1	1	1	10	4	4	1	2	1	1	4	1	41	I (98)	90	2	5
		......P..		X (0)	-	-	-	-	-	-	-	-	-	-	-	-	-	-	-	-	-	-		U (2)	2	-	-
PB2	176 - 184	ILTSESQLT	83	I (98)	31	16	14	4	2	1	1	1	1	7	4	4	1	2	1	1	4	1	41	I (98)	90	2	5
		........A		Ma (2)	-	-	-	-	-	-	-	-	-	2	-	-	-	-	-	-	-	-		X (0)	-	-	-
		.....P...		X (0)	-	-	-	-	-	-	-	-	-	-	-	-	-	-	-	-	-	-		U (2)	2	-	-
PB2	177 - 185	LTSESQLTI	83	I (98)	31	16	14	4	2	1	1	1	1	7	4	4	1	2	1	1	4	1	41	I (98)	90	2	5
		.......A.		Ma (2)	-	-	-	-	-	-	-	-	-	2	-	-	-	-	-	-	-	-		X (0)	-	-	-
		....P....		X (0)	-	-	-	-	-	-	-	-	-	-	-	-	-	-	-	-	-	-		U (2)	2	-	-
PB2	178 - 186	TSESQLTIT	83	I (98)	31	16	14	4	2	1	1	1	1	7	4	4	1	2	1	1	4	1	41	I (98)	90	2	5
		......A..		Ma (2)	-	-	-	-	-	-	-	-	-	2	-	-	-	-	-	-	-	-		X (0)	-	-	-
		...P.....		X (0)	-	-	-	-	-	-	-	-	-	-	-	-	-	-	-	-	-	-		U (2)	2	-	-
PB2	179 - 187	SESQLTITK	83	I (96)	31	16	14	4	2	1	1	1	1	7	4	4	1	2	1	-	4	1	41	I (98)	90	2	5
		.....A...		Ma (2)	-	-	-	-	-	-	-	-	-	2	-	-	-	-	-	-	-	-		X (0)	-	-	-
		........R		U (1)	-	-	-	-	-	-	-	-	-	-	-	-	-	-	-	1	-	-		X (0)	-	-	-
		..P......		X (0)	-	-	-	-	-	-	-	-	-	-	-	-	-	-	-	-	-	-		U (2)	2	-	-
PB2	180 - 188	ESQLTITKE	83	I (96)	31	16	14	4	2	1	1	1	1	7	4	4	1	2	1	-	4	1	41	I (98)	90	2	5
		....A....		Ma (2)	-	-	-	-	-	-	-	-	-	2	-	-	-	-	-	-	-	-		X (0)	-	-	-
		.......R.		U (1)	-	-	-	-	-	-	-	-	-	-	-	-	-	-	-	1	-	-		X (0)	-	-	-
		.P.......		X (0)	-	-	-	-	-	-	-	-	-	-	-	-	-	-	-	-	-	-		U (2)	2	-	-
PB2	181 - 189	SQLTITKEK	83	I (96)	31	16	14	4	2	1	1	1	1	7	4	4	1	2	1	-	4	1	41	I (98)	90	2	5
		...A.....		Ma (2)	-	-	-	-	-	-	-	-	-	2	-	-	-	-	-	-	-	-		X (0)	-	-	-
		......R..		U (1)	-	-	-	-	-	-	-	-	-	-	-	-	-	-	-	1	-	-		X (0)	-	-	-
		P........		X (0)	-	-	-	-	-	-	-	-	-	-	-	-	-	-	-	-	-	-		U (2)	2	-	-
PB2	182 - 190	QLTITKEKK	83	I (96)	31	16	14	4	2	1	1	1	1	7	4	4	1	2	1	-	4	1	41	I (100)	93	2	5
		..A......		Ma (2)	-	-	-	-	-	-	-	-	-	2	-	-	-	-	-	-	-	-		X (0)	-	-	-
		.....R...		U (1)	-	-	-	-	-	-	-	-	-	-	-	-	-	-	-	1	-	-		X (0)	-	-	-
PB2	183 - 191	LTITKEKKE	83	I (59)	5	13	14	-	-	1	-	1	-	7	4	4	1	2	1	-	4	1	41	Ma (12)	10	2	-
		........K		Ma (36)	25	2	-	4	2	-	1	-	1	-	-	-	-	-	-	-	-	-		I (88)	83	-	5
		.A.......		Mi (2)	-	-	-	-	-	-	-	-	-	2	-	-	-	-	-	-	-	-		X (0)	-	-	-
		....R....		U (1)	-	-	-	-	-	-	-	-	-	-	-	-	-	-	-	1	-	-		X (0)	-	-	-
		........T		U (1)	1	-	-	-	-	-	-	-	-	-	-	-	-	-	-	-	-	-		X (0)	-	-	-
PB2	184 - 192	TITKEKKEE	83	I (59)	5	13	14	-	-	1	-	1	-	7	4	4	1	2	1	-	4	1	41	Ma (12)	10	2	-
		.......K.		Ma (36)	25	2	-	4	2	-	1	-	1	-	-	-	-	-	-	-	-	-		I (88)	83	-	5
		A........		Mi (2)	-	-	-	-	-	-	-	-	-	2	-	-	-	-	-	-	-	-		X (0)	-	-	-
		...R.....		U (1)	-	-	-	-	-	-	-	-	-	-	-	-	-	-	-	1	-	-		X (0)	-	-	-
		.......T.		U (1)	1	-	-	-	-	-	-	-	-	-	-	-	-	-	-	-	-	-		X (0)	-	-	-
PB2	185 - 193	ITKEKKEEL	83	I (62)	5	13	14	-	-	1	-	1	-	10	4	4	1	2	1	-	4	1	41	Ma (12)	10	2	-
		......K..		Ma (36)	25	2	-	4	2	-	1	-	1	-	-	-	-	-	-	-	-	-		I (88)	83	-	5
		......T..		U (1)	1	-	-	-	-	-	-	-	-	-	-	-	-	-	-	-	-	-		X (0)	-	-	-
		..R......		U (1)	-	-	-	-	-	-	-	-	-	-	-	-	-	-	-	1	-	-		X (0)	-	-	-
PB2	186 - 194	TKEKKEELQ	83	I (62)	5	13	14	-	-	1	-	1	-	10	4	4	1	2	1	-	4	1	41	Ma (12)	10	2	-
		.....K...		Ma (36)	25	2	-	4	2	-	1	-	1	-	-	-	-	-	-	-	-	-		I (88)	83	-	5
		.R.......		U (1)	-	-	-	-	-	-	-	-	-	-	-	-	-	-	-	1	-	-		X (0)	-	-	-
		.....T...		U (1)	1	-	-	-	-	-	-	-	-	-	-	-	-	-	-	-	-	-		X (0)	-	-	-
PB2	187 - 195	KEKKEELQD	83	I (55)	5	13	10	-	-	1	-	1	-	10	4	4	1	2	1	-	4	-	41	Ma (12)	10	2	-
		....K....		Ma (36)	25	2	-	4	2	-	1	-	1	-	-	-	-	-	-	-	-	-		I (85)	81	-	5
		........E		Mi (6)	-	-	5	-	-	-	-	-	-	-	-	-	-	-	-	-	-	1		X (0)	-	-	-
		....T....		U (1)	1	-	-	-	-	-	-	-	-	-	-	-	-	-	-	-	-	-		X (0)	-	-	-
		R........		U (1)	-	-	-	-	-	-	-	-	-	-	-	-	-	-	-	1	-	-		X (0)	-	-	-
		....K...E		X (0)	-	-	-	-	-	-	-	-	-	-	-	-	-	-	-	-	-	-		U (2)	2	-	-
PB2	188 - 196	EKKEELQDC	83	I (57)	5	13	10	-	-	1	-	1	-	10	4	4	1	2	1	1	4	-	41	Ma (12)	10	2	-
		...K.....		Ma (36)	25	2	-	4	2	-	1	-	1	-	-	-	-	-	-	-	-	-		I (85)	81	-	5
		.......E.		Mi (6)	-	-	5	-	-	-	-	-	-	-	-	-	-	-	-	-	-	1		X (0)	-	-	-
		...T.....		U (1)	1	-	-	-	-	-	-	-	-	-	-	-	-	-	-	-	-	-		X (0)	-	-	-
		...K...E.		X (0)	-	-	-	-	-	-	-	-	-	-	-	-	-	-	-	-	-	-		U (2)	2	-	-
PB2	189 - 197	KKEELQDCK	83	I (54)	5	13	10	-	-	1	-	1	-	10	4	1	1	2	1	1	4	-	41	Ma (12)	10	2	-
		..K......		Ma (29)	19	2	-	2	2	-	1	-	1	-	-	-	-	-	-	-	-	-		I (81)	76	-	5
		..K.....R		Mi (7)	6	-	-	1	-	-	-	-	-	-	-	-	-	-	-	-	-	-		Mi (5)	5	-	-
		......E..		Mi (6)	-	-	5	-	-	-	-	-	-	-	-	-	-	-	-	-	-	1		X (0)	-	-	-
		........R		Mi (2)	-	-	-	-	-	-	-	-	-	-	-	2	-	-	-	-	-	-		X (0)	-	-	-
		..T......		U (1)	1	-	-	-	-	-	-	-	-	-	-	-	-	-	-	-	-	-		X (0)	-	-	-
		..K...E.R		X (0)	-	-	-	-	-	-	-	-	-	-	-	-	-	-	-	-	-	-		U (2)	2	-	-
PB2	190 - 198	KEELQDCKI	83	I (54)	5	13	10	-	-	1	-	1	-	10	4	1	1	2	1	1	4	-	41	Ma (12)	10	2	-
		.K.......		Ma (29)	19	2	-	2	2	-	1	-	1	-	-	-	-	-	-	-	-	-		I (81)	76	-	5
		.K.....R.		Mi (7)	6	-	-	1	-	-	-	-	-	-	-	-	-	-	-	-	-	-		Mi (5)	5	-	-
		.....E...		Mi (6)	-	-	5	-	-	-	-	-	-	-	-	-	-	-	-	-	-	1		X (0)	-	-	-
		.......R.		Mi (2)	-	-	-	-	-	-	-	-	-	-	-	2	-	-	-	-	-	-		X (0)	-	-	-
		.T.......		U (1)	1	-	-	-	-	-	-	-	-	-	-	-	-	-	-	-	-	-		X (0)	-	-	-
		.K...E.R.		X (0)	-	-	-	-	-	-	-	-	-	-	-	-	-	-	-	-	-	-		U (2)	2	-	-
PB2	191 - 199	EELQDCKIA	83	I (52)	5	13	10	-	-	1	-	1	-	7	4	1	1	2	1	1	4	-	41	Ma (12)	10	2	-
		K........		Ma (29)	19	2	-	2	2	-	1	-	1	-	-	-	-	-	-	-	-	-		I (81)	76	-	5
		K.....R..		Mi (7)	6	-	-	1	-	-	-	-	-	-	-	-	-	-	-	-	-	-		Mi (5)	5	-	-
		....E....		Mi (6)	-	-	5	-	-	-	-	-	-	-	-	-	-	-	-	-	-	1		X (0)	-	-	-
		......R..		Mi (2)	-	-	-	-	-	-	-	-	-	-	-	2	-	-	-	-	-	-		X (0)	-	-	-
		........T		Mi (2)	-	-	-	-	-	-	-	-	-	2	-	-	-	-	-	-	-	-		X (0)	-	-	-
		T........		U (1)	1	-	-	-	-	-	-	-	-	-	-	-	-	-	-	-	-	-		X (0)	-	-	-
		K...E.R..		X (0)	-	-	-	-	-	-	-	-	-	-	-	-	-	-	-	-	-	-		U (2)	2	-	-
PB2	192 - 200	ELQDCKIAP	83	I (81)	25	16	10	2	2	1	1	1	1	6	4	1	1	2	1	1	4	-	41	I (93)	85	2	5
		.....R...		Ma (10)	6	-	-	1	-	-	-	-	-	-	-	2	-	-	-	-	-	-		Ma (5)	5	-	-
		...E.....		Mi (6)	-	-	5	-	-	-	-	-	-	-	-	-	-	-	-	-	-	1		X (0)	-	-	-
		.......T.		Mi (2)	-	-	-	-	-	-	-	-	-	2	-	-	-	-	-	-	-	-		X (0)	-	-	-
		........H		U (1)	-	-	-	-	-	-	-	-	-	1	-	-	-	-	-	-	-	-		X (0)	-	-	-
		...E.R...		X (0)	-	-	-	-	-	-	-	-	-	-	-	-	-	-	-	-	-	-		U (2)	2	-	-
PB2	193 - 201	LQDCKIAPL	83	I (81)	25	16	10	2	2	1	1	1	1	6	4	1	1	2	1	1	4	-	41	I (93)	85	2	5
		....R....		Ma (10)	6	-	-	1	-	-	-	-	-	-	-	2	-	-	-	-	-	-		Ma (5)	5	-	-
		..E......		Mi (6)	-	-	5	-	-	-	-	-	-	-	-	-	-	-	-	-	-	1		X (0)	-	-	-
		......T..		Mi (2)	-	-	-	-	-	-	-	-	-	2	-	-	-	-	-	-	-	-		X (0)	-	-	-
		.......H.		U (1)	-	-	-	-	-	-	-	-	-	1	-	-	-	-	-	-	-	-		X (0)	-	-	-
		..E.R....		X (0)	-	-	-	-	-	-	-	-	-	-	-	-	-	-	-	-	-	-		U (2)	2	-	-
PB2	194 - 202	QDCKIAPLM	83	I (81)	25	16	10	2	2	1	1	1	1	6	4	1	1	2	1	1	4	-	41	I (93)	85	2	5
		...R.....		Ma (10)	6	-	-	1	-	-	-	-	-	-	-	2	-	-	-	-	-	-		Ma (5)	5	-	-
		.E.......		Mi (6)	-	-	5	-	-	-	-	-	-	-	-	-	-	-	-	-	-	1		X (0)	-	-	-
		.....T...		Mi (2)	-	-	-	-	-	-	-	-	-	2	-	-	-	-	-	-	-	-		X (0)	-	-	-
		......H..		U (1)	-	-	-	-	-	-	-	-	-	1	-	-	-	-	-	-	-	-		X (0)	-	-	-
		.E.R.....		X (0)	-	-	-	-	-	-	-	-	-	-	-	-	-	-	-	-	-	-		U (2)	2	-	-
PB2	195 - 203	DCKIAPLMV	83	I (80)	24	16	10	2	2	1	1	1	1	6	4	1	1	2	1	1	4	-	41	I (93)	85	2	5
		..R......		Ma (10)	6	-	-	1	-	-	-	-	-	-	-	2	-	-	-	-	-	-		Ma (5)	5	-	-
		E........		Mi (6)	-	-	5	-	-	-	-	-	-	-	-	-	-	-	-	-	-	1		X (0)	-	-	-
		....T....		Mi (2)	-	-	-	-	-	-	-	-	-	2	-	-	-	-	-	-	-	-		X (0)	-	-	-
		........M		U (1)	1	-	-	-	-	-	-	-	-	-	-	-	-	-	-	-	-	-		X (0)	-	-	-
		.....H...		U (1)	-	-	-	-	-	-	-	-	-	1	-	-	-	-	-	-	-	-		X (0)	-	-	-
		E.R......		X (0)	-	-	-	-	-	-	-	-	-	-	-	-	-	-	-	-	-	-		U (2)	2	-	-
PB2	196 - 204	CKIAPLMVA	83	I (86)	24	16	14	2	2	1	1	1	1	6	4	1	1	2	1	1	4	1	41	I (93)	85	2	5
		.R.......		Ma (10)	6	-	-	1	-	-	-	-	-	-	-	2	-	-	-	-	-	-		Ma (7)	7	-	-
		...T.....		Mi (2)	-	-	-	-	-	-	-	-	-	2	-	-	-	-	-	-	-	-		X (0)	-	-	-
		....H....		U (1)	-	-	-	-	-	-	-	-	-	1	-	-	-	-	-	-	-	-		X (0)	-	-	-
		.......M.		U (1)	1	-	-	-	-	-	-	-	-	-	-	-	-	-	-	-	-	-		X (0)	-	-	-
PB2	197 - 205	KIAPLMVAY	83	I (86)	24	16	14	2	2	1	1	1	1	6	4	1	1	2	1	1	4	1	41	I (93)	85	2	5
		R........		Ma (10)	6	-	-	1	-	-	-	-	-	-	-	2	-	-	-	-	-	-		Ma (7)	7	-	-
		..T......		Mi (2)	-	-	-	-	-	-	-	-	-	2	-	-	-	-	-	-	-	-		X (0)	-	-	-
		......M..		U (1)	1	-	-	-	-	-	-	-	-	-	-	-	-	-	-	-	-	-		X (0)	-	-	-
		...H.....		U (1)	-	-	-	-	-	-	-	-	-	1	-	-	-	-	-	-	-	-		X (0)	-	-	-
PB2	198 - 206	IAPLMVAYM	83	I (95)	30	16	14	4	2	1	1	1	1	6	4	4	1	2	1	1	4	1	41	I (100)	93	2	5
		.T.......		Ma (2)	-	-	-	-	-	-	-	-	-	2	-	-	-	-	-	-	-	-		X (0)	-	-	-
		..H......		U (1)	-	-	-	-	-	-	-	-	-	1	-	-	-	-	-	-	-	-		X (0)	-	-	-
		.....M...		U (1)	1	-	-	-	-	-	-	-	-	-	-	-	-	-	-	-	-	-		X (0)	-	-	-
PB2	199 - 207	APLMVAYML	83	I (95)	30	16	14	4	2	1	1	1	1	6	4	4	1	2	1	1	4	1	41	I (100)	93	2	5
		T........		Ma (2)	-	-	-	-	-	-	-	-	-	2	-	-	-	-	-	-	-	-		X (0)	-	-	-
		....M....		U (1)	1	-	-	-	-	-	-	-	-	-	-	-	-	-	-	-	-	-		X (0)	-	-	-
		.H.......		U (1)	-	-	-	-	-	-	-	-	-	1	-	-	-	-	-	-	-	-		X (0)	-	-	-
PB2	200 - 208	PLMVAYMLE	83	I (98)	30	16	14	4	2	1	1	1	1	8	4	4	1	2	1	1	4	1	41	I (100)	93	2	5
		H........		U (1)	-	-	-	-	-	-	-	-	-	1	-	-	-	-	-	-	-	-		X (0)	-	-	-
		...M.....		U (1)	1	-	-	-	-	-	-	-	-	-	-	-	-	-	-	-	-	-		X (0)	-	-	-
PB2	201 - 209	LMVAYMLER	83	I (99)	30	16	14	4	2	1	1	1	1	10	4	4	1	2	1	1	4	1	41	I (100)	93	2	5
		..M......		U (1)	1	-	-	-	-	-	-	-	-	-	-	-	-	-	-	-	-	-		X (0)	-	-	-
PB2	202 - 210	MVAYMLERE	83	I (99)	30	16	14	4	2	1	1	1	1	10	4	4	1	2	1	1	4	1	41	I (100)	93	2	5
		.M.......		U (1)	1	-	-	-	-	-	-	-	-	-	-	-	-	-	-	-	-	-		X (0)	-	-	-
PB2	203 - 211	VAYMLEREL	83	I (99)	30	16	14	4	2	1	1	1	1	10	4	4	1	2	1	1	4	1	41	I (100)	93	2	5
		M........		U (1)	1	-	-	-	-	-	-	-	-	-	-	-	-	-	-	-	-	-		X (0)	-	-	-
PB2	204 - 212	AYMLERELV	83	I (100)	31	16	14	4	2	1	1	1	1	10	4	4	1	2	1	1	4	1	41	I (100)	93	2	5
PB2	205 - 213	YMLERELVR	83	I (100)	31	16	14	4	2	1	1	1	1	10	4	4	1	2	1	1	4	1	41	I (100)	93	2	5
PB2	206 - 214	MLERELVRK	83	I (100)	31	16	14	4	2	1	1	1	1	10	4	4	1	2	1	1	4	1	41	I (100)	93	2	5
PB2	207 - 215	LERELVRKT	83	I (100)	31	16	14	4	2	1	1	1	1	10	4	4	1	2	1	1	4	1	41	I (100)	93	2	5
PB2	208 - 216	ERELVRKTR	83	I (100)	31	16	14	4	2	1	1	1	1	10	4	4	1	2	1	1	4	1	41	I (100)	93	2	5
PB2	209 - 217	RELVRKTRF	83	I (100)	31	16	14	4	2	1	1	1	1	10	4	4	1	2	1	1	4	1	41	I (100)	93	2	5
PB2	210 - 218	ELVRKTRFL	83	I (100)	31	16	14	4	2	1	1	1	1	10	4	4	1	2	1	1	4	1	41	I (100)	93	2	5
PB2	211 - 219	LVRKTRFLP	83	I (100)	31	16	14	4	2	1	1	1	1	10	4	4	1	2	1	1	4	1	41	I (100)	93	2	5
PB2	212 - 220	VRKTRFLPV	83	I (100)	31	16	14	4	2	1	1	1	1	10	4	4	1	2	1	1	4	1	41	I (100)	93	2	5
PB2	213 - 221	RKTRFLPVA	83	I (100)	31	16	14	4	2	1	1	1	1	10	4	4	1	2	1	1	4	1	41	I (100)	93	2	5
PB2	214 - 222	KTRFLPVAG	83	I (100)	31	16	14	4	2	1	1	1	1	10	4	4	1	2	1	1	4	1	41	I (100)	93	2	5
PB2	215 - 223	TRFLPVAGG	83	I (100)	31	16	14	4	2	1	1	1	1	10	4	4	1	2	1	1	4	1	41	I (100)	93	2	5
PB2	216 - 224	RFLPVAGGT	83	I (100)	31	16	14	4	2	1	1	1	1	10	4	4	1	2	1	1	4	1	41	I (98)	90	2	5
		........S		X (0)	-	-	-	-	-	-	-	-	-	-	-	-	-	-	-	-	-	-		U (2)	2	-	-
PB2	217 - 225	FLPVAGGTS	83	I (100)	31	16	14	4	2	1	1	1	1	10	4	4	1	2	1	1	4	1	41	I (98)	90	2	5
		.......S.		X (0)	-	-	-	-	-	-	-	-	-	-	-	-	-	-	-	-	-	-		U (2)	2	-	-
PB2	218 - 226	LPVAGGTSS	83	I (100)	31	16	14	4	2	1	1	1	1	10	4	4	1	2	1	1	4	1	41	I (98)	90	2	5
		......S..		X (0)	-	-	-	-	-	-	-	-	-	-	-	-	-	-	-	-	-	-		U (2)	2	-	-
PB2	219 - 227	PVAGGTSSV	83	I (100)	31	16	14	4	2	1	1	1	1	10	4	4	1	2	1	1	4	1	41	I (98)	90	2	5
		.....S...		X (0)	-	-	-	-	-	-	-	-	-	-	-	-	-	-	-	-	-	-		U (2)	2	-	-
PB2	220 - 228	VAGGTSSVY	83	I (100)	31	16	14	4	2	1	1	1	1	10	4	4	1	2	1	1	4	1	41	I (98)	90	2	5
		....S....		X (0)	-	-	-	-	-	-	-	-	-	-	-	-	-	-	-	-	-	-		U (2)	2	-	-
PB2	221 - 229	AGGTSSVYI	83	I (100)	31	16	14	4	2	1	1	1	1	10	4	4	1	2	1	1	4	1	41	I (98)	90	2	5
		...S.....		X (0)	-	-	-	-	-	-	-	-	-	-	-	-	-	-	-	-	-	-		U (2)	2	-	-
PB2	222 - 230	GGTSSVYIE	83	I (100)	31	16	14	4	2	1	1	1	1	10	4	4	1	2	1	1	4	1	41	I (98)	90	2	5
		..S......		X (0)	-	-	-	-	-	-	-	-	-	-	-	-	-	-	-	-	-	-		U (2)	2	-	-
PB2	223 - 231	GTSSVYIEV	83	I (100)	31	16	14	4	2	1	1	1	1	10	4	4	1	2	1	1	4	1	41	I (98)	90	2	5
		.S.......		X (0)	-	-	-	-	-	-	-	-	-	-	-	-	-	-	-	-	-	-		U (2)	2	-	-
PB2	224 - 232	TSSVYIEVL	83	I (100)	31	16	14	4	2	1	1	1	1	10	4	4	1	2	1	1	4	1	41	I (98)	90	2	5
		S........		X (0)	-	-	-	-	-	-	-	-	-	-	-	-	-	-	-	-	-	-		U (2)	2	-	-
PB2	225 - 233	SSVYIEVLH	83	I (100)	31	16	14	4	2	1	1	1	1	10	4	4	1	2	1	1	4	1	41	I (100)	93	2	5
PB2	226 - 234	SVYIEVLHL	83	I (100)	31	16	14	4	2	1	1	1	1	10	4	4	1	2	1	1	4	1	41	I (100)	93	2	5
PB2	227 - 235	VYIEVLHLT	83	I (100)	31	16	14	4	2	1	1	1	1	10	4	4	1	2	1	1	4	1	41	I (100)	93	2	5
PB2	228 - 236	YIEVLHLTQ	83	I (100)	31	16	14	4	2	1	1	1	1	10	4	4	1	2	1	1	4	1	41	I (100)	93	2	5
PB2	229 - 237	IEVLHLTQG	83	I (100)	31	16	14	4	2	1	1	1	1	10	4	4	1	2	1	1	4	1	41	I (100)	93	2	5
PB2	230 - 238	EVLHLTQGT	83	I (100)	31	16	14	4	2	1	1	1	1	10	4	4	1	2	1	1	4	1	41	I (100)	93	2	5
PB2	231 - 239	VLHLTQGTC	83	I (100)	31	16	14	4	2	1	1	1	1	10	4	4	1	2	1	1	4	1	41	I (100)	93	2	5
PB2	232 - 240	LHLTQGTCW	83	I (100)	31	16	14	4	2	1	1	1	1	10	4	4	1	2	1	1	4	1	41	I (100)	93	2	5
PB2	233 - 241	HLTQGTCWE	83	I (100)	31	16	14	4	2	1	1	1	1	10	4	4	1	2	1	1	4	1	41	I (100)	93	2	5
PB2	234 - 242	LTQGTCWEQ	83	I (100)	31	16	14	4	2	1	1	1	1	10	4	4	1	2	1	1	4	1	41	I (100)	93	2	5
PB2	235 - 243	TQGTCWEQM	84	I (100)	31	15	14	4	2	1	1	1	1	11	4	4	1	2	1	1	4	1	41	I (100)	93	2	5
PB2	236 - 244	QGTCWEQMY	84	I (100)	31	15	14	4	2	1	1	1	1	11	4	4	1	2	1	1	4	1	41	I (100)	93	2	5
PB2	237 - 245	GTCWEQMYT	84	I (100)	31	15	14	4	2	1	1	1	1	11	4	4	1	2	1	1	4	1	41	I (100)	93	2	5
PB2	238 - 246	TCWEQMYTP	84	I (100)	31	15	14	4	2	1	1	1	1	11	4	4	1	2	1	1	4	1	41	I (100)	93	2	5
PB2	239 - 247	CWEQMYTPG	84	I (100)	31	15	14	4	2	1	1	1	1	11	4	4	1	2	1	1	4	1	41	I (100)	93	2	5
PB2	240 - 248	WEQMYTPGG	84	I (100)	31	15	14	4	2	1	1	1	1	11	4	4	1	2	1	1	4	1	41	I (100)	93	2	5
PB2	241 - 249	EQMYTPGGE	84	I (100)	31	15	14	4	2	1	1	1	1	11	4	4	1	2	1	1	4	1	41	I (100)	93	2	5
PB2	242 - 250	QMYTPGGEV	84	I (100)	31	15	14	4	2	1	1	1	1	11	4	4	1	2	1	1	4	1	41	I (100)	93	2	5
PB2	243 - 251	MYTPGGEVR	84	I (100)	31	15	14	4	2	1	1	1	1	11	4	4	1	2	1	1	4	1	41	I (95)	88	2	5
		........K		X (0)	-	-	-	-	-	-	-	-	-	-	-	-	-	-	-	-	-	-		Ma (5)	5	-	-
PB2	244 - 252	YTPGGEVRN	84	I (100)	31	15	14	4	2	1	1	1	1	11	4	4	1	2	1	1	4	1	41	I (95)	88	2	5
		.......K.		X (0)	-	-	-	-	-	-	-	-	-	-	-	-	-	-	-	-	-	-		Ma (5)	5	-	-
PB2	245 - 253	TPGGEVRND	84	I (100)	31	15	14	4	2	1	1	1	1	11	4	4	1	2	1	1	4	1	41	I (95)	88	2	5
		......K..		X (0)	-	-	-	-	-	-	-	-	-	-	-	-	-	-	-	-	-	-		Ma (5)	5	-	-
PB2	246 - 254	PGGEVRNDD	84	I (100)	31	15	14	4	2	1	1	1	1	11	4	4	1	2	1	1	4	1	41	I (95)	88	2	5
		.....K...		X (0)	-	-	-	-	-	-	-	-	-	-	-	-	-	-	-	-	-	-		Ma (5)	5	-	-
PB2	247 - 255	GGEVRNDDV	84	I (100)	31	15	14	4	2	1	1	1	1	11	4	4	1	2	1	1	4	1	41	I (95)	88	2	5
		....K....		X (0)	-	-	-	-	-	-	-	-	-	-	-	-	-	-	-	-	-	-		Ma (5)	5	-	-
PB2	248 - 256	GEVRNDDVD	84	I (100)	31	15	14	4	2	1	1	1	1	11	4	4	1	2	1	1	4	1	41	I (95)	88	2	5
		...K.....		X (0)	-	-	-	-	-	-	-	-	-	-	-	-	-	-	-	-	-	-		Ma (5)	5	-	-
PB2	249 - 257	EVRNDDVDQ	84	I (100)	31	15	14	4	2	1	1	1	1	11	4	4	1	2	1	1	4	1	41	I (95)	88	2	5
		..K......		X (0)	-	-	-	-	-	-	-	-	-	-	-	-	-	-	-	-	-	-		Ma (5)	5	-	-
PB2	250 - 258	VRNDDVDQS	84	I (100)	31	15	14	4	2	1	1	1	1	11	4	4	1	2	1	1	4	1	41	I (95)	88	2	5
		.K.......		X (0)	-	-	-	-	-	-	-	-	-	-	-	-	-	-	-	-	-	-		Ma (5)	5	-	-
PB2	251 - 259	RNDDVDQSL	84	I (100)	31	15	14	4	2	1	1	1	1	11	4	4	1	2	1	1	4	1	41	I (95)	88	2	5
		K........		X (0)	-	-	-	-	-	-	-	-	-	-	-	-	-	-	-	-	-	-		Ma (5)	5	-	-
PB2	252 - 260	NDDVDQSLI	84	I (100)	31	15	14	4	2	1	1	1	1	11	4	4	1	2	1	1	4	1	41	I (100)	93	2	5
PB2	253 - 261	DDVDQSLII	84	I (100)	31	15	14	4	2	1	1	1	1	11	4	4	1	2	1	1	4	1	41	I (100)	93	2	5
PB2	254 - 262	DVDQSLIIA	84	I (100)	31	15	14	4	2	1	1	1	1	11	4	4	1	2	1	1	4	1	41	I (100)	93	2	5
PB2	255 - 263	VDQSLIIAA	84	I (100)	31	15	14	4	2	1	1	1	1	11	4	4	1	2	1	1	4	1	41	I (100)	93	2	5
PB2	256 - 264	DQSLIIAAR	84	I (100)	31	15	14	4	2	1	1	1	1	11	4	4	1	2	1	1	4	1	41	I (100)	93	2	5
PB2	257 - 265	QSLIIAARN	84	I (100)	31	15	14	4	2	1	1	1	1	11	4	4	1	2	1	1	4	1	41	I (100)	93	2	5
PB2	258 - 266	SLIIAARNI	84	I (100)	31	15	14	4	2	1	1	1	1	11	4	4	1	2	1	1	4	1	41	I (100)	93	2	5
PB2	259 - 267	LIIAARNIV	84	I (100)	31	15	14	4	2	1	1	1	1	11	4	4	1	2	1	1	4	1	41	I (100)	93	2	5
PB2	260 - 268	IIAARNIVR	84	I (100)	31	15	14	4	2	1	1	1	1	11	4	4	1	2	1	1	4	1	41	I (100)	93	2	5
PB2	261 - 269	IAARNIVRR	84	I (100)	31	15	14	4	2	1	1	1	1	11	4	4	1	2	1	1	4	1	41	I (100)	93	2	5
PB2	262 - 270	AARNIVRRA	84	I (100)	31	15	14	4	2	1	1	1	1	11	4	4	1	2	1	1	4	1	41	I (100)	93	2	5
PB2	263 - 271	ARNIVRRAT	84	I (100)	31	15	14	4	2	1	1	1	1	11	4	4	1	2	1	1	4	1	41	I (100)	93	2	5
PB2	264 - 272	RNIVRRATV	84	I (99)	31	15	14	4	2	1	1	1	1	11	2	4	1	2	1	1	4	1	41	I (100)	93	2	5
		........G		U (1)	-	-	-	-	-	-	-	-	-	-	1	-	-	-	-	-	-	-		X (0)	-	-	-
PB2	265 - 273	NIVRRATVS	84	I (99)	31	15	14	4	2	1	1	1	1	11	2	4	1	2	1	1	4	1	41	I (100)	93	2	5
		.......G.		U (1)	-	-	-	-	-	-	-	-	-	-	1	-	-	-	-	-	-	-		X (0)	-	-	-
PB2	266 - 274	IVRRATVSA	84	I (99)	31	15	14	4	2	1	1	1	1	11	2	4	1	2	1	1	4	1	41	I (95)	93	2	-
		......G..		U (1)	-	-	-	-	-	-	-	-	-	-	1	-	-	-	-	-	-	-		X (0)	-	-	-
		........V		X (0)	-	-	-	-	-	-	-	-	-	-	-	-	-	-	-	-	-	-		Ma (5)	-	-	5
PB2	267 - 275	VRRATVSAD	84	I (99)	31	15	14	4	2	1	1	1	1	11	2	4	1	2	1	1	4	1	41	I (95)	93	2	-
		.....G...		U (1)	-	-	-	-	-	-	-	-	-	-	1	-	-	-	-	-	-	-		X (0)	-	-	-
		.......V.		X (0)	-	-	-	-	-	-	-	-	-	-	-	-	-	-	-	-	-	-		Ma (5)	-	-	5
PB2	268 - 276	RRATVSADP	84	I (99)	31	15	14	4	2	1	1	1	1	11	2	4	1	2	1	1	4	1	41	I (95)	93	2	-
		....G....		U (1)	-	-	-	-	-	-	-	-	-	-	1	-	-	-	-	-	-	-		X (0)	-	-	-
		......V..		X (0)	-	-	-	-	-	-	-	-	-	-	-	-	-	-	-	-	-	-		Ma (5)	-	-	5
PB2	269 - 277	RATVSADPL	84	I (99)	31	15	14	4	2	1	1	1	1	11	2	4	1	2	1	1	4	1	41	I (95)	93	2	-
		...G.....		U (1)	-	-	-	-	-	-	-	-	-	-	1	-	-	-	-	-	-	-		X (0)	-	-	-
		.....V...		X (0)	-	-	-	-	-	-	-	-	-	-	-	-	-	-	-	-	-	-		Ma (5)	-	-	5
PB2	270 - 278	ATVSADPLA	84	I (99)	31	15	14	4	2	1	1	1	1	11	2	4	1	2	1	1	4	1	41	I (95)	93	2	-
		..G......		U (1)	-	-	-	-	-	-	-	-	-	-	1	-	-	-	-	-	-	-		X (0)	-	-	-
		....V....		X (0)	-	-	-	-	-	-	-	-	-	-	-	-	-	-	-	-	-	-		Ma (5)	-	-	5
PB2	271 - 279	TVSADPLAS	84	I (99)	31	15	14	4	2	1	1	1	1	11	2	4	1	2	1	1	4	1	41	I (95)	93	2	-
		.G.......		U (1)	-	-	-	-	-	-	-	-	-	-	1	-	-	-	-	-	-	-		X (0)	-	-	-
		...V.....		X (0)	-	-	-	-	-	-	-	-	-	-	-	-	-	-	-	-	-	-		Ma (5)	-	-	5
PB2	272 - 280	VSADPLASL	84	I (99)	31	15	14	4	2	1	1	1	1	11	2	4	1	2	1	1	4	1	43	I (95)	93	2	-
		G........		U (1)	-	-	-	-	-	-	-	-	-	-	1	-	-	-	-	-	-	-		X (0)	-	-	-
		..V......		X (0)	-	-	-	-	-	-	-	-	-	-	-	-	-	-	-	-	-	-		Ma (5)	-	-	5
PB2	273 - 281	SADPLASLL	84	I (100)	31	15	14	4	2	1	1	1	1	11	4	4	1	2	1	1	4	1	43	I (95)	93	2	-
		.V.......		X (0)	-	-	-	-	-	-	-	-	-	-	-	-	-	-	-	-	-	-		Ma (5)	-	-	5
PB2	274 - 282	ADPLASLLE	84	I (100)	31	15	14	4	2	1	1	1	1	11	4	4	1	2	1	1	4	1	43	I (95)	93	2	-
		V........		X (0)	-	-	-	-	-	-	-	-	-	-	-	-	-	-	-	-	-	-		Ma (5)	-	-	5
PB2	275 - 283	DPLASLLEM	84	I (100)	31	15	14	4	2	1	1	1	1	11	4	4	1	2	1	1	4	1	43	I (98)	93	-	5
		........I		X (0)	-	-	-	-	-	-	-	-	-	-	-	-	-	-	-	-	-	-		U (2)	-	2	-
PB2	276 - 284	PLASLLEMC	84	I (100)	31	15	14	4	2	1	1	1	1	11	4	4	1	2	1	1	4	1	43	I (98)	93	-	5
		.......I.		X (0)	-	-	-	-	-	-	-	-	-	-	-	-	-	-	-	-	-	-		U (2)	-	2	-
PB2	277 - 285	LASLLEMCH	84	I (100)	31	15	14	4	2	1	1	1	1	11	4	4	1	2	1	1	4	1	43	I (98)	93	-	5
		......I..		X (0)	-	-	-	-	-	-	-	-	-	-	-	-	-	-	-	-	-	-		U (2)	-	2	-
PB2	278 - 286	ASLLEMCHS	84	I (100)	31	15	14	4	2	1	1	1	1	11	4	4	1	2	1	1	4	1	43	I (98)	93	-	5
		.....I..G		X (0)	-	-	-	-	-	-	-	-	-	-	-	-	-	-	-	-	-	-		U (2)	-	2	-
PB2	279 - 287	SLLEMCHST	84	I (100)	31	15	14	4	2	1	1	1	1	11	4	4	1	2	1	1	4	1	43	I (98)	93	-	5
		....I..G.		X (0)	-	-	-	-	-	-	-	-	-	-	-	-	-	-	-	-	-	-		U (2)	-	2	-
PB2	280 - 288	LLEMCHSTQ	84	I (100)	31	15	14	4	2	1	1	1	1	11	4	4	1	2	1	1	4	1	43	I (98)	93	-	5
		...I..G..		X (0)	-	-	-	-	-	-	-	-	-	-	-	-	-	-	-	-	-	-		U (2)	-	2	-
PB2	281 - 289	LEMCHSTQI	84	I (100)	31	15	14	4	2	1	1	1	1	11	4	4	1	2	1	1	4	1	43	I (98)	93	-	5
		..I..G...		X (0)	-	-	-	-	-	-	-	-	-	-	-	-	-	-	-	-	-	-		U (2)	-	2	-
PB2	282 - 290	EMCHSTQIG	84	I (100)	31	15	14	4	2	1	1	1	1	11	4	4	1	2	1	1	4	1	43	I (98)	93	-	5
		.I..G....		X (0)	-	-	-	-	-	-	-	-	-	-	-	-	-	-	-	-	-	-		U (2)	-	2	-
PB2	283 - 291	MCHSTQIGG	84	I (100)	31	15	14	4	2	1	1	1	1	11	4	4	1	2	1	1	4	1	43	I (98)	93	-	5
		I..G.....		X (0)	-	-	-	-	-	-	-	-	-	-	-	-	-	-	-	-	-	-		U (2)	-	2	-
PB2	284 - 292	CHSTQIGGI	84	I (56)	-	13	14	-	-	1	-	1	-	11	4	1	1	2	1	1	4	1	43	U (2)	2	-	-
		........V		Ma (44)	31	2	-	4	2	-	1	-	1	-	-	2	-	-	-	-	-	-		I (95)	91	-	5
		..G......		X (0)	-	-	-	-	-	-	-	-	-	-	-	-	-	-	-	-	-	-		U (2)	-	2	-
PB2	285 - 293	HSTQIGGIR	84	I (56)	-	13	14	-	-	1	-	1	-	11	4	1	1	2	1	1	4	1	43	U (2)	2	-	-
		.......V.		Ma (44)	31	2	-	4	2	-	1	-	1	-	-	2	-	-	-	-	-	-		I (95)	91	-	5
		.G.......		X (0)	-	-	-	-	-	-	-	-	-	-	-	-	-	-	-	-	-	-		U (2)	-	2	-
PB2	286 - 294	STQIGGIRM	84	I (56)	-	13	14	-	-	1	-	1	-	11	4	1	1	2	1	1	4	1	43	U (2)	2	-	-
		......V..		Ma (44)	31	2	-	4	2	-	1	-	1	-	-	2	-	-	-	-	-	-		I (95)	91	-	5
		G........		X (0)	-	-	-	-	-	-	-	-	-	-	-	-	-	-	-	-	-	-		U (2)	-	2	-
PB2	287 - 295	TQIGGIRMV	84	I (56)	-	13	14	-	-	1	-	1	-	11	4	1	1	2	1	1	4	1	43	Ma (5)	2	2	-
		.....V...		Ma (44)	31	2	-	4	2	-	1	-	1	-	-	2	-	-	-	-	-	-		I (95)	91	-	5
PB2	288 - 296	QIGGIRMVD	84	I (56)	-	13	14	-	-	1	-	1	-	11	4	1	1	2	1	1	4	1	43	Ma (5)	2	2	-
		....V....		Ma (44)	31	2	-	4	2	-	1	-	1	-	-	2	-	-	-	-	-	-		I (95)	91	-	5
PB2	289 - 297	IGGIRMVDI	84	I (56)	-	13	14	-	-	1	-	1	-	11	4	1	1	2	1	1	4	1	43	Ma (5)	2	2	-
		...V.....		Ma (44)	31	2	-	4	2	-	1	-	1	-	-	2	-	-	-	-	-	-		I (95)	91	-	5
PB2	290 - 298	GGIRMVDIL	84	I (55)	-	13	14	-	-	1	-	1	-	11	2	1	1	2	1	1	4	1	43	Ma (5)	2	2	-
		..V......		Ma (44)	31	2	-	4	2	-	1	-	1	-	-	2	-	-	-	-	-	-		I (95)	91	-	5
		........I		U (1)	-	-	-	-	-	-	-	-	-	-	1	-	-	-	-	-	-	-		X (0)	-	-	-
PB2	291 - 299	GIRMVDILR	84	I (55)	-	13	14	-	-	1	-	1	-	11	2	1	1	2	1	1	4	1	43	Ma (5)	2	2	-
		.V.......		Ma (44)	31	2	-	4	2	-	1	-	1	-	-	2	-	-	-	-	-	-		I (95)	91	-	5
		.......I.		U (1)	-	-	-	-	-	-	-	-	-	-	1	-	-	-	-	-	-	-		X (0)	-	-	-
PB2	292 - 300	IRMVDILRQ	84	I (55)	-	13	14	-	-	1	-	1	-	11	2	1	1	2	1	1	4	1	43	Ma (5)	2	2	-
		V........		Ma (44)	31	2	-	4	2	-	1	-	1	-	-	2	-	-	-	-	-	-		I (95)	91	-	5
		......I..		U (1)	-	-	-	-	-	-	-	-	-	-	1	-	-	-	-	-	-	-		X (0)	-	-	-
PB2	293 - 301	RMVDILRQN	84	I (99)	31	15	14	4	2	1	1	1	1	11	2	4	1	2	1	1	4	1	43	I (100)	93	2	5
		.....I...		U (1)	-	-	-	-	-	-	-	-	-	-	1	-	-	-	-	-	-	-		X (0)	-	-	-
PB2	294 - 302	MVDILRQNP	84	I (99)	31	15	14	4	2	1	1	1	1	11	2	4	1	2	1	1	4	1	43	I (100)	93	2	5
		....I....		U (1)	-	-	-	-	-	-	-	-	-	-	1	-	-	-	-	-	-	-		X (0)	-	-	-
PB2	295 - 303	VDILRQNPT	84	I (99)	31	15	14	4	2	1	1	1	1	11	2	4	1	2	1	1	4	1	43	I (100)	93	2	5
		...I.....		U (1)	-	-	-	-	-	-	-	-	-	-	1	-	-	-	-	-	-	-		X (0)	-	-	-
PB2	296 - 304	DILRQNPTE	84	I (99)	31	15	14	4	2	1	1	1	1	11	2	4	1	2	1	1	4	1	43	I (100)	93	2	5
		..I......		U (1)	-	-	-	-	-	-	-	-	-	-	1	-	-	-	-	-	-	-		X (0)	-	-	-
PB2	297 - 305	ILRQNPTEE	84	I (99)	31	15	14	4	2	1	1	1	1	11	2	4	1	2	1	1	4	1	43	I (100)	93	2	5
		.I.......		U (1)	-	-	-	-	-	-	-	-	-	-	1	-	-	-	-	-	-	-		X (0)	-	-	-
PB2	298 - 306	LRQNPTEEQ	84	I (99)	31	15	14	4	2	1	1	1	1	11	2	4	1	2	1	1	4	1	43	I (100)	93	2	5
		I........		U (1)	-	-	-	-	-	-	-	-	-	-	1	-	-	-	-	-	-	-		X (0)	-	-	-
PB2	299 - 307	RQNPTEEQA	84	I (100)	31	15	14	4	2	1	1	1	1	11	4	4	1	2	1	1	4	1	43	I (100)	93	2	5
PB2	300 - 308	QNPTEEQAV	84	I (100)	31	15	14	4	2	1	1	1	1	11	4	4	1	2	1	1	4	1	43	I (100)	93	2	5
PB2	301 - 309	NPTEEQAVD	84	I (100)	31	15	14	4	2	1	1	1	1	11	4	4	1	2	1	1	4	1	43	I (100)	93	2	5
PB2	302 - 310	PTEEQAVDI	84	I (100)	31	15	14	4	2	1	1	1	1	11	4	4	1	2	1	1	4	1	43	I (100)	93	2	5
PB2	303 - 311	TEEQAVDIC	84	I (100)	31	15	14	4	2	1	1	1	1	11	4	4	1	2	1	1	4	1	43	I (100)	93	2	5
PB2	304 - 312	EEQAVDICK	84	I (100)	31	15	14	4	2	1	1	1	1	11	4	4	1	2	1	1	4	1	43	I (100)	93	2	5
PB2	305 - 313	EQAVDICKA	84	I (100)	31	15	14	4	2	1	1	1	1	11	4	4	1	2	1	1	4	1	43	I (100)	93	2	5
PB2	306 - 314	QAVDICKAA	84	I (100)	31	15	14	4	2	1	1	1	1	11	4	4	1	2	1	1	4	1	43	I (100)	93	2	5
PB2	307 - 315	AVDICKAAM	84	I (99)	31	15	14	4	2	1	1	1	1	10	4	4	1	2	1	1	4	1	43	I (100)	93	2	5
		........L		U (1)	-	-	-	-	-	-	-	-	-	1	-	-	-	-	-	-	-	-		X (0)	-	-	-
PB2	308 - 316	VDICKAAMG	84	I (99)	31	15	14	4	2	1	1	1	1	10	4	4	1	2	1	1	4	1	43	I (100)	93	2	5
		.......L.		U (1)	-	-	-	-	-	-	-	-	-	1	-	-	-	-	-	-	-	-		X (0)	-	-	-
PB2	309 - 317	DICKAAMGL	84	I (99)	31	15	14	4	2	1	1	1	1	10	4	4	1	2	1	1	4	1	43	I (100)	93	2	5
		......L..		U (1)	-	-	-	-	-	-	-	-	-	1	-	-	-	-	-	-	-	-		X (0)	-	-	-
PB2	310 - 318	ICKAAMGLR	84	I (99)	31	15	14	4	2	1	1	1	1	10	4	4	1	2	1	1	4	1	43	I (100)	93	2	5
		.....L...		U (1)	-	-	-	-	-	-	-	-	-	1	-	-	-	-	-	-	-	-		X (0)	-	-	-
PB2	311 - 319	CKAAMGLRI	84	I (98)	31	15	14	4	2	1	1	1	1	10	4	4	1	1	1	1	4	1	43	I (100)	93	2	5
		........V		U (1)	-	-	-	-	-	-	-	-	-	-	-	-	-	1	-	-	-	-		X (0)	-	-	-
		....L....		U (1)	-	-	-	-	-	-	-	-	-	1	-	-	-	-	-	-	-	-		X (0)	-	-	-
PB2	312 - 320	KAAMGLRIS	84	I (98)	31	15	14	4	2	1	1	1	1	10	4	4	1	1	1	1	4	1	43	I (100)	93	2	5
		.......V.		U (1)	-	-	-	-	-	-	-	-	-	-	-	-	-	1	-	-	-	-		X (0)	-	-	-
		...L.....		U (1)	-	-	-	-	-	-	-	-	-	1	-	-	-	-	-	-	-	-		X (0)	-	-	-
PB2	313 - 321	AAMGLRISS	84	I (98)	31	15	14	4	2	1	1	1	1	10	4	4	1	1	1	1	4	1	43	I (100)	93	2	5
		..L......		U (1)	-	-	-	-	-	-	-	-	-	1	-	-	-	-	-	-	-	-		X (0)	-	-	-
		......V..		U (1)	-	-	-	-	-	-	-	-	-	-	-	-	-	1	-	-	-	-		X (0)	-	-	-
PB2	314 - 322	AMGLRISSS	84	I (98)	31	15	14	4	2	1	1	1	1	10	4	4	1	1	1	1	4	1	43	I (100)	93	2	5
		.L.......		U (1)	-	-	-	-	-	-	-	-	-	1	-	-	-	-	-	-	-	-		X (0)	-	-	-
		.....V...		U (1)	-	-	-	-	-	-	-	-	-	-	-	-	-	1	-	-	-	-		X (0)	-	-	-
PB2	315 - 323	MGLRISSSF	84	I (98)	31	15	14	4	2	1	1	1	1	10	4	4	1	1	1	1	4	1	42	I (100)	93	2	5
		....V....		U (1)	-	-	-	-	-	-	-	-	-	-	-	-	-	1	-	-	-	-		X (0)	-	-	-
		L........		U (1)	-	-	-	-	-	-	-	-	-	1	-	-	-	-	-	-	-	-		X (0)	-	-	-
PB2	316 - 324	GLRISSSFS	84	I (99)	31	15	14	4	2	1	1	1	1	11	4	4	1	1	1	1	4	1	42	I (100)	93	2	5
		...V.....		U (1)	-	-	-	-	-	-	-	-	-	-	-	-	-	1	-	-	-	-		X (0)	-	-	-
PB2	317 - 325	LRISSSFSF	84	I (99)	31	15	14	4	2	1	1	1	1	11	4	4	1	1	1	1	4	1	42	I (100)	93	2	5
		..V......		U (1)	-	-	-	-	-	-	-	-	-	-	-	-	-	1	-	-	-	-		X (0)	-	-	-
PB2	318 - 326	RISSSFSFG	84	I (99)	31	15	14	4	2	1	1	1	1	11	4	4	1	1	1	1	4	1	42	I (100)	93	2	5
		.V.......		U (1)	-	-	-	-	-	-	-	-	-	-	-	-	-	1	-	-	-	-		X (0)	-	-	-
PB2	319 - 327	ISSSFSFGG	84	I (99)	31	15	14	4	2	1	1	1	1	11	4	4	1	1	1	1	4	1	42	I (100)	93	2	5
		V........		U (1)	-	-	-	-	-	-	-	-	-	-	-	-	-	1	-	-	-	-		X (0)	-	-	-
PB2	320 - 328	SSSFSFGGF	84	I (100)	31	15	14	4	2	1	1	1	1	11	4	4	1	2	1	1	4	1	42	I (100)	93	2	5
PB2	321 - 329	SSFSFGGFT	84	I (100)	31	15	14	4	2	1	1	1	1	11	4	4	1	2	1	1	4	1	42	I (100)	93	2	5
PB2	322 - 330	SFSFGGFTF	84	I (100)	31	15	14	4	2	1	1	1	1	11	4	4	1	2	1	1	4	1	42	I (100)	93	2	5
PB2	323 - 331	FSFGGFTFK	84	I (100)	31	15	14	4	2	1	1	1	1	11	4	4	1	2	1	1	4	1	42	I (100)	93	2	5
PB2	324 - 332	SFGGFTFKR	84	I (100)	31	15	14	4	2	1	1	1	1	11	4	4	1	2	1	1	4	1	43	I (100)	93	2	5
PB2	325 - 333	FGGFTFKRT	84	I (100)	31	15	14	4	2	1	1	1	1	11	4	4	1	2	1	1	4	1	43	I (100)	93	2	5
PB2	326 - 334	GGFTFKRTS	84	I (100)	31	15	14	4	2	1	1	1	1	11	4	4	1	2	1	1	4	1	43	I (100)	93	2	5
PB2	327 - 335	GFTFKRTSG	84	I (100)	31	15	14	4	2	1	1	1	1	11	4	4	1	2	1	1	4	1	43	I (100)	93	2	5
PB2	328 - 336	FTFKRTSGS	84	I (100)	31	15	14	4	2	1	1	1	1	11	4	4	1	2	1	1	4	1	43	I (100)	93	2	5
PB2	329 - 337	TFKRTSGSS	84	I (100)	31	15	14	4	2	1	1	1	1	11	4	4	1	2	1	1	4	1	43	I (100)	93	2	5
PB2	330 - 338	FKRTSGSSV	84	I (97)	30	15	14	4	2	1	1	1	1	11	4	1	1	2	1	1	4	1	43	I (100)	93	2	5
		........I		Ma (2)	-	-	-	-	-	-	-	-	-	-	-	2	-	-	-	-	-	-		X (0)	-	-	-
		........D		U (1)	1	-	-	-	-	-	-	-	-	-	-	-	-	-	-	-	-	-		X (0)	-	-	-
PB2	331 - 339	KRTSGSSVK	84	I (97)	30	15	14	4	2	1	1	1	1	11	4	1	1	2	1	1	4	1	43	I (100)	93	2	5
		.......I.		Ma (2)	-	-	-	-	-	-	-	-	-	-	-	2	-	-	-	-	-	-		X (0)	-	-	-
		.......D.		U (1)	1	-	-	-	-	-	-	-	-	-	-	-	-	-	-	-	-	-		X (0)	-	-	-
PB2	332 - 340	RTSGSSVKR	84	I (81)	30	2	13	4	2	1	1	1	1	11	4	1	1	2	1	1	2	1	43	I (100)	93	2	5
		........K		Ma (16)	-	13	1	-	-	-	-	-	-	-	-	-	-	-	-	-	1	-		X (0)	-	-	-
		......I..		Mi (2)	-	-	-	-	-	-	-	-	-	-	-	2	-	-	-	-	-	-		X (0)	-	-	-
		......D..		U (1)	1	-	-	-	-	-	-	-	-	-	-	-	-	-	-	-	-	-		X (0)	-	-	-
PB2	333 - 341	TSGSSVKRE	84	I (81)	30	2	13	4	2	1	1	1	1	11	4	1	1	2	1	1	2	1	43	I (100)	93	2	5
		.......K.		Ma (16)	-	13	1	-	-	-	-	-	-	-	-	-	-	-	-	-	1	-		X (0)	-	-	-
		.....I...		Mi (2)	-	-	-	-	-	-	-	-	-	-	-	2	-	-	-	-	-	-		X (0)	-	-	-
		.....D...		U (1)	1	-	-	-	-	-	-	-	-	-	-	-	-	-	-	-	-	-		X (0)	-	-	-
PB2	334 - 342	SGSSVKREE	84	I (81)	30	2	13	4	2	1	1	1	1	11	4	1	1	2	1	1	2	1	43	I (100)	93	2	5
		......K..		Ma (16)	-	13	1	-	-	-	-	-	-	-	-	-	-	-	-	-	1	-		X (0)	-	-	-
		....I....		Mi (2)	-	-	-	-	-	-	-	-	-	-	-	2	-	-	-	-	-	-		X (0)	-	-	-
		....D....		U (1)	1	-	-	-	-	-	-	-	-	-	-	-	-	-	-	-	-	-		X (0)	-	-	-
PB2	335 - 343	GSSVKREEE	84	I (81)	30	2	13	4	2	1	1	1	1	11	4	1	1	2	1	1	2	1	43	I (100)	93	2	5
		.....K...		Ma (16)	-	13	1	-	-	-	-	-	-	-	-	-	-	-	-	-	1	-		X (0)	-	-	-
		...I.....		Mi (2)	-	-	-	-	-	-	-	-	-	-	-	2	-	-	-	-	-	-		X (0)	-	-	-
		...D.....		U (1)	1	-	-	-	-	-	-	-	-	-	-	-	-	-	-	-	-	-		X (0)	-	-	-
PB2	336 - 344	SSVKREEEV	84	I (80)	29	2	13	4	2	1	1	1	1	11	4	1	1	2	1	1	2	1	43	I (100)	93	2	5
		....K....		Ma (16)	-	13	1	-	-	-	-	-	-	-	-	-	-	-	-	-	1	-		X (0)	-	-	-
		..I......		Mi (2)	-	-	-	-	-	-	-	-	-	-	-	2	-	-	-	-	-	-		X (0)	-	-	-
		........M		U (1)	1	-	-	-	-	-	-	-	-	-	-	-	-	-	-	-	-	-		X (0)	-	-	-
		..D......		U (1)	1	-	-	-	-	-	-	-	-	-	-	-	-	-	-	-	-	-		X (0)	-	-	-
PB2	337 - 345	SVKREEEVL	84	I (80)	29	2	13	4	2	1	1	1	1	11	4	1	1	2	1	1	2	1	43	I (100)	93	2	5
		...K.....		Ma (16)	-	13	1	-	-	-	-	-	-	-	-	-	-	-	-	-	1	-		X (0)	-	-	-
		.I.......		Mi (2)	-	-	-	-	-	-	-	-	-	-	-	2	-	-	-	-	-	-		X (0)	-	-	-
		.D.......		U (1)	1	-	-	-	-	-	-	-	-	-	-	-	-	-	-	-	-	-		X (0)	-	-	-
		.......M.		U (1)	1	-	-	-	-	-	-	-	-	-	-	-	-	-	-	-	-	-		X (0)	-	-	-
PB2	338 - 346	VKREEEVLT	84	I (80)	29	2	13	4	2	1	1	1	1	11	4	1	1	2	1	1	2	1	42	I (100)	93	2	5
		..K......		Ma (16)	-	13	1	-	-	-	-	-	-	-	-	-	-	-	-	-	1	-		X (0)	-	-	-
		I........		Mi (2)	-	-	-	-	-	-	-	-	-	-	-	2	-	-	-	-	-	-		X (0)	-	-	-
		D........		U (1)	1	-	-	-	-	-	-	-	-	-	-	-	-	-	-	-	-	-		X (0)	-	-	-
		......M..		U (1)	1	-	-	-	-	-	-	-	-	-	-	-	-	-	-	-	-	-		X (0)	-	-	-
PB2	339 - 347	KREEEVLTG	84	I (83)	30	2	13	4	2	1	1	1	1	11	4	4	1	2	1	1	2	1	42	I (100)	93	2	5
		.K.......		Ma (16)	-	13	1	-	-	-	-	-	-	-	-	-	-	-	-	-	1	-		X (0)	-	-	-
		.....M...		U (1)	1	-	-	-	-	-	-	-	-	-	-	-	-	-	-	-	-	-		X (0)	-	-	-
PB2	340 - 348	REEEVLTGN	84	I (83)	30	2	13	4	2	1	1	1	1	11	4	4	1	2	1	1	2	1	42	I (98)	91	2	5
		K........		Ma (16)	-	13	1	-	-	-	-	-	-	-	-	-	-	-	-	-	1	-		X (0)	-	-	-
		....M....		U (1)	1	-	-	-	-	-	-	-	-	-	-	-	-	-	-	-	-	-		X (0)	-	-	-
		........K		X (0)	-	-	-	-	-	-	-	-	-	-	-	-	-	-	-	-	-	-		U (2)	2	-	-
PB2	341 - 349	EEEVLTGNL	84	I (99)	30	15	14	4	2	1	1	1	1	11	4	4	1	2	1	1	4	1	41	I (100)	93	2	5
		...M.....		U (1)	1	-	-	-	-	-	-	-	-	-	-	-	-	-	-	-	-	-		X (0)	-	-	-
PB2	342 - 350	EEVLTGNLQ	84	I (99)	30	15	14	4	2	1	1	1	1	11	4	4	1	2	1	1	4	1	41	I (100)	93	2	5
		..M......		U (1)	1	-	-	-	-	-	-	-	-	-	-	-	-	-	-	-	-	-		X (0)	-	-	-
PB2	343 - 351	EVLTGNLQT	84	I (99)	30	15	14	4	2	1	1	1	1	11	4	4	1	2	1	1	4	1	41	I (100)	93	2	5
		.M.......		U (1)	1	-	-	-	-	-	-	-	-	-	-	-	-	-	-	-	-	-		X (0)	-	-	-
PB2	344 - 352	VLTGNLQTL	84	I (99)	30	15	14	4	2	1	1	1	1	11	4	4	1	2	1	1	4	1	41	I (100)	93	2	5
		M........		U (1)	1	-	-	-	-	-	-	-	-	-	-	-	-	-	-	-	-	-		X (0)	-	-	-
PB2	345 - 353	LTGNLQTLK	84	I (100)	31	15	14	4	2	1	1	1	1	11	4	4	1	2	1	1	4	1	41	I (100)	93	2	5
PB2	346 - 354	TGNLQTLKI	84	I (99)	31	15	14	4	2	1	1	1	1	11	2	4	1	2	1	1	4	1	41	I (98)	90	2	5
		........M		U (1)	-	-	-	-	-	-	-	-	-	-	1	-	-	-	-	-	-	-		X (0)	-	-	-
		........V		X (0)	-	-	-	-	-	-	-	-	-	-	-	-	-	-	-	-	-	-		U (2)	2	-	-
PB2	347 - 355	GNLQTLKIR	84	I (99)	31	15	14	4	2	1	1	1	1	11	2	4	1	2	1	1	4	1	41	I (98)	90	2	5
		.......M.		U (1)	-	-	-	-	-	-	-	-	-	-	1	-	-	-	-	-	-	-		X (0)	-	-	-
		.......V.		X (0)	-	-	-	-	-	-	-	-	-	-	-	-	-	-	-	-	-	-		U (2)	2	-	-
PB2	348 - 356	NLQTLKIRV	84	I (99)	31	15	14	4	2	1	1	1	1	11	2	4	1	2	1	1	4	1	41	I (98)	90	2	5
		......M..		U (1)	-	-	-	-	-	-	-	-	-	-	1	-	-	-	-	-	-	-		X (0)	-	-	-
		......V..		X (0)	-	-	-	-	-	-	-	-	-	-	-	-	-	-	-	-	-	-		U (2)	2	-	-
PB2	349 - 357	LQTLKIRVH	84	I (99)	31	15	14	4	2	1	1	1	1	11	2	4	1	2	1	1	4	1	41	I (98)	90	2	5
		.....M...		U (1)	-	-	-	-	-	-	-	-	-	-	1	-	-	-	-	-	-	-		X (0)	-	-	-
		.....V...		X (0)	-	-	-	-	-	-	-	-	-	-	-	-	-	-	-	-	-	-		U (2)	2	-	-
PB2	350 - 358	QTLKIRVHE	84	I (99)	31	15	14	4	2	1	1	1	1	11	2	4	1	2	1	1	4	1	41	I (98)	90	2	5
		....M....		U (1)	-	-	-	-	-	-	-	-	-	-	1	-	-	-	-	-	-	-		X (0)	-	-	-
		....V....		X (0)	-	-	-	-	-	-	-	-	-	-	-	-	-	-	-	-	-	-		U (2)	2	-	-
PB2	351 - 359	TLKIRVHEG	84	I (99)	31	15	14	4	2	1	1	1	1	11	2	4	1	2	1	1	4	1	41	I (98)	90	2	5
		...M.....		U (1)	-	-	-	-	-	-	-	-	-	-	1	-	-	-	-	-	-	-		X (0)	-	-	-
		...V.....		X (0)	-	-	-	-	-	-	-	-	-	-	-	-	-	-	-	-	-	-		U (2)	2	-	-
PB2	352 - 360	LKIRVHEGY	84	I (99)	31	15	14	4	2	1	1	1	1	11	2	4	1	2	1	1	4	1	41	I (98)	90	2	5
		..M......		U (1)	-	-	-	-	-	-	-	-	-	-	1	-	-	-	-	-	-	-		X (0)	-	-	-
		..V......		X (0)	-	-	-	-	-	-	-	-	-	-	-	-	-	-	-	-	-	-		U (2)	2	-	-
PB2	353 - 361	KIRVHEGYE	84	I (99)	31	15	14	4	2	1	1	1	1	11	2	4	1	2	1	1	4	1	41	I (98)	90	2	5
		.M.......		U (1)	-	-	-	-	-	-	-	-	-	-	1	-	-	-	-	-	-	-		X (0)	-	-	-
		.V.......		X (0)	-	-	-	-	-	-	-	-	-	-	-	-	-	-	-	-	-	-		U (2)	2	-	-
PB2	354 - 362	IRVHEGYEE	84	I (99)	31	15	14	4	2	1	1	1	1	11	2	4	1	2	1	1	4	1	41	I (98)	90	2	5
		M........		U (1)	-	-	-	-	-	-	-	-	-	-	1	-	-	-	-	-	-	-		X (0)	-	-	-
		V........		X (0)	-	-	-	-	-	-	-	-	-	-	-	-	-	-	-	-	-	-		U (2)	2	-	-
PB2	355 - 363	RVHEGYEEF	84	I (100)	31	15	14	4	2	1	1	1	1	11	4	4	1	2	1	1	4	1	41	I (100)	93	2	5
PB2	356 - 364	VHEGYEEFT	84	I (100)	31	15	14	4	2	1	1	1	1	11	4	4	1	2	1	1	4	1	41	I (100)	93	2	5
PB2	357 - 365	HEGYEEFTM	84	I (100)	31	15	14	4	2	1	1	1	1	11	4	4	1	2	1	1	4	1	41	I (100)	93	2	5
PB2	358 - 366	EGYEEFTMV	84	I (100)	31	15	14	4	2	1	1	1	1	11	4	4	1	2	1	1	4	1	41	I (100)	93	2	5
PB2	359 - 367	GYEEFTMVG	84	I (100)	31	15	14	4	2	1	1	1	1	11	4	4	1	2	1	1	4	1	41	I (100)	93	2	5
PB2	360 - 368	YEEFTMVGR	84	I (98)	31	15	14	4	2	1	1	1	1	11	4	2	-	2	1	1	4	1	41	I (100)	93	2	5
		........K		Ma (2)	-	-	-	-	-	-	-	-	-	-	-	1	1	-	-	-	-	-		X (0)	-	-	-
PB2	361 - 369	EEFTMVGRR	84	I (98)	31	15	14	4	2	1	1	1	1	11	4	2	-	2	1	1	4	1	41	I (100)	93	2	5
		.......K.		Ma (2)	-	-	-	-	-	-	-	-	-	-	-	1	1	-	-	-	-	-		X (0)	-	-	-
PB2	362 - 370	EFTMVGRRA	84	I (98)	31	15	14	4	2	1	1	1	1	11	4	2	-	2	1	1	4	1	41	I (100)	93	2	5
		......K..		Ma (2)	-	-	-	-	-	-	-	-	-	-	-	1	1	-	-	-	-	-		X (0)	-	-	-
PB2	363 - 371	FTMVGRRAT	84	I (98)	31	15	14	4	2	1	1	1	1	11	4	2	-	2	1	1	4	1	41	I (100)	93	2	5
		.....K...		Ma (2)	-	-	-	-	-	-	-	-	-	-	-	1	1	-	-	-	-	-		X (0)	-	-	-
PB2	364 - 372	TMVGRRATA	84	I (98)	31	15	14	4	2	1	1	1	1	11	4	2	-	2	1	1	4	1	41	I (100)	93	2	5
		....K....		Ma (2)	-	-	-	-	-	-	-	-	-	-	-	1	1	-	-	-	-	-		X (0)	-	-	-
PB2	365 - 373	MVGRRATAI	84	I (98)	31	15	14	4	2	1	1	1	1	11	4	2	-	2	1	1	4	1	41	I (100)	93	2	5
		...K.....		Ma (2)	-	-	-	-	-	-	-	-	-	-	-	1	1	-	-	-	-	-		X (0)	-	-	-
PB2	366 - 374	VGRRATAIL	84	I (98)	31	15	14	4	2	1	1	1	1	11	4	2	-	2	1	1	4	1	41	I (100)	93	2	5
		..K.....I		Ma (2)	-	-	-	-	-	-	-	-	-	-	-	1	1	-	-	-	-	-		X (0)	-	-	-
PB2	367 - 375	GRRATAILR	84	I (98)	31	15	14	4	2	1	1	1	1	11	4	2	-	2	1	1	4	1	41	I (100)	93	2	5
		.K.....I.		Ma (2)	-	-	-	-	-	-	-	-	-	-	-	1	1	-	-	-	-	-		X (0)	-	-	-
PB2	368 - 376	RRATAILRK	84	I (98)	31	15	14	4	2	1	1	1	1	11	4	2	-	2	1	1	4	1	41	I (100)	93	2	5
		K.....I..		Ma (2)	-	-	-	-	-	-	-	-	-	-	-	1	1	-	-	-	-	-		X (0)	-	-	-
PB2	369 - 377	RATAILRKA	84	I (98)	31	15	14	4	2	1	1	1	1	11	4	2	-	2	1	1	4	1	41	I (100)	93	2	5
		.....I...		Ma (2)	-	-	-	-	-	-	-	-	-	-	-	1	1	-	-	-	-	-		X (0)	-	-	-
PB2	370 - 378	ATAILRKAT	84	I (98)	31	15	14	4	2	1	1	1	1	11	4	2	-	2	1	1	4	1	41	I (100)	93	2	5
		....I....		Ma (2)	-	-	-	-	-	-	-	-	-	-	-	1	1	-	-	-	-	-		X (0)	-	-	-
PB2	371 - 379	TAILRKATR	84	I (98)	31	15	14	4	2	1	1	1	1	11	4	2	-	2	1	1	4	1	41	I (100)	93	2	5
		...I.....		Ma (2)	-	-	-	-	-	-	-	-	-	-	-	1	1	-	-	-	-	-		X (0)	-	-	-
PB2	372 - 380	AILRKATRR	84	I (98)	31	15	14	4	2	1	1	1	1	11	4	2	-	2	1	1	4	1	41	I (100)	93	2	5
		..I......		Ma (2)	-	-	-	-	-	-	-	-	-	-	-	1	1	-	-	-	-	-		X (0)	-	-	-
PB2	373 - 381	ILRKATRRL	84	I (98)	31	15	14	4	2	1	1	1	1	11	4	2	-	2	1	1	4	1	41	I (100)	93	2	5
		.I.......		Ma (2)	-	-	-	-	-	-	-	-	-	-	-	1	1	-	-	-	-	-		X (0)	-	-	-
PB2	374 - 382	LRKATRRLI	84	I (98)	31	15	14	4	2	1	1	1	1	11	4	2	-	2	1	1	4	1	41	I (100)	93	2	5
		I........		Ma (2)	-	-	-	-	-	-	-	-	-	-	-	1	1	-	-	-	-	-		X (0)	-	-	-
PB2	375 - 383	RKATRRLIQ	84	I (100)	31	15	14	4	2	1	1	1	1	11	4	4	1	2	1	1	4	1	41	I (100)	93	2	5
PB2	376 - 384	KATRRLIQL	84	I (100)	31	15	14	4	2	1	1	1	1	11	4	4	1	2	1	1	4	1	41	I (100)	93	2	5
PB2	377 - 385	ATRRLIQLI	84	I (100)	31	15	14	4	2	1	1	1	1	11	4	4	1	2	1	1	4	1	41	I (100)	93	2	5
PB2	378 - 386	TRRLIQLIV	84	I (100)	31	15	14	4	2	1	1	1	1	11	4	4	1	2	1	1	4	1	41	I (100)	93	2	5
PB2	379 - 387	RRLIQLIVS	84	I (100)	31	15	14	4	2	1	1	1	1	11	4	4	1	2	1	1	4	1	41	I (100)	93	2	5
PB2	380 - 388	RLIQLIVSG	84	I (100)	31	15	14	4	2	1	1	1	1	11	4	4	1	2	1	1	4	1	41	I (100)	93	2	5
PB2	381 - 389	LIQLIVSGR	84	I (58)	-	13	14	-	-	1	-	1	-	11	4	4	1	2	1	1	4	1	41	X (0)	-	-	-
		........K		Ma (42)	31	2	-	4	2	-	1	-	1	-	-	-	-	-	-	-	-	-		I (100)	93	2	5
PB2	382 - 390	IQLIVSGRD	84	I (57)	-	13	13	-	-	1	-	1	-	11	4	4	1	2	1	1	4	1	41	X (0)	-	-	-
		.......K.		Ma (42)	31	2	-	4	2	-	1	-	1	-	-	-	-	-	-	-	-	-		I (100)	93	2	5
		........N		U (1)	-	-	1	-	-	-	-	-	-	-	-	-	-	-	-	-	-	-		X (0)	-	-	-
PB2	383 - 391	QLIVSGRDE	84	I (57)	-	13	13	-	-	1	-	1	-	11	4	4	1	2	1	1	4	1	41	X (0)	-	-	-
		......K..		Ma (39)	29	2	-	4	2	-	1	-	1	-	-	-	-	-	-	-	-	-		I (100)	93	2	5
		......K.G		Mi (2)	2	-	-	-	-	-	-	-	-	-	-	-	-	-	-	-	-	-		X (0)	-	-	-
		.......N.		U (1)	-	-	1	-	-	-	-	-	-	-	-	-	-	-	-	-	-	-		X (0)	-	-	-
PB2	384 - 392	LIVSGRDEQ	84	I (57)	-	13	13	-	-	1	-	1	-	11	4	4	1	2	1	1	4	1	41	X (0)	-	-	-
		.....K...		Ma (39)	29	2	-	4	2	-	1	-	1	-	-	-	-	-	-	-	-	-		I (100)	93	2	5
		.....K.G.		Mi (2)	2	-	-	-	-	-	-	-	-	-	-	-	-	-	-	-	-	-		X (0)	-	-	-
		......N..		U (1)	-	-	1	-	-	-	-	-	-	-	-	-	-	-	-	-	-	-		X (0)	-	-	-
PB2	385 - 393	IVSGRDEQS	84	I (57)	-	13	13	-	-	1	-	1	-	11	4	4	1	2	1	1	4	1	41	X (0)	-	-	-
		....K....		Ma (39)	29	2	-	4	2	-	1	-	1	-	-	-	-	-	-	-	-	-		I (100)	93	2	5
		....K.G..		Mi (2)	2	-	-	-	-	-	-	-	-	-	-	-	-	-	-	-	-	-		X (0)	-	-	-
		.....N...		U (1)	-	-	1	-	-	-	-	-	-	-	-	-	-	-	-	-	-	-		X (0)	-	-	-
PB2	386 - 394	VSGRDEQSI	84	I (57)	-	13	13	-	-	1	-	1	-	11	4	4	1	2	1	1	4	1	41	X (0)	-	-	-
		...K.....		Ma (39)	29	2	-	4	2	-	1	-	1	-	-	-	-	-	-	-	-	-		I (100)	93	2	5
		...K.G...		Mi (2)	2	-	-	-	-	-	-	-	-	-	-	-	-	-	-	-	-	-		X (0)	-	-	-
		....N....		U (1)	-	-	1	-	-	-	-	-	-	-	-	-	-	-	-	-	-	-		X (0)	-	-	-
PB2	387 - 395	SGRDEQSIA	84	I (57)	-	13	13	-	-	1	-	1	-	11	4	4	1	2	1	1	4	1	41	X (0)	-	-	-
		..K......		Ma (39)	29	2	-	4	2	-	1	-	1	-	-	-	-	-	-	-	-	-		I (98)	90	2	5
		..K.G....		Mi (2)	2	-	-	-	-	-	-	-	-	-	-	-	-	-	-	-	-	-		X (0)	-	-	-
		...N.....		U (1)	-	-	1	-	-	-	-	-	-	-	-	-	-	-	-	-	-	-		X (0)	-	-	-
		..K.....S		X (0)	-	-	-	-	-	-	-	-	-	-	-	-	-	-	-	-	-	-		U (2)	2	-	-
PB2	388 - 396	GRDEQSIAE	84	I (57)	-	13	13	-	-	1	-	1	-	11	4	4	1	2	1	1	4	1	41	X (0)	-	-	-
		.K.......		Ma (39)	29	2	-	4	2	-	1	-	1	-	-	-	-	-	-	-	-	-		I (98)	90	2	5
		.K.G.....		Mi (2)	2	-	-	-	-	-	-	-	-	-	-	-	-	-	-	-	-	-		X (0)	-	-	-
		..N......		U (1)	-	-	1	-	-	-	-	-	-	-	-	-	-	-	-	-	-	-		X (0)	-	-	-
		.K.....S.		X (0)	-	-	-	-	-	-	-	-	-	-	-	-	-	-	-	-	-	-		U (2)	2	-	-
PB2	389 - 397	RDEQSIAEA	84	I (57)	-	13	13	-	-	1	-	1	-	11	4	4	1	2	1	1	4	1	41	X (0)	-	-	-
		K........		Ma (39)	29	2	-	4	2	-	1	-	1	-	-	-	-	-	-	-	-	-		I (98)	90	2	5
		K.G......		Mi (2)	2	-	-	-	-	-	-	-	-	-	-	-	-	-	-	-	-	-		X (0)	-	-	-
		.N.......		U (1)	-	-	1	-	-	-	-	-	-	-	-	-	-	-	-	-	-	-		X (0)	-	-	-
		K.....S..		X (0)	-	-	-	-	-	-	-	-	-	-	-	-	-	-	-	-	-	-		U (2)	2	-	-
PB2	390 - 398	DEQSIAEAI	84	I (97)	29	15	13	4	2	1	1	1	1	11	4	4	1	2	1	1	4	1	41	I (98)	90	2	5
		.G.......		Ma (2)	2	-	-	-	-	-	-	-	-	-	-	-	-	-	-	-	-	-		X (0)	-	-	-
		N........		U (1)	-	-	1	-	-	-	-	-	-	-	-	-	-	-	-	-	-	-		X (0)	-	-	-
		.....S...		X (0)	-	-	-	-	-	-	-	-	-	-	-	-	-	-	-	-	-	-		U (2)	2	-	-
PB2	391 - 399	EQSIAEAII	84	I (98)	29	15	14	4	2	1	1	1	1	11	4	4	1	2	1	1	4	1	41	I (98)	90	2	5
		G........		Ma (2)	2	-	-	-	-	-	-	-	-	-	-	-	-	-	-	-	-	-		X (0)	-	-	-
		....S....		X (0)	-	-	-	-	-	-	-	-	-	-	-	-	-	-	-	-	-	-		U (2)	2	-	-
PB2	392 - 400	QSIAEAIIV	84	I (100)	31	15	14	4	2	1	1	1	1	11	4	4	1	2	1	1	4	1	41	I (98)	90	2	5
		...S.....		X (0)	-	-	-	-	-	-	-	-	-	-	-	-	-	-	-	-	-	-		U (2)	2	-	-
PB2	393 - 401	SIAEAIIVA	84	I (100)	31	15	14	4	2	1	1	1	1	11	4	4	1	2	1	1	4	1	41	I (98)	90	2	5
		..S......		X (0)	-	-	-	-	-	-	-	-	-	-	-	-	-	-	-	-	-	-		U (2)	2	-	-
PB2	394 - 402	IAEAIIVAM	84	I (100)	31	15	14	4	2	1	1	1	1	11	4	4	1	2	1	1	4	1	41	I (98)	90	2	5
		.S.......		X (0)	-	-	-	-	-	-	-	-	-	-	-	-	-	-	-	-	-	-		U (2)	2	-	-
PB2	395 - 403	AEAIIVAMV	84	I (100)	31	15	14	4	2	1	1	1	1	11	4	4	1	2	1	1	4	1	41	I (98)	90	2	5
		S........		X (0)	-	-	-	-	-	-	-	-	-	-	-	-	-	-	-	-	-	-		U (2)	2	-	-
PB2	396 - 404	EAIIVAMVF	84	I (100)	31	15	14	4	2	1	1	1	1	11	4	4	1	2	1	1	4	1	41	I (100)	93	2	5
PB2	397 - 405	AIIVAMVFS	84	I (100)	31	15	14	4	2	1	1	1	1	11	4	4	1	2	1	1	4	1	41	I (100)	93	2	5
PB2	398 - 406	IIVAMVFSQ	84	I (100)	31	15	14	4	2	1	1	1	1	11	4	4	1	2	1	1	4	1	41	I (100)	93	2	5
PB2	399 - 407	IVAMVFSQE	84	I (100)	31	15	14	4	2	1	1	1	1	11	4	4	1	2	1	1	4	1	41	I (100)	93	2	5
PB2	400 - 408	VAMVFSQED	84	I (100)	31	15	14	4	2	1	1	1	1	11	4	4	1	2	1	1	4	1	41	I (100)	93	2	5
PB2	401 - 409	AMVFSQEDC	84	I (100)	31	15	14	4	2	1	1	1	1	11	4	4	1	2	1	1	4	1	41	I (100)	93	2	5
PB2	402 - 410	MVFSQEDCM	84	I (100)	31	15	14	4	2	1	1	1	1	11	4	4	1	2	1	1	4	1	41	I (100)	93	2	5
PB2	403 - 411	VFSQEDCMI	84	I (100)	31	15	14	4	2	1	1	1	1	11	4	4	1	2	1	1	4	1	41	I (100)	93	2	5
PB2	404 - 412	FSQEDCMIK	84	I (100)	31	15	14	4	2	1	1	1	1	11	4	4	1	2	1	1	4	1	41	I (100)	93	2	5
PB2	405 - 413	SQEDCMIKA	84	I (100)	31	15	14	4	2	1	1	1	1	11	4	4	1	2	1	1	4	1	41	I (100)	93	2	5
PB2	406 - 414	QEDCMIKAV	84	I (100)	31	15	14	4	2	1	1	1	1	11	4	4	1	2	1	1	4	1	41	I (100)	93	2	5
PB2	407 - 415	EDCMIKAVR	84	I (100)	31	15	14	4	2	1	1	1	1	11	4	4	1	2	1	1	4	1	41	I (100)	93	2	5
PB2	408 - 416	DCMIKAVRG	84	I (100)	31	15	14	4	2	1	1	1	1	11	4	4	1	2	1	1	4	1	41	I (100)	93	2	5
PB2	409 - 417	CMIKAVRGD	84	I (100)	31	15	14	4	2	1	1	1	1	11	4	4	1	2	1	1	4	1	41	I (100)	93	2	5
PB2	410 - 418	MIKAVRGDL	84	I (100)	31	15	14	4	2	1	1	1	1	11	4	4	1	2	1	1	4	1	41	I (100)	93	2	5
PB2	411 - 419	IKAVRGDLN	84	I (100)	31	15	14	4	2	1	1	1	1	11	4	4	1	2	1	1	4	1	41	I (100)	93	2	5
PB2	412 - 420	KAVRGDLNF	84	I (100)	31	15	14	4	2	1	1	1	1	11	4	4	1	2	1	1	4	1	41	I (98)	90	2	5
		........L		X (0)	-	-	-	-	-	-	-	-	-	-	-	-	-	-	-	-	-	-		U (2)	2	-	-
PB2	413 - 421	AVRGDLNFV	84	I (100)	31	15	14	4	2	1	1	1	1	11	4	4	1	2	1	1	4	1	41	I (98)	90	2	5
		.......L.		X (0)	-	-	-	-	-	-	-	-	-	-	-	-	-	-	-	-	-	-		U (2)	2	-	-
PB2	414 - 422	VRGDLNFVN	84	I (100)	31	15	14	4	2	1	1	1	1	11	4	4	1	2	1	1	4	1	41	I (98)	90	2	5
		......L..		X (0)	-	-	-	-	-	-	-	-	-	-	-	-	-	-	-	-	-	-		U (2)	2	-	-
PB2	415 - 423	RGDLNFVNR	84	I (100)	31	15	14	4	2	1	1	1	1	11	4	4	1	2	1	1	4	1	41	I (98)	90	2	5
		.....L...		X (0)	-	-	-	-	-	-	-	-	-	-	-	-	-	-	-	-	-	-		U (2)	2	-	-
PB2	416 - 424	GDLNFVNRA	84	I (100)	31	15	14	4	2	1	1	1	1	11	4	4	1	2	1	1	4	1	41	I (98)	90	2	5
		....L....		X (0)	-	-	-	-	-	-	-	-	-	-	-	-	-	-	-	-	-	-		U (2)	2	-	-
PB2	417 - 425	DLNFVNRAN	84	I (100)	31	15	14	4	2	1	1	1	1	11	4	4	1	2	1	1	4	1	41	I (98)	90	2	5
		...L.....		X (0)	-	-	-	-	-	-	-	-	-	-	-	-	-	-	-	-	-	-		U (2)	2	-	-
PB2	418 - 426	LNFVNRANQ	84	I (99)	31	15	14	4	2	1	1	1	1	11	4	4	1	2	1	1	2	1	41	I (98)	90	2	5
		........H		U (1)	-	-	-	-	-	-	-	-	-	-	-	-	-	-	-	-	1	-		X (0)	-	-	-
		..L......		X (0)	-	-	-	-	-	-	-	-	-	-	-	-	-	-	-	-	-	-		U (2)	2	-	-
PB2	419 - 427	NFVNRANQR	84	I (99)	31	15	14	4	2	1	1	1	1	11	4	4	1	2	1	1	2	1	41	I (98)	90	2	5
		.......H.		U (1)	-	-	-	-	-	-	-	-	-	-	-	-	-	-	-	-	1	-		X (0)	-	-	-
		.L.......		X (0)	-	-	-	-	-	-	-	-	-	-	-	-	-	-	-	-	-	-		U (2)	2	-	-
PB2	420 - 428	FVNRANQRL	84	I (99)	31	15	14	4	2	1	1	1	1	11	4	4	1	2	1	1	2	1	41	I (98)	90	2	5
		......H..		U (1)	-	-	-	-	-	-	-	-	-	-	-	-	-	-	-	-	1	-		X (0)	-	-	-
		L........		X (0)	-	-	-	-	-	-	-	-	-	-	-	-	-	-	-	-	-	-		U (2)	2	-	-
PB2	421 - 429	VNRANQRLN	84	I (99)	31	15	14	4	2	1	1	1	1	11	4	4	1	2	1	1	2	1	41	I (100)	93	2	5
		.....H...		U (1)	-	-	-	-	-	-	-	-	-	-	-	-	-	-	-	-	1	-		X (0)	-	-	-
PB2	422 - 430	NRANQRLNP	84	I (98)	31	15	14	4	2	1	1	1	1	11	4	4	1	2	1	-	2	1	41	I (100)	93	2	5
		........S		U (1)	-	-	-	-	-	-	-	-	-	-	-	-	-	-	-	1	-	-		X (0)	-	-	-
		....H....		U (1)	-	-	-	-	-	-	-	-	-	-	-	-	-	-	-	-	1	-		X (0)	-	-	-
PB2	423 - 431	RANQRLNPM	84	I (98)	31	15	14	4	2	1	1	1	1	11	4	4	1	2	1	-	2	1	41	I (100)	93	2	5
		.......S.		U (1)	-	-	-	-	-	-	-	-	-	-	-	-	-	-	-	1	-	-		X (0)	-	-	-
		...H.....		U (1)	-	-	-	-	-	-	-	-	-	-	-	-	-	-	-	-	1	-		X (0)	-	-	-
PB2	424 - 432	ANQRLNPMH	84	I (98)	31	15	14	4	2	1	1	1	1	11	4	4	1	2	1	-	2	1	41	I (100)	93	2	5
		......S..		U (1)	-	-	-	-	-	-	-	-	-	-	-	-	-	-	-	1	-	-		X (0)	-	-	-
		..H......		U (1)	-	-	-	-	-	-	-	-	-	-	-	-	-	-	-	-	1	-		X (0)	-	-	-
PB2	425 - 433	NQRLNPMHQ	84	I (98)	31	15	14	4	2	1	1	1	1	11	4	4	1	2	1	-	2	1	41	I (100)	93	2	5
		.H.......		U (1)	-	-	-	-	-	-	-	-	-	-	-	-	-	-	-	-	1	-		X (0)	-	-	-
		.....S...		U (1)	-	-	-	-	-	-	-	-	-	-	-	-	-	-	-	1	-	-		X (0)	-	-	-
PB2	426 - 434	QRLNPMHQL	84	I (98)	31	15	14	4	2	1	1	1	1	11	4	4	1	2	1	-	2	1	41	I (100)	93	2	5
		....S....		U (1)	-	-	-	-	-	-	-	-	-	-	-	-	-	-	-	1	-	-		X (0)	-	-	-
		H........		U (1)	-	-	-	-	-	-	-	-	-	-	-	-	-	-	-	-	1	-		X (0)	-	-	-
PB2	427 - 435	RLNPMHQLL	84	I (99)	31	15	14	4	2	1	1	1	1	11	4	4	1	2	1	-	4	1	41	I (100)	93	2	5
		...S.....		U (1)	-	-	-	-	-	-	-	-	-	-	-	-	-	-	-	1	-	-		X (0)	-	-	-
PB2	428 - 436	LNPMHQLLR	84	I (99)	31	15	14	4	2	1	1	1	1	11	4	4	1	2	1	-	4	1	41	I (100)	93	2	5
		..S......		U (1)	-	-	-	-	-	-	-	-	-	-	-	-	-	-	-	1	-	-		X (0)	-	-	-
PB2	429 - 437	NPMHQLLRH	84	I (99)	31	15	14	4	2	1	1	1	1	11	4	4	1	2	1	-	4	1	41	I (100)	93	2	5
		.S.......		U (1)	-	-	-	-	-	-	-	-	-	-	-	-	-	-	-	1	-	-		X (0)	-	-	-
PB2	430 - 438	PMHQLLRHF	84	I (99)	31	15	14	4	2	1	1	1	1	11	4	4	1	2	1	-	4	1	41	I (100)	93	2	5
		S........		U (1)	-	-	-	-	-	-	-	-	-	-	-	-	-	-	-	1	-	-		X (0)	-	-	-
PB2	431 - 439	MHQLLRHFQ	84	I (100)	31	15	14	4	2	1	1	1	1	11	4	4	1	2	1	1	4	1	41	I (100)	93	2	5
PB2	432 - 440	HQLLRHFQK	84	I (100)	31	15	14	4	2	1	1	1	1	11	4	4	1	2	1	1	4	1	41	I (100)	93	2	5
PB2	433 - 441	QLLRHFQKD	84	I (100)	31	15	14	4	2	1	1	1	1	11	4	4	1	2	1	1	4	1	41	I (100)	93	2	5
PB2	434 - 442	LLRHFQKDA	84	I (99)	31	15	14	4	2	1	1	1	1	10	4	4	1	2	1	1	4	1	41	I (100)	93	2	5
		........S		U (1)	-	-	-	-	-	-	-	-	-	1	-	-	-	-	-	-	-	-		X (0)	-	-	-
PB2	435 - 443	LRHFQKDAK	84	I (99)	31	15	14	4	2	1	1	1	1	10	4	4	1	2	1	1	4	1	41	I (100)	93	2	5
		.......S.		U (1)	-	-	-	-	-	-	-	-	-	1	-	-	-	-	-	-	-	-		X (0)	-	-	-
PB2	436 - 444	RHFQKDAKV	84	I (99)	31	15	14	4	2	1	1	1	1	10	4	4	1	2	1	1	4	1	41	I (100)	93	2	5
		......S..		U (1)	-	-	-	-	-	-	-	-	-	1	-	-	-	-	-	-	-	-		X (0)	-	-	-
PB2	437 - 445	HFQKDAKVL	84	I (99)	31	15	14	4	2	1	1	1	1	10	4	4	1	2	1	1	4	1	41	I (100)	93	2	5
		.....S...		U (1)	-	-	-	-	-	-	-	-	-	1	-	-	-	-	-	-	-	-		X (0)	-	-	-
PB2	438 - 446	FQKDAKVLF	84	I (99)	31	15	14	4	2	1	1	1	1	10	4	4	1	2	1	1	4	1	41	I (100)	93	2	5
		....S....		U (1)	-	-	-	-	-	-	-	-	-	1	-	-	-	-	-	-	-	-		X (0)	-	-	-
PB2	439 - 447	QKDAKVLFQ	84	I (98)	30	15	14	4	2	1	1	1	1	10	4	4	1	2	1	1	4	1	41	I (100)	93	2	5
		........H		U (1)	1	-	-	-	-	-	-	-	-	-	-	-	-	-	-	-	-	-		X (0)	-	-	-
		...S.....		U (1)	-	-	-	-	-	-	-	-	-	1	-	-	-	-	-	-	-	-		X (0)	-	-	-
PB2	440 - 448	KDAKVLFQN	83	I (98)	30	16	14	4	2	1	1	1	1	8	4	4	1	2	1	1	4	1	41	I (100)	93	2	5
		..S......		U (1)	-	-	-	-	-	-	-	-	-	1	-	-	-	-	-	-	-	-		X (0)	-	-	-
		.......H.		U (1)	1	-	-	-	-	-	-	-	-	-	-	-	-	-	-	-	-	-		X (0)	-	-	-
PB2	441 - 449	DAKVLFQNW	83	I (98)	30	16	14	4	2	1	1	1	1	8	4	4	1	2	1	1	4	1	41	I (100)	93	2	5
		......H..		U (1)	1	-	-	-	-	-	-	-	-	-	-	-	-	-	-	-	-	-		X (0)	-	-	-
		.S.......		U (1)	-	-	-	-	-	-	-	-	-	1	-	-	-	-	-	-	-	-		X (0)	-	-	-
PB2	442 - 450	AKVLFQNWG	83	I (98)	30	16	14	4	2	1	1	1	1	8	4	4	1	2	1	1	4	1	41	I (100)	93	2	5
		.....H...		U (1)	1	-	-	-	-	-	-	-	-	-	-	-	-	-	-	-	-	-		X (0)	-	-	-
		S........		U (1)	-	-	-	-	-	-	-	-	-	1	-	-	-	-	-	-	-	-		X (0)	-	-	-
PB2	443 - 451	KVLFQNWGI	83	I (98)	30	16	14	4	2	-	1	1	1	10	4	4	1	2	1	1	4	1	41	I (100)	93	2	5
		....H....		U (1)	1	-	-	-	-	-	-	-	-	-	-	-	-	-	-	-	-	-		X (0)	-	-	-
		........V		U (1)	-	-	-	-	-	1	-	-	-	-	-	-	-	-	-	-	-	-		X (0)	-	-	-
PB2	444 - 452	VLFQNWGIE	83	I (98)	30	16	14	4	2	-	1	1	1	10	4	4	1	2	1	1	4	1	41	I (100)	93	2	5
		...H.....		U (1)	1	-	-	-	-	-	-	-	-	-	-	-	-	-	-	-	-	-		X (0)	-	-	-
		.......V.		U (1)	-	-	-	-	-	1	-	-	-	-	-	-	-	-	-	-	-	-		X (0)	-	-	-
PB2	445 - 453	LFQNWGIEP	83	I (98)	30	16	14	4	2	-	1	1	1	10	4	4	1	2	1	1	4	1	41	I (100)	93	2	5
		..H......		U (1)	1	-	-	-	-	-	-	-	-	-	-	-	-	-	-	-	-	-		X (0)	-	-	-
		......V..		U (1)	-	-	-	-	-	1	-	-	-	-	-	-	-	-	-	-	-	-		X (0)	-	-	-
PB2	446 - 454	FQNWGIEPI	83	I (98)	30	16	14	4	2	-	1	1	1	10	4	4	1	2	1	1	4	1	41	I (100)	93	2	5
		.....V...		U (1)	-	-	-	-	-	1	-	-	-	-	-	-	-	-	-	-	-	-		X (0)	-	-	-
		.H.......		U (1)	1	-	-	-	-	-	-	-	-	-	-	-	-	-	-	-	-	-		X (0)	-	-	-
PB2	447 - 455	QNWGIEPID	83	I (98)	30	16	14	4	2	-	1	1	1	10	4	4	1	2	1	1	4	1	41	I (100)	93	2	5
		....V....		U (1)	-	-	-	-	-	1	-	-	-	-	-	-	-	-	-	-	-	-		X (0)	-	-	-
		H........		U (1)	1	-	-	-	-	-	-	-	-	-	-	-	-	-	-	-	-	-		X (0)	-	-	-
PB2	448 - 456	NWGIEPIDN	83	I (99)	31	16	14	4	2	-	1	1	1	10	4	4	1	2	1	1	4	1	41	I (100)	93	2	5
		...V.....		U (1)	-	-	-	-	-	1	-	-	-	-	-	-	-	-	-	-	-	-		X (0)	-	-	-
PB2	449 - 457	WGIEPIDNV	84	I (98)	30	15	14	4	2	-	1	1	1	11	4	4	1	2	1	1	4	1	41	I (100)	93	2	5
		........I		U (1)	1	-	-	-	-	-	-	-	-	-	-	-	-	-	-	-	-	-		X (0)	-	-	-
		..V......		U (1)	-	-	-	-	-	1	-	-	-	-	-	-	-	-	-	-	-	-		X (0)	-	-	-
PB2	450 - 458	GIEPIDNVM	84	I (98)	30	15	14	4	2	-	1	1	1	11	4	4	1	2	1	1	4	1	41	I (100)	93	2	5
		.......I.		U (1)	1	-	-	-	-	-	-	-	-	-	-	-	-	-	-	-	-	-		X (0)	-	-	-
		.V.......		U (1)	-	-	-	-	-	1	-	-	-	-	-	-	-	-	-	-	-	-		X (0)	-	-	-
PB2	451 - 459	IEPIDNVMG	84	I (98)	30	15	14	4	2	-	1	1	1	11	4	4	1	2	1	1	4	1	41	I (100)	93	2	5
		V........		U (1)	-	-	-	-	-	1	-	-	-	-	-	-	-	-	-	-	-	-		X (0)	-	-	-
		......I..		U (1)	1	-	-	-	-	-	-	-	-	-	-	-	-	-	-	-	-	-		X (0)	-	-	-
PB2	452 - 460	EPIDNVMGM	84	I (99)	30	15	14	4	2	1	1	1	1	11	4	4	1	2	1	1	4	1	41	I (100)	93	2	5
		.....I...		U (1)	1	-	-	-	-	-	-	-	-	-	-	-	-	-	-	-	-	-		X (0)	-	-	-
PB2	453 - 461	PIDNVMGMI	84	I (99)	30	15	14	4	2	1	1	1	1	11	4	4	1	2	1	1	4	1	41	I (100)	93	2	5
		....I....		U (1)	1	-	-	-	-	-	-	-	-	-	-	-	-	-	-	-	-	-		X (0)	-	-	-
PB2	454 - 462	IDNVMGMIG	84	I (99)	30	15	14	4	2	1	1	1	1	11	4	4	1	2	1	1	4	1	41	I (100)	93	2	5
		...I.....		U (1)	1	-	-	-	-	-	-	-	-	-	-	-	-	-	-	-	-	-		X (0)	-	-	-
PB2	455 - 463	DNVMGMIGI	84	I (99)	30	15	14	4	2	1	1	1	1	11	4	4	1	2	1	1	4	1	41	I (100)	93	2	5
		..I......		U (1)	1	-	-	-	-	-	-	-	-	-	-	-	-	-	-	-	-	-		X (0)	-	-	-
PB2	456 - 464	NVMGMIGIL	84	I (99)	30	15	14	4	2	1	1	1	1	11	4	4	1	2	1	1	4	1	41	I (100)	93	2	5
		.I.......		U (1)	1	-	-	-	-	-	-	-	-	-	-	-	-	-	-	-	-	-		X (0)	-	-	-
PB2	457 - 465	VMGMIGILP	84	I (99)	30	15	14	4	2	1	1	1	1	11	4	4	1	2	1	1	4	1	41	I (100)	93	2	5
		I........		U (1)	1	-	-	-	-	-	-	-	-	-	-	-	-	-	-	-	-	-		X (0)	-	-	-
PB2	458 - 466	MGMIGILPD	84	I (100)	31	15	14	4	2	1	1	1	1	11	4	4	1	2	1	1	4	1	41	I (100)	93	2	5
PB2	459 - 467	GMIGILPDM	84	I (100)	31	15	14	4	2	1	1	1	1	11	4	4	1	2	1	1	4	1	41	I (100)	93	2	5
PB2	460 - 468	MIGILPDMT	84	I (99)	30	15	14	4	2	1	1	1	1	11	4	4	1	2	1	1	4	1	41	I (100)	93	2	5
		........A		U (1)	1	-	-	-	-	-	-	-	-	-	-	-	-	-	-	-	-	-		X (0)	-	-	-
PB2	461 - 469	IGILPDMTP	84	I (99)	30	15	14	4	2	1	1	1	1	11	4	4	1	2	1	1	4	1	41	I (100)	93	2	5
		.......A.		U (1)	1	-	-	-	-	-	-	-	-	-	-	-	-	-	-	-	-	-		X (0)	-	-	-
PB2	462 - 470	GILPDMTPS	84	I (97)	30	15	13	4	2	1	1	1	1	10	4	4	1	2	1	1	4	1	41	I (100)	93	2	5
		......A..		U (1)	1	-	-	-	-	-	-	-	-	-	-	-	-	-	-	-	-	-		X (0)	-	-	-
		........T		U (1)	-	-	1	-	-	-	-	-	-	-	-	-	-	-	-	-	-	-		X (0)	-	-	-
		........N		U (1)	-	-	-	-	-	-	-	-	-	1	-	-	-	-	-	-	-	-		X (0)	-	-	-
PB2	463 - 471	ILPDMTPST	84	I (97)	30	15	13	4	2	1	1	1	1	10	4	4	1	2	1	1	4	1	41	I (100)	93	2	5
		.......N.		U (1)	-	-	-	-	-	-	-	-	-	1	-	-	-	-	-	-	-	-		X (0)	-	-	-
		.....A..A		U (1)	1	-	-	-	-	-	-	-	-	-	-	-	-	-	-	-	-	-		X (0)	-	-	-
		.......TP		U (1)	-	-	1	-	-	-	-	-	-	-	-	-	-	-	-	-	-	-		X (0)	-	-	-
PB2	464 - 472	LPDMTPSTE	83	I (94)	30	16	12	4	2	1	1	1	1	10	2	4	1	1	1	1	4	1	41	I (100)	93	2	5
		........D		Ma (2)	-	-	1	-	-	-	-	-	-	-	-	-	-	1	-	-	-	-		X (0)	-	-	-
		....A..A.		U (1)	1	-	-	-	-	-	-	-	-	-	-	-	-	-	-	-	-	-		X (0)	-	-	-
		......TP.		U (1)	-	-	1	-	-	-	-	-	-	-	-	-	-	-	-	-	-	-		X (0)	-	-	-
		......N..		U (1)	-	-	-	-	-	-	-	-	-	1	-	-	-	-	-	-	-	-		X (0)	-	-	-
PB2	465 - 473	PDMTPSTEM	83	I (93)	29	16	12	4	2	1	1	1	1	10	2	4	1	1	1	1	4	1	41	I (100)	93	2	5
		.......D.		Ma (2)	-	-	1	-	-	-	-	-	-	-	-	-	-	1	-	-	-	-		X (0)	-	-	-
		........V		U (1)	1	-	-	-	-	-	-	-	-	-	-	-	-	-	-	-	-	-		X (0)	-	-	-
		...A..A..		U (1)	1	-	-	-	-	-	-	-	-	-	-	-	-	-	-	-	-	-		X (0)	-	-	-
		.....N...		U (1)	-	-	-	-	-	-	-	-	-	1	-	-	-	-	-	-	-	-		X (0)	-	-	-
		.....TP..		U (1)	-	-	1	-	-	-	-	-	-	-	-	-	-	-	-	-	-	-		X (0)	-	-	-
PB2	466 - 474	DMTPSTEMS	83	I (93)	29	16	12	4	2	1	1	1	1	10	2	4	1	1	1	1	4	1	41	I (100)	93	2	5
		......D..		Ma (2)	-	-	1	-	-	-	-	-	-	-	-	-	-	1	-	-	-	-		X (0)	-	-	-
		..A..A...		U (1)	1	-	-	-	-	-	-	-	-	-	-	-	-	-	-	-	-	-		X (0)	-	-	-
		....N....		U (1)	-	-	-	-	-	-	-	-	-	1	-	-	-	-	-	-	-	-		X (0)	-	-	-
		....TP...		U (1)	-	-	1	-	-	-	-	-	-	-	-	-	-	-	-	-	-	-		X (0)	-	-	-
		.......V.		U (1)	1	-	-	-	-	-	-	-	-	-	-	-	-	-	-	-	-	-		X (0)	-	-	-
PB2	467 - 475	MTPSTEMSL	83	I (93)	29	16	12	4	2	1	1	1	1	10	2	4	1	1	1	1	4	1	41	I (100)	93	2	5
		.....D...		Ma (2)	-	-	1	-	-	-	-	-	-	-	-	-	-	1	-	-	-	-		X (0)	-	-	-
		......V..		U (1)	1	-	-	-	-	-	-	-	-	-	-	-	-	-	-	-	-	-		X (0)	-	-	-
		...TP....		U (1)	-	-	1	-	-	-	-	-	-	-	-	-	-	-	-	-	-	-		X (0)	-	-	-
		...N.....		U (1)	-	-	-	-	-	-	-	-	-	1	-	-	-	-	-	-	-	-		X (0)	-	-	-
		.A..A....		U (1)	1	-	-	-	-	-	-	-	-	-	-	-	-	-	-	-	-	-		X (0)	-	-	-
PB2	468 - 476	TPSTEMSLR	83	I (93)	29	16	12	4	2	1	1	1	1	10	2	4	1	1	1	1	4	1	41	I (100)	93	2	5
		....D....		Ma (2)	-	-	1	-	-	-	-	-	-	-	-	-	-	1	-	-	-	-		X (0)	-	-	-
		A..A.....		U (1)	1	-	-	-	-	-	-	-	-	-	-	-	-	-	-	-	-	-		X (0)	-	-	-
		..N......		U (1)	-	-	-	-	-	-	-	-	-	1	-	-	-	-	-	-	-	-		X (0)	-	-	-
		.....V...		U (1)	1	-	-	-	-	-	-	-	-	-	-	-	-	-	-	-	-	-		X (0)	-	-	-
		..TP.....		U (1)	-	-	1	-	-	-	-	-	-	-	-	-	-	-	-	-	-	-		X (0)	-	-	-
PB2	469 - 477	PSTEMSLRG	83	I (93)	29	16	12	4	2	1	1	1	1	10	2	4	1	1	1	1	4	1	41	I (100)	93	2	5
		...D.....		Ma (2)	-	-	1	-	-	-	-	-	-	-	-	-	-	1	-	-	-	-		X (0)	-	-	-
		....V....		U (1)	1	-	-	-	-	-	-	-	-	-	-	-	-	-	-	-	-	-		X (0)	-	-	-
		.TP......		U (1)	-	-	1	-	-	-	-	-	-	-	-	-	-	-	-	-	-	-		X (0)	-	-	-
		.N.......		U (1)	-	-	-	-	-	-	-	-	-	1	-	-	-	-	-	-	-	-		X (0)	-	-	-
		..A......		U (1)	1	-	-	-	-	-	-	-	-	-	-	-	-	-	-	-	-	-		X (0)	-	-	-
PB2	470 - 478	STEMSLRGV	83	I (75)	29	16	12	4	2	1	1	1	1	-	-	2	-	-	-	-	4	1	41	I (100)	93	2	5
		........I		Ma (18)	-	-	-	-	-	-	-	-	-	10	2	1	1	1	1	1	-	-		X (0)	-	-	-
		N.......I		U (1)	-	-	-	-	-	-	-	-	-	1	-	-	-	-	-	-	-	-		X (0)	-	-	-
		.A.......		U (1)	1	-	-	-	-	-	-	-	-	-	-	-	-	-	-	-	-	-		X (0)	-	-	-
		...V.....		U (1)	1	-	-	-	-	-	-	-	-	-	-	-	-	-	-	-	-	-		X (0)	-	-	-
		..D......		U (1)	-	-	1	-	-	-	-	-	-	-	-	-	-	-	-	-	-	-		X (0)	-	-	-
		..D.....I		U (1)	-	-	-	-	-	-	-	-	-	-	-	-	-	1	-	-	-	-		X (0)	-	-	-
		TP.......		U (1)	-	-	1	-	-	-	-	-	-	-	-	-	-	-	-	-	-	-		X (0)	-	-	-
PB2	471 - 479	TEMSLRGVR	83	I (75)	29	16	12	4	2	1	1	1	1	-	-	2	-	-	-	-	4	1	41	I (100)	93	2	5
		.......I.		Ma (19)	-	-	-	-	-	-	-	-	-	11	2	1	1	1	1	1	-	-		X (0)	-	-	-
		..V......		U (1)	1	-	-	-	-	-	-	-	-	-	-	-	-	-	-	-	-	-		X (0)	-	-	-
		P........		U (1)	-	-	1	-	-	-	-	-	-	-	-	-	-	-	-	-	-	-		X (0)	-	-	-
		.D.......		U (1)	-	-	1	-	-	-	-	-	-	-	-	-	-	-	-	-	-	-		X (0)	-	-	-
		A........		U (1)	1	-	-	-	-	-	-	-	-	-	-	-	-	-	-	-	-	-		X (0)	-	-	-
		.D.....I.		U (1)	-	-	-	-	-	-	-	-	-	-	-	-	-	1	-	-	-	-		X (0)	-	-	-
PB2	472 - 480	EMSLRGVRV	83	I (77)	30	16	13	4	2	1	1	1	1	-	-	2	-	-	-	-	4	1	41	I (100)	93	2	5
		......I..		Ma (19)	-	-	-	-	-	-	-	-	-	11	2	1	1	1	1	1	-	-		X (0)	-	-	-
		D.....I..		U (1)	-	-	-	-	-	-	-	-	-	-	-	-	-	1	-	-	-	-		X (0)	-	-	-
		.V.......		U (1)	1	-	-	-	-	-	-	-	-	-	-	-	-	-	-	-	-	-		X (0)	-	-	-
		D........		U (1)	-	-	1	-	-	-	-	-	-	-	-	-	-	-	-	-	-	-		X (0)	-	-	-
PB2	473 - 481	MSLRGVRVS	84	I (77)	30	15	14	4	2	1	1	1	1	-	-	2	-	-	-	-	4	1	41	I (100)	93	2	5
		.....I...		Ma (21)	-	-	-	-	-	-	-	-	-	11	4	1	1	2	1	1	-	-		X (0)	-	-	-
		V........		U (1)	1	-	-	-	-	-	-	-	-	-	-	-	-	-	-	-	-	-		X (0)	-	-	-
PB2	474 - 482	SLRGVRVSK	84	I (79)	31	15	14	4	2	1	1	1	1	-	-	2	-	-	-	-	4	1	41	I (100)	93	2	5
		....I....		Ma (21)	-	-	-	-	-	-	-	-	-	11	4	1	1	2	1	1	-	-		X (0)	-	-	-
PB2	475 - 483	LRGVRVSKM	84	I (79)	31	15	14	4	2	1	1	1	1	-	-	2	-	-	-	-	4	1	41	I (100)	93	2	5
		...I.....		Ma (21)	-	-	-	-	-	-	-	-	-	11	4	1	1	2	1	1	-	-		X (0)	-	-	-
PB2	476 - 484	RGVRVSKMG	84	I (79)	31	15	14	4	2	1	1	1	1	-	-	2	-	-	-	-	4	1	41	I (100)	93	2	5
		..I......		Ma (21)	-	-	-	-	-	-	-	-	-	11	4	1	1	2	1	1	-	-		X (0)	-	-	-
PB2	477 - 485	GVRVSKMGV	84	I (79)	31	15	14	4	2	1	1	1	1	-	-	2	-	-	-	-	4	1	41	I (100)	93	2	5
		.I.......		Ma (21)	-	-	-	-	-	-	-	-	-	11	4	1	1	2	1	1	-	-		X (0)	-	-	-
PB2	478 - 486	VRVSKMGVD	84	I (79)	31	15	14	4	2	1	1	1	1	-	-	2	-	-	-	-	4	1	41	I (100)	93	2	5
		I........		Ma (21)	-	-	-	-	-	-	-	-	-	11	4	1	1	2	1	1	-	-		X (0)	-	-	-
PB2	479 - 487	RVSKMGVDE	84	I (100)	31	15	14	4	2	1	1	1	1	11	4	4	1	2	1	1	4	1	41	I (100)	93	2	5
PB2	480 - 488	VSKMGVDEY	84	I (100)	31	15	14	4	2	1	1	1	1	11	4	4	1	2	1	1	4	1	41	I (100)	93	2	5
PB2	481 - 489	SKMGVDEYS	84	I (100)	31	15	14	4	2	1	1	1	1	11	4	4	1	2	1	1	4	1	41	I (100)	93	2	5
PB2	482 - 490	KMGVDEYSS	84	I (99)	31	15	14	4	2	1	1	1	1	11	4	2	1	2	1	1	4	1	41	I (100)	93	2	5
		........N		U (1)	-	-	-	-	-	-	-	-	-	-	-	1	-	-	-	-	-	-		X (0)	-	-	-
PB2	483 - 491	MGVDEYSST	84	I (97)	31	15	14	4	2	1	1	1	1	11	4	-	1	2	1	1	4	1	41	I (100)	93	2	5
		........A		Ma (2)	-	-	-	-	-	-	-	-	-	-	-	2	-	-	-	-	-	-		X (0)	-	-	-
		.......N.		U (1)	-	-	-	-	-	-	-	-	-	-	-	1	-	-	-	-	-	-		X (0)	-	-	-
PB2	484 - 492	GVDEYSSTE	83	I (96)	31	16	14	4	2	1	1	1	1	10	4	-	1	2	1	1	4	1	41	I (100)	93	2	5
		.......A.		Ma (2)	-	-	-	-	-	-	-	-	-	-	-	2	-	-	-	-	-	-		X (0)	-	-	-
		......N..		U (1)	-	-	-	-	-	-	-	-	-	-	-	1	-	-	-	-	-	-		X (0)	-	-	-
PB2	485 - 493	VDEYSSTER	83	I (96)	31	16	14	4	2	1	1	1	1	10	4	-	1	2	1	1	4	1	41	I (100)	93	2	5
		......A..		Ma (2)	-	-	-	-	-	-	-	-	-	-	-	2	-	-	-	-	-	-		X (0)	-	-	-
		.....N...		U (1)	-	-	-	-	-	-	-	-	-	-	-	1	-	-	-	-	-	-		X (0)	-	-	-
PB2	486 - 494	DEYSSTERV	82	I (96)	32	16	15	4	2	1	1	1	1	9	4	-	1	2	1	1	4	1	41	I (100)	93	2	5
		.....A...		Ma (2)	-	-	-	-	-	-	-	-	-	-	-	2	-	-	-	-	-	-		X (0)	-	-	-
		....N....		U (1)	-	-	-	-	-	-	-	-	-	-	-	1	-	-	-	-	-	-		X (0)	-	-	-
PB2	487 - 495	EYSSTERVV	82	I (96)	32	16	15	4	2	1	1	1	1	9	4	-	1	2	1	1	4	1	41	I (100)	93	2	5
		....A....		Ma (2)	-	-	-	-	-	-	-	-	-	-	-	2	-	-	-	-	-	-		X (0)	-	-	-
		...N.....		U (1)	-	-	-	-	-	-	-	-	-	-	-	1	-	-	-	-	-	-		X (0)	-	-	-
PB2	488 - 496	YSSTERVVV	82	I (96)	32	16	15	4	2	1	1	1	1	9	4	-	1	2	1	1	4	1	41	I (100)	93	2	5
		...A.....		Ma (2)	-	-	-	-	-	-	-	-	-	-	-	2	-	-	-	-	-	-		X (0)	-	-	-
		..N......		U (1)	-	-	-	-	-	-	-	-	-	-	-	1	-	-	-	-	-	-		X (0)	-	-	-
PB2	489 - 497	SSTERVVVS	82	I (96)	32	16	15	4	2	1	1	1	1	9	4	-	1	2	1	1	4	1	41	I (100)	93	2	5
		..A......		Ma (2)	-	-	-	-	-	-	-	-	-	-	-	2	-	-	-	-	-	-		X (0)	-	-	-
		.N.......		U (1)	-	-	-	-	-	-	-	-	-	-	-	1	-	-	-	-	-	-		X (0)	-	-	-
PB2	490 - 498	STERVVVSI	82	I (96)	32	16	15	4	2	1	1	1	1	9	4	-	1	2	1	1	4	1	41	I (100)	93	2	5
		.A.......		Ma (2)	-	-	-	-	-	-	-	-	-	-	-	2	-	-	-	-	-	-		X (0)	-	-	-
		N........		U (1)	-	-	-	-	-	-	-	-	-	-	-	1	-	-	-	-	-	-		X (0)	-	-	-
PB2	491 - 499	TERVVVSID	82	I (98)	32	16	15	4	2	1	1	1	1	9	4	1	1	2	1	1	4	1	41	I (100)	93	2	5
		A........		Ma (2)	-	-	-	-	-	-	-	-	-	-	-	2	-	-	-	-	-	-		X (0)	-	-	-
PB2	492 - 500	ERVVVSIDR	82	I (100)	32	16	15	4	2	1	1	1	1	9	4	4	1	2	1	1	4	1	41	I (100)	93	2	5
PB2	493 - 501	RVVVSIDRF	82	I (100)	32	16	15	4	2	1	1	1	1	9	4	4	1	2	1	1	4	1	41	I (100)	93	2	5
PB2	494 - 502	VVVSIDRFL	82	I (100)	32	16	15	4	2	1	1	1	1	9	4	4	1	2	1	1	4	1	41	I (100)	93	2	5
PB2	495 - 503	VVSIDRFLR	82	I (100)	32	16	15	4	2	1	1	1	1	9	4	4	1	2	1	1	4	1	41	I (100)	93	2	5
PB2	496 - 504	VSIDRFLRV	82	I (100)	32	16	15	4	2	1	1	1	1	9	4	4	1	2	1	1	4	1	41	I (100)	93	2	5
PB2	497 - 505	SIDRFLRVR	82	I (100)	32	16	15	4	2	1	1	1	1	9	4	4	1	2	1	1	4	1	41	I (100)	93	2	5
PB2	498 - 506	IDRFLRVRD	82	I (100)	32	16	15	4	2	1	1	1	1	9	4	4	1	2	1	1	4	1	41	I (100)	93	2	5
PB2	499 - 507	DRFLRVRDQ	82	I (99)	32	16	15	4	2	1	1	1	1	9	2	4	1	2	1	1	4	1	41	I (100)	93	2	5
		........H		U (1)	-	-	-	-	-	-	-	-	-	-	1	-	-	-	-	-	-	-		X (0)	-	-	-
PB2	500 - 508	RFLRVRDQR	82	I (99)	32	16	15	4	2	1	1	1	1	9	2	4	1	2	1	1	4	1	41	I (100)	93	2	5
		.......H.		U (1)	-	-	-	-	-	-	-	-	-	-	1	-	-	-	-	-	-	-		X (0)	-	-	-
PB2	501 - 509	FLRVRDQRG	82	I (99)	32	16	15	4	2	1	1	1	1	9	2	4	1	2	1	1	4	1	41	I (100)	93	2	5
		......H..		U (1)	-	-	-	-	-	-	-	-	-	-	1	-	-	-	-	-	-	-		X (0)	-	-	-
PB2	502 - 510	LRVRDQRGN	82	I (99)	32	16	15	4	2	1	1	1	1	9	2	4	1	2	1	1	4	1	41	I (100)	93	2	5
		.....H...		U (1)	-	-	-	-	-	-	-	-	-	-	1	-	-	-	-	-	-	-		X (0)	-	-	-
PB2	503 - 511	RVRDQRGNV	82	I (94)	28	16	13	4	2	1	1	1	1	9	2	4	1	2	1	1	4	1	41	I (98)	90	2	5
		........I		Ma (5)	4	-	1	-	-	-	-	-	-	-	-	-	-	-	-	-	-	-		U (2)	2	-	-
		....H....		U (1)	-	-	-	-	-	-	-	-	-	-	1	-	-	-	-	-	-	-		X (0)	-	-	-
PB2	504 - 512	VRDQRGNVL	82	I (94)	28	16	13	4	2	1	1	1	1	9	2	4	1	2	1	1	4	1	41	I (98)	90	2	5
		.......I.		Ma (5)	4	-	1	-	-	-	-	-	-	-	-	-	-	-	-	-	-	-		U (2)	2	-	-
		...H.....		U (1)	-	-	-	-	-	-	-	-	-	-	1	-	-	-	-	-	-	-		X (0)	-	-	-
PB2	505 - 513	RDQRGNVLL	81	I (94)	28	16	14	4	2	1	1	1	1	7	2	4	1	2	1	1	4	1	41	I (98)	90	2	5
		......I..		Ma (5)	4	-	1	-	-	-	-	-	-	-	-	-	-	-	-	-	-	-		U (2)	2	-	-
		..H......		U (1)	-	-	-	-	-	-	-	-	-	-	1	-	-	-	-	-	-	-		X (0)	-	-	-
PB2	506 - 514	DQRGNVLLS	81	I (94)	28	16	14	4	2	1	1	1	1	7	2	4	1	2	1	1	4	1	41	I (98)	90	2	5
		.....I...		Ma (5)	4	-	1	-	-	-	-	-	-	-	-	-	-	-	-	-	-	-		U (2)	2	-	-
		.H.......		U (1)	-	-	-	-	-	-	-	-	-	-	1	-	-	-	-	-	-	-		X (0)	-	-	-
PB2	507 - 515	QRGNVLLSP	81	I (94)	28	16	14	4	2	1	1	1	1	7	2	4	1	2	1	1	4	1	41	I (98)	90	2	5
		....I....		Ma (5)	4	-	1	-	-	-	-	-	-	-	-	-	-	-	-	-	-	-		U (2)	2	-	-
		H........		U (1)	-	-	-	-	-	-	-	-	-	-	1	-	-	-	-	-	-	-		X (0)	-	-	-
PB2	508 - 516	RGNVLLSPE	81	I (95)	28	16	14	4	2	1	1	1	1	7	4	4	1	2	1	1	4	1	41	I (98)	90	2	5
		...I.....		Ma (5)	4	-	1	-	-	-	-	-	-	-	-	-	-	-	-	-	-	-		U (2)	2	-	-
PB2	509 - 517	GNVLLSPEE	81	I (95)	28	16	14	4	2	1	1	1	1	7	4	4	1	2	1	1	4	1	41	I (98)	90	2	5
		..I......		Ma (5)	4	-	1	-	-	-	-	-	-	-	-	-	-	-	-	-	-	-		U (2)	2	-	-
PB2	510 - 518	NVLLSPEEV	81	I (95)	28	16	14	4	2	1	1	1	1	7	4	4	1	2	1	1	4	1	41	I (98)	90	2	5
		.I.......		Ma (5)	4	-	1	-	-	-	-	-	-	-	-	-	-	-	-	-	-	-		U (2)	2	-	-
PB2	511 - 519	VLLSPEEVS	81	I (95)	28	16	14	4	2	1	1	1	1	7	4	4	1	2	1	1	4	1	41	I (98)	90	2	5
		I........		Ma (5)	4	-	1	-	-	-	-	-	-	-	-	-	-	-	-	-	-	-		U (2)	2	-	-
PB2	512 - 520	LLSPEEVSE	81	I (100)	32	16	15	4	2	1	1	1	1	7	4	4	1	2	1	1	4	1	41	I (100)	93	2	5
PB2	513 - 521	LSPEEVSET	81	I (100)	32	16	15	4	2	1	1	1	1	7	4	4	1	2	1	1	4	1	41	I (98)	90	2	5
		........I		X (0)	-	-	-	-	-	-	-	-	-	-	-	-	-	-	-	-	-	-		U (2)	2	-	-
PB2	514 - 522	SPEEVSETQ	81	I (100)	32	16	15	4	2	1	1	1	1	7	4	4	1	2	1	1	4	1	41	I (98)	90	2	5
		.......I.		X (0)	-	-	-	-	-	-	-	-	-	-	-	-	-	-	-	-	-	-		U (2)	2	-	-
PB2	515 - 523	PEEVSETQG	81	I (100)	32	16	15	4	2	1	1	1	1	7	4	4	1	2	1	1	4	1	41	I (98)	90	2	5
		......I..		X (0)	-	-	-	-	-	-	-	-	-	-	-	-	-	-	-	-	-	-		U (2)	2	-	-
PB2	516 - 524	EEVSETQGT	81	I (96)	32	16	15	4	2	1	1	1	1	7	4	1	1	1	1	1	4	1	41	I (98)	90	2	5
		........I		Ma (4)	-	-	-	-	-	-	-	-	-	-	-	2	-	1	-	-	-	-		X (0)	-	-	-
		.....I...		X (0)	-	-	-	-	-	-	-	-	-	-	-	-	-	-	-	-	-	-		U (2)	2	-	-
PB2	517 - 525	EVSETQGTE	81	I (96)	32	16	15	4	2	1	1	1	1	7	4	1	1	1	1	1	4	1	41	I (98)	90	2	5
		.......I.		Ma (4)	-	-	-	-	-	-	-	-	-	-	-	2	-	1	-	-	-	-		X (0)	-	-	-
		....I....		X (0)	-	-	-	-	-	-	-	-	-	-	-	-	-	-	-	-	-	-		U (2)	2	-	-
PB2	518 - 526	VSETQGTEK	81	I (96)	32	16	15	4	2	1	1	1	1	7	4	1	1	1	1	1	4	1	41	I (93)	85	2	5
		......I..		Ma (4)	-	-	-	-	-	-	-	-	-	-	-	2	-	1	-	-	-	-		X (0)	-	-	-
		........R		X (0)	-	-	-	-	-	-	-	-	-	-	-	-	-	-	-	-	-	-		Ma (5)	5	-	-
		...I.....		X (0)	-	-	-	-	-	-	-	-	-	-	-	-	-	-	-	-	-	-		U (2)	2	-	-
PB2	519 - 527	SETQGTEKL	81	I (96)	32	16	15	4	2	1	1	1	1	7	4	1	1	1	1	1	4	1	41	I (93)	85	2	5
		.....I...		Ma (4)	-	-	-	-	-	-	-	-	-	-	-	2	-	1	-	-	-	-		X (0)	-	-	-
		.......R.		X (0)	-	-	-	-	-	-	-	-	-	-	-	-	-	-	-	-	-	-		Ma (5)	5	-	-
		..I......		X (0)	-	-	-	-	-	-	-	-	-	-	-	-	-	-	-	-	-	-		U (2)	2	-	-
PB2	520 - 528	ETQGTEKLT	81	I (96)	32	16	15	4	2	1	1	1	1	7	4	1	1	1	1	1	4	1	41	I (93)	85	2	5
		....I....		Ma (4)	-	-	-	-	-	-	-	-	-	-	-	2	-	1	-	-	-	-		X (0)	-	-	-
		......R..		X (0)	-	-	-	-	-	-	-	-	-	-	-	-	-	-	-	-	-	-		Ma (5)	5	-	-
		.I.......		X (0)	-	-	-	-	-	-	-	-	-	-	-	-	-	-	-	-	-	-		U (2)	2	-	-
PB2	521 - 529	TQGTEKLTI	81	I (96)	32	16	15	4	2	1	1	1	1	7	4	1	1	1	1	1	4	1	41	I (93)	85	2	5
		...I.....		Ma (4)	-	-	-	-	-	-	-	-	-	-	-	2	-	1	-	-	-	-		X (0)	-	-	-
		.....R...		X (0)	-	-	-	-	-	-	-	-	-	-	-	-	-	-	-	-	-	-		Ma (5)	5	-	-
		I........		X (0)	-	-	-	-	-	-	-	-	-	-	-	-	-	-	-	-	-	-		U (2)	2	-	-
PB2	522 - 530	QGTEKLTIT	81	I (96)	32	16	15	4	2	1	1	1	1	7	4	1	1	1	1	1	4	1	41	I (95)	88	2	5
		..I......		Ma (4)	-	-	-	-	-	-	-	-	-	-	-	2	-	1	-	-	-	-		X (0)	-	-	-
		....R....		X (0)	-	-	-	-	-	-	-	-	-	-	-	-	-	-	-	-	-	-		Ma (5)	5	-	-
PB2	523 - 531	GTEKLTITY	81	I (96)	32	16	15	4	2	1	1	1	1	7	4	1	1	1	1	1	4	1	41	I (95)	88	2	5
		.I.......		Ma (4)	-	-	-	-	-	-	-	-	-	-	-	2	-	1	-	-	-	-		X (0)	-	-	-
		...R.....		X (0)	-	-	-	-	-	-	-	-	-	-	-	-	-	-	-	-	-	-		Ma (5)	5	-	-
PB2	524 - 532	TEKLTITYS	81	I (96)	32	16	15	4	2	1	1	1	1	7	4	1	1	1	1	1	4	1	41	I (95)	88	2	5
		I........		Ma (4)	-	-	-	-	-	-	-	-	-	-	-	2	-	1	-	-	-	-		X (0)	-	-	-
		..R......		X (0)	-	-	-	-	-	-	-	-	-	-	-	-	-	-	-	-	-	-		Ma (5)	5	-	-
PB2	525 - 533	EKLTITYSS	81	I (100)	32	16	15	4	2	1	1	1	1	7	4	4	1	2	1	1	4	1	41	I (95)	88	2	5
		.R.......		X (0)	-	-	-	-	-	-	-	-	-	-	-	-	-	-	-	-	-	-		Ma (5)	5	-	-
PB2	526 - 534	KLTITYSSS	81	I (98)	32	16	15	4	-	1	1	1	1	7	4	4	1	2	1	1	4	1	41	I (90)	83	2	5
		........F		Ma (2)	-	-	-	-	2	-	-	-	-	-	-	-	-	-	-	-	-	-		Mi (5)	5	-	-
		R........		X (0)	-	-	-	-	-	-	-	-	-	-	-	-	-	-	-	-	-	-		Ma (5)	5	-	-
PB2	527 - 535	LTITYSSSM	81	I (94)	28	16	15	4	-	1	1	1	1	7	4	4	1	2	1	1	4	1	41	I (95)	88	2	5
		........L		Ma (4)	4	-	-	-	-	-	-	-	-	-	-	-	-	-	-	-	-	-		X (0)	-	-	-
		.......F.		Mi (2)	-	-	-	-	2	-	-	-	-	-	-	-	-	-	-	-	-	-		Ma (5)	5	-	-
PB2	528 - 536	TITYSSSMM	81	I (94)	28	16	15	4	-	1	1	1	1	7	4	4	1	2	1	1	4	1	41	I (95)	88	2	5
		.......L.		Ma (4)	4	-	-	-	-	-	-	-	-	-	-	-	-	-	-	-	-	-		X (0)	-	-	-
		......F..		Mi (2)	-	-	-	-	2	-	-	-	-	-	-	-	-	-	-	-	-	-		Ma (5)	5	-	-
PB2	529 - 537	ITYSSSMMW	81	I (94)	28	16	15	4	-	1	1	1	1	7	4	4	1	2	1	1	4	1	41	I (95)	88	2	5
		......L..		Ma (4)	4	-	-	-	-	-	-	-	-	-	-	-	-	-	-	-	-	-		X (0)	-	-	-
		.....F...		Mi (2)	-	-	-	-	2	-	-	-	-	-	-	-	-	-	-	-	-	-		Ma (5)	5	-	-
PB2	530 - 538	TYSSSMMWE	81	I (94)	28	16	15	4	-	1	1	1	1	7	4	4	1	2	1	1	4	1	41	I (95)	88	2	5
		.....L...		Ma (4)	4	-	-	-	-	-	-	-	-	-	-	-	-	-	-	-	-	-		X (0)	-	-	-
		....F....		Mi (2)	-	-	-	-	2	-	-	-	-	-	-	-	-	-	-	-	-	-		Ma (5)	5	-	-
PB2	531 - 539	YSSSMMWEI	81	I (94)	28	16	15	4	-	1	1	1	1	7	4	4	1	2	1	1	4	1	41	I (95)	88	2	5
		....L....		Ma (4)	4	-	-	-	-	-	-	-	-	-	-	-	-	-	-	-	-	-		X (0)	-	-	-
		...F.....		Mi (2)	-	-	-	-	2	-	-	-	-	-	-	-	-	-	-	-	-	-		Ma (5)	5	-	-
PB2	532 - 540	SSSMMWEIN	81	I (94)	28	16	15	4	-	1	1	1	1	7	4	4	1	2	1	1	4	1	41	I (95)	88	2	5
		...L.....		Ma (4)	4	-	-	-	-	-	-	-	-	-	-	-	-	-	-	-	-	-		X (0)	-	-	-
		..F......		Mi (2)	-	-	-	-	2	-	-	-	-	-	-	-	-	-	-	-	-	-		Ma (5)	5	-	-
PB2	533 - 541	SSMMWEING	81	I (94)	28	16	15	4	-	1	1	1	1	7	4	4	1	2	1	1	4	1	41	I (95)	88	2	5
		..L......		Ma (4)	4	-	-	-	-	-	-	-	-	-	-	-	-	-	-	-	-	-		X (0)	-	-	-
		.F.......		Mi (2)	-	-	-	-	2	-	-	-	-	-	-	-	-	-	-	-	-	-		Ma (5)	5	-	-
PB2	534 - 542	SMMWEINGP	81	I (94)	28	16	15	4	-	1	1	1	1	7	4	4	1	2	1	1	4	1	41	I (95)	88	2	5
		.L.......		Ma (4)	4	-	-	-	-	-	-	-	-	-	-	-	-	-	-	-	-	-		X (0)	-	-	-
		F........		Mi (2)	-	-	-	-	2	-	-	-	-	-	-	-	-	-	-	-	-	-		Ma (5)	5	-	-
PB2	535 - 543	MMWEINGPE	81	I (96)	28	16	15	4	2	1	1	1	1	7	4	4	1	2	1	1	4	1	41	I (100)	93	2	5
		L........		Ma (4)	4	-	-	-	-	-	-	-	-	-	-	-	-	-	-	-	-	-		X (0)	-	-	-
PB2	536 - 544	MWEINGPES	81	I (100)	32	16	15	4	2	1	1	1	1	7	4	4	1	2	1	1	4	1	41	I (100)	93	2	5
PB2	537 - 545	WEINGPESV	81	I (100)	32	16	15	4	2	1	1	1	1	7	4	4	1	2	1	1	4	1	41	I (100)	93	2	5
PB2	538 - 546	EINGPESVL	81	I (100)	32	16	15	4	2	1	1	1	1	7	4	4	1	2	1	1	4	1	41	I (100)	93	2	5
PB2	539 - 547	INGPESVLV	81	I (100)	32	16	15	4	2	1	1	1	1	7	4	4	1	2	1	1	4	1	41	I (100)	93	2	5
PB2	540 - 548	NGPESVLVN	81	I (100)	32	16	15	4	2	1	1	1	1	7	4	4	1	2	1	1	4	1	41	I (100)	93	2	5
PB2	541 - 549	GPESVLVNT	81	I (100)	32	16	15	4	2	1	1	1	1	7	4	4	1	2	1	1	4	1	41	I (100)	93	2	5
PB2	542 - 550	PESVLVNTY	81	I (100)	32	16	15	4	2	1	1	1	1	7	4	4	1	2	1	1	4	1	41	I (100)	93	2	5
PB2	543 - 551	ESVLVNTYQ	81	I (100)	32	16	15	4	2	1	1	1	1	7	4	4	1	2	1	1	4	1	41	I (100)	93	2	5
PB2	544 - 552	SVLVNTYQW	81	I (100)	32	16	15	4	2	1	1	1	1	7	4	4	1	2	1	1	4	1	41	I (100)	93	2	5
PB2	545 - 553	VLVNTYQWI	81	I (100)	32	16	15	4	2	1	1	1	1	7	4	4	1	2	1	1	4	1	41	I (100)	93	2	5
PB2	546 - 554	LVNTYQWII	81	I (100)	32	16	15	4	2	1	1	1	1	7	4	4	1	2	1	1	4	1	41	I (100)	93	2	5
PB2	547 - 555	VNTYQWIIR	81	I (100)	32	16	15	4	2	1	1	1	1	7	4	4	1	2	1	1	4	1	41	I (100)	93	2	5
PB2	548 - 556	NTYQWIIRN	81	I (100)	32	16	15	4	2	1	1	1	1	7	4	4	1	2	1	1	4	1	41	I (100)	93	2	5
PB2	549 - 557	TYQWIIRNW	81	I (100)	32	16	15	4	2	1	1	1	1	7	4	4	1	2	1	1	4	1	41	I (100)	93	2	5
PB2	550 - 558	YQWIIRNWE	81	I (100)	32	16	15	4	2	1	1	1	1	7	4	4	1	2	1	1	4	1	41	I (100)	93	2	5
PB2	551 - 559	QWIIRNWET	81	I (63)	6	14	15	-	-	1	-	1	-	7	4	4	1	2	1	1	4	1	41	Ma (20)	17	2	-
		........N		Ma (37)	26	2	-	4	2	-	1	-	1	-	-	-	-	-	-	-	-	-		I (81)	76	-	5
PB2	552 - 560	WIIRNWETV	81	I (63)	6	14	15	-	-	1	-	1	-	7	4	4	1	2	1	1	4	1	41	Ma (20)	17	2	-
		.......N.		Ma (37)	26	2	-	4	2	-	1	-	1	-	-	-	-	-	-	-	-	-		I (81)	76	-	5
PB2	553 - 561	IIRNWETVK	81	I (63)	6	14	15	-	-	1	-	1	-	7	4	4	1	2	1	1	4	1	41	Ma (20)	17	2	-
		......N..		Ma (37)	26	2	-	4	2	-	1	-	1	-	-	-	-	-	-	-	-	-		I (81)	76	-	5
PB2	554 - 562	IRNWETVKI	81	I (63)	6	14	15	-	-	1	-	1	-	7	4	4	1	2	1	1	4	1	41	Ma (20)	17	2	-
		.....N...		Ma (37)	26	2	-	4	2	-	1	-	1	-	-	-	-	-	-	-	-	-		I (81)	76	-	5
PB2	555 - 563	RNWETVKIQ	81	I (63)	6	14	15	-	-	1	-	1	-	7	4	4	1	2	1	1	4	1	41	Ma (20)	17	2	-
		....N....		Ma (37)	26	2	-	4	2	-	1	-	1	-	-	-	-	-	-	-	-	-		I (81)	76	-	5
PB2	556 - 564	NWETVKIQW	81	I (63)	6	14	15	-	-	1	-	1	-	7	4	4	1	2	1	1	4	1	41	Ma (20)	17	2	-
		...N.....		Ma (37)	26	2	-	4	2	-	1	-	1	-	-	-	-	-	-	-	-	-		I (81)	76	-	5
PB2	557 - 565	WETVKIQWS	81	I (63)	6	14	15	-	-	1	-	1	-	7	4	4	1	2	1	1	4	1	41	Ma (20)	17	2	-
		..N......		Ma (37)	26	2	-	4	2	-	1	-	1	-	-	-	-	-	-	-	-	-		I (81)	76	-	5
PB2	558 - 566	ETVKIQWSQ	81	I (63)	6	14	15	-	-	1	-	1	-	7	4	4	1	2	1	1	4	1	41	Ma (20)	17	2	-
		.N.......		Ma (37)	26	2	-	4	2	-	1	-	1	-	-	-	-	-	-	-	-	-		I (81)	76	-	5
PB2	559 - 567	TVKIQWSQD	81	I (63)	6	14	15	-	-	1	-	1	-	7	4	4	1	2	1	1	4	1	41	Ma (20)	17	2	-
		N........		Ma (37)	26	2	-	4	2	-	1	-	1	-	-	-	-	-	-	-	-	-		I (81)	76	-	5
PB2	560 - 568	VKIQWSQDP	81	I (100)	32	16	15	4	2	1	1	1	1	7	4	4	1	2	1	1	4	1	41	I (100)	93	2	5
PB2	561 - 569	KIQWSQDPT	81	I (100)	32	16	15	4	2	1	1	1	1	7	4	4	1	2	1	1	4	1	41	I (98)	93	-	5
		........A		X (0)	-	-	-	-	-	-	-	-	-	-	-	-	-	-	-	-	-	-		U (2)	-	2	-
PB2	562 - 570	IQWSQDPTM	81	I (96)	28	16	15	4	2	1	1	1	1	7	4	4	1	2	1	1	4	1	41	I (88)	83	-	5
		........I		Ma (4)	4	-	-	-	-	-	-	-	-	-	-	-	-	-	-	-	-	-		Ma (10)	10	-	-
		.......AI		X (0)	-	-	-	-	-	-	-	-	-	-	-	-	-	-	-	-	-	-		U (2)	-	2	-
PB2	563 - 571	QWSQDPTML	81	I (96)	28	16	15	4	2	1	1	1	1	7	4	4	1	2	1	1	4	1	41	I (88)	83	-	5
		.......I.		Ma (4)	4	-	-	-	-	-	-	-	-	-	-	-	-	-	-	-	-	-		Ma (10)	10	-	-
		......AI.		X (0)	-	-	-	-	-	-	-	-	-	-	-	-	-	-	-	-	-	-		U (2)	-	2	-
PB2	564 - 572	WSQDPTMLY	81	I (96)	28	16	15	4	2	1	1	1	1	7	4	4	1	2	1	1	4	1	41	I (88)	83	-	5
		......I..		Ma (4)	4	-	-	-	-	-	-	-	-	-	-	-	-	-	-	-	-	-		Ma (10)	10	-	-
		.....AI..		X (0)	-	-	-	-	-	-	-	-	-	-	-	-	-	-	-	-	-	-		U (2)	-	2	-
PB2	565 - 573	SQDPTMLYN	81	I (96)	28	16	15	4	2	1	1	1	1	7	4	4	1	2	1	1	4	1	41	I (88)	83	-	5
		.....I...		Ma (4)	4	-	-	-	-	-	-	-	-	-	-	-	-	-	-	-	-	-		Ma (10)	10	-	-
		....AI...		X (0)	-	-	-	-	-	-	-	-	-	-	-	-	-	-	-	-	-	-		U (2)	-	2	-
PB2	566 - 574	QDPTMLYNK	81	I (94)	28	16	15	4	2	1	1	1	1	7	4	2	-	2	1	1	4	1	41	I (88)	83	-	5
		....I....		Ma (4)	4	-	-	-	-	-	-	-	-	-	-	-	-	-	-	-	-	-		Ma (10)	10	-	-
		........R		Mi (2)	-	-	-	-	-	-	-	-	-	-	-	1	1	-	-	-	-	-		X (0)	-	-	-
		...AI....		X (0)	-	-	-	-	-	-	-	-	-	-	-	-	-	-	-	-	-	-		U (2)	-	2	-
PB2	567 - 575	DPTMLYNKM	81	I (94)	28	16	15	4	2	1	1	1	1	7	4	2	-	2	1	1	4	1	41	I (88)	83	-	5
		...I.....		Ma (4)	4	-	-	-	-	-	-	-	-	-	-	-	-	-	-	-	-	-		Ma (10)	10	-	-
		.......R.		Mi (2)	-	-	-	-	-	-	-	-	-	-	-	1	1	-	-	-	-	-		X (0)	-	-	-
		..AI.....		X (0)	-	-	-	-	-	-	-	-	-	-	-	-	-	-	-	-	-	-		U (2)	-	2	-
PB2	568 - 576	PTMLYNKME	81	I (94)	28	16	15	4	2	1	1	1	1	7	4	2	-	2	1	1	4	1	41	I (88)	83	-	5
		..I......		Ma (4)	4	-	-	-	-	-	-	-	-	-	-	-	-	-	-	-	-	-		Ma (10)	10	-	-
		......R..		Mi (2)	-	-	-	-	-	-	-	-	-	-	-	1	1	-	-	-	-	-		X (0)	-	-	-
		.AI......		X (0)	-	-	-	-	-	-	-	-	-	-	-	-	-	-	-	-	-	-		U (2)	-	2	-
PB2	569 - 577	TMLYNKMEF	81	I (94)	28	16	15	4	2	1	1	1	1	7	4	2	-	2	1	1	4	1	41	I (88)	83	-	5
		.I.......		Ma (4)	4	-	-	-	-	-	-	-	-	-	-	-	-	-	-	-	-	-		Ma (10)	10	-	-
		.....R...		Mi (2)	-	-	-	-	-	-	-	-	-	-	-	1	1	-	-	-	-	-		X (0)	-	-	-
		AI.......		X (0)	-	-	-	-	-	-	-	-	-	-	-	-	-	-	-	-	-	-		U (2)	-	2	-
PB2	570 - 578	MLYNKMEFE	81	I (94)	28	16	15	4	2	1	1	1	1	7	4	2	-	2	1	1	4	1	41	I (88)	83	-	5
		I........		Ma (4)	4	-	-	-	-	-	-	-	-	-	-	-	-	-	-	-	-	-		Ma (12)	10	2	-
		....R....		Mi (2)	-	-	-	-	-	-	-	-	-	-	-	1	1	-	-	-	-	-		X (0)	-	-	-
PB2	571 - 579	LYNKMEFEP	81	I (98)	32	16	15	4	2	1	1	1	1	7	4	2	-	2	1	1	4	1	41	I (100)	93	2	5
		...R.....		Ma (2)	-	-	-	-	-	-	-	-	-	-	-	1	1	-	-	-	-	-		X (0)	-	-	-
PB2	572 - 580	YNKMEFEPF	81	I (98)	32	16	15	4	2	1	1	1	1	7	4	2	-	2	1	1	4	1	41	I (100)	93	2	5
		..R......		Ma (2)	-	-	-	-	-	-	-	-	-	-	-	1	1	-	-	-	-	-		X (0)	-	-	-
PB2	573 - 581	NKMEFEPFQ	81	I (98)	32	16	15	4	2	1	1	1	1	7	4	2	-	2	1	1	4	1	41	I (100)	93	2	5
		.R.......		Ma (2)	-	-	-	-	-	-	-	-	-	-	-	1	1	-	-	-	-	-		X (0)	-	-	-
PB2	574 - 582	KMEFEPFQS	81	I (98)	32	16	15	4	2	1	1	1	1	7	4	2	-	2	1	1	4	1	41	I (100)	93	2	5
		R........		Ma (2)	-	-	-	-	-	-	-	-	-	-	-	1	1	-	-	-	-	-		X (0)	-	-	-
PB2	575 - 583	MEFEPFQSL	81	I (100)	32	16	15	4	2	1	1	1	1	7	4	4	1	2	1	1	4	1	41	I (100)	93	2	5
PB2	576 - 584	EFEPFQSLV	81	I (100)	32	16	15	4	2	1	1	1	1	7	4	4	1	2	1	1	4	1	41	I (100)	93	2	5
PB2	577 - 585	FEPFQSLVP	81	I (98)	32	16	12	4	2	1	1	1	1	7	4	4	1	2	1	1	4	1	41	I (100)	93	2	5
		........S		Ma (2)	-	-	2	-	-	-	-	-	-	-	-	-	-	-	-	-	-	-		X (0)	-	-	-
PB2	578 - 586	EPFQSLVPK	81	I (96)	32	16	12	4	2	1	1	1	1	7	4	4	1	2	1	1	2	1	41	I (100)	93	2	5
		.......S.		Ma (2)	-	-	2	-	-	-	-	-	-	-	-	-	-	-	-	-	-	-		X (0)	-	-	-
		........R		U (1)	-	-	-	-	-	-	-	-	-	-	-	-	-	-	-	-	1	-		X (0)	-	-	-
PB2	579 - 587	PFQSLVPKA	81	I (96)	32	16	12	4	2	1	1	1	1	7	4	4	1	2	1	1	2	1	41	I (100)	93	2	5
		......S..		Ma (2)	-	-	2	-	-	-	-	-	-	-	-	-	-	-	-	-	-	-		X (0)	-	-	-
		.......R.		U (1)	-	-	-	-	-	-	-	-	-	-	-	-	-	-	-	-	1	-		X (0)	-	-	-
PB2	580 - 588	FQSLVPKAA	81	I (95)	31	16	12	4	2	1	1	1	1	7	4	4	1	2	1	1	2	1	41	I (100)	93	2	5
		.....S...		Ma (2)	-	-	2	-	-	-	-	-	-	-	-	-	-	-	-	-	-	-		X (0)	-	-	-
		........V		U (1)	1	-	-	-	-	-	-	-	-	-	-	-	-	-	-	-	-	-		X (0)	-	-	-
		......R.T		U (1)	-	-	-	-	-	-	-	-	-	-	-	-	-	-	-	-	1	-		X (0)	-	-	-
PB2	581 - 589	QSLVPKAAR	81	I (95)	31	16	12	4	2	1	1	1	1	7	4	4	1	2	1	1	2	1	41	I (100)	93	2	5
		....S....		Ma (2)	-	-	2	-	-	-	-	-	-	-	-	-	-	-	-	-	-	-		X (0)	-	-	-
		.....R.T.		U (1)	-	-	-	-	-	-	-	-	-	-	-	-	-	-	-	-	1	-		X (0)	-	-	-
		.......V.		U (1)	1	-	-	-	-	-	-	-	-	-	-	-	-	-	-	-	-	-		X (0)	-	-	-
PB2	582 - 590	SLVPKAARG	81	I (78)	31	2	12	4	2	1	1	1	1	7	2	2	-	2	1	1	2	1	41	I (98)	90	2	5
		........S		Ma (17)	-	14	-	-	-	-	-	-	-	-	1	1	1	-	-	-	-	-		U (2)	2	-	-
		...S.....		Mi (2)	-	-	2	-	-	-	-	-	-	-	-	-	-	-	-	-	-	-		X (0)	-	-	-
		....R.T..		U (1)	-	-	-	-	-	-	-	-	-	-	-	-	-	-	-	-	1	-		X (0)	-	-	-
		......V..		U (1)	1	-	-	-	-	-	-	-	-	-	-	-	-	-	-	-	-	-		X (0)	-	-	-
PB2	583 - 591	LVPKAARGQ	81	I (78)	31	2	12	4	2	1	1	1	1	7	2	2	-	2	1	1	2	1	41	I (81)	73	2	5
		.......S.		Ma (17)	-	14	-	-	-	-	-	-	-	-	1	1	1	-	-	-	-	-		U (2)	2	-	-
		..S......		Mi (2)	-	-	2	-	-	-	-	-	-	-	-	-	-	-	-	-	-	-		X (0)	-	-	-
		...R.T...		U (1)	-	-	-	-	-	-	-	-	-	-	-	-	-	-	-	-	1	-		X (0)	-	-	-
		.....V...		U (1)	1	-	-	-	-	-	-	-	-	-	-	-	-	-	-	-	-	-		X (0)	-	-	-
		........K		X (0)	-	-	-	-	-	-	-	-	-	-	-	-	-	-	-	-	-	-		Ma (12)	12	-	-
		........L		X (0)	-	-	-	-	-	-	-	-	-	-	-	-	-	-	-	-	-	-		Mi (5)	5	-	-
PB2	584 - 592	VPKAARGQY	81	I (78)	31	2	12	4	2	1	1	1	1	7	2	2	-	2	1	1	2	1	41	I (81)	73	2	5
		......S..		Ma (17)	-	14	-	-	-	-	-	-	-	-	1	1	1	-	-	-	-	-		U (2)	2	-	-
		.S.......		Mi (2)	-	-	2	-	-	-	-	-	-	-	-	-	-	-	-	-	-	-		X (0)	-	-	-
		....V....		U (1)	1	-	-	-	-	-	-	-	-	-	-	-	-	-	-	-	-	-		X (0)	-	-	-
		..R.T....		U (1)	-	-	-	-	-	-	-	-	-	-	-	-	-	-	-	-	1	-		X (0)	-	-	-
		.......K.		X (0)	-	-	-	-	-	-	-	-	-	-	-	-	-	-	-	-	-	-		Ma (12)	12	-	-
		.......L.		X (0)	-	-	-	-	-	-	-	-	-	-	-	-	-	-	-	-	-	-		Mi (5)	5	-	-
PB2	585 - 593	PKAARGQYS	81	I (78)	31	2	12	4	2	1	1	1	1	7	2	2	-	2	1	1	2	1	41	I (81)	73	2	5
		.....S...		Ma (17)	-	14	-	-	-	-	-	-	-	-	1	1	1	-	-	-	-	-		U (2)	2	-	-
		S........		Mi (2)	-	-	2	-	-	-	-	-	-	-	-	-	-	-	-	-	-	-		X (0)	-	-	-
		...V.....		U (1)	1	-	-	-	-	-	-	-	-	-	-	-	-	-	-	-	-	-		X (0)	-	-	-
		.R.T.....		U (1)	-	-	-	-	-	-	-	-	-	-	-	-	-	-	-	-	1	-		X (0)	-	-	-
		......K..		X (0)	-	-	-	-	-	-	-	-	-	-	-	-	-	-	-	-	-	-		Ma (12)	12	-	-
		......L..		X (0)	-	-	-	-	-	-	-	-	-	-	-	-	-	-	-	-	-	-		Mi (5)	5	-	-
PB2	586 - 594	KAARGQYSG	81	I (80)	31	2	15	4	2	1	1	1	1	7	2	2	-	2	1	1	2	1	41	I (81)	73	2	5
		....S....		Ma (17)	-	14	-	-	-	-	-	-	-	-	1	1	1	-	-	-	-	-		U (2)	2	-	-
		..V......		U (1)	1	-	-	-	-	-	-	-	-	-	-	-	-	-	-	-	-	-		X (0)	-	-	-
		R.T......		U (1)	-	-	-	-	-	-	-	-	-	-	-	-	-	-	-	-	1	-		X (0)	-	-	-
		.....K...		X (0)	-	-	-	-	-	-	-	-	-	-	-	-	-	-	-	-	-	-		Ma (12)	12	-	-
		.....L...		X (0)	-	-	-	-	-	-	-	-	-	-	-	-	-	-	-	-	-	-		Mi (5)	5	-	-
PB2	587 - 595	AARGQYSGF	81	I (80)	31	2	15	4	2	1	1	1	1	7	2	2	-	2	1	1	2	1	41	I (81)	73	2	5
		...S.....		Ma (17)	-	14	-	-	-	-	-	-	-	-	1	1	1	-	-	-	-	-		U (2)	2	-	-
		.T.......		U (1)	-	-	-	-	-	-	-	-	-	-	-	-	-	-	-	-	1	-		X (0)	-	-	-
		.V.......		U (1)	1	-	-	-	-	-	-	-	-	-	-	-	-	-	-	-	-	-		X (0)	-	-	-
		....K....		X (0)	-	-	-	-	-	-	-	-	-	-	-	-	-	-	-	-	-	-		Ma (12)	12	-	-
		....L....		X (0)	-	-	-	-	-	-	-	-	-	-	-	-	-	-	-	-	-	-		Mi (5)	5	-	-
PB2	588 - 596	ARGQYSGFV	81	I (80)	31	2	15	4	2	1	1	1	1	7	2	2	-	2	1	1	2	1	41	I (81)	73	2	5
		..S......		Ma (17)	-	14	-	-	-	-	-	-	-	-	1	1	1	-	-	-	-	-		U (2)	2	-	-
		V........		U (1)	1	-	-	-	-	-	-	-	-	-	-	-	-	-	-	-	-	-		X (0)	-	-	-
		T........		U (1)	-	-	-	-	-	-	-	-	-	-	-	-	-	-	-	-	1	-		X (0)	-	-	-
		...K.....		X (0)	-	-	-	-	-	-	-	-	-	-	-	-	-	-	-	-	-	-		Ma (12)	12	-	-
		...L.....		X (0)	-	-	-	-	-	-	-	-	-	-	-	-	-	-	-	-	-	-		Mi (5)	5	-	-
PB2	589 - 597	RGQYSGFVR	81	I (83)	32	2	15	4	2	1	1	1	1	7	2	2	-	2	1	1	4	1	41	I (81)	73	2	5
		.S.......		Ma (17)	-	14	-	-	-	-	-	-	-	-	1	1	1	-	-	-	-	-		U (2)	2	-	-
		..K......		X (0)	-	-	-	-	-	-	-	-	-	-	-	-	-	-	-	-	-	-		Ma (12)	12	-	-
		..L......		X (0)	-	-	-	-	-	-	-	-	-	-	-	-	-	-	-	-	-	-		Mi (5)	5	-	-
PB2	590 - 598	GQYSGFVRV	81	I (43)	32	2	-	4	2	-	1	-	1	-	-	-	-	-	-	-	-	-	41	I (81)	73	2	5
		........T		Ma (38)	-	-	15	-	-	1	-	1	-	7	2	2	-	2	1	1	4	-		X (0)	-	-	-
		S.......T		Mi (17)	-	14	-	-	-	-	-	-	-	-	1	1	1	-	-	-	-	-		X (0)	-	-	-
		........A		U (1)	-	-	-	-	-	-	-	-	-	-	-	-	-	-	-	-	-	1		X (0)	-	-	-
		.K.......		X (0)	-	-	-	-	-	-	-	-	-	-	-	-	-	-	-	-	-	-		Ma (12)	12	-	-
		.L.......		X (0)	-	-	-	-	-	-	-	-	-	-	-	-	-	-	-	-	-	-		Mi (5)	5	-	-
		S........		X (0)	-	-	-	-	-	-	-	-	-	-	-	-	-	-	-	-	-	-		U (2)	2	-	-
PB2	591 - 599	QYSGFVRTL	81	I (56)	-	14	15	-	-	1	-	1	-	7	4	4	1	2	1	1	4	-	41	X (0)	-	-	-
		.......V.		Ma (43)	32	2	-	4	2	-	1	-	1	-	-	-	-	-	-	-	-	-		I (83)	76	2	5
		.......A.		U (1)	-	-	-	-	-	-	-	-	-	-	-	-	-	-	-	-	-	1		X (0)	-	-	-
		K......V.		X (0)	-	-	-	-	-	-	-	-	-	-	-	-	-	-	-	-	-	-		Ma (12)	12	-	-
		L......V.		X (0)	-	-	-	-	-	-	-	-	-	-	-	-	-	-	-	-	-	-		Mi (5)	5	-	-
PB2	592 - 600	YSGFVRTLF	81	I (56)	-	14	15	-	-	1	-	1	-	7	4	4	1	2	1	1	4	-	41	X (0)	-	-	-
		......V..		Ma (43)	32	2	-	4	2	-	1	-	1	-	-	-	-	-	-	-	-	-		I (100)	93	2	5
		......A..		U (1)	-	-	-	-	-	-	-	-	-	-	-	-	-	-	-	-	-	1		X (0)	-	-	-
PB2	593 - 601	SGFVRTLFQ	81	I (56)	-	14	15	-	-	1	-	1	-	7	4	4	1	2	1	1	4	-	41	X (0)	-	-	-
		.....V...		Ma (43)	32	2	-	4	2	-	1	-	1	-	-	-	-	-	-	-	-	-		I (100)	93	2	5
		.....A...		U (1)	-	-	-	-	-	-	-	-	-	-	-	-	-	-	-	-	-	1		X (0)	-	-	-
PB2	594 - 602	GFVRTLFQQ	81	I (56)	-	14	15	-	-	1	-	1	-	7	4	4	1	2	1	1	4	-	41	X (0)	-	-	-
		....V....		Ma (43)	32	2	-	4	2	-	1	-	1	-	-	-	-	-	-	-	-	-		I (100)	93	2	5
		....A....		U (1)	-	-	-	-	-	-	-	-	-	-	-	-	-	-	-	-	-	1		X (0)	-	-	-
PB2	595 - 603	FVRTLFQQM	81	I (56)	-	14	15	-	-	1	-	1	-	7	4	4	1	2	1	1	4	-	41	X (0)	-	-	-
		...V.....		Ma (43)	32	2	-	4	2	-	1	-	1	-	-	-	-	-	-	-	-	-		I (100)	93	2	5
		...A.....		U (1)	-	-	-	-	-	-	-	-	-	-	-	-	-	-	-	-	-	1		X (0)	-	-	-
PB2	596 - 604	VRTLFQQMR	81	I (56)	-	14	15	-	-	1	-	1	-	7	4	4	1	2	1	1	4	-	41	X (0)	-	-	-
		..V......		Ma (43)	32	2	-	4	2	-	1	-	1	-	-	-	-	-	-	-	-	-		I (100)	93	2	5
		..A......		U (1)	-	-	-	-	-	-	-	-	-	-	-	-	-	-	-	-	-	1		X (0)	-	-	-
PB2	597 - 605	RTLFQQMRD	81	I (56)	-	14	15	-	-	1	-	1	-	7	4	4	1	2	1	1	4	-	41	X (0)	-	-	-
		.V.......		Ma (43)	32	2	-	4	2	-	1	-	1	-	-	-	-	-	-	-	-	-		I (100)	93	2	5
		.A.......		U (1)	-	-	-	-	-	-	-	-	-	-	-	-	-	-	-	-	-	1		X (0)	-	-	-
PB2	598 - 606	TLFQQMRDV	81	I (56)	-	14	15	-	-	1	-	1	-	7	4	4	1	2	1	1	4	-	41	X (0)	-	-	-
		V........		Ma (43)	32	2	-	4	2	-	1	-	1	-	-	-	-	-	-	-	-	-		I (100)	93	2	5
		A........		U (1)	-	-	-	-	-	-	-	-	-	-	-	-	-	-	-	-	-	1		X (0)	-	-	-
PB2	599 - 607	LFQQMRDVL	81	I (100)	32	16	15	4	2	1	1	1	1	7	4	4	1	2	1	1	4	1	41	I (100)	93	2	5
PB2	600 - 608	FQQMRDVLG	81	I (100)	32	16	15	4	2	1	1	1	1	7	4	4	1	2	1	1	4	1	41	I (100)	93	2	5
PB2	601 - 609	QQMRDVLGT	81	I (100)	32	16	15	4	2	1	1	1	1	7	4	4	1	2	1	1	4	1	41	I (100)	93	2	5
PB2	602 - 610	QMRDVLGTF	81	I (100)	32	16	15	4	2	1	1	1	1	7	4	4	1	2	1	1	4	1	41	I (100)	93	2	5
PB2	603 - 611	MRDVLGTFD	81	I (99)	32	16	15	4	2	-	1	1	1	7	4	4	1	2	1	1	4	1	41	I (100)	93	2	5
		........G		U (1)	-	-	-	-	-	1	-	-	-	-	-	-	-	-	-	-	-	-		X (0)	-	-	-
PB2	604 - 612	RDVLGTFDT	81	I (99)	32	16	15	4	2	-	1	1	1	7	4	4	1	2	1	1	4	1	41	I (100)	93	2	5
		.......G.		U (1)	-	-	-	-	-	1	-	-	-	-	-	-	-	-	-	-	-	-		X (0)	-	-	-
PB2	605 - 613	DVLGTFDTV	81	I (99)	32	16	15	4	2	-	1	1	1	7	4	4	1	2	1	1	4	1	41	I (100)	93	2	5
		......G..		U (1)	-	-	-	-	-	1	-	-	-	-	-	-	-	-	-	-	-	-		X (0)	-	-	-
PB2	606 - 614	VLGTFDTVQ	81	I (99)	32	16	15	4	2	-	1	1	1	7	4	4	1	2	1	1	4	1	41	I (100)	93	2	5
		.....G...		U (1)	-	-	-	-	-	1	-	-	-	-	-	-	-	-	-	-	-	-		X (0)	-	-	-
PB2	607 - 615	LGTFDTVQI	81	I (99)	32	16	15	4	2	-	1	1	1	7	4	4	1	2	1	1	4	1	41	I (100)	93	2	5
		....G....		U (1)	-	-	-	-	-	1	-	-	-	-	-	-	-	-	-	-	-	-		X (0)	-	-	-
PB2	608 - 616	GTFDTVQII	81	I (99)	32	16	15	4	2	-	1	1	1	7	4	4	1	2	1	1	4	1	41	I (100)	93	2	5
		...G.....		U (1)	-	-	-	-	-	1	-	-	-	-	-	-	-	-	-	-	-	-		X (0)	-	-	-
PB2	609 - 617	TFDTVQIIK	81	I (99)	32	16	15	4	2	-	1	1	1	7	4	4	1	2	1	1	4	1	41	I (100)	93	2	5
		..G......		U (1)	-	-	-	-	-	1	-	-	-	-	-	-	-	-	-	-	-	-		X (0)	-	-	-
PB2	610 - 618	FDTVQIIKL	81	I (98)	31	16	15	4	2	-	1	1	1	7	4	4	1	2	1	1	4	1	41	I (100)	93	2	5
		........R		U (1)	1	-	-	-	-	-	-	-	-	-	-	-	-	-	-	-	-	-		X (0)	-	-	-
		.G.......		U (1)	-	-	-	-	-	1	-	-	-	-	-	-	-	-	-	-	-	-		X (0)	-	-	-
PB2	611 - 619	DTVQIIKLL	81	I (98)	31	16	15	4	2	-	1	1	1	7	4	4	1	2	1	1	4	1	41	I (100)	93	2	5
		.......RV		U (1)	1	-	-	-	-	-	-	-	-	-	-	-	-	-	-	-	-	-		X (0)	-	-	-
		G........		U (1)	-	-	-	-	-	1	-	-	-	-	-	-	-	-	-	-	-	-		X (0)	-	-	-
PB2	612 - 620	TVQIIKLLP	81	I (99)	31	16	15	4	2	1	1	1	1	7	4	4	1	2	1	1	4	1	41	I (100)	93	2	5
		......RVT		U (1)	1	-	-	-	-	-	-	-	-	-	-	-	-	-	-	-	-	-		X (0)	-	-	-
PB2	613 - 621	VQIIKLLPF	81	I (99)	31	16	15	4	2	1	1	1	1	7	4	4	1	2	1	1	4	1	41	I (100)	93	2	5
		.....RVTV		U (1)	1	-	-	-	-	-	-	-	-	-	-	-	-	-	-	-	-	-		X (0)	-	-	-
PB2	614 - 622	QIIKLLPFA	81	I (99)	31	16	15	4	2	1	1	1	1	7	4	4	1	2	1	1	4	1	41	I (100)	93	2	5
		....RVTV.		U (1)	1	-	-	-	-	-	-	-	-	-	-	-	-	-	-	-	-	-		X (0)	-	-	-
PB2	615 - 623	IIKLLPFAA	81	I (99)	31	16	15	4	2	1	1	1	1	7	4	4	1	2	1	1	4	1	41	I (100)	93	2	5
		...RVTV..		U (1)	1	-	-	-	-	-	-	-	-	-	-	-	-	-	-	-	-	-		X (0)	-	-	-
PB2	616 - 624	IKLLPFAAA	81	I (98)	31	16	15	4	2	1	1	1	1	7	4	4	1	2	1	-	4	1	41	I (100)	93	2	5
		........S		U (1)	-	-	-	-	-	-	-	-	-	-	-	-	-	-	-	1	-	-		X (0)	-	-	-
		..RVTV..D		U (1)	1	-	-	-	-	-	-	-	-	-	-	-	-	-	-	-	-	-		X (0)	-	-	-
PB2	617 - 625	KLLPFAAAP	81	I (98)	31	16	15	4	2	1	1	1	1	7	4	4	1	2	1	-	4	1	41	I (100)	93	2	5
		.RVTV..D.		U (1)	1	-	-	-	-	-	-	-	-	-	-	-	-	-	-	-	-	-		X (0)	-	-	-
		.......S.		U (1)	-	-	-	-	-	-	-	-	-	-	-	-	-	-	-	1	-	-		X (0)	-	-	-
PB2	618 - 626	LLPFAAAPP	81	I (96)	31	16	15	4	2	1	1	1	1	7	4	4	1	2	1	-	2	1	41	I (100)	93	2	5
		........R		U (1)	-	-	-	-	-	-	-	-	-	-	-	-	-	-	-	-	1	-		X (0)	-	-	-
		RVTV..D..		U (1)	1	-	-	-	-	-	-	-	-	-	-	-	-	-	-	-	-	-		X (0)	-	-	-
		......S..		U (1)	-	-	-	-	-	-	-	-	-	-	-	-	-	-	-	1	-	-		X (0)	-	-	-
PB2	619 - 627	LPFAAAPPE	80	I (95)	31	16	15	4	-	1	1	1	1	8	4	4	1	3	1	-	3	1	40	Ma (33)	30	-	3
		.....S...		U (1)	-	-	-	-	-	-	-	-	-	-	-	-	-	-	-	1	-	-		X (0)	-	-	-
		VTV..D...		U (1)	1	-	-	-	-	-	-	-	-	-	-	-	-	-	-	-	-	-		X (0)	-	-	-
		........K		U (1)	-	-	-	-	1	-	-	-	-	-	-	-	-	-	-	-	-	-		I (68)	63	3	3
		.......RK		U (1)	-	-	-	-	-	-	-	-	-	-	-	-	-	-	-	-	1	-		X (0)	-	-	-
PB2	620 - 628	PFAAAPPEQ	80	I (95)	31	16	15	4	-	1	1	1	1	8	4	4	1	3	1	-	3	1	40	Ma (33)	30	-	3
		....S....		U (1)	-	-	-	-	-	-	-	-	-	-	-	-	-	-	-	1	-	-		X (0)	-	-	-
		.......K.		U (1)	-	-	-	-	1	-	-	-	-	-	-	-	-	-	-	-	-	-		I (68)	63	3	3
		......RK.		U (1)	-	-	-	-	-	-	-	-	-	-	-	-	-	-	-	-	1	-		X (0)	-	-	-
		TV..D....		U (1)	1	-	-	-	-	-	-	-	-	-	-	-	-	-	-	-	-	-		X (0)	-	-	-
PB2	621 - 629	FAAAPPEQS	80	I (95)	31	16	15	4	-	1	1	1	1	8	4	4	1	3	1	-	3	1	40	Ma (33)	30	-	3
		.....RK..		U (1)	-	-	-	-	-	-	-	-	-	-	-	-	-	-	-	-	1	-		X (0)	-	-	-
		...S.....		U (1)	-	-	-	-	-	-	-	-	-	-	-	-	-	-	-	1	-	-		X (0)	-	-	-
		......K..		U (1)	-	-	-	-	1	-	-	-	-	-	-	-	-	-	-	-	-	-		I (68)	63	3	3
		V..D.....		U (1)	1	-	-	-	-	-	-	-	-	-	-	-	-	-	-	-	-	-		X (0)	-	-	-
PB2	622 - 630	AAAPPEQSR	80	I (94)	31	16	14	4	-	1	1	1	1	8	4	4	1	3	1	-	3	1	40	Ma (33)	30	-	3
		........K		U (1)	-	-	1	-	-	-	-	-	-	-	-	-	-	-	-	-	-	-		X (0)	-	-	-
		..D......		U (1)	1	-	-	-	-	-	-	-	-	-	-	-	-	-	-	-	-	-		X (0)	-	-	-
		....RK...		U (1)	-	-	-	-	-	-	-	-	-	-	-	-	-	-	-	-	1	-		X (0)	-	-	-
		..S......		U (1)	-	-	-	-	-	-	-	-	-	-	-	-	-	-	-	1	-	-		X (0)	-	-	-
		.....K...		U (1)	-	-	-	-	1	-	-	-	-	-	-	-	-	-	-	-	-	-		I (68)	63	3	3
PB2	623 - 631	AAPPEQSRM	80	I (94)	31	16	14	4	-	1	1	1	1	8	4	4	1	3	1	-	3	1	40	Ma (33)	30	-	3
		.......K.		U (1)	-	-	1	-	-	-	-	-	-	-	-	-	-	-	-	-	-	-		X (0)	-	-	-
		...RK....		U (1)	-	-	-	-	-	-	-	-	-	-	-	-	-	-	-	-	1	-		X (0)	-	-	-
		.D.......		U (1)	1	-	-	-	-	-	-	-	-	-	-	-	-	-	-	-	-	-		X (0)	-	-	-
		....K....		U (1)	-	-	-	-	1	-	-	-	-	-	-	-	-	-	-	-	-	-		I (68)	63	3	3
		.S.......		U (1)	-	-	-	-	-	-	-	-	-	-	-	-	-	-	-	1	-	-		X (0)	-	-	-
PB2	624 - 632	APPEQSRMQ	80	I (94)	31	16	14	4	-	1	1	1	1	8	4	4	1	3	1	-	3	1	40	Ma (33)	30	-	3
		......K..		U (1)	-	-	1	-	-	-	-	-	-	-	-	-	-	-	-	-	-	-		X (0)	-	-	-
		D........		U (1)	1	-	-	-	-	-	-	-	-	-	-	-	-	-	-	-	-	-		X (0)	-	-	-
		..RK.....		U (1)	-	-	-	-	-	-	-	-	-	-	-	-	-	-	-	-	1	-		X (0)	-	-	-
		...K.....		U (1)	-	-	-	-	1	-	-	-	-	-	-	-	-	-	-	-	-	-		I (68)	63	3	3
		S........		U (1)	-	-	-	-	-	-	-	-	-	-	-	-	-	-	-	1	-	-		X (0)	-	-	-
PB2	625 - 633	PPEQSRMQF	80	I (96)	33	16	14	4	-	1	1	1	1	8	4	4	1	3	1	1	3	1	40	Ma (33)	30	-	3
		.....K...		U (1)	-	-	1	-	-	-	-	-	-	-	-	-	-	-	-	-	-	-		X (0)	-	-	-
		.RK......		U (1)	-	-	-	-	-	-	-	-	-	-	-	-	-	-	-	-	1	-		X (0)	-	-	-
		..K......		U (1)	-	-	-	-	1	-	-	-	-	-	-	-	-	-	-	-	-	-		I (68)	63	3	3
PB2	626 - 634	PEQSRMQFS	80	I (95)	33	16	13	4	-	1	1	1	1	8	4	4	1	3	1	1	3	1	40	Ma (33)	30	-	3
		RK.......		U (1)	-	-	-	-	-	-	-	-	-	-	-	-	-	-	-	-	1	-		X (0)	-	-	-
		........F		U (1)	-	-	1	-	-	-	-	-	-	-	-	-	-	-	-	-	-	-		X (0)	-	-	-
		....K....		U (1)	-	-	1	-	-	-	-	-	-	-	-	-	-	-	-	-	-	-		X (0)	-	-	-
		.K.......		U (1)	-	-	-	-	1	-	-	-	-	-	-	-	-	-	-	-	-	-		I (68)	63	3	3
PB2	627 - 635	EQSRMQFSS	80	I (95)	33	16	13	4	-	1	1	1	1	8	4	4	1	3	1	1	3	1	40	Ma (33)	30	-	3
		K........		Ma (3)	-	-	-	-	1	-	-	-	-	-	-	-	-	-	-	-	1	-		I (68)	63	3	3
		...K.....		U (1)	-	-	1	-	-	-	-	-	-	-	-	-	-	-	-	-	-	-		X (0)	-	-	-
		.......F.		U (1)	-	-	1	-	-	-	-	-	-	-	-	-	-	-	-	-	-	-		X (0)	-	-	-
PB2	628 - 636	QSRMQFSSL	81	I (98)	32	16	12	4	2	1	1	1	1	7	4	4	1	2	1	1	4	1	41	I (100)	93	2	5
		......F..		U (1)	-	-	1	-	-	-	-	-	-	-	-	-	-	-	-	-	-	-		X (0)	-	-	-
		..K......		U (1)	-	-	1	-	-	-	-	-	-	-	-	-	-	-	-	-	-	-		X (0)	-	-	-
PB2	629 - 637	SRMQFSSLT	81	I (98)	32	16	12	4	2	1	1	1	1	7	4	4	1	2	1	1	4	1	41	I (100)	93	2	5
		.K.......		U (1)	-	-	1	-	-	-	-	-	-	-	-	-	-	-	-	-	-	-		X (0)	-	-	-
		.....F...		U (1)	-	-	1	-	-	-	-	-	-	-	-	-	-	-	-	-	-	-		X (0)	-	-	-
PB2	630 - 638	RMQFSSLTV	81	I (98)	32	16	12	4	2	1	1	1	1	7	4	4	1	2	1	1	4	1	41	I (100)	93	2	5
		K........		U (1)	-	-	1	-	-	-	-	-	-	-	-	-	-	-	-	-	-	-		X (0)	-	-	-
		....F....		U (1)	-	-	1	-	-	-	-	-	-	-	-	-	-	-	-	-	-	-		X (0)	-	-	-
PB2	631 - 639	MQFSSLTVN	81	I (99)	32	16	14	4	2	1	1	1	1	7	4	4	1	2	1	1	4	1	41	I (100)	93	2	5
		...F.....		U (1)	-	-	1	-	-	-	-	-	-	-	-	-	-	-	-	-	-	-		X (0)	-	-	-
PB2	632 - 640	QFSSLTVNV	81	I (99)	32	16	14	4	2	1	1	1	1	7	4	4	1	2	1	1	4	1	41	I (100)	93	2	5
		..F......		U (1)	-	-	1	-	-	-	-	-	-	-	-	-	-	-	-	-	-	-		X (0)	-	-	-
PB2	633 - 641	FSSLTVNVR	81	I (99)	32	16	14	4	2	1	1	1	1	7	4	4	1	2	1	1	4	1	41	I (100)	93	2	5
		.F.......		U (1)	-	-	1	-	-	-	-	-	-	-	-	-	-	-	-	-	-	-		X (0)	-	-	-
PB2	634 - 642	SSLTVNVRG	81	I (99)	32	16	14	4	2	1	1	1	1	7	4	4	1	2	1	1	4	1	41	I (100)	93	2	5
		F........		U (1)	-	-	1	-	-	-	-	-	-	-	-	-	-	-	-	-	-	-		X (0)	-	-	-
PB2	635 - 643	SLTVNVRGS	81	I (100)	32	16	15	4	2	1	1	1	1	7	4	4	1	2	1	1	4	1	41	I (100)	93	2	5
PB2	636 - 644	LTVNVRGSG	81	I (100)	32	16	15	4	2	1	1	1	1	7	4	4	1	2	1	1	4	1	41	I (100)	93	2	5
PB2	637 - 645	TVNVRGSGM	81	I (100)	32	16	15	4	2	1	1	1	1	7	4	4	1	2	1	1	4	1	41	I (100)	93	2	5
PB2	638 - 646	VNVRGSGMR	81	I (100)	32	16	15	4	2	1	1	1	1	7	4	4	1	2	1	1	4	1	41	I (100)	93	2	5
PB2	639 - 647	NVRGSGMRI	81	I (91)	28	16	15	4	2	1	1	1	1	2	4	4	1	2	1	1	4	1	41	I (100)	93	2	5
		........V		Ma (9)	4	-	-	-	-	-	-	-	-	5	-	-	-	-	-	-	-	-		X (0)	-	-	-
PB2	640 - 648	VRGSGMRIL	81	I (52)	-	14	15	-	-	1	-	1	-	2	4	4	1	2	1	1	4	1	41	X (0)	-	-	-
		........V		Ma (40)	28	2	-	4	2	-	1	-	1	-	-	-	-	-	-	-	-	-		I (100)	93	2	5
		.......V.		Mi (5)	-	-	-	-	-	-	-	-	-	5	-	-	-	-	-	-	-	-		X (0)	-	-	-
		.......VV		Mi (4)	4	-	-	-	-	-	-	-	-	-	-	-	-	-	-	-	-	-		X (0)	-	-	-
PB2	641 - 649	RGSGMRILV	81	I (52)	-	14	15	-	-	1	-	1	-	2	4	4	1	2	1	1	4	1	41	X (0)	-	-	-
		.......V.		Ma (40)	28	2	-	4	2	-	1	-	1	-	-	-	-	-	-	-	-	-		I (100)	93	2	5
		......V..		Mi (5)	-	-	-	-	-	-	-	-	-	5	-	-	-	-	-	-	-	-		X (0)	-	-	-
		......VV.		Mi (4)	4	-	-	-	-	-	-	-	-	-	-	-	-	-	-	-	-	-		X (0)	-	-	-
PB2	642 - 650	GSGMRILVR	81	I (52)	-	14	15	-	-	1	-	1	-	2	4	4	1	2	1	1	4	1	41	X (0)	-	-	-
		......V..		Ma (40)	28	2	-	4	2	-	1	-	1	-	-	-	-	-	-	-	-	-		I (100)	93	2	5
		.....V...		Mi (5)	-	-	-	-	-	-	-	-	-	5	-	-	-	-	-	-	-	-		X (0)	-	-	-
		.....VV..		Mi (4)	4	-	-	-	-	-	-	-	-	-	-	-	-	-	-	-	-	-		X (0)	-	-	-
PB2	643 - 651	SGMRILVRG	81	I (52)	-	14	15	-	-	1	-	1	-	2	4	4	1	2	1	1	4	1	41	X (0)	-	-	-
		.....V...		Ma (40)	28	2	-	4	2	-	1	-	1	-	-	-	-	-	-	-	-	-		I (100)	93	2	5
		....V....		Mi (5)	-	-	-	-	-	-	-	-	-	5	-	-	-	-	-	-	-	-		X (0)	-	-	-
		....VV...		Mi (4)	4	-	-	-	-	-	-	-	-	-	-	-	-	-	-	-	-	-		X (0)	-	-	-
PB2	644 - 652	GMRILVRGN	81	I (52)	-	14	15	-	-	1	-	1	-	2	4	4	1	2	1	1	4	1	41	X (0)	-	-	-
		....V....		Ma (40)	28	2	-	4	2	-	1	-	1	-	-	-	-	-	-	-	-	-		I (100)	93	2	5
		...V.....		Mi (5)	-	-	-	-	-	-	-	-	-	5	-	-	-	-	-	-	-	-		X (0)	-	-	-
		...VV....		Mi (4)	4	-	-	-	-	-	-	-	-	-	-	-	-	-	-	-	-	-		X (0)	-	-	-
PB2	645 - 653	MRILVRGNS	81	I (52)	-	14	15	-	-	1	-	1	-	2	4	4	1	2	1	1	4	1	41	X (0)	-	-	-
		...V.....		Ma (40)	28	2	-	4	2	-	1	-	1	-	-	-	-	-	-	-	-	-		I (100)	93	2	5
		..V......		Mi (5)	-	-	-	-	-	-	-	-	-	5	-	-	-	-	-	-	-	-		X (0)	-	-	-
		..VV.....		Mi (4)	4	-	-	-	-	-	-	-	-	-	-	-	-	-	-	-	-	-		X (0)	-	-	-
PB2	646 - 654	RILVRGNSP	81	I (52)	-	14	15	-	-	1	-	1	-	2	4	4	1	2	1	1	4	1	41	X (0)	-	-	-
		..V......		Ma (40)	28	2	-	4	2	-	1	-	1	-	-	-	-	-	-	-	-	-		I (100)	93	2	5
		.V.......		Mi (5)	-	-	-	-	-	-	-	-	-	5	-	-	-	-	-	-	-	-		X (0)	-	-	-
		.VV......		Mi (4)	4	-	-	-	-	-	-	-	-	-	-	-	-	-	-	-	-	-		X (0)	-	-	-
PB2	647 - 655	ILVRGNSPV	81	I (49)	-	14	15	-	-	1	-	1	-	2	1	4	1	2	1	1	4	1	41	X (0)	-	-	-
		.V.......		Ma (40)	28	2	-	4	2	-	1	-	1	-	-	-	-	-	-	-	-	-		I (100)	93	2	5
		V........		Mi (5)	-	-	-	-	-	-	-	-	-	5	-	-	-	-	-	-	-	-		X (0)	-	-	-
		VV.......		Mi (4)	4	-	-	-	-	-	-	-	-	-	-	-	-	-	-	-	-	-		X (0)	-	-	-
		........L		Mi (2)	-	-	-	-	-	-	-	-	-	-	2	-	-	-	-	-	-	-		X (0)	-	-	-
PB2	648 - 656	LVRGNSPVF	81	I (54)	-	14	15	-	-	1	-	1	-	7	1	4	1	2	1	1	4	1	41	X (0)	-	-	-
		V........		Ma (43)	32	2	-	4	2	-	1	-	1	-	-	-	-	-	-	-	-	-		I (100)	93	2	5
		.......L.		Mi (2)	-	-	-	-	-	-	-	-	-	-	2	-	-	-	-	-	-	-		X (0)	-	-	-
PB2	649 - 657	VRGNSPVFN	81	I (98)	32	16	15	4	2	1	1	1	1	7	1	4	1	2	1	1	4	1	41	I (100)	93	2	5
		......L..		Ma (2)	-	-	-	-	-	-	-	-	-	-	2	-	-	-	-	-	-	-		X (0)	-	-	-
PB2	650 - 658	RGNSPVFNY	81	I (98)	32	16	15	4	2	1	1	1	1	7	1	4	1	2	1	1	4	1	41	I (100)	93	2	5
		.....L...		Ma (2)	-	-	-	-	-	-	-	-	-	-	2	-	-	-	-	-	-	-		X (0)	-	-	-
PB2	651 - 659	GNSPVFNYN	81	I (96)	32	16	15	4	2	1	1	1	1	7	1	4	1	2	-	1	4	1	41	I (100)	93	2	5
		....L....		Ma (2)	-	-	-	-	-	-	-	-	-	-	2	-	-	-	-	-	-	-		X (0)	-	-	-
		........T		U (1)	-	-	-	-	-	-	-	-	-	-	-	-	-	-	1	-	-	-		X (0)	-	-	-
PB2	652 - 660	NSPVFNYNK	81	I (95)	32	16	15	4	2	1	1	1	1	7	-	4	1	2	-	1	4	1	41	I (100)	93	2	5
		...L.....		Ma (2)	-	-	-	-	-	-	-	-	-	-	2	-	-	-	-	-	-	-		X (0)	-	-	-
		........R		U (1)	-	-	-	-	-	-	-	-	-	-	1	-	-	-	-	-	-	-		X (0)	-	-	-
		.......T.		U (1)	-	-	-	-	-	-	-	-	-	-	-	-	-	-	1	-	-	-		X (0)	-	-	-
PB2	653 - 661	SPVFNYNKA	81	I (95)	32	16	15	4	2	1	1	1	1	7	-	4	1	2	-	1	4	1	41	I (100)	93	2	5
		..L......		Ma (2)	-	-	-	-	-	-	-	-	-	-	2	-	-	-	-	-	-	-		X (0)	-	-	-
		.......R.		U (1)	-	-	-	-	-	-	-	-	-	-	1	-	-	-	-	-	-	-		X (0)	-	-	-
		......T.T		U (1)	-	-	-	-	-	-	-	-	-	-	-	-	-	-	1	-	-	-		X (0)	-	-	-
PB2	654 - 662	PVFNYNKAT	81	I (95)	32	16	15	4	2	1	1	1	1	7	-	4	1	2	-	1	4	1	41	I (100)	93	2	5
		.L.......		Ma (2)	-	-	-	-	-	-	-	-	-	-	2	-	-	-	-	-	-	-		X (0)	-	-	-
		.....T.T.		U (1)	-	-	-	-	-	-	-	-	-	-	-	-	-	-	1	-	-	-		X (0)	-	-	-
		......R..		U (1)	-	-	-	-	-	-	-	-	-	-	1	-	-	-	-	-	-	-		X (0)	-	-	-
PB2	655 - 663	VFNYNKATK	81	I (95)	32	16	15	4	2	1	1	1	1	7	-	4	1	2	-	1	4	1	41	I (100)	93	2	5
		L........		Ma (2)	-	-	-	-	-	-	-	-	-	-	2	-	-	-	-	-	-	-		X (0)	-	-	-
		.....R...		U (1)	-	-	-	-	-	-	-	-	-	-	1	-	-	-	-	-	-	-		X (0)	-	-	-
		....T.T..		U (1)	-	-	-	-	-	-	-	-	-	-	-	-	-	-	1	-	-	-		X (0)	-	-	-
PB2	656 - 664	FNYNKATKR	81	I (98)	32	16	15	4	2	1	1	1	1	7	2	4	1	2	-	1	4	1	41	I (98)	90	2	5
		...T.T...		U (1)	-	-	-	-	-	-	-	-	-	-	-	-	-	-	1	-	-	-		X (0)	-	-	-
		....R....		U (1)	-	-	-	-	-	-	-	-	-	-	1	-	-	-	-	-	-	-		X (0)	-	-	-
		........K		X (0)	-	-	-	-	-	-	-	-	-	-	-	-	-	-	-	-	-	-		U (2)	2	-	-
PB2	657 - 665	NYNKATKRL	81	I (98)	32	16	15	4	2	1	1	1	1	7	2	4	1	2	-	1	4	1	41	I (98)	90	2	5
		..T.T....		U (1)	-	-	-	-	-	-	-	-	-	-	-	-	-	-	1	-	-	-		X (0)	-	-	-
		...R.....		U (1)	-	-	-	-	-	-	-	-	-	-	1	-	-	-	-	-	-	-		X (0)	-	-	-
		.......K.		X (0)	-	-	-	-	-	-	-	-	-	-	-	-	-	-	-	-	-	-		U (2)	2	-	-
PB2	658 - 666	YNKATKRLT	81	I (98)	32	16	15	4	2	1	1	1	1	7	2	4	1	2	-	1	4	1	41	I (98)	90	2	5
		..R......		U (1)	-	-	-	-	-	-	-	-	-	-	1	-	-	-	-	-	-	-		X (0)	-	-	-
		.T.T.....		U (1)	-	-	-	-	-	-	-	-	-	-	-	-	-	-	1	-	-	-		X (0)	-	-	-
		......K..		X (0)	-	-	-	-	-	-	-	-	-	-	-	-	-	-	-	-	-	-		U (2)	2	-	-
PB2	659 - 667	NKATKRLTV	81	I (96)	32	16	15	4	2	1	1	1	1	7	2	4	1	1	-	1	4	1	41	I (98)	90	2	5
		T.T......		U (1)	-	-	-	-	-	-	-	-	-	-	-	-	-	-	1	-	-	-		X (0)	-	-	-
		.R.......		U (1)	-	-	-	-	-	-	-	-	-	-	1	-	-	-	-	-	-	-		X (0)	-	-	-
		........I		U (1)	-	-	-	-	-	-	-	-	-	-	-	-	-	1	-	-	-	-		X (0)	-	-	-
		.....K...		X (0)	-	-	-	-	-	-	-	-	-	-	-	-	-	-	-	-	-	-		U (2)	2	-	-
PB2	660 - 668	KATKRLTVL	81	I (96)	32	16	15	4	2	1	1	1	1	7	2	4	1	1	-	1	4	1	41	I (95)	90	2	2
		.......I.		U (1)	-	-	-	-	-	-	-	-	-	-	-	-	-	1	-	-	-	-		X (0)	-	-	-
		.T.......		U (1)	-	-	-	-	-	-	-	-	-	-	-	-	-	-	1	-	-	-		X (0)	-	-	-
		R........		U (1)	-	-	-	-	-	-	-	-	-	-	1	-	-	-	-	-	-	-		X (0)	-	-	-
		........F		X (0)	-	-	-	-	-	-	-	-	-	-	-	-	-	-	-	-	-	-		U (2)	-	-	2
		....K....		X (0)	-	-	-	-	-	-	-	-	-	-	-	-	-	-	-	-	-	-		U (2)	2	-	-
PB2	661 - 669	ATKRLTVLG	81	I (98)	32	16	15	4	2	1	1	1	1	7	4	4	1	1	-	1	4	1	41	I (95)	90	2	2
		T........		U (1)	-	-	-	-	-	-	-	-	-	-	-	-	-	-	1	-	-	-		X (0)	-	-	-
		......I..		U (1)	-	-	-	-	-	-	-	-	-	-	-	-	-	1	-	-	-	-		X (0)	-	-	-
		.......F.		X (0)	-	-	-	-	-	-	-	-	-	-	-	-	-	-	-	-	-	-		U (2)	-	-	2
		...K.....		X (0)	-	-	-	-	-	-	-	-	-	-	-	-	-	-	-	-	-	-		U (2)	2	-	-
PB2	662 - 670	TKRLTVLGK	81	I (99)	32	16	15	4	2	1	1	1	1	7	4	4	1	1	1	1	4	1	41	I (95)	90	2	2
		.....I...		U (1)	-	-	-	-	-	-	-	-	-	-	-	-	-	1	-	-	-	-		X (0)	-	-	-
		..K......		X (0)	-	-	-	-	-	-	-	-	-	-	-	-	-	-	-	-	-	-		U (2)	2	-	-
		......F..		X (0)	-	-	-	-	-	-	-	-	-	-	-	-	-	-	-	-	-	-		U (2)	-	-	2
PB2	663 - 671	KRLTVLGKD	81	I (99)	32	16	15	4	2	1	1	1	1	7	4	4	1	1	1	1	4	1	41	I (95)	90	2	2
		....I....		U (1)	-	-	-	-	-	-	-	-	-	-	-	-	-	1	-	-	-	-		X (0)	-	-	-
		.K.......		X (0)	-	-	-	-	-	-	-	-	-	-	-	-	-	-	-	-	-	-		U (2)	2	-	-
		.....F...		X (0)	-	-	-	-	-	-	-	-	-	-	-	-	-	-	-	-	-	-		U (2)	-	-	2
PB2	664 - 672	RLTVLGKDA	81	I (99)	32	16	15	4	2	1	1	1	1	7	4	4	1	1	1	1	4	1	41	I (95)	90	2	2
		...I.....		U (1)	-	-	-	-	-	-	-	-	-	-	-	-	-	1	-	-	-	-		X (0)	-	-	-
		K........		X (0)	-	-	-	-	-	-	-	-	-	-	-	-	-	-	-	-	-	-		U (2)	2	-	-
		....F....		X (0)	-	-	-	-	-	-	-	-	-	-	-	-	-	-	-	-	-	-		U (2)	-	-	2
PB2	665 - 673	LTVLGKDAG	81	I (99)	32	16	15	4	2	1	1	1	1	7	4	4	1	1	1	1	4	1	41	I (98)	93	2	2
		..I......		U (1)	-	-	-	-	-	-	-	-	-	-	-	-	-	1	-	-	-	-		X (0)	-	-	-
		...F.....		X (0)	-	-	-	-	-	-	-	-	-	-	-	-	-	-	-	-	-	-		U (2)	-	-	2
PB2	666 - 674	TVLGKDAGA	81	I (99)	32	16	15	4	2	1	1	1	1	7	4	4	1	1	1	1	4	1	41	I (98)	93	2	2
		.I.......		U (1)	-	-	-	-	-	-	-	-	-	-	-	-	-	1	-	-	-	-		X (0)	-	-	-
		..F......		X (0)	-	-	-	-	-	-	-	-	-	-	-	-	-	-	-	-	-	-		U (2)	-	-	2
PB2	667 - 675	VLGKDAGAL	81	I (99)	32	16	15	4	2	1	1	1	1	7	4	4	1	1	1	1	4	1	41	I (98)	93	2	2
		I........		U (1)	-	-	-	-	-	-	-	-	-	-	-	-	-	1	-	-	-	-		X (0)	-	-	-
		.F.......		X (0)	-	-	-	-	-	-	-	-	-	-	-	-	-	-	-	-	-	-		U (2)	-	-	2
PB2	668 - 676	LGKDAGALT	81	I (57)	-	14	15	-	-	1	-	1	-	7	4	4	1	2	1	1	4	1	41	X (0)	-	-	-
		........M		Ma (43)	32	2	-	4	2	-	1	-	1	-	-	-	-	-	-	-	-	-		I (85)	83	-	2
		........V		X (0)	-	-	-	-	-	-	-	-	-	-	-	-	-	-	-	-	-	-		Ma (12)	10	2	-
		F.......M		X (0)	-	-	-	-	-	-	-	-	-	-	-	-	-	-	-	-	-	-		U (2)	-	-	2
PB2	669 - 677	GKDAGALTE	81	I (57)	-	14	15	-	-	1	-	1	-	7	4	4	1	2	1	1	4	1	41	X (0)	-	-	-
		.......M.		Ma (43)	32	2	-	4	2	-	1	-	1	-	-	-	-	-	-	-	-	-		I (88)	83	-	5
		.......V.		X (0)	-	-	-	-	-	-	-	-	-	-	-	-	-	-	-	-	-	-		Ma (12)	10	2	-
PB2	670 - 678	KDAGALTED	81	I (57)	-	14	15	-	-	1	-	1	-	7	4	4	1	2	1	1	4	1	41	X (0)	-	-	-
		......M..		Ma (43)	32	2	-	4	2	-	1	-	1	-	-	-	-	-	-	-	-	-		I (88)	83	-	5
		......V..		X (0)	-	-	-	-	-	-	-	-	-	-	-	-	-	-	-	-	-	-		Ma (12)	10	2	-
PB2	671 - 679	DAGALTEDP	81	I (56)	-	14	15	-	-	1	-	1	-	7	4	4	1	2	1	-	4	1	41	X (0)	-	-	-
		.....M...		Ma (43)	32	2	-	4	2	-	1	-	1	-	-	-	-	-	-	-	-	-		I (88)	83	-	5
		........S		U (1)	-	-	-	-	-	-	-	-	-	-	-	-	-	-	-	1	-	-		X (0)	-	-	-
		.....V...		X (0)	-	-	-	-	-	-	-	-	-	-	-	-	-	-	-	-	-	-		Ma (12)	10	2	-
PB2	672 - 680	AGALTEDPD	81	I (56)	-	14	15	-	-	1	-	1	-	7	4	4	1	2	1	-	4	1	41	X (0)	-	-	-
		....M....		Ma (43)	32	2	-	4	2	-	1	-	1	-	-	-	-	-	-	-	-	-		I (88)	83	-	5
		.......S.		U (1)	-	-	-	-	-	-	-	-	-	-	-	-	-	-	-	1	-	-		X (0)	-	-	-
		....V....		X (0)	-	-	-	-	-	-	-	-	-	-	-	-	-	-	-	-	-	-		Ma (12)	10	2	-
PB2	673 - 681	GALTEDPDE	81	I (56)	-	14	15	-	-	1	-	1	-	7	4	4	1	2	1	-	4	1	41	X (0)	-	-	-
		...M.....		Ma (43)	32	2	-	4	2	-	1	-	1	-	-	-	-	-	-	-	-	-		I (88)	83	-	5
		......S..		U (1)	-	-	-	-	-	-	-	-	-	-	-	-	-	-	-	1	-	-		X (0)	-	-	-
		...V.....		X (0)	-	-	-	-	-	-	-	-	-	-	-	-	-	-	-	-	-	-		Ma (12)	10	2	-
PB2	674 - 682	ALTEDPDEG	81	I (56)	-	14	15	-	-	1	-	1	-	7	4	4	1	2	1	-	4	1	41	X (0)	-	-	-
		..M......		Ma (43)	32	2	-	4	2	-	1	-	1	-	-	-	-	-	-	-	-	-		I (88)	83	-	5
		.....S...		U (1)	-	-	-	-	-	-	-	-	-	-	-	-	-	-	-	1	-	-		X (0)	-	-	-
		..V......		X (0)	-	-	-	-	-	-	-	-	-	-	-	-	-	-	-	-	-	-		Ma (12)	10	2	-
PB2	675 - 683	LTEDPDEGT	81	I (56)	-	14	15	-	-	1	-	1	-	7	4	4	1	2	1	-	4	1	41	X (0)	-	-	-
		.M.......		Ma (43)	32	2	-	4	2	-	1	-	1	-	-	-	-	-	-	-	-	-		I (88)	83	-	5
		....S....		U (1)	-	-	-	-	-	-	-	-	-	-	-	-	-	-	-	1	-	-		X (0)	-	-	-
		.V.......		X (0)	-	-	-	-	-	-	-	-	-	-	-	-	-	-	-	-	-	-		Ma (12)	10	2	-
PB2	676 - 684	TEDPDEGTA	81	I (56)	-	14	15	-	-	1	-	1	-	7	4	4	1	2	1	-	4	1	41	X (0)	-	-	-
		M........		Ma (43)	32	2	-	4	2	-	1	-	1	-	-	-	-	-	-	-	-	-		I (88)	83	-	5
		...S.....		U (1)	-	-	-	-	-	-	-	-	-	-	-	-	-	-	-	1	-	-		X (0)	-	-	-
		V........		X (0)	-	-	-	-	-	-	-	-	-	-	-	-	-	-	-	-	-	-		Ma (12)	10	2	-
PB2	677 - 685	EDPDEGTAG	81	I (99)	32	16	15	4	2	1	1	1	1	7	4	4	1	2	1	-	4	1	41	I (100)	93	2	5
		..S......		U (1)	-	-	-	-	-	-	-	-	-	-	-	-	-	-	-	1	-	-		X (0)	-	-	-
PB2	678 - 686	DPDEGTAGV	81	I (99)	32	16	15	4	2	1	1	1	1	7	4	4	1	2	1	-	4	1	41	I (100)	93	2	5
		.S.......		U (1)	-	-	-	-	-	-	-	-	-	-	-	-	-	-	-	1	-	-		X (0)	-	-	-
PB2	679 - 687	PDEGTAGVE	81	I (99)	32	16	15	4	2	1	1	1	1	7	4	4	1	2	1	-	4	1	41	I (100)	93	2	5
		S........		U (1)	-	-	-	-	-	-	-	-	-	-	-	-	-	-	-	1	-	-		X (0)	-	-	-
PB2	680 - 688	DEGTAGVES	81	I (100)	32	16	15	4	2	1	1	1	1	7	4	4	1	2	1	1	4	1	41	I (100)	93	2	5
PB2	681 - 689	EGTAGVESA	81	I (100)	32	16	15	4	2	1	1	1	1	7	4	4	1	2	1	1	4	1	41	I (100)	93	2	5
PB2	682 - 690	GTAGVESAV	81	I (100)	32	16	15	4	2	1	1	1	1	7	4	4	1	2	1	1	4	1	41	I (100)	93	2	5
PB2	683 - 691	TAGVESAVL	81	I (100)	32	16	15	4	2	1	1	1	1	7	4	4	1	2	1	1	4	1	41	I (100)	93	2	5
PB2	684 - 692	AGVESAVLR	81	I (100)	32	16	15	4	2	1	1	1	1	7	4	4	1	2	1	1	4	1	41	I (100)	93	2	5
PB2	685 - 693	GVESAVLRG	81	I (100)	32	16	15	4	2	1	1	1	1	7	4	4	1	2	1	1	4	1	41	I (100)	93	2	5
PB2	686 - 694	VESAVLRGF	81	I (100)	32	16	15	4	2	1	1	1	1	7	4	4	1	2	1	1	4	1	41	I (100)	93	2	5
PB2	687 - 695	ESAVLRGFL	81	I (100)	32	16	15	4	2	1	1	1	1	7	4	4	1	2	1	1	4	1	41	I (100)	93	2	5
PB2	688 - 696	SAVLRGFLI	81	I (100)	32	16	15	4	2	1	1	1	1	7	4	4	1	2	1	1	4	1	41	I (100)	93	2	5
PB2	689 - 697	AVLRGFLIL	81	I (100)	32	16	15	4	2	1	1	1	1	7	4	4	1	2	1	1	4	1	41	I (100)	93	2	5
PB2	690 - 698	VLRGFLILG	81	I (100)	32	16	15	4	2	1	1	1	1	7	4	4	1	2	1	1	4	1	41	I (100)	93	2	5
PB2	691 - 699	LRGFLILGK	81	I (100)	32	16	15	4	2	1	1	1	1	7	4	4	1	2	1	1	4	1	41	I (100)	93	2	5
PB2	692 - 700	RGFLILGKE	81	I (100)	32	16	15	4	2	1	1	1	1	7	4	4	1	2	1	1	4	1	41	I (100)	93	2	5
PB2	693 - 701	GFLILGKED	81	I (100)	32	16	15	4	2	1	1	1	1	7	4	4	1	2	1	1	4	1	40	I (95)	88	3	5
		........N		X (0)	-	-	-	-	-	-	-	-	-	-	-	-	-	-	-	-	-	-		Ma (5)	5	-	-
PB2	694 - 702	FLILGKEDK	81	I (99)	31	16	15	4	2	1	1	1	1	7	4	4	1	2	1	1	4	1	40	I (95)	88	3	5
		........R		U (1)	1	-	-	-	-	-	-	-	-	-	-	-	-	-	-	-	-	-		X (0)	-	-	-
		.......N.		X (0)	-	-	-	-	-	-	-	-	-	-	-	-	-	-	-	-	-	-		Ma (5)	5	-	-
PB2	695 - 703	LILGKEDKR	81	I (99)	31	16	15	4	2	1	1	1	1	7	4	4	1	2	1	1	4	1	40	I (95)	88	3	5
		.......R.		U (1)	1	-	-	-	-	-	-	-	-	-	-	-	-	-	-	-	-	-		X (0)	-	-	-
		......N..		X (0)	-	-	-	-	-	-	-	-	-	-	-	-	-	-	-	-	-	-		Ma (5)	5	-	-
PB2	696 - 704	ILGKEDKRY	81	I (99)	31	16	15	4	2	1	1	1	1	7	4	4	1	2	1	1	4	1	40	I (95)	88	3	5
		......R..		U (1)	1	-	-	-	-	-	-	-	-	-	-	-	-	-	-	-	-	-		X (0)	-	-	-
		.....N...		X (0)	-	-	-	-	-	-	-	-	-	-	-	-	-	-	-	-	-	-		Ma (5)	5	-	-
PB2	697 - 705	LGKEDKRYG	81	I (99)	31	16	15	4	2	1	1	1	1	7	4	4	1	2	1	1	4	1	40	I (95)	88	3	5
		.....R...		U (1)	1	-	-	-	-	-	-	-	-	-	-	-	-	-	-	-	-	-		X (0)	-	-	-
		....N....		X (0)	-	-	-	-	-	-	-	-	-	-	-	-	-	-	-	-	-	-		Ma (5)	5	-	-
PB2	698 - 706	GKEDKRYGP	81	I (99)	31	16	15	4	2	1	1	1	1	7	4	4	1	2	1	1	4	1	40	I (95)	88	3	5
		....R....		U (1)	1	-	-	-	-	-	-	-	-	-	-	-	-	-	-	-	-	-		X (0)	-	-	-
		...N.....		X (0)	-	-	-	-	-	-	-	-	-	-	-	-	-	-	-	-	-	-		Ma (5)	5	-	-
PB2	699 - 707	KEDKRYGPA	81	I (99)	31	16	15	4	2	1	1	1	1	7	4	4	1	2	1	1	4	1	40	I (95)	88	3	5
		...R.....		U (1)	1	-	-	-	-	-	-	-	-	-	-	-	-	-	-	-	-	-		X (0)	-	-	-
		..N......		X (0)	-	-	-	-	-	-	-	-	-	-	-	-	-	-	-	-	-	-		Ma (5)	5	-	-
PB2	700 - 708	EDKRYGPAL	81	I (99)	31	16	15	4	2	1	1	1	1	7	4	4	1	2	1	1	4	1	40	I (95)	88	3	5
		..R......		U (1)	1	-	-	-	-	-	-	-	-	-	-	-	-	-	-	-	-	-		X (0)	-	-	-
		.N.......		X (0)	-	-	-	-	-	-	-	-	-	-	-	-	-	-	-	-	-	-		Ma (5)	5	-	-
PB2	701 - 709	DKRYGPALS	81	I (99)	31	16	15	4	2	1	1	1	1	7	4	4	1	2	1	1	4	1	40	I (95)	88	3	5
		.R.......		U (1)	1	-	-	-	-	-	-	-	-	-	-	-	-	-	-	-	-	-		X (0)	-	-	-
		N........		X (0)	-	-	-	-	-	-	-	-	-	-	-	-	-	-	-	-	-	-		Ma (5)	5	-	-
PB2	702 - 710	KRYGPALSI	81	I (99)	31	16	15	4	2	1	1	1	1	7	4	4	1	2	1	1	4	1	41	I (100)	93	2	5
		R........		U (1)	1	-	-	-	-	-	-	-	-	-	-	-	-	-	-	-	-	-		X (0)	-	-	-
PB2	703 - 711	RYGPALSIN	81	I (100)	32	16	15	4	2	1	1	1	1	7	4	4	1	2	1	1	4	1	41	I (100)	93	2	5
PB2	704 - 712	YGPALSINE	81	I (100)	32	16	15	4	2	1	1	1	1	7	4	4	1	2	1	1	4	1	41	I (100)	93	2	5
PB2	705 - 713	GPALSINEL	81	I (100)	32	16	15	4	2	1	1	1	1	7	4	4	1	2	1	1	4	1	41	I (100)	93	2	5
PB2	706 - 714	PALSINELS	81	I (95)	32	16	15	4	2	1	1	1	1	2	4	4	1	2	1	1	4	1	41	I (100)	93	2	5
		........G		Ma (5)	-	-	-	-	-	-	-	-	-	5	-	-	-	-	-	-	-	-		X (0)	-	-	-
PB2	707 - 715	ALSINELSN	81	I (93)	32	16	14	4	2	1	1	1	1	2	2	4	1	2	1	1	4	1	41	I (100)	93	2	5
		.......G.		Ma (5)	-	-	-	-	-	-	-	-	-	5	-	-	-	-	-	-	-	-		X (0)	-	-	-
		........T		U (1)	-	-	1	-	-	-	-	-	-	-	-	-	-	-	-	-	-	-		X (0)	-	-	-
		........S		U (1)	-	-	-	-	-	-	-	-	-	-	1	-	-	-	-	-	-	-		X (0)	-	-	-
PB2	708 - 716	LSINELSNL	81	I (93)	32	16	14	4	2	1	1	1	1	2	2	4	1	2	1	1	4	1	41	I (100)	93	2	5
		......G..		Ma (5)	-	-	-	-	-	-	-	-	-	5	-	-	-	-	-	-	-	-		X (0)	-	-	-
		.......S.		U (1)	-	-	-	-	-	-	-	-	-	-	1	-	-	-	-	-	-	-		X (0)	-	-	-
		.......T.		U (1)	-	-	1	-	-	-	-	-	-	-	-	-	-	-	-	-	-	-		X (0)	-	-	-
PB2	709 - 717	SINELSNLA	81	I (93)	32	16	14	4	2	1	1	1	1	2	2	4	1	2	1	1	4	1	41	I (100)	93	2	5
		.....G...		Ma (5)	-	-	-	-	-	-	-	-	-	5	-	-	-	-	-	-	-	-		X (0)	-	-	-
		......T..		U (1)	-	-	1	-	-	-	-	-	-	-	-	-	-	-	-	-	-	-		X (0)	-	-	-
		......S..		U (1)	-	-	-	-	-	-	-	-	-	-	1	-	-	-	-	-	-	-		X (0)	-	-	-
PB2	710 - 718	INELSNLAK	81	I (91)	32	16	14	4	2	1	1	1	1	2	2	4	1	2	1	-	4	1	41	I (100)	93	2	5
		....G....		Ma (5)	-	-	-	-	-	-	-	-	-	5	-	-	-	-	-	-	-	-		X (0)	-	-	-
		.....S...		U (1)	-	-	-	-	-	-	-	-	-	-	1	-	-	-	-	-	-	-		X (0)	-	-	-
		.....T...		U (1)	-	-	1	-	-	-	-	-	-	-	-	-	-	-	-	-	-	-		X (0)	-	-	-
		........R		U (1)	-	-	-	-	-	-	-	-	-	-	-	-	-	-	-	1	-	-		X (0)	-	-	-
PB2	711 - 719	NELSNLAKG	81	I (91)	32	16	14	4	2	1	1	1	1	2	2	4	1	2	1	-	4	1	41	I (100)	93	2	5
		...G.....		Ma (5)	-	-	-	-	-	-	-	-	-	5	-	-	-	-	-	-	-	-		X (0)	-	-	-
		....S....		U (1)	-	-	-	-	-	-	-	-	-	-	1	-	-	-	-	-	-	-		X (0)	-	-	-
		....T....		U (1)	-	-	1	-	-	-	-	-	-	-	-	-	-	-	-	-	-	-		X (0)	-	-	-
		.......R.		U (1)	-	-	-	-	-	-	-	-	-	-	-	-	-	-	-	1	-	-		X (0)	-	-	-
PB2	712 - 720	ELSNLAKGE	81	I (91)	32	16	14	4	2	1	1	1	1	2	2	4	1	2	1	-	4	1	41	I (100)	93	2	5
		..G......		Ma (5)	-	-	-	-	-	-	-	-	-	5	-	-	-	-	-	-	-	-		X (0)	-	-	-
		...T.....		U (1)	-	-	1	-	-	-	-	-	-	-	-	-	-	-	-	-	-	-		X (0)	-	-	-
		......R..		U (1)	-	-	-	-	-	-	-	-	-	-	-	-	-	-	-	1	-	-		X (0)	-	-	-
		...S.....		U (1)	-	-	-	-	-	-	-	-	-	-	1	-	-	-	-	-	-	-		X (0)	-	-	-
PB2	713 - 721	LSNLAKGEK	81	I (91)	32	16	14	4	2	1	1	1	1	2	2	4	1	2	1	-	4	1	41	I (100)	93	2	5
		.G.......		Ma (5)	-	-	-	-	-	-	-	-	-	5	-	-	-	-	-	-	-	-		X (0)	-	-	-
		..T......		U (1)	-	-	1	-	-	-	-	-	-	-	-	-	-	-	-	-	-	-		X (0)	-	-	-
		..S......		U (1)	-	-	-	-	-	-	-	-	-	-	1	-	-	-	-	-	-	-		X (0)	-	-	-
		.....R...		U (1)	-	-	-	-	-	-	-	-	-	-	-	-	-	-	-	1	-	-		X (0)	-	-	-
PB2	714 - 722	SNLAKGEKA	81	I (91)	32	16	14	4	2	1	1	1	1	2	2	4	1	2	1	-	4	1	41	I (100)	93	2	5
		G........		Ma (5)	-	-	-	-	-	-	-	-	-	5	-	-	-	-	-	-	-	-		X (0)	-	-	-
		....R....		U (1)	-	-	-	-	-	-	-	-	-	-	-	-	-	-	-	1	-	-		X (0)	-	-	-
		.S.......		U (1)	-	-	-	-	-	-	-	-	-	-	1	-	-	-	-	-	-	-		X (0)	-	-	-
		.T.......		U (1)	-	-	1	-	-	-	-	-	-	-	-	-	-	-	-	-	-	-		X (0)	-	-	-
PB2	715 - 723	NLAKGEKAN	81	I (96)	32	16	14	4	2	1	1	1	1	7	2	4	1	2	1	-	4	1	41	I (100)	93	2	5
		T........		U (1)	-	-	1	-	-	-	-	-	-	-	-	-	-	-	-	-	-	-		X (0)	-	-	-
		S........		U (1)	-	-	-	-	-	-	-	-	-	-	1	-	-	-	-	-	-	-		X (0)	-	-	-
		...R.....		U (1)	-	-	-	-	-	-	-	-	-	-	-	-	-	-	-	1	-	-		X (0)	-	-	-
PB2	716 - 724	LAKGEKANV	81	I (99)	32	16	15	4	2	1	1	1	1	7	4	4	1	2	1	-	4	1	41	I (100)	93	2	5
		..R......		U (1)	-	-	-	-	-	-	-	-	-	-	-	-	-	-	-	1	-	-		X (0)	-	-	-
PB2	717 - 725	AKGEKANVL	81	I (99)	32	16	15	4	2	1	1	1	1	7	4	4	1	2	1	-	4	1	41	I (100)	93	2	5
		.R.......		U (1)	-	-	-	-	-	-	-	-	-	-	-	-	-	-	-	1	-	-		X (0)	-	-	-
PB2	718 - 726	KGEKANVLI	81	I (99)	32	16	15	4	2	1	1	1	1	7	4	4	1	2	1	-	4	1	41	I (100)	93	2	5
		R........		U (1)	-	-	-	-	-	-	-	-	-	-	-	-	-	-	-	1	-	-		X (0)	-	-	-
PB2	719 - 727	GEKANVLIG	81	I (100)	32	16	15	4	2	1	1	1	1	7	4	4	1	2	1	1	4	1	41	I (100)	93	2	5
PB2	720 - 728	EKANVLIGQ	81	I (100)	32	16	15	4	2	1	1	1	1	7	4	4	1	2	1	1	4	1	41	I (100)	93	2	5
PB2	721 - 729	KANVLIGQG	81	I (100)	32	16	15	4	2	1	1	1	1	7	4	4	1	2	1	1	4	1	41	I (100)	93	2	5
PB2	722 - 730	ANVLIGQGD	81	I (100)	32	16	15	4	2	1	1	1	1	7	4	4	1	2	1	1	4	1	41	I (100)	93	2	5
PB2	723 - 731	NVLIGQGDV	81	I (100)	32	16	15	4	2	1	1	1	1	7	4	4	1	2	1	1	4	1	41	I (100)	93	2	5
PB2	724 - 732	VLIGQGDVV	81	I (100)	32	16	15	4	2	1	1	1	1	7	4	4	1	2	1	1	4	1	41	I (100)	93	2	5
PB2	725 - 733	LIGQGDVVL	81	I (100)	32	16	15	4	2	1	1	1	1	7	4	4	1	2	1	1	4	1	41	I (100)	93	2	5
PB2	726 - 734	IGQGDVVLV	81	I (100)	32	16	15	4	2	1	1	1	1	7	4	4	1	2	1	1	4	1	41	I (100)	93	2	5
PB2	727 - 735	GQGDVVLVM	81	I (100)	32	16	15	4	2	1	1	1	1	7	4	4	1	2	1	1	4	1	41	I (100)	93	2	5
PB2	728 - 736	QGDVVLVMK	81	I (100)	32	16	15	4	2	1	1	1	1	7	4	4	1	2	1	1	4	1	41	I (98)	90	2	5
		........E		X (0)	-	-	-	-	-	-	-	-	-	-	-	-	-	-	-	-	-	-		U (2)	2	-	-
PB2	729 - 737	GDVVLVMKR	81	I (100)	32	16	15	4	2	1	1	1	1	7	4	4	1	2	1	1	4	1	41	I (98)	90	2	5
		.......E.		X (0)	-	-	-	-	-	-	-	-	-	-	-	-	-	-	-	-	-	-		U (2)	2	-	-
PB2	730 - 738	DVVLVMKRK	81	I (100)	32	16	15	4	2	1	1	1	1	7	4	4	1	2	1	1	4	1	41	I (98)	90	2	5
		......E..		X (0)	-	-	-	-	-	-	-	-	-	-	-	-	-	-	-	-	-	-		U (2)	2	-	-
PB2	731 - 739	VVLVMKRKR	81	I (100)	32	16	15	4	2	1	1	1	1	7	4	4	1	2	1	1	4	1	41	I (98)	90	2	5
		.....E...		X (0)	-	-	-	-	-	-	-	-	-	-	-	-	-	-	-	-	-	-		U (2)	2	-	-
PB2	732 - 740	VLVMKRKRD	81	I (100)	32	16	15	4	2	1	1	1	1	7	4	4	1	2	1	1	4	1	41	I (93)	85	2	5
		........A		X (0)	-	-	-	-	-	-	-	-	-	-	-	-	-	-	-	-	-	-		Ma (5)	5	-	-
		....E....		X (0)	-	-	-	-	-	-	-	-	-	-	-	-	-	-	-	-	-	-		U (2)	2	-	-
PB2	733 - 741	LVMKRKRDS	81	I (100)	32	16	15	4	2	1	1	1	1	7	4	4	1	2	1	1	4	1	41	I (93)	85	2	5
		.......A.		X (0)	-	-	-	-	-	-	-	-	-	-	-	-	-	-	-	-	-	-		Ma (5)	5	-	-
		...E.....		X (0)	-	-	-	-	-	-	-	-	-	-	-	-	-	-	-	-	-	-		U (2)	2	-	-
PB2	734 - 742	VMKRKRDSS	81	I (100)	32	16	15	4	2	1	1	1	1	7	4	4	1	2	1	1	4	1	41	I (93)	85	2	5
		......A..		X (0)	-	-	-	-	-	-	-	-	-	-	-	-	-	-	-	-	-	-		Ma (5)	5	-	-
		..E.....F		X (0)	-	-	-	-	-	-	-	-	-	-	-	-	-	-	-	-	-	-		U (2)	2	-	-
PB2	735 - 743	MKRKRDSSI	81	I (100)	32	16	15	4	2	1	1	1	1	7	4	4	1	2	1	1	4	1	41	I (93)	85	2	5
		.....A...		X (0)	-	-	-	-	-	-	-	-	-	-	-	-	-	-	-	-	-	-		Ma (5)	5	-	-
		.E.....FL		X (0)	-	-	-	-	-	-	-	-	-	-	-	-	-	-	-	-	-	-		U (2)	2	-	-
PB2	736 - 744	KRKRDSSIL	81	I (100)	32	16	15	4	2	1	1	1	1	7	4	4	1	2	1	1	4	1	41	I (93)	85	2	5
		....A....		X (0)	-	-	-	-	-	-	-	-	-	-	-	-	-	-	-	-	-	-		Ma (5)	5	-	-
		E.....FL.		X (0)	-	-	-	-	-	-	-	-	-	-	-	-	-	-	-	-	-	-		U (2)	2	-	-
PB2	737 - 745	RKRDSSILT	81	I (100)	32	16	15	4	2	1	1	1	1	7	4	4	1	2	1	1	4	1	41	I (93)	85	2	5
		...A.....		X (0)	-	-	-	-	-	-	-	-	-	-	-	-	-	-	-	-	-	-		Ma (5)	5	-	-
		.....FL..		X (0)	-	-	-	-	-	-	-	-	-	-	-	-	-	-	-	-	-	-		U (2)	2	-	-
PB2	738 - 746	KRDSSILTD	81	I (100)	32	16	15	4	2	1	1	1	1	7	4	4	1	2	1	1	4	1	41	I (93)	85	2	5
		..A......		X (0)	-	-	-	-	-	-	-	-	-	-	-	-	-	-	-	-	-	-		Ma (5)	5	-	-
		....FL...		X (0)	-	-	-	-	-	-	-	-	-	-	-	-	-	-	-	-	-	-		U (2)	2	-	-
PB2	739 - 747	RDSSILTDS	81	I (100)	32	16	15	4	2	1	1	1	1	7	4	4	1	2	1	1	4	1	41	I (93)	85	2	5
		.A.......		X (0)	-	-	-	-	-	-	-	-	-	-	-	-	-	-	-	-	-	-		Ma (5)	5	-	-
		...FL....		X (0)	-	-	-	-	-	-	-	-	-	-	-	-	-	-	-	-	-	-		U (2)	2	-	-
PB2	740 - 748	DSSILTDSQ	81	I (100)	32	16	15	4	2	1	1	1	1	7	4	4	1	2	1	1	4	1	41	I (93)	85	2	5
		A........		X (0)	-	-	-	-	-	-	-	-	-	-	-	-	-	-	-	-	-	-		Ma (5)	5	-	-
		..FL.....		X (0)	-	-	-	-	-	-	-	-	-	-	-	-	-	-	-	-	-	-		U (2)	2	-	-
PB2	741 - 749	SSILTDSQT	81	I (100)	32	16	15	4	2	1	1	1	1	7	4	4	1	2	1	1	4	1	41	I (98)	90	2	5
		.FL......		X (0)	-	-	-	-	-	-	-	-	-	-	-	-	-	-	-	-	-	-		U (2)	2	-	-
PB2	742 - 750	SILTDSQTA	81	I (100)	32	16	15	4	2	1	1	1	1	7	4	4	1	2	1	1	4	1	41	I (98)	90	2	5
		FL.......		X (0)	-	-	-	-	-	-	-	-	-	-	-	-	-	-	-	-	-	-		U (2)	2	-	-
PB2	743 - 751	ILTDSQTAT	81	I (100)	32	16	15	4	2	1	1	1	1	7	4	4	1	2	1	1	4	1	41	I (98)	90	2	5
		L........		X (0)	-	-	-	-	-	-	-	-	-	-	-	-	-	-	-	-	-	-		U (2)	2	-	-
PB2	744 - 752	LTDSQTATK	81	I (100)	32	16	15	4	2	1	1	1	1	7	4	4	1	2	1	1	4	1	41	I (100)	93	2	5
PB2	745 - 753	TDSQTATKR	81	I (100)	32	16	15	4	2	1	1	1	1	7	4	4	1	2	1	1	4	1	41	I (100)	93	2	5
PB2	746 - 754	DSQTATKRI	81	I (100)	32	16	15	4	2	1	1	1	1	7	4	4	1	2	1	1	4	1	41	I (100)	93	2	5
PB2	747 - 755	SQTATKRIR	81	I (100)	32	16	15	4	2	1	1	1	1	7	4	4	1	2	1	1	4	1	41	I (100)	93	2	5
PB2	748 - 756	QTATKRIRM	81	I (100)	32	16	15	4	2	1	1	1	1	7	4	4	1	2	1	1	4	1	41	I (100)	93	2	5
PB2	749 - 757	TATKRIRMA	80	I (100)	33	15	15	4	3	1	1	1	1	8	4	4	1	3	1	1	4	1	41	I (100)	93	2	5
PB2	750 - 758	ATKRIRMAI	75	I (100)	35	16	15	4	3	1	1	1	1	8	4	4	1	3	1	1	-	-	41	I (100)	93	2	5
PB2	751 - 759	TKRIRMAIN	75	I (100)	35	16	15	4	3	1	1	1	1	8	4	4	1	3	1	1	-	-	40	I (98)	90	3	5
		........Q		X (0)	-	-	-	-	-	-	-	-	-	-	-	-	-	-	-	-	-	-		U (3)	3	-	-
PB1	1 - 9	MDVNPTLLF	74	I (99)	35	18	15	4	1	1	1	1	1	3	4	3	-	3	1	1	4	1	29	I (97)	93	3	-
		...TS....		U (1)	-	-	-	-	1	-	-	-	-	-	-	-	-	-	-	-	-	-		X (0)	-	-	-
		...H.....		X (0)	-	-	-	-	-	-	-	-	-	-	-	-	-	-	-	-	-	-		U (3)	3	-	-
PB1	2 - 10	DVNPTLLFL	75	I (99)	35	17	16	4	1	1	1	1	1	3	4	3	-	3	1	1	4	1	30	I (97)	93	3	-
		..TS.....		U (1)	-	-	-	-	1	-	-	-	-	-	-	-	-	-	-	-	-	-		X (0)	-	-	-
		..H......		X (0)	-	-	-	-	-	-	-	-	-	-	-	-	-	-	-	-	-	-		U (3)	3	-	-
PB1	3 - 11	VNPTLLFLK	75	I (99)	35	17	16	4	1	1	1	1	1	3	4	3	-	3	1	1	4	1	32	I (97)	94	3	-
		.TS......		U (1)	-	-	-	-	1	-	-	-	-	-	-	-	-	-	-	-	-	-		X (0)	-	-	-
		.H.......		X (0)	-	-	-	-	-	-	-	-	-	-	-	-	-	-	-	-	-	-		U (3)	3	-	-
PB1	4 - 12	NPTLLFLKV	75	I (99)	35	17	16	4	1	1	1	1	1	3	4	3	-	3	1	1	4	1	32	I (97)	94	3	-
		TS.......		U (1)	-	-	-	-	1	-	-	-	-	-	-	-	-	-	-	-	-	-		X (0)	-	-	-
		H........		X (0)	-	-	-	-	-	-	-	-	-	-	-	-	-	-	-	-	-	-		U (3)	3	-	-
PB1	5 - 13	PTLLFLKVP	75	I (99)	35	17	16	4	1	1	1	1	1	3	4	3	-	3	1	1	4	1	33	I (100)	94	3	3
		S........		U (1)	-	-	-	-	1	-	-	-	-	-	-	-	-	-	-	-	-	-		X (0)	-	-	-
PB1	6 - 14	TLLFLKVPA	75	I (53)	-	15	16	-	-	1	-	1	-	3	4	3	-	3	1	1	4	1	34	X (0)	-	-	-
		........V		Ma (47)	35	3	-	4	3	-	1	-	1	-	-	-	-	-	-	-	-	-		I (100)	91	3	6
PB1	7 - 15	LLFLKVPAQ	75	I (53)	-	15	16	-	-	1	-	1	-	3	4	3	-	3	1	1	4	1	34	X (0)	-	-	-
		.......V.		Ma (47)	35	3	-	4	3	-	1	-	1	-	-	-	-	-	-	-	-	-		I (100)	91	3	6
PB1	8 - 16	LFLKVPAQN	75	I (52)	-	15	16	-	-	1	-	1	-	3	4	3	-	1	1	1	4	1	34	X (0)	-	-	-
		......V..		Ma (47)	35	3	-	4	3	-	1	-	1	-	-	-	-	-	-	-	-	-		I (100)	91	3	6
		........D		U (1)	-	-	-	-	-	-	-	-	-	-	-	-	-	1	-	-	-	-		X (0)	-	-	-
PB1	9 - 17	FLKVPAQNA	75	I (52)	-	15	16	-	-	1	-	1	-	3	4	3	-	1	1	1	4	1	34	X (0)	-	-	-
		.....V...		Ma (47)	35	3	-	4	3	-	1	-	1	-	-	-	-	-	-	-	-	-		I (100)	91	3	6
		.......D.		U (1)	-	-	-	-	-	-	-	-	-	-	-	-	-	1	-	-	-	-		X (0)	-	-	-
PB1	10 - 18	LKVPAQNAI	75	I (52)	-	15	16	-	-	1	-	1	-	3	4	3	-	1	1	1	4	1	34	X (0)	-	-	-
		....V....		Ma (47)	35	3	-	4	3	-	1	-	1	-	-	-	-	-	-	-	-	-		I (100)	91	3	6
		......D..		U (1)	-	-	-	-	-	-	-	-	-	-	-	-	-	1	-	-	-	-		X (0)	-	-	-
PB1	11 - 19	KVPAQNAIS	75	I (52)	-	15	16	-	-	1	-	1	-	3	4	3	-	1	1	1	4	1	34	X (0)	-	-	-
		...V.....		Ma (47)	35	3	-	4	3	-	1	-	1	-	-	-	-	-	-	-	-	-		I (100)	91	3	6
		.....D...		U (1)	-	-	-	-	-	-	-	-	-	-	-	-	-	1	-	-	-	-		X (0)	-	-	-
PB1	12 - 20	VPAQNAIST	75	I (52)	-	15	16	-	-	1	-	1	-	3	4	3	-	1	1	1	4	1	34	X (0)	-	-	-
		..V......		Ma (47)	35	3	-	4	3	-	1	-	1	-	-	-	-	-	-	-	-	-		I (100)	91	3	6
		....D....		U (1)	-	-	-	-	-	-	-	-	-	-	-	-	-	1	-	-	-	-		X (0)	-	-	-
PB1	13 - 21	PAQNAISTT	75	I (52)	-	15	16	-	-	1	-	1	-	3	4	3	-	1	1	1	4	1	34	X (0)	-	-	-
		.V.......		Ma (47)	35	3	-	4	3	-	1	-	1	-	-	-	-	-	-	-	-	-		I (100)	91	3	6
		...D.....		U (1)	-	-	-	-	-	-	-	-	-	-	-	-	-	1	-	-	-	-		X (0)	-	-	-
PB1	14 - 22	AQNAISTTF	75	I (52)	-	15	16	-	-	1	-	1	-	3	4	3	-	1	1	1	4	1	34	X (0)	-	-	-
		V........		Ma (47)	35	3	-	4	3	-	1	-	1	-	-	-	-	-	-	-	-	-		I (100)	91	3	6
		..D......		U (1)	-	-	-	-	-	-	-	-	-	-	-	-	-	1	-	-	-	-		X (0)	-	-	-
PB1	15 - 23	QNAISTTFP	75	I (99)	35	17	16	4	3	1	1	1	1	3	4	3	-	1	1	1	4	1	34	I (100)	91	3	6
		.D.......		U (1)	-	-	-	-	-	-	-	-	-	-	-	-	-	1	-	-	-	-		X (0)	-	-	-
PB1	16 - 24	NAISTTFPY	75	I (99)	35	17	16	4	3	1	1	1	1	3	4	3	-	1	1	1	4	1	34	I (100)	91	3	6
		D........		U (1)	-	-	-	-	-	-	-	-	-	-	-	-	-	1	-	-	-	-		X (0)	-	-	-
PB1	17 - 25	AISTTFPYT	75	I (100)	35	17	16	4	3	1	1	1	1	3	4	3	-	3	1	1	4	1	34	I (100)	91	3	6
PB1	18 - 26	ISTTFPYTG	75	I (100)	35	17	16	4	3	1	1	1	1	3	4	3	-	3	1	1	4	1	34	I (100)	91	3	6
PB1	19 - 27	STTFPYTGD	75	I (100)	35	17	16	4	3	1	1	1	1	3	4	3	-	3	1	1	4	1	34	I (100)	91	3	6
PB1	20 - 28	TTFPYTGDP	75	I (100)	35	17	16	4	3	1	1	1	1	3	4	3	-	3	1	1	4	1	34	I (100)	91	3	6
PB1	21 - 29	TFPYTGDPP	75	I (100)	35	17	16	4	3	1	1	1	1	3	4	3	-	3	1	1	4	1	35	I (100)	91	3	6
PB1	22 - 30	FPYTGDPPY	75	I (100)	35	17	16	4	3	1	1	1	1	3	4	3	-	3	1	1	4	1	35	I (100)	91	3	6
PB1	23 - 31	PYTGDPPYS	75	I (100)	35	17	16	4	3	1	1	1	1	3	4	3	-	3	1	1	4	1	35	I (100)	91	3	6
PB1	24 - 32	YTGDPPYSH	75	I (100)	35	17	16	4	3	1	1	1	1	3	4	3	-	3	1	1	4	1	35	I (100)	91	3	6
PB1	25 - 33	TGDPPYSHG	75	I (100)	35	17	16	4	3	1	1	1	1	3	4	3	-	3	1	1	4	1	35	I (100)	91	3	6
PB1	26 - 34	GDPPYSHGT	75	I (100)	35	17	16	4	3	1	1	1	1	3	4	3	-	3	1	1	4	1	35	I (100)	91	3	6
PB1	27 - 35	DPPYSHGTG	75	I (100)	35	17	16	4	3	1	1	1	1	3	4	3	-	3	1	1	4	1	35	I (100)	91	3	6
PB1	28 - 36	PPYSHGTGT	75	I (100)	35	17	16	4	3	1	1	1	1	3	4	3	-	3	1	1	4	1	35	I (100)	91	3	6
PB1	29 - 37	PYSHGTGTG	75	I (100)	35	17	16	4	3	1	1	1	1	3	4	3	-	3	1	1	4	1	35	I (100)	91	3	6
PB1	30 - 38	YSHGTGTGY	75	I (100)	35	17	16	4	3	1	1	1	1	3	4	3	-	3	1	1	4	1	35	I (100)	91	3	6
PB1	31 - 39	SHGTGTGYT	75	I (100)	35	17	16	4	3	1	1	1	1	3	4	3	-	3	1	1	4	1	36	I (100)	92	3	6
PB1	32 - 40	HGTGTGYTM	75	I (100)	35	17	16	4	3	1	1	1	1	3	4	3	-	3	1	1	4	1	36	I (100)	92	3	6
PB1	33 - 41	GTGTGYTMD	75	I (100)	35	17	16	4	3	1	1	1	1	3	4	3	-	3	1	1	4	1	36	I (100)	92	3	6
PB1	34 - 42	TGTGYTMDT	75	I (100)	35	17	16	4	3	1	1	1	1	3	4	3	-	3	1	1	4	1	36	I (100)	92	3	6
PB1	35 - 43	GTGYTMDTV	75	I (100)	35	17	16	4	3	1	1	1	1	3	4	3	-	3	1	1	4	1	36	I (100)	92	3	6
PB1	36 - 44	TGYTMDTVN	75	I (100)	35	17	16	4	3	1	1	1	1	3	4	3	-	3	1	1	4	1	36	I (100)	92	3	6
PB1	37 - 45	GYTMDTVNR	75	I (100)	35	17	16	4	3	1	1	1	1	3	4	3	-	3	1	1	4	1	36	I (97)	89	3	6
		........K		X (0)	-	-	-	-	-	-	-	-	-	-	-	-	-	-	-	-	-	-		U (3)	3	-	-
PB1	38 - 46	YTMDTVNRT	75	I (100)	35	17	16	4	3	1	1	1	1	3	4	3	-	3	1	1	4	1	36	I (97)	89	3	6
		.......K.		X (0)	-	-	-	-	-	-	-	-	-	-	-	-	-	-	-	-	-	-		U (3)	3	-	-
PB1	39 - 47	TMDTVNRTH	75	I (100)	35	17	16	4	3	1	1	1	1	3	4	3	-	3	1	1	4	1	36	I (97)	89	3	6
		......K..		X (0)	-	-	-	-	-	-	-	-	-	-	-	-	-	-	-	-	-	-		U (3)	3	-	-
PB1	40 - 48	MDTVNRTHQ	85	I (52)	-	13	14	-	-	1	-	1	-	5	4	4	1	2	1	1	4	1	36	X (0)	-	-	-
		........K		Ma (41)	31	2	-	4	2	-	1	-	1	-	-	-	-	-	-	-	-	-		I (97)	89	3	6
		..S......		Mi (7)	-	-	-	-	-	-	-	-	-	7	-	-	-	-	-	-	-	-		X (0)	-	-	-
		.....K..K		X (0)	-	-	-	-	-	-	-	-	-	-	-	-	-	-	-	-	-	-		U (3)	3	-	-
PB1	41 - 49	DTVNRTHQY	85	I (52)	-	13	14	-	-	1	-	1	-	5	4	4	1	2	1	1	4	1	36	X (0)	-	-	-
		.......K.		Ma (41)	31	2	-	4	2	-	1	-	1	-	-	-	-	-	-	-	-	-		I (97)	89	3	6
		.S.......		Mi (7)	-	-	-	-	-	-	-	-	-	7	-	-	-	-	-	-	-	-		X (0)	-	-	-
		....K..K.		X (0)	-	-	-	-	-	-	-	-	-	-	-	-	-	-	-	-	-	-		U (3)	3	-	-
PB1	42 - 50	TVNRTHQYS	85	I (52)	-	13	14	-	-	1	-	1	-	5	4	4	1	2	1	1	4	1	36	X (0)	-	-	-
		......K..		Ma (41)	31	2	-	4	2	-	1	-	1	-	-	-	-	-	-	-	-	-		I (97)	89	3	6
		S........		Mi (7)	-	-	-	-	-	-	-	-	-	7	-	-	-	-	-	-	-	-		X (0)	-	-	-
		...K..K..		X (0)	-	-	-	-	-	-	-	-	-	-	-	-	-	-	-	-	-	-		U (3)	3	-	-
PB1	43 - 51	VNRTHQYSE	85	I (59)	-	13	14	-	-	1	-	1	-	12	4	4	1	2	1	1	4	1	36	X (0)	-	-	-
		.....K...		Ma (41)	31	2	-	4	2	-	1	-	1	-	-	-	-	-	-	-	-	-		I (97)	89	3	6
		..K..K...		X (0)	-	-	-	-	-	-	-	-	-	-	-	-	-	-	-	-	-	-		U (3)	3	-	-
PB1	44 - 52	NRTHQYSEK	85	I (59)	-	13	14	-	-	1	-	1	-	12	4	4	1	2	1	1	4	1	36	X (0)	-	-	-
		....K....		Ma (41)	31	2	-	4	2	-	1	-	1	-	-	-	-	-	-	-	-	-		I (97)	89	3	6
		.K..K....		X (0)	-	-	-	-	-	-	-	-	-	-	-	-	-	-	-	-	-	-		U (3)	3	-	-
PB1	45 - 53	RTHQYSEKG	85	I (59)	-	13	14	-	-	1	-	1	-	12	4	4	1	2	1	1	4	1	36	X (0)	-	-	-
		...K.....		Ma (41)	31	2	-	4	2	-	1	-	1	-	-	-	-	-	-	-	-	-		I (97)	89	3	6
		K..K.....		X (0)	-	-	-	-	-	-	-	-	-	-	-	-	-	-	-	-	-	-		U (3)	3	-	-
PB1	46 - 54	THQYSEKGK	85	I (59)	-	13	14	-	-	1	-	1	-	12	4	4	1	2	1	1	4	1	36	X (0)	-	-	-
		..K......		Ma (41)	31	2	-	4	2	-	1	-	1	-	-	-	-	-	-	-	-	-		I (100)	92	3	6
PB1	47 - 55	HQYSEKGKW	85	I (59)	-	13	14	-	-	1	-	1	-	12	4	4	1	2	1	1	4	1	36	X (0)	-	-	-
		.K.......		Ma (41)	31	2	-	4	2	-	1	-	1	-	-	-	-	-	-	-	-	-		I (100)	92	3	6
PB1	48 - 56	QYSEKGKWT	85	I (59)	-	13	14	-	-	1	-	1	-	12	4	4	1	2	1	1	4	1	36	X (0)	-	-	-
		K........		Ma (31)	21	2	-	2	2	-	1	-	1	-	-	-	-	-	-	-	-	-		I (89)	81	3	6
		K.......A		Mi (11)	9	-	-	1	-	-	-	-	-	-	-	-	-	-	-	-	-	-		Ma (11)	11	-	-
PB1	49 - 57	YSEKGKWTT	85	I (87)	19	15	14	2	2	1	1	1	1	12	4	4	1	2	1	1	4	1	36	I (89)	81	3	6
		.......AM		Ma (8)	7	-	-	1	-	-	-	-	-	-	-	-	-	-	-	-	-	-		Ma (8)	8	-	-
		.......A.		Mi (2)	2	-	-	-	-	-	-	-	-	-	-	-	-	-	-	-	-	-		U (3)	3	-	-
		........A		U (1)	1	-	-	-	-	-	-	-	-	-	-	-	-	-	-	-	-	-		X (0)	-	-	-
		........M		U (1)	1	-	-	-	-	-	-	-	-	-	-	-	-	-	-	-	-	-		X (0)	-	-	-
PB1	50 - 58	SEKGKWTTN	85	I (87)	19	15	14	2	2	1	1	1	1	12	4	4	1	2	1	1	4	1	36	I (89)	81	3	6
		......AM.		Ma (8)	7	-	-	1	-	-	-	-	-	-	-	-	-	-	-	-	-	-		Ma (8)	8	-	-
		......A..		Mi (2)	2	-	-	-	-	-	-	-	-	-	-	-	-	-	-	-	-	-		U (3)	3	-	-
		.......A.		U (1)	1	-	-	-	-	-	-	-	-	-	-	-	-	-	-	-	-	-		X (0)	-	-	-
		.......M.		U (1)	1	-	-	-	-	-	-	-	-	-	-	-	-	-	-	-	-	-		X (0)	-	-	-
PB1	51 - 59	EKGKWTTNT	85	I (68)	19	15	14	2	2	1	1	1	1	2	-	2	-	1	-	-	4	1	36	I (89)	81	3	6
		........S		Ma (19)	-	-	-	-	-	-	-	-	-	9	4	1	1	1	1	1	-	-		X (0)	-	-	-
		.....AM..		Mi (8)	7	-	-	1	-	-	-	-	-	-	-	-	-	-	-	-	-	-		Ma (8)	8	-	-
		.....A...		Mi (2)	2	-	-	-	-	-	-	-	-	-	-	-	-	-	-	-	-	-		U (3)	3	-	-
		......A..		U (1)	1	-	-	-	-	-	-	-	-	-	-	-	-	-	-	-	-	-		X (0)	-	-	-
		......M..		U (1)	1	-	-	-	-	-	-	-	-	-	-	-	-	-	-	-	-	-		X (0)	-	-	-
PB1	52 - 60	KGKWTTNTE	85	I (68)	19	15	14	2	2	1	1	1	1	2	-	2	-	1	-	-	4	1	36	I (89)	81	3	6
		.......S.		Ma (19)	-	-	-	-	-	-	-	-	-	9	4	1	1	1	1	1	-	-		X (0)	-	-	-
		....AM...		Mi (8)	7	-	-	1	-	-	-	-	-	-	-	-	-	-	-	-	-	-		Ma (8)	8	-	-
		....A....		Mi (2)	2	-	-	-	-	-	-	-	-	-	-	-	-	-	-	-	-	-		U (3)	3	-	-
		.....A...		U (1)	1	-	-	-	-	-	-	-	-	-	-	-	-	-	-	-	-	-		X (0)	-	-	-
		.....M...		U (1)	1	-	-	-	-	-	-	-	-	-	-	-	-	-	-	-	-	-		X (0)	-	-	-
PB1	53 - 61	GKWTTNTET	85	I (68)	19	15	14	2	2	1	1	1	1	2	-	2	-	1	-	-	4	1	36	I (89)	81	3	6
		......S..		Ma (19)	-	-	-	-	-	-	-	-	-	9	4	1	1	1	1	1	-	-		X (0)	-	-	-
		...AM....		Mi (8)	7	-	-	1	-	-	-	-	-	-	-	-	-	-	-	-	-	-		Ma (8)	8	-	-
		...A.....		Mi (2)	2	-	-	-	-	-	-	-	-	-	-	-	-	-	-	-	-	-		U (3)	3	-	-
		....A....		U (1)	1	-	-	-	-	-	-	-	-	-	-	-	-	-	-	-	-	-		X (0)	-	-	-
		....M....		U (1)	1	-	-	-	-	-	-	-	-	-	-	-	-	-	-	-	-	-		X (0)	-	-	-
PB1	54 - 62	KWTTNTETG	85	I (68)	19	15	14	2	2	1	1	1	1	2	-	2	-	1	-	-	4	1	36	I (89)	81	3	6
		.....S...		Ma (19)	-	-	-	-	-	-	-	-	-	9	4	1	1	1	1	1	-	-		X (0)	-	-	-
		..AM.....		Mi (8)	7	-	-	1	-	-	-	-	-	-	-	-	-	-	-	-	-	-		Ma (8)	8	-	-
		..A......		Mi (2)	2	-	-	-	-	-	-	-	-	-	-	-	-	-	-	-	-	-		U (3)	3	-	-
		...M.....		U (1)	1	-	-	-	-	-	-	-	-	-	-	-	-	-	-	-	-	-		X (0)	-	-	-
		...A.....		U (1)	1	-	-	-	-	-	-	-	-	-	-	-	-	-	-	-	-	-		X (0)	-	-	-
PB1	55 - 63	WTTNTETGA	85	I (68)	19	15	14	2	2	1	1	1	1	2	-	2	-	1	-	-	4	1	36	I (89)	81	3	6
		....S....		Ma (19)	-	-	-	-	-	-	-	-	-	9	4	1	1	1	1	1	-	-		X (0)	-	-	-
		.AM......		Mi (8)	7	-	-	1	-	-	-	-	-	-	-	-	-	-	-	-	-	-		Ma (8)	8	-	-
		.A.......		Mi (2)	2	-	-	-	-	-	-	-	-	-	-	-	-	-	-	-	-	-		U (3)	3	-	-
		..M......		U (1)	1	-	-	-	-	-	-	-	-	-	-	-	-	-	-	-	-	-		X (0)	-	-	-
		..A......		U (1)	1	-	-	-	-	-	-	-	-	-	-	-	-	-	-	-	-	-		X (0)	-	-	-
PB1	56 - 64	TTNTETGAP	85	I (68)	19	15	14	2	2	1	1	1	1	2	-	2	-	1	-	-	4	1	36	I (89)	81	3	6
		...S.....		Ma (19)	-	-	-	-	-	-	-	-	-	9	4	1	1	1	1	1	-	-		X (0)	-	-	-
		AM.......		Mi (8)	7	-	-	1	-	-	-	-	-	-	-	-	-	-	-	-	-	-		Ma (8)	8	-	-
		A........		Mi (2)	2	-	-	-	-	-	-	-	-	-	-	-	-	-	-	-	-	-		U (3)	3	-	-
		.A.......		U (1)	1	-	-	-	-	-	-	-	-	-	-	-	-	-	-	-	-	-		X (0)	-	-	-
		.M.......		U (1)	1	-	-	-	-	-	-	-	-	-	-	-	-	-	-	-	-	-		X (0)	-	-	-
PB1	57 - 65	TNTETGAPQ	85	I (71)	21	15	14	2	2	1	1	1	1	2	-	2	-	1	-	-	4	1	36	I (92)	83	3	6
		..S......		Ma (19)	-	-	-	-	-	-	-	-	-	9	4	1	1	1	1	1	-	-		X (0)	-	-	-
		M........		Mi (9)	8	-	-	1	-	-	-	-	-	-	-	-	-	-	-	-	-	-		Ma (8)	8	-	-
		A........		U (1)	1	-	-	-	-	-	-	-	-	-	-	-	-	-	-	-	-	-		X (0)	-	-	-
PB1	58 - 66	NTETGAPQL	85	I (81)	31	15	14	4	2	1	1	1	1	2	-	2	-	1	-	-	4	1	36	I (100)	92	3	6
		.S.......		Ma (19)	-	-	-	-	-	-	-	-	-	9	4	1	1	1	1	1	-	-		X (0)	-	-	-
PB1	59 - 67	TETGAPQLN	85	I (81)	31	15	14	4	2	1	1	1	1	2	-	2	-	1	-	-	4	1	36	I (100)	92	3	6
		S........		Ma (19)	-	-	-	-	-	-	-	-	-	9	4	1	1	1	1	1	-	-		X (0)	-	-	-
PB1	60 - 68	ETGAPQLNP	85	I (100)	31	15	14	4	2	1	1	1	1	12	4	4	1	2	1	1	4	1	36	I (100)	92	3	6
PB1	61 - 69	TGAPQLNPI	85	I (100)	31	15	14	4	2	1	1	1	1	12	4	4	1	2	1	1	4	1	36	I (100)	92	3	6
PB1	62 - 70	GAPQLNPID	85	I (100)	31	15	14	4	2	1	1	1	1	12	4	4	1	2	1	1	4	1	36	I (100)	92	3	6
PB1	63 - 71	APQLNPIDG	85	I (100)	31	15	14	4	2	1	1	1	1	12	4	4	1	2	1	1	4	1	36	I (100)	92	3	6
PB1	64 - 72	PQLNPIDGP	85	I (100)	31	15	14	4	2	1	1	1	1	12	4	4	1	2	1	1	4	1	36	I (100)	92	3	6
PB1	65 - 73	QLNPIDGPL	85	I (100)	31	15	14	4	2	1	1	1	1	12	4	4	1	2	1	1	4	1	36	I (100)	92	3	6
PB1	66 - 74	LNPIDGPLP	85	I (100)	31	15	14	4	2	1	1	1	1	12	4	4	1	2	1	1	4	1	36	I (100)	92	3	6
PB1	67 - 75	NPIDGPLPE	85	I (100)	31	15	14	4	2	1	1	1	1	12	4	4	1	2	1	1	4	1	36	I (100)	92	3	6
PB1	68 - 76	PIDGPLPED	85	I (100)	31	15	14	4	2	1	1	1	1	12	4	4	1	2	1	1	4	1	36	I (100)	92	3	6
PB1	69 - 77	IDGPLPEDN	85	I (100)	31	15	14	4	2	1	1	1	1	12	4	4	1	2	1	1	4	1	36	I (100)	92	3	6
PB1	70 - 78	DGPLPEDNE	85	I (100)	31	15	14	4	2	1	1	1	1	12	4	4	1	2	1	1	4	1	36	I (100)	92	3	6
PB1	71 - 79	GPLPEDNEP	85	I (100)	31	15	14	4	2	1	1	1	1	12	4	4	1	2	1	1	4	1	36	I (100)	92	3	6
[truncated: 12,606 more rows]
