# Supplementary material for: Avian Influenza H7N9 Virus Adaptation to Human Hosts
Source: Viruses. 2021 May 10;13(5):871. doi: 10.3390/v13050871 (PMC8150935; doi:10.3390/v13050871)
Supplement: Supplementary file 1 [file viruses-13-00871-s001.zip › SUPPLEMENTARY TABLE 3ABCD.xlsx]

## Sheet: SupTable3A
Supplementary Table 3A | Avian-to-human (A2H) substitution identified in the proteins of influenza A(H7N9) viruses from 2014 and 2017 datasets.
Proteina	Positionb	Nonamer sequence (Avian & Human) c	Amino acid substitutiond	Avian virus sequencese																																													Human virus sequencese
				Number of sequences (#) f		Motif (incidence, %)g		Net motif change for each substitution between 2014 and 2017 datasetsh	Avian species source of isolation (%)																																								Number of sequences (#) f
									Chicken		Duck (domestic)		Wild duck		Pigeon		Tree sparrow		Anas crecca		Wild pigeon		Mallard		Homing pigeon		Turkey		Blue-winged teal		Goose		Guinea fowl		Ruddy turnstone		Northern shoverl		Shoveler		Emperor goose		Wild bird		Teal		Spot-billed duck
				2014	2017	2014	2017		2014	2017	2014	2017	2014	2017	2014	2017	2014	2017	2014	2017	2014	2017	2014	2017	2014	2017	2014	2017	2014	2017	2014	2017	2014	2017	2014	2017	2014	2017	2014	2017	2014	2017	2014	2017	2014	2017	2014	2017	2014
PB2	187 - 195	KEKKEELQD	E191K	83	517	I (55)	I (83)	Unchanged	4.82	71	13.26	3	9.64	2	-	0	-	-	1.21	0	-	-	1.21	1	-	-	9.64	2	3.62	1	3.62	1	1.21	0	2.41	1	1.21	0	-	-	-	-	3.62	1	-	0	-	-	41
		....K....				Ma (36)	Ma (14)		25.31	12	2.41	1	-	-	3.62	1	2.41	0	-	-	1.21	0	-	-	1.21	0	-	-	-	-	-	-	-	-	-	-	-	-	-	-	-	-	-	-	-	-	-	-
PB2	288 - 296	QIGGIRMVD	#I292V	84	518	I (56)	Ma (11)	Reversed	-	1	13.1	2	14.29	2	-	-	-	-	1.2	0	-	-	1.2	1	-	-	10.72	2	3.58	1	1.2	0	1.2	0	2.39	1	1.2	0	-	0	1.2	0	3.58	1	-	0	1.2	0	43
		....V....				Ma (44)	I (88)		30.96	84	2.39	2	-	-	3.58	1	2.39	0	-	-	1.2	0	-	-	1.2	0	-	-	-	-	2.39	1	-	-	-	-	-	-	-	0	-	-	-	-	-	-	-	-
PB2	385 - 393	IVSGRDEQS	#R389K	84	518	I (57)	Ma (11)	Reversed	-	0	13.1	2	13.1	2	-	-	-	-	1.2	0	-	-	1.2	1	-	-	10.72	2	3.58	1	3.58	1	1.2	0	2.39	1	1.2	0	-	0	1.2	0	3.58	1	-	0	1.2	0	41
		....K....				Ma (39)	I (86)		28.58	83	2.39	2	-	-	3.58	1	2.39	0	-	-	1.2	0	-	-	1.2	0	-	-	-	-	-	0	-	-	-	-	-	-	-	-	-	-	-	-	-	-	-	-
PB2	555 - 563	RNWETVKIQ	T559N	81	515	I (63)	I (84)	Unchanged	6.18	73	13.59	3	14.82	2	-	0	-	-	1.24	0	-	-	1.24	1	-	-	7.41	1	3.71	1	3.71	1	1.24	0	2.47	1	1.24	0	-	0	1.24	0	3.71	1	-	0	1.24	0	41
		....N....				Ma (37)	Ma (14)		25.93	12	2.47	1	-	-	3.71	1	2.47	0	-	-	1.24	0	-	-	1.24	0	-	-	-	-	-	-	-	-	-	-	-	-	-	-	-	-	-	-	-	-	-	-
PB2	566 - 574	QDPTILYNK	I570M	-	513	N/A	I (61)	New	-	60	-	1	-	-	-	-	-	-	-	-	-	-	-	-	-	-	-	-	-	-	-	0	-	-	-	-	-	-	-	-	-	-	-	-	-	-	-	-	-
		....M....				N/A	Ma (33)		-	21	-	3	-	2	-	1	-	0	-	0	-	0	-	1	-	0	-	1	-	1	-	1	-	-	-	1	-	0	-	0	-	0	-	1	-	0	-	0
PB2	644 - 652	GMRILVRGN	#L648V	81	515	I (52)	Mi (9)	Reversed	-	0	13.59	2	14.82	2	-	-	-	-	1.24	0	-	-	1.24	1	-	-	2.47	0	3.71	1	3.71	1	1.24	0	2.47	1	1.24	0	-	0	1.24	0	3.71	1	-	0	1.24	0	41
		....V....				Ma (40)	I (52)		28.4	50	2.47	1	-	-	3.71	1	2.47	0	-	-	1.24	0	-	-	1.24	0	-	-	-	-	-	-	-	-	-	-	-	-	-	-	-	-	-	-	-	-	-	-
PB2	672 - 680	AGALTEDPD	#T676M	81	513	I (56)	Mi (10)	Reversed	-	0	13.59	2	14.82	2	-	-	-	-	1.24	0	-	-	1.24	1	-	-	7.41	1	3.71	1	3.71	1	1.24	0	2.47	1	1.24	0	-	0	-	-	3.71	1	-	0	1.24	0	41
		....M....				Ma (43)	I (52)		32.1	49	2.47	2	-	-	3.71	1	2.47	0	-	-	1.24	0	-	-	1.24	0	-	-	-	-	-	0	-	-	-	-	-	-	-	-	-	-	-	-	-	-	-	-
PB1	10 - 18	LKVPAQNAI	#A14V	75	508	I (52)	Ma (18)	Reversed	-	9.05512	14.67	2.3622	16	2.3622	-	-	-	-	1.34	0.19685	-	-	1.34	0.787402	-	-	2.67	0.393701	4	0.590551	2.67	0.590551	-	-	1.34	0.19685	1.34	0.19685	-	0.19685	1.34	0.19685	4	0.590551	-	0.19685	1.34	0.19685	34
		....V....				Ma (47)	I (81)		34.67	76.9685	2.67	2.16535	-	-	4	1.37795	2.67	0.19685	-	-	1.34	0.19685	-	-	1.34	0.19685	-	-	-	-	-	0.19685	-	-	-	-	-	-	-	-	-	-	-	-	-	-	-	-
PB1	44 - 52	NRTHQYSEK	#Q48K	85	519	I (59)	Ma (12)	Reversed	-	0.385356	12.95	2.31214	14.12	2.31214	-	-	-	-	1.18	0.192678	-	-	1.18	0.770713	-	-	11.77	1.92678	3.53	0.578035	3.53	0.770713	1.18	0.192678	2.36	0.578035	1.18	0.192678	-	0.192678	1.18	0.192678	3.53	0.578035	-	0.192678	1.18	0.192678	36
		....K....				Ma (41)	I (80)		30.59	75.3372	2.36	2.11946	-	-	3.53	1.34875	2.36	0.192678	-	-	1.18	0.192678	-	-	1.18	0.192678	-	-	-	-	-	0.192678	-	-	-	-	-	-	-	-	-	-	-	-	-	-	-	-
PB1	109 - 117	ETMEVVQQT	V113I	85	519	I (59)	Ma (11)	Reversed	-	0.192678	12.95	2.31214	14.12	2.31214	-	-	-	-	1.18	0.192678	-	-	1.18	0.578035	-	-	11.77	1.92678	3.53	0.578035	3.53	0.770713	1.18	0.192678	2.36	0.578035	1.18	0.192678	-	0.192678	1.18	0.192678	3.53	0.578035	-	0.192678	1.18	0.192678	36
		....I....				Ma (41)	I (89)		30.59	84.1753	2.36	2.11946	-	-	3.53	1.34875	2.36	0.192678	-	-	1.18	0.192678	-	0.192678	1.18	0.192678	-	-	-	-	-	0.192678	-	-	-	-	-	-	-	-	-	-	-	-	-	-	-	-
PB1	168 - 176	KDVMESMDK	#E172D	85	519	I (59)	Mi (12)	Reversed	-	0.385356	12.95	2.31214	14.12	2.31214	-	-	-	-	1.18	0.192678	-	-	1.18	0.770713	-	-	11.77	1.92678	3.53	0.578035	3.53	0.770713	1.18	0.192678	2.36	0.578035	1.18	0.192678	-	0.192678	1.18	0.192678	3.53	0.578035	-	0.192678	1.18	0.192678	36
		....D....				Ma (39)	I (51)		28.24	47.3988	2.36	1.7341	-	-	3.53	1.34875	2.36	0.192678	-	-	1.18	0.192678	-	-	1.18	0.192678	-	-	-	-	-	0.192678	-	-	-	-	-	-	-	-	-	-	-	-	-	-	-	-
PB1	253 - 261	YFVETLARS	#T257A	85	518	I (59)	Ma (12)	Reversed	-	0.963391	12.95	2.31214	14.12	2.31214	-	-	-	-	1.18	0.192678	-	-	1.18	0.770713	-	-	11.77	1.92678	3.53	0.578035	3.53	0.770713	1.18	0.192678	2.36	0.578035	1.18	0.192678	-	0.192678	1.18	0.192678	3.53	0.578035	-	0.192678	1.18	0.192678	36
		....A....				Ma (41)	I (87)		30.59	82.8516	2.36	1.92678	-	-	3.53	1.34875	2.36	0.192678	-	-	1.18	0.192678	-	-	1.18	0.192678	-	-	-	-	-	0.192678	-	-	-	-	-	-	-	-	-	-	-	-	-	-	-	-
PB1	364 - 372	LRTQIPAEM	#I368V	85	518	I (55)	Ma (12)	Reversed	-	1.54143	12.95	2.31214	12.95	2.11946	-	-	-	-	1.18	0.192678	-	-	1.18	0.578035	-	-	11.77	1.92678	3.53	0.578035	1.18	0.192678	1.18	0.192678	2.36	0.578035	1.18	0.192678	-	0.192678	1.18	0.192678	3.53	0.578035	-	0.192678	1.18	0.192678	36
		....V....				Ma (41)	I (77)		30.59	72.8324	2.36	1.92678	-	-	3.53	1.34875	2.36	0.192678	-	-	1.18	0.192678	-	0.192678	1.18	0.192678	-	-	-	-	-	0.192678	-	-	-	-	-	-	-	-	-	-	-	-	-	-	-	-
PB1	381 - 389	FNESTRKKI	#E383K, #K387E	85	519	I (58)	Ma (11)	Reversed, Reversed	-	0.192678	12.95	2.31214	12.95	2.11946	-	-	-	-	1.18	0.192678	-	-	1.18	0.770713	-	-	11.77	1.92678	3.53	0.578035	3.53	0.770713	1.18	0.192678	2.36	0.578035	1.18	0.192678	-	0.192678	1.18	0.192678	3.53	0.578035	-	0.192678	1.18	0.192678	36
		..K...E..				Ma (41)	I (88)		30.59	84.3931	2.36	1.92678	-	-	3.53	1.34875	2.36	0.192678	-	-	1.18	0.192678	-	-	1.18	0.192678	-	-	-	-	-	0.192678	-	-	-	-	-	-	-	-	-	-	-	-	-	-	-	-
PB1	423 - 431	ILNLGQKRY	#R430K	85	519	I (49)	Ma (9)	Reversed	-	0.192678	12.95	2.11946	14.12	2.31214	-	-	-	-	1.18	0.192678	-	-	1.18	0.770713	-	-	8.24	1.34875	3.53	0.578035	-	-	-	-	2.36	0.578035	1.18	0.192678	-	0.192678	-	-	3.53	0.578035	-	0.192678	1.18	0.192678	36
		.......K.				Ma (49)	I (90)		30.59	84.3931	2.36	2.31214	-	-	3.53	1.34875	2.36	0.192678	-	-	1.18	0.192678	-	-	1.18	0.192678	2.36	0.385356	-	-	3.53	0.963391	1.18	0	-	-	-	-	-	-	1.18	0.192678	-	-	-	-	-	-
PB1	521 - 529	ADMSIGVTV	I525V	85	519	I (73)	I (67)	Unchanged	11.77	53.9499	14.12	3.27553	14.12	2.31214	1.18	0.578035	-	-	1.18	0.192678	-	-	1.18	0.770713	-	-	11.77	1.92678	3.53	0.578035	3.53	0.770713	1.18	0.192678	2.36	0.578035	1.18	0.192678	-	0.192678	1.18	0.192678	3.53	0.578035	-	0.192678	1.18	0.192678	36
		....V....				Ma (27)	Ma (33)		18.83	30.4432	1.18	1.15607	-	-	2.36	0.770713	2.36	0.192678	-	-	1.18	0.192678	-	-	1.18	0.192678	-	-	-	-	-	0.192678	-	-	-	-	-	-	-	-	-	-	-	-	-	-	-	-
PB1	569 - 577	QTRRSFELK	#S573A	85	519	I (60)	Ma (11)	Reversed	1.18	0.192678	12.95	2.31214	14.12	2.31214	-	-	-	-	1.18	0.192678	-	-	1.18	0.770713	-	-	11.77	1.92678	3.53	0.578035	3.53	0.770713	1.18	0.192678	2.36	0.578035	1.18	0.192678	-	0.192678	1.18	0.192678	3.53	0.578035	-	0.192678	1.18	0.192678	36
		....A....				Ma (39)	I (88)		29.42	84.2004	2.36	2.11946	-	-	3.53	1.34875	1.18	0.192678	-	-	1.18	0.192678	-	-	1.18	0.192678	-	-	-	-	-	0.192678	-	-	-	-	-	-	-	-	-	-	-	-	-	-	-	-
PB1	624 - 632	LCNPLNPFV	#L628M	85	519	I (59)	Ma (11)	Reversed	-	0.192678	12.95	2.31214	14.12	2.31214	-	-	-	-	1.18	0.192678	-	-	1.18	0.770713	-	-	11.77	1.92678	3.53	0.578035	3.53	0.770713	1.18	0.192678	2.36	0.578035	1.18	0.192678	-	0.192678	1.18	0.192678	3.53	0.578035	-	0.192678	1.18	0.192678	36
		....M....				Ma (41)	I (88)		30.59	83.815	2.36	2.11946	-	-	3.53	1.34875	2.36	0.192678	-	-	1.18	0.192678	-	-	1.18	0.192678	-	-	-	-	-	0.192678	-	-	-	-	-	-	-	-	-	-	-	-	-	-	-	-
PB1	634 - 642	HKEIESVNN	#E638D	85	519	I (59)	Ma (11)	Reversed	-	0.192678	12.95	2.31214	14.12	2.31214	-	-	-	-	1.18	0.192678	-	-	1.18	0.770713	-	-	11.77	1.92678	3.53	0.578035	3.53	0.770713	1.18	0.192678	2.36	0.578035	1.18	0.192678	-	0.192678	1.18	0.192678	3.53	0.578035	-	0.192678	1.18	0.192678	36
		....D....				Ma (41)	I (80)		30.59	75.5299	2.36	2.11946	-	-	3.53	1.34875	2.36	0.192678	-	-	1.18	0.192678	-	-	1.18	0.192678	-	-	-	-	-	0.192678	-	-	-	-	-	-	-	-	-	-	-	-	-	-	-	-
PA	33 - 41	NKFAAICTH	#A37S	81	518	I (57)	Ma (11)	Reversed	-	0.19305	13.59	2.3166	14.82	2.3166	-	-	-	-	1.24	0.19305	-	-	1.24	0.772201	-	-	7.41	1.1583	3.71	0.579151	3.71	0.772201	1.24	0.19305	2.47	0.579151	1.24	0.19305	-	0.19305	1.24	0.19305	3.71	0.579151	-	0.19305	1.24	0.19305	36
		....S....				Ma (42)	I (88)		30.87	84.1699	2.47	2.12355	-	-	3.71	1.35135	2.47	0.19305	-	-	1.24	0.19305	-	-	1.24	0.19305	-	-	-	-	-	0.19305	-	-	-	-	-	-	-	-	-	-	-	-	-	-	-	-
PA	58 - 66	GESIIVESG	#I61T, #V63I	81	517	I (56)	Ma (10)	Reversed, Reversed	-	0.193424	13.59	2.12766	14.82	2.32108	-	-	-	-	1.24	0.193424	-	-	1.24	0.773694	-	-	7.41	1.16054	3.71	0.580271	3.71	0.773694	1.24	0.193424	1.24	0.386847	1.24	0.193424	-	0.193424	1.24	0.193424	3.71	0.580271	-	0.193424	1.24	0.193424	36
		...T.I...				Ma (43)	I (85)		32.1	80.4642	2.47	2.12766	-	-	3.71	1.35397	2.47	0.193424	-	-	1.24	0.193424	-	-	1.24	0.193424	-	-	-	-	-	0.193424	-	-	-	-	-	-	-	-	-	-	-	-	-	-	-	-
PA	92 - 100	NSICNTTGV	V100A	81	515	I (66)	I (43)	Unchanged	7.41	31.4563	14.82	3.30097	14.82	2.3301	-	0.38835	-	-	1.24	0.194175	-	-	1.24	0.776699	-	-	7.41	1.16505	3.71	0.582524	3.71	0.970874	1.24	0.194175	2.47	0.582524	1.24	0.194175	-	0.194175	1.24	0.194175	3.71	0.582524	-	0.194175	1.24	0.194175	36
		........A				Ma (35)	Ma (38)		24.7	34.9515	1.24	1.16505	-	-	3.71	0.970874	2.47	0.194175	-	-	1.24	0.194175	-	-	1.24	0.194175	-	-	-	-	-	-	-	-	-	-	-	-	-	-	-	-	-	-	-	-	-	-
PA	257 - 265	IEPFLKTTP	#K262R	81	516	I (59)	Ma (29)	Reversed	3.71	18.4109	13.59	2.51938	14.82	2.32558	-	0.193798	-	-	1.24	0.193798	-	-	1.24	0.775194	-	-	7.41	1.16279	3.71	0.581395	3.71	0.968992	1.24	0.193798	2.47	0.581395	1.24	0.193798	-	0.193798	1.24	0.193798	2.47	0.387597	-	0.193798	1.24	0.193798	36
		.....R...				Ma (41)	I (66)		28.4	62.2093	2.47	1.74419	-	-	3.71	1.16279	2.47	0.193798	-	-	1.24	0.193798	-	-	1.24	0.193798	-	-	-	-	-	-	-	-	-	-	-	-	-	-	-	-	1.24	0.193798	-	-	-	-
PA	333 - 341	NYLLAWKQV	#A337T	82	513	I (57)	Mi (11)	Reversed	-	0.581395	13.42	2.13178	14.64	2.32558	-	-	-	-	1.22	0.193798	-	-	1.22	0.775194	-	-	8.54	1.35659	3.66	0.581395	3.66	0.775194	1.22	0.193798	2.44	0.581395	1.22	0.193798	-	0.193798	1.22	0.193798	3.66	0.581395	-	0.193798	1.22	0.193798	36
		....T....				Ma (41)	I (69)		30.49	65.1163	2.44	2.13178	-	-	3.66	1.35659	2.44	0.193798	-	-	1.22	0.193798	-	-	1.22	0.193798	-	-	-	-	-	0.193798	-	-	-	-	-	-	-	-	-	-	-	-	-	-	-	-
PA	352 - 360	EKIPKTKNM	#K356R	82	513	I (56)	Ma (29)	Reversed	1.22	19.2982	13.42	2.14425	14.64	2.33918	-	-	-	-	1.22	0.194932	-	-	1.22	0.779727	-	-	8.54	1.36452	3.66	0.584795	2.44	0.584795	-	-	2.44	0.584795	1.22	0.194932	-	0.194932	1.22	0.194932	3.66	0.584795	-	-	1.22	0.194932	36
		....R....				Ma (39)	I (69)		28.05	64.7173	2.44	2.33918	-	-	3.66	1.36452	2.44	0.194932	-	-	1.22	0.194932	-	-	1.22	0.194932	-	-	-	-	-	0.194932	-	-	-	-	-	-	-	-	-	-	-	-	-	-	-	-
PA	387 - 395	VSDLRQYDS	#S388N, D394N	82	516	I (41)	Mi (8)	Reversed, Unchanged	-	0.193798	13.42	2.13178	14.64	2.32558	-	-	-	-	-	-	-	-	-	0.193798	-	-	-	-	3.66	0.581395	2.44	0.581395	-	-	1.22	0.387597	1.22	0.193798	-	0.193798	-	-	3.66	0.581395	-	0.193798	1.22	0.193798	36
		.N..K..N.				Ma (34)	Ma (37)		24.4	34.6899	1.22	0.968992	-	-	3.66	0.968992	2.44	0.193798	-	-	1.22	0.193798	-	-	1.22	0.193798	-	-	-	-	-	-	-	-	-	-	-	-	-	-	-	-	-	-	-	-	-	-
PA	407 - 415	IQSEFNKAC	#S409N	83	513	I (63)	Ma (20)	Reversed	3.62	9.35673	14.46	2.33918	14.46	2.33918	-	0.194932	-	-	1.21	0.194932	-	-	1.21	0.779727	-	-	9.64	1.55945	3.62	0.584795	3.62	0.779727	1.21	0.194932	2.41	0.584795	1.21	0.194932	-	0.194932	1.21	0.194932	3.62	0.584795	-	0.194932	1.21	0.194932	36
		..N......				Ma (37)	I (79)		27.72	74.8538	1.21	2.14425	-	-	3.62	1.16959	2.41	0.194932	-	-	1.21	0.194932	-	-	1.21	0.194932	-	-	-	-	-	0.194932	-	-	-	-	-	-	-	-	-	-	-	-	-	-	-	-
PA	419 - 427	DSSWIELDE	#I423V	84	516	I (58)	Ma (11)	Reversed	-	0.581395	13.1	2.13178	14.29	2.32558	-	-	-	-	1.2	0.193798	-	-	1.2	0.775194	-	-	10.72	1.74419	3.58	0.581395	3.58	0.775194	1.2	0.193798	2.39	0.581395	1.2	0.193798	-	0.193798	1.2	0.193798	3.58	0.581395	-	0.193798	1.2	0.193798	36
		....V....				Ma (41)	I (86)		29.77	81.3953	2.39	2.13178	-	-	3.58	1.35659	2.39	0.193798	-	-	1.2	0.193798	-	-	1.2	0.193798	-	-	-	-	-	0.193798	-	-	-	-	-	-	-	-	-	-	-	-	-	-	-	-
PA	550 - 558	LRTAIGQVS	#I554V	84	515	I (58)	Ma (11)	Reversed	-	0.582524	13.1	2.13592	14.29	2.3301	-	-	-	-	1.2	0.194175	-	-	1.2	0.776699	-	-	10.72	1.74757	3.58	0.582524	3.58	0.776699	1.2	0.194175	2.39	0.582524	1.2	0.194175	-	0.194175	1.2	0.194175	3.58	0.582524	-	0.194175	1.2	0.194175	36
		....V....				Ma (42)	I (89)		30.96	84.466	2.39	2.13592	-	-	3.58	1.35922	2.39	0.194175	-	-	1.2	0.194175	-	-	1.2	0.194175	-	-	-	-	-	0.194175	-	-	-	-	-	-	-	-	-	-	-	-	-	-	-	-
PA	603 - 611	KEKDMTKEF	#M607L	84	515	I (57)	Ma (11)	Reversed	-	0.194175	13.1	2.3301	14.29	2.3301	-	-	-	-	1.2	0.194175	-	-	1.2	0.776699	-	-	10.72	1.74757	3.58	0.582524	3.58	0.776699	1.2	0.194175	2.39	0.582524	-	-	-	0.194175	1.2	0.194175	3.58	0.582524	-	0.194175	1.2	0.194175	36
		....L....				Ma (42)	I (85)		30.96	81.3592	2.39	2.13592	-	-	3.58	1.16505	2.39	0.194175	-	-	1.2	0.194175	-	-	1.2	0.194175	-	-	-	-	-	0.194175	-	-	-	-	-	-	-	-	-	-	-	-	-	-	-	-
PA	680 - 688	TFDLGGLYE	#G684E	83	511	I (58)	Ma (12)	Reversed	-	0.782779	13.26	2.34834	13.26	2.15264	-	-	-	-	1.21	0.195695	-	-	1.21	0.782779	-	-	10.85	1.76125	3.62	0.587084	3.62	0.782779	1.21	0.195695	2.41	0.587084	1.21	0.195695	-	0.195695	1.21	0.195695	3.62	0.587084	-	0.195695	1.21	0.195695	36
		....E....				Ma (42)	I (89)		31.33	84.5401	2.41	2.15264	-	-	3.62	1.36986	2.41	0.195695	-	-	1.21	0.195695	-	-	1.21	0.195695	-	-	-	-	-	0.195695	-	-	-	-	-	-	-	-	-	-	-	-	-	-	-	-
PA	708 - 716	NSFLTHALK	K716R	79	509	I (57)	Ma (11)	Reversed	-	0.588235	13.93	2.35294	10.13	1.56863	-	-	-	-	1.27	0.196078	-	-	1.27	0.784314	-	-	11.4	1.76471	3.8	0.588235	3.8	0.784314	1.27	0.196078	2.54	0.588235	1.27	0.196078	-	0.196078	1.27	0.196078	3.8	0.588235	-	0.196078	1.27	0.196078	36
		........R				Ma (43)	I (78)		32.92	74.7059	2.54	1.96078	-	-	3.8	0.980392	1.27	0.196078	-	-	1.27	0.196078	-	-	1.27	0.196078	-	-	-	-	-	0.196078	-	-	-	-	-	-	-	-	-	-	-	-	-	-	-	-
PA_X	33 - 41	NKFAAICTH	A37S	80	485	I (58)	Ma (11)	Reversed	-	0	13.75	2.47423	15	2.47423	-	-	-	-	1.25	0.206186	-	-	1.25	0.824742	-	-	7.5	1.23711	3.75	0.618557	3.75	0.618557	1.25	0.206186	2.5	0.618557	1.25	0.206186	-	-	1.25	0.206186	3.75	0.618557	-	-	1.25	0.206186	36
		....S....				Ma (41)	I (89)		30	84.9485	2.5	1.85567	-	-	3.75	1.4433	2.5	0.206186	-	-	1.25	0.206186	-	-	1.25	0.206186	-	-	-	-	-	0.206186	-	-	-	-	-	-	-	-	-	-	-	-	-	-	-	-
PA_X	58 - 66	GESIIVESG	I61T, V63I	79	484	I (56)	Ma (10)	Reversed, Reversed	-	0	13.93	2.26804	15.19	2.47423	-	-	-	-	1.27	0.206186	-	-	1.27	0.824742	-	-	6.33	1.03093	3.8	0.618557	3.8	0.618557	1.27	0.206186	1.27	0.412371	1.27	0.206186	-	-	1.27	0.206186	3.8	0.618557	-	-	1.27	0.206186	36
		...T.I...				Ma (43)	I (85)		31.65	80.8247	2.54	1.85567	-	-	3.8	1.4433	2.54	0.206186	-	-	1.27	0.206186	-	-	1.27	0.206186	-	-	-	-	-	0.206186	-	-	-	-	-	-	-	-	-	-	-	-	-	-	-	-
PA_X	92 - 100	NSICNTTGV	V100A	80	482	I (66)	I (42)	Unchanged	7.5	30.4979	15	3.11203	15	2.48963	-	0.414938	-	-	1.25	0.207469	-	-	1.25	0.829876	-	-	7.5	1.24481	3.75	-	3.75	0.829876	1.25	0.207469	2.5	0.622407	1.25	0.207469	-	-	1.25	0.207469	3.75	0.622407	-	-	1.25	0.207469	36
		........A				Ma (34)	Ma (39)		23.75	35.6846	1.25	1.24481	-	-	3.75	1.03734	2.5	0.207469	-	-	1.25	0.207469	-	-	1.25	0.207469	-	-	-	-	-	-	-	-	-	-	-	-	-	-	-	-	-	-	-	-	-	-
PA_X	192 - 200	VSPREAKRQ	P194L, R195K, R199K	80	481	I (45)	Mi (8)	Unchanged, Reversed, Reversed	-	0	13.75	2.2869	15	2.4948	-	-	-	-	1.25	0.2079	-	-	1.25	0.831601	-	-	-	-	3.75	0.623701	2.5	0.4158	-	-	1.25	0.4158	1.25	0.2079	-	-	-	-	3.75	0.623701	-	-	1.25	0.2079	36
		..LK...K.				Ma (36)	Ma (33)		25	30.3534	2.5	0.831601	-	-	3.75	1.2474	2.5	0.2079	-	-	1.25	0.2079	-	-	1.25	0.2079	-	-	-	-	-	-	-	-	-	-	-	-	-	-	-	-	-	-	-	-	-	-
PA_X	243 - 251	RASFLKCQK	K248R	77	477	I (58)	I (60)	Unchanged	7.8	49.6855	15.59	3.14465	15.59	2.51572	-	0.419287	-	-	1.3	0.209644	-	-	1.3	0.628931	-	-	3.9	0.628931	-	-	3.9	0.838574	1.3	0.209644	1.3	0.209644	-	-	-	-	1.3	0.209644	3.9	0.628931	-	-	1.3	0.209644	35
		.....R...				Ma (35)	Ma (39)		24.68	36.0587	1.3	1.04822	-	-	3.9	1.04822	2.6	0.209644	-	-	1.3	0.209644	-	-	1.3	0.209644	-	-	-	-	-	-	-	-	-	-	-	-	-	-	-	-	-	-	-	-	-	-
HA	61 - 69	SKGKKTVDL	K65R	-	626	N/A	I (45)	New	-	44.7284	-	0.159744	-	-	-	-	-	-	-	-	-	0.159744	-	-	-	-	-	-	-	-	-	-	-	-	-	-	-	-	-	-	-	-	-	0.159744	-	-	-	-	-
		....R....				N/A	Ma (42)		-	34.984	-	2.71565	-	1.91693	-	1.11821	-	0.159744	-	0.159744	-	-	-	-	-	0.159744	-	-	-	-	-	0.638978	-	-	-	-	-	-	-	0.159744	-	-	-	-	-	-	-	0.159744
HA	231 - 239	QVNGQSGRI	Q235L	99	628	I (65)	Ma (14)	Reversed	5.06	2.70701	16.17	2.70701	12.13	1.91083	-	0.477707	-	-	1.02	0.159236	1.02	0.159236	2.03	0.796178	1.02	0.159236	10.11	1.59236	3.04	0.477707	4.05	0.796178	2.03	0.318471	2.03	0.477707	1.02	0.159236	-	0.159236	1.02	0.159236	2.03	0.318471	-	-	1.02	0.159236	45
		....L....				Ma (35)	I (83)		28.29	79.9363	2.03	1.91083	-	-	3.04	0.636943	2.03	0.159236	-	-	-	-	-	-	-	-	-	-	-	-	-	0.318471	-	-	-	-	-	-	-	-	-	-	-	-	-	-	-	-
HA	423 - 431	TRDSMTEVW	#M427I	100	632	I (51)	Ma (9)	Reversed	-	0	16	2.68987	12	1.89873	-	-	-	-	-	-	-	-	3	0.632911	-	-	7	1.10759	3	0.474684	2	0.474684	-	-	2	0.474684	1	0.158228	-	0.158228	1	0.158228	3	0.474684	-	-	1	0.158228	53
		....I....				Ma (43)	I (84)		33	79.9051	2	2.05696	-	-	3	1.10759	2	0.158228	1	0.158228	1	0.158228	-	-	1	0.158228	-	-	-	-	-	0.316456	-	-	-	-	-	-	-	-	-	-	-	-	-	-	-	-
HA	454 - 462	MNKLYERVR	#N455D, R462K	100	632	I (48)	Ma (8)	Reversed, Reversed	-	0	12	1.89873	10	1.58228	-	-	-	-	-	-	-	-	2	0.791139	-	-	9	1.42405	3	0.474684	2	0.316456	2	0.316456	2	0.474684	1	0.158228	-	-	1	0.158228	3	0.474684	-	-	1	0.158228	53
		.D......K				Ma (41)	I (87)		32	82.9114	2	2.05696	-	-	3	1.10759	2	0.158228	-	-	1	0.158228	-	-	1	0.158228	-	-	-	-	-	0.316456	-	-	-	-	-	-	-	-	-	-	-	-	-	-	-	-
NP	30 - 38	GRMVGGIGR	G34S	86	520	I (51)	Ma (13)	Reversed	-	3.46154	12.8	2.11538	11.63	1.92308	-	-	-	-	1.17	0.192308	-	-	2.33	0.961538	-	-	4.66	0.769231	3.49	0.576923	3.49	0.769231	1.17	0.192308	3.49	0.769231	1.17	0.192308	-	0.192308	1.17	0.192308	3.49	0.576923	-	-	1.17	0.192308	36
		....S....				Ma (41)	I (85)		30.24	80.7692	2.33	2.11538	-	-	3.49	1.15385	2.33	0.192308	-	-	1.17	0.192308	-	-	1.17	0.192308	-	-	-	-	-	0.192308	-	-	-	-	-	-	-	-	-	-	-	-	-	-	-	-
NP	48 - 56	KLSDYEGRL	#Y52N	86	520	I (49)	Ma (9)	Reversed	-	0.192308	12.8	2.11538	12.8	2.11538	-	-	-	-	1.17	0.192308	-	-	2.33	0.769231	-	-	4.66	0.769231	2.33	0.384615	3.49	0.769231	1.17	0.192308	3.49	0.769231	-	-	-	0.192308	-	-	3.49	0.576923	-	0.192308	1.17	0.192308	37
		....N....				Ma (41)	I (88)		30.24	84.0385	2.33	2.11538	-	-	3.49	0.961538	2.33	0.192308	-	-	1.17	0.192308	-	-	1.17	0.192308	-	-	-	-	-	0.192308	-	-	-	-	-	-	-	-	-	-	-	-	-	-	-	-
NP	73 - 81	ERRNKYLEE	K77R	86	520	I (59)	Ma (12)	Reversed	-	0.769231	12.8	2.11538	12.8	2.11538	-	-	-	-	1.17	0.192308	-	-	2.33	0.961538	-	-	11.63	1.92308	3.49	0.576923	3.49	0.769231	1.17	0.192308	3.49	0.769231	1.17	0.192308	-	0.192308	1.17	0.192308	3.49	0.576923	-	0.192308	1.17	0.192308	37
		....R....				Ma (41)	I (88)		30.24	83.8462	2.33	2.30769	-	-	3.49	1.15385	2.33	0.192308	-	-	1.17	0.192308	-	-	1.17	0.192308	-	-	-	-	-	0.192308	-	-	-	-	-	-	-	-	-	-	-	-	-	-	-	-
NP	182 - 190	AVKGVGTMV	#V186I	86	520	I (58)	Ma (12)	Reversed	-	0.576923	12.8	2.11538	12.8	2.11538	-	-	-	-	1.17	0.192308	-	-	2.33	0.961538	-	-	11.63	1.92308	2.33	0.384615	3.49	0.769231	1.17	0.192308	3.49	0.769231	1.17	0.192308	-	0.192308	1.17	0.192308	3.49	0.576923	-	0.192308	1.17	0.192308	37
		....I....				Ma (41)	I (85)		30.24	81.1538	2.33	2.30769	-	-	3.49	1.15385	2.33	0.192308	-	-	1.17	0.192308	-	-	1.17	0.192308	-	-	-	-	-	0.192308	-	-	-	-	-	-	-	-	-	-	-	-	-	-	-	-
NP	348 - 356	RGTRVVPRG	#V352M	86	520	I (42)	Ma (8)	Reversed	-	0.192308	12.8	2.11538	3.49	0.576923	-	-	-	-	1.17	0.192308	-	-	2.33	0.961538	-	-	9.31	1.53846	3.49	0.576923	3.49	0.769231	1.17	0.192308	3.49	0.769231	1.17	0.192308	-	-	-	-	-	-	-	0.192308	-	-	37
		....M....				Ma (40)	I (87)		29.07	83.6538	2.33	2.11538	-	-	3.49	0.769231	2.33	0.192308	-	-	1.17	0.192308	-	-	1.17	0.192308	-	-	-	-	-	-	-	-	-	-	-	-	-	-	-	-	-	-	-	-	-	-
NP	371 - 379	METMDSSTL	T373A, S377N	86	520	I (50)	Mi (10)	Reversed, Reversed	-	0.192308	12.8	2.11538	12.8	2.11538	-	-	-	-	1.17	0.192308	-	-	2.33	0.961538	-	-	4.66	0.769231	1.17	0.192308	3.49	0.769231	1.17	0.192308	3.49	0.769231	1.17	0.192308	-	0.192308	1.17	0.192308	3.49	0.576923	-	0.192308	1.17	0.192308	37
		..A...N..				Ma (29)	I (45)		19.77	42.1154	2.33	1.73077	-	-	2.33	0.576923	2.33	0.192308	-	-	1.17	0.192308	-	-	1.17	0.192308	-	-	-	-	-	-	-	-	-	-	-	-	-	-	-	-	-	-	-	-	-	-
NP	402 - 410	SAGQISVQP	#I406V	86	520	I (61)	Ma (12)	Reversed	1.17	1.15385	12.8	2.11538	12.8	2.11538	-	-	-	-	1.17	0.192308	-	-	2.33	0.961538	-	-	11.63	1.92308	3.49	0.576923	3.49	0.769231	1.17	0.192308	3.49	0.769231	1.17	0.192308	-	0.192308	1.17	0.192308	3.49	0.576923	-	0.192308	1.17	0.192308	37
		....V....				Ma (40)	I (76)		29.07	71.5385	2.33	2.11538	-	-	3.49	1.15385	2.33	0.192308	-	-	1.17	0.192308	-	-	1.17	0.192308	-	-	-	-	-	0.192308	-	-	-	-	-	-	-	-	-	-	-	-	-	-	-	-
NP	478 - 486	SFDMSNEGS	S482N	85	518	I (58)	Ma (13)	Reversed	-	2.12355	12.95	2.12355	11.77	1.9305	-	-	-	-	1.18	0.19305	-	-	2.36	0.965251	-	-	11.77	1.9305	3.53	0.579151	3.53	0.772201	1.18	0.19305	3.53	0.772201	1.18	0.19305	-	0.19305	1.18	0.19305	3.53	0.579151	-	0.19305	-	-	37
		....N....				Ma (41)	I (86)		30.59	82.0463	2.36	2.3166	-	-	3.53	1.1583	2.36	0.19305	-	-	1.18	0.19305	-	-	1.18	0.19305	-	-	-	-	-	0.19305	-	-	-	-	-	-	-	-	-	-	-	-	-	-	-	-
NA	392 - 400	IVLNTDWSG	#T401A	92	620	I (54)	Ma (10)	Reversed	-	0.644122	13.05	2.0934	11.96	1.77134	-	-	-	-	1.09	0.161031	-	-	1.09	0.644122	-	-	10.87	1.61031	3.27	0.483092	3.27	0.644122	2.18	0.322061	2.18	0.483092	1.09	0.161031	-	0.161031	1.09	0.161031	2.18	0.322061	-	0.161031	1.09	0.161031	47
		....A....				Ma (44)	I (89)		34.79	85.0242	1.09	1.93237	-	-	3.27	1.12721	2.18	0.161031	-	-	1.09	0.161031	-	-	1.09	0.161031	-	-	-	-	-	0.322061	-	-	-	-	-	-	-	-	-	-	-	-	-	-	-	-
M1	11 - 19	VLSIVPSGP	V15I	85	519	I (59)	Ma (11)	Reversed	-	0.191939	12.95	2.11132	12.95	2.11132	-	-	-	-	1.18	0.191939	-	-	1.18	0.767754	-	-	11.77	1.91939	3.53	0.575816	3.53	0.767754	1.18	0.191939	3.53	0.959693	1.18	0.191939	-	0.191939	1.18	0.191939	3.53	0.575816	-	0.191939	1.18	0.191939	38
		....I....				Ma (41)	I (88)		30.59	83.3013	2.36	2.30326	-	-	3.53	1.34357	2.36	0.191939	-	-	1.18	0.191939	-	-	1.18	0.191939	-	-	-	-	-	0.191939	-	-	-	-	-	-	-	-	-	-	-	-	-	-	-	-
M1	33 - 41	AGKNTDLEA	#T37A	86	522	I (57)	Ma (11)	Reversed	-	0.573614	12.8	2.29446	12.8	2.10325	-	-	-	-	1.17	0.191205	-	-	-	0.382409	-	-	11.63	1.91205	3.49	0.573614	3.49	0.764818	1.17	0.191205	3.49	0.956023	1.17	0.191205	-	0.191205	1.17	0.191205	3.49	0.573614	-	0.191205	1.17	0.191205	38
		....A....				Ma (41)	I (86)		30.24	82.0268	2.33	2.10325	-	-	3.49	1.33843	2.33	0.191205	-	-	1.17	0.191205	-	-	1.17	0.191205	-	-	-	-	-	0	-	-	-	-	-	-	-	-	-	-	-	-	-	-	-	-
M1	42 - 50	LMEWLKTRP	#L46I	86	523	I (58)	Ma (11)	Reversed	-	0.191205	12.8	2.10325	12.8	2.10325	-	-	-	-	1.17	0.191205	-	-	1.17	0.764818	-	-	11.63	1.91205	3.49	0.573614	3.49	0.764818	1.17	0.191205	3.49	0.956023	1.17	0.191205	-	0.191205	1.17	0.191205	3.49	0.573614	-	0.191205	1.17	0.191205	38
		....I....				Ma (41)	I (89)		30.24	84.13	2.33	2.29446	-	-	3.49	1.33843	2.33	0.191205	-	-	1.17	0.191205	-	-	1.17	0.191205	-	-	-	-	-	0.191205	-	-	-	-	-	-	-	-	-	-	-	-	-	-	-	-
M1	94 - 102	DRAVKLYRK	#R95K, R101K	86	522	I (59)	Ma (11)	Reversed, Reversed	-	0.191571	12.8	2.10728	13.96	2.29885	-	-	-	-	1.17	0.191571	-	-	1.17	0.766284	-	-	11.63	1.91571	3.49	0.574713	3.49	0.766284	1.17	0.191571	3.49	0.957854	1.17	0.191571	-	0.191571	1.17	0.191571	3.49	0.574713	-	0.191571	1.17	0.191571	38
		.K.....K.				Ma (31)	I (82)		22.1	78.3525	2.33	2.10728	-	-	2.33	1.14943	2.33	0.191571	-	-	1.17	0.191571	-	-	1.17	0.191571	-	-	-	-	-	0.191571	-	-	-	-	-	-	-	-	-	-	-	-	-	-	-	-
M1	103 - 111	LKREITFHG	I107M	86	522	I (59)	Ma (12)	Reversed	-	0.191571	12.8	2.29885	13.96	2.29885	-	-	-	-	1.17	0.191571	-	-	1.17	0.766284	-	-	11.63	1.91571	3.49	0.574713	3.49	0.766284	1.17	0.191571	3.49	0.957854	1.17	0.191571	-	0.191571	1.17	0.191571	3.49	0.574713	-	0.191571	1.17	0.191571	38
		....M....				Ma (41)	I (88)		30.24	84.0996	2.33	2.10728	-	-	3.49	1.341	2.33	0.191571	-	-	1.17	0.191571	-	-	1.17	0.191571	-	-	-	-	-	0.191571	-	-	-	-	-	-	-	-	-	-	-	-	-	-	-	-
M1	138 - 146	VTTEVAFGL	#T140A, #V142G, F144L	86	522	I (59)	Ma (11)	Reversed, Reversed, Reversed	-	0.191571	12.8	2.29885	13.96	2.29885	-	-	-	-	1.17	0	-	-	1.17	0.766284	-	-	11.63	1.91571	3.49	0.574713	3.49	0.766284	1.17	0.191571	3.49	0.957854	1.17	0.191571	-	0.191571	1.17	0.191571	3.49	0.574713	-	0.191571	1.17	0.191571	38
		..A.G.L..				Ma (40)	I (88)		29.07	83.7165	2.33	1.91571	-	-	3.49	1.341	2.33	0.191571	-	-	1.17	0.191571	-	-	1.17	0.191571	-	-	-	-	-	0.191571	-	-	-	-	-	-	-	-	-	-	-	-	-	-	-	-
M1	153 - 161	QIADSQHRS	S157A	86	523	I (59)	Ma (12)	Reversed	-	0.191205	12.8	2.29446	13.96	2.29446	-	-	-	-	1.17	0.191205	-	-	1.17	0.764818	-	-	11.63	1.91205	3.49	0.573614	3.49	0.764818	1.17	0.191205	3.49	0.956023	1.17	0.191205	-	0.191205	1.17	0.191205	3.49	0.573614	-	0.191205	1.17	0.191205	38
		....A....				Ma (38)	I (88)		27.91	83.7476	2.33	2.10325	-	-	3.49	1.33843	2.33	0.191205	-	-	1.17	0.191205	-	-	1.17	0.191205	-	-	-	-	-	0.191205	-	-	-	-	-	-	-	-	-	-	-	-	-	-	-	-
M1	162 - 170	HRQMVTTTN	V166A	86	522	I (57)	Ma (11)	Reversed	-	0.573614	12.8	2.10325	13.96	2.29446	-	-	-	-	1.17	0.191205	-	-	1.17	0.764818	-	-	9.31	1.52964	3.49	0.573614	3.49	0.764818	1.17	0.191205	3.49	0.956023	1.17	0.191205	-	0.191205	1.17	0.191205	3.49	0.573614	-	0.191205	1.17	0.191205	38
		....A....				Ma (40)	I (79)		29.07	75.1434	2.33	2.10325	-	-	3.49	1.33843	2.33	0.191205	-	-	1.17	0.191205	-	-	1.17	0.191205	-	-	-	-	-	0.191205	-	-	-	-	-	-	-	-	-	-	-	-	-	-	-	-
M1	219 - 227	IGTHPSSSA	#I219V, #S224N, #A227T	86	523	I (59)	Ma (11)	Reversed, Reversed, Reversed	-	0.191205	12.8	2.10325	13.96	2.29446	-	-	-	-	1.17	0.191205	-	-	1.17	0.764818	-	-	11.63	1.91205	3.49	0.573614	3.49	0.764818	1.17	0.191205	3.49	0.956023	1.17	0.191205	-	0.191205	1.17	0.191205	3.49	0.573614	-	0.191205	1.17	0.191205	38
		V....N..T				Ma (41)	I (87)		30.24	82.7916	2.33	2.10325	-	-	3.49	1.33843	2.33	0.191205	-	-	1.17	0.191205	-	-	1.17	0.191205	-	-	-	-	-	0.191205	-	-	-	-	-	-	-	-	-	-	-	-	-	-	-	-
M1	230 - 238	KDDLLENLQ	L234I	86	523	I (59)	Ma (11)	Reversed	-	0.191205	12.8	2.10325	13.96	2.29446	-	-	-	-	1.17	0.191205	-	-	1.17	0.764818	-	-	11.63	1.91205	3.49	0.573614	3.49	0.764818	1.17	0.191205	3.49	0.956023	1.17	0.191205	-	0.191205	1.17	0.191205	3.49	0.573614	-	0.191205	1.17	0.191205	38
		....I....				Ma (40)	I (86)		29.07	82.218	2.33	2.10325	-	-	3.49	1.14723	2.33	0.191205	-	-	1.17	0.191205	-	-	1.17	0.191205	-	-	-	-	-	0.191205	-	-	-	-	-	-	-	-	-	-	-	-	-	-	-	-
M1	241 - 249	QKRMGVQMQ	#K242N, #M248L	86	523	I (59)	Ma (12)	Reversed, Reversed	-	0.191205	12.8	2.29446	13.96	2.29446	-	-	-	-	1.17	0.191205	-	-	1.17	0.764818	-	-	11.63	1.91205	3.49	0.573614	3.49	0.764818	1.17	0.191205	3.49	0.956023	1.17	0.191205	-	0.191205	1.17	0.191205	3.49	0.573614	-	0.191205	1.17	0.191205	38
		.N.....L.				Ma (40)	I (86)		29.07	82.0268	2.33	1.91205	-	-	3.49	1.33843	2.33	0.191205	-	-	1.17	0.191205	-	-	1.17	0.191205	-	-	-	-	-	0.191205	-	-	-	-	-	-	-	-	-	-	-	-	-	-	-	-
M2	7 - 15	VETPTRNGW	#N13T	83	520	I (53)	Mi (10)	Reversed	-	0.192308	13.26	2.11538	13.26	2.11538	-	-	-	-	1.21	0.192308	-	-	1.21	0.769231	-	-	12.05	1.92308	1.21	0.192308	2.41	0.576923	-	-	1.21	0.769231	1.21	0.192308	-	0.192308	1.21	0.192308	3.62	0.576923	-	0.192308	1.21	0.192308	36
		......T..				Ma (31)	I (51)		25.31	49.2308	2.41	0.769231	-	-	2.41	0.769231	-	-	-	-	1.21	0.192308	-	-	-	-	-	-	-	-	-	-	-	-	-	-	-	-	-	-	-	-	-	-	-	-	-	-
M2	17 - 25	CKCSDSSDP	#K18N, D24E	84	522	I (39)	Mi (8)	Reversed, Reversed	-	0.191571	13.1	2.10728	4.77	0.766284	-	-	-	-	1.2	0.191571	-	-	1.2	0.766284	-	-	11.91	1.91571	-	-	3.58	0.766284	1.2	0.191571	1.2	0.191571	1.2	0.191571	-	0.191571	-	-	-	-	-	0.191571	-	-	38
		.N..G..E.				Ma (29)	I (46)		22.62	44.2529	2.39	0.766284	-	-	2.39	0.766284	-	-	-	-	1.2	0.191571	-	-	-	-	-	-	-	-	-	-	-	-	-	-	-	-	-	-	-	-	-	-	-	-	-	-
M2	25 - 33	PLVIAASII	I28V, #S31N	84	522	I (42)	Ma (9)	Reversed, Reversed	-	0.191571	13.1	2.10728	4.77	0.766284	-	-	-	-	1.2	0.191571	-	-	1.2	0.766284	-	-	11.91	1.91571	3.58	0.574713	2.39	0.574713	-	-	1.2	0.766284	1.2	0.191571	-	0.191571	1.2	0.191571	-	-	-	0.191571	-	-	38
		...V..N..				Ma (41)	I (80)		29.77	76.0536	2.39	2.10728	-	-	3.58	1.14943	2.39	0.191571	-	-	1.2	0.191571	-	-	1.2	0.191571	-	-	-	-	-	0.191571	-	-	-	-	-	-	-	-	-	-	-	-	-	-	-	-
M2	51 - 59	IYRRLKYGL	L55F	84	522	I (54)	Ma (11)	Reversed	-	1.14943	13.1	2.10728	11.91	1.91571	-	-	-	-	1.2	0.191571	-	-	1.2	0.766284	-	-	11.91	1.91571	3.58	0.574713	1.2	0.191571	1.2	0.191571	1.2	0.766284	1.2	0.191571	-	0.191571	1.2	0.191571	3.58	0.574713	-	0.191571	1.2	0.191571	38
		....F....				Ma (43)	I (87)		29.77	82.3755	2.39	2.10728	-	-	3.58	1.341	2.39	0.191571	-	-	1.2	0.191571	-	-	1.2	0.191571	-	-	-	-	2.39	0.766284	-	-	-	-	-	-	-	-	-	-	-	-	-	-	-	-
M2	64 - 72	STEGVPESM	#V68M	84	521	I (58)	Ma (12)	Reversed	-	0.575816	13.1	2.30326	14.29	2.30326	-	-	-	-	1.2	0.191939	-	-	1.2	0.767754	-	-	11.91	1.91939	3.58	0.575816	3.58	0.767754	1.2	0.191939	1.2	0.383877	1.2	0.191939	-	0.191939	1.2	0.191939	3.58	0.575816	-	0.191939	1.2	0.191939	38
		....M....				Ma (41)	I (87)		30.96	83.3013	1.2	1.91939	-	-	3.58	1.34357	2.39	0.191939	-	-	1.2	0.191939	-	-	1.2	0.191939	-	-	-	-	-	0.191939	-	-	-	-	-	-	-	-	-	-	-	-	-	-	-	-
M2	78 - 86	QEQQSAVDV	S82N	84	521	I (55)	Ma (11)	Reversed	-	0.383877	13.1	2.11132	13.1	2.11132	-	-	-	-	1.2	0.191939	-	-	1.2	0.767754	-	-	9.53	1.53551	3.58	0.575816	3.58	0.767754	1.2	0.191939	1.2	0.767754	1.2	0.191939	-	0.191939	1.2	0.191939	3.58	0.575816	-	0.191939	1.2	0.191939	38
		....N....				Ma (45)	I (88)		30.96	83.3013	2.39	2.30326	1.2	0.191939	3.58	1.34357	2.39	0.191939	-	-	1.2	0.191939	-	-	1.2	0.191939	2.39	0.383877	-	-	-	0.191939	-	-	-	-	-	-	-	-	-	-	-	-	-	-	-	-
M2	89 - 97	GHFVNIELE	E97K	82	502	I (56)	Ma (13)	Reversed	1.22	1.59363	12.2	2.39044	13.42	2.19124	-	0.398406	-	-	1.22	0.199203	-	-	1.22	0.796813	-	-	12.2	1.99203	3.66	0.59761	1.22	0.199203	1.22	0.199203	1.22	0.59761	1.22	0.199203	-	0.199203	1.22	0.199203	3.66	0.59761	-	0.199203	1.22	0.199203	35
		........K				Ma (41)	I (85)		30.49	81.2749	2.44	1.99203	-	-	3.66	0.996016	2.44	0.199203	-	-	1.22	0.199203	-	-	1.22	0.199203	-	-	-	-	-	0.199203	-	-	-	-	-	-	-	-	-	-	-	-	-	-	-	-
NS1	23 - 31	ADQELGDAP	L27M	87	536	I (58)	I (51)	Unchanged	1.15	40.2985	12.65	2.23881	13.8	2.23881	-	0.373134	-	-	1.15	0.186567	-	-	1.15	0.559701	-	-	11.5	1.86567	3.45	0.559701	3.45	0.932836	1.15	0.186567	3.45	0.932836	1.15	0.186567	-	0.186567	-	-	2.3	0.373134	-	0.186567	1.15	0.186567	38
		....M....				Ma (36)	Ma (25)		25.29	21.4552	2.3	2.23881	-	-	3.45	0.932836	2.3	0.186567	-	-	1.15	0.186567	-	-	1.15	0.186567	-	-	-	-	-	-	-	-	-	-	-	-	-	-	-	-	-	-	-	-	-	-
NS1	47 - 55	GSTLGLDIE	#G47S, E55R	87	536	I (55)	Ma (10)	Reversed, Reversed	-	0.186567	12.65	2.05224	12.65	2.05224	-	-	-	-	1.15	0.186567	-	-	1.15	0.559701	-	-	11.5	1.86567	3.45	0.559701	3.45	0.746269	1.15	0.186567	3.45	0.932836	1.15	0.186567	-	0.186567	-	-	2.3	0.373134	-	0.186567	1.15	0.186567	38
		S.......R				Ma (41)	I (88)		31.04	83.209	2.3	2.42537	-	-	3.45	1.30597	2.3	0.186567	-	-	1.15	0.186567	-	-	1.15	0.186567	-	-	-	-	-	0.186567	-	-	-	-	-	-	-	-	-	-	-	-	-	-	-	-
NS1	56 - 64	TATRAGKQI	A60E, Q63H	87	533	I (53)	Ma (10)	Reversed, Reversed	-	0.187266	12.65	2.05993	11.5	1.87266	-	-	-	-	1.15	0.187266	-	-	1.15	0.561798	-	-	11.5	1.87266	3.45	0.561798	3.45	0.749064	1.15	0.187266	2.3	0.749064	1.15	0.187266	-	0.187266	-	-	2.3	0.374532	-	0.187266	1.15	0.187266	38
		....E..H.				Ma (41)	I (83)		31.04	79.0262	2.3	2.24719	-	-	3.45	0.93633	2.3	0.187266	-	-	1.15	0.187266	-	-	1.15	0.187266	-	-	-	-	-	-	-	-	-	-	-	-	-	-	-	-	-	-	-	-	-	-
NS1	74 - 82	DEALKMTIA	#L77F, #T80S	86	535	I (57)	Ma (11)	Reversed, Reversed	-	0.186916	12.8	2.05607	13.96	2.24299	-	-	-	-	1.17	0.186916	-	-	1.17	0.560748	-	-	11.63	1.86916	3.49	0.560748	3.49	0.747664	1.17	0.186916	3.49	0.934579	1.17	0.186916	-	0.186916	-	-	2.33	0.373832	-	0.186916	1.17	0.186916	38
		...F..S..				Ma (40)	I (48)		29.07	43.9252	2.33	2.42991	-	-	3.49	0.934579	2.33	0.186916	-	-	1.17	0.186916	-	-	1.17	0.186916	-	-	-	-	-	-	-	-	-	-	-	-	-	-	-	-	-	-	-	-	-	-
NS1	83 - 91	SVPASRYLT	S87P	87	533	I (53)	Ma (10)	Reversed	-	0.186567	12.65	2.05224	13.8	2.23881	-	-	-	-	1.15	0.186567	-	-	1.15	0.559701	-	-	11.5	1.86567	3.45	0.559701	2.3	0.559701	1.15	0.186567	1.15	0.186567	1.15	0.186567	-	0.186567	-	-	2.3	0.373134	-	0.186567	1.15	0.186567	38
		....P....				Ma (40)	I (79)		29.89	74.8134	2.3	2.42537	-	-	3.45	0.932836	2.3	0.186567	-	-	1.15	0.186567	-	-	1.15	0.186567	-	-	-	-	-	-	-	-	-	-	-	-	-	-	-	-	-	-	-	-	-	-
NS1	100 - 108	RDWFMLMPK	F103L, M106I	87	536	I (56)	Ma (11)	Reversed, Reversed	-	0.186567	12.65	2.23881	13.8	2.23881	-	-	-	-	1.15	0.186567	-	-	1.15	0.559701	-	-	11.5	1.86567	3.45	0.559701	3.45	0.746269	1.15	0.186567	3.45	0.932836	1.15	0.186567	-	0.186567	-	-	2.3	0.373134	-	0.186567	1.15	0.186567	38
		...L..I..				Ma (41)	I (88)		31.04	83.9552	2.3	2.42537	-	-	3.45	1.30597	2.3	0.186567	-	-	1.15	0.186567	-	-	1.15	0.186567	-	-	-	-	-	0.186567	-	-	-	-	-	-	-	-	-	-	-	-	-	-	-	-
NS1	107 - 115	PKQKVAGSL	V111I, A112T	87	536	I (56)	Ma (11)	Reversed, Reversed	-	0.373134	12.65	2.05224	13.8	2.23881	-	-	-	-	1.15	0.186567	-	-	1.15	0.559701	-	-	11.5	1.86567	3.45	0.559701	3.45	0.746269	1.15	0.186567	3.45	0.932836	1.15	0.186567	-	0.186567	-	-	2.3	0.373134	-	0.186567	1.15	0.186567	38
		....IT...				Ma (41)	I (46)		31.04	42.5373	2.3	2.23881	-	-	3.45	0.932836	2.3	0.186567	-	-	1.15	0.186567	-	-	1.15	0.186567	-	-	-	-	-	-	-	-	-	-	-	-	-	-	-	-	-	-	-	-	-	-
NS1	122 - 130	AIMDKNIIL	M124V, I129T	87	536	I (44)	Ma (9)	Reversed, Reversed	-	0.186567	-	-	13.8	2.23881	-	-	-	-	1.15	0.186567	-	-	1.15	0.559701	-	-	11.5	1.86567	3.45	0.559701	3.45	0.746269	1.15	0.186567	3.45	0.932836	1.15	0.186567	-	0.186567	-	-	2.3	0.373134	-	0.186567	1.15	0.186567	38
		..V....T.				Ma (40)	I (82)		29.89	78.5448	2.3	1.86567	-	-	3.45	0.932836	2.3	0.186567	-	-	1.15	0.186567	-	-	1.15	0.186567	-	-	-	-	-	-	-	-	-	-	-	-	-	-	-	-	-	-	-	-	-	-
NS1	137 - 145	IFDRLETLI	D139N, T143A	87	536	I (55)	Ma (10)	Reversed, Reversed	-	0.186567	12.65	2.05224	12.65	2.05224	-	-	-	-	1.15	0.186567	-	-	1.15	0.559701	-	-	11.5	1.86567	3.45	0.559701	3.45	0.746269	1.15	0.186567	3.45	0.932836	1.15	0.186567	-	0.186567	-	-	2.3	0.373134	-	0.186567	1.15	0.186567	38
		..N...A..				Ma (40)	I (83)		29.89	79.1045	2.3	2.42537	-	-	3.45	1.1194	2.3	0.186567	-	-	1.15	0.186567	-	-	1.15	0.186567	-	-	-	-	-	0.186567	-	-	-	-	-	-	-	-	-	-	-	-	-	-	-	-
NS1	168 - 176	GHTDEDVKN	E172K	87	536	I (55)	Ma (10)	Reversed	-	0.186567	12.65	2.05224	13.8	2.23881	-	-	-	-	1.15	0.186567	-	-	1.15	0.559701	-	-	10.35	1.6791	3.45	0.559701	3.45	0.746269	1.15	0.186567	3.45	0.932836	1.15	0.186567	-	0.186567	-	-	2.3	0.373134	-	0.186567	1.15	0.186567	38
		....K....				Ma (43)	I (88)		31.04	83.5821	2.3	2.23881	-	-	3.45	1.30597	2.3	0.186567	-	-	1.15	0.186567	-	-	1.15	0.186567	1.15	0.186567	-	-	-	0.186567	-	-	-	-	-	-	-	-	-	-	-	-	-	-	-	-
NS1	178 - 186	IGVLIGGLE	G179E, V180I, L185F	87	534	I (55)	Ma (11)	Reversed, Reversed, Reversed	-	0.187266	12.65	2.24719	13.8	2.24719	-	-	-	-	1.15	0.187266	-	-	1.15	0.561798	-	-	11.5	1.87266	2.3	0.374532	3.45	0.749064	1.15	0.187266	3.45	0.93633	1.15	0.187266	-	0.187266	-	-	2.3	0.374532	-	0.187266	1.15	0.187266	38
		.EI....F.				Ma (40)	I (83)		29.89	79.0262	2.3	2.24719	-	-	3.45	0.93633	2.3	0.187266	-	-	1.15	0.187266	-	-	1.15	0.187266	-	-	-	-	-	-	-	-	-	-	-	-	-	-	-	-	-	-	-	-	-	-
NS1	203 - 211	WRSSNEDGR	N207D	87	536	I (48)	Ma (20)	Reversed	-	11.3806	12.65	2.05224	13.8	2.23881	-	-	-	-	1.15	0.186567	-	-	1.15	0.373134	-	-	9.2	1.49254	2.3	0.373134	2.3	0.559701	-	-	1.15	0.186567	1.15	0.186567	-	0.186567	-	-	2.3	0.373134	-	0.186567	1.15	0.186567	38
		....D....				Ma (39)	I (61)		28.74	57.6493	2.3	2.23881	-	-	3.45	0.932836	2.3	0.186567	-	-	1.15	0.186567	-	-	1.15	0.186567	-	-	-	-	-	-	-	-	-	-	-	-	-	-	-	-	-	-	-	-	-	-
NS1	208 - 216	EDGRPPLPP	P212S, P215S, #P216T	87	533	I (56)	Mi (11)	Reversed, Reversed, Reversed	-	0.375235	12.65	2.06379	13.8	2.25141	-	-	-	-	1.15	0.187617	-	-	1.15	0.562852	-	-	11.5	1.87617	3.45	0.562852	3.45	0.750469	1.15	0.187617	3.45	0.938086	1.15	0.187617	-	0.187617	-	-	2.3	0.375235	-	0.187617	1.15	0.187617	38
		....S..ST				Ma (37)	I (42)		27.59	39.212	1.15	1.68856	-	-	3.45	0.938086	2.3	0.187617	-	-	1.15	0.187617	-	-	1.15	0.187617	-	-	-	-	-	-	-	-	-	-	-	-	-	-	-	-	-	-	-	-	-	-
NS2	14 - 22	MRMSKMQLG	#M14T, G22R	85	534	I (54)	Ma (10)	Reversed, Reversed	-	0.187266	12.95	2	14.12	2.24719	-	-	-	-	1.18	0.187266	-	-	1.18	0.561798	-	-	10.59	1.68539	3.53	0.561798	3.53	0.749064	1.18	0.187266	1.18	0.749064	1.18	0.187266	-	0.187266	-	-	2.36	0.374532	-	0.187266	1.18	0.187266	38
		T.......R				Ma (42)	I (82)		31.77	78.4644	2.36	2.24719	-	-	3.53	0.93633	2.36	0.187266	-	-	1.18	0.187266	-	-	1.18	0.187266	-	-	-	-	-	-	-	-	-	-	-	-	-	-	-	-	-	-	-	-	-	-
NS2	45 - 53	LGEAVMRMG	V49A	85	535	I (55)	Ma (11)	Reversed	-	0.186916	12.95	2.24299	14.12	2.24299	-	-	-	-	1.18	0.186916	-	-	1.18	0.560748	-	-	11.77	1.86916	3.53	0.560748	3.53	0.747664	1.18	0.186916	1.18	0.747664	1.18	0.186916	-	0.186916	-	-	2.36	0.373832	-	0.186916	1.18	0.186916	38
		....A....				Ma (40)	I (79)		29.42	74.5794	2.36	2.42991	-	-	3.53	1.30841	2.36	0.186916	-	-	1.18	0.186916	-	-	1.18	0.186916	-	-	-	-	-	0.186916	-	-	-	-	-	-	-	-	-	-	-	-	-	-	-	-
a The HA protein sequence numeration is based on the H7N9 HA protein sequence alignment for consistency with other proteins. However, the literature generally uses H7 numeration without the 18 amino acids of the signal peptide. Thus, in order to correspond our position numbers to H7 numeration, 18aa of the signal peptide needs to be subtracted. Additionally, the nonamer sequences provided would h…
[truncated: 16 more columns]

## Sheet: SupTable3B
Supplementary Table 3B | Substitution identified in the avian H7N9 virus sequences from 2014 and 2017 datasets.
Proteina	Positionb	Nonamer sequence (Avian & Human) c	Amino acid substitutiond	Avian virus sequencese
				Number of sequences (#) f		Motif (incidence, %)g		Net motif change for each substitution between 2014 and 2017 datasetsh	Avian species source of isolation (%)
									Chicken		Duck (domestic)		Wild duck		Pigeon		Tree sparrow		Anas crecca		Wild pigeon		Mallard		Homing pigeon		Turkey		Blue-winged teal		Goose		Guinea fowl		Ruddy turnstone		Northern shoverl		Shoveler		Emperor goose		Wild bird		Teal		Spot-billed duck
				2014	2017	2014	2017		2014	2017	2014	2017	2014	2017	2014	2017	2014	2017	2014	2017	2014	2017	2014	2017	2014	2017	2014	2017	2014	2017	2014	2017	2014	2017	2014	2017	2014	2017	2014	2017	2014	2017	2014	2017	2014	2017	2014	2017
PB2	187 - 195	KEKKEELQD	E191K	83	517	I (55)	I (83)	Unchanged	4.82	71	13.26	3	9.64	2	-	0	-	-	1.21	0	-	-	1.21	1	-	-	9.64	2	3.62	1	3.62	1	1.21	0	2.41	1	1.21	0	-	-	-	-	3.62	1	-	0	-	-
		....K....				Ma (36)	Ma (14)		25.31	12	2.41	1	-	-	3.62	1	2.41	0	-	-	1.21	0	-	-	1.21	0	-	-	-	-	-	-	-	-	-	-	-	-	-	-	-	-	-	-	-	-	-	-
PB2	288 - 296	QIGGIRMVD	#I292V	84	518	I (56)	Ma (11)	Reversed	-	1	13.1	2	14.29	2	-	-	-	-	1.2	0	-	-	1.2	1	-	-	10.72	2	3.58	1	1.2	0	1.2	0	2.39	1	1.2	0	-	0	1.2	0	3.58	1	-	0	1.2	0
		....V....				Ma (44)	I (88)		30.96	84	2.39	2	-	-	3.58	1	2.39	0	-	-	1.2	0	-	-	1.2	0	-	-	-	-	2.39	1	-	-	-	-	-	-	-	0	-	-	-	-	-	-	-	-
PB2	385 - 393	IVSGRDEQS	#R389K	84	518	I (57)	Ma (11)	Reversed	-	0	13.1	2	13.1	2	-	-	-	-	1.2	0	-	-	1.2	1	-	-	10.72	2	3.58	1	3.58	1	1.2	0	2.39	1	1.2	0	-	0	1.2	0	3.58	1	-	0	1.2	0
		....K....				Ma (39)	I (86)		28.58	83	2.39	2	-	-	3.58	1	2.39	0	-	-	1.2	0	-	-	1.2	0	-	-	-	-	-	0	-	-	-	-	-	-	-	-	-	-	-	-	-	-	-	-
PB2	555 - 563	RNWETVKIQ	T559N	81	515	I (63)	I (84)	Unchanged	6.18	73	13.59	3	14.82	2	-	0	-	-	1.24	0	-	-	1.24	1	-	-	7.41	1	3.71	1	3.71	1	1.24	0	2.47	1	1.24	0	-	0	1.24	0	3.71	1	-	0	1.24	0
		....N....				Ma (37)	Ma (14)		25.93	12	2.47	1	-	-	3.71	1	2.47	0	-	-	1.24	0	-	-	1.24	0	-	-	-	-	-	-	-	-	-	-	-	-	-	-	-	-	-	-	-	-	-	-
PB2	566 - 574	QDPTILYNK	I570M	-	513	N/A	I (61)	New	-	60	-	1	-	-	-	-	-	-	-	-	-	-	-	-	-	-	-	-	-	-	-	0	-	-	-	-	-	-	-	-	-	-	-	-	-	-	-	-
		....M....				N/A	Ma (33)		-	21	-	3	-	2	-	1	-	0	-	0	-	0	-	1	-	0	-	1	-	1	-	1	-	-	-	1	-	0	-	0	-	0	-	1	-	0	-	0
PB2	644 - 652	GMRILVRGN	#L648V	81	515	I (52)	Mi (9)	Reversed	-	0	13.59	2	14.82	2	-	-	-	-	1.24	0	-	-	1.24	1	-	-	2.47	0	3.71	1	3.71	1	1.24	0	2.47	1	1.24	0	-	0	1.24	0	3.71	1	-	0	1.24	0
		....V....				Ma (40)	I (52)		28.4	50	2.47	1	-	-	3.71	1	2.47	0	-	-	1.24	0	-	-	1.24	0	-	-	-	-	-	-	-	-	-	-	-	-	-	-	-	-	-	-	-	-	-	-
PB2	672 - 680	AGALTEDPD	#T676M	81	513	I (56)	Mi (10)	Reversed	-	0	13.59	2	14.82	2	-	-	-	-	1.24	0	-	-	1.24	1	-	-	7.41	1	3.71	1	3.71	1	1.24	0	2.47	1	1.24	0	-	0	-	-	3.71	1	-	0	1.24	0
		....M....				Ma (43)	I (52)		32.1	49	2.47	2	-	-	3.71	1	2.47	0	-	-	1.24	0	-	-	1.24	0	-	-	-	-	-	0	-	-	-	-	-	-	-	-	-	-	-	-	-	-	-	-
PB1	10 - 18	LKVPAQNAI	#A14V	75	508	I (52)	Ma (18)	Reversed	-	9.05512	14.67	2.3622	16	2.3622	-	-	-	-	1.34	0.19685	-	-	1.34	0.787402	-	-	2.67	0.393701	4	0.590551	2.67	0.590551	-	-	1.34	0.19685	1.34	0.19685	-	0.19685	1.34	0.19685	4	0.590551	-	0.19685	1.34	0.19685
		....V....				Ma (47)	I (81)		34.67	76.9685	2.67	2.16535	-	-	4	1.37795	2.67	0.19685	-	-	1.34	0.19685	-	-	1.34	0.19685	-	-	-	-	-	0.19685	-	-	-	-	-	-	-	-	-	-	-	-	-	-	-	-
PB1	44 - 52	NRTHQYSEK	#Q48K	85	519	I (59)	Ma (12)	Reversed	-	0.385356	12.95	2.31214	14.12	2.31214	-	-	-	-	1.18	0.192678	-	-	1.18	0.770713	-	-	11.77	1.92678	3.53	0.578035	3.53	0.770713	1.18	0.192678	2.36	0.578035	1.18	0.192678	-	0.192678	1.18	0.192678	3.53	0.578035	-	0.192678	1.18	0.192678
		....K....				Ma (41)	I (80)		30.59	75.3372	2.36	2.11946	-	-	3.53	1.34875	2.36	0.192678	-	-	1.18	0.192678	-	-	1.18	0.192678	-	-	-	-	-	0.192678	-	-	-	-	-	-	-	-	-	-	-	-	-	-	-	-
PB1	109 - 117	ETMEVVQQT	V113I	85	519	I (59)	Ma (11)	Reversed	-	0.192678	12.95	2.31214	14.12	2.31214	-	-	-	-	1.18	0.192678	-	-	1.18	0.578035	-	-	11.77	1.92678	3.53	0.578035	3.53	0.770713	1.18	0.192678	2.36	0.578035	1.18	0.192678	-	0.192678	1.18	0.192678	3.53	0.578035	-	0.192678	1.18	0.192678
		....I....				Ma (41)	I (89)		30.59	84.1753	2.36	2.11946	-	-	3.53	1.34875	2.36	0.192678	-	-	1.18	0.192678	-	0.192678	1.18	0.192678	-	-	-	-	-	0.192678	-	-	-	-	-	-	-	-	-	-	-	-	-	-	-	-
PB1	168 - 176	KDVMESMDK	#E172D	85	519	I (59)	Mi (12)	Reversed	-	0.385356	12.95	2.31214	14.12	2.31214	-	-	-	-	1.18	0.192678	-	-	1.18	0.770713	-	-	11.77	1.92678	3.53	0.578035	3.53	0.770713	1.18	0.192678	2.36	0.578035	1.18	0.192678	-	0.192678	1.18	0.192678	3.53	0.578035	-	0.192678	1.18	0.192678
		....D....				Ma (39)	I (51)		28.24	47.3988	2.36	1.7341	-	-	3.53	1.34875	2.36	0.192678	-	-	1.18	0.192678	-	-	1.18	0.192678	-	-	-	-	-	0.192678	-	-	-	-	-	-	-	-	-	-	-	-	-	-	-	-
PB1	253 - 261	YFVETLARS	#T257A	85	518	I (59)	Ma (12)	Reversed	-	0.963391	12.95	2.31214	14.12	2.31214	-	-	-	-	1.18	0.192678	-	-	1.18	0.770713	-	-	11.77	1.92678	3.53	0.578035	3.53	0.770713	1.18	0.192678	2.36	0.578035	1.18	0.192678	-	0.192678	1.18	0.192678	3.53	0.578035	-	0.192678	1.18	0.192678
		....A....				Ma (41)	I (87)		30.59	82.8516	2.36	1.92678	-	-	3.53	1.34875	2.36	0.192678	-	-	1.18	0.192678	-	-	1.18	0.192678	-	-	-	-	-	0.192678	-	-	-	-	-	-	-	-	-	-	-	-	-	-	-	-
PB1	364 - 372	LRTQIPAEM	#I368V	85	518	I (55)	Ma (12)	Reversed	-	1.54143	12.95	2.31214	12.95	2.11946	-	-	-	-	1.18	0.192678	-	-	1.18	0.578035	-	-	11.77	1.92678	3.53	0.578035	1.18	0.192678	1.18	0.192678	2.36	0.578035	1.18	0.192678	-	0.192678	1.18	0.192678	3.53	0.578035	-	0.192678	1.18	0.192678
		....V....				Ma (41)	I (77)		30.59	72.8324	2.36	1.92678	-	-	3.53	1.34875	2.36	0.192678	-	-	1.18	0.192678	-	0.192678	1.18	0.192678	-	-	-	-	-	0.192678	-	-	-	-	-	-	-	-	-	-	-	-	-	-	-	-
PB1	381 - 389	FNESTRKKI	#E383K, #K387E	85	519	I (58)	Ma (11)	Reversed, Reversed	-	0.192678	12.95	2.31214	12.95	2.11946	-	-	-	-	1.18	0.192678	-	-	1.18	0.770713	-	-	11.77	1.92678	3.53	0.578035	3.53	0.770713	1.18	0.192678	2.36	0.578035	1.18	0.192678	-	0.192678	1.18	0.192678	3.53	0.578035	-	0.192678	1.18	0.192678
		..K...E..				Ma (41)	I (88)		30.59	84.3931	2.36	1.92678	-	-	3.53	1.34875	2.36	0.192678	-	-	1.18	0.192678	-	-	1.18	0.192678	-	-	-	-	-	0.192678	-	-	-	-	-	-	-	-	-	-	-	-	-	-	-	-
PB1	423 - 431	ILNLGQKRY	#R430K	85	519	I (49)	Ma (9)	Reversed	-	0.192678	12.95	2.11946	14.12	2.31214	-	-	-	-	1.18	0.192678	-	-	1.18	0.770713	-	-	8.24	1.34875	3.53	0.578035	-	-	-	-	2.36	0.578035	1.18	0.192678	-	0.192678	-	-	3.53	0.578035	-	0.192678	1.18	0.192678
		.......K.				Ma (49)	I (90)		30.59	84.3931	2.36	2.31214	-	-	3.53	1.34875	2.36	0.192678	-	-	1.18	0.192678	-	-	1.18	0.192678	2.36	0.385356	-	-	3.53	0.963391	1.18	0	-	-	-	-	-	-	1.18	0.192678	-	-	-	-	-	-
PB1	521 - 529	ADMSIGVTV	I525V	85	519	I (73)	I (67)	Unchanged	11.77	53.9499	14.12	3.27553	14.12	2.31214	1.18	0.578035	-	-	1.18	0.192678	-	-	1.18	0.770713	-	-	11.77	1.92678	3.53	0.578035	3.53	0.770713	1.18	0.192678	2.36	0.578035	1.18	0.192678	-	0.192678	1.18	0.192678	3.53	0.578035	-	0.192678	1.18	0.192678
		....V....				Ma (27)	Ma (33)		18.83	30.4432	1.18	1.15607	-	-	2.36	0.770713	2.36	0.192678	-	-	1.18	0.192678	-	-	1.18	0.192678	-	-	-	-	-	0.192678	-	-	-	-	-	-	-	-	-	-	-	-	-	-	-	-
PB1	569 - 577	QTRRSFELK	#S573A	85	519	I (60)	Ma (11)	Reversed	1.18	0.192678	12.95	2.31214	14.12	2.31214	-	-	-	-	1.18	0.192678	-	-	1.18	0.770713	-	-	11.77	1.92678	3.53	0.578035	3.53	0.770713	1.18	0.192678	2.36	0.578035	1.18	0.192678	-	0.192678	1.18	0.192678	3.53	0.578035	-	0.192678	1.18	0.192678
		....A....				Ma (39)	I (88)		29.42	84.2004	2.36	2.11946	-	-	3.53	1.34875	1.18	0.192678	-	-	1.18	0.192678	-	-	1.18	0.192678	-	-	-	-	-	0.192678	-	-	-	-	-	-	-	-	-	-	-	-	-	-	-	-
PB1	624 - 632	LCNPLNPFV	#L628M	85	519	I (59)	Ma (11)	Reversed	-	0.192678	12.95	2.31214	14.12	2.31214	-	-	-	-	1.18	0.192678	-	-	1.18	0.770713	-	-	11.77	1.92678	3.53	0.578035	3.53	0.770713	1.18	0.192678	2.36	0.578035	1.18	0.192678	-	0.192678	1.18	0.192678	3.53	0.578035	-	0.192678	1.18	0.192678
		....M....				Ma (41)	I (88)		30.59	83.815	2.36	2.11946	-	-	3.53	1.34875	2.36	0.192678	-	-	1.18	0.192678	-	-	1.18	0.192678	-	-	-	-	-	0.192678	-	-	-	-	-	-	-	-	-	-	-	-	-	-	-	-
PB1	634 - 642	HKEIESVNN	#E638D	85	519	I (59)	Ma (11)	Reversed	-	0.192678	12.95	2.31214	14.12	2.31214	-	-	-	-	1.18	0.192678	-	-	1.18	0.770713	-	-	11.77	1.92678	3.53	0.578035	3.53	0.770713	1.18	0.192678	2.36	0.578035	1.18	0.192678	-	0.192678	1.18	0.192678	3.53	0.578035	-	0.192678	1.18	0.192678
		....D....				Ma (41)	I (80)		30.59	75.5299	2.36	2.11946	-	-	3.53	1.34875	2.36	0.192678	-	-	1.18	0.192678	-	-	1.18	0.192678	-	-	-	-	-	0.192678	-	-	-	-	-	-	-	-	-	-	-	-	-	-	-	-
PA	33 - 41	NKFAAICTH	#A37S	81	518	I (57)	Ma (11)	Reversed	-	0.19305	13.59	2.3166	14.82	2.3166	-	-	-	-	1.24	0.19305	-	-	1.24	0.772201	-	-	7.41	1.1583	3.71	0.579151	3.71	0.772201	1.24	0.19305	2.47	0.579151	1.24	0.19305	-	0.19305	1.24	0.19305	3.71	0.579151	-	0.19305	1.24	0.19305
		....S....				Ma (42)	I (88)		30.87	84.1699	2.47	2.12355	-	-	3.71	1.35135	2.47	0.19305	-	-	1.24	0.19305	-	-	1.24	0.19305	-	-	-	-	-	0.19305	-	-	-	-	-	-	-	-	-	-	-	-	-	-	-	-
PA	58 - 66	GESIIVESG	#I61T, #V63I	81	517	I (56)	Ma (10)	Reversed, Reversed	-	0.193424	13.59	2.12766	14.82	2.32108	-	-	-	-	1.24	0.193424	-	-	1.24	0.773694	-	-	7.41	1.16054	3.71	0.580271	3.71	0.773694	1.24	0.193424	1.24	0.386847	1.24	0.193424	-	0.193424	1.24	0.193424	3.71	0.580271	-	0.193424	1.24	0.193424
		...T.I...				Ma (43)	I (85)		32.1	80.4642	2.47	2.12766	-	-	3.71	1.35397	2.47	0.193424	-	-	1.24	0.193424	-	-	1.24	0.193424	-	-	-	-	-	0.193424	-	-	-	-	-	-	-	-	-	-	-	-	-	-	-	-
PA	92 - 100	NSICNTTGV	V100A	81	515	I (66)	I (43)	Unchanged	7.41	31.4563	14.82	3.30097	14.82	2.3301	-	0.38835	-	-	1.24	0.194175	-	-	1.24	0.776699	-	-	7.41	1.16505	3.71	0.582524	3.71	0.970874	1.24	0.194175	2.47	0.582524	1.24	0.194175	-	0.194175	1.24	0.194175	3.71	0.582524	-	0.194175	1.24	0.194175
		........A				Ma (35)	Ma (38)		24.7	34.9515	1.24	1.16505	-	-	3.71	0.970874	2.47	0.194175	-	-	1.24	0.194175	-	-	1.24	0.194175	-	-	-	-	-	-	-	-	-	-	-	-	-	-	-	-	-	-	-	-	-	-
PA	257 - 265	IEPFLKTTP	#K262R	81	516	I (59)	Ma (29)	Reversed	3.71	18.4109	13.59	2.51938	14.82	2.32558	-	0.193798	-	-	1.24	0.193798	-	-	1.24	0.775194	-	-	7.41	1.16279	3.71	0.581395	3.71	0.968992	1.24	0.193798	2.47	0.581395	1.24	0.193798	-	0.193798	1.24	0.193798	2.47	0.387597	-	0.193798	1.24	0.193798
		.....R...				Ma (41)	I (66)		28.4	62.2093	2.47	1.74419	-	-	3.71	1.16279	2.47	0.193798	-	-	1.24	0.193798	-	-	1.24	0.193798	-	-	-	-	-	-	-	-	-	-	-	-	-	-	-	-	1.24	0.193798	-	-	-	-
PA	333 - 341	NYLLAWKQV	#A337T	82	513	I (57)	Mi (11)	Reversed	-	0.581395	13.42	2.13178	14.64	2.32558	-	-	-	-	1.22	0.193798	-	-	1.22	0.775194	-	-	8.54	1.35659	3.66	0.581395	3.66	0.775194	1.22	0.193798	2.44	0.581395	1.22	0.193798	-	0.193798	1.22	0.193798	3.66	0.581395	-	0.193798	1.22	0.193798
		....T....				Ma (41)	I (69)		30.49	65.1163	2.44	2.13178	-	-	3.66	1.35659	2.44	0.193798	-	-	1.22	0.193798	-	-	1.22	0.193798	-	-	-	-	-	0.193798	-	-	-	-	-	-	-	-	-	-	-	-	-	-	-	-
PA	352 - 360	EKIPKTKNM	#K356R	82	513	I (56)	Ma (29)	Reversed	1.22	19.2982	13.42	2.14425	14.64	2.33918	-	-	-	-	1.22	0.194932	-	-	1.22	0.779727	-	-	8.54	1.36452	3.66	0.584795	2.44	0.584795	-	-	2.44	0.584795	1.22	0.194932	-	0.194932	1.22	0.194932	3.66	0.584795	-	-	1.22	0.194932
		....R....				Ma (39)	I (69)		28.05	64.7173	2.44	2.33918	-	-	3.66	1.36452	2.44	0.194932	-	-	1.22	0.194932	-	-	1.22	0.194932	-	-	-	-	-	0.194932	-	-	-	-	-	-	-	-	-	-	-	-	-	-	-	-
PA	387 - 395	VSDLRQYDS	#S388N, D394N	82	516	I (41)	Mi (8)	Reversed, Unchanged	-	0.193798	13.42	2.13178	14.64	2.32558	-	-	-	-	-	-	-	-	-	0.193798	-	-	-	-	3.66	0.581395	2.44	0.581395	-	-	1.22	0.387597	1.22	0.193798	-	0.193798	-	-	3.66	0.581395	-	0.193798	1.22	0.193798
		.N..K..N.				Ma (34)	Ma (37)		24.4	34.6899	1.22	0.968992	-	-	3.66	0.968992	2.44	0.193798	-	-	1.22	0.193798	-	-	1.22	0.193798	-	-	-	-	-	-	-	-	-	-	-	-	-	-	-	-	-	-	-	-	-	-
PA	407 - 415	IQSEFNKAC	#S409N	83	513	I (63)	Ma (20)	Reversed	3.62	9.35673	14.46	2.33918	14.46	2.33918	-	0.194932	-	-	1.21	0.194932	-	-	1.21	0.779727	-	-	9.64	1.55945	3.62	0.584795	3.62	0.779727	1.21	0.194932	2.41	0.584795	1.21	0.194932	-	0.194932	1.21	0.194932	3.62	0.584795	-	0.194932	1.21	0.194932
		..N......				Ma (37)	I (79)		27.72	74.8538	1.21	2.14425	-	-	3.62	1.16959	2.41	0.194932	-	-	1.21	0.194932	-	-	1.21	0.194932	-	-	-	-	-	0.194932	-	-	-	-	-	-	-	-	-	-	-	-	-	-	-	-
PA	419 - 427	DSSWIELDE	#I423V	84	516	I (58)	Ma (11)	Reversed	-	0.581395	13.1	2.13178	14.29	2.32558	-	-	-	-	1.2	0.193798	-	-	1.2	0.775194	-	-	10.72	1.74419	3.58	0.581395	3.58	0.775194	1.2	0.193798	2.39	0.581395	1.2	0.193798	-	0.193798	1.2	0.193798	3.58	0.581395	-	0.193798	1.2	0.193798
		....V....				Ma (41)	I (86)		29.77	81.3953	2.39	2.13178	-	-	3.58	1.35659	2.39	0.193798	-	-	1.2	0.193798	-	-	1.2	0.193798	-	-	-	-	-	0.193798	-	-	-	-	-	-	-	-	-	-	-	-	-	-	-	-
PA	550 - 558	LRTAIGQVS	#I554V	84	515	I (58)	Ma (11)	Reversed	-	0.582524	13.1	2.13592	14.29	2.3301	-	-	-	-	1.2	0.194175	-	-	1.2	0.776699	-	-	10.72	1.74757	3.58	0.582524	3.58	0.776699	1.2	0.194175	2.39	0.582524	1.2	0.194175	-	0.194175	1.2	0.194175	3.58	0.582524	-	0.194175	1.2	0.194175
		....V....				Ma (42)	I (89)		30.96	84.466	2.39	2.13592	-	-	3.58	1.35922	2.39	0.194175	-	-	1.2	0.194175	-	-	1.2	0.194175	-	-	-	-	-	0.194175	-	-	-	-	-	-	-	-	-	-	-	-	-	-	-	-
PA	603 - 611	KEKDMTKEF	#M607L	84	515	I (57)	Ma (11)	Reversed	-	0.194175	13.1	2.3301	14.29	2.3301	-	-	-	-	1.2	0.194175	-	-	1.2	0.776699	-	-	10.72	1.74757	3.58	0.582524	3.58	0.776699	1.2	0.194175	2.39	0.582524	-	-	-	0.194175	1.2	0.194175	3.58	0.582524	-	0.194175	1.2	0.194175
		....L....				Ma (42)	I (85)		30.96	81.3592	2.39	2.13592	-	-	3.58	1.16505	2.39	0.194175	-	-	1.2	0.194175	-	-	1.2	0.194175	-	-	-	-	-	0.194175	-	-	-	-	-	-	-	-	-	-	-	-	-	-	-	-
PA	680 - 688	TFDLGGLYE	#G684E	83	511	I (58)	Ma (12)	Reversed	-	0.782779	13.26	2.34834	13.26	2.15264	-	-	-	-	1.21	0.195695	-	-	1.21	0.782779	-	-	10.85	1.76125	3.62	0.587084	3.62	0.782779	1.21	0.195695	2.41	0.587084	1.21	0.195695	-	0.195695	1.21	0.195695	3.62	0.587084	-	0.195695	1.21	0.195695
		....E....				Ma (42)	I (89)		31.33	84.5401	2.41	2.15264	-	-	3.62	1.36986	2.41	0.195695	-	-	1.21	0.195695	-	-	1.21	0.195695	-	-	-	-	-	0.195695	-	-	-	-	-	-	-	-	-	-	-	-	-	-	-	-
PA	708 - 716	NSFLTHALK	K716R	79	509	I (57)	Ma (11)	Reversed	-	0.588235	13.93	2.35294	10.13	1.56863	-	-	-	-	1.27	0.196078	-	-	1.27	0.784314	-	-	11.4	1.76471	3.8	0.588235	3.8	0.784314	1.27	0.196078	2.54	0.588235	1.27	0.196078	-	0.196078	1.27	0.196078	3.8	0.588235	-	0.196078	1.27	0.196078
		........R				Ma (43)	I (78)		32.92	74.7059	2.54	1.96078	-	-	3.8	0.980392	1.27	0.196078	-	-	1.27	0.196078	-	-	1.27	0.196078	-	-	-	-	-	0.196078	-	-	-	-	-	-	-	-	-	-	-	-	-	-	-	-
PA_X	33 - 41	NKFAAICTH	A37S	80	485	I (58)	Ma (11)	Reversed	-	0	13.75	2.47423	15	2.47423	-	-	-	-	1.25	0.206186	-	-	1.25	0.824742	-	-	7.5	1.23711	3.75	0.618557	3.75	0.618557	1.25	0.206186	2.5	0.618557	1.25	0.206186	-	-	1.25	0.206186	3.75	0.618557	-	-	1.25	0.206186
		....S....				Ma (41)	I (89)		30	84.9485	2.5	1.85567	-	-	3.75	1.4433	2.5	0.206186	-	-	1.25	0.206186	-	-	1.25	0.206186	-	-	-	-	-	0.206186	-	-	-	-	-	-	-	-	-	-	-	-	-	-	-	-
PA_X	58 - 66	GESIIVESG	I61T, V63I	79	484	I (56)	Ma (10)	Reversed, Reversed	-	0	13.93	2.26804	15.19	2.47423	-	-	-	-	1.27	0.206186	-	-	1.27	0.824742	-	-	6.33	1.03093	3.8	0.618557	3.8	0.618557	1.27	0.206186	1.27	0.412371	1.27	0.206186	-	-	1.27	0.206186	3.8	0.618557	-	-	1.27	0.206186
		...T.I...				Ma (43)	I (85)		31.65	80.8247	2.54	1.85567	-	-	3.8	1.4433	2.54	0.206186	-	-	1.27	0.206186	-	-	1.27	0.206186	-	-	-	-	-	0.206186	-	-	-	-	-	-	-	-	-	-	-	-	-	-	-	-
PA_X	92 - 100	NSICNTTGV	V100A	80	482	I (66)	I (42)	Unchanged	7.5	30.4979	15	3.11203	15	2.48963	-	0.414938	-	-	1.25	0.207469	-	-	1.25	0.829876	-	-	7.5	1.24481	3.75	-	3.75	0.829876	1.25	0.207469	2.5	0.622407	1.25	0.207469	-	-	1.25	0.207469	3.75	0.622407	-	-	1.25	0.207469
		........A				Ma (34)	Ma (39)		23.75	35.6846	1.25	1.24481	-	-	3.75	1.03734	2.5	0.207469	-	-	1.25	0.207469	-	-	1.25	0.207469	-	-	-	-	-	-	-	-	-	-	-	-	-	-	-	-	-	-	-	-	-	-
PA_X	192 - 200	VSPREAKRQ	P194L, R195K, R199K	80	481	I (45)	Mi (8)	Unchanged, Reversed, Reversed	-	0	13.75	2.2869	15	2.4948	-	-	-	-	1.25	0.2079	-	-	1.25	0.831601	-	-	-	-	3.75	0.623701	2.5	0.4158	-	-	1.25	0.4158	1.25	0.2079	-	-	-	-	3.75	0.623701	-	-	1.25	0.2079
		..LK...K.				Ma (36)	Ma (33)		25	30.3534	2.5	0.831601	-	-	3.75	1.2474	2.5	0.2079	-	-	1.25	0.2079	-	-	1.25	0.2079	-	-	-	-	-	-	-	-	-	-	-	-	-	-	-	-	-	-	-	-	-	-
PA_X	243 - 251	RASFLKCQK	K248R	77	477	I (58)	I (60)	Unchanged	7.8	49.6855	15.59	3.14465	15.59	2.51572	-	0.419287	-	-	1.3	0.209644	-	-	1.3	0.628931	-	-	3.9	0.628931	-	-	3.9	0.838574	1.3	0.209644	1.3	0.209644	-	-	-	-	1.3	0.209644	3.9	0.628931	-	-	1.3	0.209644
		.....R...				Ma (35)	Ma (39)		24.68	36.0587	1.3	1.04822	-	-	3.9	1.04822	2.6	0.209644	-	-	1.3	0.209644	-	-	1.3	0.209644	-	-	-	-	-	-	-	-	-	-	-	-	-	-	-	-	-	-	-	-	-	-
HA	61 - 69	SKGKKTVDL	K65R	-	626	N/A	I (45)	New	-	44.7284	-	0.159744	-	-	-	-	-	-	-	-	-	0.159744	-	-	-	-	-	-	-	-	-	-	-	-	-	-	-	-	-	-	-	-	-	0.159744	-	-	-	-
		....R....				N/A	Ma (42)		-	34.984	-	2.71565	-	1.91693	-	1.11821	-	0.159744	-	0.159744	-	-	-	-	-	0.159744	-	-	-	-	-	0.638978	-	-	-	-	-	-	-	0.159744	-	-	-	-	-	-	-	0.159744
HA	231 - 239	QVNGQSGRI	Q235L	99	628	I (65)	Ma (14)	Reversed	5.06	2.70701	16.17	2.70701	12.13	1.91083	-	0.477707	-	-	1.02	0.159236	1.02	0.159236	2.03	0.796178	1.02	0.159236	10.11	1.59236	3.04	0.477707	4.05	0.796178	2.03	0.318471	2.03	0.477707	1.02	0.159236	-	0.159236	1.02	0.159236	2.03	0.318471	-	-	1.02	0.159236
		....L....				Ma (35)	I (83)		28.29	79.9363	2.03	1.91083	-	-	3.04	0.636943	2.03	0.159236	-	-	-	-	-	-	-	-	-	-	-	-	-	0.318471	-	-	-	-	-	-	-	-	-	-	-	-	-	-	-	-
HA	423 - 431	TRDSMTEVW	#M427I	100	632	I (51)	Ma (9)	Reversed	-	0	16	2.68987	12	1.89873	-	-	-	-	-	-	-	-	3	0.632911	-	-	7	1.10759	3	0.474684	2	0.474684	-	-	2	0.474684	1	0.158228	-	0.158228	1	0.158228	3	0.474684	-	-	1	0.158228
		....I....				Ma (43)	I (84)		33	79.9051	2	2.05696	-	-	3	1.10759	2	0.158228	1	0.158228	1	0.158228	-	-	1	0.158228	-	-	-	-	-	0.316456	-	-	-	-	-	-	-	-	-	-	-	-	-	-	-	-
HA	454 - 462	MNKLYERVR	#N455D, R462K	100	632	I (48)	Ma (8)	Reversed, Reversed	-	0	12	1.89873	10	1.58228	-	-	-	-	-	-	-	-	2	0.791139	-	-	9	1.42405	3	0.474684	2	0.316456	2	0.316456	2	0.474684	1	0.158228	-	-	1	0.158228	3	0.474684	-	-	1	0.158228
		.D......K				Ma (41)	I (87)		32	82.9114	2	2.05696	-	-	3	1.10759	2	0.158228	-	-	1	0.158228	-	-	1	0.158228	-	-	-	-	-	0.316456	-	-	-	-	-	-	-	-	-	-	-	-	-	-	-	-
NP	30 - 38	GRMVGGIGR	G34S	86	520	I (51)	Ma (13)	Reversed	-	3.46154	12.8	2.11538	11.63	1.92308	-	-	-	-	1.17	0.192308	-	-	2.33	0.961538	-	-	4.66	0.769231	3.49	0.576923	3.49	0.769231	1.17	0.192308	3.49	0.769231	1.17	0.192308	-	0.192308	1.17	0.192308	3.49	0.576923	-	-	1.17	0.192308
		....S....				Ma (41)	I (85)		30.24	80.7692	2.33	2.11538	-	-	3.49	1.15385	2.33	0.192308	-	-	1.17	0.192308	-	-	1.17	0.192308	-	-	-	-	-	0.192308	-	-	-	-	-	-	-	-	-	-	-	-	-	-	-	-
NP	48 - 56	KLSDYEGRL	#Y52N	86	520	I (49)	Ma (9)	Reversed	-	0.192308	12.8	2.11538	12.8	2.11538	-	-	-	-	1.17	0.192308	-	-	2.33	0.769231	-	-	4.66	0.769231	2.33	0.384615	3.49	0.769231	1.17	0.192308	3.49	0.769231	-	-	-	0.192308	-	-	3.49	0.576923	-	0.192308	1.17	0.192308
		....N....				Ma (41)	I (88)		30.24	84.0385	2.33	2.11538	-	-	3.49	0.961538	2.33	0.192308	-	-	1.17	0.192308	-	-	1.17	0.192308	-	-	-	-	-	0.192308	-	-	-	-	-	-	-	-	-	-	-	-	-	-	-	-
NP	73 - 81	ERRNKYLEE	K77R	86	520	I (59)	Ma (12)	Reversed	-	0.769231	12.8	2.11538	12.8	2.11538	-	-	-	-	1.17	0.192308	-	-	2.33	0.961538	-	-	11.63	1.92308	3.49	0.576923	3.49	0.769231	1.17	0.192308	3.49	0.769231	1.17	0.192308	-	0.192308	1.17	0.192308	3.49	0.576923	-	0.192308	1.17	0.192308
		....R....				Ma (41)	I (88)		30.24	83.8462	2.33	2.30769	-	-	3.49	1.15385	2.33	0.192308	-	-	1.17	0.192308	-	-	1.17	0.192308	-	-	-	-	-	0.192308	-	-	-	-	-	-	-	-	-	-	-	-	-	-	-	-
NP	182 - 190	AVKGVGTMV	#V186I	86	520	I (58)	Ma (12)	Reversed	-	0.576923	12.8	2.11538	12.8	2.11538	-	-	-	-	1.17	0.192308	-	-	2.33	0.961538	-	-	11.63	1.92308	2.33	0.384615	3.49	0.769231	1.17	0.192308	3.49	0.769231	1.17	0.192308	-	0.192308	1.17	0.192308	3.49	0.576923	-	0.192308	1.17	0.192308
		....I....				Ma (41)	I (85)		30.24	81.1538	2.33	2.30769	-	-	3.49	1.15385	2.33	0.192308	-	-	1.17	0.192308	-	-	1.17	0.192308	-	-	-	-	-	0.192308	-	-	-	-	-	-	-	-	-	-	-	-	-	-	-	-
NP	348 - 356	RGTRVVPRG	#V352M	86	520	I (42)	Ma (8)	Reversed	-	0.192308	12.8	2.11538	3.49	0.576923	-	-	-	-	1.17	0.192308	-	-	2.33	0.961538	-	-	9.31	1.53846	3.49	0.576923	3.49	0.769231	1.17	0.192308	3.49	0.769231	1.17	0.192308	-	-	-	-	-	-	-	0.192308	-	-
		....M....				Ma (40)	I (87)		29.07	83.6538	2.33	2.11538	-	-	3.49	0.769231	2.33	0.192308	-	-	1.17	0.192308	-	-	1.17	0.192308	-	-	-	-	-	-	-	-	-	-	-	-	-	-	-	-	-	-	-	-	-	-
NP	371 - 379	METMDSSTL	T373A, S377N	86	520	I (50)	Mi (10)	Reversed, Reversed	-	0.192308	12.8	2.11538	12.8	2.11538	-	-	-	-	1.17	0.192308	-	-	2.33	0.961538	-	-	4.66	0.769231	1.17	0.192308	3.49	0.769231	1.17	0.192308	3.49	0.769231	1.17	0.192308	-	0.192308	1.17	0.192308	3.49	0.576923	-	0.192308	1.17	0.192308
		..A...N..				Ma (29)	I (45)		19.77	42.1154	2.33	1.73077	-	-	2.33	0.576923	2.33	0.192308	-	-	1.17	0.192308	-	-	1.17	0.192308	-	-	-	-	-	-	-	-	-	-	-	-	-	-	-	-	-	-	-	-	-	-
NP	402 - 410	SAGQISVQP	#I406V	86	520	I (61)	Ma (12)	Reversed	1.17	1.15385	12.8	2.11538	12.8	2.11538	-	-	-	-	1.17	0.192308	-	-	2.33	0.961538	-	-	11.63	1.92308	3.49	0.576923	3.49	0.769231	1.17	0.192308	3.49	0.769231	1.17	0.192308	-	0.192308	1.17	0.192308	3.49	0.576923	-	0.192308	1.17	0.192308
		....V....				Ma (40)	I (76)		29.07	71.5385	2.33	2.11538	-	-	3.49	1.15385	2.33	0.192308	-	-	1.17	0.192308	-	-	1.17	0.192308	-	-	-	-	-	0.192308	-	-	-	-	-	-	-	-	-	-	-	-	-	-	-	-
NP	478 - 486	SFDMSNEGS	S482N	85	518	I (58)	Ma (13)	Reversed	-	2.12355	12.95	2.12355	11.77	1.9305	-	-	-	-	1.18	0.19305	-	-	2.36	0.965251	-	-	11.77	1.9305	3.53	0.579151	3.53	0.772201	1.18	0.19305	3.53	0.772201	1.18	0.19305	-	0.19305	1.18	0.19305	3.53	0.579151	-	0.19305	-	-
		....N....				Ma (41)	I (86)		30.59	82.0463	2.36	2.3166	-	-	3.53	1.1583	2.36	0.19305	-	-	1.18	0.19305	-	-	1.18	0.19305	-	-	-	-	-	0.19305	-	-	-	-	-	-	-	-	-	-	-	-	-	-	-	-
NA	392 - 400	IVLNTDWSG	#T401A	92	620	I (54)	Ma (10)	Reversed	-	0.644122	13.05	2.0934	11.96	1.77134	-	-	-	-	1.09	0.161031	-	-	1.09	0.644122	-	-	10.87	1.61031	3.27	0.483092	3.27	0.644122	2.18	0.322061	2.18	0.483092	1.09	0.161031	-	0.161031	1.09	0.161031	2.18	0.322061	-	0.161031	1.09	0.161031
		....A....				Ma (44)	I (89)		34.79	85.0242	1.09	1.93237	-	-	3.27	1.12721	2.18	0.161031	-	-	1.09	0.161031	-	-	1.09	0.161031	-	-	-	-	-	0.322061	-	-	-	-	-	-	-	-	-	-	-	-	-	-	-	-
M1	11 - 19	VLSIVPSGP	V15I	85	519	I (59)	Ma (11)	Reversed	-	0.191939	12.95	2.11132	12.95	2.11132	-	-	-	-	1.18	0.191939	-	-	1.18	0.767754	-	-	11.77	1.91939	3.53	0.575816	3.53	0.767754	1.18	0.191939	3.53	0.959693	1.18	0.191939	-	0.191939	1.18	0.191939	3.53	0.575816	-	0.191939	1.18	0.191939
		....I....				Ma (41)	I (88)		30.59	83.3013	2.36	2.30326	-	-	3.53	1.34357	2.36	0.191939	-	-	1.18	0.191939	-	-	1.18	0.191939	-	-	-	-	-	0.191939	-	-	-	-	-	-	-	-	-	-	-	-	-	-	-	-
M1	33 - 41	AGKNTDLEA	#T37A	86	522	I (57)	Ma (11)	Reversed	-	0.573614	12.8	2.29446	12.8	2.10325	-	-	-	-	1.17	0.191205	-	-	-	0.382409	-	-	11.63	1.91205	3.49	0.573614	3.49	0.764818	1.17	0.191205	3.49	0.956023	1.17	0.191205	-	0.191205	1.17	0.191205	3.49	0.573614	-	0.191205	1.17	0.191205
		....A....				Ma (41)	I (86)		30.24	82.0268	2.33	2.10325	-	-	3.49	1.33843	2.33	0.191205	-	-	1.17	0.191205	-	-	1.17	0.191205	-	-	-	-	-	0	-	-	-	-	-	-	-	-	-	-	-	-	-	-	-	-
M1	42 - 50	LMEWLKTRP	#L46I	86	523	I (58)	Ma (11)	Reversed	-	0.191205	12.8	2.10325	12.8	2.10325	-	-	-	-	1.17	0.191205	-	-	1.17	0.764818	-	-	11.63	1.91205	3.49	0.573614	3.49	0.764818	1.17	0.191205	3.49	0.956023	1.17	0.191205	-	0.191205	1.17	0.191205	3.49	0.573614	-	0.191205	1.17	0.191205
		....I....				Ma (41)	I (89)		30.24	84.13	2.33	2.29446	-	-	3.49	1.33843	2.33	0.191205	-	-	1.17	0.191205	-	-	1.17	0.191205	-	-	-	-	-	0.191205	-	-	-	-	-	-	-	-	-	-	-	-	-	-	-	-
M1	94 - 102	DRAVKLYRK	#R95K, R101K	86	522	I (59)	Ma (11)	Reversed, Reversed	-	0.191571	12.8	2.10728	13.96	2.29885	-	-	-	-	1.17	0.191571	-	-	1.17	0.766284	-	-	11.63	1.91571	3.49	0.574713	3.49	0.766284	1.17	0.191571	3.49	0.957854	1.17	0.191571	-	0.191571	1.17	0.191571	3.49	0.574713	-	0.191571	1.17	0.191571
		.K.....K.				Ma (31)	I (82)		22.1	78.3525	2.33	2.10728	-	-	2.33	1.14943	2.33	0.191571	-	-	1.17	0.191571	-	-	1.17	0.191571	-	-	-	-	-	0.191571	-	-	-	-	-	-	-	-	-	-	-	-	-	-	-	-
M1	103 - 111	LKREITFHG	I107M	86	522	I (59)	Ma (12)	Reversed	-	0.191571	12.8	2.29885	13.96	2.29885	-	-	-	-	1.17	0.191571	-	-	1.17	0.766284	-	-	11.63	1.91571	3.49	0.574713	3.49	0.766284	1.17	0.191571	3.49	0.957854	1.17	0.191571	-	0.191571	1.17	0.191571	3.49	0.574713	-	0.191571	1.17	0.191571
		....M....				Ma (41)	I (88)		30.24	84.0996	2.33	2.10728	-	-	3.49	1.341	2.33	0.191571	-	-	1.17	0.191571	-	-	1.17	0.191571	-	-	-	-	-	0.191571	-	-	-	-	-	-	-	-	-	-	-	-	-	-	-	-
M1	138 - 146	VTTEVAFGL	#T140A, #V142G, F144L	86	522	I (59)	Ma (11)	Reversed, Reversed, Reversed	-	0.191571	12.8	2.29885	13.96	2.29885	-	-	-	-	1.17	0	-	-	1.17	0.766284	-	-	11.63	1.91571	3.49	0.574713	3.49	0.766284	1.17	0.191571	3.49	0.957854	1.17	0.191571	-	0.191571	1.17	0.191571	3.49	0.574713	-	0.191571	1.17	0.191571
		..A.G.L..				Ma (40)	I (88)		29.07	83.7165	2.33	1.91571	-	-	3.49	1.341	2.33	0.191571	-	-	1.17	0.191571	-	-	1.17	0.191571	-	-	-	-	-	0.191571	-	-	-	-	-	-	-	-	-	-	-	-	-	-	-	-
M1	153 - 161	QIADSQHRS	S157A	86	523	I (59)	Ma (12)	Reversed	-	0.191205	12.8	2.29446	13.96	2.29446	-	-	-	-	1.17	0.191205	-	-	1.17	0.764818	-	-	11.63	1.91205	3.49	0.573614	3.49	0.764818	1.17	0.191205	3.49	0.956023	1.17	0.191205	-	0.191205	1.17	0.191205	3.49	0.573614	-	0.191205	1.17	0.191205
		....A....				Ma (38)	I (88)		27.91	83.7476	2.33	2.10325	-	-	3.49	1.33843	2.33	0.191205	-	-	1.17	0.191205	-	-	1.17	0.191205	-	-	-	-	-	0.191205	-	-	-	-	-	-	-	-	-	-	-	-	-	-	-	-
M1	162 - 170	HRQMVTTTN	V166A	86	522	I (57)	Ma (11)	Reversed	-	0.573614	12.8	2.10325	13.96	2.29446	-	-	-	-	1.17	0.191205	-	-	1.17	0.764818	-	-	9.31	1.52964	3.49	0.573614	3.49	0.764818	1.17	0.191205	3.49	0.956023	1.17	0.191205	-	0.191205	1.17	0.191205	3.49	0.573614	-	0.191205	1.17	0.191205
		....A....				Ma (40)	I (79)		29.07	75.1434	2.33	2.10325	-	-	3.49	1.33843	2.33	0.191205	-	-	1.17	0.191205	-	-	1.17	0.191205	-	-	-	-	-	0.191205	-	-	-	-	-	-	-	-	-	-	-	-	-	-	-	-
M1	219 - 227	IGTHPSSSA	#I219V, #S224N, #A227T	86	523	I (59)	Ma (11)	Reversed, Reversed, Reversed	-	0.191205	12.8	2.10325	13.96	2.29446	-	-	-	-	1.17	0.191205	-	-	1.17	0.764818	-	-	11.63	1.91205	3.49	0.573614	3.49	0.764818	1.17	0.191205	3.49	0.956023	1.17	0.191205	-	0.191205	1.17	0.191205	3.49	0.573614	-	0.191205	1.17	0.191205
		V....N..T				Ma (41)	I (87)		30.24	82.7916	2.33	2.10325	-	-	3.49	1.33843	2.33	0.191205	-	-	1.17	0.191205	-	-	1.17	0.191205	-	-	-	-	-	0.191205	-	-	-	-	-	-	-	-	-	-	-	-	-	-	-	-
M1	230 - 238	KDDLLENLQ	L234I	86	523	I (59)	Ma (11)	Reversed	-	0.191205	12.8	2.10325	13.96	2.29446	-	-	-	-	1.17	0.191205	-	-	1.17	0.764818	-	-	11.63	1.91205	3.49	0.573614	3.49	0.764818	1.17	0.191205	3.49	0.956023	1.17	0.191205	-	0.191205	1.17	0.191205	3.49	0.573614	-	0.191205	1.17	0.191205
		....I....				Ma (40)	I (86)		29.07	82.218	2.33	2.10325	-	-	3.49	1.14723	2.33	0.191205	-	-	1.17	0.191205	-	-	1.17	0.191205	-	-	-	-	-	0.191205	-	-	-	-	-	-	-	-	-	-	-	-	-	-	-	-
M1	241 - 249	QKRMGVQMQ	#K242N, #M248L	86	523	I (59)	Ma (12)	Reversed, Reversed	-	0.191205	12.8	2.29446	13.96	2.29446	-	-	-	-	1.17	0.191205	-	-	1.17	0.764818	-	-	11.63	1.91205	3.49	0.573614	3.49	0.764818	1.17	0.191205	3.49	0.956023	1.17	0.191205	-	0.191205	1.17	0.191205	3.49	0.573614	-	0.191205	1.17	0.191205
		.N.....L.				Ma (40)	I (86)		29.07	82.0268	2.33	1.91205	-	-	3.49	1.33843	2.33	0.191205	-	-	1.17	0.191205	-	-	1.17	0.191205	-	-	-	-	-	0.191205	-	-	-	-	-	-	-	-	-	-	-	-	-	-	-	-
M2	7 - 15	VETPTRNGW	#N13T	83	520	I (53)	Mi (10)	Reversed	-	0.192308	13.26	2.11538	13.26	2.11538	-	-	-	-	1.21	0.192308	-	-	1.21	0.769231	-	-	12.05	1.92308	1.21	0.192308	2.41	0.576923	-	-	1.21	0.769231	1.21	0.192308	-	0.192308	1.21	0.192308	3.62	0.576923	-	0.192308	1.21	0.192308
		......T..				Ma (31)	I (51)		25.31	49.2308	2.41	0.769231	-	-	2.41	0.769231	-	-	-	-	1.21	0.192308	-	-	-	-	-	-	-	-	-	-	-	-	-	-	-	-	-	-	-	-	-	-	-	-	-	-
M2	17 - 25	CKCSDSSDP	#K18N, D24E	84	522	I (39)	Mi (8)	Reversed, Reversed	-	0.191571	13.1	2.10728	4.77	0.766284	-	-	-	-	1.2	0.191571	-	-	1.2	0.766284	-	-	11.91	1.91571	-	-	3.58	0.766284	1.2	0.191571	1.2	0.191571	1.2	0.191571	-	0.191571	-	-	-	-	-	0.191571	-	-
		.N..G..E.				Ma (29)	I (46)		22.62	44.2529	2.39	0.766284	-	-	2.39	0.766284	-	-	-	-	1.2	0.191571	-	-	-	-	-	-	-	-	-	-	-	-	-	-	-	-	-	-	-	-	-	-	-	-	-	-
M2	25 - 33	PLVIAASII	I28V, #S31N	84	522	I (42)	Ma (9)	Reversed, Reversed	-	0.191571	13.1	2.10728	4.77	0.766284	-	-	-	-	1.2	0.191571	-	-	1.2	0.766284	-	-	11.91	1.91571	3.58	0.574713	2.39	0.574713	-	-	1.2	0.766284	1.2	0.191571	-	0.191571	1.2	0.191571	-	-	-	0.191571	-	-
		...V..N..				Ma (41)	I (80)		29.77	76.0536	2.39	2.10728	-	-	3.58	1.14943	2.39	0.191571	-	-	1.2	0.191571	-	-	1.2	0.191571	-	-	-	-	-	0.191571	-	-	-	-	-	-	-	-	-	-	-	-	-	-	-	-
M2	51 - 59	IYRRLKYGL	L55F	84	522	I (54)	Ma (11)	Reversed	-	1.14943	13.1	2.10728	11.91	1.91571	-	-	-	-	1.2	0.191571	-	-	1.2	0.766284	-	-	11.91	1.91571	3.58	0.574713	1.2	0.191571	1.2	0.191571	1.2	0.766284	1.2	0.191571	-	0.191571	1.2	0.191571	3.58	0.574713	-	0.191571	1.2	0.191571
		....F....				Ma (43)	I (87)		29.77	82.3755	2.39	2.10728	-	-	3.58	1.341	2.39	0.191571	-	-	1.2	0.191571	-	-	1.2	0.191571	-	-	-	-	2.39	0.766284	-	-	-	-	-	-	-	-	-	-	-	-	-	-	-	-
M2	64 - 72	STEGVPESM	#V68M	84	521	I (58)	Ma (12)	Reversed	-	0.575816	13.1	2.30326	14.29	2.30326	-	-	-	-	1.2	0.191939	-	-	1.2	0.767754	-	-	11.91	1.91939	3.58	0.575816	3.58	0.767754	1.2	0.191939	1.2	0.383877	1.2	0.191939	-	0.191939	1.2	0.191939	3.58	0.575816	-	0.191939	1.2	0.191939
		....M....				Ma (41)	I (87)		30.96	83.3013	1.2	1.91939	-	-	3.58	1.34357	2.39	0.191939	-	-	1.2	0.191939	-	-	1.2	0.191939	-	-	-	-	-	0.191939	-	-	-	-	-	-	-	-	-	-	-	-	-	-	-	-
M2	78 - 86	QEQQSAVDV	S82N	84	521	I (55)	Ma (11)	Reversed	-	0.383877	13.1	2.11132	13.1	2.11132	-	-	-	-	1.2	0.191939	-	-	1.2	0.767754	-	-	9.53	1.53551	3.58	0.575816	3.58	0.767754	1.2	0.191939	1.2	0.767754	1.2	0.191939	-	0.191939	1.2	0.191939	3.58	0.575816	-	0.191939	1.2	0.191939
		....N....				Ma (45)	I (88)		30.96	83.3013	2.39	2.30326	1.2	0.191939	3.58	1.34357	2.39	0.191939	-	-	1.2	0.191939	-	-	1.2	0.191939	2.39	0.383877	-	-	-	0.191939	-	-	-	-	-	-	-	-	-	-	-	-	-	-	-	-
M2	89 - 97	GHFVNIELE	E97K	82	502	I (56)	Ma (13)	Reversed	1.22	1.59363	12.2	2.39044	13.42	2.19124	-	0.398406	-	-	1.22	0.199203	-	-	1.22	0.796813	-	-	12.2	1.99203	3.66	0.59761	1.22	0.199203	1.22	0.199203	1.22	0.59761	1.22	0.199203	-	0.199203	1.22	0.199203	3.66	0.59761	-	0.199203	1.22	0.199203
		........K				Ma (41)	I (85)		30.49	81.2749	2.44	1.99203	-	-	3.66	0.996016	2.44	0.199203	-	-	1.22	0.199203	-	-	1.22	0.199203	-	-	-	-	-	0.199203	-	-	-	-	-	-	-	-	-	-	-	-	-	-	-	-
NS1	23 - 31	ADQELGDAP	L27M	87	536	I (58)	I (51)	Unchanged	1.15	40.2985	12.65	2.23881	13.8	2.23881	-	0.373134	-	-	1.15	0.186567	-	-	1.15	0.559701	-	-	11.5	1.86567	3.45	0.559701	3.45	0.932836	1.15	0.186567	3.45	0.932836	1.15	0.186567	-	0.186567	-	-	2.3	0.373134	-	0.186567	1.15	0.186567
		....M....				Ma (36)	Ma (25)		25.29	21.4552	2.3	2.23881	-	-	3.45	0.932836	2.3	0.186567	-	-	1.15	0.186567	-	-	1.15	0.186567	-	-	-	-	-	-	-	-	-	-	-	-	-	-	-	-	-	-	-	-	-	-
NS1	47 - 55	GSTLGLDIE	#G47S, E55R	87	536	I (55)	Ma (10)	Reversed, Reversed	-	0.186567	12.65	2.05224	12.65	2.05224	-	-	-	-	1.15	0.186567	-	-	1.15	0.559701	-	-	11.5	1.86567	3.45	0.559701	3.45	0.746269	1.15	0.186567	3.45	0.932836	1.15	0.186567	-	0.186567	-	-	2.3	0.373134	-	0.186567	1.15	0.186567
		S.......R				Ma (41)	I (88)		31.04	83.209	2.3	2.42537	-	-	3.45	1.30597	2.3	0.186567	-	-	1.15	0.186567	-	-	1.15	0.186567	-	-	-	-	-	0.186567	-	-	-	-	-	-	-	-	-	-	-	-	-	-	-	-
NS1	56 - 64	TATRAGKQI	A60E, Q63H	87	533	I (53)	Ma (10)	Reversed, Reversed	-	0.187266	12.65	2.05993	11.5	1.87266	-	-	-	-	1.15	0.187266	-	-	1.15	0.561798	-	-	11.5	1.87266	3.45	0.561798	3.45	0.749064	1.15	0.187266	2.3	0.749064	1.15	0.187266	-	0.187266	-	-	2.3	0.374532	-	0.187266	1.15	0.187266
		....E..H.				Ma (41)	I (83)		31.04	79.0262	2.3	2.24719	-	-	3.45	0.93633	2.3	0.187266	-	-	1.15	0.187266	-	-	1.15	0.187266	-	-	-	-	-	-	-	-	-	-	-	-	-	-	-	-	-	-	-	-	-	-
NS1	74 - 82	DEALKMTIA	#L77F, #T80S	86	535	I (57)	Ma (11)	Reversed, Reversed	-	0.186916	12.8	2.05607	13.96	2.24299	-	-	-	-	1.17	0.186916	-	-	1.17	0.560748	-	-	11.63	1.86916	3.49	0.560748	3.49	0.747664	1.17	0.186916	3.49	0.934579	1.17	0.186916	-	0.186916	-	-	2.33	0.373832	-	0.186916	1.17	0.186916
		...F..S..				Ma (40)	I (48)		29.07	43.9252	2.33	2.42991	-	-	3.49	0.934579	2.33	0.186916	-	-	1.17	0.186916	-	-	1.17	0.186916	-	-	-	-	-	-	-	-	-	-	-	-	-	-	-	-	-	-	-	-	-	-
NS1	83 - 91	SVPASRYLT	S87P	87	533	I (53)	Ma (10)	Reversed	-	0.186567	12.65	2.05224	13.8	2.23881	-	-	-	-	1.15	0.186567	-	-	1.15	0.559701	-	-	11.5	1.86567	3.45	0.559701	2.3	0.559701	1.15	0.186567	1.15	0.186567	1.15	0.186567	-	0.186567	-	-	2.3	0.373134	-	0.186567	1.15	0.186567
		....P....				Ma (40)	I (79)		29.89	74.8134	2.3	2.42537	-	-	3.45	0.932836	2.3	0.186567	-	-	1.15	0.186567	-	-	1.15	0.186567	-	-	-	-	-	-	-	-	-	-	-	-	-	-	-	-	-	-	-	-	-	-
NS1	100 - 108	RDWFMLMPK	F103L, M106I	87	536	I (56)	Ma (11)	Reversed, Reversed	-	0.186567	12.65	2.23881	13.8	2.23881	-	-	-	-	1.15	0.186567	-	-	1.15	0.559701	-	-	11.5	1.86567	3.45	0.559701	3.45	0.746269	1.15	0.186567	3.45	0.932836	1.15	0.186567	-	0.186567	-	-	2.3	0.373134	-	0.186567	1.15	0.186567
		...L..I..				Ma (41)	I (88)		31.04	83.9552	2.3	2.42537	-	-	3.45	1.30597	2.3	0.186567	-	-	1.15	0.186567	-	-	1.15	0.186567	-	-	-	-	-	0.186567	-	-	-	-	-	-	-	-	-	-	-	-	-	-	-	-
NS1	107 - 115	PKQKVAGSL	V111I, A112T	87	536	I (56)	Ma (11)	Reversed, Reversed	-	0.373134	12.65	2.05224	13.8	2.23881	-	-	-	-	1.15	0.186567	-	-	1.15	0.559701	-	-	11.5	1.86567	3.45	0.559701	3.45	0.746269	1.15	0.186567	3.45	0.932836	1.15	0.186567	-	0.186567	-	-	2.3	0.373134	-	0.186567	1.15	0.186567
		....IT...				Ma (41)	I (46)		31.04	42.5373	2.3	2.23881	-	-	3.45	0.932836	2.3	0.186567	-	-	1.15	0.186567	-	-	1.15	0.186567	-	-	-	-	-	-	-	-	-	-	-	-	-	-	-	-	-	-	-	-	-	-
NS1	122 - 130	AIMDKNIIL	M124V, I129T	87	536	I (44)	Ma (9)	Reversed, Reversed	-	0.186567	-	-	13.8	2.23881	-	-	-	-	1.15	0.186567	-	-	1.15	0.559701	-	-	11.5	1.86567	3.45	0.559701	3.45	0.746269	1.15	0.186567	3.45	0.932836	1.15	0.186567	-	0.186567	-	-	2.3	0.373134	-	0.186567	1.15	0.186567
		..V....T.				Ma (40)	I (82)		29.89	78.5448	2.3	1.86567	-	-	3.45	0.932836	2.3	0.186567	-	-	1.15	0.186567	-	-	1.15	0.186567	-	-	-	-	-	-	-	-	-	-	-	-	-	-	-	-	-	-	-	-	-	-
NS1	137 - 145	IFDRLETLI	D139N, T143A	87	536	I (55)	Ma (10)	Reversed, Reversed	-	0.186567	12.65	2.05224	12.65	2.05224	-	-	-	-	1.15	0.186567	-	-	1.15	0.559701	-	-	11.5	1.86567	3.45	0.559701	3.45	0.746269	1.15	0.186567	3.45	0.932836	1.15	0.186567	-	0.186567	-	-	2.3	0.373134	-	0.186567	1.15	0.186567
		..N...A..				Ma (40)	I (83)		29.89	79.1045	2.3	2.42537	-	-	3.45	1.1194	2.3	0.186567	-	-	1.15	0.186567	-	-	1.15	0.186567	-	-	-	-	-	0.186567	-	-	-	-	-	-	-	-	-	-	-	-	-	-	-	-
NS1	168 - 176	GHTDEDVKN	E172K	87	536	I (55)	Ma (10)	Reversed	-	0.186567	12.65	2.05224	13.8	2.23881	-	-	-	-	1.15	0.186567	-	-	1.15	0.559701	-	-	10.35	1.6791	3.45	0.559701	3.45	0.746269	1.15	0.186567	3.45	0.932836	1.15	0.186567	-	0.186567	-	-	2.3	0.373134	-	0.186567	1.15	0.186567
		....K....				Ma (43)	I (88)		31.04	83.5821	2.3	2.23881	-	-	3.45	1.30597	2.3	0.186567	-	-	1.15	0.186567	-	-	1.15	0.186567	1.15	0.186567	-	-	-	0.186567	-	-	-	-	-	-	-	-	-	-	-	-	-	-	-	-
NS1	178 - 186	IGVLIGGLE	G179E, V180I, L185F	87	534	I (55)	Ma (11)	Reversed, Reversed, Reversed	-	0.187266	12.65	2.24719	13.8	2.24719	-	-	-	-	1.15	0.187266	-	-	1.15	0.561798	-	-	11.5	1.87266	2.3	0.374532	3.45	0.749064	1.15	0.187266	3.45	0.93633	1.15	0.187266	-	0.187266	-	-	2.3	0.374532	-	0.187266	1.15	0.187266
		.EI....F.				Ma (40)	I (83)		29.89	79.0262	2.3	2.24719	-	-	3.45	0.93633	2.3	0.187266	-	-	1.15	0.187266	-	-	1.15	0.187266	-	-	-	-	-	-	-	-	-	-	-	-	-	-	-	-	-	-	-	-	-	-
NS1	203 - 211	WRSSNEDGR	N207D	87	536	I (48)	Ma (20)	Reversed	-	11.3806	12.65	2.05224	13.8	2.23881	-	-	-	-	1.15	0.186567	-	-	1.15	0.373134	-	-	9.2	1.49254	2.3	0.373134	2.3	0.559701	-	-	1.15	0.186567	1.15	0.186567	-	0.186567	-	-	2.3	0.373134	-	0.186567	1.15	0.186567
		....D....				Ma (39)	I (61)		28.74	57.6493	2.3	2.23881	-	-	3.45	0.932836	2.3	0.186567	-	-	1.15	0.186567	-	-	1.15	0.186567	-	-	-	-	-	-	-	-	-	-	-	-	-	-	-	-	-	-	-	-	-	-
NS1	208 - 216	EDGRPPLPP	P212S, P215S, #P216T	87	533	I (56)	Mi (11)	Reversed, Reversed, Reversed	-	0.375235	12.65	2.06379	13.8	2.25141	-	-	-	-	1.15	0.187617	-	-	1.15	0.562852	-	-	11.5	1.87617	3.45	0.562852	3.45	0.750469	1.15	0.187617	3.45	0.938086	1.15	0.187617	-	0.187617	-	-	2.3	0.375235	-	0.187617	1.15	0.187617
		....S..ST				Ma (37)	I (42)		27.59	39.212	1.15	1.68856	-	-	3.45	0.938086	2.3	0.187617	-	-	1.15	0.187617	-	-	1.15	0.187617	-	-	-	-	-	-	-	-	-	-	-	-	-	-	-	-	-	-	-	-	-	-
NS2	14 - 22	MRMSKMQLG	#M14T, G22R	85	534	I (54)	Ma (10)	Reversed, Reversed	-	0.187266	12.95	2	14.12	2.24719	-	-	-	-	1.18	0.187266	-	-	1.18	0.561798	-	-	10.59	1.68539	3.53	0.561798	3.53	0.749064	1.18	0.187266	1.18	0.749064	1.18	0.187266	-	0.187266	-	-	2.36	0.374532	-	0.187266	1.18	0.187266
		T.......R				Ma (42)	I (82)		31.77	78.4644	2.36	2.24719	-	-	3.53	0.93633	2.36	0.187266	-	-	1.18	0.187266	-	-	1.18	0.187266	-	-	-	-	-	-	-	-	-	-	-	-	-	-	-	-	-	-	-	-	-	-
NS2	45 - 53	LGEAVMRMG	V49A	85	535	I (55)	Ma (11)	Reversed	-	0.186916	12.95	2.24299	14.12	2.24299	-	-	-	-	1.18	0.186916	-	-	1.18	0.560748	-	-	11.77	1.86916	3.53	0.560748	3.53	0.747664	1.18	0.186916	1.18	0.747664	1.18	0.186916	-	0.186916	-	-	2.36	0.373832	-	0.186916	1.18	0.186916
		....A....				Ma (40)	I (79)		29.42	74.5794	2.36	2.42991	-	-	3.53	1.30841	2.36	0.186916	-	-	1.18	0.186916	-	-	1.18	0.186916	-	-	-	-	-	0.186916	-	-	-	-	-	-	-	-	-	-	-	-	-	-	-	-
a The HA protein sequence numeration is based on the H7N9 HA protein sequence alignment for consistency with other proteins. However, the literature generally uses H7 numeration without the 18 amino acids of the signal peptide. Thus, in order to correspond our position numbers to H7 numeration, 18aa of the signal peptide needs to be subtracted. Additionally, the nonamer sequences provided would h…

## Sheet: SupTable3C
Supplementary Table 3C | Substitution identified in the human H7N9 virus sequences from 2014 and 2017 datasets.
Proteina	Positionb	Nonamer sequence (Avian & Human) c	Amino acid substitutiond	Human virus sequencese
				Number of sequences (#) f		Motif (incidence, %) g		Net motif change for each substitution between 2014 and 2017 datasetsh	Geographical area (%)
									China		Hong Kong		Taiwan		Environment		British Columbia		Malaysia
				2014	2017	2014	2017		2014	2017	2014	2017	2014	2017	2014	2017	2014	2017	2014	2017
PB2	187 - 195	KEKKEELQD	E191K	41	796	Ma (12)	I (52)	Reversed	9.76	49	2.44	2	-	1	-	0	-	0	-	-	12.2	52
		....K....				I (85)	Ma (44)		80.52	44	-	0	4.88	0	-	0	-	-	-	-	85.4	44
PB2	288 - 296	QIGGIRMVD	#I292V	43	798	Ma (5)	Ma (4)	Unchanged	2.33	3	2.33	1	-	-	-	-	-	-	-	-	4.66	4
		....V....				I (95)	I (96)		90.76	93	-	2	4.66	1	-	0	-	0	-	-	95.42	96
PB2	385 - 393	IVSGRDEQS	#R389K	41	799	X (0)	X (0)	Unchanged	-	-	-	-	-	-	-	-	-	-	-	-	0	0
		....K....				I (100)	I (100)		92.72	96	2.44	3	4.88	1	-	0	-	0	-	-	100.04	100
PB2	555 - 563	RNWETVKIQ	T559N	41	796	Ma (20)	I (54)	Reversed	17.08	51	2.44	2	-	1	-	0	-	0	-	-	19.52	54
		....N....				I (81)	Ma (44)		75.64	44	-	-	4.88	0	-	0	-	-	-	-	80.52	44
PB2	566 - 574	QDPTILYNK	I570M	-	797	N/A	Ma (34)	New	-	32	-	1	-	1	-	0	-	-	-	-	0	34
		....M....				N/A	I (62)		-	61	-	1	-	0	-	0	-	0	-	-	0	62
PB2	644 - 652	GMRILVRGN	#L648V	41	799	X (0)	X (0)	Unchanged	-	-	-	-	-	-	-	-	-	-	-	-	0	0
		....V....				I (100)	I (75)		92.72	73	2.44	2	4.88	0	-	0	-	0	-	-	100.04	75
PB2	672 - 680	AGALTEDPD	#T676M	41	801	X (0)	X (0)	Unchanged	-	-	-	-	-	-	-	-	-	-	-	-	0	0
		....M....				I (89)	I (73)		82.96	71	-	1	5.89	1	-	0	-	0	-	-	88.85	73
PB1	10 - 18	LKVPAQNAI	#A14V	34	782	X (0)	Ma (3)	Unchanged	-	3.18878	-	-	-	-	-	-	-	-	-	-	0	3.18878
		....V....				I (100)	I (97)		91.28	93	2.95	2.42347	5.56	1.14796	-	0.255102	-	0.127551	-	-	99.79	96.9541
PB1	44 - 52	NRTHQYSEK	#Q48K	36	790	X (0)	X (0)	Unchanged	-	-	-	-	-	-	-	-	-	-	-	-	0	0
		....K....				I (97)	I (97)		88.95	92.4051	2.78	2.53165	5.56	1.13924	-	0.253165	-	0.126582	-	-	97.29	96.4557
PB1	109 - 117	ETMEVVQQT	V113I	36	792	X (0)	U (0)	Unchanged	-	0.126263	-	-	-	-	-	-	-	-	-	-	0	0.126263
		....I....				I (100)	I (99)		91.73	94.8232	2.78	2.52525	5.56	1.13636	-	0.252525	-	0.126263	-	-	100.07	98.8636
PB1	168 - 176	KDVMESMDK	#E172D	36	793	X (0)	X (0)	Unchanged	-	-	-	-	-	-	-	-	-	-	-	-	0	0
		....D....				I (86)	I (81)		77.83	77.8058	2.78	1.26103	5.56	1.13493	-	0.252207	-	0.126103	-	-	86.17	80.5801
PB1	253 - 261	YFVETLARS	#T257A	36	789	X (0)	Mi (0)	Unchanged	-	0.378788	-	-	-	-	-	-	-	-	-	-	0	0.378788
		....A....				I (100)	I (99)		91.73	94.9495	2.78	2.52525	5.56	1.13636	-	0.252525	-	0.126263	-	-	100.07	98.9899
PB1	364 - 372	LRTQIPAEM	#I368V	36	791	Ma (17)	Mi (2)	Unchanged	16.68	2.01765	-	-	-	-	-	0.126103	-	-	-	-	16.68	2.14376
		....V....				I (83)	I (86)		75.06	83.4805	2.78	1.63934	5.56	0.630517	-	-	-	0.126103	-	-	83.4	85.8764
PB1	381 - 389	FNESTRKKI	#E383K, #K387E	36	791	X (0)	X (0)	Unchanged, Unchanged	-	-	-	-	-	-	-	-	-	-	-	-	0	0
		..K...E..				I (100)	I (98)		91.73	94.7103	2.78	2.39295	5.56	1.00756	-	0.251889	-	0.125945	-	-	100.07	98.4887
PB1	423 - 431	ILNLGQKRY	#R430K	36	794	X (0)	Mi (0)	Unchanged	-	0.251889	-	-	-	-	-	-	-	-	-	-	0	0.251889
		.......K.				I (100)	I (99)		91.73	95.466	2.78	2.51889	5.56	1.1335	-	0.251889	-	0.125945	-	-	100.07	99.4962
PB1	521 - 529	ADMSIGVTV	I525V	36	792	Ma (25)	Ma (34)	Unchanged	22.24	31.6919	2.78	2.0202	-	0.126263	-	-	-	-	-	-	25.02	33.8384
		....V....				I (75)	I (66)		69.49	63.8889	-	0.505051	5.56	1.0101	-	0.252525	-	0.126263	-	-	75.05	65.7828
PB1	569 - 577	QTRRSFELK	#S573A	36	789	X (0)	U (0)	Unchanged	-	0.126263	-	-	-	-	-	-	-	-	-	-	0	0.126263
		....A....				I (95)	I (98)		91.73	94	2.78	2.52525	-	1.13636	-	0.252525	-	0.126263	-	-	94.51	98.0404
PB1	624 - 632	LCNPLNPFV	#L628M	36	794	X (0)	X (0)	Unchanged	-	-	-	-	-	-	-	-	-	-	-	-	0	0
		....M....				I (100)	I (99)		91.73	95.5975	2.78	2.51572	5.56	0.754717	-	0.251572	-	0.125786	-	-	100.07	99.2453
PB1	634 - 642	HKEIESVNN	#E638D	36	793	X (0)	X (0)	Unchanged	-	-	-	-	-	-	-	-	-	-	-	-	0	0
		....D....				I (83)	I (92)		75.06	88.5535	2.78	2.38994	5.56	1.00629	-	0.125786	-	0.125786	-	-	83.4	92.2013
PA	33 - 41	NKFAAICTH	#A37S	36	798	X (0)	X (0)	Unchanged	-	-	-	-	-	-	-	-	-	-	-	-	0	0
		....S....				I (100)	I (98)		91.73	94	2.78	2.53807	5.56	1.14213	-	0.253807	-	0.126904	-	-	100.07	98.0609
PA	58 - 66	GESIIVESG	#I61T, #V63I	36	798	X (0)	X (0)	Unchanged, Unchanged	-	-	-	-	-	-	-	-	-	-	-	-	0	0
		...T.I...				I (100)	I (98)		91.73	94.9875	2.78	2.50627	5.56	0.626566	-	0.250627	-	0.125313	-	-	100.07	98.4962
PA	92 - 100	NSICNTTGV	V100A	36	797	Mi (8)	Ma (18)	Unchanged	5.56	16.5414	2.78	1.25313	-	0.125313	-	0.125313	-	0.125313	-	-	8.34	18.1704
		........A				I (83)	I (69)		77.83	67.4185	-	0.37594	5.56	1.00251	-	0.125313	-	-	-	-	83.39	68.9223
PA	257 - 265	IEPFLKTTP	#K262R	36	795	X (0)	Ma (13)	Unchanged	-	11.9347	-	1.00503	-	0.125628	-	-	-	0.125628	-	-	0	13.191
		.....R...				I (97)	I (84)		88.96	81.7839	2.78	1.50754	5.56	0.879397	-	0.125628	-	-	-	-	97.3	84.2965
PA	333 - 341	NYLLAWKQV	#A337T	36	793	X (0)	U (0)	Unchanged	-	0.125628	-	-	-	-	-	-	-	-	-	-	0	0.125628
		....T....				I (89)	I (92)		83.39	88.8191	-	1.50754	5.56	1.13065	-	0.251256	-	0.125628	-	-	88.95	91.8342
PA	352 - 360	EKIPKTKNM	#K356R	36	794	Ma (11)	Mi (7)	Unchanged	8.34	6.28141	2.78	1.00503	-	-	-	-	-	-	-	-	11.12	7.28643
		....R....				I (89)	I (90)		83.39	86.809	-	1.50754	5.56	1.13065	-	0.125628	-	0.125628	-	-	88.95	89.6985
PA	387 - 395	VSDLRQYDS	#S388N, D394N	36	785	X (0)	X (0)	Reversed, Unchanged	-	-	-	-	-	-	-	-	-	-	-	-	0	0
		.N..K..N.				I (83)	I (67)		77.83	66	-	0.251256	5.56	1.00503	-	0.125628	-	-	-	-	83.39	67.3819
PA	407 - 415	IQSEFNKAC	#S409N	36	786	Ma (6)	Mi (4)	Unchanged	5.56	3.39196	-	-	-	0.502513	-	0.125628	-	-	-	-	5.56	4.0201
		..N......				I (95)	I (96)		86.17	93	2.78	2.38693	5.56	0.628141	-	0.125628	-	0.125628	-	-	94.51	96.2663
PA	419 - 427	DSSWIELDE	#I423V	36	786	X (0)	Mi (0)	Unchanged	-	0.381679	-	-	-	-	-	-	-	-	-	-	0	0.381679
		....V....				I (95)	I (99)		91.73	95.1654	2.78	2.54453	-	1.14504	-	0.254453	-	0.127226	-	-	94.51	99.2366
PA	550 - 558	LRTAIGQVS	#I554V	36	784	X (0)	Mi (1)	Unchanged	-	1.01523	-	-	-	-	-	-	-	-	-	-	0	1.01523
		....V....				I (100)	I (97)		91.73	94	2.78	2.28426	5.56	0.761421	-	0.253807	-	0.126904	-	-	100.07	97.4264
PA	603 - 611	KEKDMTKEF	#M607L	36	787	X (0)	U (0)	Unchanged	-	0.126904	-	-	-	-	-	-	-	-	-	-	0	0.126904
		....L....				I (100)	I (98)		91.73	94	2.78	2.53807	5.56	1.01523	-	0.126904	-	0.126904	-	-	100.07	97.8071
PA	680 - 688	TFDLGGLYE	#G684E	36	788	X (0)	Ma (5)	Unchanged	-	4.31472	-	0.253807	-	0.126904	-	-	-	-	-	-	0	4.69543
		....E....				I (100)	I (94)		91.73	90.2284	2.78	2.15736	5.56	1.01523	-	0.253807	-	0.126904	-	-	100.07	93.7817
PA	708 - 716	NSFLTHALK	K716R	36	787	U (3)	Mi (1)	Unchanged	2.78	0.508259	-	0.127065	-	-	-	-	-	-	-	-	2.78	0.635324
		........R				I (95)	I (97)		86.17	93.7738	2.78	2.41423	5.56	0.762389	-	0.25413	-	0.127065	-	-	94.51	97.3316
PA_X	33 - 41	NKFAAICTH	A37S	36	90	X (0)	X (0)	Unchanged	-	-	-	-	-	-	-	-	-	-	-	-	0	0
		....S....				I (100)	I (99)		91.73	93.3333	2.78	1.11111	5.56	4.44444	-	-	-	-	-	-	100.07	98.8889
PA_X	58 - 66	GESIIVESG	I61T, V63I	36	90	X (0)	X (0)	Unchanged, Unchanged	-	-	-	-	-	-	-	-	-	-	-	-	0	0
		...T.I...				I (100)	I (98)		91.73	94.4444	2.78	1.11111	5.56	2.22222	-	-	-	-	-	-	100.07	97.7778
PA_X	92 - 100	NSICNTTGV	V100A	36	90	Mi (8)	Ma (12)	Unchanged	5.56	11.1111	2.78	1.11111	-	-	-	-	-	-	-	-	8.34	12.2222
		........A				I (83)	I (76)		77.83	71.1111	-	-	5.56	4.44444	-	-	-	-	-	-	83.39	75.5556
PA_X	192 - 200	VSPREAKRQ	P194L, R195K, R199K	36	90	X (0)	X (0)	Unchanged, Reversed, Reversed	-	-	-	-	-	-	-	-	-	-	-	-	0	0
		..LK...K.				I (89)	I (67)		83.39	64.4444	-	-	5.72	2.22222	-	-	-	-	-	-	89.11	66.6667
PA_X	243 - 251	RASFLKCQK	K248R	35	89	Ma (17)	Ma (25)	Unchanged	14.3	23.5955	2.86	1.1236	-	-	-	-	-	-	-	-	17.16	24.7191
		.....R...				I (82)	I (74)		77.2	69.6629	-	-	4.45	4.49438	-	-	-	-	-	-	81.65	74.1573
HA	61 - 69	SKGKKTVDL	K65R	-	814	N/A	Ma (24)	New	-	22.9448	-	1.10429	-	-	-	-	-	-	-	0.122699	0	24.1718
		....R....				N/A	I (72)		-	69.2025	-	1.34969	-	1.10429	-	0.122699	-	0.122699	-	-	0	71.9018
HA	231 - 239	QVNGQSGRI	Q235L	45	809	X (0)	Ma (2)	Unchanged	-	1.84275	-	-	-	0.12285	-	-	-	-	-	-	0	1.9656
		....L....				I (95)	I (93)		88.98	89.5577	2.23	2.457	3.78	0.859951	-	0.2457	-	0.12285	-	0.12285	94.99	93.3661
HA	423 - 431	TRDSMTEVW	#M427I	53	822	X (0)	X (0)	Unchanged	-	-	-	-	-	-	-	-	-	-	-	-	0	0
		....I....				I (100)	I (96)		94.42	92	1.89	2.43013	3.78	1.09356	-	0.243013	-	0.121507	-	0.121507	100.09	96.0097
HA	454 - 462	MNKLYERVR	#N455D, R462K	53	822	X (0)	X (0)	Unchanged, Unchanged	-	-	-	-	-	-	-	-	-	-	-	-	0	0
		.D......K				I (100)^	I (99)		94.42	95.2612	1.89	2.43013	5.56	1.09356	-	0.243013	-	0.121507	-	0.121507	101.87	99.271
NP	30 - 38	GRMVGGIGR	G34S	36	783	X (0)	Mi (0)	Unchanged	-	0.381679	-	-	-	-	-	-	-	-	-	-	0	0.381679
		....S....				I (100)	I (98)		91.72	94.402	2.78	2.54453	5.41	1.14504	-	0.254453	-	0.127226	-	-	99.91	98.4733
NP	48 - 56	KLSDYEGRL	#Y52N	37	796	X (0)	X (0)	Unchanged	-	-	-	-	-	-	-	-	-	-	-	-	0	0
		....N....				I (100)	I (96)		91.98	92.0854	2.71	2.38693	5.41	1.13065	-	0.251256	-	0.125628	-	-	100.1	95.9799
NP	73 - 81	ERRNKYLEE	K77R	37	797	X (0)	Ma (1)	Unchanged	-	0.376412	-	0.376412	-	-	-	-	-	-	-	-	0	0.752823
		....R....				I (100)	I (99)		91.98	95.4831	2.71	2.133	5.41	1.12923	-	0.250941	-	0.125471	-	-	100.1	99.1217
NP	182 - 190	AVKGVGTMV	#V186I	37	795	X (0)	X (0)	Unchanged	-	-	-	-	-	-	-	-	-	-	-	-	0	0
		....I....				I (97)	I (98)		89.28	93.7265	2.71	2.38394	5.41	1.12923	-	0.250941	-	0.125471	-	-	97.4	97.6161
NP	348 - 356	RGTRVVPRG	#V352M	37	793	X (0)	X (0)	Unchanged	-	-	-	-	-	-	-	-	-	-	-	-	0	0
		....M....				I (84)	I (91)		75.76	87.2636	2.71	2.52207	5.41	1.13493	-	0.252207	-	0.126103	-	-	83.88	91.2989
NP	371 - 379	METMDSSTL	T373A, S377N	37	797	X (0)	X (0)	Unchanged, Unchanged	-	-	-	-	-	-	-	-	-	-	-	-	0	0
		..A...N..				I (70)	I (79)		62.23	75.9097	2.71	1.38018	5.41	1.12923	-	0.250941	-	0.125471	-	-	70.35	78.7955
NP	402 - 410	SAGQISVQP	#I406V	37	798	X (0)	Ma (5)	Unchanged	-	4.7619	-	0.250627	-	-	-	-	-	-	-	-	0	5.01253
		....V....				I (100)	I (92)		91.98	88.2206	2.71	2.00501	5.41	1.12782	-	0.250627	-	0.125313	-	-	100.1	91.7293
NP	478 - 486	SFDMSNEGS	S482N	37	779	U (3)	Ma (10)	Unchanged	-	9.37099	2.71	0.770218	-	-	-	-	-	-	-	-	2.71	10.1412
		....N....				I (96)	I (89)		91.98	86.2644	-	1.66881	4.26	1.15533	-	0.256739	-	0.12837	-	-	96.24	89.4737
NA	392 - 400	IVLNTDWSG	#T401A	47	814	X (0)	Ma (1)	Unchanged	-	0.859951	-	0.12285	-	-	-	-	-	-	-	-	0	0.982801
		....A....				I (100)^	I (97)		93.67	92.7518	2.13	2.33415	5.27	1.10565	-	0.12285	-	0.12285	-	0.12285	101.07	96.5602
M1	11 - 19	VLSIVPSGP	V15I	38	795	X (0)	X (0)	Unchanged	-	-	-	-	-	-	-	-	-	-	-	-	0	0
		....I....				I (100)	I (100)		92.19	95.9748	2.64	2.51572	5.27	1.13208	-	0.251572	-	0.125786	-	-	100.1	100
M1	33 - 41	AGKNTDLEA	#T37A	38	808	X (0)	Mi (0)	Unchanged	-	0.123609	-	0.123609	-	-	-	-	-	-	-	-	0	0.247219
		....A....				I (100)	I (98)		92.19	93.9431	2.64	2.34858	5.27	1.11248	-	0.247219	-	0.123609	-	-	100.1	97.775
M1	42 - 50	LMEWLKTRP	#L46I	38	809	X (0)	U (0)	Unchanged	-	0.123609	-	-	-	-	-	-	-	-	-	-	0	0.123609
		....I....				I (100)	I (99)		92.19	95.4265	2.64	2.47219	5.27	1.11248	-	0.247219	-	0.123609	-	-	100.1	99.382
M1	94 - 102	DRAVKLYRK	#R95K, R101K	38	809	X (0)	U (0)	Unchanged, Unchanged	-	0.123609	-	-	-	-	-	-	-	-	-	-	0	0.123609
		.K.....K.				I (92)	I (98)		84.28	94.4376	2.64	2.47219	5.27	1.11248	-	0.247219	-	0.123609	-	-	92.19	98.3931
M1	103 - 111	LKREITFHG	I107M	38	808	X (0)	U (0)	Unchanged	-	0.123762	-	-	-	-	-	-	-	-	-	-	0	0.123762
		....M....				I (100)	I (100)		92.19	95.9158	2.64	2.47525	5.27	1.11386	-	0.247525	-	0.123762	-	-	100.1	99.8762
M1	138 - 146	VTTEVAFGL	#T140A, #V142G, F144L	38	809	X (0)	U (0)	Unchanged, Unchanged, Unchanged	-	0.123609	-	-	-	-	-	-	-	-	-	-	0	0.123609
		..A.G.L..				I (100)	I (100)		92.19	95.9209	2.64	2.34858	5.27	1.11248	-	0.247219	-	0.123609	-	-	100.1	99.7528
M1	153 - 161	QIADSQHRS	S157A	38	808	X (0)	U (0)	Unchanged	-	0.123609	-	-	-	-	-	-	-	-	-	-	0	0.123609
		....A....				I (100)	I (100)		92.19	95.6737	2.64	2.47219	5.27	1.11248	-	0.247219	-	0.123609	-	-	100.1	99.6292
M1	162 - 170	HRQMVTTTN	V166A	38	809	X (0)	X (0)	Unchanged	-	-	-	-	-	-	-	-	-	-	-	-	0	0
		....A....				I (100)	I (98)		92.19	94.314	2.64	2.47219	5.27	0.988875	-	0.247219	-	0.123609	-	-	100.1	98.1459
M1	219 - 227	IGTHPSSSA	#I219V, #S224N, #A227T	38	809	X (0)	X (0)	Unchanged, Unchanged, Unchanged	-	-	-	-	-	-	-	-	-	-	-	-	0	0
		V....N..T				I (100)	I (98)		92.19	94.1904	2.64	2.47219	5.27	1.11248	-	0.247219	-	0.123609	-	-	100.1	98.1459
M1	230 - 238	KDDLLENLQ	L234I	38	809	X (0)	U (0)	Unchanged	-	0.123609	-	-	-	-	-	-	-	-	-	-	0	0.123609
		....I....				I (100)	I (99)		92.19	94.932	2.64	2.22497	5.27	0.988875	-	0.247219	-	0.123609	-	-	100.1	98.5167
M1	241 - 249	QKRMGVQMQ	#K242N, #M248L	38	809	X (0)	U (0)	Unchanged, Unchanged	-	0.123609	-	-	-	-	-	-	-	-	-	-	0	0.123609
		.N.....L.				I (95)	I (97)		92.19	93.3251	2.64	2.22497	-	1.11248	-	0.247219	-	0.123609	-	-	94.83	97.0334
M2	7 - 15	VETPTRNGW	#N13T	36	794	X (0)	U (0)	Unchanged	-	0.125786	-	-	-	-	-	-	-	-	-	-	0	0.125786
		......T..				I (69)	I (73)		66.71	70.6918	2.78	1.76101	-	0.503145	-	-	-	0.125786	-	-	69.49	73.0818
M2	17 - 25	CKCSDSSDP	#K18N, D24E	38	808	X (0)	U (0)	Unchanged, Unchanged	-	0.123457	-	-	-	-	-	-	-	-	-	-	0	0.123457
		.N..G..E.				I (66)	I (53)		63.24	52.0988	2.64	0.864198	-	-	-	-	-	-	-	-	65.88	52.963
M2	25 - 33	PLVIAASII	I28V, #S31N	38	808	X (0)	X (0)	Unchanged, Unchanged	-	-	-	-	-	-	-	-	-	-	-	-	0	0
		...V..N..				I (95)	I (93)		86.93	89.7531	2.64	2.34568	5.27	0.740741	-	0.246914	-	-	-	-	94.84	93.0864
M2	51 - 59	IYRRLKYGL	L55F	38	810	X (0)	X (0)	Unchanged	-	-	-	-	-	-	-	-	-	-	-	-	0	0
		....F....				I (100)	I (99)		92.19	95.4321	2.64	2.34568	5.27	1.11111	-	0.246914	-	0.123457	-	-	100.1	99.2593
M2	64 - 72	STEGVPESM	#V68M	38	796	X (0)	Mi (0)	Unchanged	-	0.251256	-	0.125628	-	-	-	-	-	-	-	-	0	0.376884
		....M....				I (100)	I (99)		92.19	94.8492	2.64	2.38693	5.27	1.13065	-	0.251256	-	0	-	-	100.1	98.6181
M2	78 - 86	QEQQSAVDV	S82N	38	796	X (0)	Ma (5)	Unchanged	-	4.8995	-	0.376884	-	-	-	-	-	-	-	-	0	5.27638
		....N....				I (98)	I (94)		92.19	90.7035	2.64	2.13568	2.86	1.00503	-	0.251256	-	0.125628	-	-	97.69	94.2211
M2	89 - 97	GHFVNIELE	E97K	35	712	X (0)	Mi (2)	Unchanged	-	1.54278	-	0.280505	-	-	-	-	-	-	-	-	0	1.82328
		........K				I (100)	I (96)		94.34	91.7251	-	2.24404	5.27	1.12202	-	0.280505	-	0.140252	-	-	99.61	95.5119
NS1	23 - 31	ADQELGDAP	L27M	38	798	Ma (21)	Ma (21)	Unchanged	18.44	19.0238	2.64	1.50188	-	0.125156	-	0.125156	-	-	-	-	21.08	20.776
		....M....				I (71)	I (72)		65.86	69.587	-	1.00125	5.27	1.00125	-	-	-	0.125156	-	-	71.13	71.7146
NS1	47 - 55	GSTLGLDIE	#G47S, E55R	38	806	X (0)	X (0)	Unchanged, Unchanged	-	-	-	-	-	-	-	-	-	-	-	-	0	0
		S.......R				I (97)	I (97)		89.56	92.0694	2.64	3	5.27	1.11524	-	0.247831	-	0.123916	-	-	97.47	96.5564
NS1	56 - 64	TATRAGKQI	A60E, Q63H	38	805	X (0)	X (0)	Unchanged, Unchanged	-	-	-	-	-	-	-	-	-	-	-	-	0	0
		....E..H.				I (92)	I (93)		84.3	88.8476	2.64	1.98265	5.27	1.11524	-	0.247831	-	0.123916	-	-	92.21	92.3172
NS1	74 - 82	DEALKMTIA	#L77F, #T80S	38	803	X (0)	X (0)	Unchanged	-	-	-	-	-	-	-	-	-	-	-	-	0	0
		...F..S..				I (71)	I (72)		65.85	70.1863	-	0.869565	5.27	0.993789	-	0.124224	-	0.124224	-	-	71.12	72.2981
NS1	83 - 91	SVPASRYLT	S87P	38	804	X (0)	U (0)	Unchanged	-	0.124069	-	-	-	-	-	-	-	-	-	-	0	0.124069
		....P....				I (97)	I (97)		89.56	92.928	2.64	2.48139	5.27	1.11663	-	0.124069	-	0.124069	-	-	97.47	96.7742
NS1	100 - 108	RDWFMLMPK	F103L, M106I	38	808	X (0)	X (0)	Unchanged, Unchanged	-	-	-	-	-	-	-	-	-	-	-	-	0	0
		...L..I..				I (100)	I (99)		92.19	94.9257	2.64	2.47525	5.27	1.11386	-	0.123762	-	0.123762	-	-	100.1	98.7624
NS1	107 - 115	PKQKVAGSL	V111I, A112T	38	808	X (0)	X (0)	Unchanged, Unchanged	-	-	-	-	-	-	-	-	-	-	-	-	0	0
		....IT...				I (79)	I (76)		73.76	73.6386	-	0.990099	5.27	0.742574	-	0.123762	-	0.123762	-	-	79.03	75.6188
NS1	122 - 130	AIMDKNIIL	M124V, I129T	38	808	X (0)	X (0)	Unchanged, Unchanged	-	-	-	-	-	-	-	-	-	-	-	-	0	0
		..V....T.				I (97)	I (93)		89.56	89.3564	2.64	1.85644	5.27	1.11386	-	0.247525	-	0.123762	-	-	97.47	92.698
NS1	137 - 145	IFDRLETLI	D139N, T143A	38	807	X (0)	X (0)	Unchanged, Unchanged	-	-	-	-	-	-	-	-	-	-	-	-	0	0
		..N...A..				I (100)	I (94)		92.19	90.3465	2.64	2.35149	5.27	1.11386	-	0.247525	-	0.123762	-	-	100.1	94.1832
NS1	168 - 176	GHTDEDVKN	E172K	38	808	X (0)	X (0)	Unchanged	-	-	-	-	-	-	-	-	-	-	-	-	0	0
		....K....				I (92)	I (98)		84.3	94.4307	2.64	2.47525	5.27	1.11386	-	0.247525	-	0.123762	-	-	92.21	98.3911
NS1	178 - 186	IGVLIGGLE	G179E, V180I, L185F	38	808	X (0)	X (0)	Unchanged, Unchanged, Unchanged	-	-	-	-	-	-	-	-	-	-	-	-	0	0
		.EI....F.				I (97)	I (96)		89.56	92.3267	2.64	2.35149	5.27	0.990099	-	0.123762	-	0.123762	-	-	97.47	95.9158
NS1	203 - 211	WRSSNEDGR	N207D	38	804	U (3)	Ma (5)	Unchanged	2.64	4.96278	-	-	-	-	-	-	-	-	-	-	2.64	4.96278
		....D....				I (82)	I (86)		73.77	82.3821	2.64	1.98511	5.27	1.11663	-	-	-	-	-	-	81.68	85.4839
NS1	208 - 216	EDGRPPLPP	P212S, P215S, #P216T	38	806	X (0)	X (0)	Unchanged, Reversed, Reversed	-	-	-	-	-	-	-	-	-	-	-	-	0	0
		....S..ST				I (66)	I (70)		60.6	68.9826	-	0.372208	5.27	0.868486	-	-	-	0.124069	-	-	65.87	70.3474
NS2	14 - 22	MRMSKMQLG	#M14T, G22R	38	809	X (0)	X (0)	Unchanged, Unchanged	-	-	-	-	-	-	-	-	-	-	-	-	0	0
		T.......R				I (95)	I (99)		86.93	95.0556	2.64	2.47219	5.27	1.11248	-	0.247219	-	0.123609	-	-	94.84	99.0111
NS2	45 - 53	LGEAVMRMG	V49A	38	807	X (0)	X (0)	Unchanged	-	-	-	-	-	-	-	-	-	-	-	-	0	0
		....A....				I (90)	I (97)		81.66	93.5723	2.64	2.22497	5.27	1.11248	-	0.123609	-	0.123609	-	-	89.57	97.157
a The HA protein sequence numeration is based on the H7N9 HA protein sequence alignment for consistency with other proteins. However, the literature generally uses H7 numeration without the 18 amino acids of the signal peptide. Thus, in order to correspond our position numbers to H7 numeration, 18aa of the signal peptide needs to be subtracted. Additionally, the nonamer sequences provided would h…

## Sheet: SupTable3D
Supplementary Table 3D | Avian-to-human (A2H) substitutions' net motif change influenza A(H7N9) viruses from 2014 and 2017 datasets.
Proteina	Positionb	Nonamer sequence (Avian & Human) c	Amino acid substitutiond	Avian virus sequencese					Human virus sequencese
				Number of sequences (#) f		Motif (incidence, %)g		Net motif change for each substitution between 2014 and 2017 datasetsh	Number of sequences (#) f		Motif (incidence, %) g		Net motif change for each substitution between 2014 and 2017 datasetsh
				2014	2017	2014	2017		2014	2017	2014	2017
PB2	187 - 195	KEKKEELQD	E191K	83	517	I (55)	I (83)	Unchanged	41	796	Ma (12)	I (52)	Reversed
		....K....				Ma (36)	Ma (14)				I (85)	Ma (44)
PB2	288 - 296	QIGGIRMVD	#I292V	84	518	I (56)	Ma (11)	Reversed	43	798	Ma (5)	Ma (4)	Unchanged
		....V....				Ma (44)	I (88)				I (95)	I (96)
PB2	385 - 393	IVSGRDEQS	#R389K	84	518	I (57)	Ma (11)	Reversed	41	799	X (0)	X (0)	Unchanged
		....K....				Ma (39)	I (86)				I (100)	I (100)
PB2	555 - 563	RNWETVKIQ	T559N	81	515	I (63)	I (84)	Unchanged	41	796	Ma (20)	I (54)	Reversed
		....N....				Ma (37)	Ma (14)				I (81)	Ma (44)
PB2	566 - 574	QDPTILYNK	I570M	-	513	N/A	I (61)	New	-	797	N/A	Ma (34)	New
		....M....				N/A	Ma (33)				N/A	I (62)
PB2	644 - 652	GMRILVRGN	#L648V	81	515	I (52)	Mi (9)	Reversed	41	799	X (0)	X (0)	Unchanged
		....V....				Ma (40)	I (52)				I (100)	I (75)
PB2	672 - 680	AGALTEDPD	#T676M	81	513	I (56)	Mi (10)	Reversed	41	801	X (0)	X (0)	Unchanged
		....M....				Ma (43)	I (52)				I (89)	I (73)
PB1	10 - 18	LKVPAQNAI	#A14V	75	508	I (52)	Ma (18)	Reversed	34	782	X (0)	Ma (3)	Unchanged
		....V....				Ma (47)	I (81)				I (100)	I (97)
PB1	44 - 52	NRTHQYSEK	#Q48K	85	519	I (59)	Ma (12)	Reversed	36	790	X (0)	X (0)	Unchanged
		....K....				Ma (41)	I (80)				I (97)	I (97)
PB1	109 - 117	ETMEVVQQT	V113I	85	519	I (59)	Ma (11)	Reversed	36	792	X (0)	U (0)	Unchanged
		....I....				Ma (41)	I (89)				I (100)	I (99)
PB1	168 - 176	KDVMESMDK	#E172D	85	519	I (59)	Mi (12)	Reversed	36	793	X (0)	X (0)	Unchanged
		....D....				Ma (39)	I (51)				I (86)	I (81)
PB1	253 - 261	YFVETLARS	#T257A	85	518	I (59)	Ma (12)	Reversed	36	789	X (0)	Mi (0)	Unchanged
		....A....				Ma (41)	I (87)				I (100)	I (99)
PB1	364 - 372	LRTQIPAEM	#I368V	85	518	I (55)	Ma (12)	Reversed	36	791	Ma (17)	Mi (2)	Unchanged
		....V....				Ma (41)	I (77)				I (83)	I (86)
PB1	381 - 389	FNESTRKKI	#E383K, #K387E	85	519	I (58)	Ma (11)	Reversed, Reversed	36	791	X (0)	X (0)	Unchanged, Unchanged
		..K...E..				Ma (41)	I (88)				I (100)	I (98)
PB1	423 - 431	ILNLGQKRY	#R430K	85	519	I (49)	Ma (9)	Reversed	36	794	X (0)	Mi (0)	Unchanged
		.......K.				Ma (49)	I (90)				I (100)	I (99)
PB1	521 - 529	ADMSIGVTV	I525V	85	519	I (73)	I (67)	Unchanged	36	792	Ma (25)	Ma (34)	Unchanged
		....V....				Ma (27)	Ma (33)				I (75)	I (66)
PB1	569 - 577	QTRRSFELK	#S573A	85	519	I (60)	Ma (11)	Reversed	36	789	X (0)	U (0)	Unchanged
		....A....				Ma (39)	I (88)				I (95)	I (98)
PB1	624 - 632	LCNPLNPFV	#L628M	85	519	I (59)	Ma (11)	Reversed	36	794	X (0)	X (0)	Unchanged
		....M....				Ma (41)	I (88)				I (100)	I (99)
PB1	634 - 642	HKEIESVNN	#E638D	85	519	I (59)	Ma (11)	Reversed	36	793	X (0)	X (0)	Unchanged
		....D....				Ma (41)	I (80)				I (83)	I (92)
PA	33 - 41	NKFAAICTH	#A37S	81	518	I (57)	Ma (11)	Reversed	36	798	X (0)	X (0)	Unchanged
		....S....				Ma (42)	I (88)				I (100)	I (98)
PA	58 - 66	GESIIVESG	#I61T, #V63I	81	517	I (56)	Ma (10)	Reversed, Reversed	36	798	X (0)	X (0)	Unchanged, Unchanged
		...T.I...				Ma (43)	I (85)				I (100)	I (98)
PA	92 - 100	NSICNTTGV	V100A	81	515	I (66)	I (43)	Unchanged	36	797	Mi (8)	Ma (18)	Unchanged
		........A				Ma (35)	Ma (38)				I (83)	I (69)
PA	257 - 265	IEPFLKTTP	#K262R	81	516	I (59)	Ma (29)	Reversed	36	795	X (0)	Ma (13)	Unchanged
		.....R...				Ma (41)	I (66)				I (97)	I (84)
PA	333 - 341	NYLLAWKQV	#A337T	82	513	I (57)	Mi (11)	Reversed	36	793	X (0)	U (0)	Unchanged
		....T....				Ma (41)	I (69)				I (89)	I (92)
PA	352 - 360	EKIPKTKNM	#K356R	82	513	I (56)	Ma (29)	Reversed	36	794	Ma (11)	Mi (7)	Unchanged
		....R....				Ma (39)	I (69)				I (89)	I (90)
PA	387 - 395	VSDLRQYDS	#S388N, D394N	82	516	I (41)	Mi (8)	Reversed, Unchanged	36	785	X (0)	X (0)	Reversed, Unchanged
		.N..K..N.				Ma (34)	Ma (37)				I (83)	I (67)
PA	407 - 415	IQSEFNKAC	#S409N	83	513	I (63)	Ma (20)	Reversed	36	786	Ma (6)	Mi (4)	Unchanged
		..N......				Ma (37)	I (79)				I (95)	I (96)
PA	419 - 427	DSSWIELDE	#I423V	84	516	I (58)	Ma (11)	Reversed	36	786	X (0)	Mi (0)	Unchanged
		....V....				Ma (41)	I (86)				I (95)	I (99)
PA	550 - 558	LRTAIGQVS	#I554V	84	515	I (58)	Ma (11)	Reversed	36	784	X (0)	Mi (1)	Unchanged
		....V....				Ma (42)	I (89)				I (100)	I (97)
PA	603 - 611	KEKDMTKEF	#M607L	84	515	I (57)	Ma (11)	Reversed	36	787	X (0)	U (0)	Unchanged
		....L....				Ma (42)	I (85)				I (100)	I (98)
PA	680 - 688	TFDLGGLYE	#G684E	83	511	I (58)	Ma (12)	Reversed	36	788	X (0)	Ma (5)	Unchanged
		....E....				Ma (42)	I (89)				I (100)	I (94)
PA	708 - 716	NSFLTHALK	K716R	79	509	I (57)	Ma (11)	Reversed	36	787	U (3)	Mi (1)	Unchanged
		........R				Ma (43)	I (78)				I (95)	I (97)
PA_X	33 - 41	NKFAAICTH	A37S	80	485	I (58)	Ma (11)	Reversed	36	90	X (0)	X (0)	Unchanged
		....S....				Ma (41)	I (89)				I (100)	I (99)
PA_X	58 - 66	GESIIVESG	I61T, V63I	79	484	I (56)	Ma (10)	Reversed, Reversed	36	90	X (0)	X (0)	Unchanged, Unchanged
		...T.I...				Ma (43)	I (85)				I (100)	I (98)
PA_X	92 - 100	NSICNTTGV	V100A	80	482	I (66)	I (42)	Unchanged	36	90	Mi (8)	Ma (12)	Unchanged
		........A				Ma (34)	Ma (39)				I (83)	I (76)
PA_X	192 - 200	VSPREAKRQ	P194L, R195K, R199K	80	481	I (45)	Mi (8)	Unchanged, Reversed, Reversed	36	90	X (0)	X (0)	Unchanged, Reversed, Reversed
		..LK...K.				Ma (36)	Ma (33)				I (89)	I (67)
PA_X	243 - 251	RASFLKCQK	K248R	77	477	I (58)	I (60)	Unchanged	35	89	Ma (17)	Ma (25)	Unchanged
		.....R...				Ma (35)	Ma (39)				I (82)	I (74)
HA	61 - 69	SKGKKTVDL	K65R	-	626	N/A	I (45)	New	-	814	N/A	Ma (24)	New
		....R....				N/A	Ma (42)				N/A	I (72)
HA	231 - 239	QVNGQSGRI	Q235L	99	628	I (65)	Ma (14)	Reversed	45	809	X (0)	Ma (2)	Unchanged
		....L....				Ma (35)	I (83)				I (95)	I (93)
HA	423 - 431	TRDSMTEVW	#M427I	100	632	I (51)	Ma (9)	Reversed	53	822	X (0)	X (0)	Unchanged
		....I....				Ma (43)	I (84)				I (100)	I (96)
HA	454 - 462	MNKLYERVR	#N455D, R462K	100	632	I (48)	Ma (8)	Reversed, Reversed	53	822	X (0)	X (0)	Unchanged, Unchanged
		.D......K				Ma (41)	I (87)				I (100)^	I (99)
NP	30 - 38	GRMVGGIGR	G34S	86	520	I (51)	Ma (13)	Reversed	36	783	X (0)	Mi (0)	Unchanged
		....S....				Ma (41)	I (85)				I (100)	I (98)
NP	48 - 56	KLSDYEGRL	#Y52N	86	520	I (49)	Ma (9)	Reversed	37	796	X (0)	X (0)	Unchanged
		....N....				Ma (41)	I (88)				I (100)	I (96)
NP	73 - 81	ERRNKYLEE	K77R	86	520	I (59)	Ma (12)	Reversed	37	797	X (0)	Ma (1)	Unchanged
		....R....				Ma (41)	I (88)				I (100)	I (99)
NP	182 - 190	AVKGVGTMV	#V186I	86	520	I (58)	Ma (12)	Reversed	37	795	X (0)	X (0)	Unchanged
		....I....				Ma (41)	I (85)				I (97)	I (98)
NP	348 - 356	RGTRVVPRG	#V352M	86	520	I (42)	Ma (8)	Reversed	37	793	X (0)	X (0)	Unchanged
		....M....				Ma (40)	I (87)				I (84)	I (91)
NP	371 - 379	METMDSSTL	T373A, S377N	86	520	I (50)	Mi (10)	Reversed, Reversed	37	797	X (0)	X (0)	Unchanged, Unchanged
		..A...N..				Ma (29)	I (45)				I (70)	I (79)
NP	402 - 410	SAGQISVQP	#I406V	86	520	I (61)	Ma (12)	Reversed	37	798	X (0)	Ma (5)	Unchanged
		....V....				Ma (40)	I (76)				I (100)	I (92)
NP	478 - 486	SFDMSNEGS	S482N	85	518	I (58)	Ma (13)	Reversed	37	779	U (3)	Ma (10)	Unchanged
		....N....				Ma (41)	I (86)				I (96)	I (89)
NA	392 - 400	IVLNTDWSG	#T401A	92	620	I (54)	Ma (10)	Reversed	47	814	X (0)	Ma (1)	Unchanged
		....A....				Ma (44)	I (89)				I (100)^	I (97)
M1	11 - 19	VLSIVPSGP	V15I	85	519	I (59)	Ma (11)	Reversed	38	795	X (0)	X (0)	Unchanged
		....I....				Ma (41)	I (88)				I (100)	I (100)
M1	33 - 41	AGKNTDLEA	#T37A	86	522	I (57)	Ma (11)	Reversed	38	808	X (0)	Mi (0)	Unchanged
		....A....				Ma (41)	I (86)				I (100)	I (98)
M1	42 - 50	LMEWLKTRP	#L46I	86	523	I (58)	Ma (11)	Reversed	38	809	X (0)	U (0)	Unchanged
		....I....				Ma (41)	I (89)				I (100)	I (99)
M1	94 - 102	DRAVKLYRK	#R95K, R101K	86	522	I (59)	Ma (11)	Reversed, Reversed	38	809	X (0)	U (0)	Unchanged, Unchanged
		.K.....K.				Ma (31)	I (82)				I (92)	I (98)
M1	103 - 111	LKREITFHG	I107M	86	522	I (59)	Ma (12)	Reversed	38	808	X (0)	U (0)	Unchanged
		....M....				Ma (41)	I (88)				I (100)	I (100)
M1	138 - 146	VTTEVAFGL	#T140A, #V142G, F144L	86	522	I (59)	Ma (11)	Reversed, Reversed, Reversed	38	809	X (0)	U (0)	Unchanged, Unchanged, Unchanged
		..A.G.L..				Ma (40)	I (88)				I (100)	I (100)
M1	153 - 161	QIADSQHRS	S157A	86	523	I (59)	Ma (12)	Reversed	38	808	X (0)	U (0)	Unchanged
		....A....				Ma (38)	I (88)				I (100)	I (100)
M1	162 - 170	HRQMVTTTN	V166A	86	522	I (57)	Ma (11)	Reversed	38	809	X (0)	X (0)	Unchanged
		....A....				Ma (40)	I (79)				I (100)	I (98)
M1	219 - 227	IGTHPSSSA	#I219V, #S224N, #A227T	86	523	I (59)	Ma (11)	Reversed, Reversed, Reversed	38	809	X (0)	X (0)	Unchanged, Unchanged, Unchanged
		V....N..T				Ma (41)	I (87)				I (100)	I (98)
M1	230 - 238	KDDLLENLQ	L234I	86	523	I (59)	Ma (11)	Reversed	38	809	X (0)	U (0)	Unchanged
		....I....				Ma (40)	I (86)				I (100)	I (99)
M1	241 - 249	QKRMGVQMQ	#K242N, #M248L	86	523	I (59)	Ma (12)	Reversed, Reversed	38	809	X (0)	U (0)	Unchanged, Unchanged
		.N.....L.				Ma (40)	I (86)				I (95)	I (97)
M2	7 - 15	VETPTRNGW	#N13T	83	520	I (53)	Mi (10)	Reversed	36	794	X (0)	U (0)	Unchanged
		......T..				Ma (31)	I (51)				I (69)	I (73)
M2	17 - 25	CKCSDSSDP	#K18N, D24E	84	522	I (39)	Mi (8)	Reversed, Reversed	38	808	X (0)	U (0)	Unchanged, Unchanged
		.N..G..E.				Ma (29)	I (46)				I (66)	I (53)
M2	25 - 33	PLVIAASII	I28V, #S31N	84	522	I (42)	Ma (9)	Reversed, Reversed	38	808	X (0)	X (0)	Unchanged, Unchanged
		...V..N..				Ma (41)	I (80)				I (95)	I (93)
M2	51 - 59	IYRRLKYGL	L55F	84	522	I (54)	Ma (11)	Reversed	38	810	X (0)	X (0)	Unchanged
		....F....				Ma (43)	I (87)				I (100)	I (99)
M2	64 - 72	STEGVPESM	#V68M	84	521	I (58)	Ma (12)	Reversed	38	796	X (0)	Mi (0)	Unchanged
		....M....				Ma (41)	I (87)				I (100)	I (99)
M2	78 - 86	QEQQSAVDV	S82N	84	521	I (55)	Ma (11)	Reversed	38	796	X (0)	Ma (5)	Unchanged
		....N....				Ma (45)	I (88)				I (98)	I (94)
M2	89 - 97	GHFVNIELE	E97K	82	502	I (56)	Ma (13)	Reversed	35	712	X (0)	Mi (2)	Unchanged
		........K				Ma (41)	I (85)				I (100)	I (96)
NS1	23 - 31	ADQELGDAP	L27M	87	536	I (58)	I (51)	Unchanged	38	798	Ma (21)	Ma (21)	Unchanged
		....M....				Ma (36)	Ma (25)				I (71)	I (72)
NS1	47 - 55	GSTLGLDIE	#G47S, E55R	87	536	I (55)	Ma (10)	Reversed, Reversed	38	806	X (0)	X (0)	Unchanged, Unchanged
		S.......R				Ma (41)	I (88)				I (97)	I (97)
NS1	56 - 64	TATRAGKQI	A60E, Q63H	87	533	I (53)	Ma (10)	Reversed, Reversed	38	805	X (0)	X (0)	Unchanged, Unchanged
		....E..H.				Ma (41)	I (83)				I (92)	I (93)
NS1	74 - 82	DEALKMTIA	#L77F, #T80S	86	535	I (57)	Ma (11)	Reversed, Reversed	38	803	X (0)	X (0)	Unchanged
		...F..S..				Ma (40)	I (48)				I (71)	I (72)
NS1	83 - 91	SVPASRYLT	S87P	87	533	I (53)	Ma (10)	Reversed	38	804	X (0)	U (0)	Unchanged
		....P....				Ma (40)	I (79)				I (97)	I (97)
NS1	100 - 108	RDWFMLMPK	F103L, M106I	87	536	I (56)	Ma (11)	Reversed, Reversed	38	808	X (0)	X (0)	Unchanged, Unchanged
		...L..I..				Ma (41)	I (88)				I (100)	I (99)
NS1	107 - 115	PKQKVAGSL	V111I, A112T	87	536	I (56)	Ma (11)	Reversed, Reversed	38	808	X (0)	X (0)	Unchanged, Unchanged
		....IT...				Ma (41)	I (46)				I (79)	I (76)
NS1	122 - 130	AIMDKNIIL	M124V, I129T	87	536	I (44)	Ma (9)	Reversed, Reversed	38	808	X (0)	X (0)	Unchanged, Unchanged
		..V....T.				Ma (40)	I (82)				I (97)	I (93)
NS1	137 - 145	IFDRLETLI	D139N, T143A	87	536	I (55)	Ma (10)	Reversed, Reversed	38	807	X (0)	X (0)	Unchanged, Unchanged
		..N...A..				Ma (40)	I (83)				I (100)	I (94)
NS1	168 - 176	GHTDEDVKN	E172K	87	536	I (55)	Ma (10)	Reversed	38	808	X (0)	X (0)	Unchanged
		....K....				Ma (43)	I (88)				I (92)	I (98)
NS1	178 - 186	IGVLIGGLE	G179E, V180I, L185F	87	534	I (55)	Ma (11)	Reversed, Reversed, Reversed	38	808	X (0)	X (0)	Unchanged, Unchanged, Unchanged
		.EI....F.				Ma (40)	I (83)				I (97)	I (96)
NS1	203 - 211	WRSSNEDGR	N207D	87	536	I (48)	Ma (20)	Reversed	38	804	U (3)	Ma (5)	Unchanged
		....D....				Ma (39)	I (61)				I (82)	I (86)
NS1	208 - 216	EDGRPPLPP	P212S, P215S, #P216T	87	533	I (56)	Mi (11)	Reversed, Reversed, Reversed	38	806	X (0)	X (0)	Unchanged, Reversed, Reversed
		....S..ST				Ma (37)	I (42)				I (66)	I (70)
NS2	14 - 22	MRMSKMQLG	#M14T, G22R	85	534	I (54)	Ma (10)	Reversed, Reversed	38	809	X (0)	X (0)	Unchanged, Unchanged
		T.......R				Ma (42)	I (82)				I (95)	I (99)
NS2	45 - 53	LGEAVMRMG	V49A	85	535	I (55)	Ma (11)	Reversed	38	807	X (0)	X (0)	Unchanged
		....A....				Ma (40)	I (79)				I (90)	I (97)
a The HA protein sequence numeration is based on the H7N9 HA protein sequence alignment for consistency with other proteins. However, the literature generally uses H7 numeration without the 18 amino acids of the signal peptide. Thus, in order to correspond our position numbers to H7 numeration, 18aa of the signal peptide needs to be subtracted. Additionally, the nonamer sequences provided would h…
