# Supplementary material for: Avian Influenza H7N9 Virus Adaptation to Human Hosts
Source: Viruses. 2021 May 10;13(5):871. doi: 10.3390/v13050871 (PMC8150935; doi:10.3390/v13050871)
Supplement: Supplementary file 1 [file viruses-13-00871-s001.zip › SUPPLEMENTARY TABLE 4.xlsx]

## Sheet: Sheet1
Supplementary Table 4 | Avian-to-human (A2H) substitutions with 100% incidence in human H7N9 viruses and first identified in 2013.
Proteina	Positionb	Nonamer sequence (Avian & Human)c	Amino acid substitution	Avian virus sequencesd																				Human virus sequencesd					Remarks
				Number of sequencese	Motif (incidence, %)f	Avian species source of isolation (%)																		Number of sequencese	Motif (incidence, %)f	Geographical area (%)
						Chicken	Duck (domestic)	Wild duck	Pigeon	Tree sparrow	Eurasian teal	Wild pigeon	Mallard	Homing pigeon	Turkey	Blue-winged teal	Goose	Guinea fowl	Ruddy turnstone	Northern shoverl	Emperor goose	Wild bird	Spot-billed duck			China	Hong Kong	Taiwan	Functiong	Structure localization
PB1	109 - 117	ETMEVVQQT	V113I	85	I (59)	-	12.95	14.12	-	-	1.18	-	1.18	-	11.77	3.53	3.53	1.18	2.36	1.18	1.18	3.53	1.18	36	X (0)	-	-	-	-	-
		....I....			Ma (41)	30.59	2.36	-	3.53	2.36	-	1.18	-	1.18	-	-	-	-	-	-	-	-	-		I (100)	91.73	2.78	5.56
PA_X	33 - 41	NKFAAICTH	A37S	80	I (58)	-	13.75	15	-	-	1.25	-	1.25	-	7.5	3.75	3.75	1.25	2.5	1.25	1.25	3.75	1.25	36	X (0)	-	-	-	-	-
		....S....			Ma (41)	30	2.5	-	3.75	2.5	-	1.25	-	1.25	-	-	-	-	-	-	-	-	-		I (100)	91.73	2.78	5.56
PA_X	58 - 66	GESIIVESG	I61T, V63I	79	I (56)	-	13.93	15.19	-	-	1.27	-	1.27	-	6.33	3.8	3.8	1.27	1.27	1.27	1.27	3.8	1.27	36	X (0)	-	-	-	-	-
		...T.I...			Ma (43)	31.65	2.54	-	3.8	2.54	-	1.27	-	1.27	-	-	-	-	-	-	-	-	-		I (100)	91.73	2.78	5.56
HA	454 - 462	MNKLYERVR	R462K	100	I (48)	-	12	10	-	-	-	-	2	-	9	3	2	2	2	1	1	3	1	53	X (0)	-	-	-	-	Domain HA2; Coiled coil region; partially exposed
		.D......K			Ma (41)	32	2	-	3	2	-	1	-	1	-	-	-	-	-	-	-	-	-		I (100)	94.42	1.89	5.56
NP	30 - 38	GRMVGGIGR	G34S	86	I (51)	-	12.8	11.63	-	-	1.17	-	2.33	-	4.66	3.49	3.49	1.17	3.49	1.17	1.17	3.49	1.17	36	X (0)	-	-	-	-	-
		....S....			Ma (41)	30.24	2.33	-	3.49	2.33	-	1.17	-	1.17	-	-	-	-	-	-	-	-	-		I (100)	91.72	2.78	5.41
NP	73 - 81	ERRNKYLEE	K77R	86	I (59)	-	12.8	12.8	-	-	1.17	-	2.33	-	11.63	3.49	3.49	1.17	3.49	1.17	1.17	3.49	1.17	37	X (0)	-	-	-	-	-
		....R....			Ma (41)	30.24	2.33	-	3.49	2.33	-	1.17	-	1.17	-	-	-	-	-	-	-	-	-		I (100)	91.98	2.71	5.41
M1	11 - 19	VLSIVPSGP	V15I	85	I (59)	-	12.95	12.95	-	-	1.18	-	1.18	-	11.77	3.53	3.53	1.18	3.53	1.18	1.18	3.53	1.18	38	X (0)	-	-	-	Membrane Binding (MB)	-
		....I....			Ma (41)	30.59	2.36	-	3.53	2.36	-	1.18	-	1.18	-	-	-	-	-	-	-	-	-		I (100)	92.19	2.64	5.27
M1	103 - 111	LKREITFHG	I107M	86	I (59)	-	12.8	13.96	-	-	1.17	-	1.17	-	11.63	3.49	3.49	1.17	3.49	1.17	1.17	3.49	1.17	38	X (0)	-	-	-	MB	-
		....M....			Ma (41)	30.24	2.33	-	3.49	2.33	-	1.17	-	1.17	-	-	-	-	-	-	-	-	-		I (100)	92.19	2.64	5.27
M1	138 - 146	VTTEVAFGL	F144L	86	I (59)	-	12.8	13.96	-	-	1.17	-	1.17	-	11.63	3.49	3.49	1.17	3.49	1.17	1.17	3.49	1.17	38	X (0)	-	-	-	MB	-
		..A.G.L..			Ma (40)	29.07	2.33	-	3.49	2.33	-	1.17	-	1.17	-	-	-	-	-	-	-	-	-		I (100)	92.19	2.64	5.27
M1	153 - 161	QIADSQHRS	S157A	86	I (59)	-	12.8	13.96	-	-	1.17	-	1.17	-	11.63	3.49	3.49	1.17	3.49	1.17	1.17	3.49	1.17	38	X (0)	-	-	-	MB	-
		....A....			Ma (38)	27.91	2.33	-	3.49	2.33	-	1.17	-	1.17	-	-	-	-	-	-	-	-	-		I (100)	92.19	2.64	5.27
M1	162 - 170	HRQMVTTTN	V166A	86	I (57)	-	12.8	13.96	-	-	1.17	-	1.17	-	9.31	3.49	3.49	1.17	3.49	1.17	1.17	3.49	1.17	38	X (0)	-	-	-	Ribonucleoprotein Binding (RNPB)	-
		....A....			Ma (40)	29.07	2.33	-	3.49	2.33	-	1.17	-	1.17	-	-	-	-	-	-	-	-	-		I (100)	92.19	2.64	5.27
M1	230 - 238	KDDLLENLQ	L234I	86	I (59)	-	12.8	13.96	-	-	1.17	-	1.17	-	11.63	3.49	3.49	1.17	3.49	1.17	1.17	3.49	1.17	38	X (0)	-	-	-	RNPB	-
		....I....			Ma (40)	29.07	2.33	-	3.49	2.33	-	1.17	-	1.17	-	-	-	-	-	-	-	-	-		I (100)	92.19	2.64	5.27
NS1	100 - 108	RDWFMLMPK	F103L, M106I	87	I (56)	-	12.65	13.8	-	-	1.15	-	1.15	-	11.5	3.45	3.45	1.15	3.45	1.15	-	2.3	1.15	38	X (0)	-	-	-	-	-
		...L..I..			Ma (41)	31.04	2.3	-	3.45	2.3	-	1.15	-	1.15	-	-	-	-	-	-	-	-	-		I (100)	92.19	2.64	5.27
NS1	137 - 145	IFDRLETLI	D139N, T143A	87	I (55)	-	12.65	12.65	-	-	1.15	-	1.15	-	11.5	3.45	3.45	1.15	3.45	1.15	-	2.3	1.15	38	X (0)	-	-	-	Nuclear Export Signal (NES)	-
		..N...A..			Ma (40)	29.89	2.3	-	3.45	2.3	-	1.15	-	1.15	-	-	-	-	-	-	-	-	-		I (100)	92.19	2.64	5.27
a HA protein sequence numeration is based on the H7N9 HA protein sequence alignment for consistency with other proteins. However, the literature generally uses H7 numeration without the 18 amino acids of the signal peptide. Thus, in order to correspond our position numbers to H7 numeration, 18aa of the signal peptide needs to be subtracted. Additionally, the nonamer sequences provided would help …
