# Supplementary material for: Avian Influenza H7N9 Virus Adaptation to Human Hosts
Source: Viruses. 2021 May 10;13(5):871. doi: 10.3390/v13050871 (PMC8150935; doi:10.3390/v13050871)
Supplement: Supplementary file 1 [file viruses-13-00871-s001.zip › SUPPLEMENTARY TABLE 5.xlsx]

## Sheet: Sheet1
Supplementary Table 5 | Amino acid substitutions specific to human influenza A(H7N9) virus.
Human virus sequences
Proteina	Positionb	Nonamer sequencec	Amino acid substitution&	Number of sequencesd	Motif (incidence, %)e, f	Geographical area (%)e			Overlapping or adjacent A2H substitution sites&
						China	Hong Kong	Taiwan
PB2	5 - 13	KELRDLMSQ		39	I (95)	92	3	-
		....Y....	D9Y		Ma (5)	5	-	-
PB2	83 - 91	DAGSDRVMV		41	I (95)	87.84	2.44	4.88
		....N....	D87N		Ma (5)	4.88	-	-
PB2	135 - 143	FRNQVKIRR		41	I (88)	82.96	-	4.88
		....I....	*V139I		Ma (12)	9.76	2.44	-
PB2	177 - 185	LTSESQLTI		41	I (98)	90.28	2.44	4.88
		....P....	S181P		U (2)	2.44	-	-
PB2	192 - 200	ELQDCKIAP		41	I (93)	85	2	4.88	E191K
		...E.R...	^D195E, ^K197R		U (2)	2.44	-	-
PB2	220 - 228	VAGGTSSVY		41	I (98)	90.28	2.44	4.88
		....S....	T224S		U (2)	2.44	-	-
PB2	247 - 255	GGEVRNDDV		41	I (95)	87.84	2.44	4.88
		....K....	R251K		Ma (5)	4.88	-	-
PB2	270 - 278	ATVSADPLA		41	I (95)	92.72	2.44	-
		....V....	A274V		Ma (5)	-	-	4.88
PB2	280 - 288	LLEMCHSTQ		43	I (98)	93.09	-	4.66	I292V
		...I..G..	^M283I, ^S286G		U (2)	-	2.33	-
PB2	340 - 348	REEEVLTGN		42	I (98)	90.58	2.39	4.77
		........K	N348K		U (2)	2.39	-	-
PB2	350 - 358	QTLKIRVHE		41	I (98)	90.28	2.44	4.88
		....V....	I354V		U (2)	2.44	-	-
PB2	391 - 399	EQSIAEAII		41	I (98)	90.28	2.44	4.88	R389K
		....S....	^A395S		U (2)	2.44	-	-
PB2	416 - 424	GDLNFVNRA		41	I (98)	90.28	2.44	4.88
		....L....	F420L		U (2)	2.44	-	-
PB2	519 - 527	SETQGTEKL		41	I (93)	85.4	2.44	4.88
		.......R.	K526R		Ma (5)	4.88	-	-
		..I......	T521I		U (2)	2	-	-
PB2	565 - 573	SQDPTMLYN		41	I (88)	82.96	-	4.88
		....AI...	*T569A, *M570I		Ma (10)	9.76	-	-
PB2	587 - 595	AARGQYSGF		41	I (81)	73	2	5
		....K....	*Q591K		Ma (12)	12	-	-
		....L....	Q591L		Mi (5)	5	-	-
PB2	662 - 670	TKRLTVLGK		41	I (95)	90.28	2.44	2.44
		..K......	R664K		U (2)	2.44	-	-
		......F..	L668F		U (2)	-	-	2.44
PB2	672 - 680	AGALMEDPD		41	I (88)	82.96	-	4.88	T676M
		....V....	*M676V#		Ma (12)	9.76	2.44	-
PB2	697 - 705	LGKEDKRYG		40	I (95)	87.5	2.5	5
		....N....	D701N		Ma (5)	5	-	-
PB2	735 - 743	MKRKRDSSI		41	I (93)	85.4	2.44	4.88
		.....A...	D740A		Ma (5)	4.88	-	-
		.E.....FL	K736E, S742F, I743L		U (2)	2.44	-	-
PB2	751 - 759	TKRIRMAIN		40	I (98)	90	2.5	5
		........Q	N759Q		U (3)	2.5	-	-
PB1	1 - 9	MDVNPTLLF		29	I (97)	93.15	3.45	-
		...H.....	N4H		U (3)	3.45	-	-
PB1	42 - 50	TVNRTHKYS		36	I (97)	88.95	2.78	5.56	Q48K
		...K.....	^R45K		U (3)	2.78	-	-
PB1	101 - 109	GIFENSCLE		36	I (97)	91.73	-	5.56	V113I
		....H....	^N105H		U (3)	-	2.78	-
PB1	167 - 175	LKDVMDSMD		36	I (86)	77.83	2.78	5.56	E172D
		....V....	*M171V^		Ma (14)	13.9	-	-
PB1	174 - 182	MDKEEMEIT		36	I (97)	91.73	-	5.56
		....D....	E178D		U (3)	-	2.78	-
PB1	191 - 199	VRDNMTKKM		36	I (97)	88.95	2.78	5.56
		....T....	M195T		U (3)	2.78	-	-
PB1	334 - 342	RNVLSIAPI		36	I (95)	86.17	2.78	5.56
		....G....	S338G		U (3)	2.78	-	-
		....I....	S338I		U (3)	2.78	-	-
PB1	357 - 365	FESKSMKLR		36	I (97)	88.95	2.78	5.56	I368V
		....N....	^S361N		U (3)	2.78	-	-
PB1	371 - 379	EMLANIDLK		36	I (92)	83	2.78	5.56	E383K
		...V.....	A374V		Ma (6)	5.56	-	-
		..P..VG..	L373P, ^I376V, ^D377G		U (3)	2.78	-	-
PB1	393 - 401	RPLLIDGTA		35	I (86)	77.19	2.86	5.72
		....M....	*I397M		Ma (14)	14.29	-	-
PB1	450 - 458	IVNAPNHEG		36	I (89)	80.62	2.78	5.56
		....L....	*P454L		Ma (11)	11.12	-	-
PB1	628 - 636	MNPFVSHKE		36	I (95)	91.73	2.78	-
		....A....	V632A		Ma (6)	-	-	5.56
PB1	633 - 641	SHKEIDSVN		36	I (83)	75.06	2.78	5.56	E638D
		....V....	*I637V^		Ma (17)	16.68	-	-
PB1	678 - 686	SQRGILEDE		36	I (97)	91.73	-	5.56
		....V....	I682V		U (3)	-	2.78	-
PB1	687 - 695	QMYQKCCNL		36	I (83)	75.05	2.78	5.56
		....R....	K691R		U (3)	2.78	-	-
PB1	721 - 729	RARIDARID		36	I (95)	86.17	2.78	5.56
		....G....	D725G		U (3)	2.78	-	-
PB1_F2	25 - 33	QRTQRLEHP		27	I (96)	85.24	3.71	7.41
		........L	P33L		U (4)	3.71	-	-
PB1_F2	38 - 46	LMDHYLRTT		27	I (56)	48	-	7
		...RC....	*H41R, *Y42C		Ma (22)	19	4	-
PB1_F2	47 - 55	SRVGMHKRI		30	I (70)	60.03	3.34	6.67
		....T....	*M51T		Ma (20)	20.01	-	-
PB1_F2	55 - 63	IVYWKQWLS		29	I (83)	72	3	7
		....R....	*K59R		Ma (17)	17	-	-
PB1_F2	62 - 70	LSLKNLTQG		29	I (76)	66	3	7
		......I..	*T68I		Ma (17)	17	-	-
		........E	G70E		Mi (7)	7	-	-
PB1_F2	70 - 78	GSLKTRVSK		29	I (66)	58.65	-	6.9
		.F.......	S71F		Ma (17)	17	-	-
		.......L.	S77L		Mi (7)	6.9	-	-
		.F.N.....	S71F, K73N		U (3)	-	3	-
PB1_F2	82 - 90	LFSKQEWIN		29	I (86)	79.35	-	6.9
		.....G...	E87G		U (3)	3.45	-	-
PA	92 - 100	NSICNTTGA		36	I (83)	78	-	6	V100A
		....H....	^N96H		Ma (8)	8	-	-
PA	100 - 108	AEKPKFLPD		36	I (78)	75.05	-	2.78
		........N	D108N		U (3)	-	-	3
		.....L...	F105L		U (3)	2.78	-	-
PA	110 - 118	YDYKENRFI		36	I (83)	80.61	2.78	-
		.....S...	N115S		Ma (8)	8.34	-	-
		...E.....	K113E		Mi (6)	-	-	5.56
		.....D...	N115D		U (3)	2.78	-	-
PA	188 - 196	WDSFRQSER		36	I (97)	88.95	2.78	5.56
		....C....	R192C		U (3)	2.78	-	-
PA	202 - 210	EERFEITGT		36	I (97)	88.95	2.78	5.56
		....V....	E206V		U (3)	2.78	-	-
PA	233 - 241	VDGFEPNGC		36	I (97)	88.95	2.78	5.56
		....G....	E237G		U (3)	2.78	-	-
PA	261 - 269	LRTTPRPLR		36	I (86)	83	3	-	K262R
		..A......	^T263A		U (3)	3	-	-
PA	295 - 303	PSHEGEGIP		36	I (97)	88.95	2.78	5.56
		....R....	G299R		U (3)	2.78	-	-
PA	335 - 343	LLTWKQVLA		36	I (83)	78	-	5.56	A337T
		.M.......	*L336M^		Ma (11)	8.34	2.78	-
		........T	^A343T		Mi (6)	5.56	-	-
PA	360 - 368	MKKTSQLKW		36	I (92)	83.39	2.78	5.56	K356R
		....G....	^S364G		Ma (6)	5.56	-	-
		....V....	^S364V		U (3)	2.78	-	-
PA	395 - 403	SDEPEPRSL		36	I (92)	83	3	6	D394N
		.....A...	^P400A		Ma (6)	6	-	-
		........V	^L403V		U (3)	3	-	-
PA	481 - 489	QLIPMISKC		36	I (97)	91.73	2.78	2.78
		....L....	M485L		U (3)	-	-	2.78
PA	507 - 515	GRSHLRNDT		36	I (97)	91.73	2.78	2.78
		....W....	L511W		U (3)	-	-	2.78
PA	515 - 523	TDVVNFVSM		36	I (95)	86.17	2.78	5.56
		....T....	N519T		Ma (6)	5.56	-	-
PA	552 - 560	TAVGQVSRP		36	I (95)	91.73	2.78	-	L554V
		....R....	^Q556R		Ma (6)	-	-	5.56
PA	615 - 623	KSETWPIGE		36	I (86)	77.84	2.78	5.56
		...K.....	*T618K		Ma (11)	11.12	-	-
		......S..	I621S		U (3)	2.78	-	-
PA	704 - 712	ASWFNSFLT		35	I (94)	86	3	6	K716R
		.....T...	^S709T		U (3)	3	-	-
		...V.....	F707V		U (3)	3	-	-
PA_X	92 - 100	NSICNTTGV		36	Mi (8)	5.56	2.78	-	V100A
		....H....	^N96H		Ma (8)	8.34	-	-
PA_X	97 - 105	TTGAEKPKF		36	I (81)	75.05	-	5.56
		........L	F105L		U (3)	2.78	-	-
PA_X	108 - 116	DLYDYKENR		36	I (83)	81	3	-
		.......S.	N115S		Ma (8)	8	-	-
		.....E...	K113E		U (3)	-	-	3
		N....E...	D108N, K113E		U (3)	-	-	3
		.......D.	N115D		U (3)	3	-	-
PA_X	232 - 240	MWMDSNRTA		35	I (94)	86	3	6
		....L....	S236L		U (3)	3	-	-
		.....D...	N237D		U (3)	3	-	-
HA	12 - 20	AIIPTNADK		45	I (98)	91.2	2.23	4.45
		....A....	T16A		U (2)	2.23	-	-
HA	52 - 60	ERTNIPRIC		45	I (98)	91.2	2.23	4.45
		....F....	I56F		U (2)	2.23	-	-
HA	137 - 145	GIRTNGATS		45	I (82)	78	-	4
		...A.....	*T140A		Ma (16)	13	2	-
		......S..	A143S		U (2)	2	-	-
HA	169 - 177	AFPQMTKSY		45	I (98)	91.2	2.23	4.45
		....I....	M173I		U (2)	2.23	-	-
HA	228 - 236	ARPQVNGLS		45	I (93)	87	2	4	Q235L
		.G.......	^R229G		U (2)	2.23	-	-
		...P.....	^Q231P		U (2)	2.23	-	-
		.......I.	#L235I		U (2)	2.23	-	-
HA	281 - 289	QVDANCEGD		45	I (96)	88.96	2.23	4.45
		....D....	N285D		Ma (4)	4.46	-	-
HA	287 - 295	EGDCYHSGG		45	I (98)	91.2	2.23	4.45
		....H....	Y291H		U (2)	2.23	-	-
HA	296 - 304	TIISNLPFQ		45	I (98)	93.42	-	4.45
		....S....	N300S		U (2)	-	2.23	-
HA	354 - 362	EGLIDGWYG		45	I (98)	91.2	2.23	4.45
		....N....	D358N		U (2)	2.23	-	-
HA	549 - 557	VKNGNMRCT		50	I (86)	82	2	2
		..SR.....	*N551S, *G552R		Ma (10)	10	-	-
		...R.....	*G552R		U (2)	2	-	-
		..SR.K...	*N551S, *G552R, M554K		U (2)	2	-	-
NP	11 - 19	EQMETGGER		37	I (97)	89.27	2.71	5.41
		....K....	T15K		U (3)	2.71	-	-
NP	18 - 26	ERQNATEIR		37	I (97)	89.28	2.71	5.41
		....T....	A22T		U (3)	2.71	-	-
NP	94 - 102	GPIYRRRDG		37	I (92)	83.86	2.71	5.41
		....K....	R98K		Ma (8)	8.13	-	-
NP	160 - 168	DPRMCSLMQ		37	I (97)	91.98	2.71	2.71
		....P....	C164P		U (3)	-	-	2.71
NP	178 - 186	AAGAAVKGI		37	I (97)	89	3	5	V186I
		....S....	^A182S		U (3)	3	-	-
NP	278 - 286	ACVYGLAVA		37	I (92)	84	3	5
		......T..	A284T		Ma (5)	5	-	-
		..A......	V280A		U (3)	3	-	-
NP	295 - 303	GYSLVGIDP		37	I (97)	91.98	2.71	2.71
		....I....	V299I		U (3)	-	-	2.71
NP	309 - 317	NSQVFSLIR		37	I (97)	91.98	-	5.41
		....L....	F313L		U (3)	-	2.71	-
NP	346 - 354	FIRGTRMVP		37	I (84)	75.76	2.71	5.41	V352M
		.......G.	*V353G^		Ma (11)	10.82	-	-
		..K......	^R348K		U (3)	2.71	-	-
		......IC.	^M352I, ^V353C		U (3)	2.71	-	-
NP	355 - 363	RGQLSTRGV		37	I (97)	91.98	-	5.41
		....A....	S359A		U (3)	-	2.71	-
NP	372 - 380	EAMDSNTLE		37	I (84)	76	3	5	T373A, S377N
		...E.....	*D375E^		Ma (16)	16	-	-
NP	429 - 437	FTGNTEGRT		37	I (97)	91.98	-	5.41
		....A....	T433A		U (3)	-	2.71	-
NP	442 - 450	TEIIRMMES		37	I (97)	89.28	2.71	5.41
		....G....	R446G		U (3)	2.71	-	-
NP	469 - 477	EKATNPIVP		37	I (97)	89.28	2.71	5.41
		....D....	N473D		U (3)	2.71	-	-
NA	10 - 18	TSATAIIIG		40	I (85)	78	3	5
		......T..	I16T		Ma (8)	8	-	-
		S........	T10S		U (3)	3	-	-
		...M..V..	T13M, I16V		U (3)	3	-	-
NA	18 - 26	GAIAVLIGI		42	I (91)	83	2	5
		.T......M	A19T, I26M		U (2)	2	-	-
		........M	I26M		U (2)	2	-	-
NA	50 - 58	TTNTSQTII		42	I (98)	90.58	2.39	4.77
		....I....	S54I		U (2)	2.39	-	-
NA	60 - 68	NYYNETNIT		42	I (93)	91	2	-
		........N	T68N		Ma (5)	-	-	5
		......S..	N66S		U (2)	2	-	-
NA	79 - 87	ERTSRNFNN		42	I (93)	85.82	2.39	4.77
		....K....	R83K		Ma (7)	7.15	-	-
NA	149 - 157	TIHDRSQYR		44	I (98)	90.99	2.28	4.55
		....K....	R153K		U (2)	2.28	-	-
NA	207 - 215	VWYNRRPVA		44	I (98)	90.99	2.28	4.55
		....K....	R211K		U (2)	2.28	-	-
NA	237 - 245	GVCPVVFTD		55	I (98)	92.79	1.82	3.64
		....I....	V241I		U (2)	1.82	-	-
NA	261 - 269	EGKILKWES		55	I (96)	93	-	4
		.....E...	K266E		U (2)	2	-	-
		...V.....	I264V		U (2)	-	2	-
NA	290 - 298	TCTCRDNWQ		56	I (88)	85.78	1.79	-
		....K....	*R294K		Ma (13)	8.93	-	3.58
NA	323 - 331	VLTDNPRPN		47	I (98)	91.54	2.13	4.26
		....T....	N327T		U (2)	2.13	-	-
NA	342 - 350	YPGNNNNGV		47	I (79)	72.39	2.13	4.26
		....D....	N346D		U (2)	2.13	-	-
NA	363 - 371	LGRTISTAS		47	I (98)	91.55	2.13	4.26
		....T....	I367T		U (2)	2.13	-	-
NA	437 - 445	KVWWTSNSI		42	I (98)	90.58	2.39	4.77
		..L..GD..	W439L, S442G, N443D		U (2)	2.39	-	-
NA	461 - 469	PDGAKIEYF		39	I (98)	92.38	2.57	2.57
		....R....	K465R		U (3)	2.57	-	-
M1	121 - 129	TGALASCMG		38	I (97)	89.56	2.64	5.27
		....T....	A125T		U (3)	2.64	-	-
M2	15 - 23	WECNCSGSS		38	I (97)	90	3	5	K18N, D24E
		.....N...	^S20N		U (3)	3	-	-
M2	23 - 31	SEPLVVAAN		38	I (66)	63.24	2.64	-	I28V
		....A....	^V27A		U (3)	2.64	-	-
M2	29 - 37	AANIIGILH		38	I (97)	90	3	5	S31N
		....V....	^I33V		U (3)	3	-	-
M2	34 - 42	GILHLILWI		38	I (97)	89.56	2.64	5.27
		....M....	L38M		U (3)	2.64	-	-
M2	46 - 54	LFFKCIYRR		38	I (97)	89.56	2.64	5.27	L55F
		....Y....	^C50Y		U (3)	2.64	-	-
M2	89 - 97	GHFVNIELK		35	I (97)	94.34	-	2.86	E97K
		......D..	^E95D		U (3)	2.86	-	-
NS1	16 - 24	WHVRKRFAD		38	I (90)	84.29	-	5.27	L27M
		....R....	^K20R		U (3)	-	2.64	-
NS1	30 - 38	APFLDRLRR		38	I (87)	79.04	2.64	5.27
		.....P...	*R35P		Ma (11)	11	-	-
		...I.....	L33I		U (3)	3	-	-
NS1	45 - 53	GRSSTLGLD		38	I (97)	89.56	2.64	5.27	G47S, E55R
		....A....	^T49A		U (3)	2.64	-	-
NS1	57 - 65	ATREGKHIV		38	I (92)	84	3	5
		..H......	^R59H		Ma (5)	5	-	-	A60E
		......N..	#H63N		U (3)	3	-	-	Q63H
NS1	70 - 78	EEESDEAFK		38	I (95)	87	3	5	L77F
		....G....	^D74G		U (3)	2.64	-	-
		....N....	^D74N		U (3)	2.64	-	-
NS1	76 - 84	AFKMSIASV		38	I (76)	71	-	5	T80S
		....T....	#S80T		Ma (21)	18	3	-
NS1	86 - 94	APRYLTDMT		38	I (97)	89.56	2.64	5.27	S87P
		....I....	^L90I		U (3)	2.64	-	-
NS1	107 - 115	PKQKITGSL		38	I (79)	74	-	5	M106I, V111I, A112T
		....V....	#I111V		Ma (21)	18	3	-
NS1	164 - 172	PSLPGHTDK		38	I (92)	84	3	5
		..P......	^L166P		U (3)	3	-	-
		........Q	#K172Q		U (3)	3	-	-	E172K
		......I..	^T170I		U (3)	3	-	-
NS1	173 - 181	DVKNAIEIL		38	I (95)	87	3	5	G179E, V180I
		...S.....	^N176S		U (3)	3	-	-
NS1	200 - 208	RFAWRSSDE		38	I (95)	87	3	5	N207D
		.....NG..	^S205N, ^S206G		U (3)	3	-	-
NS1	208 - 216	EDGRSPLST		38	I (66)	60.6	-	5.27	P212S, P215S, P216T
		....P...P	#S212P, #T216P		Ma (18)	16	3	-
		...GP...P	^R211G, #S212P, #T216P		U (3)	3	-	-
		.N.......	^D209N		U (3)	3	-	-
		......F..	^L214F		U (3)	3	-	-
NS2	15 - 23	RMSKMQLRS		38	I (95)	86.93	2.64	5.27	M14T, G22R
		....V....	^M19V		U (3)	2.64	-	-
NS2	23 - 31	SSSEDLNGM		38	I (95)	86.93	2.64	5.27
		....G....	^D27G		Ma (5)	5.27	-	-
NS2	42 - 50	RDSLGEAAM		38	I (95)	86.93	2.64	5.27	V49A
		..L......	^S44L		U (3)	2.64	-	-
		......T..	^A48T		U (3)	2.64	-	-
NS2	88 - 96	KITENSFEQ		38	I (97)	89.56	2.64	5.27
		....T....	N92T		U (3)	2.64	-	-
NS2	105 - 113	LLLEVEQEI		37	I (97)	89.29	2.71	5.41
		..P...V..	L107P, Q111V		U (3)	2.71	-	-
NS2	113 - 121	IRTFSFQLI		35	I (97)	94.34	2.86	-
		.....V..N	F118V, I121N		U (3)	2.86	-	-
a HA protein sequence numeration is based on H7N9 HA protein sequence alignment for consistency with other proteins. However, the literature generally uses H7 numeration without the 18 amino acids of the signal peptide. Thus, in order to correspond our position numbers to H7 numeration, 18aa of the signal peptide needs to be subtracted. Additionally, the nonamer sequences provided would help prov…
