# Supplementary material for: Avian Influenza H7N9 Virus Adaptation to Human Hosts
Source: Viruses. 2021 May 10;13(5):871. doi: 10.3390/v13050871 (PMC8150935; doi:10.3390/v13050871)
Supplement: Supplementary file 1 [file viruses-13-00871-s001.zip › SUPPLEMENTARY TABLE 7.xlsx]

## Sheet: Avian&HumanStrains
A) Avian strains (full-length)
Strain Namea/ Accession no.b	A2H Substitutionc
	PB2							PB1													PA															PAX								HA					NP
	191	292	389	559	570	648	676	14	48	113	172	257	368	383	387	430	525	573	628	638	37	61	63	100	262	337	356	388	394	409	423	554	607	684	716	37	61	63	100	194	195	199	248	65	235	427	455	462	34
	E	I	R	T	I	L	T	A	Q	V	E	T	I	E	K	R	I	S	L	E	A	I	V	V	K	A	K	S	D	S	I	I	M	G	K	A	I	V	V	P	R	R	K	K	Q	M	N	R	G
A/turkey/Minnesota/1/1988	E	I	R	T	M	L	T	A	Q	V	E	T	I	E	K	K	I	S	L	E	A	I	V	V	K	A	K	S	D	S	I	I	M	G	K	A	I	V	V	P	K	R	K	K	L	I	D	K	G
A/ruddy_turnstone/Delaware_Bay/220/1995	E	I	R	T	M	L	T	A	Q	V	E	T	I	E	K	K	I	S	L	E	A	I	V	V	K	A	K	S	D	S	I	I	M	G	K	A	I	V	V	P	K	R	K	K	L	I	D	K	G
A/ruddy_turnstone/Delaware/AI00_1538/2000	E	I	R	T	M	L	T	A	Q	V	E	T	I	E	K	K	I	S	L	E	A	I	V	V	K	A	K	S	D	S	I	I	M	G	K	A	I	V	V	P	R	R	K	K	L	I	D	K	G
A/mallard/Sweden/1621/2002	E	I	R	T	M	L	T	A	Q	I	E	T	I	E	K	K	I	S	L	E	A	I	V	V	K	A	K	S	D	S	I	I	M	G	K	A	I	V	V	P	R	R	K	K	L	I	D	K	G
A/mallard/Sweden/91/2002	E	I	R	T	M	L	T	A	Q	V	E	T	I	E	K	K	I	S	L	E	A	I	V	V	K	A	K	S	D	S	I	I	M	G	K	A	I	V	V	P	R	R	K	K	L	I	D	K	G
A/mallard/Alberta/177/2004	E	I	R	T	M	L	T	A	Q	V	E	T	I	E	K	K	I	S	L	E	A	I	V	V	K	A	K	S	D	S	I	I	M	G	K	A	I	V	V	P	R	R	K	K	L	I	D	K	G
A/blue_winged_teal/Ohio/566/2006	E	I	R	T	M	L	T	A	Q	V	E	T	I	E	K	K	I	S	L	E	A	I	V	V	K	A	K	S	D	S	I	I	M	G	K	A	I	V	V	P	R	R	K	R	Q	M	N	R	G
A/emperor_goose/Alaska/44063_061/2006	E	-	-	-	-	-	-	A	Q	V	E	T	I	E	K	K	I	S	L	E	A	I	V	V	K	A	K	G	D	S	I	I	M	G	K	A	I	V	V	P	K	K	K	K	L	I	D	K	G
A/Anas_crecca/Spain/1460/2008	E	I	R	T	M	L	T	A	Q	V	E	T	I	E	K	K	I	S	L	E	A	I	V	V	K	A	K	S	D	S	I	I	M	G	K	A	I	V	V	P	R	R	K	R	Q	I	N	K	G
A/blue_winged_teal/Guatemala/CIP049_01/2008	E	I	R	T	M	L	T	A	Q	V	E	T	I	E	K	K	I	S	L	E	A	I	V	V	K	A	K	S	D	S	I	I	M	G	K	A	I	V	V	P	R	R	K	R	Q	M	N	R	G
A/blue_winged_teal/Guatemala/CIP049_02/2008	E	I	R	T	M	L	T	A	Q	V	E	T	I	E	K	K	I	S	L	E	A	I	V	V	K	A	K	S	D	S	I	I	M	G	K	A	I	V	V	P	R	R	K	R	Q	M	N	R	G
A/wild_duck/Korea/SH20_27/2008	E	I	R	T	M	L	T	A	Q	V	E	T	I	E	K	K	I	S	L	E	A	I	V	V	K	A	K	S	D	S	I	I	M	G	K	A	I	V	V	P	R	R	K	K	L	I	D	K	G
A/duck/Jiangxi/3096/2009	E	I	R	T	M	L	T	A	Q	V	E	T	I	E	K	K	I	S	L	E	A	I	V	V	K	A	K	S	D	S	I	I	M	G	K	A	I	V	V	P	R	R	K	K	L	I	D	K	G
A/duck/Jiangxi/3141/2009	E	I	R	T	M	L	T	A	Q	V	E	T	I	E	K	K	I	S	L	E	A	I	V	V	K	A	K	S	D	S	I	I	M	G	K	A	I	V	V	P	R	R	K	K	L	I	D	K	G
A/duck/Jiangxi/3152/2009	E	I	R	T	M	L	T	A	Q	V	E	T	I	E	K	K	I	S	L	E	A	I	V	V	K	A	K	S	D	S	I	I	M	G	K	A	I	V	V	P	R	R	K	K	L	I	D	K	G
A/duck/Jiangxi/3169/2009	E	I	R	T	M	L	T	A	Q	V	E	T	I	E	K	K	I	S	L	E	A	I	V	V	K	A	K	S	D	S	I	I	M	G	K	A	I	V	V	P	R	R	K	K	L	I	D	K	G
A/duck/Jiangxi/3190/2009	E	I	R	T	M	L	T	A	Q	V	E	T	I	E	K	K	I	S	L	E	A	I	V	V	K	A	K	S	D	S	I	I	M	G	K	A	I	V	V	P	R	R	K	K	L	I	D	K	G
A/duck/Jiangxi/3214/2009	E	I	R	T	M	L	T	A	Q	V	E	T	I	E	K	K	I	S	L	E	A	I	V	V	K	A	K	S	D	S	I	I	M	G	K	A	I	V	V	P	R	R	K	K	L	I	D	K	G
A/duck/Jiangxi/3230/2009	E	I	R	T	M	L	T	A	Q	V	E	T	I	E	K	K	I	S	L	E	A	I	V	V	K	A	K	S	D	S	I	I	M	G	K	A	I	V	V	P	R	R	K	K	L	I	D	K	G
A/duck/Jiangxi/3257/2009	E	I	R	T	M	L	T	A	Q	V	E	T	I	E	K	K	I	S	L	E	A	I	V	V	K	A	K	S	D	S	I	I	M	G	K	A	I	V	V	P	R	R	K	K	L	I	D	K	G
A/duck/Jiangxi/3283/2009	E	I	R	T	M	L	T	A	Q	V	E	T	I	E	K	K	I	S	L	E	A	I	V	V	K	A	K	S	D	S	I	I	M	G	K	A	I	V	V	P	R	R	K	K	L	I	D	K	G
A/duck/Jiangxi/3286/2009	E	I	R	T	M	L	T	A	Q	V	E	T	I	E	K	K	I	S	L	E	A	I	V	V	K	A	K	S	D	S	I	I	M	G	K	A	I	V	V	P	R	R	K	K	L	I	D	K	G
A/duck/Jiangxi/3292/2009	E	I	R	T	M	L	T	A	Q	V	E	T	I	E	K	K	I	S	L	E	A	I	V	V	K	A	K	S	D	S	I	I	M	G	K	A	I	V	V	P	R	R	K	K	L	I	D	K	G
A/goose/Czech_Republic/1848_K9/2009	E	V	R	T	M	L	T	A	Q	V	E	T	I	E	K	K	I	S	L	E	A	I	V	V	K	A	K	S	D	S	I	I	M	G	K	A	I	V	V	P	R	R	K	K	L	I	D	K	G
A/goose/Czech_Republic/1848_T14/2009	E	V	R	T	M	L	T	A	Q	V	E	T	I	E	K	K	I	S	L	E	A	I	V	V	K	A	K	S	D	S	I	I	M	G	K	A	I	V	V	P	R	R	K	K	L	I	D	K	G
A/mallard/MN/AI09_3770/2009	E	I	R	T	M	L	T	A	Q	V	E	T	V	E	K	K	I	S	L	E	A	I	V	V	K	A	K	S	D	S	I	I	M	G	K	A	I	V	V	P	R	R	K	K	L	I	D	K	G
A/turkey/Minnesota/14135_2/2009	E	I	R	T	M	L	T	-	Q	V	E	-	-	-	-	-	-	-	-	-	A	I	V	V	K	A	K	G	D	S	I	I	M	G	K	A	I	V	V	P	K	R	-	K	L	I	D	K	G
A/turkey/Minnesota/20400/2009	-	-	-	-	-	-	-	-	Q	V	E	-	-	-	-	-	-	-	-	-	A	I	V	V	-	-	-	-	-	-	-	-	-	-	-	A	I	V	V	P	K	R	-	K	L	I	D	K	G
A/turkey/Minnesota/31676/2009	E	I	R	T	M	L	T	-	Q	V	E	-	-	-	-	-	-	-	-	-	A	I	V	V	K	A	K	G	D	S	I	I	M	G	K	A	I	V	V	P	K	R	-	K	L	I	D	K	G
A/wild_duck/Korea/SH19_27/2010	E	I	R	T	M	L	T	A	Q	V	E	T	I	E	K	K	I	S	L	E	A	I	V	V	K	A	K	S	D	S	I	I	M	G	K	A	I	V	V	P	R	R	K	K	L	I	D	K	G
A/wild_duck/Korea/SH19_44/2010	E	I	R	T	M	L	T	A	Q	V	E	-	-	-	-	-	-	-	-	-	A	I	V	V	K	A	K	S	D	S	I	I	M	G	K	A	I	V	V	P	R	R	K	K	L	I	D	K	G
A/wild_duck/Korea/SH19_47/2010	E	I	R	T	M	L	T	A	Q	V	E	T	I	E	K	K	I	S	L	E	A	I	V	V	K	A	K	S	D	S	I	I	M	G	K	A	I	V	V	P	R	R	K	K	L	I	D	K	G
A/wild_duck/Korea/SH19_50/2010	E	-	-	-	-	-	-	A	Q	V	E	T	I	E	K	K	I	S	L	E	A	I	V	V	K	A	K	S	D	S	I	I	M	G	K	A	I	V	V	P	R	R	K	K	L	I	D	K	G
A/guinea_fowl/Nebraska/17096/2011	E	I	R	T	M	L	T	-	Q	V	E	-	-	-	-	-	-	-	-	-	A	I	V	V	K	A	K	G	D	S	I	I	M	G	K	A	I	V	V	P	K	R	K	K	L	I	D	K	G
A/northern_shoverl/Mississippi/11OS145/2011	E	I	R	T	M	L	T	A	Q	V	E	T	I	E	K	K	I	S	L	E	A	I	V	V	K	A	K	S	D	S	I	I	M	G	K	A	I	V	V	P	R	R	K	K	L	I	D	K	G
A/turkey/Minnesota/32710/2011	E	I	R	T	M	L	T	-	Q	V	E	-	-	-	-	-	-	-	-	-	A	I	V	V	K	A	K	G	D	S	I	I	M	G	K	A	I	V	V	P	K	R	K	K	L	I	D	K	G
A/wild_duck/Korea/CSM42_1/2011	E	I	R	T	M	L	T	A	Q	V	E	T	I	E	K	K	I	S	L	E	A	I	V	V	K	A	K	S	D	S	I	I	M	G	-	A	I	V	V	P	R	R	K	K	L	I	D	K	G
A/wild_duck/Korea/CSM42_34/2011	E	I	R	T	M	L	T	A	Q	V	E	T	I	E	K	K	I	S	L	E	A	I	V	V	K	A	K	S	D	S	I	I	M	-	-	A	I	V	V	P	R	R	K	K	L	I	D	K	G
A/wild_duck/Korea/MHC35_25/2011	E	I	R	T	M	L	T	A	Q	V	E	T	I	E	K	K	I	S	L	E	A	I	V	V	K	A	K	S	D	S	I	I	M	G	K	A	I	V	V	P	R	R	K	K	L	I	D	K	G
A/wild_duck/Korea/MHC35_41/2011	E	I	R	T	M	L	T	A	Q	V	E	T	I	E	K	K	I	S	L	E	A	I	V	V	K	A	K	S	D	S	I	I	M	G	K	A	I	V	V	P	R	R	K	K	L	I	D	K	G
A/wild_duck/Korea/MHC39_13/2011	E	I	R	T	M	L	T	A	Q	V	E	T	I	E	K	K	I	S	L	E	A	I	V	V	K	A	K	S	D	S	I	I	M	G	-	A	I	V	V	P	R	R	K	K	L	I	D	K	G
A/wild_duck/Korea/MHC39_26/2011	E	I	R	T	M	L	T	A	Q	V	E	T	I	E	K	K	I	S	L	E	A	I	V	V	K	A	K	S	D	S	I	I	M	G	-	A	I	V	V	P	R	R	K	K	L	I	D	K	G
THE FIRST HUMAN STRAIN ISOLATED (2013)
A/chicken/Dongguan/2912/2013	E	V	K	T	I	V	V	V	K	I	D	A	V	K	E	K	I	A	M	D	S	I	I	V	R	T	K	N	D	N	V	V	L	E	R	S	T	I	V	P	K	K	K	R	Q	M	N	R	S
A/chicken/Dongguan/3112/2013	E	V	K	T	I	V	V	V	K	I	D	A	V	K	E	K	I	A	M	D	S	I	I	V	R	T	K	N	D	N	V	V	L	E	R	S	T	I	V	P	K	K	K	R	Q	M	N	R	S
A/chicken/Dongguan/3141/2013	E	V	K	T	I	V	V	V	K	I	D	A	V	K	E	K	I	A	M	D	S	I	I	V	R	T	K	N	D	N	V	V	L	E	R	S	T	I	V	P	K	K	K	R	Q	M	N	R	S
A/chicken/Dongguan/3145/2013	E	V	K	T	I	V	V	V	K	I	D	A	V	K	E	K	I	A	M	D	S	I	I	A	R	T	R	N	N	N	V	V	L	E	R	S	T	I	A	L	K	K	R	R	Q	M	N	R	S
A/chicken/Dongguan/3146/2013	E	V	K	T	I	V	V	V	K	I	D	A	V	K	E	K	I	A	M	D	S	I	I	V	R	T	K	N	D	N	V	V	L	E	R	S	T	I	V	P	K	K	K	R	Q	M	N	R	S
A/chicken/Dongguan/3219/2013	E	V	K	T	I	V	V	V	K	I	D	A	V	K	E	K	I	A	M	D	S	I	I	A	R	T	R	N	N	N	V	V	L	E	R	S	T	I	A	L	K	K	R	R	Q	M	N	R	S
A/chicken/Dongguan/3418/2013	E	V	K	T	I	V	V	V	K	I	D	A	V	K	E	K	I	A	M	D	S	I	I	V	R	T	K	N	D	N	V	V	L	E	R	S	T	I	V	P	K	K	K	R	Q	M	N	R	S
A/chicken/Dongguan/3438/2013	E	V	K	T	I	V	V	V	K	I	D	A	V	K	E	K	I	A	M	D	S	I	I	X	R	T	X	N	B	N	V	V	L	E	R	S	T	I	X	X	K	K	X	R	Q	M	N	R	S
A/chicken/Dongguan/3464/2013	E	V	K	T	I	V	V	V	K	I	D	A	V	K	E	K	I	A	M	D	S	I	I	V	R	T	K	N	D	N	V	V	L	E	R	S	T	I	V	P	K	K	K	R	Q	M	N	R	S
A/chicken/Dongguan/3487/2013	E	V	K	T	I	V	V	V	K	I	D	A	V	K	E	K	I	A	M	D	S	I	I	A	R	T	R	N	N	N	V	V	L	E	R	S	T	I	A	L	K	K	R	R	Q	M	N	R	S
A/chicken/Dongguan/3488/2013	E	V	K	T	I	V	V	V	K	I	D	A	V	K	E	K	I	A	M	D	S	I	I	V	R	T	K	N	D	N	V	V	L	E	R	S	T	I	V	P	K	K	K	R	Q	M	N	R	S
A/chicken/Dongguan/3491/2013	E	V	K	T	I	V	V	V	K	I	D	A	V	K	E	K	I	A	M	D	S	I	I	V	R	T	K	N	D	N	V	V	L	E	R	S	T	I	V	P	K	K	K	R	Q	M	N	R	S
A/chicken/Dongguan/3544/2013	E	V	K	T	I	V	V	V	K	I	D	A	I	K	E	K	I	A	M	D	S	I	I	A	R	T	R	N	N	N	V	V	L	E	R	S	T	I	A	L	K	K	R	R	Q	M	N	K	S
A/chicken/Dongguan/3563/2013	E	V	K	T	I	V	V	V	K	I	D	A	I	K	E	K	I	A	M	D	S	I	I	A	R	T	R	N	N	N	V	V	L	E	R	S	T	I	A	L	K	K	R	R	Q	M	N	K	S
A/chicken/Dongguan/3582/2013	E	V	K	T	I	V	V	V	K	I	D	A	I	K	E	K	I	A	M	D	S	I	I	A	R	T	R	N	N	N	V	V	L	E	R	S	T	I	A	L	K	K	R	R	Q	M	N	K	S
A/chicken/Dongguan/3894/2013	E	V	K	T	I	V	V	V	K	I	D	A	V	K	E	K	I	A	M	D	S	I	I	V	R	T	K	N	D	N	V	V	L	E	R	S	T	I	V	P	K	K	K	R	Q	M	N	K	S
A/chicken/Dongguan/3917/2013	E	V	K	T	I	V	V	V	K	I	D	A	V	K	E	K	I	A	M	D	S	I	I	A	R	T	R	N	N	N	V	V	L	E	R	S	T	I	A	L	K	K	R	R	L	I	D	K	S
A/chicken/Dongguan/3935/2013	E	V	K	T	I	V	V	V	K	I	D	A	V	K	E	K	I	A	M	D	S	I	I	V	R	T	K	N	D	N	V	V	L	E	R	S	T	I	V	P	K	K	K	R	Q	-	-	-	S
A/chicken/Dongguan/3945/2013	E	V	K	T	I	V	V	V	K	I	D	A	V	K	E	K	I	A	M	D	S	I	I	A	R	T	R	N	N	N	V	V	L	E	R	S	T	I	A	L	K	K	R	R	Q	M	N	K	S
A/chicken/Dongguan/3972/2013	E	V	K	T	I	V	V	V	K	I	D	A	V	K	E	K	I	A	M	D	S	I	I	A	R	T	R	N	N	N	V	V	L	E	R	S	T	I	A	L	K	K	R	R	Q	M	N	R	S
A/chicken/Dongguan/4037/2013	E	V	K	T	I	V	V	V	K	I	D	A	V	K	E	K	I	A	M	D	S	I	I	A	R	T	R	N	N	N	V	V	L	E	R	S	T	I	A	L	K	K	R	R	Q	M	N	R	S
A/chicken/Dongguan/4040/2013	E	V	K	T	I	V	V	V	K	I	D	A	V	K	E	K	I	A	M	D	S	I	I	A	R	T	R	N	N	N	V	V	L	E	R	S	T	I	A	L	K	K	R	R	Q	M	N	R	S
A/chicken/Dongguan/4048/2013	E	V	K	T	I	V	V	V	K	I	D	A	V	K	E	K	I	A	M	D	S	I	I	X	R	T	R	N	B	X	V	V	L	E	R	S	T	I	X	L	K	K	X	R	Q	M	N	R	S
A/chicken/Dongguan/4063/2013	E	V	K	T	I	V	V	V	K	I	D	A	V	K	E	K	I	A	M	D	S	I	I	A	R	T	R	N	N	N	V	V	L	E	R	S	T	I	A	L	K	K	R	R	Q	I	D	K	S
A/chicken/Dongguan/4064/2013	E	V	K	T	I	V	V	V	K	I	D	A	V	K	E	K	I	A	M	D	S	I	I	A	R	T	R	N	N	N	V	V	L	E	R	S	T	I	A	L	K	K	R	-	-	-	-	-	S
A/chicken/Dongguan/4094/2013	E	V	K	T	I	V	V	V	K	I	D	A	V	K	E	K	I	A	M	D	S	I	I	A	R	T	R	N	N	N	V	V	L	E	R	S	T	I	A	L	K	K	R	R	Q	M	N	R	S
A/chicken/Dongguan/4102/2013	E	V	K	T	I	V	V	V	K	I	D	A	V	K	E	K	I	A	M	D	S	I	I	A	R	T	R	N	N	N	V	V	L	E	R	S	T	I	A	L	K	K	R	R	Q	-	-	-	S
A/chicken/Dongguan/4114/2013	E	V	K	T	I	V	V	V	K	I	D	A	V	K	E	K	I	A	M	D	S	I	I	A	R	T	R	N	N	N	V	V	L	E	R	S	T	I	A	L	K	K	R	R	Q	M	N	R	S
A/chicken/Dongguan/4119/2013	E	V	K	T	I	V	V	V	K	I	D	A	V	K	E	K	I	A	M	D	S	I	I	A	R	T	R	N	N	N	V	V	L	E	R	S	T	I	A	L	K	K	R	R	L	I	D	K	S
A/chicken/Dongguan/4195/2013	E	V	K	T	I	V	V	V	K	I	D	A	V	K	E	K	I	A	M	D	S	I	I	V	R	T	K	N	D	N	V	V	L	E	R	S	T	I	V	P	K	K	K	R	L	I	D	K	S
A/chicken/Dongguan/4251/2013	E	V	K	T	I	V	V	V	K	I	D	A	V	K	E	K	I	A	M	D	S	I	I	V	R	T	K	N	D	N	V	V	L	E	R	S	T	I	V	P	K	K	K	R	L	I	D	K	S
A/chicken/Guangdong/3135/2013	K	V	K	N	M	V	M	V	K	I	D	A	V	K	E	K	V	A	M	D	S	I	I	A	-	-	-	-	-	-	-	-	-	-	-	S	T	I	A	S	E	E	R	R	Q	M	N	R	S
A/chicken/Guangdong/3640/2013	K	V	K	N	M	V	M	V	K	I	D	A	V	K	E	K	V	A	M	D	S	I	I	A	-	-	-	-	-	-	-	-	-	-	-	S	T	I	A	S	E	E	R	R	Q	M	N	R	S
A/chicken/Guangdong/G1/2013	K	V	K	N	M	V	M	V	K	I	D	A	V	K	E	K	V	A	M	D	S	I	I	A	R	T	R	N	N	N	V	V	L	E	R	S	T	I	A	L	K	K	R	R	Q	M	N	R	S
A/chicken/Guangdong/G2/2013	K	V	K	N	M	V	M	V	K	I	D	A	V	K	E	K	V	A	M	D	S	I	I	A	-	-	-	-	-	-	-	-	-	-	-	S	T	I	A	S	E	E	R	R	Q	-	-	-	S
A/chicken/Guangdong/G3/2013	K	V	K	N	M	V	M	V	K	I	D	A	V	K	E	K	V	A	M	D	S	I	I	A	R	T	R	N	N	N	V	V	L	E	R	S	T	I	A	L	K	K	R	R	Q	-	-	-	S
A/chicken/Guangdong/SD1/2013	K	V	K	N	M	V	M	V	K	I	D	A	V	K	E	K	V	A	M	D	S	I	I	A	-	-	-	-	-	-	-	-	-	-	-	S	T	I	A	S	E	E	R	K	Q	I	D	K	S
A/chicken/Guangdong/SD641/2013	K	V	K	N	M	V	M	V	K	I	D	A	V	K	E	K	V	A	M	D	S	I	I	A	R	T	R	N	N	N	V	V	L	E	R	S	T	I	A	L	K	K	R	R	L	I	D	K	S
A/chicken/Hangzhou/174/2013	K	V	K	N	M	V	M	V	K	I	D	A	I	K	E	K	V	A	M	D	S	I	I	A	R	T	R	N	N	N	V	V	L	E	R	S	T	I	A	L	K	K	R	R	L	I	D	K	S
A/chicken/Henan/100/2013	K	-	-	-	-	-	-	V	K	I	D	-	-	-	-	-	-	-	-	-	S	T	I	A	-	-	-	-	-	-	-	-	-	-	-	S	T	I	A	L	K	K	R	R	L	I	D	K	S
A/chicken/Henan/102/2013	K	-	-	-	-	-	-	V	K	I	D	-	-	-	-	-	-	-	-	-	S	T	I	A	-	-	-	-	-	-	-	-	-	-	-	S	T	I	A	L	K	K	R	K	L	I	D	K	S
A/chicken/Henan/103/2013	K	-	-	-	-	-	-	-	K	I	D	-	-	-	-	-	-	-	-	-	S	T	I	A	-	-	-	-	-	-	-	-	-	-	-	S	T	I	A	L	K	K	R	K	L	I	D	K	S
A/chicken/Henan/106/2013	K	-	-	-	-	-	-	V	K	I	D	-	-	-	-	-	-	-	-	-	S	T	I	A	-	-	-	-	-	-	-	-	-	-	-	S	T	I	A	L	K	K	R	K	L	I	D	K	S
A/chicken/Henan/107/2013	K	-	-	-	-	-	-	V	K	I	D	-	-	-	-	-	-	-	-	-	S	T	I	A	R	T	R	N	N	N	V	V	L	E	R	S	T	I	A	L	K	K	R	K	L	I	D	K	S
A/chicken/Henan/109/2013	K	-	-	-	-	-	-	V	K	I	D	-	-	-	-	-	-	-	-	-	S	T	I	A	-	-	-	-	-	-	-	-	-	-	-	S	T	I	A	L	K	K	R	K	L	I	D	K	S
A/chicken/Henan/112/2013	K	-	-	-	-	-	-	V	K	I	D	-	-	-	-	-	-	-	-	-	S	T	I	A	-	-	-	-	-	-	-	-	-	-	-	S	T	I	A	L	K	K	R	K	L	I	D	K	S
A/chicken/Henan/114/2013	K	V	K	N	M	V	M	V	K	I	D	A	V	K	E	K	I	A	M	D	S	T	I	A	R	T	R	N	N	N	V	V	L	E	R	S	T	I	A	L	K	K	R	K	L	I	D	K	S
A/chicken/Henan/115/2013	K	-	-	-	-	-	-	V	K	I	D	A	V	K	E	K	I	A	M	D	S	T	I	A	R	T	R	N	N	N	V	V	L	E	R	S	T	I	A	L	K	K	R	R	I	I	D	K	S
A/chicken/Henan/117/2013	K	-	-	-	-	-	-	V	K	I	D	A	V	K	E	K	I	A	M	D	S	T	I	A	R	T	R	N	N	N	V	V	L	E	R	S	T	I	A	L	K	K	R	R	L	I	D	K	S
A/chicken/Henan/120/2013	K	-	-	-	-	-	-	V	K	I	D	-	-	-	-	-	-	-	-	-	S	T	I	A	-	-	-	-	-	-	-	-	-	-	-	S	T	I	A	L	K	K	R	M	L	I	D	K	S
A/chicken/Henan/141/2013	K	V	K	N	M	V	M	V	K	I	D	-	-	-	-	-	-	-	-	-	S	T	I	V	-	-	-	-	-	-	-	-	-	-	-	S	T	I	V	P	K	K	K	R	L	I	D	K	S
A/chicken/Henan/89/2013	E	-	-	-	-	-	-	V	Q	I	E	E	-	-	-	-	-	-	-	-	S	T	I	V	-	-	-	-	-	-	-	-	-	-	-	S	T	I	V	P	K	K	K	K	L	I	D	K	S
A/chicken/Henan/93/2013	K	-	-	-	-	-	-	V	K	I	D	-	-	-	-	-	-	-	-	-	S	T	I	A	R	T	R	N	N	N	V	V	L	E	R	S	T	I	A	L	K	K	R	M	L	I	D	K	S
A/chicken/Henan/96/2013	K	V	K	N	M	V	M	V	K	I	D	-	-	-	-	-	-	-	-	-	S	T	I	A	-	-	-	-	-	-	-	-	-	-	-	S	T	I	A	L	K	K	R	M	L	I	D	K	S
A/chicken/Henan/97/2013	K	-	-	-	-	-	-	V	K	I	D	A	V	K	E	K	I	A	M	D	S	T	I	A	-	-	-	-	-	-	-	-	-	-	-	S	T	I	A	L	K	K	R	M	L	I	D	K	S
A/chicken/Henan/99/2013	K	-	-	-	-	-	-	V	K	I	D	A	V	K	E	K	I	A	M	D	S	T	I	A	R	T	R	N	N	N	V	V	L	E	R	S	T	I	A	L	K	K	R	R	L	I	D	K	S
A/chicken/Henan/F246/2013	K	-	-	-	-	-	-	V	K	I	D	A	V	K	E	K	I	A	M	D	S	T	I	A	R	T	R	N	N	N	V	V	L	E	R	S	T	I	A	L	K	K	R	M	L	I	D	K	S
A/chicken/Henan/F248/2013	K	-	-	-	-	-	-	V	K	I	D	-	-	-	-	-	-	-	-	-	S	T	I	A	-	-	-	-	-	-	-	-	-	-	-	S	T	I	A	L	K	K	R	M	L	I	D	K	S
A/chicken/Huzhou/3765/2013	E	V	K	T	I	V	M	V	K	I	D	A	V	K	E	K	V	A	M	D	S	T	I	A	R	T	R	N	N	N	V	V	L	E	R	S	T	I	A	P	K	K	R	K	L	I	D	K	S
A/chicken/Huzhou/3791/2013	E	V	K	T	I	V	M	V	K	I	D	A	V	K	E	K	V	A	M	D	S	T	I	A	R	T	R	N	N	N	V	V	L	E	R	S	T	I	A	P	K	K	R	R	L	I	D	K	S
A/chicken/Huzhou/3802/2013	E	V	K	T	I	V	M	V	K	I	D	A	V	K	E	K	V	A	M	D	S	T	I	A	R	T	R	N	N	N	V	V	L	E	R	S	T	I	A	P	K	K	R	-	-	I	D	K	S
A/chicken/Huzhou/4045/2013	E	V	K	T	I	V	M	V	K	I	D	A	V	K	E	K	V	A	M	D	S	T	I	A	R	T	R	K	N	N	V	V	L	E	R	S	T	I	A	L	K	K	R	-	-	I	D	K	S
A/chicken/Huzhou/4067/2013	E	V	K	T	I	V	M	V	K	I	D	A	V	K	E	K	V	A	M	D	S	T	I	A	R	T	R	N	N	N	V	V	L	E	R	S	T	I	A	P	K	K	R	R	L	I	D	K	S
A/chicken/Huzhou/4073/2013	E	V	K	T	I	V	M	V	K	I	D	A	V	K	E	K	V	A	M	D	S	T	I	A	R	T	R	N	N	N	V	V	L	E	R	S	T	I	A	P	K	K	R	-	-	I	D	K	S
A/chicken/Huzhou/4074/2013	E	V	K	T	I	V	M	V	K	I	D	A	V	K	E	K	V	A	M	D	S	T	I	A	R	T	R	N	N	N	V	V	L	E	R	S	T	I	A	P	K	K	R	-	-	-	-	-	S
A/chicken/Huzhou/4076/2013	E	V	K	T	I	V	M	V	K	I	D	A	V	K	E	K	V	A	M	D	S	T	I	A	R	T	R	N	N	N	V	V	L	E	R	S	T	I	A	P	K	K	R	-	-	-	-	-	S
A/chicken/Huzhou/4083/2013	E	V	K	T	I	V	M	V	K	I	D	A	V	K	E	K	V	A	M	D	S	T	I	A	R	T	R	N	N	N	V	V	L	E	R	S	T	I	A	P	K	K	R	-	-	-	-	-	S
A/chicken/Huzhou/4141/2013	E	V	K	T	I	V	M	V	K	I	D	A	V	K	E	K	V	A	M	D	S	T	I	A	R	T	R	N	N	N	V	V	L	E	R	S	T	I	A	P	K	K	R	-	-	I	D	K	S
A/chicken/Huzhou/4169/2013	E	V	K	T	I	V	M	V	K	I	D	A	V	K	E	K	V	A	M	D	S	T	I	A	R	T	R	N	N	N	V	V	L	E	R	S	T	I	A	P	K	K	R	R	L	I	D	K	S
A/chicken/Jiangsu/S002/2013	K	V	K	N	M	V	M	V	K	I	D	A	V	K	E	K	V	A	M	D	S	T	I	A	R	T	R	N	N	N	V	V	L	E	R	S	T	I	A	L	K	K	R	R	L	I	D	K	S
A/chicken/Jiangsu/SC035/2013	K	V	K	N	M	V	M	V	K	I	D	A	V	K	E	K	V	A	M	D	S	T	I	A	R	T	R	N	N	N	V	V	L	E	R	S	T	I	A	L	K	K	R	-	-	-	-	-	S
A/chicken/Jiangsu/SC099/2013	E	V	K	T	I	V	M	V	K	I	G	A	V	K	E	K	I	A	M	D	S	T	I	V	K	T	R	N	D	N	V	V	L	E	R	S	T	I	V	P	K	K	K	R	L	I	D	K	S
A/chicken/Jiangsu/SC537/2013	E	V	K	T	I	V	M	V	K	I	D	A	V	K	E	K	V	A	M	D	S	T	I	A	R	T	R	N	N	N	V	V	L	E	R	S	T	I	A	L	K	K	R	R	L	I	D	K	S
A/chicken/Jiangxi/12486/2013	K	V	K	N	M	V	M	V	K	I	D	A	V	K	E	K	I	A	M	D	S	T	I	A	R	T	R	N	N	N	V	V	L	E	R	S	T	I	A	L	K	K	R	R	L	I	D	K	S
A/chicken/Jiangxi/12492/2013	K	V	K	N	M	V	M	V	K	I	D	A	V	K	E	K	I	A	M	D	S	T	I	A	R	T	R	N	N	N	V	V	L	E	R	S	T	I	A	L	K	K	R	R	L	I	D	K	S
A/chicken/Jiangxi/12544/2013	K	V	K	N	M	V	M	V	K	I	D	A	V	K	E	K	I	A	M	D	S	T	I	A	R	T	R	N	N	N	V	V	L	E	R	S	T	I	A	L	K	K	R	R	L	I	D	K	S
A/chicken/Jiangxi/12554/2013	K	V	K	N	M	V	M	V	K	I	D	A	V	K	E	K	I	A	M	D	S	T	I	A	R	T	R	N	N	N	V	V	L	E	R	S	T	I	A	L	K	K	R	R	L	I	D	K	S
A/chicken/Jiangxi/12564/2013	K	V	K	N	M	V	M	V	K	I	D	A	V	K	E	K	I	A	M	D	S	T	I	V	X	T	R	N	B	N	V	V	L	E	R	S	T	I	V	X	K	K	X	M	L	I	D	K	S
A/chicken/Jiangxi/SD001/2013	E	V	K	T	M	V	M	V	K	I	D	A	V	K	E	K	I	A	M	D	S	T	I	A	R	T	R	N	N	N	V	V	L	E	R	S	T	I	A	L	K	K	R	X	Q	I	D	K	S
A/chicken/Jiaxing/4490/2013	E	V	K	T	I	V	M	V	K	I	D	A	V	K	E	K	V	A	M	D	S	T	I	A	R	T	R	N	N	N	V	V	L	E	R	S	T	I	A	L	K	K	R	K	L	I	D	K	S
A/chicken/Rizhao/515/2013	K	V	K	N	M	V	M	V	K	I	D	A	V	K	E	K	V	A	M	D	S	T	I	A	R	T	R	N	N	S	V	V	L	E	R	S	T	I	A	L	K	K	R	K	L	I	D	K	S
A/chicken/Rizhao/867/2013	K	V	K	N	M	V	M	V	K	I	D	A	V	K	E	K	V	A	M	D	S	T	I	A	R	T	R	N	N	N	V	V	L	E	R	S	T	I	A	L	K	K	R	R	L	I	D	K	S
A/chicken/Rizhao/871/2013	K	V	K	N	M	V	M	V	K	I	D	A	V	K	E	K	V	A	M	D	S	T	I	V	R	T	K	N	D	N	V	V	L	E	R	S	T	I	V	P	K	K	K	R	Q	I	D	K	S
A/chicken/Rizhao/875/2013	K	V	K	N	M	V	M	V	K	I	D	A	V	K	E	K	V	A	M	D	S	T	I	A	R	T	R	N	N	N	V	V	L	E	R	S	T	I	A	L	K	K	R	K	Q	I	D	K	S
A/chicken/Shanghai/017/2013	K	V	K	N	M	V	M	V	K	I	D	A	V	K	E	K	V	A	M	D	S	T	I	A	R	T	R	N	N	N	V	V	L	E	R	S	T	I	A	L	K	K	R	K	Q	I	D	K	S
A/chicken/Shanghai/019/2013	K	V	K	N	M	V	M	V	K	I	D	A	V	K	E	K	I	A	M	D	S	T	I	A	R	T	R	N	N	N	V	V	L	E	R	S	T	I	A	L	K	K	R	R	L	I	D	K	S
A/Chicken/Shanghai/S1053/2013	K	V	K	N	M	V	M	V	K	I	D	A	V	K	E	K	V	A	M	D	S	T	I	A	R	T	R	N	N	N	V	V	L	E	R	S	T	I	A	L	K	K	R	R	Q	I	D	K	S
A/chicken/Shanghai/S1055/2013	K	V	K	N	M	V	M	V	K	I	D	A	V	K	E	K	V	A	M	D	S	T	I	A	R	T	R	N	N	N	V	V	L	E	R	S	T	I	A	L	K	K	R	R	Q	I	D	K	S
A/chicken/Shanghai/S1076/2013	K	V	K	N	M	V	M	V	K	I	D	A	V	K	E	K	I	A	M	D	S	T	I	A	R	T	R	N	N	N	V	V	L	E	R	S	T	I	A	L	K	K	R	M	L	I	D	K	S
A/chicken/Shanghai/S1077/2013	K	V	K	N	M	V	M	V	K	I	D	A	V	K	E	K	I	A	M	D	S	T	I	A	R	T	R	N	N	N	V	V	L	E	R	S	T	I	A	L	K	K	R	K	Q	M	N	K	S
A/chicken/Shanghai/S1078/2013	K	V	K	N	M	V	M	V	K	I	D	A	V	K	E	K	I	A	M	D	S	T	I	A	R	T	R	N	N	N	V	V	L	E	R	S	T	I	A	L	K	K	R	K	L	I	D	K	S
A/chicken/Shanghai/S1079/2013	K	V	K	N	M	V	M	V	K	I	D	A	V	K	E	K	I	A	M	D	S	T	I	A	R	T	R	N	N	N	V	V	L	E	R	S	T	I	A	L	K	K	R	K	L	I	D	K	S
A/chicken/Shanghai/S1080/2013	K	V	K	T	M	V	M	V	K	I	D	A	V	K	E	K	I	S	M	D	S	T	I	V	R	T	R	N	N	N	V	V	L	E	R	S	T	I	V	P	K	K	K	K	L	I	D	K	S
A/chicken/Shanghai/S1358/2013	E	V	K	T	I	V	M	V	K	I	G	A	V	K	E	K	I	A	M	D	S	T	I	V	K	T	R	N	D	N	V	V	L	E	R	S	T	I	V	P	K	K	K	R	L	I	D	K	S
A/chicken/Shanghai/S1413/2013	K	V	K	N	M	V	M	V	K	I	D	A	V	K	E	K	V	A	M	D	S	T	I	A	R	T	R	N	D	N	V	V	L	E	R	S	T	I	A	L	K	K	R	R	L	I	D	K	S
A/chicken/Shaoxing/2417/2013	E	V	K	T	M	V	M	V	K	I	D	A	V	K	E	K	V	A	M	D	S	T	I	V	K	T	R	N	D	N	V	V	L	E	R	S	T	I	V	P	K	K	K	K	L	I	D	K	S
A/chicken/Shaoxing/5086/2013	E	V	K	T	I	V	M	V	K	I	D	A	V	K	E	K	V	A	M	D	S	T	I	A	R	T	R	N	N	N	V	V	L	E	R	S	T	I	A	L	K	K	R	K	L	I	D	K	S
A/chicken/Shaoxing/5087/2013	E	V	K	T	I	V	M	V	K	I	D	A	V	K	E	K	V	A	M	D	S	T	I	A	R	T	R	N	N	N	V	V	L	E	R	S	T	I	A	L	K	K	R	K	L	I	D	K	S
A/chicken/Shaoxing/5136/2013	E	V	K	T	M	V	M	V	K	I	D	A	V	K	E	K	V	A	M	D	S	T	I	V	K	T	R	N	D	N	V	V	L	E	R	S	T	I	V	P	K	K	K	K	L	I	D	K	S
A/chicken/Shaoxing/5146/2013	E	V	K	T	I	V	M	V	K	I	D	A	V	K	E	K	V	A	M	D	S	T	I	V	X	T	R	N	B	N	V	V	L	E	R	S	T	I	V	X	K	K	X	R	L	I	D	K	S
A/chicken/Shaoxing/5186/2013	E	V	K	T	I	V	M	V	K	I	D	A	V	K	E	K	V	A	M	D	S	T	I	A	R	T	R	N	N	N	V	L	L	E	R	S	T	I	A	P	K	K	R	R	L	I	D	K	S
A/chicken/Shaoxing/5201/2013	E	V	K	T	I	V	M	V	K	I	D	A	V	K	E	K	V	A	M	D	S	T	I	A	R	T	R	N	N	N	V	V	L	E	R	S	T	I	A	P	K	K	R	K	L	I	D	K	S
A/chicken/Shaoxing/5224/2013	E	V	K	T	I	V	M	V	K	I	D	A	V	K	E	K	V	A	M	D	S	T	I	A	R	T	R	N	N	N	V	V	L	E	R	S	T	I	A	L	K	K	R	K	L	I	D	K	G
A/chicken/Shaoxing/5227/2013	E	V	K	T	I	V	M	V	K	I	D	A	V	K	E	K	V	A	M	D	S	T	I	A	R	T	R	N	N	N	V	V	L	E	R	S	T	I	A	L	K	K	R	K	L	I	D	K	G
A/chicken/Shaoxing/5479/2013	E	V	K	T	I	V	M	V	K	I	D	A	V	K	E	K	V	A	M	D	S	T	I	A	R	T	R	N	N	N	V	V	L	G	R	S	T	I	A	L	K	K	R	K	L	I	D	K	S
A/chicken/Shenzhen/1665/2013	E	V	K	T	I	V	V	V	K	I	D	A	V	K	E	K	I	A	M	D	S	T	I	A	R	T	R	N	N	N	V	V	L	E	R	S	T	I	A	L	K	K	R	K	L	I	D	K	S
A/chicken/Shenzhen/2110/2013	E	V	K	T	M	V	M	V	K	I	D	A	V	K	E	K	I	A	M	D	S	T	I	A	R	T	R	N	N	N	V	V	L	E	R	S	T	I	A	L	K	K	R	K	L	I	D	K	S
A/chicken/Shenzhen/2201/2013	E	V	K	T	I	V	V	V	K	I	D	A	V	K	E	K	I	A	M	D	S	T	I	A	R	T	R	N	N	N	V	V	L	E	R	S	T	I	A	L	K	K	R	R	L	I	D	K	S
A/chicken/Shenzhen/2293/2013	E	V	K	T	I	V	V	V	K	I	D	A	V	K	E	K	I	A	M	D	S	T	I	A	R	T	R	N	N	N	V	V	L	E	R	S	T	I	A	L	K	K	R	R	L	I	D	K	S
A/chicken/Shenzhen/3733/2013	E	V	K	T	I	V	V	V	K	I	D	A	V	K	E	K	I	A	M	D	S	T	I	A	R	T	R	N	N	N	V	V	L	E	R	S	T	I	A	L	K	K	R	R	L	I	D	K	S
A/chicken/Shenzhen/3734/2013	E	V	K	T	I	V	V	V	K	I	D	A	V	K	E	K	I	A	M	D	S	T	I	A	R	T	R	N	N	N	V	V	L	E	R	S	T	I	A	L	K	K	R	R	L	I	D	K	S
A/chicken/Shenzhen/3780/2013	E	V	K	T	I	V	V	V	K	I	D	A	V	K	E	K	I	A	M	D	S	T	I	A	R	T	R	N	N	N	V	V	L	E	R	S	T	I	A	L	K	K	R	R	L	I	D	K	S
A/chicken/Shenzhen/727/2013	E	V	K	T	I	V	V	V	K	I	D	A	V	K	E	K	I	A	M	D	S	T	I	A	R	T	R	N	N	N	V	V	L	E	R	S	T	I	A	L	K	K	R	R	L	I	D	K	S
A/chicken/Shenzhen/742/2013	E	V	K	T	I	V	V	V	K	I	D	A	V	K	E	K	I	A	M	D	S	T	I	A	R	T	R	N	N	N	V	V	L	E	R	S	T	I	A	L	K	K	R	R	L	I	D	K	S
A/chicken/Shenzhen/747/2013	E	V	K	T	I	V	V	V	K	I	D	A	V	K	E	K	I	A	M	D	S	T	I	A	R	T	R	N	N	N	V	V	L	E	R	S	T	I	A	L	K	K	R	R	L	I	D	K	S
A/chicken/Shenzhen/749/2013	E	V	K	T	I	V	V	V	K	I	D	A	V	K	E	K	I	A	M	D	S	T	I	A	R	T	R	N	N	N	V	V	L	E	R	S	T	I	A	L	K	K	R	R	L	I	D	K	S
A/chicken/Shenzhen/801/2013	E	V	K	T	I	V	V	V	K	I	D	A	V	K	E	K	I	A	M	D	S	T	I	A	R	T	R	N	N	N	V	V	L	E	R	S	T	I	A	L	K	K	R	R	L	I	D	K	S
A/chicken/Shenzhen/898/2013	E	V	K	T	I	V	V	V	K	I	D	A	V	K	E	K	I	A	M	D	S	T	I	A	R	T	R	N	N	N	V	V	L	E	R	S	T	I	A	L	K	K	R	R	L	I	D	K	S
A/chicken/Suzhou/04020102/2013	K	-	-	-	-	-	-	V	K	I	D	-	-	-	-	-	-	-	-	-	S	T	I	A	-	-	-	-	-	-	-	-	-	-	-	S	T	I	A	L	K	K	R	R	L	I	D	K	S
A/chicken/Suzhou/040201H/2013	K	V	K	N	M	V	M	V	K	I	D	A	V	K	E	K	V	A	M	D	S	T	I	A	-	-	-	-	-	-	-	-	-	-	-	S	T	I	A	L	K	K	R	R	L	I	D	K	S
A/chicken/Wuxi/04030201/2013	K	V	K	N	M	V	M	V	K	I	D	A	V	K	E	K	V	A	M	D	S	T	I	A	-	-	-	-	-	-	-	-	-	-	-	S	T	I	A	L	K	K	R	K	L	I	D	K	S
A/chicken/Wuxi/0405005/2013	K	V	K	N	M	V	M	V	K	I	D	A	V	K	E	K	V	A	M	D	S	T	I	A	R	T	R	N	N	N	V	V	L	E	R	S	T	I	A	L	K	K	R	K	L	I	D	K	S
A/chicken/Zhejiang/SD007/2013	K	V	K	N	M	V	M	V	K	I	D	A	V	K	E	K	I	A	M	D	S	T	I	V	K	T	R	N	D	S	V	V	L	E	R	S	T	I	V	P	K	K	K	K	L	I	D	K	S
A/chicken/Zhejiang/SD019/2013	K	V	K	N	M	V	M	V	K	I	D	A	V	K	E	K	V	A	M	D	S	T	I	A	R	T	R	N	N	N	V	V	L	E	R	S	T	I	A	L	K	K	R	K	L	I	D	K	S
A/chicken/Zhejiang/SD033/2013	T	V	K	N	M	V	M	V	K	I	D	A	V	K	E	K	V	A	M	D	S	T	I	V	R	T	R	N	D	S	V	V	L	E	R	S	T	I	V	L	K	K	K	K	L	I	D	K	S
A/duck/Anhui/SC702/2013	K	V	K	N	M	V	M	V	K	I	D	A	V	K	E	K	V	A	M	D	S	T	I	A	R	T	R	N	N	N	V	V	L	E	R	S	T	I	A	L	K	K	R	K	L	I	D	K	S
A/duck/Sunan/040802G/2013	K	V	K	N	M	V	M	V	K	I	D	A	V	K	E	K	V	A	M	D	S	T	I	A	R	T	R	N	N	N	V	V	L	E	R	S	T	I	A	L	K	K	R	K	L	I	D	K	S
A/duck/Wuxi/0405006/2013	K	V	K	N	M	V	M	V	K	I	D	A	V	K	E	K	V	A	M	D	S	T	I	A	R	T	R	N	N	N	V	V	L	E	R	S	T	I	A	L	K	K	R	K	L	I	D	K	S
A/duck/Zhejiang/SC410/2013	K	V	K	N	M	V	M	V	K	I	D	A	V	K	E	K	I	A	M	D	S	T	I	V	R	T	R	N	D	S	V	V	L	E	R	S	T	I	V	L	K	K	K	K	L	I	D	K	S
A/goose/Jiangsu/1027/2013	E	V	K	T	I	V	M	V	K	I	D	A	V	K	E	K	V	A	M	D	S	T	I	V	K	T	R	N	D	N	V	V	L	E	R	S	T	I	V	P	K	K	K	K	L	I	D	K	S
A/homing_pigeon/Jiangsu/SD184/2013	K	V	K	N	M	V	M	V	K	I	D	A	V	K	E	K	V	A	M	D	S	T	I	A	R	T	R	N	N	N	V	V	L	E	R	S	T	I	A	L	K	K	R	K	L	I	D	K	S
A/Pigeon/Shanghai/S1069/2013	K	V	K	N	M	V	M	V	K	I	D	A	V	K	E	K	I	A	M	D	S	T	I	A	R	T	R	N	N	N	V	V	L	E	R	S	T	I	A	L	K	K	R	K	L	I	D	K	S
A/pigeon/Shanghai/S1421/2013	K	V	K	N	M	V	M	V	K	I	D	A	V	K	E	K	V	A	M	D	S	T	I	A	R	T	R	N	N	N	V	V	L	E	R	S	T	I	A	L	K	K	R	K	L	I	D	K	S
A/pigeon/Shanghai/S1423/2013	K	V	K	N	M	V	M	V	K	I	D	A	V	K	E	K	V	A	M	D	S	T	I	A	R	T	R	N	N	N	V	V	L	E	R	S	T	I	A	L	K	K	R	K	L	I	N	K	S
A/pigeon/Wuxi/0405007G/2013	K	V	K	N	M	V	M	V	K	I	D	A	V	K	E	K	V	A	M	D	S	T	I	A	R	T	R	N	N	N	V	V	L	E	R	S	T	I	A	L	K	K	R	K	L	I	D	K	S
A/silkie_chicken/Dongguan/3049/2013	E	V	K	T	I	V	V	V	K	I	D	A	V	K	E	K	I	A	M	D	S	T	I	V	R	T	K	N	D	N	V	V	L	E	R	S	T	I	V	P	K	K	K	R	L	I	D	K	S
A/silkie_chicken/Dongguan/3166/2013	E	V	K	T	I	V	V	V	K	I	D	A	V	K	E	K	I	A	M	D	S	T	I	V	R	T	K	N	D	N	V	V	L	E	R	S	T	I	V	P	K	K	K	R	L	I	D	K	S
A/silkie_chicken/Dongguan/3275/2013	E	V	K	T	I	V	V	V	K	I	D	A	V	K	E	K	I	A	M	D	S	T	I	V	R	T	K	N	D	N	V	V	L	E	R	S	T	I	V	P	K	K	K	R	L	I	D	K	S
A/silkie_chicken/Dongguan/3281/2013	E	V	K	T	I	V	V	V	K	I	D	A	V	K	E	K	I	A	M	D	S	T	I	A	R	T	R	N	N	N	V	V	L	E	R	S	T	I	A	L	K	K	R	R	L	I	D	K	S
A/silkie_chicken/Dongguan/3284/2013	E	V	K	T	I	V	V	V	K	I	D	A	V	K	E	K	I	A	M	D	S	T	I	V	R	T	K	N	D	N	V	V	L	E	R	S	T	I	V	P	K	K	K	R	L	I	D	K	S
A/silkie_chicken/Dongguan/3520/2013	E	V	K	T	I	V	V	V	K	I	D	A	V	K	E	K	I	A	M	D	S	T	I	V	R	T	K	N	D	N	V	V	L	E	R	S	T	I	V	P	K	K	K	R	L	I	D	K	S
A/silkie_chicken/Dongguan/3522/2013	E	V	K	T	I	V	V	V	K	I	D	A	V	K	E	K	I	A	M	D	S	T	I	V	R	T	K	N	D	N	V	V	L	E	R	S	T	I	V	P	K	K	K	R	L	I	D	K	S
A/silkie_chicken/Dongguan/3525/2013	E	V	K	T	I	V	V	V	K	I	D	A	V	K	E	K	I	A	M	D	S	T	I	X	R	T	X	N	B	N	V	V	L	E	R	S	T	I	X	X	K	K	X	R	L	I	D	K	S
A/silkie_chicken/Dongguan/3526/2013	E	V	K	T	I	V	V	V	K	I	D	A	V	K	E	K	I	A	M	D	S	T	I	V	R	T	K	N	D	N	V	V	L	E	R	S	T	I	V	P	K	K	K	R	L	I	D	K	S
A/silkie_chicken/Dongguan/3528/2013	E	V	K	T	I	V	V	V	K	I	D	A	V	K	E	K	I	A	M	D	S	T	I	A	R	T	R	N	N	N	V	V	L	E	R	S	T	I	A	L	K	K	R	R	L	I	D	K	S
A/silkie_chicken/Dongguan/3605/2013	E	V	K	T	I	V	V	V	K	I	D	A	I	K	E	K	I	A	M	D	S	T	I	A	R	A	R	N	N	N	V	V	L	E	R	S	T	I	A	L	K	K	R	R	L	I	D	K	S
A/silkie_chicken/Dongguan/3606/2013	E	V	K	T	I	V	V	V	K	I	D	A	I	K	E	K	I	A	M	D	S	T	I	A	R	T	R	N	N	N	V	V	L	E	R	S	T	I	A	L	K	K	R	R	L	I	D	K	S
A/silkie_chicken/Dongguan/3980/2013	E	V	K	T	I	V	V	V	K	I	D	A	V	K	E	K	I	A	M	D	S	T	I	V	R	T	K	N	D	N	V	V	L	E	R	S	T	I	V	P	K	K	K	R	L	I	D	K	S
A/silkie_chicken/Dongguan/3990/2013	E	V	K	T	I	V	V	V	K	I	D	T	V	K	E	K	I	A	M	D	S	T	I	V	R	T	K	N	D	N	V	V	L	E	R	S	T	I	V	P	K	K	K	R	L	I	D	K	S
A/silkie_chicken/Dongguan/4126/2013	E	V	K	T	I	V	V	V	K	I	D	A	V	K	E	K	I	A	M	D	S	T	I	A	R	T	R	N	N	N	V	V	L	E	R	S	T	I	A	L	K	K	R	R	L	I	D	K	S
A/silkie_chicken/Dongguan/4127/2013	E	V	K	T	I	V	V	V	K	I	D	A	V	K	E	K	I	A	M	D	S	T	I	A	R	T	R	N	N	N	V	V	L	E	R	S	T	I	A	L	K	K	R	R	L	I	D	K	S
A/silkie_chicken/Dongguan/4129/2013	E	V	K	T	I	V	V	V	K	I	D	A	V	K	E	K	I	A	M	D	S	T	I	A	R	T	R	N	N	N	V	V	L	E	R	S	T	I	A	L	K	K	R	R	L	I	D	K	S
A/silkie_chicken/Huzhou/4213/2013	E	V	K	T	I	V	M	V	K	I	D	A	V	K	E	K	V	A	M	D	S	T	I	A	R	T	R	K	N	N	V	V	L	E	R	S	T	I	A	L	K	K	R	K	L	I	D	K	S
A/silkie_chicken/Shaoxing/5130/2013	E	V	K	T	I	V	M	V	K	I	D	A	V	K	E	K	V	A	M	D	S	T	I	V	K	T	R	N	D	N	V	V	L	E	R	S	T	I	V	P	K	K	K	R	L	I	D	K	S
A/silkie_chicken/Shaoxing/5235/2013	E	V	K	T	I	V	M	V	K	I	D	A	V	K	E	K	V	A	M	D	S	T	I	A	R	T	R	N	N	N	V	V	L	E	R	S	T	I	A	L	K	K	R	K	L	I	D	K	S
A/silkie_chicken/Shenzhen/2134/2013	E	I	K	T	I	V	V	V	K	I	D	A	V	K	E	K	I	A	M	D	S	T	I	V	R	T	K	N	D	N	V	V	L	E	R	S	T	I	V	P	K	K	K	K	L	I	D	K	S
A/silkie_chicken/Shenzhen/2139/2013	E	I	K	T	I	V	V	V	K	I	D	A	V	K	E	K	I	A	M	D	S	T	I	V	R	T	K	N	D	N	V	V	L	E	R	S	T	I	V	P	K	K	K	K	L	I	D	K	S
A/silkie_chicken/Shenzhen/3781/2013	E	V	K	T	I	V	V	V	K	I	D	A	V	K	E	K	I	A	M	D	S	T	I	A	R	T	R	N	N	N	V	V	L	E	R	S	T	I	A	L	K	K	R	K	L	I	D	K	S
A/silkie_chicken/Shenzhen/3782/2013	E	V	K	T	I	V	V	V	K	I	D	A	V	K	E	K	I	A	M	D	S	T	I	A	R	T	R	N	N	N	V	V	L	E	R	S	T	I	A	L	K	K	R	K	L	I	D	K	S
A/silkie_chicken/Shenzhen/918/2013	E	V	K	T	I	V	V	V	K	I	D	A	V	K	E	K	I	A	M	D	S	T	I	A	R	T	R	N	N	N	V	V	L	E	R	S	T	I	A	L	K	K	R	K	L	I	D	K	S
A/silkie_chicken/Shenzhen/919/2013	E	V	K	T	I	V	V	V	K	I	D	A	V	K	E	K	I	A	M	D	S	T	I	A	R	T	R	N	N	N	V	V	L	E	R	S	T	I	A	L	K	K	R	K	L	I	D	K	S
A/tree_sparrow/Shanghai/01/2013	K	V	K	N	M	V	M	V	K	I	D	A	V	K	E	K	V	A	M	D	S	T	I	A	R	T	R	N	N	N	V	V	L	E	R	S	T	I	A	L	K	K	R	K	L	I	D	K	S
A/wild_pigeon/Jiangsu/SD001/2013	K	V	K	N	M	V	M	V	K	I	D	A	V	K	E	K	V	A	M	D	S	T	I	A	R	T	R	N	N	N	V	V	L	E	R	S	T	I	A	L	K	K	R	K	L	I	D	K	S
A/chicken/Dongguan/1009/2014	E	V	K	T	I	V	V	V	K	I	D	A	V	K	E	K	I	A	M	D	S	T	I	V	R	T	K	N	D	N	V	V	L	E	R	S	T	I	V	P	K	K	K	R	L	I	D	K	S
A/chicken/Dongguan/1022/2014	E	V	K	T	M	V	M	V	K	I	D	A	V	K	E	K	I	A	M	D	S	T	I	V	R	T	K	N	D	N	V	V	L	E	R	S	T	I	V	P	K	K	K	K	Q	I	D	K	S
A/chicken/Dongguan/1318/2014	E	V	K	T	I	V	V	V	K	I	D	A	V	K	E	K	I	A	M	D	S	T	I	V	R	T	R	N	D	S	V	V	L	E	G	S	T	I	V	L	K	K	K	R	L	I	D	K	S
A/chicken/Dongguan/1358/2014	E	V	K	T	I	V	V	V	K	I	D	A	V	K	E	K	I	A	M	D	S	T	I	A	R	T	R	N	N	N	V	V	L	E	R	S	T	I	A	P	K	K	R	M	L	I	D	K	S
A/chicken/Dongguan/1374/2014	E	V	K	T	I	V	V	V	K	I	D	A	V	K	E	K	I	A	M	D	S	T	I	V	R	T	K	N	D	N	V	V	L	E	R	S	T	I	V	P	K	K	K	R	L	I	D	K	S
A/chicken/Dongguan/1382/2014	E	V	K	T	I	V	V	V	K	I	D	A	V	K	E	K	I	A	M	D	S	T	I	V	R	T	R	N	D	S	V	V	L	E	G	S	T	I	V	L	K	K	K	M	L	I	D	K	S
A/chicken/Dongguan/1393/2014	E	V	K	T	I	V	V	V	K	I	D	A	V	K	E	K	I	A	M	D	S	T	I	V	R	T	R	N	D	S	V	V	L	E	G	S	T	I	V	L	K	K	K	R	L	I	D	K	S
A/chicken/Dongguan/1401/2014	E	V	K	T	I	V	V	V	K	I	D	A	V	K	E	K	I	A	M	D	S	T	I	V	R	T	K	N	D	N	V	V	L	E	R	S	T	I	V	P	K	K	K	R	L	I	D	K	S
A/chicken/Dongguan/1421/2014	E	V	K	T	M	V	M	V	K	I	D	A	V	K	E	K	I	A	M	D	S	T	I	V	R	T	K	N	D	N	V	V	L	E	R	S	T	I	V	P	K	K	K	R	L	I	D	K	S
A/chicken/Dongguan/1433/2014	E	V	K	T	I	V	V	V	K	I	D	A	V	K	E	K	I	A	M	D	S	T	I	V	R	T	R	N	D	S	V	V	L	E	G	S	T	I	V	L	K	K	K	R	L	I	D	K	S
A/chicken/Dongguan/1456/2014	E	V	K	T	I	V	V	V	K	I	D	A	V	K	E	K	I	A	M	D	S	T	I	V	R	T	K	N	D	N	V	V	L	E	R	S	T	I	V	P	K	K	K	R	L	I	D	K	S
A/chicken/Dongguan/1459/2014	E	V	K	T	I	V	V	V	K	I	D	A	V	K	E	K	I	A	M	D	S	T	I	V	R	T	K	N	D	N	V	V	L	E	R	S	T	I	V	P	K	K	K	R	L	I	D	K	S
A/chicken/Dongguan/1494/2014	E	V	K	T	I	V	V	V	K	I	D	A	V	K	E	K	I	A	M	D	S	T	I	V	R	T	K	N	D	N	V	V	L	E	R	S	T	I	V	P	K	K	K	R	L	I	D	K	S
A/chicken/Dongguan/1505/2014	E	V	K	T	M	V	M	V	K	I	D	A	V	K	E	K	I	A	M	D	S	T	I	V	R	T	K	N	D	N	V	V	L	E	R	S	T	I	V	P	K	K	K	R	L	I	D	K	S
A/chicken/Dongguan/1506/2014	E	V	K	T	M	V	M	V	K	I	D	A	V	K	E	K	I	A	M	D	S	T	I	V	R	T	K	N	D	N	V	V	L	E	R	S	T	I	V	P	K	K	K	R	L	I	D	K	S
A/chicken/Dongguan/1526/2014	E	V	K	T	I	V	V	V	K	I	D	A	V	K	E	K	I	A	M	D	S	T	I	V	R	T	R	N	D	S	V	V	L	E	G	S	T	I	V	L	K	K	K	R	L	I	D	K	S
A/chicken/Dongguan/1527/2014	E	V	K	T	I	V	V	V	K	I	D	A	V	K	E	K	I	A	M	D	S	T	I	V	R	T	R	N	D	S	V	V	L	E	G	S	T	I	V	L	K	K	K	R	L	I	D	K	S
A/chicken/Dongguan/1533/2014	E	V	K	T	I	V	V	V	K	I	D	A	V	K	E	K	I	A	M	D	S	T	I	V	R	T	R	N	D	S	V	V	L	E	G	S	T	I	V	L	K	K	K	R	L	I	D	K	S
A/chicken/Dongguan/1548/2014	E	V	K	T	I	V	V	V	K	I	D	A	V	K	E	K	I	A	M	D	S	T	I	V	R	T	K	N	D	X	V	V	L	E	R	S	T	I	V	P	K	K	K	R	L	I	D	K	S
A/chicken/Dongguan/1619/2014	E	V	K	T	I	V	V	V	K	I	D	A	V	K	E	K	I	A	M	D	S	T	I	A	R	T	R	N	N	N	V	V	L	E	R	S	T	I	A	L	K	K	R	R	L	I	D	K	S
A/chicken/Dongguan/1666/2014	E	V	K	T	I	V	V	V	K	I	D	A	V	K	E	K	I	A	M	D	S	T	I	A	R	T	R	N	N	N	V	V	L	E	R	S	T	I	A	L	K	K	R	R	L	I	D	K	S
A/chicken/Dongguan/1673/2014	E	V	K	T	I	V	V	V	K	I	D	A	V	K	E	K	I	A	M	D	S	T	I	V	R	T	K	N	D	N	V	V	L	E	R	S	T	I	V	P	K	K	K	R	L	I	D	K	S
A/chicken/Dongguan/169/2014	E	V	K	T	M	V	M	V	K	I	D	A	V	K	E	K	I	A	M	D	S	T	I	V	R	T	K	N	D	N	V	V	L	E	R	S	T	I	V	P	K	K	K	R	L	I	D	K	S
A/chicken/Dongguan/1690/2014	E	V	K	T	M	V	M	V	K	I	D	A	V	K	E	K	I	A	M	D	S	T	I	V	R	T	K	N	D	N	V	V	L	E	R	S	T	I	V	P	K	K	K	R	L	I	D	K	S
A/chicken/Dongguan/1697/2014	E	-	-	-	-	-	-	V	K	I	D	A	V	K	E	K	I	A	M	D	S	T	I	V	R	T	K	N	D	N	V	V	L	E	R	S	T	I	V	P	K	K	K	R	L	I	D	K	S
A/chicken/Dongguan/173/2014	E	V	K	T	I	V	V	V	K	I	D	A	V	K	E	K	I	A	M	D	S	T	I	V	R	T	K	N	D	N	V	V	L	E	R	S	T	I	V	P	K	K	K	M	L	I	D	K	S
A/chicken/Dongguan/178/2014	E	V	K	T	I	V	V	V	K	I	D	A	V	K	E	K	I	A	M	D	S	T	I	V	R	T	K	N	D	N	V	V	L	E	R	S	T	I	V	P	K	K	K	R	Q	I	D	K	S
A/chicken/Dongguan/189/2014	E	V	K	T	I	V	V	V	K	I	D	A	V	K	E	K	I	A	M	D	S	I	I	V	R	T	K	N	D	N	V	V	L	E	R	S	T	I	V	P	K	K	K	R	L	I	D	K	S
A/chicken/Dongguan/191/2014	E	V	K	T	M	V	M	V	K	I	D	A	V	K	E	K	I	A	M	D	S	I	I	V	R	T	K	N	D	N	V	V	L	E	R	S	T	I	V	P	K	K	K	K	Q	I	D	K	S
A/chicken/Dongguan/210/2014	E	V	K	T	I	V	V	V	K	I	D	A	V	K	E	K	I	A	M	D	S	I	I	V	R	T	K	N	D	N	V	V	L	E	R	S	T	I	V	P	K	K	K	K	Q	I	D	K	S
A/chicken/Dongguan/213/2014	E	V	K	T	I	V	V	V	K	I	D	A	V	K	E	K	I	A	M	D	S	I	I	V	R	T	K	N	D	N	V	V	L	E	R	S	T	I	V	P	K	K	K	R	Q	I	D	K	S
A/chicken/Dongguan/237/2014	E	V	K	T	I	V	V	V	K	I	D	A	V	K	E	K	I	A	M	D	S	I	I	V	R	T	K	N	D	N	V	V	L	E	R	S	T	I	V	P	K	K	K	R	L	I	D	K	S
A/chicken/Dongguan/248/2014	E	V	K	T	I	V	V	V	K	I	D	A	V	K	E	K	I	A	M	D	S	I	I	V	R	T	K	N	D	N	V	V	L	E	R	S	T	I	V	P	K	K	K	R	L	I	D	R	S
A/chicken/Dongguan/262/2014	E	V	K	T	I	V	V	V	K	I	D	A	V	K	E	K	I	A	M	D	S	I	I	V	R	T	K	N	D	N	V	V	L	E	R	S	T	I	V	P	K	K	K	R	L	I	D	K	S
A/chicken/Dongguan/397/2014	E	V	K	T	I	V	V	V	K	I	D	A	V	K	E	K	I	A	M	D	S	I	I	V	R	T	R	N	D	S	V	V	L	E	G	S	T	I	V	L	K	K	K	R	Q	M	N	K	S
A/chicken/Dongguan/449/2014	E	V	K	T	I	V	V	V	K	I	D	A	V	K	E	K	I	A	M	D	S	I	I	V	R	T	R	N	D	S	V	V	L	E	G	S	T	I	V	L	K	K	K	R	Q	M	N	R	S
A/chicken/Dongguan/518/2014	E	V	K	T	I	V	V	V	K	I	D	A	V	K	E	K	I	A	M	D	S	I	I	V	R	T	K	N	D	N	V	V	L	E	R	S	T	I	V	P	K	K	K	R	Q	M	N	R	S
A/chicken/Dongguan/536/2014	E	V	K	T	M	V	M	V	K	I	D	T	V	K	E	K	I	A	M	D	S	I	I	V	R	T	K	N	D	N	V	V	L	E	R	S	T	I	V	P	K	K	K	R	Q	-	-	-	S
A/chicken/Dongguan/568/2014	E	V	K	T	I	V	V	V	K	I	D	A	V	K	E	K	I	A	M	D	S	I	I	V	R	T	R	N	D	S	V	V	L	E	G	S	T	I	V	L	K	K	K	R	L	I	D	K	S
A/chicken/Dongguan/575/2014	E	V	K	T	I	V	V	V	K	I	D	A	V	K	E	K	I	A	M	D	S	I	I	V	R	T	R	N	D	S	V	V	L	E	G	S	T	I	V	L	K	K	K	R	L	I	D	K	S
A/chicken/Dongguan/584/2014	E	V	K	T	I	V	V	V	K	I	D	A	V	K	E	K	I	A	M	D	S	I	I	V	R	T	R	N	D	S	V	V	L	E	G	S	T	I	V	L	K	K	K	R	Q	M	N	R	S
A/chicken/Dongguan/695/2014	E	V	K	T	I	V	V	V	K	I	D	A	V	K	E	K	I	A	M	D	S	I	I	V	R	T	R	N	D	S	V	V	L	E	R	S	T	I	V	L	K	K	K	R	Q	M	N	R	S
A/chicken/Dongguan/709/2014	E	V	K	T	I	V	V	V	K	I	D	A	V	K	E	K	I	A	M	D	S	I	I	V	R	T	R	N	D	S	V	V	L	E	R	S	T	I	V	L	K	K	K	R	Q	M	N	R	S
A/chicken/Dongguan/711/2014	E	V	K	T	I	V	V	V	K	I	D	A	V	K	E	K	I	A	M	D	S	I	I	V	R	T	K	N	D	N	V	V	L	E	R	S	T	I	V	P	K	K	K	R	Q	M	N	R	S
A/chicken/Dongguan/744/2014	E	V	K	T	I	V	V	V	K	I	D	A	V	K	E	K	I	A	M	D	S	I	I	V	R	T	K	N	D	N	V	V	L	E	R	S	T	I	V	P	K	K	K	R	Q	M	N	R	S
A/chicken/Dongguan/748/2014	E	V	K	T	I	V	V	V	K	I	D	A	V	K	E	K	I	A	M	D	S	I	I	A	R	T	R	N	N	N	V	V	L	E	R	S	T	I	A	L	K	K	R	R	Q	M	N	R	S
A/chicken/Dongguan/749/2014	E	V	K	T	I	V	V	V	K	I	D	A	V	K	E	K	I	A	M	D	S	I	I	V	R	T	K	N	D	N	V	V	L	E	R	S	T	I	V	P	K	K	K	R	Q	M	N	R	S
A/chicken/Dongguan/803/2014	E	V	K	T	I	V	V	V	K	I	D	A	V	K	E	K	I	A	M	D	S	I	I	A	R	T	R	N	N	N	V	V	L	E	R	S	T	I	A	L	K	K	R	R	Q	M	N	R	S
A/chicken/Dongguan/815/2014	E	V	K	T	I	V	V	V	K	I	D	A	V	K	E	K	I	A	M	D	S	I	I	V	R	T	R	N	D	S	V	V	L	E	R	S	T	I	V	L	K	K	K	R	Q	M	N	R	S
A/chicken/Dongguan/835/2014	E	V	K	T	I	V	V	V	K	I	D	A	V	K	E	K	I	A	M	D	S	I	I	V	R	T	K	N	D	N	V	V	L	E	R	S	T	I	V	L	K	K	K	R	Q	-	-	-	S
A/chicken/Dongguan/836/2014	E	V	K	T	I	V	V	V	K	I	D	A	V	K	E	K	I	A	M	D	S	I	I	A	R	T	R	N	N	N	V	V	L	E	R	S	T	I	A	L	K	K	R	-	-	-	-	-	S
A/chicken/Dongguan/843/2014	E	V	K	T	I	V	V	V	K	I	D	A	V	K	E	K	I	A	M	D	S	I	I	A	R	T	R	N	N	N	V	V	L	E	R	S	T	I	A	L	K	K	R	K	Q	-	-	-	S
A/chicken/Dongguan/850/2014	E	V	K	T	I	V	V	V	K	I	D	A	V	K	E	K	I	A	M	D	S	I	I	A	R	T	R	N	N	N	V	V	L	E	R	S	T	I	A	L	K	K	R	K	Q	-	-	-	S
A/chicken/Dongguan/851/2014	E	V	K	T	I	V	V	V	K	I	D	A	V	K	E	K	I	A	M	D	S	I	I	V	R	T	K	N	D	N	V	V	L	E	R	S	T	I	V	P	K	K	K	R	Q	M	N	R	S
A/chicken/Dongguan/856/2014	E	V	K	T	I	V	V	V	K	I	D	A	V	K	E	K	I	A	M	D	S	I	I	V	R	T	R	N	D	S	V	V	L	E	G	S	T	I	V	L	K	K	K	R	Q	M	N	R	S
A/chicken/Dongguan/864/2014	E	V	K	T	I	V	V	V	K	I	D	A	V	K	E	K	I	A	M	D	S	I	I	V	R	T	K	N	D	N	V	V	L	E	R	S	T	I	V	P	K	K	K	R	Q	M	N	R	S
A/chicken/Dongguan/874/2014	E	V	K	T	I	V	V	V	K	I	D	A	V	K	E	K	I	A	M	D	S	I	I	V	R	T	K	N	D	N	V	V	L	E	R	S	T	I	V	P	K	K	K	R	Q	M	N	R	S
A/chicken/Dongguan/899/2014	E	V	K	T	I	V	V	V	K	I	D	A	V	K	E	K	I	A	M	D	S	I	I	V	R	T	K	N	D	N	V	V	L	E	R	S	T	I	V	P	K	K	K	R	Q	M	N	R	S
A/chicken/Dongguan/934/2014	E	V	K	T	M	V	M	V	K	I	D	A	V	K	E	K	I	A	M	D	S	I	I	V	R	T	R	N	D	S	V	V	L	E	G	S	T	I	V	L	K	K	K	R	Q	M	N	R	S
A/chicken/Huai'an/007/2014	E	V	K	T	I	V	M	V	K	I	D	A	V	K	E	K	I	A	M	D	S	T	I	V	R	T	R	N	D	N	V	V	L	E	R	S	T	I	V	P	K	K	K	R	L	I	D	K	S
A/chicken/Jiangxi/10552/2014	E	V	K	T	I	V	M	A	K	I	D	A	V	K	E	K	I	A	M	D	S	T	I	V	K	T	R	N	D	N	V	V	L	E	R	S	T	I	V	P	K	K	K	R	L	-	-	-	S
A/chicken/Jiangxi/10573/2014	E	V	K	T	I	V	M	A	K	I	D	A	V	K	E	K	I	A	M	D	S	T	I	V	K	T	R	N	D	N	V	V	L	E	R	S	T	I	V	P	K	K	K	R	L	-	-	-	S
A/chicken/Jiangxi/10870/2014	E	V	K	T	I	V	M	A	K	I	D	A	V	K	E	K	I	A	M	D	S	T	I	V	K	T	R	N	D	N	V	V	L	E	R	S	T	I	V	P	K	K	K	R	L	I	D	K	S
A/chicken/Jiangxi/10871/2014	E	V	K	T	I	V	M	A	K	I	D	A	V	K	E	K	I	A	M	D	S	T	I	V	K	T	R	N	D	N	V	V	L	E	R	S	T	I	V	P	K	K	K	R	L	I	D	K	S
A/chicken/Jiangxi/10873/2014	E	V	K	T	I	V	M	A	K	I	D	A	V	K	E	K	I	A	M	D	S	T	I	V	K	T	R	N	D	N	V	V	L	E	R	S	T	I	V	P	K	K	K	R	L	I	D	K	S
A/chicken/Jiangxi/10874/2014	E	V	K	T	I	V	M	A	K	I	D	A	V	K	E	K	I	A	M	D	S	T	I	V	K	T	R	N	D	N	V	V	L	E	R	S	T	I	V	P	K	K	K	K	L	I	D	K	S
A/chicken/Jiangxi/10875/2014	E	V	K	T	I	V	M	A	K	I	D	A	V	K	E	K	I	A	M	D	S	T	I	V	K	T	R	N	D	N	V	V	L	E	R	S	T	I	V	P	K	K	K	R	L	I	D	K	S
A/chicken/Jiangxi/10877/2014	E	V	K	T	I	V	M	A	K	I	D	A	V	K	E	K	I	A	M	D	S	T	I	V	K	T	R	N	D	N	V	V	L	E	R	S	T	I	V	P	K	K	K	R	L	I	D	K	S
A/chicken/Jiangxi/10882/2014	E	V	K	T	I	V	M	A	K	I	D	A	V	K	E	K	I	A	M	D	S	T	I	V	K	T	R	N	D	N	V	V	L	E	R	S	T	I	V	P	K	K	K	M	L	I	D	K	S
A/chicken/Jiangxi/10885/2014	E	V	K	T	I	V	M	A	K	I	D	A	V	K	E	K	I	A	M	D	S	T	I	V	K	T	R	N	D	N	V	V	L	E	R	S	T	I	V	P	K	K	K	R	L	-	-	-	S
A/chicken/Jiangxi/10894/2014	E	V	K	T	I	V	M	A	K	I	D	A	V	K	E	K	I	A	M	D	S	T	I	V	K	T	R	N	D	N	V	V	L	E	R	S	T	I	V	P	K	K	K	R	L	-	-	-	S
A/chicken/Jiangxi/10895/2014	E	V	K	T	I	V	M	A	K	I	D	A	V	K	E	K	I	A	M	D	S	T	I	V	K	T	R	N	D	N	V	V	L	E	R	S	T	I	V	P	K	K	K	R	L	-	-	-	S
A/chicken/Jiangxi/10896/2014	E	V	K	T	I	V	M	A	K	I	D	A	V	K	E	K	I	A	M	D	S	T	I	V	K	T	R	N	D	N	V	V	L	E	R	S	T	I	V	P	K	K	K	M	L	I	D	K	S
A/chicken/Jiangxi/10897/2014	E	V	K	T	I	V	M	A	K	I	D	A	V	K	E	K	I	A	M	D	S	T	I	V	K	T	R	N	D	N	V	V	L	E	R	S	T	I	V	P	K	K	K	R	L	I	D	K	S
A/chicken/Jiangxi/10929/2014	E	V	K	T	I	V	M	A	K	I	D	A	V	K	E	K	I	A	M	D	S	T	I	V	K	T	R	N	D	N	V	V	L	E	R	S	T	I	V	P	K	K	K	M	L	I	D	K	S
A/chicken/Jiangxi/10939/2014	E	V	K	T	I	V	M	A	K	I	D	A	V	K	E	K	I	A	M	D	S	T	I	V	K	T	R	N	D	N	V	V	L	E	R	S	T	I	V	P	K	K	K	R	Q	M	N	R	S
A/chicken/Jiangxi/10943/2014	E	V	K	T	I	V	M	A	K	I	D	A	V	K	E	K	I	A	M	D	S	T	I	V	K	T	R	N	D	N	V	V	L	E	R	S	T	I	V	P	K	K	K	R	Q	M	N	R	S
A/chicken/Jiangxi/10945/2014	E	V	K	T	I	V	M	A	K	I	D	A	V	K	E	K	I	A	M	D	S	T	I	V	K	T	R	N	D	N	V	V	L	E	R	S	T	I	V	P	K	K	K	R	Q	M	N	K	S
A/chicken/Jiangxi/10946/2014	E	V	K	T	I	V	M	A	K	I	D	A	V	K	E	K	I	A	M	D	S	T	I	V	K	T	R	N	D	N	V	V	L	E	R	S	T	I	V	P	K	K	K	R	Q	M	N	R	S
A/chicken/Jiangxi/10947/2014	E	V	K	T	I	V	M	A	K	I	D	A	V	K	E	K	I	A	M	D	S	T	I	V	K	T	R	N	D	N	V	V	L	E	R	S	T	I	V	P	K	K	K	R	Q	M	N	K	S
A/chicken/Jiangxi/10948/2014	E	V	K	T	I	V	M	A	K	I	D	A	V	K	E	K	I	A	M	D	S	T	I	V	K	T	R	N	D	N	V	V	L	E	R	S	T	I	V	P	K	K	K	R	Q	-	-	-	S
A/chicken/Jiangxi/10950/2014	E	V	K	T	I	V	M	A	K	I	D	A	V	K	E	K	I	A	M	D	S	T	I	V	K	T	R	N	D	N	V	V	L	E	R	S	T	I	V	P	K	K	K	R	Q	M	N	R	S
A/chicken/Jiangxi/10953/2014	E	V	K	T	I	V	M	A	K	I	D	A	V	K	E	K	I	A	M	D	S	T	I	V	K	T	R	N	D	N	V	V	L	E	R	S	T	I	V	P	K	K	K	R	Q	M	N	R	S
A/chicken/Jiangxi/10954/2014	E	V	K	T	I	V	M	A	K	I	D	A	V	K	E	K	I	A	M	D	S	T	I	V	K	T	R	N	D	N	V	V	L	E	R	S	T	I	V	P	K	K	K	R	Q	I	N	K	S
A/chicken/Jiangxi/10955/2014	E	V	K	T	I	V	M	A	K	I	D	A	V	K	E	K	I	A	M	D	S	T	I	V	K	T	R	N	D	N	V	V	L	E	R	S	T	I	V	P	K	K	K	R	Q	M	N	K	S
A/chicken/Jiangxi/10956/2014	E	V	K	T	I	V	M	A	K	I	D	A	V	K	E	K	I	A	M	D	S	T	I	V	K	T	R	N	D	N	V	V	L	E	R	S	T	I	V	P	K	K	K	-	-	-	-	-	S
A/chicken/Jiangxi/10957/2014	E	V	K	T	I	V	M	A	K	I	D	A	V	K	E	K	I	A	M	D	S	T	I	V	K	T	R	N	D	N	V	V	L	E	R	S	T	I	V	P	K	K	K	R	Q	M	N	K	S
A/chicken/Jiangxi/10958/2014	E	V	K	T	I	V	M	A	K	I	D	A	V	K	E	K	I	A	M	D	S	T	I	V	K	T	R	N	D	N	V	V	L	E	R	S	T	I	V	P	K	K	K	R	Q	-	-	-	S
A/chicken/Jiangxi/10959/2014	E	V	K	T	I	V	M	A	K	I	D	A	V	K	E	K	I	A	M	D	S	T	I	V	K	T	R	N	D	N	V	V	L	E	R	S	T	I	V	P	K	K	K	-	-	M	N	R	S
A/chicken/Jiangxi/10961/2014	E	V	K	T	I	V	M	A	K	I	D	A	V	K	E	K	I	A	M	D	S	T	I	V	K	T	R	N	D	N	V	V	L	E	R	S	T	I	V	P	K	K	K	R	Q	M	N	R	S
A/chicken/Jiangxi/10962/2014	E	V	K	T	I	V	M	A	K	I	D	A	V	K	E	K	I	A	M	D	S	T	I	V	K	T	R	N	D	N	V	V	L	E	R	S	T	I	V	P	K	K	K	K	Q	M	N	R	S
A/chicken/Jiangxi/10963/2014	E	V	K	T	I	V	M	A	K	I	D	A	V	K	E	K	I	A	M	D	S	T	I	V	K	T	R	N	D	N	V	V	L	E	R	S	T	I	V	P	K	K	K	K	Q	M	N	R	S
A/chicken/Jiangxi/10964/2014	E	V	K	T	I	V	M	A	K	I	D	A	V	K	E	K	I	A	M	D	S	T	I	V	K	T	R	N	D	N	V	V	L	E	R	S	T	I	V	P	K	K	K	R	Q	M	N	R	S
A/chicken/Jiangxi/10965/2014	E	V	K	T	I	V	M	A	K	I	D	A	V	K	E	K	I	A	M	D	S	T	I	V	K	T	R	N	D	N	V	V	L	E	R	S	T	I	V	P	K	K	K	R	Q	M	N	R	S
A/chicken/Jiangxi/12200/2014	E	V	K	T	I	V	M	V	K	I	D	A	V	K	E	K	V	A	M	D	S	T	I	V	K	T	R	N	D	N	V	V	L	E	R	S	T	I	V	P	K	K	K	R	Q	M	N	R	S
A/chicken/Jiangxi/12201/2014	E	V	K	T	I	V	M	V	K	I	D	A	V	K	E	K	V	A	M	D	S	T	I	V	K	T	R	N	D	N	V	V	L	E	R	S	T	I	V	P	K	K	K	R	Q	M	N	R	S
A/chicken/Jiangxi/12206/2014	E	V	K	T	I	V	M	V	K	I	D	A	V	K	E	K	V	A	M	D	S	T	I	V	K	T	R	N	D	N	V	V	L	E	R	S	T	I	V	P	K	K	K	R	L	I	D	K	S
A/chicken/Jiangxi/12208/2014	E	V	K	T	I	V	M	V	K	I	D	A	V	K	E	K	V	A	M	D	S	T	I	V	K	T	R	N	D	N	V	V	L	E	R	S	T	I	V	P	K	K	K	R	L	I	D	K	S
A/chicken/Jiangxi/12210/2014	E	V	K	T	I	V	M	V	K	I	D	A	V	K	E	K	V	A	M	D	S	T	I	V	K	T	R	N	D	N	V	V	L	E	R	S	T	I	V	P	K	K	K	R	Q	M	N	R	S
A/chicken/Jiangxi/12216/2014	E	V	K	T	I	V	M	V	K	I	D	A	V	K	E	K	V	A	M	D	S	T	I	V	K	T	R	N	D	N	V	V	L	E	R	S	T	I	V	P	K	K	K	R	L	I	D	K	S
A/chicken/Jiangxi/12217/2014	K	V	K	T	I	V	M	V	K	I	D	A	V	K	E	K	V	A	M	D	S	T	I	V	K	T	R	N	D	N	V	V	L	E	R	S	T	I	V	P	K	K	K	M	L	I	D	K	S
A/chicken/Jiangxi/12219/2014	E	V	K	T	I	V	M	V	K	I	D	A	V	K	E	K	V	A	M	D	S	T	I	V	K	T	R	N	D	N	V	V	L	E	R	S	T	I	V	P	K	K	K	K	Q	I	D	K	S
A/chicken/Jiangxi/12221/2014	E	V	K	T	I	V	M	V	K	I	D	A	V	K	E	K	V	A	M	D	S	T	I	V	K	T	R	N	D	N	V	V	L	E	R	S	T	I	V	P	K	K	K	R	L	I	D	K	S
A/chicken/Jiangxi/12222/2014	E	V	K	T	I	V	M	V	K	I	D	A	V	K	E	K	V	A	M	D	S	T	I	V	K	T	R	N	D	N	V	V	L	E	R	S	T	I	V	P	K	K	K	R	L	I	D	K	S
A/chicken/Jiangxi/12223/2014	E	V	K	T	I	V	M	V	K	I	D	A	V	K	E	K	V	A	M	D	S	T	I	V	K	T	R	N	D	N	V	V	L	E	R	S	T	I	V	P	K	K	K	R	Q	M	N	R	S
A/chicken/Jiangxi/12232/2014	E	V	K	T	I	V	M	V	K	I	D	A	V	K	E	K	V	A	M	D	S	T	I	V	K	T	R	N	D	N	V	V	L	E	R	S	T	I	V	P	K	K	K	R	L	I	D	K	S
A/chicken/Jiangxi/12239/2014	E	V	K	T	I	V	M	V	K	I	D	A	V	K	E	K	V	A	M	D	S	T	I	V	K	T	R	N	D	N	V	V	L	E	R	S	T	I	V	P	K	K	K	K	Q	I	D	K	S
A/chicken/Jiangxi/12240/2014	E	V	K	T	I	V	M	V	K	I	D	A	V	K	E	K	V	A	M	D	S	A	I	A	R	T	R	N	N	N	V	V	L	E	R	S	A	I	A	P	K	K	R	R	L	I	D	K	S
A/chicken/Jiangxi/12243/2014	E	V	K	T	I	V	M	V	K	I	D	A	V	K	E	K	V	A	M	D	S	T	I	V	K	T	R	N	D	N	V	V	L	E	R	S	T	I	V	P	K	K	K	R	L	I	D	K	S
A/chicken/Jiangxi/12245/2014	E	V	K	T	I	V	M	V	K	I	D	A	V	K	E	K	V	A	M	D	S	T	I	V	K	T	R	N	D	N	V	V	L	E	R	S	T	I	V	P	K	K	K	R	Q	I	D	K	S
A/chicken/Jiangxi/12247/2014	E	V	K	T	I	V	M	V	K	I	D	A	V	K	E	K	V	A	M	D	S	T	I	V	K	T	R	N	D	N	V	V	L	E	R	S	T	I	V	P	K	K	K	R	L	I	D	K	S
A/chicken/Jiangxi/12248/2014	E	V	K	T	I	V	M	V	K	I	D	A	V	K	E	K	V	A	M	D	S	T	I	V	K	T	R	N	D	N	V	V	L	E	R	S	T	I	V	P	K	K	K	R	L	I	D	K	S
A/chicken/Jiangxi/12249/2014	E	V	K	T	I	V	M	V	K	I	D	A	V	K	E	K	V	A	M	D	S	T	I	V	K	T	R	N	D	N	V	V	L	E	R	S	T	I	V	P	K	K	K	R	L	I	D	R	S
A/chicken/Jiangxi/12251/2014	E	V	K	T	I	V	M	V	K	I	D	A	V	K	E	K	V	A	M	D	S	T	I	V	K	T	R	N	D	N	V	V	L	E	R	S	T	I	V	P	K	K	K	R	L	I	D	K	S
A/chicken/Jiangxi/12254/2014	E	V	K	T	I	V	M	V	K	I	D	A	V	K	E	K	V	A	M	D	S	T	I	V	K	T	R	N	D	N	V	V	L	E	R	S	T	I	V	P	K	K	K	R	Q	I	D	K	S
A/chicken/Jiangxi/12256/2014	E	V	K	T	I	V	M	V	K	I	D	A	V	K	E	K	V	A	M	D	S	T	I	V	K	T	R	N	D	N	V	V	L	E	R	S	T	I	V	P	K	K	K	R	L	I	D	K	S
A/chicken/Jiangxi/12260/2014	E	V	K	T	I	V	M	V	K	I	D	A	V	K	E	K	V	A	M	D	S	T	I	V	K	T	R	N	D	N	V	V	L	E	R	S	T	I	V	P	K	K	K	R	Q	I	D	K	S
A/chicken/Jiangxi/12261/2014	E	V	K	T	I	V	M	V	K	I	D	A	V	K	E	K	V	A	M	D	S	T	I	V	K	T	R	N	D	N	V	V	L	E	R	S	T	I	V	P	K	K	K	M	L	I	D	K	S
A/chicken/Jiangxi/12264/2014	E	V	K	T	I	V	M	V	K	I	D	A	V	K	E	K	V	A	M	D	S	T	I	V	K	T	R	N	D	N	V	V	L	E	R	S	T	I	V	P	K	K	K	R	L	I	D	K	S
A/chicken/Jiangxi/12265/2014	E	V	K	T	I	V	M	V	K	I	D	A	V	K	E	K	V	A	M	D	S	T	I	V	K	T	R	N	D	N	V	V	L	E	R	S	T	I	V	P	K	K	K	R	L	I	D	K	S
A/chicken/Jiangxi/12273/2014	E	V	K	T	I	V	M	V	K	I	D	A	V	K	E	K	V	A	M	D	S	T	I	V	K	T	R	N	D	N	V	V	L	E	R	S	T	I	V	P	K	K	K	R	L	I	D	K	S
A/chicken/Jiangxi/12274/2014	E	V	K	T	I	V	M	V	K	I	D	A	V	K	E	K	V	A	M	D	S	T	I	V	K	T	R	N	D	N	V	V	L	E	R	S	T	I	V	P	K	K	K	R	L	I	D	K	S
A/chicken/Jiangxi/12768/2014	E	V	K	T	I	V	M	V	K	I	D	A	V	K	E	K	V	A	M	D	S	T	I	A	R	T	R	N	N	N	V	V	L	E	S	S	T	I	A	P	K	K	R	R	L	I	D	K	N
A/chicken/Jiangxi/13207/2014	E	V	K	T	I	V	M	V	K	I	D	A	V	K	E	K	V	A	M	D	S	T	I	V	K	T	R	N	D	N	V	V	L	E	R	S	T	I	V	P	K	K	K	M	L	I	D	K	S
A/chicken/Jiangxi/13209/2014	E	V	K	T	I	V	M	V	K	I	D	A	V	K	E	K	V	A	M	D	S	T	I	V	K	T	R	N	D	N	V	V	L	E	R	S	T	I	V	P	K	K	K	R	L	I	D	K	S
A/chicken/Jiangxi/13210/2014	E	V	K	T	I	V	M	V	K	I	D	A	V	K	E	K	V	A	M	D	S	T	I	A	R	T	R	N	N	N	V	V	L	E	S	S	T	I	A	P	K	K	R	R	Q	M	N	K	S
A/chicken/Jiangxi/13220/2014	E	V	K	T	I	V	M	V	K	I	D	A	V	K	E	K	V	A	M	D	S	T	I	A	R	T	R	N	N	N	V	V	L	E	S	S	T	I	A	P	K	K	R	R	Q	M	N	K	G
A/chicken/Jiangxi/13223/2014	E	V	K	T	I	V	M	V	K	I	D	A	V	K	E	K	V	A	M	D	S	T	I	A	R	T	R	N	N	N	V	V	L	E	S	S	T	I	A	P	K	K	R	R	Q	M	N	K	S
A/chicken/Jiangxi/13230/2014	E	V	K	T	I	V	M	V	K	I	D	A	V	K	E	K	V	A	M	D	S	T	I	A	R	T	R	N	N	N	V	V	L	E	R	S	T	I	A	P	K	K	R	R	L	-	-	-	S
A/chicken/Jiangxi/13250/2014	E	V	K	T	I	V	M	V	K	I	D	A	V	K	E	K	V	A	M	D	S	T	I	A	R	T	R	N	N	N	V	V	L	E	S	S	T	I	A	P	K	K	R	R	L	I	D	K	G
A/chicken/Jiangxi/13252/2014	E	V	K	T	I	V	M	V	K	I	D	A	V	K	E	K	V	A	M	D	S	T	I	A	R	T	R	N	N	N	V	V	L	E	S	S	T	I	A	P	K	K	R	R	Q	M	N	R	S
A/chicken/Jiangxi/13255/2014	E	V	K	T	I	V	M	V	K	I	D	A	V	K	E	K	V	A	M	D	S	T	I	A	R	T	R	N	N	N	V	V	L	E	R	S	T	I	A	P	K	K	R	R	Q	M	N	R	S
A/chicken/Jiangxi/13268/2014	E	V	K	T	I	V	M	V	K	I	D	A	V	K	E	K	V	A	M	D	S	T	I	V	K	T	R	N	D	N	V	V	L	E	R	S	T	I	V	P	K	K	K	R	Q	M	N	R	G
A/chicken/Jiangxi/13269/2014	E	V	K	T	I	V	M	V	K	I	D	A	V	K	E	K	V	A	M	D	S	T	I	A	R	T	R	N	N	N	V	V	L	E	S	S	T	I	A	P	K	K	R	R	Q	M	N	R	S
A/chicken/Jiangxi/13491/2014	E	V	K	T	I	V	M	V	K	I	D	A	V	K	E	K	V	A	M	D	S	T	I	A	R	T	R	N	N	N	V	V	L	E	R	S	T	I	A	P	K	K	R	R	Q	M	N	R	G
A/chicken/Jiangxi/13493/2014	E	V	K	T	I	V	M	V	K	I	D	A	V	K	E	K	V	A	M	D	S	T	I	V	K	T	R	N	D	S	V	V	L	E	R	S	T	I	V	P	K	K	K	R	Q	M	N	R	S
A/chicken/Jiangxi/13496/2014	E	V	K	T	I	V	M	V	K	I	D	A	V	K	E	K	V	A	M	D	S	T	I	V	K	T	R	N	D	N	V	V	L	E	R	S	T	I	V	P	K	K	K	R	Q	M	N	R	S
A/chicken/Jiangxi/13502/2014	E	V	K	T	I	V	M	V	K	I	D	A	V	K	E	K	V	A	M	D	S	T	I	A	R	T	R	N	N	N	V	V	L	-	-	S	T	I	A	P	K	K	R	R	Q	M	N	R	S
A/chicken/Jiangxi/13507/2014	E	V	K	T	I	V	M	V	K	I	D	A	V	K	E	K	V	A	M	D	S	T	I	A	R	T	R	N	N	N	V	V	L	E	S	S	T	I	A	P	K	K	R	R	Q	M	N	R	S
A/chicken/Jiangxi/13510/2014	E	V	K	T	I	V	M	V	K	I	D	A	V	K	E	K	V	A	M	D	S	T	I	A	R	T	R	N	N	N	V	V	L	E	R	S	T	I	A	P	K	K	R	R	Q	M	N	R	G
A/chicken/Jiangxi/13512/2014	E	V	K	T	I	V	M	V	K	I	D	A	V	K	E	K	V	A	M	D	S	T	I	V	K	T	R	N	D	S	V	V	L	E	R	S	T	I	V	P	K	K	K	R	Q	M	N	R	S
A/chicken/Jiangxi/13513/2014	E	V	K	T	I	V	M	V	K	I	D	A	V	K	E	K	V	A	M	D	S	T	I	V	K	T	R	N	D	S	V	V	L	E	R	S	T	I	V	P	K	K	K	R	L	I	D	K	S
A/chicken/Jiangxi/13518/2014	E	V	K	T	I	V	M	V	K	I	D	A	V	K	E	K	V	A	M	D	S	T	I	V	K	T	R	N	D	N	V	V	L	E	R	S	T	I	V	P	K	K	K	R	L	I	D	K	S
A/chicken/Jiangxi/13519/2014	E	V	K	T	I	V	M	V	K	I	D	A	V	K	E	K	V	A	M	D	S	T	I	A	R	T	R	N	N	N	V	V	L	E	R	S	T	I	A	P	K	K	R	R	L	I	D	K	G
A/chicken/Jiangxi/13521/2014	E	V	K	T	I	V	M	V	K	I	D	A	V	K	E	K	V	A	M	D	S	T	I	V	K	T	R	N	D	S	V	V	L	E	R	S	T	I	V	P	K	K	K	R	L	I	D	K	S
A/chicken/Jiangxi/13524/2014	E	V	K	T	I	V	M	V	K	I	D	A	V	K	E	K	V	A	M	D	S	T	I	V	K	T	R	N	D	S	V	V	L	E	R	S	T	I	V	P	K	K	K	R	L	I	D	K	S
A/chicken/Jiangxi/13530/2014	E	V	K	T	I	V	M	V	K	I	D	A	V	K	E	K	V	A	M	D	S	T	I	A	R	T	R	N	N	N	V	V	L	E	R	S	T	I	A	P	K	K	R	R	L	I	D	K	G
A/chicken/Jiangxi/13536/2014	E	V	K	T	I	V	M	V	K	I	D	A	V	K	E	K	V	A	M	D	S	T	I	A	R	T	R	N	N	N	V	V	L	E	R	S	T	I	A	P	K	K	R	R	L	I	D	K	G
A/chicken/Jiangxi/13537/2014	E	V	K	T	I	V	M	V	K	I	D	A	V	K	E	K	V	A	M	D	S	T	I	V	K	T	R	N	D	N	V	V	L	E	R	S	T	I	V	P	K	K	K	R	L	I	D	K	S
A/chicken/Jiangxi/13538/2014	E	V	K	T	I	V	M	V	K	I	D	A	V	K	E	K	V	A	M	D	S	T	I	V	K	T	R	N	D	S	V	V	L	E	R	S	T	I	V	P	K	K	K	R	L	I	D	K	S
A/chicken/Jiangxi/13543/2014	E	V	K	T	I	V	M	V	K	I	D	A	V	K	E	K	V	A	M	D	S	T	I	V	K	T	R	N	D	S	V	V	L	E	R	S	T	I	V	P	K	K	K	R	Q	M	N	R	S
A/chicken/Jiangxi/13544/2014	E	V	K	T	I	V	M	V	K	I	D	A	V	K	E	K	V	A	M	D	S	T	I	A	R	T	R	N	N	N	V	V	L	E	R	S	T	I	A	P	K	K	R	R	Q	M	N	R	G
A/chicken/Jiangxi/13546/2014	E	V	K	T	I	V	M	V	K	I	D	A	V	K	E	K	V	A	M	D	S	T	I	V	K	T	R	N	D	S	V	V	L	E	R	S	T	I	V	P	K	K	K	R	Q	M	N	R	S
A/chicken/Jiangxi/13548/2014	E	V	K	T	I	V	M	V	K	I	D	A	V	K	E	K	V	A	M	D	S	T	I	V	K	T	R	N	D	S	V	V	L	E	R	S	T	I	V	P	K	K	K	R	Q	M	N	R	S
A/chicken/Jiangxi/13551/2014	E	V	K	T	I	V	M	V	K	I	D	A	V	K	E	K	V	A	M	D	S	T	I	A	R	T	R	N	N	N	V	V	L	E	R	S	T	I	A	P	K	K	R	R	Q	M	N	R	G
A/chicken/Jiangxi/13553/2014	E	V	K	T	I	V	M	V	R	I	D	A	V	K	E	K	V	A	M	D	S	T	I	A	R	T	R	N	N	N	V	V	L	E	R	S	T	I	A	P	K	K	R	R	Q	M	N	R	G
A/chicken/Jiangxi/13556/2014	E	V	K	T	I	V	M	V	K	I	D	A	V	K	E	K	V	A	M	D	S	T	I	A	R	T	R	N	N	N	V	V	L	E	R	S	T	I	A	P	K	K	R	R	Q	M	N	R	G
A/chicken/Jiangxi/13564/2014	E	V	K	T	I	V	M	V	K	I	D	A	V	K	E	K	V	A	M	D	S	T	I	A	R	T	R	N	N	N	V	V	L	E	R	S	T	I	A	P	K	K	R	R	Q	M	N	R	G
A/chicken/Jiangxi/14023/2014	E	V	K	T	I	V	M	V	K	I	D	A	V	K	E	K	V	A	M	D	S	T	I	V	K	T	R	N	D	S	V	V	L	E	R	S	T	I	V	P	K	K	K	R	Q	M	N	R	S
A/chicken/Jiangxi/14033/2014	E	V	K	T	I	V	M	V	K	I	D	A	V	K	E	K	V	A	M	D	S	T	I	A	R	T	R	N	N	N	V	V	L	E	S	S	T	I	A	P	K	K	R	R	Q	M	N	R	S
A/chicken/Jiangxi/14479/2014	E	V	K	T	I	V	M	V	K	I	D	A	V	K	E	K	V	A	M	D	S	T	I	A	R	T	R	N	N	N	V	V	L	E	S	S	T	I	A	P	K	K	R	R	Q	M	N	R	S
A/chicken/Jiangxi/14482/2014	E	V	K	T	I	V	M	V	K	I	D	A	V	K	E	K	V	A	M	D	S	T	I	V	K	T	R	N	D	S	V	V	L	E	R	S	T	I	V	P	K	K	K	R	L	I	D	K	S
A/chicken/Jiangxi/14513/2014	E	V	K	T	I	V	M	V	K	I	D	A	V	K	E	K	V	A	M	D	S	T	I	V	K	T	R	N	D	S	V	V	L	E	R	S	T	I	V	P	K	K	K	K	L	I	D	K	S
A/chicken/Jiangxi/14515/2014	E	V	K	T	I	V	M	V	K	I	D	A	V	K	E	K	V	A	M	D	S	T	I	A	R	T	R	N	N	N	V	V	L	E	R	S	T	I	A	P	K	K	R	R	L	I	D	K	G
A/chicken/Jiangxi/14517/2014	E	V	K	T	I	V	M	V	K	I	D	A	V	K	E	K	V	A	M	D	S	T	I	A	R	T	R	N	N	N	V	V	L	E	S	S	T	I	A	P	K	K	R	R	Q	-	-	-	G
A/chicken/Jiangxi/14518/2014	E	V	K	T	I	V	M	V	K	I	D	A	V	K	E	K	V	A	M	D	S	T	I	V	K	T	R	N	D	S	V	V	L	E	R	S	T	I	V	P	K	K	K	R	Q	M	N	R	S
A/chicken/Jiangxi/14530/2014	E	V	K	T	I	V	M	V	K	I	D	A	V	K	E	K	V	A	M	D	S	T	I	V	K	T	R	N	D	S	V	V	L	E	R	S	T	I	V	P	K	K	K	R	Q	M	N	R	S
A/chicken/Jiangxi/14554/2014	E	V	K	T	I	V	M	V	K	I	D	A	V	K	E	K	V	A	M	D	S	T	I	A	R	T	R	N	N	N	V	V	L	E	S	S	T	I	A	P	K	K	R	R	Q	M	N	R	S
A/chicken/Jiangxi/15524/2014	E	V	K	T	I	V	M	V	K	I	D	A	V	K	E	K	V	A	M	D	S	T	I	A	R	T	R	N	N	N	V	V	L	E	S	S	T	I	A	P	K	K	R	R	Q	M	N	R	S
A/chicken/Jiangxi/18008/2014	E	V	K	N	I	V	M	V	K	I	D	A	V	K	E	K	V	A	M	D	S	T	I	V	R	T	R	N	D	N	V	V	L	E	R	S	T	I	V	Q	K	K	K	R	Q	M	N	R	S
A/chicken/Jiangxi/18449/2014	E	V	K	T	I	V	M	A	K	I	D	A	V	K	E	K	I	A	M	D	S	T	I	V	K	T	R	N	D	S	V	V	L	E	R	S	T	I	V	P	K	K	K	R	Q	M	N	R	S
A/chicken/Jiangxi/18482/2014	E	V	K	T	I	V	M	V	K	I	D	A	V	K	E	K	V	A	M	D	S	T	I	V	K	T	R	N	D	S	V	V	L	E	R	S	T	I	V	P	K	K	K	R	Q	M	N	R	S
A/chicken/Jiangxi/18487/2014	E	V	K	T	I	V	M	V	K	I	D	A	V	K	E	K	V	A	M	D	S	T	I	V	K	T	R	N	D	S	V	V	L	E	R	S	T	I	V	P	K	K	K	R	Q	M	N	R	S
A/chicken/Jiangxi/18513/2014	E	V	K	T	I	V	M	V	K	I	D	A	V	K	E	K	V	A	M	D	S	T	I	A	R	T	R	N	N	N	V	V	L	E	S	S	T	I	A	P	K	K	R	R	Q	M	N	R	S
A/chicken/Jiangxi/18515/2014	E	V	K	T	I	V	M	V	K	I	D	A	V	K	E	K	V	A	M	D	S	T	I	V	K	T	R	N	D	S	V	V	L	E	R	S	T	I	V	P	K	K	K	R	Q	M	N	R	S
A/chicken/Jiangxi/9497/2014	E	V	K	T	I	V	M	A	K	I	D	A	V	K	E	K	I	A	M	D	S	T	I	V	K	T	R	N	D	N	V	V	L	E	R	S	T	I	V	P	K	K	K	K	Q	I	D	K	S
A/chicken/Jiangxi/9508/2014	E	V	K	T	I	V	M	A	K	I	D	A	V	K	E	K	I	A	M	D	S	T	I	V	K	T	R	N	D	N	V	V	L	E	R	S	T	I	V	P	K	K	K	R	L	-	-	-	S
A/chicken/Jiangxi/9513/2014	E	V	K	T	I	V	M	A	K	I	D	A	V	K	E	K	I	A	M	D	S	T	I	V	R	T	K	N	D	N	V	V	L	E	R	S	T	I	V	P	K	K	K	R	L	I	D	K	S
A/chicken/Jiangxi/9530/2014	E	V	K	T	I	V	M	A	K	I	D	A	V	K	E	K	I	A	M	D	S	T	I	V	K	T	R	N	D	N	V	V	L	E	R	S	T	I	V	P	K	K	K	R	L	I	D	K	S
A/chicken/Jiangxi/9534/2014	E	V	K	T	I	V	M	A	K	I	D	A	V	K	E	K	I	A	M	D	S	T	I	V	K	T	R	N	D	N	V	V	L	E	R	S	T	I	V	P	K	K	K	K	L	I	D	K	S
A/chicken/Jiangxi/9558/2014	E	V	K	T	I	V	M	A	K	I	D	A	V	K	E	K	I	A	M	D	S	T	I	V	K	T	R	N	D	N	V	V	L	E	R	S	T	I	V	P	K	K	K	K	L	I	D	K	S
A/chicken/Shantou/1550/2014	E	V	K	T	M	V	M	V	K	I	D	A	V	K	E	K	I	A	M	D	S	T	I	V	R	T	K	N	D	N	V	V	L	E	R	S	T	I	V	P	K	K	K	R	Q	I	D	K	S
A/chicken/Shantou/1552/2014	E	V	K	T	M	V	M	V	K	I	D	A	V	K	E	K	I	A	M	D	S	T	I	V	R	T	K	N	D	N	V	V	L	E	R	S	T	I	V	P	K	K	K	K	L	I	D	K	S
A/chicken/Shantou/1554/2014	E	V	K	T	M	V	M	V	K	I	D	A	V	K	E	K	I	A	M	D	S	T	I	V	R	T	K	N	D	N	V	V	L	E	R	S	T	I	V	P	K	K	K	K	L	I	D	K	S
A/chicken/Shantou/1556/2014	E	V	K	T	M	V	M	V	K	I	D	A	V	K	E	K	I	A	M	D	S	T	I	V	R	T	K	N	D	N	V	V	L	E	R	S	T	I	V	P	K	K	K	K	L	I	D	K	S
A/chicken/Shantou/2537/2014	E	V	K	T	M	V	M	V	K	I	D	A	V	K	E	K	I	A	M	D	S	T	I	V	R	T	K	N	D	N	V	V	L	E	R	S	T	I	V	P	K	K	K	K	L	I	D	K	S
A/chicken/Shantou/2538/2014	E	V	K	T	M	V	M	V	K	I	D	A	V	K	E	K	I	A	M	D	S	T	I	V	R	T	K	N	D	N	V	V	L	E	R	S	T	I	V	P	K	K	K	K	L	I	D	K	S
A/chicken/Shantou/2539/2014	E	V	K	T	M	V	M	V	K	I	D	A	V	K	E	K	I	A	M	D	S	T	I	V	R	T	K	N	D	N	V	V	L	E	R	S	T	I	V	P	K	K	K	K	L	I	D	K	S
A/chicken/Shantou/2546/2014	E	V	K	T	M	V	M	V	K	I	D	A	V	K	E	K	I	A	M	D	S	T	I	V	R	T	K	N	D	N	V	V	L	E	R	S	T	I	V	P	K	K	K	K	L	I	D	K	S
A/chicken/Shantou/2550/2014	E	V	K	T	M	V	M	V	K	I	D	A	V	K	E	K	I	A	M	D	S	T	I	V	R	T	K	N	D	N	V	V	L	E	R	S	T	I	V	P	K	K	K	K	L	I	D	K	S
A/chicken/Shantou/2556/2014	E	V	K	T	M	V	M	V	K	I	D	A	V	K	E	K	I	A	M	D	S	T	I	V	R	T	K	N	D	N	V	V	L	E	R	S	T	I	V	P	K	K	K	K	L	I	D	K	S
A/chicken/Shantou/2562/2014	E	V	K	T	M	V	M	V	K	I	D	A	V	K	E	K	I	A	M	D	S	T	I	V	R	T	K	N	D	N	V	V	L	E	R	S	T	I	V	P	K	K	K	K	L	I	D	K	S
A/chicken/Shantou/3057/2014	E	V	K	T	M	V	M	V	K	I	D	A	V	K	E	K	I	A	M	D	S	T	I	V	R	T	K	N	D	N	V	V	L	E	R	S	T	I	V	P	K	K	K	K	L	I	D	K	S
A/chicken/Shantou/4325/2014	E	V	K	T	I	V	M	V	K	I	D	A	V	K	E	K	I	A	M	D	S	T	I	V	R	T	R	N	D	N	V	V	L	E	R	S	T	I	V	Q	K	K	K	K	L	I	D	K	S
A/chicken/Shantou/4816/2014	E	V	K	T	I	V	I	V	K	I	D	A	V	K	E	K	I	A	M	D	S	T	I	V	K	T	R	N	D	N	V	V	L	E	R	S	T	I	V	P	K	K	K	K	L	I	D	K	S
A/chicken/Shantou/4824/2014	E	V	K	T	I	V	I	V	K	I	D	A	V	K	E	K	I	A	M	D	S	T	I	A	R	T	R	N	N	N	V	V	L	E	R	S	T	I	A	L	K	K	R	K	L	I	D	K	S
A/chicken/Shantou/4832/2014	E	V	K	T	M	V	M	V	K	I	D	A	V	K	E	K	I	A	M	D	S	T	I	V	R	T	R	N	D	N	V	V	L	E	R	S	T	I	V	Q	K	K	K	K	L	I	D	K	S
A/chicken/Shantou/4833/2014	E	V	K	T	M	V	M	V	K	I	D	A	V	K	E	K	I	A	M	D	S	T	I	V	R	T	R	N	D	N	V	V	L	E	R	S	T	I	V	Q	K	K	K	K	L	I	D	K	S
A/chicken/Shenzhen/138/2014	E	V	K	T	I	V	V	V	K	I	D	A	V	K	E	K	I	A	M	D	S	T	I	A	R	T	R	N	N	N	V	V	L	E	R	S	T	I	A	L	K	K	R	K	L	I	D	K	S
A/chicken/Zhangzhou/8585/2014	E	V	K	T	I	V	M	V	K	I	D	A	V	K	E	K	V	A	V	D	S	T	I	A	R	T	R	N	N	N	V	V	L	E	S	S	T	I	A	P	K	K	R	K	L	I	D	K	S
A/chicken/Zhangzhou/8829/2014	E	V	K	T	I	V	M	A	K	I	D	A	V	K	E	K	I	A	M	D	S	T	I	A	R	T	R	N	N	N	V	V	L	E	S	S	T	I	A	P	K	K	R	K	L	I	D	K	S
A/duck/Jiangxi/15044/2014	E	V	K	T	I	V	M	V	K	I	D	A	V	K	E	K	V	A	M	D	S	T	I	A	R	T	R	N	N	N	V	V	L	E	S	S	T	I	A	P	K	K	R	K	L	I	D	K	S
A/silkie_chicken/Dongguan/1264/2014	E	V	K	T	I	V	V	V	K	I	D	A	V	K	E	K	I	A	M	D	S	T	I	V	R	T	R	N	D	S	V	V	L	E	G	S	T	I	V	L	K	K	K	K	L	I	D	K	S
A/silkie_chicken/Dongguan/1268/2014	E	V	K	T	I	V	V	V	K	I	D	A	V	K	E	K	I	A	M	D	S	T	I	V	R	T	R	N	D	S	V	V	L	E	G	S	T	I	V	L	K	K	K	K	L	I	D	K	S
A/silkie_chicken/Dongguan/1271/2014	E	V	K	T	I	V	V	V	K	I	D	A	V	K	E	K	I	A	M	D	S	T	I	V	R	T	R	N	D	S	V	V	L	E	G	S	T	I	V	L	K	K	K	K	L	I	D	K	S
A/silkie_chicken/Dongguan/1274/2014	E	V	K	T	I	V	V	V	K	I	D	A	V	K	E	K	I	A	M	D	S	T	I	V	R	T	R	N	D	S	V	V	L	E	G	S	T	I	V	L	K	K	K	K	L	I	D	K	S
A/silkie_chicken/Dongguan/1448/2014	E	V	K	T	I	V	V	V	K	I	D	A	V	K	E	K	I	A	M	D	S	T	I	V	R	T	K	N	D	N	V	V	L	E	R	S	T	I	V	P	K	K	K	K	L	I	D	K	S
A/silkie_chicken/Dongguan/1450/2014	E	V	K	T	I	V	V	V	K	I	D	A	V	K	E	K	I	A	M	D	S	T	I	V	R	T	K	N	D	N	V	V	L	E	R	S	T	I	V	P	K	K	K	K	L	I	D	K	S
A/silkie_chicken/Dongguan/1451/2014	E	V	K	T	M	V	M	V	K	I	D	A	V	K	E	K	I	A	M	D	S	T	I	V	R	T	K	N	D	N	V	V	L	E	R	S	T	I	V	P	K	K	K	K	L	I	D	K	S
A/silkie_chicken/Dongguan/1516/2014	E	V	K	T	I	V	V	V	K	I	D	A	V	K	E	K	I	A	M	D	S	T	I	V	R	T	R	N	D	S	V	V	L	E	G	S	T	I	V	L	K	K	K	R	L	I	D	K	S
A/silkie_chicken/Dongguan/1519/2014	E	V	K	T	I	V	V	V	K	I	D	A	V	K	E	K	I	A	M	D	S	T	I	A	R	T	R	N	N	N	V	V	L	E	R	S	T	I	A	L	K	K	R	R	L	I	D	K	S
A/silkie_chicken/Dongguan/157/2014	E	V	K	T	I	V	V	V	K	I	D	A	V	K	E	K	I	A	M	D	S	T	I	V	R	T	K	N	D	N	V	V	L	E	R	S	T	I	V	P	K	K	K	R	L	I	D	K	S
A/silkie_chicken/Dongguan/1641/2014	E	V	K	T	I	V	V	V	K	I	D	A	V	K	E	K	I	A	M	D	S	T	I	A	R	T	R	N	N	N	V	V	L	E	R	S	T	I	A	L	K	K	R	R	L	I	D	K	S
A/silkie_chicken/Dongguan/523/2014	E	V	K	T	I	V	V	V	K	I	D	A	V	K	E	K	I	A	M	D	S	T	I	V	R	T	R	N	D	S	V	V	L	E	G	S	T	I	V	L	K	K	K	R	L	I	D	K	S
A/silkie_chicken/Dongguan/635/2014	E	V	K	T	I	V	V	V	K	I	D	A	V	K	E	K	I	A	M	D	S	T	I	V	R	T	K	N	D	N	V	V	L	E	R	S	T	I	V	P	K	K	K	R	L	I	D	K	S
A/silkie_chicken/Dongguan/656/2014	E	V	K	T	I	V	V	V	K	I	D	A	V	K	E	K	I	A	M	D	S	T	I	V	K	T	R	N	D	N	V	V	L	E	R	S	T	I	V	L	K	K	K	R	L	I	D	K	S
A/silkie_chicken/Dongguan/953/2014	E	V	K	T	I	V	V	V	K	I	D	A	V	K	E	K	I	A	M	D	S	T	I	V	R	T	K	N	D	N	V	V	L	E	R	S	T	I	V	P	K	K	K	R	L	I	D	K	S
A/silkie_chicken/Dongguan/963/2014	E	V	K	T	I	V	V	V	K	I	D	A	V	K	E	K	I	A	M	D	S	T	I	V	R	T	K	N	D	N	V	V	L	E	R	S	T	I	V	P	K	K	K	R	L	I	D	K	S
A/silkie_chicken/Dongguan/967/2014	E	V	K	T	I	V	V	V	K	I	D	A	V	K	E	K	I	A	M	D	S	T	I	V	R	T	K	N	D	N	V	V	L	E	R	S	T	I	V	P	K	K	K	R	L	I	D	K	S
A/silkie_chicken/Dongguan/969/2014	E	V	K	T	I	V	M	V	K	I	D	A	V	K	E	K	V	A	M	D	S	T	I	A	R	T	R	N	N	N	V	V	L	E	S	S	T	I	A	P	K	K	R	R	L	I	D	K	S
A/silkie_chicken/Dongguan/979/2014	E	V	K	T	M	V	M	V	K	I	D	A	V	K	E	K	I	A	M	D	S	T	I	V	R	T	K	N	D	N	V	V	L	E	R	S	T	I	V	P	K	K	K	R	L	I	D	K	S
A/silkie_chicken/Dongguan/981/2014	E	V	K	T	M	V	M	V	K	I	D	A	V	K	E	K	I	A	M	D	S	T	I	V	R	T	K	N	D	N	V	V	L	E	R	S	T	I	V	P	K	K	K	K	L	I	D	K	S
A/silkie_chicken/Dongguan/986/2014	E	V	K	T	M	V	M	V	K	I	D	A	V	K	E	K	I	A	M	D	S	T	I	V	R	T	K	N	D	N	V	V	L	E	R	S	T	I	V	P	K	K	K	K	L	I	D	K	S
A/silkie_chicken/Dongguan/988/2014	E	V	K	T	M	V	M	V	K	I	D	A	V	K	E	K	I	A	M	D	S	T	I	V	R	T	K	N	D	N	V	V	L	E	R	S	T	I	V	P	K	K	K	K	L	I	D	K	S
A/silkie_chicken/Dongguan/991/2014	E	V	K	T	I	V	M	V	K	I	D	A	V	K	E	K	V	A	M	D	S	T	I	A	R	T	R	N	N	N	V	V	L	E	S	S	T	I	A	P	K	K	R	K	L	I	D	K	S
A/silkie_chicken/Dongguan/997/2014	E	V	K	T	M	V	M	V	K	I	D	A	V	K	E	K	I	A	M	D	S	T	I	A	R	T	R	N	N	N	V	V	L	E	R	S	T	I	A	L	K	K	R	K	L	I	D	K	S
A/silkie_chicken/Jiangxi/9469/2014	E	V	K	T	I	V	M	A	K	I	D	A	V	K	E	K	I	A	M	D	S	T	I	V	K	T	R	N	D	N	V	V	L	E	R	S	T	I	V	P	K	K	K	K	L	I	D	K	S
A/silkie_chicken/Jiangxi/9472/2014	E	V	K	T	I	V	M	A	K	I	D	A	V	K	E	K	I	A	M	D	S	T	I	V	K	T	R	N	D	N	V	V	L	E	R	S	T	I	V	P	K	K	K	K	L	I	D	K	S
A/silkie_chicken/Jiangxi/9476/2014	E	V	K	T	I	V	M	A	K	I	D	A	V	K	E	K	I	A	M	D	S	T	I	V	K	T	R	N	D	N	V	V	L	E	R	S	T	I	V	P	K	K	K	K	L	I	D	K	S
A/silkie_chicken/Shantou/1406/2014	E	V	K	T	I	V	V	V	K	I	D	A	V	K	E	K	I	A	M	D	S	T	I	V	R	T	K	N	D	N	V	V	L	E	R	S	T	I	V	P	K	K	K	K	L	I	D	K	S
A/silkie_chicken/Shantou/2050/2014	E	V	K	T	M	V	M	V	K	I	D	A	V	K	E	K	I	A	M	D	S	T	I	V	R	T	K	N	D	N	V	V	L	E	R	S	T	I	V	P	K	K	K	K	L	I	D	K	S
A/silkie_chicken/Shantou/2054/2014	E	V	K	T	M	V	M	V	K	I	D	A	V	K	E	K	I	A	M	D	S	T	I	V	R	T	K	N	D	N	V	V	L	E	R	S	T	I	V	P	K	K	K	K	L	I	D	K	S
A/silkie_chicken/Shantou/2056/2014	E	V	K	T	M	V	M	V	K	I	D	A	V	K	E	K	I	A	M	D	S	T	I	V	R	T	K	N	D	N	V	V	L	E	R	S	T	I	V	P	K	K	K	R	L	I	D	K	S
A/chicken/Huai'an/003/2015	E	V	K	T	I	V	M	V	K	I	D	A	V	K	E	K	V	A	M	D	S	T	I	A	R	T	R	N	N	N	V	V	L	E	R	S	T	I	A	P	K	K	R	R	L	I	D	K	S
A/chicken/Taizhou/TZJF02/2015	E	V	K	T	I	V	M	V	K	I	D	A	V	K	E	K	I	A	M	D	S	T	I	A	K	A	R	N	N	N	V	V	L	E	R	S	T	I	A	P	K	K	R	R	L	I	D	K	S
A/chicken/Wenzhou/HATSLG01/2015	E	V	K	T	I	V	I	V	K	I	D	A	V	K	E	K	V	A	M	D	S	T	I	A	R	T	R	N	N	N	V	V	L	E	R	S	T	I	A	P	K	K	R	K	L	I	D	K	S
A/chicken/Wenzhou/RAQL18/2015	E	V	K	T	I	V	X	V	K	I	N	A	V	K	E	K	V	A	M	D	S	T	I	V	R	T	R	N	D	N	V	V	L	E	R	S	T	I	V	P	K	K	K	K	L	I	D	K	S
A/chicken/Wenzhou/WZTSLG02/2015	E	V	K	T	I	V	I	V	K	I	D	A	V	K	E	K	V	A	M	D	S	T	I	A	R	T	R	N	N	N	V	V	L	E	R	S	T	I	A	P	K	K	R	K	L	I	D	K	S
A/duck/Wenzhou/RAQL10/2015	E	V	K	T	I	V	X	V	K	I	D	A	V	K	E	K	V	A	M	D	S	T	I	V	R	T	R	N	D	N	V	V	L	E	R	S	T	I	V	P	K	K	K	K	L	I	D	K	S
A/duck/Wenzhou/YJYF24/2015	E	V	K	T	I	V	M	V	K	I	D	A	V	K	E	K	V	A	M	D	S	T	I	A	R	T	R	N	N	N	V	V	L	E	R	S	T	I	A	P	K	K	R	K	L	I	D	K	S
A/chicken/Ganzhou/GZ79/2016	E	I	K	T	I	V	M	V	K	I	D	A	V	K	E	K	I	A	M	D	S	I	I	A	R	T	R	N	N	N	V	V	L	E	R	S	T	I	A	P	K	K	R	R	Q	M	N	R	S
A/chicken/Longquan/LQ78/2016	E	V	K	T	M	V	V	V	K	I	D	T	V	K	E	K	I	A	M	D	S	T	I	V	R	T	R	N	D	N	V	V	L	E	R	S	T	I	V	P	K	K	K	K	L	I	D	K	S
	K	V	K	N	M	V	M	V	K	I	D	A	V	K	E	K	V	A	M	D	S	T	I	A	R	T	R	N	N	N	V	V	L	E	R	S	T	I	A	L	K	K	R	R	L	I	D	K	S
B) Human strains (full-length)
Strain Namea/ Accession no.b	A2H Substitutionc
	PB2							PB1													PA															PAX								HA					NP
	191	292	389	559	570	648	676	14	48	113	172	257	368	383	387	430	525	573	628	638	37	61	63	100	262	337	356	388	394	409	423	554	607	684	716	37	61	63	100	194	195	199	248	65	235	427	455	462	34
	E	I	R	T	I	L	T	A	Q	V	E	T	I	E	K	R	I	S	L	E	A	I	V	V	K	A	K	S	D	S	I	I	M	G	K	A	I	V	V	P	R	R	K	K	Q	M	N	R	G
A/Anhui/1_DEWH730/2013	K	V	K	N	M	V	M	V	K	I	D	A	V	K	E	K	V	A	M	D	S	T	I	A	R	T	R	N	N	N	V	V	L	E	R	S	T	I	A	L	K	K	R	K	L	I	D	K	S
A/Anhui/DEWH72_01/2013	K	V	K	N	M	V	M	V	K	I	D	A	V	K	E	K	V	A	M	D	S	T	I	A	R	T	R	N	N	N	V	V	L	E	R	S	T	I	A	L	K	K	R	K	L	I	D	K	S
A/Anhui/DEWH72_02/2013	K	V	K	N	M	V	M	V	K	I	D	A	V	K	E	K	V	A	M	D	S	T	I	A	R	T	R	N	N	N	V	V	L	E	R	S	T	I	A	L	K	K	R	R	L	I	D	K	S
A/Anhui/DEWH72_03/2013	K	V	K	N	M	V	M	V	K	I	D	A	V	K	E	K	V	A	M	D	S	T	I	A	R	T	R	N	N	N	V	V	L	E	R	S	T	I	A	L	K	K	R	K	L	I	D	K	S
A/Anhui/DEWH72_04/2013	K	V	K	N	M	V	M	V	K	I	D	A	V	K	E	K	V	A	M	D	S	T	I	A	R	T	R	N	N	N	V	V	L	E	R	S	T	I	A	L	K	K	R	K	L	I	D	K	S
A/Anhui/DEWH72_05/2013	K	V	K	N	M	V	M	V	K	I	D	A	V	K	E	K	V	A	M	D	S	T	I	A	R	T	R	N	N	N	V	V	L	E	R	S	T	I	A	L	K	K	R	R	L	I	D	K	S
A/Anhui/DEWH72_06/2013	K	V	K	N	M	V	M	V	K	I	D	A	V	K	E	K	V	A	M	D	S	T	I	A	R	T	R	N	N	N	V	V	L	E	R	S	T	I	A	L	K	K	R	R	L	I	D	K	S
A/Anhui/DEWH72_07/2013	K	V	K	N	M	V	M	V	K	I	D	A	V	K	E	K	V	A	M	D	S	T	I	A	R	T	R	N	N	N	V	V	L	E	R	S	T	I	A	L	K	K	R	R	L	I	D	K	S
A/Anhui/DEWH72_08/2013	K	V	K	N	M	V	M	V	K	I	D	A	V	K	E	K	V	A	M	D	S	T	I	A	R	T	R	N	N	N	V	V	L	E	R	S	T	I	A	L	K	K	R	K	L	I	D	K	S
A/Anhui/DEWH72_09/2013	K	V	K	N	M	V	M	V	K	I	D	A	V	K	E	K	V	A	M	D	S	T	I	A	R	T	R	N	N	N	V	V	L	E	R	S	T	I	A	L	K	K	R	K	L	I	D	K	S
A/Beijing/1/2013	E	V	K	N	M	V	M	V	K	I	D	A	V	K	E	K	V	A	M	D	S	T	I	A	R	T	R	N	N	N	V	V	L	E	R	S	T	I	A	L	K	K	R	K	L	I	D	K	S
A/Beijing/2/2013	K	V	K	N	M	V	M	V	K	I	D	A	V	K	E	K	V	A	M	D	S	T	I	A	R	T	R	N	N	N	V	V	L	E	R	S	T	I	A	L	K	K	R	K	L	I	D	K	S
A/Beijing/3/2013	K	V	K	N	M	V	M	V	K	I	D	A	V	K	E	K	V	A	M	D	S	T	I	A	R	T	R	N	N	N	V	V	L	E	R	S	T	I	A	L	K	K	R	K	L	I	D	K	S
A/Changsha/1/2013	K	V	K	N	M	V	M	V	K	I	D	A	V	K	E	K	I	A	M	D	S	T	I	A	R	T	R	N	N	N	V	V	L	E	R	S	T	I	A	L	K	K	R	K	L	I	D	K	S
A/Changsha/2/2013	K	V	K	N	M	V	M	V	K	I	D	A	V	K	E	K	I	A	M	D	S	T	I	A	R	T	R	N	N	N	V	V	L	E	R	S	T	I	A	L	K	K	R	K	L	I	D	K	S
A/Fujian/1/2013	K	V	K	N	M	V	M	V	K	I	D	-	-	-	-	-	-	-	-	-	S	T	I	A	R	T	R	N	N	N	V	V	L	E	R	S	T	I	A	L	K	K	R	K	L	I	D	K	S
A/Guangdong/05/2013	E	V	K	T	I	V	V	V	K	I	D	-	-	-	-	-	-	-	-	-	S	T	I	V	R	T	K	N	D	N	V	V	L	E	R	S	T	I	V	P	K	K	K	K	L	I	D	K	S
A/Guangdong/1/2013	E	V	K	T	I	V	V	V	K	I	D	A	V	K	E	K	I	A	M	D	S	T	I	A	R	T	R	N	N	N	V	V	L	E	R	S	T	I	A	L	K	K	R	K	L	I	D	K	S
A/Guangdong/6/2013	E	V	K	T	I	V	V	V	K	I	D	A	V	K	E	K	I	A	M	D	S	T	I	V	R	T	K	N	D	N	V	V	L	E	R	S	T	I	V	P	K	K	K	K	L	I	D	K	S
A/Guangdong/7/2013	E	V	K	T	I	V	V	V	K	I	D	-	-	-	-	-	-	-	-	-	S	T	I	V	R	T	K	N	D	N	V	V	L	E	R	S	T	I	V	P	K	K	K	K	L	I	D	K	S
A/Hangzhou/1/2013	K	V	K	N	M	V	M	V	K	I	D	A	V	K	E	K	V	A	M	D	S	T	I	A	R	T	R	N	N	N	V	V	L	E	R	S	T	I	A	L	K	K	R	K	L	I	D	K	S
A/Hong_Kong/470129/2013	E	I	K	T	I	V	V	V	K	I	D	A	V	K	E	K	I	A	M	D	S	T	I	V	R	T	K	N	D	N	V	V	L	E	R	S	T	I	V	P	K	K	K	K	L	I	D	K	S
A/Huizhou/01/2013	E	V	K	T	I	V	V	V	K	I	D	A	V	K	E	K	I	A	M	D	S	T	I	A	R	T	R	N	N	N	V	V	L	E	R	S	T	I	A	L	K	K	R	R	L	I	D	K	S
A/Jiangsu/1/2013_a	K	V	K	N	M	V	M	V	K	I	D	A	I	K	E	K	V	A	M	D	S	T	I	A	R	T	R	N	N	N	V	V	L	E	R	S	T	I	A	L	K	K	R	K	L	I	D	K	S
A/Jiangsu/1/2013_b	K	V	K	N	M	V	M	V	K	I	D	A	I	K	E	K	V	A	M	D	S	T	I	A	R	T	R	N	N	N	V	V	L	E	R	S	T	I	A	L	K	K	R	R	L	I	D	K	S
A/Jiangsu/1/2013	K	V	K	N	M	V	M	V	K	I	D	A	I	K	E	K	V	A	M	D	S	T	I	A	R	T	R	N	N	N	V	V	L	E	R	S	T	I	A	L	K	K	R	R	L	I	D	K	S
A/Jiangsu/2/2013	K	V	K	N	M	V	M	V	K	I	D	A	I	K	E	K	V	A	M	D	S	T	I	A	R	T	R	N	N	N	V	V	L	E	R	S	T	I	A	L	K	K	R	R	L	I	D	K	S
A/Minhang/S01/2013	K	V	K	T	M	V	M	V	K	I	D	A	V	K	E	K	V	A	M	D	S	T	I	A	R	T	R	N	N	N	V	V	L	E	R	S	T	I	A	L	K	K	R	R	L	I	D	K	S
A/Nanjing/1/2013	K	V	K	N	M	V	M	V	K	I	D	A	I	K	E	K	V	A	M	D	S	T	I	A	R	T	R	N	N	N	V	V	L	E	R	S	T	I	A	L	K	K	R	R	L	I	D	K	S
A/Nanjing/2/2013	K	V	K	N	M	V	M	V	K	I	D	A	I	K	E	K	V	A	M	D	S	T	I	A	R	T	R	N	N	N	V	V	L	E	R	S	T	I	A	L	K	K	R	K	L	I	D	K	S
A/Nanjing/4/2013	K	V	K	N	M	V	M	V	K	I	D	A	V	K	E	K	V	A	M	D	S	T	I	A	R	T	R	N	N	N	V	V	L	E	R	S	T	I	A	L	K	K	R	R	L	I	D	K	S
A/Nanjing/6/2013	K	V	K	N	M	V	M	V	K	I	D	A	V	K	E	K	V	A	M	D	S	T	I	A	R	T	R	N	N	N	V	V	L	E	R	S	T	I	A	L	K	K	R	K	L	I	D	K	S
A/Nanjing/7/2013	K	V	K	N	M	V	M	V	K	I	D	A	V	K	E	K	V	A	M	D	S	T	I	A	R	T	R	N	N	N	V	V	L	E	R	S	T	I	A	L	K	K	R	R	L	I	D	K	S
A/Shanghai/02/2013	K	I	K	N	M	V	M	V	K	I	D	A	V	K	E	K	V	A	M	D	S	T	I	A	R	T	R	N	N	N	V	V	L	E	R	S	T	I	A	L	K	K	R	R	L	I	D	K	S
A/Shanghai/5190T/2013_a	K	V	K	N	M	V	M	V	K	I	D	A	V	K	E	K	V	A	M	D	S	T	I	A	R	T	R	N	N	N	V	V	L	E	R	S	T	I	A	L	K	K	R	K	L	I	D	K	S
A/Shanghai/5190T/2013_b	K	V	K	N	M	V	M	V	K	I	D	A	V	K	E	K	V	A	M	D	S	T	I	A	R	T	R	N	N	N	V	V	L	E	R	S	T	I	A	L	K	K	R	K	L	I	D	K	S
A/Shanghai/5190T/2013	K	V	K	N	M	V	M	V	K	I	D	A	V	K	E	K	V	A	M	D	S	T	I	A	R	T	R	N	N	N	V	V	L	E	R	S	T	I	A	L	K	K	R	K	L	I	D	K	S
A/Shanghai/CN01/2013	K	V	K	N	M	V	M	V	K	I	D	A	V	K	E	K	V	A	M	D	S	T	I	A	R	T	R	N	N	N	V	V	L	E	R	S	T	I	A	L	K	K	R	R	L	I	D	K	S
A/Shanghai/JS01/2013	E	V	K	T	I	V	M	V	K	I	D	A	V	K	E	K	V	A	M	D	S	T	I	V	K	T	R	N	N	S	V	V	L	E	R	S	T	I	V	P	K	K	K	K	L	I	D	K	S
A/Shanghai/MH01/2013	K	V	K	N	M	V	M	V	K	I	D	A	V	K	E	K	V	A	M	D	S	T	I	A	R	T	R	N	N	N	V	V	L	E	R	S	T	I	A	L	K	K	R	K	L	I	D	K	S
A/Suzhou/3/2013	K	V	K	N	M	V	M	V	K	I	D	A	V	K	E	K	V	A	M	D	S	T	I	A	R	T	R	N	N	N	V	V	L	E	R	S	T	I	A	L	K	K	R	K	L	I	D	K	S
A/Suzhou/5/2013	K	V	K	N	M	V	M	V	K	I	D	A	V	K	E	K	V	A	M	D	S	T	I	A	R	T	R	N	N	N	V	V	L	E	R	S	T	I	A	L	K	K	R	R	L	I	D	K	S
A/Taiwan/S02076/2013	K	-	-	-	-	-	-	V	K	I	D	-	-	-	-	-	-	-	-	-	S	T	I	A	-	-	-	-	-	-	-	-	-	-	-	S	T	I	A	L	K	K	R	R	L	I	D	K	S
A/Taiwan/T02081/2013	K	-	-	-	-	-	-	V	K	I	D	E	-	-	-	-	-	-	-	-	S	T	I	A	-	-	-	-	-	-	-	-	-	-	-	S	T	I	A	L	K	K	R	R	L	I	D	K	S
A/Wuxi/1/2013	K	V	K	N	M	V	M	V	K	I	D	A	V	K	E	K	V	A	M	D	S	T	I	A	R	T	R	N	N	N	V	V	L	E	R	S	T	I	A	L	K	K	R	R	L	I	D	K	S
A/Wuxi/2/2013	K	V	K	N	M	V	M	V	K	I	D	A	V	K	E	K	V	A	M	D	S	T	I	A	R	T	R	N	N	N	V	V	L	E	R	S	T	I	A	L	K	K	R	K	L	I	D	K	S
A/Wuxi/3/2013	K	V	K	N	M	V	M	V	K	I	D	A	V	K	E	K	V	A	M	D	S	T	I	A	R	T	R	N	N	N	V	V	L	E	R	S	T	I	A	L	K	K	R	K	L	I	D	K	S
A/Wuxi/4/2013	K	V	K	N	M	V	M	V	K	I	D	A	V	K	E	K	V	A	M	D	S	T	I	A	R	T	R	N	N	N	V	V	L	E	R	S	T	I	A	L	K	K	R	K	L	I	D	K	S
A/Xuzhou/1/2013	K	V	K	N	M	V	M	V	K	I	D	A	V	K	E	K	V	A	M	D	S	T	I	A	R	T	R	N	N	N	V	V	L	E	R	S	T	I	A	L	K	K	R	K	L	I	D	K	S
A/Zhejiang/DTID_ZJU01/2013	K	V	K	N	M	V	M	V	K	I	D	A	V	K	E	K	V	A	M	D	S	T	I	V	R	T	R	N	D	S	V	V	L	E	R	S	T	I	V	L	K	K	K	K	L	I	D	K	S
A/Zhejiang/DTID_ZJU10/2013	K	-	-	-	-	-	-	-	K	I	D	E	-	-	-	-	-	-	-	-	S	T	I	A	-	-	-	-	-	-	-	-	-	-	-	S	T	I	A	L	K	K	R	K	L	I	D	K	S
A/Zhenjiang/1/2013	K	V	K	N	M	V	M	V	K	I	D	A	I	K	E	K	V	A	M	D	S	T	I	A	R	T	R	N	N	N	V	V	L	E	R	S	T	I	A	L	K	K	R	K	L	I	D	K	S
A/Huai'an/062/2014	E	V	K	T	I	V	M	V	K	I	D	A	V	K	E	K	I	A	M	D	S	T	I	V	R	T	R	N	D	N	V	V	L	E	R	S	T	I	V	P	K	K	K	K	L	I	D	K	S
A/Huai'an/065/2014	E	V	K	T	I	V	M	V	K	I	D	A	V	K	E	K	I	A	M	D	S	T	I	V	R	T	R	N	D	N	V	V	L	E	R	S	T	I	V	P	K	K	K	K	L	I	D	K	S
A/Huai'an/074/2014	E	V	K	T	I	V	M	V	K	I	D	A	V	K	E	K	V	A	M	D	S	T	I	A	R	T	R	N	N	N	V	V	L	E	R	S	T	I	A	L	K	K	R	R	L	I	D	K	S
A/Huai'an/083/2014	E	V	K	T	I	V	M	V	K	I	D	A	V	K	E	K	V	A	M	D	S	T	I	V	R	T	R	N	D	N	V	V	L	E	R	S	T	I	V	P	K	K	K	K	L	I	D	K	S
A/Shanghai/01/2014	E	V	K	T	I	V	M	V	K	I	D	A	V	K	E	K	V	A	M	D	S	T	I	A	R	T	R	N	N	N	V	V	L	E	R	S	T	I	A	P	K	K	R	K	L	I	D	K	S
A/Shanghai/Mix1/2014	E	V	K	T	I	V	M	V	K	I	D	A	V	K	E	K	V	A	M	D	S	T	I	A	R	T	R	N	N	N	V	V	L	E	R	S	T	I	A	P	K	K	R	R	L	I	D	K	S
A/Shenzhen/SP_W1/2014	E	V	K	T	I	V	V	V	K	I	D	A	V	K	E	K	I	A	M	D	S	T	I	A	R	T	R	N	N	N	V	V	L	E	R	S	T	I	A	L	K	K	R	R	L	I	D	K	S
A/Shenzhen/SP_Z93/2014	E	V	K	T	I	V	V	V	K	I	D	A	V	K	E	K	I	A	M	D	S	T	I	A	R	T	R	N	N	N	V	V	L	E	R	S	T	I	A	L	K	K	R	K	L	I	D	K	S
A/Shenzhen/SP113/2014	E	V	K	T	I	V	V	V	K	I	D	A	V	K	E	K	I	A	M	D	S	T	I	I	K	T	R	N	D	N	V	V	L	G	R	S	T	I	I	P	K	K	K	K	L	I	D	K	S
A/Shenzhen/SP116/2014	E	V	K	T	I	V	V	V	K	I	D	A	V	K	E	K	I	A	M	D	S	T	I	A	R	T	R	N	N	N	V	V	L	E	R	S	T	I	A	P	K	K	R	K	L	I	D	K	S
A/Shenzhen/SP118/2014	E	V	K	T	I	V	M	V	K	I	D	A	V	K	E	K	V	A	M	D	S	T	I	V	R	T	K	N	D	N	V	V	L	E	R	S	T	I	V	P	K	K	K	K	L	I	D	K	S
A/Shenzhen/SP126/2014	E	V	K	T	M	V	M	V	K	I	D	A	V	K	E	K	I	A	M	D	S	T	I	V	R	T	K	N	D	N	V	V	L	E	R	S	T	I	V	P	K	K	K	K	L	I	D	K	S
A/Shenzhen/SP139/2014	E	V	K	T	M	V	M	V	K	I	D	A	V	K	E	K	I	A	M	D	S	T	I	V	R	T	R	N	D	S	V	V	L	E	G	S	T	I	V	L	K	K	K	K	L	I	D	K	S
A/Shenzhen/SP16/2014	E	V	K	T	I	V	V	V	K	I	D	A	V	K	E	K	I	A	M	D	S	T	I	A	R	T	R	N	N	N	V	V	L	E	R	S	T	I	A	L	K	K	R	K	L	I	D	K	S
A/Shenzhen/SP17/2014	E	V	K	T	I	V	V	V	K	I	D	A	V	K	E	K	I	A	M	D	S	T	I	A	R	T	R	N	N	N	V	V	L	E	R	S	T	I	A	L	K	K	R	K	L	I	D	K	S
A/Shenzhen/SP26/2014	E	V	K	T	I	V	V	V	K	I	D	A	V	K	E	K	I	A	M	D	S	T	I	A	R	T	R	N	N	N	V	I	L	E	R	S	T	I	A	L	K	K	R	R	L	I	D	K	S
A/Shenzhen/SP38/2014	E	V	K	T	I	V	V	V	K	I	D	A	V	K	E	K	I	A	M	D	S	T	I	A	R	T	R	N	N	N	V	V	L	E	R	S	T	I	A	L	K	K	R	R	L	I	D	K	S
A/Shenzhen/SP4/2014	-	-	-	-	-	-	-	V	K	I	D	A	V	K	E	K	I	A	M	D	S	T	I	A	R	T	R	N	N	N	V	V	L	E	R	S	T	I	A	L	K	K	R	K	L	I	D	K	-
A/Shenzhen/SP44/2014	E	I	K	T	I	V	V	V	K	I	D	A	V	K	E	K	I	A	M	D	S	T	I	V	R	T	K	N	D	N	V	V	L	E	R	S	T	I	V	P	K	K	K	K	L	I	D	K	S
A/Shenzhen/SP48/2014	E	V	K	T	I	V	V	V	K	I	D	A	V	K	E	K	I	A	M	D	S	T	I	V	R	T	K	N	D	N	V	V	L	E	R	S	T	I	V	P	K	K	K	K	L	I	D	K	S
A/Shenzhen/SP49/2014	E	V	K	T	I	V	V	V	K	I	D	A	V	K	E	K	I	A	M	D	S	T	I	A	R	T	R	N	N	N	V	V	L	E	R	S	T	I	A	L	K	K	R	K	L	I	D	K	S
A/Shenzhen/SP58/2014	E	V	K	T	I	V	V	V	K	I	D	A	V	K	E	K	I	A	M	D	S	T	I	A	R	T	R	N	N	N	V	V	L	E	R	S	T	I	A	L	K	K	R	K	L	I	D	K	S
A/Shenzhen/SP60/2014	E	V	K	T	I	V	V	V	K	I	D	A	V	K	E	K	I	A	M	D	S	T	I	V	R	T	K	N	D	N	V	V	L	E	R	S	T	I	V	P	K	K	K	K	L	I	D	K	S
A/Shenzhen/SP62/2014	E	V	K	T	I	V	V	V	K	I	D	A	V	K	E	K	I	A	M	D	S	T	I	I	K	T	R	N	D	N	V	V	L	G	R	S	T	I	I	P	K	K	K	K	L	I	D	K	S
A/Shenzhen/SP75/2014	E	V	K	T	I	V	V	V	K	I	D	A	V	K	E	K	I	A	M	D	S	T	I	V	R	T	K	N	D	N	V	V	L	E	R	S	T	I	V	P	K	K	K	K	L	I	D	K	S
A/Taiwan/4_CGMH1/2014	E	V	K	T	I	V	M	V	K	I	D	A	V	K	E	K	V	A	M	D	S	I	I	A	R	T	R	N	N	S	V	V	L	E	S	S	I	I	A	P	K	K	R	R	L	I	D	K	S
A/Taiwan/4_CGMH2/2014	E	V	K	T	I	V	M	V	K	I	D	A	V	K	E	K	V	A	M	D	S	I	I	A	R	T	R	N	N	S	V	V	L	E	S	S	I	I	A	P	K	K	R	R	L	I	D	K	S
A/Fujian/S03/2015	E	V	K	T	I	V	I	V	K	I	D	A	V	K	E	K	I	A	M	D	S	T	I	A	R	T	R	N	N	N	V	V	L	E	R	S	T	I	A	P	K	K	K	K	L	I	D	K	S
A/Huai'an/001/2015	E	V	K	T	I	V	M	V	K	I	D	A	V	K	E	K	V	A	M	D	S	T	I	A	R	T	R	N	N	N	V	V	L	E	R	S	T	I	A	L	K	K	R	K	L	I	D	K	S
A/Huai'an/002/2015	E	V	K	T	I	V	M	V	K	I	D	A	V	K	E	K	V	A	M	D	S	T	I	A	R	T	R	N	N	N	V	V	L	E	R	S	T	I	A	P	K	K	R	K	L	I	D	K	S
A/Quzhou/1/2015	E	V	K	T	I	V	M	V	K	I	D	A	V	K	E	K	V	A	M	D	S	T	I	A	R	T	R	N	N	N	V	V	L	E	R	S	T	I	A	P	K	K	R	K	L	I	D	K	S
A/Quzhou/2/2015	E	V	K	T	I	V	M	V	K	I	D	A	V	K	E	K	V	A	M	D	S	T	I	A	R	T	R	N	N	N	V	V	L	E	R	S	T	I	A	P	K	K	R	R	L	I	D	K	S
	K	V	K	N	M	V	M	V	K	I	D	A	V	K	E	K	V	A	M	D	S	T	I	A	R	T	R	N	N	N	V	V	L	E	R	S	T	I	A	L	K	K	R	R	L	I	D	K	S
111 A2H Reference		Avian index							Human index							Other variants
[truncated: 66 more columns]

## Sheet: LEGEND
Supplementary Table 7 | Heat map depicting timeline of adaptation to avian-to-human substitution (A2H) for all proteins of influenza A among publicly reported, full-length, avian and human influenza A(H7N9) virus strains. Using the 109 A2H substitution sites identified from the 2014 dataset and the two new sites from 2017 dataset as a reference, corresponding signature residues for each reported …
