# Supplementary material for: Avian Influenza H7N9 Virus Adaptation to Human Hosts
Source: Viruses. 2021 May 10;13(5):871. doi: 10.3390/v13050871 (PMC8150935; doi:10.3390/v13050871)
Supplement: Supplementary file 1 [file viruses-13-00871-s001.zip › SUPPLEMENTARY TABLE 8.xlsx]

## Sheet: Sheet4
Supplementary Table 8 | Comparison of the avian-to-human (A2H) substitution identified in the proteins of influenza A(H7N9) viruses from 2014 and 2017 datasets against the internal proteins of H9N2 chicken viruses, reported pre- and post-2013.
Proteina	Positionb	H7N9 amino acid substitutionc	H9N2, pre-2013 dataset				H9N2, post-2013 dataset
			Number of sequences	Total sequences	%	Presence of A2H	Number of sequences	Total sequences	%	Presence of A2H
PB2	187 - 195	E191K	4	497	0.804829	Yes	30	500	6	Yes
	288 - 296	#I292V	169		34.004	Yes	324		64.8	Yes
	385 - 393	#R389K	203		40.8451	Yes	409		81.8	Yes
	555 - 563	T559N	10		2.01207	Yes	5		1	Yes
	566 - 574	I570M(New)	344		69.2153	Yes	305		61	Yes
	644 - 652	#L648V	140		28.169	Yes	263		52.6	Yes
	672 - 680	#T676M	171		34.4064	Yes	259		51.8	Yes
PB1	10 - 18	#A14V	252	444	56.7568	Yes	259	406	63.7931	Yes
	44 - 52	#Q48K	125		28.1532	Yes	281		69.2118	Yes
	109 - 117	V113I	223		50.2252	Yes	367		90.3941	Yes
	168 - 176	#E172D	120		27.027	Yes	281		69.2118	Yes
	253 - 261	#T257A	141		31.7568	Yes	295		72.6601	Yes
	364 - 372	#I368V	126		28.3784	Yes	245		60.3448	Yes
	381 - 389	#E383K, #K387E	185		41.6667	Yes	320		78.8177	Yes
	423 - 431	#R430K	259		58.3333	Yes	338		83.2512	Yes
	521 - 529	I525V	0		0	No	113		27.8325	Yes
	569 - 577	#S573A	186		41.8919	Yes	324		79.803	Yes
	624 - 632	#L628M	194		43.6937	Yes	329		81.0345	Yes
	634 - 642	#E638D	192		43.2432	Yes	298		73.399	Yes
PA	33 - 41	#A37S	228	522	43.6782	Yes	385	526	73.1939	Yes
	58 - 66	#I61T, #V63I	218		41.7625	Yes	361		68.6312	Yes
	92 - 100	V100A	4		0.766284	Yes	69		13.1179	Yes
	257 - 265	#K262R	242		46.3602	Yes	229		43.5361	Yes
	333 - 341	#A337T	223		42.7203	Yes	364		69.2015	Yes
	352 - 360	#K356R	41		7.85441	Yes	289		54.943	Yes
	387 - 395	#S388N, D394N	22		4.21456	Yes	42		7.98479	Yes
	407 - 415	#S409N	284		54.4061	Yes	368		69.962	Yes
	419 - 427	#I423V	193		36.9732	Yes	375		71.2928	Yes
	550 - 558	#I554V	214		40.9962	Yes	368		69.962	Yes
	603 - 611	#M607L	240		45.977	Yes	369		70.1521	Yes
	680 - 688	#G684E	0		0	No	0		0	No
	708 - 716	K716R	0		0	No	0		0	No
PA_X	33 - 41	A37S	153	492	31.0976	Yes	186	288	64.5833	Yes
	58 - 66	I61T, V63I	161		32.7236	Yes	174		60.4167	Yes
	92 - 100	V100A	3		0.609756	Yes	32		11.1111	Yes
	192 - 200	P194L, R195K, R199K	10		2.03252	Yes	30		10.4167	Yes
	243 - 251	K248R	0		0	No	0		0	No
NP	30 - 38	G34S	216	422	51.1848	Yes	256	345	74.2029	Yes
	48 - 56	#Y52N	157		37.2038	Yes	262		75.942	Yes
	73 - 81	K77R	414		98.1043	Yes	342		99.1304	Yes
	182 - 190	#V186I	211		50	Yes	262		75.942	Yes
	348 - 356	#V352M	171		40.5213	Yes	226		65.5072	Yes
	371 - 379	T373A, S377N	113		26.7773	Yes	138		40	Yes
	402 - 410	#I406V	86		20.3791	Yes	122		35.3623	Yes
	478 - 486	S482N	0		0	No	0		0	No
M1	11 - 19	V15I	148	165	89.697	Yes	77	81	95.0617	Yes
	33 - 41	#T37A	27		16.3636	Yes	58		71.6049	Yes
	42 - 50	#L46I	79		47.8788	Yes	58		71.6049	Yes
	94 - 102	#R95K, R101K	65		39.3939	Yes	72		88.8889	Yes
	103 - 111	I107M	142		86.0606	Yes	79		97.5309	Yes
	138 - 146	#T140A, #V142G, F144L	69		41.8182	Yes	63		77.7778	Yes
	153 - 161	S157A	121		73.3333	Yes	75		92.5926	Yes
	162 - 170	V166A	111		67.2727	Yes	58		71.6049	Yes
	219 - 227	#I219V, #S224N, #A227T	36		21.8182	Yes	54		66.6667	Yes
	230 - 238	L234I	150		90.9091	Yes	73		90.1235	Yes
	241 - 249	#K242N, #M248L	41		24.8485	Yes	65		80.2469	Yes
M2	7 - 15	#N13T	18	256	7.03125	Yes	35	179	19.5531	Yes
	17 - 25	#K18N, D24E	0		0	No	2		1.11732	Yes
	25 - 33	I28V, #S31N	70		27.3438	Yes	115		64.2458	Yes
	51 - 59	L55F	221		86.3281	Yes	154		86.0335	Yes
	64 - 72	#V68M	48		18.75	Yes	124		69.2737	Yes
	78 - 86	S82N	159		62.1094	Yes	120		67.0391	Yes
	89 - 97	E97K	92		35.9375	Yes	98		54.7486	Yes
NS1	23 - 31	L27M	31	504	6.15079	Yes	110	326	33.7423	Yes
	47 - 55	#G47S, E55R	197		39.0873	Yes	221		67.7914	Yes
	56 - 64	A60E, Q63H	232		46.0317	Yes	187		57.362	Yes
	74 - 82	#L77F, #T80S	33		6.54762	Yes	97		29.7546	Yes
	83 - 91	S87P	249		49.4048	Yes	187		57.362	Yes
	100 - 108	F103L, M106I	341		67.6587	Yes	246		75.4601	Yes
	107 - 115	V111I, A112T	6		1.19048	Yes	105		32.2086	Yes
	122 - 130	M124V, I129T	148		29.3651	Yes	126		38.6503	Yes
	137 - 145	D139N, T143A	291		57.7381	Yes	188		57.6687	Yes
	168 - 176	E172K	190		37.6984	Yes	216		66.2577	Yes
	178 - 186	G179E, V180I, L185F	0		0	No	0		0	No
	203 - 211	N207D	0		0	No	0		0	No
	208 - 216	P212S, P215S, #P216T	0		0	No	0		0	No
NS2	14 - 22	#M14T, G22R	17	301	5.64784	Yes	76	165	46.0606	Yes
	45 - 53	V49A	139		46.1794	Yes	96		58.1818	Yes
a HA protein sequence numeration is based on H7N9 HA protein sequence alignment.
b Amino acid number at the start and end of a nonamer position in the protein alignment.
c H7N9 amino acid substitutions that are also reported to be in the evolutionary path to A(H7N9) viruses (Neumann et al.) are indicated by #. The A2H substitutions that have been strikethrough are those that are not retained in 2017 data of H7N9, albeit other substitution(s) at the nonamer position were retained.
