# Supplementary material for: Avian Influenza H7N9 Virus Adaptation to Human Hosts
Source: Viruses. 2021 May 10;13(5):871. doi: 10.3390/v13050871 (PMC8150935; doi:10.3390/v13050871)
Supplement: Supplementary file 1 [file viruses-13-00871-s001.zip › SUPPLEMENTARY TABLE 9.csv]

We gratefully acknowledge the authors, originating and submitting laboratories of the sequences from GISAID's EpiFlu Database, which were used as part of the research herein. The list is detailed below.
All submitters of data may be contacted directly via www.gisaid.org
Segment ID	Segment	Country	Collection date	Isolate-ID	Isolate name	Originating Lab	Submitting Lab	Authors
EPI917062	PB2	Taiwan	2017-Feb-03	EPI_ISL_248778	A/Taiwan/1/2017		Centers for Disease Control, R.O.C. (Taiwan)
EPI887969	PB2	China	2016-Dec-16	EPI_ISL_242887	A/Jiangsu/60447/2016		WHO Chinese National Influenza Center	Wang,Dayan;Zhou,Shumei;Li,Xiyan;Li,Xiaodan;Zhang,Ye;Bo,Hong;Shu,Yuelong
EPI887961	PB2	China	2016-Dec-19	EPI_ISL_242886	A/Jiangsu/60450/2016		WHO Chinese National Influenza Center	Wang,Dayan;Zhou,Shumei;Li,Xiyan;Li,Xiaodan;Zhang,Ye;Bo,Hong;Shu,Yuelong
EPI887953	PB2	China	2016-Dec-19	EPI_ISL_242885	A/Jiangsu/60451/2016		WHO Chinese National Influenza Center	Wang,Dayan;Zhou,Shumei;Li,Xiyan;Li,Xiaodan;Zhang,Ye;Bo,Hong;Shu,Yuelong
EPI887937	PB2	China	2016-Nov-25	EPI_ISL_242883	A/Jiangsu/60454/2016		WHO Chinese National Influenza Center	Wang,Dayan;Zhou,Shumei;Li,Xiyan;Li,Xiaodan;Zhang,Ye;Bo,Hong;Shu,Yuelong
EPI887929	PB2	China	2016-Dec-02	EPI_ISL_242882	A/Jiangsu/60456/2016		WHO Chinese National Influenza Center	Wang,Dayan;Zhou,Shumei;Li,Xiyan;Li,Xiaodan;Zhang,Ye;Bo,Hong;Shu,Yuelong
EPI887921	PB2	China	2016-Dec-06	EPI_ISL_242881	A/Jiangsu/60457/2016		WHO Chinese National Influenza Center	Wang,Dayan;Zhou,Shumei;Li,Xiyan;Li,Xiaodan;Zhang,Ye;Bo,Hong;Shu,Yuelong
EPI887913	PB2	China	2016-Dec-10	EPI_ISL_242880	A/Jiangsu/60458/2016		WHO Chinese National Influenza Center	Wang,Dayan;Zhou,Shumei;Li,Xiyan;Li,Xiaodan;Zhang,Ye;Bo,Hong;Shu,Yuelong
EPI887905	PB2	China	2016-Dec-12	EPI_ISL_242879	A/Jiangsu/60459/2016		WHO Chinese National Influenza Center	Wang,Dayan;Zhou,Shumei;Li,Xiyan;Li,Xiaodan;Zhang,Ye;Bo,Hong;Shu,Yuelong
EPI887897	PB2	China	2016-Dec-13	EPI_ISL_242878	A/Jiangsu/60460/2016		WHO Chinese National Influenza Center	Wang,Dayan;Zhou,Shumei;Li,Xiyan;Li,Xiaodan;Zhang,Ye;Bo,Hong;Shu,Yuelong
EPI887889	PB2	China	2016-Dec-20	EPI_ISL_242877	A/Jiangsu/60461/2016		WHO Chinese National Influenza Center	Wang,Dayan;Zhou,Shumei;Li,Xiyan;Li,Xiaodan;Zhang,Ye;Bo,Hong;Shu,Yuelong
EPI887881	PB2	China	2016-Dec-16	EPI_ISL_242876	A/Jiangsu/60462/2016		WHO Chinese National Influenza Center	Wang,Dayan;Zhou,Shumei;Li,Xiyan;Li,Xiaodan;Zhang,Ye;Bo,Hong;Shu,Yuelong
EPI887873	PB2	China	2016-Nov-15	EPI_ISL_242875	A/Jiangsu/60463/2016		WHO Chinese National Influenza Center	Wang,Dayan;Zhou,Shumei;Li,Xiyan;Li,Xiaodan;Zhang,Ye;Bo,Hong;Shu,Yuelong
EPI887865	PB2	China	2016-Dec-09	EPI_ISL_242874	A/Jiangsu/60465/2016		WHO Chinese National Influenza Center	Wang,Dayan;Zhou,Shumei;Li,Xiyan;Li,Xiaodan;Zhang,Ye;Bo,Hong;Shu,Yuelong
EPI887857	PB2	China	2016-Oct-26	EPI_ISL_242873	A/Jiangsu/60467/2016		WHO Chinese National Influenza Center	Wang,Dayan;Zhou,Shumei;Li,Xiyan;Li,Xiaodan;Zhang,Ye;Bo,Hong;Shu,Yuelong
EPI887849	PB2	China	2016-Nov-20	EPI_ISL_242872	A/Fujian/56600/2016	Fujian Provincial Center for Disease Control and Prevention	WHO Chinese National Influenza Center	Wang,Dayan;Zhou,Shumei;Li,Xiyan;Li,Xiaodan;Zhang,Ye;Bo,Hong;Shu,Yuelong
EPI887841	PB2	China	2016-Dec-09	EPI_ISL_242871	A/Guangdong/60060/2016	Guangdong Provincial Center for Disease Control and Prevention	WHO Chinese National Influenza Center	Wang,Dayan;Zhou,Shumei;Li,Xiyan;Li,Xiaodan;Zhang,Ye;Bo,Hong;Shu,Yuelong
EPI887833	PB2	China	2016-Dec-28	EPI_ISL_242870	A/Guangdong/60923/2016	Guangdong Provincial Center for Disease Control and Prevention	WHO Chinese National Influenza Center	Wang,Dayan;Zhou,Shumei;Li,Xiyan;Li,Xiaodan;Zhang,Ye;Bo,Hong;Shu,Yuelong
EPI887825	PB2	China	2016-Nov-21	EPI_ISL_242869	A/Jiangsu/60466/2016		WHO Chinese National Influenza Center	Wang,Dayan;Zhou,Shumei;Li,Xiyan;Li,Xiaodan;Zhang,Ye;Bo,Hong;Shu,Yuelong
EPI887817	PB2	China	2016-Dec-27	EPI_ISL_242868	A/Hunan/00001/2016		WHO Chinese National Influenza Center	Wang,Dayan;Zhou,Shumei;Li,Xiyan;Li,Xiaodan;Zhang,Ye;Bo,Hong;Shu,Yuelong
EPI887809	PB2	China	2017-Jan-01	EPI_ISL_242867	A/Zhejiang/3/2017	Zhejiang Provincial Center for Disease Control and Prevention	WHO Chinese National Influenza Center	Wang,Dayan;Zhou,Shumei;Li,Xiyan;Li,Xiaodan;Zhang,Ye;Bo,Hong;Shu,Yuelong
EPI887801	PB2	China	2016-Oct-07	EPI_ISL_242866	A/Zhejiang/6/2016	Zhejiang Provincial Center for Disease Control and Prevention	WHO Chinese National Influenza Center	Wang,Dayan;Zhou,Shumei;Li,Xiyan;Li,Xiaodan;Zhang,Ye;Bo,Hong;Shu,Yuelong
EPI887793	PB2	China	2016-Dec-11	EPI_ISL_242865	A/Zhejiang/8/2016	Zhejiang Provincial Center for Disease Control and Prevention	WHO Chinese National Influenza Center	Wang,Dayan;Zhou,Shumei;Li,Xiyan;Li,Xiaodan;Zhang,Ye;Bo,Hong;Shu,Yuelong
EPI887785	PB2	China	2016-Dec-12	EPI_ISL_242864	A/Zhejiang/9/2016	Zhejiang Provincial Center for Disease Control and Prevention	WHO Chinese National Influenza Center	Wang,Dayan;Zhou,Shumei;Li,Xiyan;Li,Xiaodan;Zhang,Ye;Bo,Hong;Shu,Yuelong
EPI887777	PB2	China	2016-Dec-18	EPI_ISL_242863	A/Zhejiang/10/2016	Zhejiang Provincial Center for Disease Control and Prevention	WHO Chinese National Influenza Center	Wang,Dayan;Zhou,Shumei;Li,Xiyan;Li,Xiaodan;Zhang,Ye;Bo,Hong;Shu,Yuelong
EPI887769	PB2	China	2016-Dec-21	EPI_ISL_242862	A/Zhejiang/11/2016	Zhejiang Provincial Center for Disease Control and Prevention	WHO Chinese National Influenza Center	Wang,Dayan;Zhou,Shumei;Li,Xiyan;Li,Xiaodan;Zhang,Ye;Bo,Hong;Shu,Yuelong
EPI887761	PB2	China	2016-Dec-25	EPI_ISL_242861	A/Zhejiang/12/2016	Zhejiang Provincial Center for Disease Control and Prevention	WHO Chinese National Influenza Center	Wang,Dayan;Zhou,Shumei;Li,Xiyan;Li,Xiaodan;Zhang,Ye;Bo,Hong;Shu,Yuelong
EPI887753	PB2	China	2016-Dec-24	EPI_ISL_242860	A/Zhejiang/13/2016	Zhejiang Provincial Center for Disease Control and Prevention	WHO Chinese National Influenza Center	Wang,Dayan;Zhou,Shumei;Li,Xiyan;Li,Xiaodan;Zhang,Ye;Bo,Hong;Shu,Yuelong
EPI887745	PB2	China	2016-Dec-23	EPI_ISL_242859	A/Zhejiang/14/2016	Zhejiang Provincial Center for Disease Control and Prevention	WHO Chinese National Influenza Center	Wang,Dayan;Zhou,Shumei;Li,Xiyan;Li,Xiaodan;Zhang,Ye;Bo,Hong;Shu,Yuelong
EPI887737	PB2	China	2016-Dec-21	EPI_ISL_242858	A/Zhejiang/15/2016	Zhejiang Provincial Center for Disease Control and Prevention	WHO Chinese National Influenza Center	Wang,Dayan;Zhou,Shumei;Li,Xiyan;Li,Xiaodan;Zhang,Ye;Bo,Hong;Shu,Yuelong
EPI887729	PB2	China	2016-Dec-21	EPI_ISL_242857	A/Zhejiang/16/2016	Zhejiang Provincial Center for Disease Control and Prevention	WHO Chinese National Influenza Center	Wang,Dayan;Zhou,Shumei;Li,Xiyan;Li,Xiaodan;Zhang,Ye;Bo,Hong;Shu,Yuelong
EPI887721	PB2	China	2017-Jan-07	EPI_ISL_242856	A/Zhejiang/1/2017	Zhejiang Provincial Center for Disease Control and Prevention	WHO Chinese National Influenza Center	Wang,Dayan;Zhou,Shumei;Li,Xiyan;Li,Xiaodan;Zhang,Ye;Bo,Hong;Shu,Yuelong
EPI887713	PB2	China	2017-Jan-04	EPI_ISL_242855	A/Zhejiang/2/2017	Zhejiang Provincial Center for Disease Control and Prevention	WHO Chinese National Influenza Center	Wang,Dayan;Zhou,Shumei;Li,Xiyan;Li,Xiaodan;Zhang,Ye;Bo,Hong;Shu,Yuelong
EPI887705	PB2	China	2016-Dec-05	EPI_ISL_242854	A/Zhejiang/7/2016	Zhejiang Provincial Center for Disease Control and Prevention	WHO Chinese National Influenza Center	Wang,Dayan;Zhou,Shumei;Li,Xiyan;Li,Xiaodan;Zhang,Ye;Bo,Hong;Shu,Yuelong
EPI887697	PB2	China	2016-Dec-31	EPI_ISL_242853	A/Zhejiang/17/2016	Zhejiang Provincial Center for Disease Control and Prevention	WHO Chinese National Influenza Center	Wang,Dayan;Zhou,Shumei;Li,Xiyan;Li,Xiaodan;Zhang,Ye;Bo,Hong;Shu,Yuelong
EPI887689	PB2	China	2016-Dec-27	EPI_ISL_242852	A/Zhejiang/18/2016	Zhejiang Provincial Center for Disease Control and Prevention	WHO Chinese National Influenza Center	Wang,Dayan;Zhou,Shumei;Li,Xiyan;Li,Xiaodan;Zhang,Ye;Bo,Hong;Shu,Yuelong
EPI887681	PB2	China	2017-Jan-05	EPI_ISL_242851	A/Zhejiang/4/2017	Zhejiang Provincial Center for Disease Control and Prevention	WHO Chinese National Influenza Center	Wang,Dayan;Zhou,Shumei;Li,Xiyan;Li,Xiaodan;Zhang,Ye;Bo,Hong;Shu,Yuelong
EPI887673	PB2	China	2016-Dec-28	EPI_ISL_242850	A/Zhejiang/19/2016	Zhejiang Provincial Center for Disease Control and Prevention	WHO Chinese National Influenza Center	Wang,Dayan;Zhou,Shumei;Li,Xiyan;Li,Xiaodan;Zhang,Ye;Bo,Hong;Shu,Yuelong
EPI887665	PB2	China	2016-Dec-30	EPI_ISL_242849	A/Zhejiang/20/2016	Zhejiang Provincial Center for Disease Control and Prevention	WHO Chinese National Influenza Center	Wang,Dayan;Zhou,Shumei;Li,Xiyan;Li,Xiaodan;Zhang,Ye;Bo,Hong;Shu,Yuelong
EPI887657	PB2	China	2017-Jan-02	EPI_ISL_242848	A/Zhejiang/5/2017	Zhejiang Provincial Center for Disease Control and Prevention	WHO Chinese National Influenza Center	Wang,Dayan;Zhou,Shumei;Li,Xiyan;Li,Xiaodan;Zhang,Ye;Bo,Hong;Shu,Yuelong
EPI887649	PB2	China	2017-Jan-05	EPI_ISL_242847	A/Zhejiang/6/2017	Zhejiang Provincial Center for Disease Control and Prevention	WHO Chinese National Influenza Center	Wang,Dayan;Zhou,Shumei;Li,Xiyan;Li,Xiaodan;Zhang,Ye;Bo,Hong;Shu,Yuelong
EPI887641	PB2	China	2017-Jan-08	EPI_ISL_242846	A/Hunan/02285/2017		WHO Chinese National Influenza Center	Wang,Dayan;Zhou,Shumei;Li,Xiyan;Li,Xiaodan;Zhang,Ye;Bo,Hong;Shu,Yuelong
EPI887633	PB2	China	2017-Jan-11	EPI_ISL_242845	A/Hunan/02287/2017		WHO Chinese National Influenza Center	Wang,Dayan;Zhou,Shumei;Li,Xiyan;Li,Xiaodan;Zhang,Ye;Bo,Hong;Shu,Yuelong
EPI887625	PB2	China	2017-Jan-06	EPI_ISL_242844	A/Hunan/02286/2017		WHO Chinese National Influenza Center	Wang,Dayan;Zhou,Shumei;Li,Xiyan;Li,Xiaodan;Zhang,Ye;Bo,Hong;Shu,Yuelong
EPI887617	PB2	China	2017-Jan-06	EPI_ISL_242843	A/Fujian/02152/2017	Fujian Provincial Center for Disease Control and Prevention	WHO Chinese National Influenza Center	Wang,Dayan;Zhou,Shumei;Li,Xiyan;Li,Xiaodan;Zhang,Ye;Bo,Hong;Shu,Yuelong
EPI887609	PB2	China	2017-Jan-01	EPI_ISL_242842	A/Fujian/02151/2017	Fujian Provincial Center for Disease Control and Prevention	WHO Chinese National Influenza Center	Wang,Dayan;Zhou,Shumei;Li,Xiyan;Li,Xiaodan;Zhang,Ye;Bo,Hong;Shu,Yuelong
EPI884219	PB2	Hong Kong (SAR)	2017-Jan-09	EPI_ISL_242275	A/Hong Kong/214/2017	Hong Kong Department of Health	Hong Kong Department of Health	Mak,G.C.; Lo,J.Y.C.
EPI874335	PB2	Hong Kong (SAR)	2017-Jan-05	EPI_ISL_240829	A/Hong Kong/VB17002884/2017	Hong Kong Department of Health	Hong Kong Department of Health	Mak,G.C.; Lo,J.Y.C.
EPI872955	PB2	Hong Kong (SAR)	2016-Dec-28	EPI_ISL_240520	A/Hong Kong/VB16189623/2016	Hong Kong Department of Health	Hong Kong Department of Health	Mak,G.C.; Lo,J.Y.C.
EPI869670	PB2	Hong Kong (SAR)	2016-Dec-19	EPI_ISL_239994	A/Hong Kong/VB16184091/2016	Hong Kong Department of Health	Hong Kong Department of Health	Mak,G.C.; Lo,J.Y.C.
EPI833710	PB2	China	2016-Jan-15	EPI_ISL_233629	A/Fujian/3/2016	Fujian Provincial Center for Disease Control and Prevention	Fujian Center for Disease Control and Prevention
EPI833701	PB2	China	2016-Jan-13	EPI_ISL_233628	A/Fujian/1/2016	Fujian Provincial Center for Disease Control and Prevention	Fujian Center for Disease Control and Prevention
EPI769636	PB2	China	2015-Jan-17	EPI_ISL_223680	A/Fujian/22/2015		Fujian Center for Disease Control and Prevention
EPI769580	PB2	China	2015-Jan-15	EPI_ISL_223673	A/Fujian/18/2015		Fujian Center for Disease Control and Prevention
EPI769572	PB2		2015-Jan-15	EPI_ISL_223672	A/Fujian/16/2015		Fujian Center for Disease Control and Prevention
EPI769562	PB2		2015-Jan-14	EPI_ISL_223670	A/Fujian/10/2015	Fujian Provincial Center for Disease Control and Prevention	Fujian Center for Disease Control and Prevention
EPI769563	PB2		2015-Jan-14	EPI_ISL_223670	A/Fujian/10/2015	Fujian Provincial Center for Disease Control and Prevention	Fujian Center for Disease Control and Prevention
EPI740735	PB2	Hong Kong (SAR)	2016-Apr-19	EPI_ISL_217947	A/Hong Kong/VB16064646/2016	Hong Kong Department of Health	Hong Kong Department of Health	Mak,G.C.; Lo,J.Y.C.
EPI730492	PB2	Hong Kong (SAR)	2016-Mar-24	EPI_ISL_215688	A/Hong Kong/VB16049808/2016	Hong Kong Department of Health	Hong Kong Department of Health	Mak,G.C.; Lo,J.Y.C.
EPI729456	PB2	Taiwan	2014-Apr-24	EPI_ISL_215534	A/Taiwan/4-CGMH2/2014		Import from public-domain	Chen,G.W.; Kuo,S.M.; Yang,S.L.; Gong,Y.N.; Hsiao,M.R.; Liu,Y.C.; Shih,S.R.; Tsao,K.C.; Tsao,K.-C.; Shih,S.-R.; Chen,G.-W.; Yang,S.-L.; Hsiao,M.-J.; Kuo,S.-M.; Liu,Y.-C.
EPI729448	PB2	Taiwan	2014-Apr-24	EPI_ISL_215533	A/Taiwan/4-CGMH1/2014		Import from public-domain	Chen,G.W.; Kuo,S.M.; Yang,S.L.; Gong,Y.N.; Hsiao,M.R.; Liu,Y.C.; Shih,S.R.; Tsao,K.C.; Tsao,K.-C.; Shih,S.-R.; Chen,G.-W.; Yang,S.-L.; Hsiao,M.-J.; Kuo,S.-M.; Liu,Y.-C.
EPI656503	PB2	China	2015-Mar-10	EPI_ISL_198750	A/GD-120/2015/H7N9/2015-03-10	Guangdong Provincial Center for Disease Control and Prevention	Guangdong Provincial Center for Disease Control and Prevention
EPI656495	PB2	China	2015-Mar-05	EPI_ISL_198749	A/GD-95/2015/H7N9/2015-03-05	Guangdong Provincial Center for Disease Control and Prevention	Guangdong Provincial Center for Disease Control and Prevention
EPI656487	PB2	China	2015-Feb-26	EPI_ISL_198748	A/GD-124/2015/H7N9/2015-02-26	Guangdong Provincial Center for Disease Control and Prevention	Guangdong Provincial Center for Disease Control and Prevention
EPI656479	PB2	China	2015-Feb-26	EPI_ISL_198747	A/GD-91/2015/H7N9/2015-02-26	Guangdong Provincial Center for Disease Control and Prevention	Guangdong Provincial Center for Disease Control and Prevention
EPI656471	PB2	China	2015-Feb-26	EPI_ISL_198746	A/GD-92/2015/H7N9/2015-02-26	Guangdong Provincial Center for Disease Control and Prevention	Guangdong Provincial Center for Disease Control and Prevention
EPI656463	PB2	China	2015-Feb-10	EPI_ISL_198745	A/GD-76/2015/H7N9/2015-02-10	Guangdong Provincial Center for Disease Control and Prevention	Guangdong Provincial Center for Disease Control and Prevention
EPI656455	PB2	China	2015-Feb-10	EPI_ISL_198744	A/GD-81/2015/H7N9/2015-02-10	Guangdong Provincial Center for Disease Control and Prevention	Guangdong Provincial Center for Disease Control and Prevention
EPI656447	PB2	China	2015-Feb-10	EPI_ISL_198743	A/GD-80/2015/H7N9/2015-02-10	Guangdong Provincial Center for Disease Control and Prevention	Guangdong Provincial Center for Disease Control and Prevention
EPI656439	PB2	China	2015-Feb-08	EPI_ISL_198742	A/GD-68/2015/H7N9/2015-02-08	Guangdong Provincial Center for Disease Control and Prevention	Guangdong Provincial Center for Disease Control and Prevention
EPI656431	PB2	China	2015-Feb-07	EPI_ISL_198741	A/GD-72/2015/H7N9/2015-02-07	Guangdong Provincial Center for Disease Control and Prevention	Guangdong Provincial Center for Disease Control and Prevention
EPI656423	PB2	China	2015-Feb-04	EPI_ISL_198740	A/GD-69/2015/H7N9/2015-02-04	Guangdong Provincial Center for Disease Control and Prevention	Guangdong Provincial Center for Disease Control and Prevention
EPI656415	PB2	China	2015-Feb-03	EPI_ISL_198739	A/GD-57/2015/H7N9/2015-02-03	Guangdong Provincial Center for Disease Control and Prevention	Guangdong Provincial Center for Disease Control and Prevention
EPI656407	PB2	China	2015-Feb-03	EPI_ISL_198738	A/GD-53/2015/H7N9/2015-02-03	Guangdong Provincial Center for Disease Control and Prevention	Guangdong Provincial Center for Disease Control and Prevention
EPI656399	PB2	China	2015-Jan-30	EPI_ISL_198737	A/GD-51/2015/H7N9/2015-01-30	Guangdong Provincial Center for Disease Control and Prevention	Guangdong Provincial Center for Disease Control and Prevention
EPI656391	PB2	China	2015-Jan-27	EPI_ISL_198736	A/GD-50/2015/H7N9/2015-01-27	Guangdong Provincial Center for Disease Control and Prevention	Guangdong Provincial Center for Disease Control and Prevention
EPI656383	PB2	China	2015-Jan-27	EPI_ISL_198735	A/GD-55/2015/H7N9/2015-01-27	Guangdong Provincial Center for Disease Control and Prevention	Guangdong Provincial Center for Disease Control and Prevention
EPI656375	PB2	China	2015-Jan-27	EPI_ISL_198734	A/GD-54/2015/H7N9/2015-01-27	Guangdong Provincial Center for Disease Control and Prevention	Guangdong Provincial Center for Disease Control and Prevention
EPI656367	PB2	China	2015-Jan-26	EPI_ISL_198733	A/GD-45/2015/H7N9/2015-01-26	Guangdong Provincial Center for Disease Control and Prevention	Guangdong Provincial Center for Disease Control and Prevention
EPI656359	PB2	China	2015-Jan-25	EPI_ISL_198732	A/GD-42/2015/H7N9/2015-01-25	Guangdong Provincial Center for Disease Control and Prevention	Guangdong Provincial Center for Disease Control and Prevention
EPI656351	PB2	China	2015-Jan-22	EPI_ISL_198731	A/GD-30/2015/H7N9/2015-01-22	Guangdong Provincial Center for Disease Control and Prevention	Guangdong Provincial Center for Disease Control and Prevention
EPI656343	PB2	China	2015-Jan-22	EPI_ISL_198730	A/GD-43/2015/H7N9/2015-01-22	Guangdong Provincial Center for Disease Control and Prevention	Guangdong Provincial Center for Disease Control and Prevention
EPI656335	PB2	China	2015-Jan-21	EPI_ISL_198729	A/GD-27/2015/H7N9/2015-01-21	Guangdong Provincial Center for Disease Control and Prevention	Guangdong Provincial Center for Disease Control and Prevention
EPI656327	PB2	China	2015-Jan-19	EPI_ISL_198728	A/GD-44/2015/H7N9/2015-01-19	Guangdong Provincial Center for Disease Control and Prevention	Guangdong Provincial Center for Disease Control and Prevention
EPI656319	PB2	China	2015-Jan-16	EPI_ISL_198727	A/GD-21/2015/H7N9/2015-01-16	Guangdong Provincial Center for Disease Control and Prevention	Guangdong Provincial Center for Disease Control and Prevention
EPI656311	PB2	China	2015-Jan-15	EPI_ISL_198726	A/GD-20/2015/H7N9/2015-01-15	Guangdong Provincial Center for Disease Control and Prevention	Guangdong Provincial Center for Disease Control and Prevention
EPI656303	PB2	China	2015-Jan-11	EPI_ISL_198725	A/GD-17/2015/H7N9/2015-01-11	Guangdong Provincial Center for Disease Control and Prevention	Guangdong Provincial Center for Disease Control and Prevention
EPI656295	PB2	China	2015-Jan-11	EPI_ISL_198724	A/GD-18/2015/H7N9/2015-01-11	Guangdong Provincial Center for Disease Control and Prevention	Guangdong Provincial Center for Disease Control and Prevention
EPI656287	PB2	China	2015-Jan-06	EPI_ISL_198723	A/GD-10/2015/H7N9/2015-01-06	Guangdong Provincial Center for Disease Control and Prevention	Guangdong Provincial Center for Disease Control and Prevention
EPI656279	PB2	China	2015-Jan-06	EPI_ISL_198722	A/GD-2/2015/H7N9/2015-01-06	Guangdong Provincial Center for Disease Control and Prevention	Guangdong Provincial Center for Disease Control and Prevention
EPI656271	PB2	China	2015-Jan-03	EPI_ISL_198721	A/GD-1/2015/H7N9/2015-01-03	Guangdong Provincial Center for Disease Control and Prevention	Guangdong Provincial Center for Disease Control and Prevention
EPI656263	PB2	China	2014-Nov-25	EPI_ISL_198720	A/GD-156/2014/H7N9/2014-11-25	Guangdong Provincial Center for Disease Control and Prevention	Guangdong Provincial Center for Disease Control and Prevention
EPI656255	PB2	China	2014-Nov-19	EPI_ISL_198719	A/GD-155/2014/H7N9/2014-11-19	Guangdong Provincial Center for Disease Control and Prevention	Guangdong Provincial Center for Disease Control and Prevention
EPI656247	PB2	China	2014-May-28	EPI_ISL_198718	A/GD-154/2014/H7N9/2014-05-28	Guangdong Provincial Center for Disease Control and Prevention	Guangdong Provincial Center for Disease Control and Prevention
EPI656239	PB2	China	2014-May-08	EPI_ISL_198717	A/GD-153/2014/H7N9/2014-05-08	Guangdong Provincial Center for Disease Control and Prevention	Guangdong Provincial Center for Disease Control and Prevention
EPI656231	PB2	China	2014-May-06	EPI_ISL_198716	A/GD-151/2014/H7N9/2014-05-06	Guangdong Provincial Center for Disease Control and Prevention	Guangdong Provincial Center for Disease Control and Prevention
EPI656223	PB2	China	2014-Apr-06	EPI_ISL_198715	A/GD-139/2014/H7N9/2014-04-06	Guangdong Provincial Center for Disease Control and Prevention	Guangdong Provincial Center for Disease Control and Prevention
EPI656216	PB2	China	2014-Apr-05	EPI_ISL_198714	A/GD-138/2014/H7N9/2014-04-05	Guangdong Provincial Center for Disease Control and Prevention	Guangdong Provincial Center for Disease Control and Prevention
EPI656208	PB2	China	2014-Mar-29	EPI_ISL_198713	A/GD-136/2014/H7N9/2014-03-29	Guangdong Provincial Center for Disease Control and Prevention	Guangdong Provincial Center for Disease Control and Prevention
EPI656200	PB2	China	2014-Mar-10	EPI_ISL_198712	A/GD-126/2014/H7N9/2014-03-10	Guangdong Provincial Center for Disease Control and Prevention	Guangdong Provincial Center for Disease Control and Prevention
EPI656192	PB2	China	2014-Mar-09	EPI_ISL_198711	A/GD-125/2014/H7N9/2014-03-09	Guangdong Provincial Center for Disease Control and Prevention	Guangdong Provincial Center for Disease Control and Prevention
EPI656184	PB2	China	2014-Mar-06	EPI_ISL_198710	A/GD-124/2014/H7N9/2014-03-06	Guangdong Provincial Center for Disease Control and Prevention	Guangdong Provincial Center for Disease Control and Prevention
EPI656176	PB2	China	2014-Mar-01	EPI_ISL_198709	A/GD-123/2014/H7N9/2014-03-01	Guangdong Provincial Center for Disease Control and Prevention	Guangdong Provincial Center for Disease Control and Prevention
EPI656168	PB2	China	2014-Feb-22	EPI_ISL_198708	A/GD-117/2014/H7N9/2014-02-22	Guangdong Provincial Center for Disease Control and Prevention	Guangdong Provincial Center for Disease Control and Prevention
EPI656161	PB2	China	2014-Feb-22	EPI_ISL_198707	A/GD-116/2014/H7N9/2014-02-22	Guangdong Provincial Center for Disease Control and Prevention	Guangdong Provincial Center for Disease Control and Prevention
EPI656153	PB2	China	2014-Feb-19	EPI_ISL_198706	A/GD-121/2014/H7N9/2014-02-19	Guangdong Provincial Center for Disease Control and Prevention	Guangdong Provincial Center for Disease Control and Prevention
EPI656145	PB2	China	2014-Feb-19	EPI_ISL_198705	A/GD-120/2014/H7N9/2014-02-19	Guangdong Provincial Center for Disease Control and Prevention	Guangdong Provincial Center for Disease Control and Prevention
EPI656137	PB2	China	2014-Feb-19	EPI_ISL_198704	A/GD-119/2014/H7N9/2014-02-19	Guangdong Provincial Center for Disease Control and Prevention	Guangdong Provincial Center for Disease Control and Prevention
EPI656129	PB2	China	2014-Feb-18	EPI_ISL_198703	A/GD-114/2014/H7N9/2014-02-18	Guangdong Provincial Center for Disease Control and Prevention	Guangdong Provincial Center for Disease Control and Prevention
EPI656121	PB2	China	2014-Feb-18	EPI_ISL_198702	A/GD-112/2014/H7N9/2014-02-18	Guangdong Provincial Center for Disease Control and Prevention	Guangdong Provincial Center for Disease Control and Prevention
EPI656113	PB2	China	2014-Feb-13	EPI_ISL_198701	A/GD-110/2014/H7N9/2014-02-13	Guangdong Provincial Center for Disease Control and Prevention	Guangdong Provincial Center for Disease Control and Prevention
EPI656107	PB2	China	2014-Feb-13	EPI_ISL_198700	A/GD-109/2014/H7N9/2014-02-13	Guangdong Provincial Center for Disease Control and Prevention	Guangdong Provincial Center for Disease Control and Prevention
EPI656099	PB2	China	2014-Feb-11	EPI_ISL_198699	A/GD-105/2014/H7N9/2014-02-11	Guangdong Provincial Center for Disease Control and Prevention	Guangdong Provincial Center for Disease Control and Prevention
EPI656091	PB2	China	2014-Feb-11	EPI_ISL_198698	A/GD-104/2014/H7N9/2014-02-11	Guangdong Provincial Center for Disease Control and Prevention	Guangdong Provincial Center for Disease Control and Prevention
EPI656083	PB2	China	2014-Feb-10	EPI_ISL_198697	A/GD-103/2014/H7N9/2014-02-10	Guangdong Provincial Center for Disease Control and Prevention	Guangdong Provincial Center for Disease Control and Prevention
EPI656075	PB2	China	2014-Feb-07	EPI_ISL_198696	A/GD-101/2014/H7N9/2014-02-07	Guangdong Provincial Center for Disease Control and Prevention	Guangdong Provincial Center for Disease Control and Prevention
EPI656067	PB2	China	2014-Feb-06	EPI_ISL_198695	A/GD-98/2014/H7N9/2014-02-06	Guangdong Provincial Center for Disease Control and Prevention	Guangdong Provincial Center for Disease Control and Prevention
EPI656059	PB2	China	2014-Feb-02	EPI_ISL_198694	A/GD-82/2014/H7N9/2014-02-02	Guangdong Provincial Center for Disease Control and Prevention	Guangdong Provincial Center for Disease Control and Prevention
EPI656051	PB2	China	2014-Jan-31	EPI_ISL_198693	A/GD-74/2014/H7N9/2014-01-31	Guangdong Provincial Center for Disease Control and Prevention	Guangdong Provincial Center for Disease Control and Prevention
EPI656043	PB2	China	2014-Jan-31	EPI_ISL_198692	A/GD-75/2014/H7N9/2014-01-31	Guangdong Provincial Center for Disease Control and Prevention	Guangdong Provincial Center for Disease Control and Prevention
EPI656035	PB2	China	2014-Jan-30	EPI_ISL_198691	A/GD-71/2014/H7N9/2014-01-30	Guangdong Provincial Center for Disease Control and Prevention	Guangdong Provincial Center for Disease Control and Prevention
EPI656027	PB2	China	2014-Jan-30	EPI_ISL_198690	A/GD-81/2014/H7N9/2014-01-30	Guangdong Provincial Center for Disease Control and Prevention	Guangdong Provincial Center for Disease Control and Prevention
EPI656019	PB2	China	2014-Jan-30	EPI_ISL_198689	A/GD-69/2014/H7N9/2014-01-30	Guangdong Provincial Center for Disease Control and Prevention	Guangdong Provincial Center for Disease Control and Prevention
EPI656011	PB2	China	2014-Jan-29	EPI_ISL_198688	A/GD-66/2014/H7N9/2014-01-29	Guangdong Provincial Center for Disease Control and Prevention	Guangdong Provincial Center for Disease Control and Prevention
EPI656003	PB2	China	2014-Jan-29	EPI_ISL_198687	A/GD-65/2014/H7N9/2014-01-29	Guangdong Provincial Center for Disease Control and Prevention	Guangdong Provincial Center for Disease Control and Prevention
EPI655995	PB2	China	2014-Jan-27	EPI_ISL_198686	A/GD-62/2014/H7N9/2014-01-27	Guangdong Provincial Center for Disease Control and Prevention	Guangdong Provincial Center for Disease Control and Prevention
EPI655987	PB2	China	2014-Jan-19	EPI_ISL_198685	A/GD-48/2014/H7N9/2014-01-19	Guangdong Provincial Center for Disease Control and Prevention	Guangdong Provincial Center for Disease Control and Prevention
EPI655979	PB2	China	2014-Jan-16	EPI_ISL_198684	A/GD-46/2014/H7N9/2014-01-16	Guangdong Provincial Center for Disease Control and Prevention	Guangdong Provincial Center for Disease Control and Prevention
EPI655971	PB2	China	2014-Jan-15	EPI_ISL_198683	A/GD-43/2014/H7N9/2014-01-15	Guangdong Provincial Center for Disease Control and Prevention	Guangdong Provincial Center for Disease Control and Prevention
EPI655963	PB2	China	2014-Jan-12	EPI_ISL_198682	A/GD-35/2014/H7N9/2014-01-12	Guangdong Provincial Center for Disease Control and Prevention	Guangdong Provincial Center for Disease Control and Prevention
EPI655955	PB2	China	2014-Jan-12	EPI_ISL_198681	A/GD-36/2014/H7N9/2014-01-12	Guangdong Provincial Center for Disease Control and Prevention	Guangdong Provincial Center for Disease Control and Prevention
EPI655947	PB2	China	2014-Jan-12	EPI_ISL_198680	A/GD-34/2014/H7N9/2014-01-12	Guangdong Provincial Center for Disease Control and Prevention	Guangdong Provincial Center for Disease Control and Prevention
EPI655939	PB2	China	2014-Jan-12	EPI_ISL_198679	A/GD-33/2014/H7N9/2014-01-12	Guangdong Provincial Center for Disease Control and Prevention	Guangdong Provincial Center for Disease Control and Prevention
EPI655931	PB2	China	2014-Jan-11	EPI_ISL_198678	A/GD-31/2014/H7N9/2014-01-11	Guangdong Provincial Center for Disease Control and Prevention	Guangdong Provincial Center for Disease Control and Prevention
EPI655923	PB2	China	2014-Jan-11	EPI_ISL_198677	A/GD-29/2014/H7N9/2014-01-11	Guangdong Provincial Center for Disease Control and Prevention	Guangdong Provincial Center for Disease Control and Prevention
EPI655915	PB2	China	2014-Jan-10	EPI_ISL_198676	A/GD-26/2014/H7N9/2014-01-10	Guangdong Provincial Center for Disease Control and Prevention	Guangdong Provincial Center for Disease Control and Prevention
EPI655907	PB2	China	2014-Jan-10	EPI_ISL_198675	A/GD-24/2014/H7N9/2014-01-10	Guangdong Provincial Center for Disease Control and Prevention	Guangdong Provincial Center for Disease Control and Prevention
EPI655899	PB2	China	2014-Jan-07	EPI_ISL_198674	A/GD-19/2014/H7N9/2014-01-07	Guangdong Provincial Center for Disease Control and Prevention	Guangdong Provincial Center for Disease Control and Prevention
EPI655891	PB2	China	2014-Jan-07	EPI_ISL_198673	A/GD-18/2014/H7N9/2014-01-07	Guangdong Provincial Center for Disease Control and Prevention	Guangdong Provincial Center for Disease Control and Prevention
EPI655883	PB2	China	2014-Jan-03	EPI_ISL_198672	A/GD-13/2014/H7N9/2014-01-03	Guangdong Provincial Center for Disease Control and Prevention	Guangdong Provincial Center for Disease Control and Prevention
EPI655875	PB2	China	2014-Jan-03	EPI_ISL_198671	A/GD-12/2014/H7N9/2014-01-03	Guangdong Provincial Center for Disease Control and Prevention	Guangdong Provincial Center for Disease Control and Prevention
EPI655867	PB2	China	2014-Jan-03	EPI_ISL_198670	A/GD-10/2014/H7N9/2014-01-03	Guangdong Provincial Center for Disease Control and Prevention	Guangdong Provincial Center for Disease Control and Prevention
EPI621133	PB2	China	2015-Apr-23	EPI_ISL_190692	A/Quzhou/2/2015		Import from public-domain	Cao,W.-C.; Fang,C.-F.; Ma,M.-J.; Zhan,B.-D.; Lai,S.-M.; Hu,Y.; Yang,X.-X.; Li,J.; Cao,G.-P.; Zhou,J.-J.; Zhang,J.-M.; Wang,S.-Q.; Hu,X.-L.; Chen,E.-F.; Li,Y.-J.; Yao,H.-W.; Li,X.-L.; Jiang,J.-F.; Yi,H.-M.; Xu,W.-D.; Gray,G.C.; Fang,L.-Q.
EPI621126	PB2	China	2015-Apr-25	EPI_ISL_190691	A/Quzhou/1/2015		Import from public-domain	Cao,W.-C.; Fang,C.-F.; Ma,M.-J.; Zhan,B.-D.; Lai,S.-M.; Hu,Y.; Yang,X.-X.; Li,J.; Cao,G.-P.; Zhou,J.-J.; Zhang,J.-M.; Wang,S.-Q.; Hu,X.-L.; Chen,E.-F.; Li,Y.-J.; Yao,H.-W.; Li,X.-L.; Jiang,J.-F.; Yi,H.-M.; Xu,W.-D.; Gray,G.C.; Fang,L.-Q.
EPI613796	PB2	China	2013-Jan-01	EPI_ISL_188979	A/Anhui/DEWH72-09/2013		Import from public-domain	Wentworth,D.E.; Halpin,R.A.; Lin,X.; Bera,J.; Akopov,A.; Ransier,A.; Mohan,M.; Fedorova,N.; Tsitrin,T.; Puri,V.; Stockwell,T.; Amedeo,P.; Appalla,L.; Bishop,B.; Edworthy,P.; Gupta,N.; Hoover,J.; Katzel,D.; Schobel,S.; Shrivastava,S.; Thovarai,V.; Wang,S.; Bao,Y.; Sanders,R.; Zhdanov,S.; Kiryutin,B.; Lipman,D.J.; Tatusova,T.; Fouchier,R.A.M.
EPI613789	PB2	China	2013-Jan-01	EPI_ISL_188978	A/Anhui/DEWH72-08/2013		Import from public-domain	Wentworth,D.E.; Halpin,R.A.; Lin,X.; Bera,J.; Akopov,A.; Ransier,A.; Mohan,M.; Fedorova,N.; Tsitrin,T.; Puri,V.; Stockwell,T.; Amedeo,P.; Appalla,L.; Bishop,B.; Edworthy,P.; Gupta,N.; Hoover,J.; Katzel,D.; Schobel,S.; Shrivastava,S.; Thovarai,V.; Wang,S.; Bao,Y.; Sanders,R.; Zhdanov,S.; Kiryutin,B.; Lipman,D.J.; Tatusova,T.; Fouchier,R.A.M.
EPI613782	PB2	China	2013-Jan-01	EPI_ISL_188977	A/Anhui/DEWH72-07/2013		Import from public-domain	Wentworth,D.E.; Halpin,R.A.; Lin,X.; Bera,J.; Akopov,A.; Ransier,A.; Mohan,M.; Fedorova,N.; Tsitrin,T.; Puri,V.; Stockwell,T.; Amedeo,P.; Appalla,L.; Bishop,B.; Edworthy,P.; Gupta,N.; Hoover,J.; Katzel,D.; Schobel,S.; Shrivastava,S.; Thovarai,V.; Wang,S.; Bao,Y.; Sanders,R.; Zhdanov,S.; Kiryutin,B.; Lipman,D.J.; Tatusova,T.; Fouchier,R.A.M.
EPI613775	PB2	China	2013-Jan-01	EPI_ISL_188976	A/Anhui/DEWH72-06/2013		Import from public-domain	Wentworth,D.E.; Halpin,R.A.; Lin,X.; Bera,J.; Akopov,A.; Ransier,A.; Mohan,M.; Fedorova,N.; Tsitrin,T.; Puri,V.; Stockwell,T.; Amedeo,P.; Appalla,L.; Bishop,B.; Edworthy,P.; Gupta,N.; Hoover,J.; Katzel,D.; Schobel,S.; Shrivastava,S.; Thovarai,V.; Wang,S.; Bao,Y.; Sanders,R.; Zhdanov,S.; Kiryutin,B.; Lipman,D.J.; Tatusova,T.; Fouchier,R.A.M.
EPI613768	PB2	China	2013-Jan-01	EPI_ISL_188975	A/Anhui/DEWH72-05/2013		Import from public-domain	Wentworth,D.E.; Halpin,R.A.; Lin,X.; Bera,J.; Akopov,A.; Ransier,A.; Mohan,M.; Fedorova,N.; Tsitrin,T.; Puri,V.; Stockwell,T.; Amedeo,P.; Appalla,L.; Bishop,B.; Edworthy,P.; Gupta,N.; Hoover,J.; Katzel,D.; Schobel,S.; Shrivastava,S.; Thovarai,V.; Wang,S.; Bao,Y.; Sanders,R.; Zhdanov,S.; Kiryutin,B.; Lipman,D.J.; Tatusova,T.; Fouchier,R.A.M.
EPI613834	PB2	China	2013-Jan-01	EPI_ISL_188974	A/Anhui/DEWH72-04/2013		Import from public-domain	Wentworth,D.E.; Halpin,R.A.; Lin,X.; Bera,J.; Akopov,A.; Ransier,A.; Mohan,M.; Fedorova,N.; Tsitrin,T.; Puri,V.; Stockwell,T.; Amedeo,P.; Appalla,L.; Bishop,B.; Edworthy,P.; Gupta,N.; Hoover,J.; Katzel,D.; Schobel,S.; Shrivastava,S.; Thovarai,V.; Wang,S.; Bao,Y.; Sanders,R.; Zhdanov,S.; Kiryutin,B.; Lipman,D.J.; Tatusova,T.; Fouchier,R.A.M.
EPI613827	PB2	China	2013-Jan-01	EPI_ISL_188973	A/Anhui/DEWH72-03/2013		Import from public-domain	Wentworth,D.E.; Halpin,R.A.; Lin,X.; Bera,J.; Akopov,A.; Ransier,A.; Mohan,M.; Fedorova,N.; Tsitrin,T.; Puri,V.; Stockwell,T.; Amedeo,P.; Appalla,L.; Bishop,B.; Edworthy,P.; Gupta,N.; Hoover,J.; Katzel,D.; Schobel,S.; Shrivastava,S.; Thovarai,V.; Wang,S.; Bao,Y.; Sanders,R.; Zhdanov,S.; Kiryutin,B.; Lipman,D.J.; Tatusova,T.; Fouchier,R.A.M.
EPI613820	PB2	China	2013-Jan-01	EPI_ISL_188972	A/Anhui/DEWH72-02/2013		Import from public-domain	Wentworth,D.E.; Halpin,R.A.; Lin,X.; Bera,J.; Akopov,A.; Ransier,A.; Mohan,M.; Fedorova,N.; Tsitrin,T.; Puri,V.; Stockwell,T.; Amedeo,P.; Appalla,L.; Bishop,B.; Edworthy,P.; Gupta,N.; Hoover,J.; Katzel,D.; Schobel,S.; Shrivastava,S.; Thovarai,V.; Wang,S.; Bao,Y.; Sanders,R.; Zhdanov,S.; Kiryutin,B.; Lipman,D.J.; Tatusova,T.; Fouchier,R.A.M.
EPI613813	PB2	China	2013-Jan-01	EPI_ISL_188971	A/Anhui/DEWH72-01/2013		Import from public-domain	Wentworth,D.E.; Halpin,R.A.; Lin,X.; Bera,J.; Akopov,A.; Ransier,A.; Mohan,M.; Fedorova,N.; Tsitrin,T.; Puri,V.; Stockwell,T.; Amedeo,P.; Appalla,L.; Bishop,B.; Edworthy,P.; Gupta,N.; Hoover,J.; Katzel,D.; Schobel,S.; Shrivastava,S.; Thovarai,V.; Wang,S.; Bao,Y.; Sanders,R.; Zhdanov,S.; Kiryutin,B.; Lipman,D.J.; Tatusova,T.; Fouchier,R.A.M.
EPI578027	PB2	China	2014-Mar-18	EPI_ISL_176442	A/Shenzhen/SP118/2014		Import from public-domain	Lam,T.Y.; Zhou,B.; Wang,J.; Chai,Y.; Shen,Y.; Chen,X.; Ma,C.; Hong,W.; Chen,Y.; Zhang,Y.; Duan,L.; Chen,P.; Jiang,J.; Li,L.; Poon,L.M.; Webby,R.J.; Smith,D.K.; Leung,G.M.; Peiris,J.M.; Holmes,E.C.; Guan,Y.; Zhu,H.
EPI578020	PB2	China	2014-Mar-15	EPI_ISL_176441	A/Shenzhen/SP116/2014		Import from public-domain	Lam,T.Y.; Zhou,B.; Wang,J.; Chai,Y.; Shen,Y.; Chen,X.; Ma,C.; Hong,W.; Chen,Y.; Zhang,Y.; Duan,L.; Chen,P.; Jiang,J.; Li,L.; Poon,L.M.; Webby,R.J.; Smith,D.K.; Leung,G.M.; Peiris,J.M.; Holmes,E.C.; Guan,Y.; Zhu,H.
EPI578013	PB2	China	2014-Mar-12	EPI_ISL_176440	A/Shenzhen/SP113/2014		Import from public-domain	Lam,T.Y.; Zhou,B.; Wang,J.; Chai,Y.; Shen,Y.; Chen,X.; Ma,C.; Hong,W.; Chen,Y.; Zhang,Y.; Duan,L.; Chen,P.; Jiang,J.; Li,L.; Poon,L.M.; Webby,R.J.; Smith,D.K.; Leung,G.M.; Peiris,J.M.; Holmes,E.C.; Guan,Y.; Zhu,H.
EPI578006	PB2	China	2014-Feb-05	EPI_ISL_176439	A/Shenzhen/SP62/2014		Import from public-domain	Lam,T.Y.; Zhou,B.; Wang,J.; Chai,Y.; Shen,Y.; Chen,X.; Ma,C.; Hong,W.; Chen,Y.; Zhang,Y.; Duan,L.; Chen,P.; Jiang,J.; Li,L.; Poon,L.M.; Webby,R.J.; Smith,D.K.; Leung,G.M.; Peiris,J.M.; Holmes,E.C.; Guan,Y.; Zhu,H.
EPI577999	PB2	China	2014-Feb-15	EPI_ISL_176438	A/Shenzhen/SP75/2014		Import from public-domain	Lam,T.Y.; Zhou,B.; Wang,J.; Chai,Y.; Shen,Y.; Chen,X.; Ma,C.; Hong,W.; Chen,Y.; Zhang,Y.; Duan,L.; Chen,P.; Jiang,J.; Li,L.; Poon,L.M.; Webby,R.J.; Smith,D.K.; Leung,G.M.; Peiris,J.M.; Holmes,E.C.; Guan,Y.; Zhu,H.
EPI577992	PB2	China	2014-Jan-30	EPI_ISL_176437	A/Shenzhen/SP60/2014		Import from public-domain	Lam,T.Y.; Zhou,B.; Wang,J.; Chai,Y.; Shen,Y.; Chen,X.; Ma,C.; Hong,W.; Chen,Y.; Zhang,Y.; Duan,L.; Chen,P.; Jiang,J.; Li,L.; Poon,L.M.; Webby,R.J.; Smith,D.K.; Leung,G.M.; Peiris,J.M.; Holmes,E.C.; Guan,Y.; Zhu,H.
EPI578156	PB2	China	2014-Jan-25	EPI_ISL_176436	A/Shenzhen/SP58/2014		Import from public-domain	Lam,T.Y.; Zhou,B.; Wang,J.; Chai,Y.; Shen,Y.; Chen,X.; Ma,C.; Hong,W.; Chen,Y.; Zhang,Y.; Duan,L.; Chen,P.; Jiang,J.; Li,L.; Poon,L.M.; Webby,R.J.; Smith,D.K.; Leung,G.M.; Peiris,J.M.; Holmes,E.C.; Guan,Y.; Zhu,H.
EPI773751	PB2	China	2015-Mar-01	EPI_ISL_175287	A/Shantou/2011/2015		Shantou University Medical College	Farooqui,A;Liu,W;Kelvin,DJ;Zeng,T;Liu,Y;Zhang,L;Khan,A;Wu,X;Wu,R;Wu,S;Huang,L;Cai,Y;Kelvin,AA;Paquette,SG;Hu,K;Zheng,N;Chen,H;Xu,S;Lin,C;Sun,P;Yao,Z;Wang,J;Ma,H;Zhu,Z;Lin,P;Chen,W;Fang,X;Bermejo-Martin,JF;Leon,AJ
EPI773745	PB2	China	2015-Feb-07	EPI_ISL_175286	A/Shantou/2010/2015		Shantou University Medical College	Farooqui,A;Liu,W;Kelvin,DJ;Zeng,T;Liu,Y;Zhang,L;Khan,A;Wu,X;Wu,R;Wu,S;Huang,L;Cai,Y;Kelvin,AA;Paquette,SG;Hu,K;Zheng,N;Chen,H;Xu,S;Lin,C;Sun,P;Yao,Z;Wang,J;Ma,H;Zhu,Z;Lin,P;Chen,W;Fang,X;Bermejo-Martin,JF;Leon,AJ
EPI773727	PB2	China	2015-Feb-24	EPI_ISL_175284	A/Shantou/2006/2015		Shantou University Medical College	Farooqui,A;Liu,W;Kelvin,DJ;Zeng,T;Liu,Y;Zhang,L;Khan,A;Wu,X;Wu,R;Wu,S;Huang,L;Cai,Y;Kelvin,AA;Paquette,SG;Hu,K;Zheng,N;Chen,H;Xu,S;Lin,C;Sun,P;Yao,Z;Wang,J;Ma,H;Zhu,Z;Lin,P;Chen,W;Fang,X;Bermejo-Martin,JF;Leon,AJ
EPI773721	PB2	China	2015-Feb-21	EPI_ISL_175283	A/Shantou/2005/2015		Shantou University Medical College	Farooqui,A;Liu,W;Kelvin,DJ;Zeng,T;Liu,Y;Zhang,L;Khan,A;Wu,X;Wu,R;Wu,S;Huang,L;Cai,Y;Kelvin,AA;Paquette,SG;Hu,K;Zheng,N;Chen,H;Xu,S;Lin,C;Sun,P;Yao,Z;Wang,J;Ma,H;Zhu,Z;Lin,P;Chen,W;Fang,X;Bermejo-Martin,JF;Leon,AJ
EPI773714	PB2	China	2015-Feb-15	EPI_ISL_175282	A/Shantou/2004/2015		Shantou University Medical College	Farooqui,A;Liu,W;Kelvin,DJ;Zeng,T;Liu,Y;Zhang,L;Khan,A;Wu,X;Wu,R;Wu,S;Huang,L;Cai,Y;Kelvin,AA;Paquette,SG;Hu,K;Zheng,N;Chen,H;Xu,S;Lin,C;Sun,P;Yao,Z;Wang,J;Ma,H;Zhu,Z;Lin,P;Chen,W;Fang,X;Bermejo-Martin,JF;Leon,AJ
EPI773708	PB2	China	2015-Jan-24	EPI_ISL_175281	A/Shantou/2002/2015		Shantou University Medical College	Farooqui,A;Liu,W;Kelvin,DJ;Zeng,T;Liu,Y;Zhang,L;Khan,A;Wu,X;Wu,R;Wu,S;Huang,L;Cai,Y;Kelvin,AA;Paquette,SG;Hu,K;Zheng,N;Chen,H;Xu,S;Lin,C;Sun,P;Yao,Z;Wang,J;Ma,H;Zhu,Z;Lin,P;Chen,W;Fang,X;Bermejo-Martin,JF;Leon,AJ
EPI773702	PB2	China	2015-Jan-23	EPI_ISL_175280	A/Shantou/2001/2015		Shantou University Medical College	Farooqui,A;Liu,W;Kelvin,DJ;Zeng,T;Liu,Y;Zhang,L;Khan,A;Wu,X;Wu,R;Wu,S;Huang,L;Cai,Y;Kelvin,AA;Paquette,SG;Hu,K;Zheng,N;Chen,H;Xu,S;Lin,C;Sun,P;Yao,Z;Wang,J;Ma,H;Zhu,Z;Lin,P;Chen,W;Fang,X;Bermejo-Martin,JF;Leon,AJ
EPI773738	PB2	China	2015-Feb-16	EPI_ISL_174514	A/Shantou/2009/2015		Shantou University Medical College	Farooqui,A;Liu,W;Kelvin,DJ;Zeng,T;Liu,Y;Zhang,L;Khan,A;Wu,X;Wu,R;Wu,S;Huang,L;Cai,Y;Kelvin,AA;Paquette,SG;Hu,K;Zheng,N;Chen,H;Xu,S;Lin,C;Sun,P;Yao,Z;Wang,J;Ma,H;Zhu,Z;Lin,P;Chen,W;Fang,X;Bermejo-Martin,JF;Leon,AJ
EPI773733	PB2	China	2015-Mar-11	EPI_ISL_174513	A/Shantou/2008/2015	International Institute of Infection and Immunity, Shantou University Medical College	Shantou University Medical College	Farooqui,A;Liu,W;Kelvin,DJ;Zeng,T;Liu,Y;Zhang,L;Khan,A;Wu,X;Wu,R;Wu,S;Huang,L;Cai,Y;Kelvin,AA;Paquette,SG;Hu,K;Zheng,N;Chen,H;Xu,S;Lin,C;Sun,P;Yao,Z;Wang,J;Ma,H;Zhu,Z;Lin,P;Chen,W;Fang,X;Bermejo-Martin,JF;Leon,AJ
EPI566669	PB2	Hong Kong (SAR)	2015-Feb-22	EPI_ISL_173033	A/Hong Kong/8130773/2015	Hong Kong Department of Health	Hong Kong Department of Health	Mak,G.C.; Lo,J.Y.C.
EPI566128	PB2	China	2015-Jan-12	EPI_ISL_172828	A/Fujian/09273/2015		WHO Chinese National Influenza Center	Wang,Dayan;Gao,Rongbao;Yang,Lei;Chen,Wenbing;Zou,Shumei;Li,Xiyan;Guo,Junfeng;Dong,Jie;Xin,Li;Huang,Weijuan;Zhang,Ye;Bo,Hong;Wei,Hejiang;Zhou,Jianfang;Shu,Yuelong
EPI566121	PB2	China	2014-Nov-17	EPI_ISL_172827	A/Jiangsu/98342/2014		WHO Chinese National Influenza Center	Wang,Dayan;Gao,Rongbao;Yang,Lei;Chen,Wenbing;Zou,Shumei;Li,Xiyan;Guo,Junfeng;Dong,Jie;Xin,Li;Huang,Weijuan;Zhang,Ye;Bo,Hong;Wei,Hejiang;Zhou,Jianfang;Shu,Yuelong
EPI566113	PB2	China	2014-Nov-25	EPI_ISL_172826	A/Xinjiang/98692/2014		WHO Chinese National Influenza Center	Wang,Dayan;Gao,Rongbao;Yang,Lei;Chen,Wenbing;Zou,Shumei;Li,Xiyan;Guo,Junfeng;Dong,Jie;Xin,Li;Huang,Weijuan;Zhang,Ye;Bo,Hong;Wei,Hejiang;Zhou,Jianfang;Shu,Yuelong
EPI566105	PB2	China	2014-Nov-20	EPI_ISL_172825	A/XinjiangBintuan/99118/2014		WHO Chinese National Influenza Center	Wang,Dayan;Gao,Rongbao;Yang,Lei;Chen,Wenbing;Zou,Shumei;Li,Xiyan;Guo,Junfeng;Dong,Jie;Xin,Li;Huang,Weijuan;Zhang,Ye;Bo,Hong;Wei,Hejiang;Zhou,Jianfang;Shu,Yuelong
EPI566097	PB2	China	2014-Oct-25	EPI_ISL_172824	A/XinjiangBintuan/99117/2014		WHO Chinese National Influenza Center	Wang,Dayan;Gao,Rongbao;Yang,Lei;Chen,Wenbing;Zou,Shumei;Li,Xiyan;Guo,Junfeng;Dong,Jie;Xin,Li;Huang,Weijuan;Zhang,Ye;Bo,Hong;Wei,Hejiang;Zhou,Jianfang;Shu,Yuelong
EPI566089	PB2	China	2014-Nov-27	EPI_ISL_172823	A/Guangdong/02496/2014		WHO Chinese National Influenza Center	Wang,Dayan;Gao,Rongbao;Yang,Lei;Chen,Wenbing;Zou,Shumei;Li,Xiyan;Guo,Junfeng;Dong,Jie;Xin,Li;Huang,Weijuan;Zhang,Ye;Bo,Hong;Wei,Hejiang;Zhou,Jianfang;Shu,Yuelong
EPI566081	PB2	China	2015-Jan-09	EPI_ISL_172822	A/Guizhou/03240/2015		WHO Chinese National Influenza Center	Wang,Dayan;Gao,Rongbao;Yang,Lei;Chen,Wenbing;Zou,Shumei;Li,Xiyan;Guo,Junfeng;Dong,Jie;Xin,Li;Huang,Weijuan;Zhang,Ye;Bo,Hong;Wei,Hejiang;Zhou,Jianfang;Shu,Yuelong
EPI566073	PB2	China	2014-Dec-27	EPI_ISL_172821	A/Jiangsu/06306/2014		WHO Chinese National Influenza Center	Wang,Dayan;Gao,Rongbao;Yang,Lei;Chen,Wenbing;Zou,Shumei;Li,Xiyan;Guo,Junfeng;Dong,Jie;Xin,Li;Huang,Weijuan;Zhang,Ye;Bo,Hong;Wei,Hejiang;Zhou,Jianfang;Shu,Yuelong
EPI566065	PB2	China	2015-Jan-08	EPI_ISL_172820	A/Xinjiang/05845/2015		WHO Chinese National Influenza Center	Wang,Dayan;Gao,Rongbao;Yang,Lei;Chen,Wenbing;Zou,Shumei;Li,Xiyan;Guo,Junfeng;Dong,Jie;Xin,Li;Huang,Weijuan;Zhang,Ye;Bo,Hong;Wei,Hejiang;Zhou,Jianfang;Shu,Yuelong
EPI566057	PB2	China	2014-Nov-28	EPI_ISL_172819	A/Environment/Xinjiang/98679/2014		WHO Chinese National Influenza Center	Wang,Dayan;Gao,Rongbao;Yang,Lei;Chen,Wenbing;Zou,Shumei;Li,Xiyan;Guo,Junfeng;Dong,Jie;Xin,Li;Huang,Weijuan;Zhang,Ye;Bo,Hong;Wei,Hejiang;Zhou,Jianfang;Shu,Yuelong
EPI566049	PB2	China	2014-Dec-25	EPI_ISL_172818	A/Xinjiang/05916/2014		WHO Chinese National Influenza Center	Wang,Dayan;Gao,Rongbao;Yang,Lei;Chen,Wenbing;Zou,Shumei;Li,Xiyan;Guo,Junfeng;Dong,Jie;Xin,Li;Huang,Weijuan;Zhang,Ye;Bo,Hong;Wei,Hejiang;Zhou,Jianfang;Shu,Yuelong
EPI566041	PB2	China	2015-Jan-06	EPI_ISL_172817	A/Guangdong/15SF010/2015		WHO Chinese National Influenza Center	Wang,Dayan;Gao,Rongbao;Yang,Lei;Chen,Wenbing;Zou,Shumei;Li,Xiyan;Guo,Junfeng;Dong,Jie;Xin,Li;Huang,Weijuan;Zhang,Ye;Bo,Hong;Wei,Hejiang;Zhou,Jianfang;Shu,Yuelong
EPI566033	PB2	China	2015-Jan-12	EPI_ISL_172816	A/Guangdong/15SF018/2015		WHO Chinese National Influenza Center	Wang,Dayan;Gao,Rongbao;Yang,Lei;Chen,Wenbing;Zou,Shumei;Li,Xiyan;Guo,Junfeng;Dong,Jie;Xin,Li;Huang,Weijuan;Zhang,Ye;Bo,Hong;Wei,Hejiang;Zhou,Jianfang;Shu,Yuelong
EPI559490	PB2	China	2013-Apr-01	EPI_ISL_171013	A/Zhejiang/DTID-ZJU02N/2013		Import from public-domain	Song,W.; Wang,P.; Mok,B.W.; Lau,S.Y.; Huang,X.; Wu,W.L.; Zheng,M.; Wen,X.; Yang,S.; Chen,Y.; Li,L.; Yuen,K.Y.; Chen,H.; Wu,N.P.; Yang,S.G.; Wo,J.E.; Yao,H.P.; Liang,W.F.; Cui,D.W.; Wu,H.B.; Song,W.J.; Chen,H.L.; Li,L.J.
EPI559489	PB2	China	2013-Apr-01	EPI_ISL_171012	A/Zhejiang/DTID-ZJU02K/2013		Import from public-domain	Song,W.; Wang,P.; Mok,B.W.; Lau,S.Y.; Huang,X.; Wu,W.L.; Zheng,M.; Wen,X.; Yang,S.; Chen,Y.; Li,L.; Yuen,K.Y.; Chen,H.; Wu,N.P.; Yang,S.G.; Wo,J.E.; Yao,H.P.; Liang,W.F.; Cui,D.W.; Wu,H.B.; Song,W.J.; Chen,H.L.; Li,L.J.
EPI559488	PB2	China	2013-Apr-01	EPI_ISL_171011	A/Zhejiang/DTID-ZJU02R/2013		Import from public-domain	Song,W.; Wang,P.; Mok,B.W.; Lau,S.Y.; Huang,X.; Wu,W.L.; Zheng,M.; Wen,X.; Yang,S.; Chen,Y.; Li,L.; Yuen,K.Y.; Chen,H.; Wu,N.P.; Yang,S.G.; Wo,J.E.; Yao,H.P.; Liang,W.F.; Cui,D.W.; Wu,H.B.; Song,W.J.; Chen,H.L.; Li,L.J.
EPI559414	PB2	Hong Kong (SAR)	2015-Jan-23	EPI_ISL_170981	A/Hong Kong/2550/2015	Hong Kong Department of Health	Hong Kong Department of Health	Mak,G.C.; Cheng,P.K.C.; Lo,J.Y.C.
EPI552396	PB2	China	2014-Nov-25	EPI_ISL_169131	A/Zhejiang/17/2014	Zhejiang Provincial Center for Disease Control and Prevention	Zhejiang Provincial Center for Disease Control and Prevention	Sun, Y; Zhang, YJ
EPI542309	PB2	China	2013-Apr-17	EPI_ISL_166490	A/Shanghai/MH01/2013		Import from public-domain	Zhao,B.H.; Zhang,X.; Pei,E.L.; Teng,Z.; Yu,X.L.; Shen,J.R.; Gao,Y.; Yuan,Z.G.; Wu,F.
EPI542090	PB2	China	2014-Feb-08	EPI_ISL_166435	A/Zhejiang/LS01/2014		Import from public-domain	Lei,Y.L.; Wang,X.G.; Mao,H.Y.
EPI541771	PB2	Taiwan	2013-Dec-27	EPI_ISL_166324	A/Taiwan/3/2013	Centers for Disease Control	Centers for Disease Control, R.O.C. (Taiwan)
EPI535200	PB2	China	2014-Feb-10	EPI_ISL_164007	A/Hangzhou/118/2014	Hangzhou Center for Disease Control and Prevention	Hangzhou Center for Disease Control and Prevention	Pu,XY;Li,J;Yu,XF;Kou,Y;Zhou,YY;Qian,X;Pan,JC
EPI535192	PB2	China	2014-Feb-09	EPI_ISL_164006	A/Hangzhou/112/2014	Hangzhou Center for Disease Control and Prevention	Hangzhou Center for Disease Control and Prevention	Pu,XY;Li,J;Yu,XF;Kou,Y;Zhou,YY;Qian,X;Pan,JC
EPI535184	PB2	China	2014-Feb-03	EPI_ISL_164005	A/Shaoxing/70/2014	Hangzhou Center for Disease Control and Prevention	Hangzhou Center for Disease Control and Prevention	Pu,XY;Li,J;Yu,XF;Kou,Y;Zhou,YY;Qian,X;Pan,JC
EPI535176	PB2	China	2014-Jan-29	EPI_ISL_164004	A/Hangzhou/49/2014	Hangzhou Center for Disease Control and Prevention	Hangzhou Center for Disease Control and Prevention	Pu,XY;Li,J;Yu,XF;Kou,Y;Zhou,YY;Qian,X;Pan,JC
EPI535168	PB2	China	2014-Jan-24	EPI_ISL_164003	A/Hangzhou/40/2014	Hangzhou Center for Disease Control and Prevention	Hangzhou Center for Disease Control and Prevention	Pu,XY;Li,J;Yu,XF;Kou,Y;Zhou,YY;Qian,X;Pan,JC
EPI535160	PB2	China	2014-Jan-23	EPI_ISL_164002	A/Hangzhou/39/2014	Hangzhou Center for Disease Control and Prevention	Hangzhou Center for Disease Control and Prevention	Pu,XY;Li,J;Yu,XF;Kou,Y;Zhou,YY;Qian,X;Pan,JC
EPI535152	PB2	China	2014-Jan-23	EPI_ISL_164001	A/Hangzhou/38/2014	Hangzhou Center for Disease Control and Prevention	Hangzhou Center for Disease Control and Prevention	Pu,XY;Li,J;Yu,XF;Kou,Y;Zhou,YY;Qian,X;Pan,JC
EPI535144	PB2	China	2014-Jan-23	EPI_ISL_164000	A/Hangzhou/35/2014	Hangzhou Center for Disease Control and Prevention	Hangzhou Center for Disease Control and Prevention	Pu,XY;Li,J;Yu,XF;Kou,Y;Zhou,YY;Qian,X;Pan,JC
EPI535136	PB2	China	2014-Jan-20	EPI_ISL_163999	A/Hangzhou/30/2014	Hangzhou Center for Disease Control and Prevention	Hangzhou Center for Disease Control and Prevention	Pu,XY;Li,J;Yu,XF;Kou,Y;Zhou,YY;Qian,X;Pan,JC
EPI535128	PB2	China	2014-Jan-18	EPI_ISL_163998	A/Jiaxing/20/2014	Hangzhou Center for Disease Control and Prevention	Hangzhou Center for Disease Control and Prevention	Pu,XY;Li,J;Yu,XF;Kou,Y;Zhou,YY;Qian,X;Pan,JC
EPI535120	PB2	China	2014-Jan-18	EPI_ISL_163997	A/Hangzhou/19/2014	Hangzhou Center for Disease Control and Prevention	Hangzhou Center for Disease Control and Prevention	Pu,XY;Li,J;Yu,XF;Kou,Y;Zhou,YY;Qian,X;Pan,JC
EPI531816	PB2	China	2014-Apr-19	EPI_ISL_162621	A/Shantou/1004/2014	Shantou University Medical College	Shantou University Medical College
EPI531813	PB2	China	2014-Apr-11	EPI_ISL_162620	A/Shantou/1003/2014	Shantou University Medical College	Shantou University Medical College
EPI531810	PB2	China	2014-Mar-23	EPI_ISL_162619	A/Shantou/1002/2014	Shantou University Medical College	Shantou University Medical College
EPI531807	PB2	China	2014-Mar-10	EPI_ISL_162618	A/Shantou/1001/2014	Shantou University Medical College	Shantou University Medical College
EPI531475	PB2	China	2014-Jan-03	EPI_ISL_162470	A/Shanghai/01/2014		Import from public-domain	Zhang,W.; Xu,L.; Tian,D.; Liu,Y.; Hu,Y.
EPI531124	PB2	China	2013-Jan-01	EPI_ISL_162351	A/Anhui/1-DEWH730/2013		Import from public-domain	Wentworth,D.E.; Halpin,R.A.; Lin,X.; Bera,J.; Akopov,A.; Ransier,A.; Mohan,M.; Fedorova,N.; Tsitrin,T.; Puri,V.; Stockwell,T.; Amedeo,P.; Appalla,L.; Bishop,B.; Edworthy,P.; Gupta,N.; Hoover,J.; Katzel,D.; Schobel,S.; Shrivastava,S.; Thovarai,V.; Wang,S.; Bao,Y.; Sanders,R.; Zhdanov,S.; Kiryutin,B.; Lipman,D.J.; Tatusova,T.; Richt,J.A.
EPI530822	PB2	Taiwan	2013-Jun-01	EPI_ISL_162218	A/Taiwan/1/2013		Import from public-domain	Yang,J.-R.; Liu,M.-T.; Wu,H.-S.
EPI531800	PB2	Taiwan	2014-Apr-24	EPI_ISL_160436	A/Taiwan/2/2014	Centers for Disease Control	Centers for Disease Control, R.O.C. (Taiwan)
EPI531794	PB2	Taiwan	2014-Apr-21	EPI_ISL_160435	A/Taiwan/1/2014	Centers for Disease Control	Centers for Disease Control, R.O.C. (Taiwan)
EPI520861	PB2	Hong Kong (SAR)	2014-Apr-08	EPI_ISL_160290	A/Hong Kong/5731/2014	Hong Kong Department of Health	Hong Kong Department of Health	Mak,G.C.; Cheng,P.K.C.; Lo,J.Y.C.
EPI509998	PB2	China	2014-Jan-08	EPI_ISL_157771	A/Guizhou/01502/2014		WHO Chinese National Influenza Center
EPI509885	PB2	Hong Kong (SAR)	2014-Mar-17	EPI_ISL_157703	A/Hong Kong/8113530/2014	Hong Kong Department of Health	Hong Kong Department of Health	Mak,G.C.; Cheng,P.K.C.; Lo,J.Y.C.
EPI509877	PB2	Hong Kong (SAR)	2014-Mar-01	EPI_ISL_157702	A/Hong Kong/4495/2014	Hong Kong Department of Health	Hong Kong Department of Health	Mak,G.C.; Cheng,P.K.C.; Lo,J.Y.C.
EPI507084	PB2	Hong Kong (SAR)	2014-Feb-12	EPI_ISL_156471	A/Hong Kong/3263/2014	Hong Kong Department of Health	Hong Kong Department of Health	Mak,G.C.; Cheng,P.K.C.; Lo,J.Y.C.
EPI506230	PB2	China	2013-Dec-17	EPI_ISL_156304	A/Guangdong/05/2013		Import from public-domain	Guan,D.; Xiao,H.; Zeng,X.; Wu,J.; Ni,H.; Zhang,X.; Zou,L.; Liang,L.; Ke,C.; Lin,J.; Zhang,Y.
EPI504721	PB2	China	2013-May-01	EPI_ISL_155653	A/Shanghai/5190T/2013		Import from public-domain	Hu,Y.
EPI502370	PB2	Hong Kong (SAR)	2014-Jan-28	EPI_ISL_154553	A/Hong Kong/2212982/2014	Hong Kong Department of Health	Hong Kong Department of Health	Mak,G.C.; Cheng,P.K.C.; Lo,J.Y.C.
EPI499905	PB2	China	2013-Nov-04	EPI_ISL_153848	A/Guangdong/02/2013		Import from public-domain	Guan,D.; Xiao,H.; Zeng,X.; Wu,J.; Ni,H.; Zhang,X.; Zou,L.; Liang,L.; Ke,C.; Lin,J.; Zhang,Y.
EPI476698	PB2	China	2013-Aug-10	EPI_ISL_148417	A/Guangdong/1/2013		Import from public-domain	Guan,W.; Li,X.; Zhang,X.; Ni,H.; Ke,C.; Yang,Z.; Ding,G.; He,J.; Pan,S.; Huang,J.; Lin,J.; Wu,S.; Zheng,K.; Li,R.; Wang,Y.; Lin,Y.; Chen,L.; Zhou,R.; Li,Y.; Chen,R.; Zhang,Y.; Zhong,N.
EPI469539	PB2	China	2013-Apr-20	EPI_ISL_146437	A/Jiangsu/1/2013		Import from public-domain	Ren,X.; Yang,F.; Hu,Y.; Zhang,T.; Liu,L.; Dong,J.; Sun,L.; Zhu,Y.; Xiao,Y.; Li,L.; Yang,J.; Wang,J.; Jin,Q.
EPI469531	PB2	China	2013-Apr-20	EPI_ISL_146436	A/Jiangsu/2/2013		Import from public-domain	Ren,X.; Yang,F.; Hu,Y.; Zhang,T.; Liu,L.; Dong,J.; Sun,L.; Zhu,Y.; Xiao,Y.; Li,L.; Yang,J.; Wang,J.; Jin,Q.
EPI468964	PB2	China	2013-Apr-20	EPI_ISL_146161	A/Jiangsu/1/2013		Import from public-domain	Ren,X.; Yang,F.; Hu,Y.; Zhang,T.; Liu,L.; Dong,J.; Sun,L.; Zhu,Y.; Xiao,Y.; Li,L.; Yang,J.; Wang,J.; Jin,Q.
EPI467333	PB2	China	2013-Apr-02	EPI_ISL_145654	A/environment/Wuxi/1/2013		Import from public-domain	Qi,X.; Qian,Y.H.; Bao,C.J.; Guo,X.L.; Cui,L.B.; Tang,F.Y.; Ji,H.; Huang,Y.; Cai,P.Q.; Lu,B.; Xu,K.; Shi,C.; Zhu,F.C.; Zhou,M.H.; Wang,H.; Zhao,K.; Yu,H.; Shi,Z.; Ge,Y.
EPI467310	PB2	China	2013-Mar-31	EPI_ISL_145652	A/Wuxi/2/2013		Import from public-domain	Qi,X.; Qian,Y.H.; Bao,C.J.; Guo,X.L.; Cui,L.B.; Tang,F.Y.; Ji,H.; Huang,Y.; Cai,P.Q.; Lu,B.; Xu,K.; Shi,C.; Zhu,F.C.; Zhou,M.H.; Wang,H.; Zhao,K.; Yu,H.; Deng,F.; Qin,Y.; Shi,Z.
EPI467302	PB2	China	2013-Mar-31	EPI_ISL_145651	A/Wuxi/1/2013		Import from public-domain	Qi,X.; Qian,Y.H.; Bao,C.J.; Guo,X.L.; Cui,L.B.; Tang,F.Y.; Ji,H.; Huang,Y.; Cai,P.Q.; Lu,B.; Xu,K.; Shi,C.; Zhu,F.C.; Zhou,M.H.; Wang,H.; Zhao,K.; Yu,H.; Deng,F.; Qin,Y.; Shi,Z.
EPI460772	PB2	China	2013-Apr-25	EPI_ISL_143664	A/Nanjing/5/2013		Jiangsu Provincial Center for Disease Control & Prevention
EPI460764	PB2	China	2013-Apr-19	EPI_ISL_143663	A/Nanjing/3/2013	Jiangsu Provincial Center for Disease Control and Prevention	Jiangsu Provincial Center for Disease Control & Prevention
EPI460748	PB2	China	2013-Apr-09	EPI_ISL_143658	A/Nanjing/f0874/2013	Jiangsu Provincial Center for Disease Control and Prevention	Jiangsu Provincial Center for Disease Control & Prevention
EPI461483	PB2	China	2013-Apr-24	EPI_ISL_143556	A/Nanchang/1/2013		Import from public-domain	Zhou,X.; Xia,W.; Ni,X.; Fan,G.; Li,H.; Chen,H.
EPI453827	PB2	China	2013-Apr-24	EPI_ISL_142319	A/Fujian/1/2013		Import from public-domain	Weng,Y.; Zhang,Y.; Xie,J.; Huang,M.; Chen,W.; He,W.; Wu,B.; Wang,J.; Yang,S.; Zheng,K.; Yan,Y.
EPI453601	PB2	China	2013-Mar-28	EPI_ISL_142305	A/Nanjing/1/2013		Import from public-domain	Bao,C.; Cui,L.; Zhou,M.; Guo,X.; Hong,L.; Gao,G.F.; Wang,H.; Qi,X.; Ge,Y.; Zhao,K.; Li,W.; Tang,F.; Shi,Z.; Li,Y.
EPI453482	PB2	China	2013-Apr-01	EPI_ISL_142231	A/Zhejiang/HZ1/2013		Import from public-domain	Wu,H.; Wu,N.; Guo,C.; Li,L.
EPI452265	PB2	Taiwan	2013-Apr-22	EPI_ISL_142188	A/Taiwan/T02081/2013		Import from public-domain	Chang,S.-C.; Chang,S.-Y.
EPI452257	PB2	Taiwan	2013-Apr-22	EPI_ISL_142187	A/Taiwan/S02076/2013		Import from public-domain	Chang,S.-C.; Chang,S.-Y.
EPI451328	PB2	China	2013-May-01	EPI_ISL_142073	A/Shanghai/Patient5/2013	Shanghai public health clinical center	Institut Pasteur of Shanghai, CAS
EPI451277	PB2	China	2013-May-01	EPI_ISL_142045	A/Shanghai/Patient3/2013	Shanghai public health clinical center	Institut Pasteur of Shanghai, CAS
EPI451269	PB2	China	2013-May-01	EPI_ISL_142044	A/Shanghai/Patient6/2013	Shanghai public health clinical center	Institut Pasteur of Shanghai, CAS
EPI451015	PB2		2013-May-01	EPI_ISL_141911	A/Shanghai/patient1/2013	Shanghai public health clinical center	Institut Pasteur of Shanghai, CAS	Yunwen, Hu; Zhenghong, Yuan
EPI450847	PB2	China	2013-Apr-19	EPI_ISL_141776	A/Hangzhou/327/2013	Hangzhou Center for Disease Control and Prevention	Hangzhou Center for Disease Control and Prevention	Li,J;Jin,T;Yu,XF;Pu,XY;Liu,J;Pan,JC
EPI450839	PB2	China	2013-Apr-17	EPI_ISL_141775	A/Hangzhou/254/2013	Hangzhou Center for Disease Control and Prevention	Hangzhou Center for Disease Control and Prevention	Li,J;Jin,T;Yu,XF;Pu,XY;Liu,J;Pan,JC
EPI453647	PB2	China	2013-Apr-26	EPI_ISL_141601	A/Nanjing/M2/2013	Jiangsu Provincial Center for Disease Control and Prevention	Jiangsu Provincial Center for Disease Control & Prevention
EPI449026	PB2	China	2013-Mar-05	EPI_ISL_141484	A/Shanghai/4665T/2013		Import from public-domain	Meng,Z.; Song,Z.; Guan,W.; Shi,B.; Zhang,Z.; Yuan,Z.; Hu,Y.; Zhang,X.; Xu,J.
EPI449025	PB2	China	2013-Feb-27	EPI_ISL_141483	A/Shanghai/4659T/2013		Import from public-domain	Meng,Z.; Song,Z.; Guan,W.; Shi,B.; Zhang,Z.; Yuan,Z.; Hu,Y.; Zhang,X.; Xu,J.
EPI448933	PB2	China	2013-Mar-05	EPI_ISL_141437	A/Shanghai/02/2013		Import from public-domain	Zhu,H.; Wang,D.; Kelvin,D.J.; Li,L.; Zheng,Z.; Yoon,S.W.; Wong,S.S.; Farooqui,A.; Wang,J.; Banner,D.; Chen,R.; Zheng,R.; Zhou,J.; Zhang,Y.; Hong,W.; Dong,W.; Cai,Q.; Roehrl,M.A.; Huang,S.H.; Calvin,A.A.; Yao,T.; Zhou,B.; Chen,X.; Leung,G.; Poon,L.; Webster,R.G.; Webby,R.J.; Peiris,J.; Guan,Y.; Shu,Y.; Leung,G.M.; Poon,L.L.; Peiris,J.S.
EPI445909	PB2	Taiwan	2013-Apr-24	EPI_ISL_140356	A/Taiwan/1/2013	National Influenza Center, Centers for Disease Control	Centers for Disease Control, R.O.C. (Taiwan)	Ji-Rong, Yang; Ming-Tsan, Liu; Ho-Sheng, Wu
EPI443640	PB2	China	2013-Apr-11	EPI_ISL_139904	A/Hangzhou/173/2013	Hangzhou Center for Disease Control and Prevention	Hangzhou Center for Disease Control and Prevention	Li,J;Yu,XF;Pu,XY;Xie,L;Sun,YX;Xiao,HX;Wang,FJ;Din,H;Wu,Y;Liu,D;Zhao,GQ;Liu,J;Pan,JC
EPI443632	PB2	China	2013-Apr-11	EPI_ISL_139903	A/Hangzhou/169/2013	Hangzhou Center for Disease Control and Prevention	Hangzhou Center for Disease Control and Prevention	Li,J;Yu,XF;Pu,XY;Xie,L;Sun,YX;Xiao,HX;Wang,FJ;Din,H;Wu,Y;Liu,D;Zhao,GQ;Liu,J;Pan,JC
EPI443039	PB2	China	2013-Apr-03	EPI_ISL_139653	A/Zhejiang/2/2013	Zhejiang Provincial Center for Disease Control and Prevention	Zhejiang Provincial Center for Disease Control and Prevention	Sun, Y; Zhang, YJ
EPI443031	PB2	China	2013-Mar-24	EPI_ISL_139652	A/Zhejiang/1/2013	Zhejiang Provincial Center for Disease Control and Prevention	Zhejiang Provincial Center for Disease Control and Prevention	Sun, Y; Zhang, YJ
EPI447944	PB2	China	2013-Mar-25	EPI_ISL_139651	A/Zhejiang/01/2013		WHO Chinese National Influenza Center	Wang,Dayan;Gao,Rongbao;Yang,Lei;Zhou,Shumei;Li,Xiyan;Zhou,Jianfang;Zhu,Wenfei;Guo,Junfeng;Li,Xiaodan;Dong,Jie;Huang,Weijuan;Zhang,Ye;Dong,Libo;Zhao,Xiang;Lu,Jian;Lan,Yu;Shu,Yuelong
EPI447951	PB2	China	2013-Mar-09	EPI_ISL_139650	A/Shanghai/4/2013		WHO Chinese National Influenza Center	Wang,Dayan;Gao,Rongbao;Yang,Lei;Zhou,Shumei;Li,Xiyan;Zhou,Jianfang;Zhu,Wenfei;Guo,Junfeng;Li,Xiaodan;Dong,Jie;Huang,Weijuan;Zhang,Ye;Dong,Libo;Zhao,Xiang;Lu,Jian;Lan,Yu;Shu,Yuelong
EPI447961	PB2	China	2013-Feb-27	EPI_ISL_139649	A/Shanghai/3/2013		WHO Chinese National Influenza Center	Wang,Dayan;Gao,Rongbao;Yang,Lei;Zhou,Shumei;Li,Xiyan;Zhou,Jianfang;Zhu,Wenfei;Guo,Junfeng;Li,Xiaodan;Dong,Jie;Huang,Weijuan;Zhang,Ye;Dong,Libo;Zhao,Xiang;Lu,Jian;Lan,Yu;Shu,Yuelong
EPI442712	PB2	China	2013-Apr-02	EPI_ISL_139499	A/Hangzhou/3/2013	Hangzhou Center for Disease Control and Prevention	Hangzhou Center for Disease Control and Prevention	Jing-Cao, Pan
EPI442709	PB2	China	2013-Mar-25	EPI_ISL_139498	A/Hangzhou/2/2013	Hangzhou Center for Disease Control and Prevention	Hangzhou Center for Disease Control and Prevention	Jing-Cao, Pan
EPI441801	PB2	China	2013-Apr-03	EPI_ISL_139364	A/Zhejiang/DTID-ZJU01/2013		Import from public-domain	Chen,H.-L.; Yuen,K.-Y.; Chen,Y.; Wu,N.P.; Yang,S.G.; Wo,J.E.; Yao,H.P.; Liang,W.F.; Cui,D.W.; Wu,H.B.; Li,L.J.
EPI919604	PB2	China	2017-Jan-03	EPI_ISL_249309	A/Guangdong/17SF003/2016		WHO Chinese National Influenza Center
EPI919596	PB2	China	2017-Jan-12	EPI_ISL_249308	A/Guangdong/17SF006/2017		WHO Chinese National Influenza Center
EPI918730	PB2	China	2017-Jan-14	EPI_ISL_249102	A/Qingyuan/GIRD1/2017	State Key Laboratory of Reipiratory Disease (Guangzhou Medical University)	Guangzhou Institute of Respiratory Diseases (GIRD)	Wenda Guan,PhD; Wenjun Song,PhD; Jianfeng He,MD; Changwen Ke,MD; Zifeng Yang,PhD; Haibo Zhou,MD; Qinhan Lin,MD; Yonghui Zhang,MD; Nanshan Zhong,MD
EPI888081	PB2	China	2016-Nov-16	EPI_ISL_242901	A/Fujian/54840/2016		WHO Chinese National Influenza Center	Wang,Dayan;Zhou,Shumei;Li,Xiyan;Li,Xiaodan;Zhang,Ye;Bo,Hong;Shu,Yuelong
EPI888073	PB2	China	2016-Dec-21	EPI_ISL_242900	A/Anhui/60926/2016		WHO Chinese National Influenza Center	Wang,Dayan;Zhou,Shumei;Li,Xiyan;Li,Xiaodan;Zhang,Ye;Bo,Hong;Shu,Yuelong
EPI888065	PB2	China	2016-Dec-19	EPI_ISL_242899	A/Jiangsu/60452/2016		WHO Chinese National Influenza Center	Wang,Dayan;Zhou,Shumei;Li,Xiyan;Li,Xiaodan;Zhang,Ye;Bo,Hong;Shu,Yuelong
EPI888057	PB2	China	2016-Dec-19	EPI_ISL_242898	A/Anhui/60935/2016		WHO Chinese National Influenza Center	Wang,Dayan;Zhou,Shumei;Li,Xiyan;Li,Xiaodan;Zhang,Ye;Bo,Hong;Shu,Yuelong
EPI888049	PB2	China	2016-Dec-19	EPI_ISL_242897	A/Anhui/60934/2016	Anhui Provincial Center for Disease Control and Prevention	WHO Chinese National Influenza Center	Wang,Dayan;Zhou,Shumei;Li,Xiyan;Li,Xiaodan;Zhang,Ye;Bo,Hong;Shu,Yuelong
EPI888041	PB2	China	2016-Dec-19	EPI_ISL_242896	A/Anhui/60933/2016	Anhui Provincial Center for Disease Control and Prevention	WHO Chinese National Influenza Center	Wang,Dayan;Zhou,Shumei;Li,Xiyan;Li,Xiaodan;Zhang,Ye;Bo,Hong;Shu,Yuelong
EPI888033	PB2	China	2016-Dec-13	EPI_ISL_242895	A/Anhui/60931/2016	Anhui Provincial Center for Disease Control and Prevention	WHO Chinese National Influenza Center	Wang,Dayan;Zhou,Shumei;Li,Xiyan;Li,Xiaodan;Zhang,Ye;Bo,Hong;Shu,Yuelong
EPI888025	PB2	China	2016-Dec-19	EPI_ISL_242894	A/Anhui/60932/2016		WHO Chinese National Influenza Center	Wang,Dayan;Zhou,Shumei;Li,Xiyan;Li,Xiaodan;Zhang,Ye;Bo,Hong;Shu,Yuelong
EPI888017	PB2	China	2016-Dec-15	EPI_ISL_242893	A/Anhui/60929/2016		WHO Chinese National Influenza Center	Wang,Dayan;Zhou,Shumei;Li,Xiyan;Li,Xiaodan;Zhang,Ye;Bo,Hong;Shu,Yuelong
EPI888009	PB2	China	2016-Dec-15	EPI_ISL_242892	A/Anhui/60928/2016		WHO Chinese National Influenza Center	Wang,Dayan;Zhou,Shumei;Li,Xiyan;Li,Xiaodan;Zhang,Ye;Bo,Hong;Shu,Yuelong
EPI888001	PB2	China	2016-Dec-21	EPI_ISL_242891	A/Anhui/60925/2016		WHO Chinese National Influenza Center	Wang,Dayan;Zhou,Shumei;Li,Xiyan;Li,Xiaodan;Zhang,Ye;Bo,Hong;Shu,Yuelong
EPI887993	PB2	China	2016-Dec-22	EPI_ISL_242890	A/Anhui/60924/2016	Anhui Provincial Center for Disease Control and Prevention	WHO Chinese National Influenza Center	Wang,Dayan;Zhou,Shumei;Li,Xiyan;Li,Xiaodan;Zhang,Ye;Bo,Hong;Shu,Yuelong
EPI887985	PB2	China	2016-Dec-18	EPI_ISL_242889	A/Anhui/60927/2016		WHO Chinese National Influenza Center	Wang,Dayan;Zhou,Shumei;Li,Xiyan;Li,Xiaodan;Zhang,Ye;Bo,Hong;Shu,Yuelong
EPI887977	PB2	China	2016-Dec-13	EPI_ISL_242888	A/Guangdong/60061/2016	Guangdong Provincial Center for Disease Control and Prevention	WHO Chinese National Influenza Center	Wang,Dayan;Zhou,Shumei;Li,Xiyan;Li,Xiaodan;Zhang,Ye;Bo,Hong;Shu,Yuelong
EPI887945	PB2	China	2016-Dec-16	EPI_ISL_242884	A/Anhui/60936/2016		WHO Chinese National Influenza Center	Wang,Dayan;Zhou,Shumei;Li,Xiyan;Li,Xiaodan;Zhang,Ye;Bo,Hong;Shu,Yuelong
EPI756012	PB2	China	2013-Apr-26	EPI_ISL_220945	A/Jiangsu/Wuxi04/2013	Beijing Institute of Microbiology and Epidemiology	Beijing Institute of Microbiology and Epidemiology	Maijuan,Ma;Guangyuan,Ma;Shanhui,Chen
EPI712923	PB2	Hong Kong (SAR)	2016-Feb-12	EPI_ISL_212471	A/Hong Kong/VB16021618/2016	Hong Kong Department of Health	Hong Kong Department of Health	Mak,G.C.; Lo,J.Y.C.
EPI637968	PB2	China	2013-Jan-01	EPI_ISL_194449	A/Anhui/1-YK_RG182/2013		Import from public-domain	Das,S.R.; Halpin,R.A.; Lin,X.; Simenauer,A.; Akopov,A.; Fedorova,N.; Puri,V.; Stockwell,T.; Amedeo,P.; Bishop,B.; Katzel,D.; Schobel,S.; Shrivastava,S.; Neumann,G.; Bao,Y.; Sanders,R.; Zhdanov,S.; Kiryutin,B.; Lipman,D.J.; Tatusova,T.; Kawaoka,Y.
EPI638108	PB2	China	2013-Jan-01	EPI_ISL_194448	A/Anhui/1-YK_RG202/2013		Import from public-domain	Das,S.R.; Halpin,R.A.; Lin,X.; Simenauer,A.; Akopov,A.; Fedorova,N.; Puri,V.; Stockwell,T.; Amedeo,P.; Bishop,B.; Katzel,D.; Schobel,S.; Shrivastava,S.; Neumann,G.; Bao,Y.; Sanders,R.; Zhdanov,S.; Kiryutin,B.; Lipman,D.J.; Tatusova,T.; Kawaoka,Y.
EPI638101	PB2	China	2013-Jan-01	EPI_ISL_194447	A/Anhui/1-YK_RG201/2013		Import from public-domain	Das,S.R.; Halpin,R.A.; Lin,X.; Simenauer,A.; Akopov,A.; Fedorova,N.; Puri,V.; Stockwell,T.; Amedeo,P.; Bishop,B.; Katzel,D.; Schobel,S.; Shrivastava,S.; Neumann,G.; Bao,Y.; Sanders,R.; Zhdanov,S.; Kiryutin,B.; Lipman,D.J.; Tatusova,T.; Kawaoka,Y.
EPI638094	PB2	China	2013-Jan-01	EPI_ISL_194446	A/Anhui/1-YK_RG200/2013		Import from public-domain	Das,S.R.; Halpin,R.A.; Lin,X.; Simenauer,A.; Akopov,A.; Fedorova,N.; Puri,V.; Stockwell,T.; Amedeo,P.; Bishop,B.; Katzel,D.; Schobel,S.; Shrivastava,S.; Neumann,G.; Bao,Y.; Sanders,R.; Zhdanov,S.; Kiryutin,B.; Lipman,D.J.; Tatusova,T.; Kawaoka,Y.
EPI638087	PB2	China	2013-Jan-01	EPI_ISL_194445	A/Anhui/1-YK_RG199/2013		Import from public-domain	Das,S.R.; Halpin,R.A.; Lin,X.; Simenauer,A.; Akopov,A.; Fedorova,N.; Puri,V.; Stockwell,T.; Amedeo,P.; Bishop,B.; Katzel,D.; Schobel,S.; Shrivastava,S.; Neumann,G.; Bao,Y.; Sanders,R.; Zhdanov,S.; Kiryutin,B.; Lipman,D.J.; Tatusova,T.; Kawaoka,Y.
EPI638080	PB2	China	2013-Jan-01	EPI_ISL_194444	A/Anhui/1-YK_RG198/2013		Import from public-domain	Das,S.R.; Halpin,R.A.; Lin,X.; Simenauer,A.; Akopov,A.; Fedorova,N.; Puri,V.; Stockwell,T.; Amedeo,P.; Bishop,B.; Katzel,D.; Schobel,S.; Shrivastava,S.; Neumann,G.; Bao,Y.; Sanders,R.; Zhdanov,S.; Kiryutin,B.; Lipman,D.J.; Tatusova,T.; Kawaoka,Y.
EPI638073	PB2	China	2013-Jan-01	EPI_ISL_194443	A/Anhui/1-YK_RG197/2013		Import from public-domain	Das,S.R.; Halpin,R.A.; Lin,X.; Simenauer,A.; Akopov,A.; Fedorova,N.; Puri,V.; Stockwell,T.; Amedeo,P.; Bishop,B.; Katzel,D.; Schobel,S.; Shrivastava,S.; Neumann,G.; Bao,Y.; Sanders,R.; Zhdanov,S.; Kiryutin,B.; Lipman,D.J.; Tatusova,T.; Kawaoka,Y.
EPI638066	PB2	China	2013-Jan-01	EPI_ISL_194442	A/Anhui/1-YK_RG196/2013		Import from public-domain	Das,S.R.; Halpin,R.A.; Lin,X.; Simenauer,A.; Akopov,A.; Fedorova,N.; Puri,V.; Stockwell,T.; Amedeo,P.; Bishop,B.; Katzel,D.; Schobel,S.; Shrivastava,S.; Neumann,G.; Bao,Y.; Sanders,R.; Zhdanov,S.; Kiryutin,B.; Lipman,D.J.; Tatusova,T.; Kawaoka,Y.
EPI638059	PB2	China	2013-Jan-01	EPI_ISL_194441	A/Anhui/1-YK_RG195/2013		Import from public-domain	Das,S.R.; Halpin,R.A.; Lin,X.; Simenauer,A.; Akopov,A.; Fedorova,N.; Puri,V.; Stockwell,T.; Amedeo,P.; Bishop,B.; Katzel,D.; Schobel,S.; Shrivastava,S.; Neumann,G.; Bao,Y.; Sanders,R.; Zhdanov,S.; Kiryutin,B.; Lipman,D.J.; Tatusova,T.; Kawaoka,Y.
EPI638052	PB2	China	2013-Jan-01	EPI_ISL_194440	A/Anhui/1-YK_RG194/2013		Import from public-domain	Das,S.R.; Halpin,R.A.; Lin,X.; Simenauer,A.; Akopov,A.; Fedorova,N.; Puri,V.; Stockwell,T.; Amedeo,P.; Bishop,B.; Katzel,D.; Schobel,S.; Shrivastava,S.; Neumann,G.; Bao,Y.; Sanders,R.; Zhdanov,S.; Kiryutin,B.; Lipman,D.J.; Tatusova,T.; Kawaoka,Y.
EPI638045	PB2	China	2013-Jan-01	EPI_ISL_194439	A/Anhui/1-YK_RG193/2013		Import from public-domain	Das,S.R.; Halpin,R.A.; Lin,X.; Simenauer,A.; Akopov,A.; Fedorova,N.; Puri,V.; Stockwell,T.; Amedeo,P.; Bishop,B.; Katzel,D.; Schobel,S.; Shrivastava,S.; Neumann,G.; Bao,Y.; Sanders,R.; Zhdanov,S.; Kiryutin,B.; Lipman,D.J.; Tatusova,T.; Kawaoka,Y.
EPI638038	PB2	China	2013-Jan-01	EPI_ISL_194438	A/Anhui/1-YK_RG192/2013		Import from public-domain	Das,S.R.; Halpin,R.A.; Lin,X.; Simenauer,A.; Akopov,A.; Fedorova,N.; Puri,V.; Stockwell,T.; Amedeo,P.; Bishop,B.; Katzel,D.; Schobel,S.; Shrivastava,S.; Neumann,G.; Bao,Y.; Sanders,R.; Zhdanov,S.; Kiryutin,B.; Lipman,D.J.; Tatusova,T.; Kawaoka,Y.
EPI638031	PB2	China	2013-Jan-01	EPI_ISL_194437	A/Anhui/1-YK_RG191/2013		Import from public-domain	Das,S.R.; Halpin,R.A.; Lin,X.; Simenauer,A.; Akopov,A.; Fedorova,N.; Puri,V.; Stockwell,T.; Amedeo,P.; Bishop,B.; Katzel,D.; Schobel,S.; Shrivastava,S.; Neumann,G.; Bao,Y.; Sanders,R.; Zhdanov,S.; Kiryutin,B.; Lipman,D.J.; Tatusova,T.; Kawaoka,Y.
EPI638024	PB2	China	2013-Jan-01	EPI_ISL_194436	A/Anhui/1-YK_RG190/2013		Import from public-domain	Das,S.R.; Halpin,R.A.; Lin,X.; Simenauer,A.; Akopov,A.; Fedorova,N.; Puri,V.; Stockwell,T.; Amedeo,P.; Bishop,B.; Katzel,D.; Schobel,S.; Shrivastava,S.; Neumann,G.; Bao,Y.; Sanders,R.; Zhdanov,S.; Kiryutin,B.; Lipman,D.J.; Tatusova,T.; Kawaoka,Y.
EPI638017	PB2	China	2013-Jan-01	EPI_ISL_194435	A/Anhui/1-YK_RG189/2013		Import from public-domain	Das,S.R.; Halpin,R.A.; Lin,X.; Simenauer,A.; Akopov,A.; Fedorova,N.; Puri,V.; Stockwell,T.; Amedeo,P.; Bishop,B.; Katzel,D.; Schobel,S.; Shrivastava,S.; Neumann,G.; Bao,Y.; Sanders,R.; Zhdanov,S.; Kiryutin,B.; Lipman,D.J.; Tatusova,T.; Kawaoka,Y.
EPI638010	PB2	China	2013-Jan-01	EPI_ISL_194434	A/Anhui/1-YK_RG188/2013		Import from public-domain	Das,S.R.; Halpin,R.A.; Lin,X.; Simenauer,A.; Akopov,A.; Fedorova,N.; Puri,V.; Stockwell,T.; Amedeo,P.; Bishop,B.; Katzel,D.; Schobel,S.; Shrivastava,S.; Neumann,G.; Bao,Y.; Sanders,R.; Zhdanov,S.; Kiryutin,B.; Lipman,D.J.; Tatusova,T.; Kawaoka,Y.
EPI638003	PB2	China	2013-Jan-01	EPI_ISL_194433	A/Anhui/1-YK_RG187/2013		Import from public-domain	Das,S.R.; Halpin,R.A.; Lin,X.; Simenauer,A.; Akopov,A.; Fedorova,N.; Puri,V.; Stockwell,T.; Amedeo,P.; Bishop,B.; Katzel,D.; Schobel,S.; Shrivastava,S.; Neumann,G.; Bao,Y.; Sanders,R.; Zhdanov,S.; Kiryutin,B.; Lipman,D.J.; Tatusova,T.; Kawaoka,Y.
EPI637996	PB2	China	2013-Jan-01	EPI_ISL_194432	A/Anhui/1-YK_RG186/2013		Import from public-domain	Das,S.R.; Halpin,R.A.; Lin,X.; Simenauer,A.; Akopov,A.; Fedorova,N.; Puri,V.; Stockwell,T.; Amedeo,P.; Bishop,B.; Katzel,D.; Schobel,S.; Shrivastava,S.; Neumann,G.; Bao,Y.; Sanders,R.; Zhdanov,S.; Kiryutin,B.; Lipman,D.J.; Tatusova,T.; Kawaoka,Y.
EPI637989	PB2	China	2013-Jan-01	EPI_ISL_194431	A/Anhui/1-YK_RG185/2013		Import from public-domain	Das,S.R.; Halpin,R.A.; Lin,X.; Simenauer,A.; Akopov,A.; Fedorova,N.; Puri,V.; Stockwell,T.; Amedeo,P.; Bishop,B.; Katzel,D.; Schobel,S.; Shrivastava,S.; Neumann,G.; Bao,Y.; Sanders,R.; Zhdanov,S.; Kiryutin,B.; Lipman,D.J.; Tatusova,T.; Kawaoka,Y.
EPI637982	PB2	China	2013-Jan-01	EPI_ISL_194430	A/Anhui/1-YK_RG184/2013		Import from public-domain	Das,S.R.; Halpin,R.A.; Lin,X.; Simenauer,A.; Akopov,A.; Fedorova,N.; Puri,V.; Stockwell,T.; Amedeo,P.; Bishop,B.; Katzel,D.; Schobel,S.; Shrivastava,S.; Neumann,G.; Bao,Y.; Sanders,R.; Zhdanov,S.; Kiryutin,B.; Lipman,D.J.; Tatusova,T.; Kawaoka,Y.
EPI637975	PB2	China	2013-Jan-01	EPI_ISL_194429	A/Anhui/1-YK_RG183/2013		Import from public-domain	Das,S.R.; Halpin,R.A.; Lin,X.; Simenauer,A.; Akopov,A.; Fedorova,N.; Puri,V.; Stockwell,T.; Amedeo,P.; Bishop,B.; Katzel,D.; Schobel,S.; Shrivastava,S.; Neumann,G.; Bao,Y.; Sanders,R.; Zhdanov,S.; Kiryutin,B.; Lipman,D.J.; Tatusova,T.; Kawaoka,Y.
EPI637961	PB2	China	2013-Jan-01	EPI_ISL_194428	A/Anhui/1-YK_RG181/2013		Import from public-domain	Das,S.R.; Halpin,R.A.; Lin,X.; Simenauer,A.; Akopov,A.; Fedorova,N.; Puri,V.; Stockwell,T.; Amedeo,P.; Bishop,B.; Katzel,D.; Schobel,S.; Shrivastava,S.; Neumann,G.; Bao,Y.; Sanders,R.; Zhdanov,S.; Kiryutin,B.; Lipman,D.J.; Tatusova,T.; Kawaoka,Y.
EPI637702	PB2	China	2013-Jan-01	EPI_ISL_194427	A/Anhui/1-YK_RG143/2013		Import from public-domain	Das,S.R.; Halpin,R.A.; Lin,X.; Simenauer,A.; Akopov,A.; Fedorova,N.; Puri,V.; Stockwell,T.; Amedeo,P.; Bishop,B.; Katzel,D.; Schobel,S.; Shrivastava,S.; Neumann,G.; Bao,Y.; Sanders,R.; Zhdanov,S.; Kiryutin,B.; Lipman,D.J.; Tatusova,T.; Kawaoka,Y.
EPI637954	PB2	China	2013-Jan-01	EPI_ISL_194426	A/Anhui/1-YK_RG180/2013		Import from public-domain	Das,S.R.; Halpin,R.A.; Lin,X.; Simenauer,A.; Akopov,A.; Fedorova,N.; Puri,V.; Stockwell,T.; Amedeo,P.; Bishop,B.; Katzel,D.; Schobel,S.; Shrivastava,S.; Neumann,G.; Bao,Y.; Sanders,R.; Zhdanov,S.; Kiryutin,B.; Lipman,D.J.; Tatusova,T.; Kawaoka,Y.
EPI637947	PB2	China	2013-Jan-01	EPI_ISL_194425	A/Anhui/1-YK_RG179/2013		Import from public-domain	Das,S.R.; Halpin,R.A.; Lin,X.; Simenauer,A.; Akopov,A.; Fedorova,N.; Puri,V.; Stockwell,T.; Amedeo,P.; Bishop,B.; Katzel,D.; Schobel,S.; Shrivastava,S.; Neumann,G.; Bao,Y.; Sanders,R.; Zhdanov,S.; Kiryutin,B.; Lipman,D.J.; Tatusova,T.; Kawaoka,Y.
EPI637940	PB2	China	2013-Jan-01	EPI_ISL_194424	A/Anhui/1-YK_RG178/2013		Import from public-domain	Das,S.R.; Halpin,R.A.; Lin,X.; Simenauer,A.; Akopov,A.; Fedorova,N.; Puri,V.; Stockwell,T.; Amedeo,P.; Bishop,B.; Katzel,D.; Schobel,S.; Shrivastava,S.; Neumann,G.; Bao,Y.; Sanders,R.; Zhdanov,S.; Kiryutin,B.; Lipman,D.J.; Tatusova,T.; Kawaoka,Y.
EPI637933	PB2	China	2013-Jan-01	EPI_ISL_194423	A/Anhui/1-YK_RG177/2013		Import from public-domain	Das,S.R.; Halpin,R.A.; Lin,X.; Simenauer,A.; Akopov,A.; Fedorova,N.; Puri,V.; Stockwell,T.; Amedeo,P.; Bishop,B.; Katzel,D.; Schobel,S.; Shrivastava,S.; Neumann,G.; Bao,Y.; Sanders,R.; Zhdanov,S.; Kiryutin,B.; Lipman,D.J.; Tatusova,T.; Kawaoka,Y.
EPI637926	PB2	China	2013-Jan-01	EPI_ISL_194422	A/Anhui/1-YK_RG176/2013		Import from public-domain	Das,S.R.; Halpin,R.A.; Lin,X.; Simenauer,A.; Akopov,A.; Fedorova,N.; Puri,V.; Stockwell,T.; Amedeo,P.; Bishop,B.; Katzel,D.; Schobel,S.; Shrivastava,S.; Neumann,G.; Bao,Y.; Sanders,R.; Zhdanov,S.; Kiryutin,B.; Lipman,D.J.; Tatusova,T.; Kawaoka,Y.
EPI637919	PB2	China	2013-Jan-01	EPI_ISL_194421	A/Anhui/1-YK_RG174/2013		Import from public-domain	Das,S.R.; Halpin,R.A.; Lin,X.; Simenauer,A.; Akopov,A.; Fedorova,N.; Puri,V.; Stockwell,T.; Amedeo,P.; Bishop,B.; Katzel,D.; Schobel,S.; Shrivastava,S.; Neumann,G.; Bao,Y.; Sanders,R.; Zhdanov,S.; Kiryutin,B.; Lipman,D.J.; Tatusova,T.; Kawaoka,Y.
EPI637912	PB2	China	2013-Jan-01	EPI_ISL_194420	A/Anhui/1-YK_RG173/2013		Import from public-domain	Das,S.R.; Halpin,R.A.; Lin,X.; Simenauer,A.; Akopov,A.; Fedorova,N.; Puri,V.; Stockwell,T.; Amedeo,P.; Bishop,B.; Katzel,D.; Schobel,S.; Shrivastava,S.; Neumann,G.; Bao,Y.; Sanders,R.; Zhdanov,S.; Kiryutin,B.; Lipman,D.J.; Tatusova,T.; Kawaoka,Y.
EPI637905	PB2	China	2013-Jan-01	EPI_ISL_194419	A/Anhui/1-YK_RG172/2013		Import from public-domain	Das,S.R.; Halpin,R.A.; Lin,X.; Simenauer,A.; Akopov,A.; Fedorova,N.; Puri,V.; Stockwell,T.; Amedeo,P.; Bishop,B.; Katzel,D.; Schobel,S.; Shrivastava,S.; Neumann,G.; Bao,Y.; Sanders,R.; Zhdanov,S.; Kiryutin,B.; Lipman,D.J.; Tatusova,T.; Kawaoka,Y.
EPI637898	PB2	China	2013-Jan-01	EPI_ISL_194418	A/Anhui/1-YK_RG171/2013		Import from public-domain	Das,S.R.; Halpin,R.A.; Lin,X.; Simenauer,A.; Akopov,A.; Fedorova,N.; Puri,V.; Stockwell,T.; Amedeo,P.; Bishop,B.; Katzel,D.; Schobel,S.; Shrivastava,S.; Neumann,G.; Bao,Y.; Sanders,R.; Zhdanov,S.; Kiryutin,B.; Lipman,D.J.; Tatusova,T.; Kawaoka,Y.
EPI637891	PB2	China	2013-Jan-01	EPI_ISL_194417	A/Anhui/1-YK_RG170/2013		Import from public-domain	Das,S.R.; Halpin,R.A.; Lin,X.; Simenauer,A.; Akopov,A.; Fedorova,N.; Puri,V.; Stockwell,T.; Amedeo,P.; Bishop,B.; Katzel,D.; Schobel,S.; Shrivastava,S.; Neumann,G.; Bao,Y.; Sanders,R.; Zhdanov,S.; Kiryutin,B.; Lipman,D.J.; Tatusova,T.; Kawaoka,Y.
EPI637884	PB2	China	2013-Jan-01	EPI_ISL_194416	A/Anhui/1-YK_RG169/2013		Import from public-domain	Das,S.R.; Halpin,R.A.; Lin,X.; Simenauer,A.; Akopov,A.; Fedorova,N.; Puri,V.; Stockwell,T.; Amedeo,P.; Bishop,B.; Katzel,D.; Schobel,S.; Shrivastava,S.; Neumann,G.; Bao,Y.; Sanders,R.; Zhdanov,S.; Kiryutin,B.; Lipman,D.J.; Tatusova,T.; Kawaoka,Y.
EPI637877	PB2	China	2013-Jan-01	EPI_ISL_194415	A/Anhui/1-YK_RG168/2013		Import from public-domain	Das,S.R.; Halpin,R.A.; Lin,X.; Simenauer,A.; Akopov,A.; Fedorova,N.; Puri,V.; Stockwell,T.; Amedeo,P.; Bishop,B.; Katzel,D.; Schobel,S.; Shrivastava,S.; Neumann,G.; Bao,Y.; Sanders,R.; Zhdanov,S.; Kiryutin,B.; Lipman,D.J.; Tatusova,T.; Kawaoka,Y.
EPI637870	PB2	China	2013-Jan-01	EPI_ISL_194414	A/Anhui/1-YK_RG167/2013		Import from public-domain	Das,S.R.; Halpin,R.A.; Lin,X.; Simenauer,A.; Akopov,A.; Fedorova,N.; Puri,V.; Stockwell,T.; Amedeo,P.; Bishop,B.; Katzel,D.; Schobel,S.; Shrivastava,S.; Neumann,G.; Bao,Y.; Sanders,R.; Zhdanov,S.; Kiryutin,B.; Lipman,D.J.; Tatusova,T.; Kawaoka,Y.
EPI637863	PB2	China	2013-Jan-01	EPI_ISL_194413	A/Anhui/1-YK_RG166/2013		Import from public-domain	Das,S.R.; Halpin,R.A.; Lin,X.; Simenauer,A.; Akopov,A.; Fedorova,N.; Puri,V.; Stockwell,T.; Amedeo,P.; Bishop,B.; Katzel,D.; Schobel,S.; Shrivastava,S.; Neumann,G.; Bao,Y.; Sanders,R.; Zhdanov,S.; Kiryutin,B.; Lipman,D.J.; Tatusova,T.; Kawaoka,Y.
EPI637856	PB2	China	2013-Jan-01	EPI_ISL_194412	A/Anhui/1-YK_RG165/2013		Import from public-domain	Das,S.R.; Halpin,R.A.; Lin,X.; Simenauer,A.; Akopov,A.; Fedorova,N.; Puri,V.; Stockwell,T.; Amedeo,P.; Bishop,B.; Katzel,D.; Schobel,S.; Shrivastava,S.; Neumann,G.; Bao,Y.; Sanders,R.; Zhdanov,S.; Kiryutin,B.; Lipman,D.J.; Tatusova,T.; Kawaoka,Y.
EPI637849	PB2	China	2013-Jan-01	EPI_ISL_194411	A/Anhui/1-YK_RG164/2013		Import from public-domain	Das,S.R.; Halpin,R.A.; Lin,X.; Simenauer,A.; Akopov,A.; Fedorova,N.; Puri,V.; Stockwell,T.; Amedeo,P.; Bishop,B.; Katzel,D.; Schobel,S.; Shrivastava,S.; Neumann,G.; Bao,Y.; Sanders,R.; Zhdanov,S.; Kiryutin,B.; Lipman,D.J.; Tatusova,T.; Kawaoka,Y.
EPI637842	PB2	China	2013-Jan-01	EPI_ISL_194410	A/Anhui/1-YK_RG163/2013		Import from public-domain	Das,S.R.; Halpin,R.A.; Lin,X.; Simenauer,A.; Akopov,A.; Fedorova,N.; Puri,V.; Stockwell,T.; Amedeo,P.; Bishop,B.; Katzel,D.; Schobel,S.; Shrivastava,S.; Neumann,G.; Bao,Y.; Sanders,R.; Zhdanov,S.; Kiryutin,B.; Lipman,D.J.; Tatusova,T.; Kawaoka,Y.
EPI637835	PB2	China	2013-Jan-01	EPI_ISL_194409	A/Anhui/1-YK_RG162/2013		Import from public-domain	Das,S.R.; Halpin,R.A.; Lin,X.; Simenauer,A.; Akopov,A.; Fedorova,N.; Puri,V.; Stockwell,T.; Amedeo,P.; Bishop,B.; Katzel,D.; Schobel,S.; Shrivastava,S.; Neumann,G.; Bao,Y.; Sanders,R.; Zhdanov,S.; Kiryutin,B.; Lipman,D.J.; Tatusova,T.; Kawaoka,Y.
EPI637828	PB2	China	2013-Jan-01	EPI_ISL_194408	A/Anhui/1-YK_RG161/2013		Import from public-domain	Das,S.R.; Halpin,R.A.; Lin,X.; Simenauer,A.; Akopov,A.; Fedorova,N.; Puri,V.; Stockwell,T.; Amedeo,P.; Bishop,B.; Katzel,D.; Schobel,S.; Shrivastava,S.; Neumann,G.; Bao,Y.; Sanders,R.; Zhdanov,S.; Kiryutin,B.; Lipman,D.J.; Tatusova,T.; Kawaoka,Y.
EPI637821	PB2	China	2013-Jan-01	EPI_ISL_194407	A/Anhui/1-YK_RG160/2013		Import from public-domain	Das,S.R.; Halpin,R.A.; Lin,X.; Simenauer,A.; Akopov,A.; Fedorova,N.; Puri,V.; Stockwell,T.; Amedeo,P.; Bishop,B.; Katzel,D.; Schobel,S.; Shrivastava,S.; Neumann,G.; Bao,Y.; Sanders,R.; Zhdanov,S.; Kiryutin,B.; Lipman,D.J.; Tatusova,T.; Kawaoka,Y.
EPI637814	PB2	China	2013-Jan-01	EPI_ISL_194406	A/Anhui/1-YK_RG159/2013		Import from public-domain	Das,S.R.; Halpin,R.A.; Lin,X.; Simenauer,A.; Akopov,A.; Fedorova,N.; Puri,V.; Stockwell,T.; Amedeo,P.; Bishop,B.; Katzel,D.; Schobel,S.; Shrivastava,S.; Neumann,G.; Bao,Y.; Sanders,R.; Zhdanov,S.; Kiryutin,B.; Lipman,D.J.; Tatusova,T.; Kawaoka,Y.
EPI637807	PB2	China	2013-Jan-01	EPI_ISL_194405	A/Anhui/1-YK_RG158/2013		Import from public-domain	Das,S.R.; Halpin,R.A.; Lin,X.; Simenauer,A.; Akopov,A.; Fedorova,N.; Puri,V.; Stockwell,T.; Amedeo,P.; Bishop,B.; Katzel,D.; Schobel,S.; Shrivastava,S.; Neumann,G.; Bao,Y.; Sanders,R.; Zhdanov,S.; Kiryutin,B.; Lipman,D.J.; Tatusova,T.; Kawaoka,Y.
EPI637800	PB2	China	2013-Jan-01	EPI_ISL_194404	A/Anhui/1-YK_RG157/2013		Import from public-domain	Das,S.R.; Halpin,R.A.; Lin,X.; Simenauer,A.; Akopov,A.; Fedorova,N.; Puri,V.; Stockwell,T.; Amedeo,P.; Bishop,B.; Katzel,D.; Schobel,S.; Shrivastava,S.; Neumann,G.; Bao,Y.; Sanders,R.; Zhdanov,S.; Kiryutin,B.; Lipman,D.J.; Tatusova,T.; Kawaoka,Y.
EPI637793	PB2	China	2013-Jan-01	EPI_ISL_194403	A/Anhui/1-YK_RG156/2013		Import from public-domain	Das,S.R.; Halpin,R.A.; Lin,X.; Simenauer,A.; Akopov,A.; Fedorova,N.; Puri,V.; Stockwell,T.; Amedeo,P.; Bishop,B.; Katzel,D.; Schobel,S.; Shrivastava,S.; Neumann,G.; Bao,Y.; Sanders,R.; Zhdanov,S.; Kiryutin,B.; Lipman,D.J.; Tatusova,T.; Kawaoka,Y.
EPI637786	PB2	China	2013-Jan-01	EPI_ISL_194402	A/Anhui/1-YK_RG155/2013		Import from public-domain	Das,S.R.; Halpin,R.A.; Lin,X.; Simenauer,A.; Akopov,A.; Fedorova,N.; Puri,V.; Stockwell,T.; Amedeo,P.; Bishop,B.; Katzel,D.; Schobel,S.; Shrivastava,S.; Neumann,G.; Bao,Y.; Sanders,R.; Zhdanov,S.; Kiryutin,B.; Lipman,D.J.; Tatusova,T.; Kawaoka,Y.
EPI637779	PB2	China	2013-Jan-01	EPI_ISL_194401	A/Anhui/1-YK_RG154/2013		Import from public-domain	Das,S.R.; Halpin,R.A.; Lin,X.; Simenauer,A.; Akopov,A.; Fedorova,N.; Puri,V.; Stockwell,T.; Amedeo,P.; Bishop,B.; Katzel,D.; Schobel,S.; Shrivastava,S.; Neumann,G.; Bao,Y.; Sanders,R.; Zhdanov,S.; Kiryutin,B.; Lipman,D.J.; Tatusova,T.; Kawaoka,Y.
EPI637772	PB2	China	2013-Jan-01	EPI_ISL_194400	A/Anhui/1-YK_RG153/2013		Import from public-domain	Das,S.R.; Halpin,R.A.; Lin,X.; Simenauer,A.; Akopov,A.; Fedorova,N.; Puri,V.; Stockwell,T.; Amedeo,P.; Bishop,B.; Katzel,D.; Schobel,S.; Shrivastava,S.; Neumann,G.; Bao,Y.; Sanders,R.; Zhdanov,S.; Kiryutin,B.; Lipman,D.J.; Tatusova,T.; Kawaoka,Y.
EPI637765	PB2	China	2013-Jan-01	EPI_ISL_194399	A/Anhui/1-YK_RG152/2013		Import from public-domain	Das,S.R.; Halpin,R.A.; Lin,X.; Simenauer,A.; Akopov,A.; Fedorova,N.; Puri,V.; Stockwell,T.; Amedeo,P.; Bishop,B.; Katzel,D.; Schobel,S.; Shrivastava,S.; Neumann,G.; Bao,Y.; Sanders,R.; Zhdanov,S.; Kiryutin,B.; Lipman,D.J.; Tatusova,T.; Kawaoka,Y.
EPI637758	PB2	China	2013-Jan-01	EPI_ISL_194398	A/Anhui/1-YK_RG151/2013		Import from public-domain	Das,S.R.; Halpin,R.A.; Lin,X.; Simenauer,A.; Akopov,A.; Fedorova,N.; Puri,V.; Stockwell,T.; Amedeo,P.; Bishop,B.; Katzel,D.; Schobel,S.; Shrivastava,S.; Neumann,G.; Bao,Y.; Sanders,R.; Zhdanov,S.; Kiryutin,B.; Lipman,D.J.; Tatusova,T.; Kawaoka,Y.
EPI637751	PB2	China	2013-Jan-01	EPI_ISL_194397	A/Anhui/1-YK_RG150/2013		Import from public-domain	Das,S.R.; Halpin,R.A.; Lin,X.; Simenauer,A.; Akopov,A.; Fedorova,N.; Puri,V.; Stockwell,T.; Amedeo,P.; Bishop,B.; Katzel,D.; Schobel,S.; Shrivastava,S.; Neumann,G.; Bao,Y.; Sanders,R.; Zhdanov,S.; Kiryutin,B.; Lipman,D.J.; Tatusova,T.; Kawaoka,Y.
EPI637744	PB2	China	2013-Jan-01	EPI_ISL_194396	A/Anhui/1-YK_RG149/2013		Import from public-domain	Das,S.R.; Halpin,R.A.; Lin,X.; Simenauer,A.; Akopov,A.; Fedorova,N.; Puri,V.; Stockwell,T.; Amedeo,P.; Bishop,B.; Katzel,D.; Schobel,S.; Shrivastava,S.; Neumann,G.; Bao,Y.; Sanders,R.; Zhdanov,S.; Kiryutin,B.; Lipman,D.J.; Tatusova,T.; Kawaoka,Y.
EPI637737	PB2	China	2013-Jan-01	EPI_ISL_194395	A/Anhui/1-YK_RG148/2013		Import from public-domain	Das,S.R.; Halpin,R.A.; Lin,X.; Simenauer,A.; Akopov,A.; Fedorova,N.; Puri,V.; Stockwell,T.; Amedeo,P.; Bishop,B.; Katzel,D.; Schobel,S.; Shrivastava,S.; Neumann,G.; Bao,Y.; Sanders,R.; Zhdanov,S.; Kiryutin,B.; Lipman,D.J.; Tatusova,T.; Kawaoka,Y.
EPI637730	PB2	China	2013-Jan-01	EPI_ISL_194394	A/Anhui/1-YK_RG147/2013		Import from public-domain	Das,S.R.; Halpin,R.A.; Lin,X.; Simenauer,A.; Akopov,A.; Fedorova,N.; Puri,V.; Stockwell,T.; Amedeo,P.; Bishop,B.; Katzel,D.; Schobel,S.; Shrivastava,S.; Neumann,G.; Bao,Y.; Sanders,R.; Zhdanov,S.; Kiryutin,B.; Lipman,D.J.; Tatusova,T.; Kawaoka,Y.
EPI637723	PB2	China	2013-Jan-01	EPI_ISL_194393	A/Anhui/1-YK_RG146/2013		Import from public-domain	Das,S.R.; Halpin,R.A.; Lin,X.; Simenauer,A.; Akopov,A.; Fedorova,N.; Puri,V.; Stockwell,T.; Amedeo,P.; Bishop,B.; Katzel,D.; Schobel,S.; Shrivastava,S.; Neumann,G.; Bao,Y.; Sanders,R.; Zhdanov,S.; Kiryutin,B.; Lipman,D.J.; Tatusova,T.; Kawaoka,Y.
EPI637716	PB2	China	2013-Jan-01	EPI_ISL_194392	A/Anhui/1-YK_RG145/2013		Import from public-domain	Das,S.R.; Halpin,R.A.; Lin,X.; Simenauer,A.; Akopov,A.; Fedorova,N.; Puri,V.; Stockwell,T.; Amedeo,P.; Bishop,B.; Katzel,D.; Schobel,S.; Shrivastava,S.; Neumann,G.; Bao,Y.; Sanders,R.; Zhdanov,S.; Kiryutin,B.; Lipman,D.J.; Tatusova,T.; Kawaoka,Y.
EPI637709	PB2	China	2013-Jan-01	EPI_ISL_194391	A/Anhui/1-YK_RG144/2013		Import from public-domain	Das,S.R.; Halpin,R.A.; Lin,X.; Simenauer,A.; Akopov,A.; Fedorova,N.; Puri,V.; Stockwell,T.; Amedeo,P.; Bishop,B.; Katzel,D.; Schobel,S.; Shrivastava,S.; Neumann,G.; Bao,Y.; Sanders,R.; Zhdanov,S.; Kiryutin,B.; Lipman,D.J.; Tatusova,T.; Kawaoka,Y.
EPI637653	PB2	China	2013-Jan-01	EPI_ISL_194390	A/Anhui/1-YK_RG136/2013		Import from public-domain	Das,S.R.; Halpin,R.A.; Lin,X.; Simenauer,A.; Akopov,A.; Fedorova,N.; Puri,V.; Stockwell,T.; Amedeo,P.; Bishop,B.; Katzel,D.; Schobel,S.; Shrivastava,S.; Neumann,G.; Bao,Y.; Sanders,R.; Zhdanov,S.; Kiryutin,B.; Lipman,D.J.; Tatusova,T.; Kawaoka,Y.
EPI637695	PB2	China	2013-Jan-01	EPI_ISL_194389	A/Anhui/1-YK_RG142/2013		Import from public-domain	Das,S.R.; Halpin,R.A.; Lin,X.; Simenauer,A.; Akopov,A.; Fedorova,N.; Puri,V.; Stockwell,T.; Amedeo,P.; Bishop,B.; Katzel,D.; Schobel,S.; Shrivastava,S.; Neumann,G.; Bao,Y.; Sanders,R.; Zhdanov,S.; Kiryutin,B.; Lipman,D.J.; Tatusova,T.; Kawaoka,Y.
EPI637688	PB2	China	2013-Jan-01	EPI_ISL_194388	A/Anhui/1-YK_RG141/2013		Import from public-domain	Das,S.R.; Halpin,R.A.; Lin,X.; Simenauer,A.; Akopov,A.; Fedorova,N.; Puri,V.; Stockwell,T.; Amedeo,P.; Bishop,B.; Katzel,D.; Schobel,S.; Shrivastava,S.; Neumann,G.; Bao,Y.; Sanders,R.; Zhdanov,S.; Kiryutin,B.; Lipman,D.J.; Tatusova,T.; Kawaoka,Y.
EPI637681	PB2	China	2013-Jan-01	EPI_ISL_194387	A/Anhui/1-YK_RG140/2013		Import from public-domain	Das,S.R.; Halpin,R.A.; Lin,X.; Simenauer,A.; Akopov,A.; Fedorova,N.; Puri,V.; Stockwell,T.; Amedeo,P.; Bishop,B.; Katzel,D.; Schobel,S.; Shrivastava,S.; Neumann,G.; Bao,Y.; Sanders,R.; Zhdanov,S.; Kiryutin,B.; Lipman,D.J.; Tatusova,T.; Kawaoka,Y.
EPI637674	PB2	China	2013-Jan-01	EPI_ISL_194386	A/Anhui/1-YK_RG139/2013		Import from public-domain	Das,S.R.; Halpin,R.A.; Lin,X.; Simenauer,A.; Akopov,A.; Fedorova,N.; Puri,V.; Stockwell,T.; Amedeo,P.; Bishop,B.; Katzel,D.; Schobel,S.; Shrivastava,S.; Neumann,G.; Bao,Y.; Sanders,R.; Zhdanov,S.; Kiryutin,B.; Lipman,D.J.; Tatusova,T.; Kawaoka,Y.
EPI637667	PB2	China	2013-Jan-01	EPI_ISL_194385	A/Anhui/1-YK_RG138/2013		Import from public-domain	Das,S.R.; Halpin,R.A.; Lin,X.; Simenauer,A.; Akopov,A.; Fedorova,N.; Puri,V.; Stockwell,T.; Amedeo,P.; Bishop,B.; Katzel,D.; Schobel,S.; Shrivastava,S.; Neumann,G.; Bao,Y.; Sanders,R.; Zhdanov,S.; Kiryutin,B.; Lipman,D.J.; Tatusova,T.; Kawaoka,Y.
EPI637660	PB2	China	2013-Jan-01	EPI_ISL_194384	A/Anhui/1-YK_RG137/2013		Import from public-domain	Das,S.R.; Halpin,R.A.; Lin,X.; Simenauer,A.; Akopov,A.; Fedorova,N.; Puri,V.; Stockwell,T.; Amedeo,P.; Bishop,B.; Katzel,D.; Schobel,S.; Shrivastava,S.; Neumann,G.; Bao,Y.; Sanders,R.; Zhdanov,S.; Kiryutin,B.; Lipman,D.J.; Tatusova,T.; Kawaoka,Y.
EPI637639	PB2	China	2013-Jan-01	EPI_ISL_194383	A/Anhui/1-YK_RG134/2013		Import from public-domain	Das,S.R.; Halpin,R.A.; Lin,X.; Simenauer,A.; Akopov,A.; Fedorova,N.; Puri,V.; Stockwell,T.; Amedeo,P.; Bishop,B.; Katzel,D.; Schobel,S.; Shrivastava,S.; Neumann,G.; Bao,Y.; Sanders,R.; Zhdanov,S.; Kiryutin,B.; Lipman,D.J.; Tatusova,T.; Kawaoka,Y.
EPI637646	PB2	China	2013-Jan-01	EPI_ISL_194382	A/Anhui/1-YK_RG135/2013		Import from public-domain	Das,S.R.; Halpin,R.A.; Lin,X.; Simenauer,A.; Akopov,A.; Fedorova,N.; Puri,V.; Stockwell,T.; Amedeo,P.; Bishop,B.; Katzel,D.; Schobel,S.; Shrivastava,S.; Neumann,G.; Bao,Y.; Sanders,R.; Zhdanov,S.; Kiryutin,B.; Lipman,D.J.; Tatusova,T.; Kawaoka,Y.
EPI637583	PB2	China	2013-Jan-01	EPI_ISL_194381	A/Anhui/1-YK_RG126/2013		Import from public-domain	Das,S.R.; Halpin,R.A.; Lin,X.; Simenauer,A.; Akopov,A.; Fedorova,N.; Puri,V.; Stockwell,T.; Amedeo,P.; Bishop,B.; Katzel,D.; Schobel,S.; Shrivastava,S.; Neumann,G.; Bao,Y.; Sanders,R.; Zhdanov,S.; Kiryutin,B.; Lipman,D.J.; Tatusova,T.; Kawaoka,Y.
EPI637632	PB2	China	2013-Jan-01	EPI_ISL_194380	A/Anhui/1-YK_RG133/2013		Import from public-domain	Das,S.R.; Halpin,R.A.; Lin,X.; Simenauer,A.; Akopov,A.; Fedorova,N.; Puri,V.; Stockwell,T.; Amedeo,P.; Bishop,B.; Katzel,D.; Schobel,S.; Shrivastava,S.; Neumann,G.; Bao,Y.; Sanders,R.; Zhdanov,S.; Kiryutin,B.; Lipman,D.J.; Tatusova,T.; Kawaoka,Y.
EPI637625	PB2	China	2013-Jan-01	EPI_ISL_194379	A/Anhui/1-YK_RG132/2013		Import from public-domain	Das,S.R.; Halpin,R.A.; Lin,X.; Simenauer,A.; Akopov,A.; Fedorova,N.; Puri,V.; Stockwell,T.; Amedeo,P.; Bishop,B.; Katzel,D.; Schobel,S.; Shrivastava,S.; Neumann,G.; Bao,Y.; Sanders,R.; Zhdanov,S.; Kiryutin,B.; Lipman,D.J.; Tatusova,T.; Kawaoka,Y.
EPI637618	PB2	China	2013-Jan-01	EPI_ISL_194378	A/Anhui/1-YK_RG131/2013		Import from public-domain	Das,S.R.; Halpin,R.A.; Lin,X.; Simenauer,A.; Akopov,A.; Fedorova,N.; Puri,V.; Stockwell,T.; Amedeo,P.; Bishop,B.; Katzel,D.; Schobel,S.; Shrivastava,S.; Neumann,G.; Bao,Y.; Sanders,R.; Zhdanov,S.; Kiryutin,B.; Lipman,D.J.; Tatusova,T.; Kawaoka,Y.
EPI637611	PB2	China	2013-Jan-01	EPI_ISL_194377	A/Anhui/1-YK_RG130/2013		Import from public-domain	Das,S.R.; Halpin,R.A.; Lin,X.; Simenauer,A.; Akopov,A.; Fedorova,N.; Puri,V.; Stockwell,T.; Amedeo,P.; Bishop,B.; Katzel,D.; Schobel,S.; Shrivastava,S.; Neumann,G.; Bao,Y.; Sanders,R.; Zhdanov,S.; Kiryutin,B.; Lipman,D.J.; Tatusova,T.; Kawaoka,Y.
EPI637604	PB2	China	2013-Jan-01	EPI_ISL_194376	A/Anhui/1-YK_RG129/2013		Import from public-domain	Das,S.R.; Halpin,R.A.; Lin,X.; Simenauer,A.; Akopov,A.; Fedorova,N.; Puri,V.; Stockwell,T.; Amedeo,P.; Bishop,B.; Katzel,D.; Schobel,S.; Shrivastava,S.; Neumann,G.; Bao,Y.; Sanders,R.; Zhdanov,S.; Kiryutin,B.; Lipman,D.J.; Tatusova,T.; Kawaoka,Y.
EPI637597	PB2	China	2013-Jan-01	EPI_ISL_194375	A/Anhui/1-YK_RG128/2013		Import from public-domain	Das,S.R.; Halpin,R.A.; Lin,X.; Simenauer,A.; Akopov,A.; Fedorova,N.; Puri,V.; Stockwell,T.; Amedeo,P.; Bishop,B.; Katzel,D.; Schobel,S.; Shrivastava,S.; Neumann,G.; Bao,Y.; Sanders,R.; Zhdanov,S.; Kiryutin,B.; Lipman,D.J.; Tatusova,T.; Kawaoka,Y.
EPI637590	PB2	China	2013-Jan-01	EPI_ISL_194374	A/Anhui/1-YK_RG127/2013		Import from public-domain	Das,S.R.; Halpin,R.A.; Lin,X.; Simenauer,A.; Akopov,A.; Fedorova,N.; Puri,V.; Stockwell,T.; Amedeo,P.; Bishop,B.; Katzel,D.; Schobel,S.; Shrivastava,S.; Neumann,G.; Bao,Y.; Sanders,R.; Zhdanov,S.; Kiryutin,B.; Lipman,D.J.; Tatusova,T.; Kawaoka,Y.
EPI637576	PB2	China	2013-Jan-01	EPI_ISL_194373	A/Anhui/1-YK_RG125/2013		Import from public-domain	Das,S.R.; Halpin,R.A.; Lin,X.; Simenauer,A.; Akopov,A.; Fedorova,N.; Puri,V.; Stockwell,T.; Amedeo,P.; Bishop,B.; Katzel,D.; Schobel,S.; Shrivastava,S.; Neumann,G.; Bao,Y.; Sanders,R.; Zhdanov,S.; Kiryutin,B.; Lipman,D.J.; Tatusova,T.; Kawaoka,Y.
EPI637431	PB2	China	2013-Jan-01	EPI_ISL_194372	A/Anhui/1-YK_RG105/2013		Import from public-domain	Das,S.R.; Halpin,R.A.; Lin,X.; Simenauer,A.; Akopov,A.; Fedorova,N.; Puri,V.; Stockwell,T.; Amedeo,P.; Bishop,B.; Katzel,D.; Schobel,S.; Shrivastava,S.; Neumann,G.; Bao,Y.; Sanders,R.; Zhdanov,S.; Kiryutin,B.; Lipman,D.J.; Tatusova,T.; Kawaoka,Y.
EPI637569	PB2	China	2013-Jan-01	EPI_ISL_194371	A/Anhui/1-YK_RG124/2013		Import from public-domain	Das,S.R.; Halpin,R.A.; Lin,X.; Simenauer,A.; Akopov,A.; Fedorova,N.; Puri,V.; Stockwell,T.; Amedeo,P.; Bishop,B.; Katzel,D.; Schobel,S.; Shrivastava,S.; Neumann,G.; Bao,Y.; Sanders,R.; Zhdanov,S.; Kiryutin,B.; Lipman,D.J.; Tatusova,T.; Kawaoka,Y.
EPI637562	PB2	China	2013-Jan-01	EPI_ISL_194370	A/Anhui/1-YK_RG123/2013		Import from public-domain	Das,S.R.; Halpin,R.A.; Lin,X.; Simenauer,A.; Akopov,A.; Fedorova,N.; Puri,V.; Stockwell,T.; Amedeo,P.; Bishop,B.; Katzel,D.; Schobel,S.; Shrivastava,S.; Neumann,G.; Bao,Y.; Sanders,R.; Zhdanov,S.; Kiryutin,B.; Lipman,D.J.; Tatusova,T.; Kawaoka,Y.
EPI637555	PB2	China	2013-Jan-01	EPI_ISL_194369	A/Anhui/1-YK_RG122/2013		Import from public-domain	Das,S.R.; Halpin,R.A.; Lin,X.; Simenauer,A.; Akopov,A.; Fedorova,N.; Puri,V.; Stockwell,T.; Amedeo,P.; Bishop,B.; Katzel,D.; Schobel,S.; Shrivastava,S.; Neumann,G.; Bao,Y.; Sanders,R.; Zhdanov,S.; Kiryutin,B.; Lipman,D.J.; Tatusova,T.; Kawaoka,Y.
EPI637548	PB2	China	2013-Jan-01	EPI_ISL_194368	A/Anhui/1-YK_RG121/2013		Import from public-domain	Das,S.R.; Halpin,R.A.; Lin,X.; Simenauer,A.; Akopov,A.; Fedorova,N.; Puri,V.; Stockwell,T.; Amedeo,P.; Bishop,B.; Katzel,D.; Schobel,S.; Shrivastava,S.; Neumann,G.; Bao,Y.; Sanders,R.; Zhdanov,S.; Kiryutin,B.; Lipman,D.J.; Tatusova,T.; Kawaoka,Y.
EPI637541	PB2	China	2013-Jan-01	EPI_ISL_194367	A/Anhui/1-YK_RG120/2013		Import from public-domain	Das,S.R.; Halpin,R.A.; Lin,X.; Simenauer,A.; Akopov,A.; Fedorova,N.; Puri,V.; Stockwell,T.; Amedeo,P.; Bishop,B.; Katzel,D.; Schobel,S.; Shrivastava,S.; Neumann,G.; Bao,Y.; Sanders,R.; Zhdanov,S.; Kiryutin,B.; Lipman,D.J.; Tatusova,T.; Kawaoka,Y.
EPI637534	PB2	China	2013-Jan-01	EPI_ISL_194366	A/Anhui/1-YK_RG119/2013		Import from public-domain	Das,S.R.; Halpin,R.A.; Lin,X.; Simenauer,A.; Akopov,A.; Fedorova,N.; Puri,V.; Stockwell,T.; Amedeo,P.; Bishop,B.; Katzel,D.; Schobel,S.; Shrivastava,S.; Neumann,G.; Bao,Y.; Sanders,R.; Zhdanov,S.; Kiryutin,B.; Lipman,D.J.; Tatusova,T.; Kawaoka,Y.
EPI637527	PB2	China	2013-Jan-01	EPI_ISL_194365	A/Anhui/1-YK_RG118/2013		Import from public-domain	Das,S.R.; Halpin,R.A.; Lin,X.; Simenauer,A.; Akopov,A.; Fedorova,N.; Puri,V.; Stockwell,T.; Amedeo,P.; Bishop,B.; Katzel,D.; Schobel,S.; Shrivastava,S.; Neumann,G.; Bao,Y.; Sanders,R.; Zhdanov,S.; Kiryutin,B.; Lipman,D.J.; Tatusova,T.; Kawaoka,Y.
EPI637520	PB2	China	2013-Jan-01	EPI_ISL_194364	A/Anhui/1-YK_RG117/2013		Import from public-domain	Das,S.R.; Halpin,R.A.; Lin,X.; Simenauer,A.; Akopov,A.; Fedorova,N.; Puri,V.; Stockwell,T.; Amedeo,P.; Bishop,B.; Katzel,D.; Schobel,S.; Shrivastava,S.; Neumann,G.; Bao,Y.; Sanders,R.; Zhdanov,S.; Kiryutin,B.; Lipman,D.J.; Tatusova,T.; Kawaoka,Y.
EPI637513	PB2	China	2013-Jan-01	EPI_ISL_194363	A/Anhui/1-YK_RG116/2013		Import from public-domain	Das,S.R.; Halpin,R.A.; Lin,X.; Simenauer,A.; Akopov,A.; Fedorova,N.; Puri,V.; Stockwell,T.; Amedeo,P.; Bishop,B.; Katzel,D.; Schobel,S.; Shrivastava,S.; Neumann,G.; Bao,Y.; Sanders,R.; Zhdanov,S.; Kiryutin,B.; Lipman,D.J.; Tatusova,T.; Kawaoka,Y.
EPI637506	PB2	China	2013-Jan-01	EPI_ISL_194362	A/Anhui/1-YK_RG115/2013		Import from public-domain	Das,S.R.; Halpin,R.A.; Lin,X.; Simenauer,A.; Akopov,A.; Fedorova,N.; Puri,V.; Stockwell,T.; Amedeo,P.; Bishop,B.; Katzel,D.; Schobel,S.; Shrivastava,S.; Neumann,G.; Bao,Y.; Sanders,R.; Zhdanov,S.; Kiryutin,B.; Lipman,D.J.; Tatusova,T.; Kawaoka,Y.
EPI637499	PB2	China	2013-Jan-01	EPI_ISL_194361	A/Anhui/1-YK_RG114/2013		Import from public-domain	Das,S.R.; Halpin,R.A.; Lin,X.; Simenauer,A.; Akopov,A.; Fedorova,N.; Puri,V.; Stockwell,T.; Amedeo,P.; Bishop,B.; Katzel,D.; Schobel,S.; Shrivastava,S.; Neumann,G.; Bao,Y.; Sanders,R.; Zhdanov,S.; Kiryutin,B.; Lipman,D.J.; Tatusova,T.; Kawaoka,Y.
EPI637492	PB2	China	2013-Jan-01	EPI_ISL_194360	A/Anhui/1-YK_RG113/2013		Import from public-domain	Das,S.R.; Halpin,R.A.; Lin,X.; Simenauer,A.; Akopov,A.; Fedorova,N.; Puri,V.; Stockwell,T.; Amedeo,P.; Bishop,B.; Katzel,D.; Schobel,S.; Shrivastava,S.; Neumann,G.; Bao,Y.; Sanders,R.; Zhdanov,S.; Kiryutin,B.; Lipman,D.J.; Tatusova,T.; Kawaoka,Y.
EPI637480	PB2	China	2013-Jan-01	EPI_ISL_194359	A/Anhui/1-YK_RG112/2013		Import from public-domain	Das,S.R.; Halpin,R.A.; Lin,X.; Simenauer,A.; Akopov,A.; Fedorova,N.; Puri,V.; Stockwell,T.; Amedeo,P.; Bishop,B.; Katzel,D.; Schobel,S.; Shrivastava,S.; Neumann,G.; Bao,Y.; Sanders,R.; Zhdanov,S.; Kiryutin,B.; Lipman,D.J.; Tatusova,T.; Kawaoka,Y.
EPI637473	PB2	China	2013-Jan-01	EPI_ISL_194358	A/Anhui/1-YK_RG111/2013		Import from public-domain	Das,S.R.; Halpin,R.A.; Lin,X.; Simenauer,A.; Akopov,A.; Fedorova,N.; Puri,V.; Stockwell,T.; Amedeo,P.; Bishop,B.; Katzel,D.; Schobel,S.; Shrivastava,S.; Neumann,G.; Bao,Y.; Sanders,R.; Zhdanov,S.; Kiryutin,B.; Lipman,D.J.; Tatusova,T.; Kawaoka,Y.
EPI637466	PB2	China	2013-Jan-01	EPI_ISL_194357	A/Anhui/1-YK_RG110/2013		Import from public-domain	Das,S.R.; Halpin,R.A.; Lin,X.; Simenauer,A.; Akopov,A.; Fedorova,N.; Puri,V.; Stockwell,T.; Amedeo,P.; Bishop,B.; Katzel,D.; Schobel,S.; Shrivastava,S.; Neumann,G.; Bao,Y.; Sanders,R.; Zhdanov,S.; Kiryutin,B.; Lipman,D.J.; Tatusova,T.; Kawaoka,Y.
EPI637459	PB2	China	2013-Jan-01	EPI_ISL_194356	A/Anhui/1-YK_RG109/2013		Import from public-domain	Das,S.R.; Halpin,R.A.; Lin,X.; Simenauer,A.; Akopov,A.; Fedorova,N.; Puri,V.; Stockwell,T.; Amedeo,P.; Bishop,B.; Katzel,D.; Schobel,S.; Shrivastava,S.; Neumann,G.; Bao,Y.; Sanders,R.; Zhdanov,S.; Kiryutin,B.; Lipman,D.J.; Tatusova,T.; Kawaoka,Y.
EPI637452	PB2	China	2013-Jan-01	EPI_ISL_194355	A/Anhui/1-YK_RG108/2013		Import from public-domain	Das,S.R.; Halpin,R.A.; Lin,X.; Simenauer,A.; Akopov,A.; Fedorova,N.; Puri,V.; Stockwell,T.; Amedeo,P.; Bishop,B.; Katzel,D.; Schobel,S.; Shrivastava,S.; Neumann,G.; Bao,Y.; Sanders,R.; Zhdanov,S.; Kiryutin,B.; Lipman,D.J.; Tatusova,T.; Kawaoka,Y.
EPI637445	PB2	China	2013-Jan-01	EPI_ISL_194354	A/Anhui/1-YK_RG107/2013		Import from public-domain	Das,S.R.; Halpin,R.A.; Lin,X.; Simenauer,A.; Akopov,A.; Fedorova,N.; Puri,V.; Stockwell,T.; Amedeo,P.; Bishop,B.; Katzel,D.; Schobel,S.; Shrivastava,S.; Neumann,G.; Bao,Y.; Sanders,R.; Zhdanov,S.; Kiryutin,B.; Lipman,D.J.; Tatusova,T.; Kawaoka,Y.
EPI637438	PB2	China	2013-Jan-01	EPI_ISL_194353	A/Anhui/1-YK_RG106/2013		Import from public-domain	Das,S.R.; Halpin,R.A.; Lin,X.; Simenauer,A.; Akopov,A.; Fedorova,N.; Puri,V.; Stockwell,T.; Amedeo,P.; Bishop,B.; Katzel,D.; Schobel,S.; Shrivastava,S.; Neumann,G.; Bao,Y.; Sanders,R.; Zhdanov,S.; Kiryutin,B.; Lipman,D.J.; Tatusova,T.; Kawaoka,Y.
EPI637223	PB2	China	2013-Jan-01	EPI_ISL_194352	A/Anhui/1-YK_RG76/2013		Import from public-domain	Das,S.R.; Halpin,R.A.; Lin,X.; Simenauer,A.; Akopov,A.; Fedorova,N.; Puri,V.; Stockwell,T.; Amedeo,P.; Bishop,B.; Katzel,D.; Schobel,S.; Shrivastava,S.; Neumann,G.; Bao,Y.; Sanders,R.; Zhdanov,S.; Kiryutin,B.; Lipman,D.J.; Tatusova,T.; Kawaoka,Y.
EPI637424	PB2	China	2013-Jan-01	EPI_ISL_194351	A/Anhui/1-YK_RG104/2013		Import from public-domain	Das,S.R.; Halpin,R.A.; Lin,X.; Simenauer,A.; Akopov,A.; Fedorova,N.; Puri,V.; Stockwell,T.; Amedeo,P.; Bishop,B.; Katzel,D.; Schobel,S.; Shrivastava,S.; Neumann,G.; Bao,Y.; Sanders,R.; Zhdanov,S.; Kiryutin,B.; Lipman,D.J.; Tatusova,T.; Kawaoka,Y.
EPI637417	PB2	China	2013-Jan-01	EPI_ISL_194350	A/Anhui/1-YK_RG103/2013		Import from public-domain	Das,S.R.; Halpin,R.A.; Lin,X.; Simenauer,A.; Akopov,A.; Fedorova,N.; Puri,V.; Stockwell,T.; Amedeo,P.; Bishop,B.; Katzel,D.; Schobel,S.; Shrivastava,S.; Neumann,G.; Bao,Y.; Sanders,R.; Zhdanov,S.; Kiryutin,B.; Lipman,D.J.; Tatusova,T.; Kawaoka,Y.
EPI637410	PB2	China	2013-Jan-01	EPI_ISL_194349	A/Anhui/1-YK_RG102/2013		Import from public-domain	Das,S.R.; Halpin,R.A.; Lin,X.; Simenauer,A.; Akopov,A.; Fedorova,N.; Puri,V.; Stockwell,T.; Amedeo,P.; Bishop,B.; Katzel,D.; Schobel,S.; Shrivastava,S.; Neumann,G.; Bao,Y.; Sanders,R.; Zhdanov,S.; Kiryutin,B.; Lipman,D.J.; Tatusova,T.; Kawaoka,Y.
EPI637403	PB2	China	2013-Jan-01	EPI_ISL_194348	A/Anhui/1-YK_RG101/2013		Import from public-domain	Das,S.R.; Halpin,R.A.; Lin,X.; Simenauer,A.; Akopov,A.; Fedorova,N.; Puri,V.; Stockwell,T.; Amedeo,P.; Bishop,B.; Katzel,D.; Schobel,S.; Shrivastava,S.; Neumann,G.; Bao,Y.; Sanders,R.; Zhdanov,S.; Kiryutin,B.; Lipman,D.J.; Tatusova,T.; Kawaoka,Y.
EPI637396	PB2	China	2013-Jan-01	EPI_ISL_194347	A/Anhui/1-YK_RG100/2013		Import from public-domain	Das,S.R.; Halpin,R.A.; Lin,X.; Simenauer,A.; Akopov,A.; Fedorova,N.; Puri,V.; Stockwell,T.; Amedeo,P.; Bishop,B.; Katzel,D.; Schobel,S.; Shrivastava,S.; Neumann,G.; Bao,Y.; Sanders,R.; Zhdanov,S.; Kiryutin,B.; Lipman,D.J.; Tatusova,T.; Kawaoka,Y.
EPI637389	PB2	China	2013-Jan-01	EPI_ISL_194346	A/Anhui/1-YK_RG99/2013		Import from public-domain	Das,S.R.; Halpin,R.A.; Lin,X.; Simenauer,A.; Akopov,A.; Fedorova,N.; Puri,V.; Stockwell,T.; Amedeo,P.; Bishop,B.; Katzel,D.; Schobel,S.; Shrivastava,S.; Neumann,G.; Bao,Y.; Sanders,R.; Zhdanov,S.; Kiryutin,B.; Lipman,D.J.; Tatusova,T.; Kawaoka,Y.
EPI637382	PB2	China	2013-Jan-01	EPI_ISL_194345	A/Anhui/1-YK_RG98/2013		Import from public-domain	Das,S.R.; Halpin,R.A.; Lin,X.; Simenauer,A.; Akopov,A.; Fedorova,N.; Puri,V.; Stockwell,T.; Amedeo,P.; Bishop,B.; Katzel,D.; Schobel,S.; Shrivastava,S.; Neumann,G.; Bao,Y.; Sanders,R.; Zhdanov,S.; Kiryutin,B.; Lipman,D.J.; Tatusova,T.; Kawaoka,Y.
EPI637375	PB2	China	2013-Jan-01	EPI_ISL_194344	A/Anhui/1-YK_RG97/2013		Import from public-domain	Das,S.R.; Halpin,R.A.; Lin,X.; Simenauer,A.; Akopov,A.; Fedorova,N.; Puri,V.; Stockwell,T.; Amedeo,P.; Bishop,B.; Katzel,D.; Schobel,S.; Shrivastava,S.; Neumann,G.; Bao,Y.; Sanders,R.; Zhdanov,S.; Kiryutin,B.; Lipman,D.J.; Tatusova,T.; Kawaoka,Y.
EPI637368	PB2	China	2013-Jan-01	EPI_ISL_194343	A/Anhui/1-YK_RG96/2013		Import from public-domain	Das,S.R.; Halpin,R.A.; Lin,X.; Simenauer,A.; Akopov,A.; Fedorova,N.; Puri,V.; Stockwell,T.; Amedeo,P.; Bishop,B.; Katzel,D.; Schobel,S.; Shrivastava,S.; Neumann,G.; Bao,Y.; Sanders,R.; Zhdanov,S.; Kiryutin,B.; Lipman,D.J.; Tatusova,T.; Kawaoka,Y.
EPI637361	PB2	China	2013-Jan-01	EPI_ISL_194342	A/Anhui/1-YK_RG95/2013		Import from public-domain	Das,S.R.; Halpin,R.A.; Lin,X.; Simenauer,A.; Akopov,A.; Fedorova,N.; Puri,V.; Stockwell,T.; Amedeo,P.; Bishop,B.; Katzel,D.; Schobel,S.; Shrivastava,S.; Neumann,G.; Bao,Y.; Sanders,R.; Zhdanov,S.; Kiryutin,B.; Lipman,D.J.; Tatusova,T.; Kawaoka,Y.
EPI637354	PB2	China	2013-Jan-01	EPI_ISL_194341	A/Anhui/1-YK_RG94/2013		Import from public-domain	Das,S.R.; Halpin,R.A.; Lin,X.; Simenauer,A.; Akopov,A.; Fedorova,N.; Puri,V.; Stockwell,T.; Amedeo,P.; Bishop,B.; Katzel,D.; Schobel,S.; Shrivastava,S.; Neumann,G.; Bao,Y.; Sanders,R.; Zhdanov,S.; Kiryutin,B.; Lipman,D.J.; Tatusova,T.; Kawaoka,Y.
EPI637346	PB2	China	2013-Jan-01	EPI_ISL_194340	A/Anhui/1-YK_RG93/2013		Import from public-domain	Das,S.R.; Halpin,R.A.; Lin,X.; Simenauer,A.; Akopov,A.; Fedorova,N.; Puri,V.; Stockwell,T.; Amedeo,P.; Bishop,B.; Katzel,D.; Schobel,S.; Shrivastava,S.; Neumann,G.; Bao,Y.; Sanders,R.; Zhdanov,S.; Kiryutin,B.; Lipman,D.J.; Tatusova,T.; Kawaoka,Y.
EPI637339	PB2	China	2013-Jan-01	EPI_ISL_194339	A/Anhui/1-YK_RG92/2013		Import from public-domain	Das,S.R.; Halpin,R.A.; Lin,X.; Simenauer,A.; Akopov,A.; Fedorova,N.; Puri,V.; Stockwell,T.; Amedeo,P.; Bishop,B.; Katzel,D.; Schobel,S.; Shrivastava,S.; Neumann,G.; Bao,Y.; Sanders,R.; Zhdanov,S.; Kiryutin,B.; Lipman,D.J.; Tatusova,T.; Kawaoka,Y.
EPI637332	PB2	China	2013-Jan-01	EPI_ISL_194338	A/Anhui/1-YK_RG91/2013		Import from public-domain	Das,S.R.; Halpin,R.A.; Lin,X.; Simenauer,A.; Akopov,A.; Fedorova,N.; Puri,V.; Stockwell,T.; Amedeo,P.; Bishop,B.; Katzel,D.; Schobel,S.; Shrivastava,S.; Neumann,G.; Bao,Y.; Sanders,R.; Zhdanov,S.; Kiryutin,B.; Lipman,D.J.; Tatusova,T.; Kawaoka,Y.
EPI637325	PB2	China	2013-Jan-01	EPI_ISL_194337	A/Anhui/1-YK_RG90/2013		Import from public-domain	Das,S.R.; Halpin,R.A.; Lin,X.; Simenauer,A.; Akopov,A.; Fedorova,N.; Puri,V.; Stockwell,T.; Amedeo,P.; Bishop,B.; Katzel,D.; Schobel,S.; Shrivastava,S.; Neumann,G.; Bao,Y.; Sanders,R.; Zhdanov,S.; Kiryutin,B.; Lipman,D.J.; Tatusova,T.; Kawaoka,Y.
EPI637318	PB2	China	2013-Jan-01	EPI_ISL_194336	A/Anhui/1-YK_RG89/2013		Import from public-domain	Das,S.R.; Halpin,R.A.; Lin,X.; Simenauer,A.; Akopov,A.; Fedorova,N.; Puri,V.; Stockwell,T.; Amedeo,P.; Bishop,B.; Katzel,D.; Schobel,S.; Shrivastava,S.; Neumann,G.; Bao,Y.; Sanders,R.; Zhdanov,S.; Kiryutin,B.; Lipman,D.J.; Tatusova,T.; Kawaoka,Y.
EPI637311	PB2	China	2013-Jan-01	EPI_ISL_194335	A/Anhui/1-YK_RG88/2013		Import from public-domain	Das,S.R.; Halpin,R.A.; Lin,X.; Simenauer,A.; Akopov,A.; Fedorova,N.; Puri,V.; Stockwell,T.; Amedeo,P.; Bishop,B.; Katzel,D.; Schobel,S.; Shrivastava,S.; Neumann,G.; Bao,Y.; Sanders,R.; Zhdanov,S.; Kiryutin,B.; Lipman,D.J.; Tatusova,T.; Kawaoka,Y.
EPI637304	PB2	China	2013-Jan-01	EPI_ISL_194334	A/Anhui/1-YK_RG87/2013		Import from public-domain	Das,S.R.; Halpin,R.A.; Lin,X.; Simenauer,A.; Akopov,A.; Fedorova,N.; Puri,V.; Stockwell,T.; Amedeo,P.; Bishop,B.; Katzel,D.; Schobel,S.; Shrivastava,S.; Neumann,G.; Bao,Y.; Sanders,R.; Zhdanov,S.; Kiryutin,B.; Lipman,D.J.; Tatusova,T.; Kawaoka,Y.
EPI637296	PB2	China	2013-Jan-01	EPI_ISL_194333	A/Anhui/1-YK_RG86/2013		Import from public-domain	Das,S.R.; Halpin,R.A.; Lin,X.; Simenauer,A.; Akopov,A.; Fedorova,N.; Puri,V.; Stockwell,T.; Amedeo,P.; Bishop,B.; Katzel,D.; Schobel,S.; Shrivastava,S.; Neumann,G.; Bao,Y.; Sanders,R.; Zhdanov,S.; Kiryutin,B.; Lipman,D.J.; Tatusova,T.; Kawaoka,Y.
EPI637289	PB2	China	2013-Jan-01	EPI_ISL_194332	A/Anhui/1-YK_RG85/2013		Import from public-domain	Das,S.R.; Halpin,R.A.; Lin,X.; Simenauer,A.; Akopov,A.; Fedorova,N.; Puri,V.; Stockwell,T.; Amedeo,P.; Bishop,B.; Katzel,D.; Schobel,S.; Shrivastava,S.; Neumann,G.; Bao,Y.; Sanders,R.; Zhdanov,S.; Kiryutin,B.; Lipman,D.J.; Tatusova,T.; Kawaoka,Y.
EPI637281	PB2	China	2013-Jan-01	EPI_ISL_194331	A/Anhui/1-YK_RG84/2013		Import from public-domain	Das,S.R.; Halpin,R.A.; Lin,X.; Simenauer,A.; Akopov,A.; Fedorova,N.; Puri,V.; Stockwell,T.; Amedeo,P.; Bishop,B.; Katzel,D.; Schobel,S.; Shrivastava,S.; Neumann,G.; Bao,Y.; Sanders,R.; Zhdanov,S.; Kiryutin,B.; Lipman,D.J.; Tatusova,T.; Kawaoka,Y.
EPI637274	PB2	China	2013-Jan-01	EPI_ISL_194330	A/Anhui/1-YK_RG83/2013		Import from public-domain	Das,S.R.; Halpin,R.A.; Lin,X.; Simenauer,A.; Akopov,A.; Fedorova,N.; Puri,V.; Stockwell,T.; Amedeo,P.; Bishop,B.; Katzel,D.; Schobel,S.; Shrivastava,S.; Neumann,G.; Bao,Y.; Sanders,R.; Zhdanov,S.; Kiryutin,B.; Lipman,D.J.; Tatusova,T.; Kawaoka,Y.
EPI637267	PB2	China	2013-Jan-01	EPI_ISL_194329	A/Anhui/1-YK_RG82/2013		Import from public-domain	Das,S.R.; Halpin,R.A.; Lin,X.; Simenauer,A.; Akopov,A.; Fedorova,N.; Puri,V.; Stockwell,T.; Amedeo,P.; Bishop,B.; Katzel,D.; Schobel,S.; Shrivastava,S.; Neumann,G.; Bao,Y.; Sanders,R.; Zhdanov,S.; Kiryutin,B.; Lipman,D.J.; Tatusova,T.; Kawaoka,Y.
EPI637258	PB2	China	2013-Jan-01	EPI_ISL_194328	A/Anhui/1-YK_RG81/2013		Import from public-domain	Das,S.R.; Halpin,R.A.; Lin,X.; Simenauer,A.; Akopov,A.; Fedorova,N.; Puri,V.; Stockwell,T.; Amedeo,P.; Bishop,B.; Katzel,D.; Schobel,S.; Shrivastava,S.; Neumann,G.; Bao,Y.; Sanders,R.; Zhdanov,S.; Kiryutin,B.; Lipman,D.J.; Tatusova,T.; Kawaoka,Y.
EPI637251	PB2	China	2013-Jan-01	EPI_ISL_194327	A/Anhui/1-YK_RG80/2013		Import from public-domain	Das,S.R.; Halpin,R.A.; Lin,X.; Simenauer,A.; Akopov,A.; Fedorova,N.; Puri,V.; Stockwell,T.; Amedeo,P.; Bishop,B.; Katzel,D.; Schobel,S.; Shrivastava,S.; Neumann,G.; Bao,Y.; Sanders,R.; Zhdanov,S.; Kiryutin,B.; Lipman,D.J.; Tatusova,T.; Kawaoka,Y.
EPI637244	PB2	China	2013-Jan-01	EPI_ISL_194326	A/Anhui/1-YK_RG79/2013		Import from public-domain	Das,S.R.; Halpin,R.A.; Lin,X.; Simenauer,A.; Akopov,A.; Fedorova,N.; Puri,V.; Stockwell,T.; Amedeo,P.; Bishop,B.; Katzel,D.; Schobel,S.; Shrivastava,S.; Neumann,G.; Bao,Y.; Sanders,R.; Zhdanov,S.; Kiryutin,B.; Lipman,D.J.; Tatusova,T.; Kawaoka,Y.
EPI637237	PB2	China	2013-Jan-01	EPI_ISL_194325	A/Anhui/1-YK_RG78/2013		Import from public-domain	Das,S.R.; Halpin,R.A.; Lin,X.; Simenauer,A.; Akopov,A.; Fedorova,N.; Puri,V.; Stockwell,T.; Amedeo,P.; Bishop,B.; Katzel,D.; Schobel,S.; Shrivastava,S.; Neumann,G.; Bao,Y.; Sanders,R.; Zhdanov,S.; Kiryutin,B.; Lipman,D.J.; Tatusova,T.; Kawaoka,Y.
EPI637230	PB2	China	2013-Jan-01	EPI_ISL_194324	A/Anhui/1-YK_RG77/2013		Import from public-domain	Das,S.R.; Halpin,R.A.; Lin,X.; Simenauer,A.; Akopov,A.; Fedorova,N.; Puri,V.; Stockwell,T.; Amedeo,P.; Bishop,B.; Katzel,D.; Schobel,S.; Shrivastava,S.; Neumann,G.; Bao,Y.; Sanders,R.; Zhdanov,S.; Kiryutin,B.; Lipman,D.J.; Tatusova,T.; Kawaoka,Y.
EPI637204	PB2	China	2013-Jan-01	EPI_ISL_194323	A/Anhui/1-YK_RG75/2013		Import from public-domain	Das,S.R.; Halpin,R.A.; Lin,X.; Simenauer,A.; Akopov,A.; Fedorova,N.; Puri,V.; Stockwell,T.; Amedeo,P.; Bishop,B.; Katzel,D.; Schobel,S.; Shrivastava,S.; Neumann,G.; Bao,Y.; Sanders,R.; Zhdanov,S.; Kiryutin,B.; Lipman,D.J.; Tatusova,T.; Kawaoka,Y.
EPI637190	PB2	China	2013-Jan-01	EPI_ISL_194322	A/Anhui/1-YK_RG73/2013		Import from public-domain	Das,S.R.; Halpin,R.A.; Lin,X.; Simenauer,A.; Akopov,A.; Fedorova,N.; Puri,V.; Stockwell,T.; Amedeo,P.; Bishop,B.; Katzel,D.; Schobel,S.; Shrivastava,S.; Neumann,G.; Bao,Y.; Sanders,R.; Zhdanov,S.; Kiryutin,B.; Lipman,D.J.; Tatusova,T.; Kawaoka,Y.
EPI637197	PB2	China	2013-Jan-01	EPI_ISL_194321	A/Anhui/1-YK_RG74/2013		Import from public-domain	Das,S.R.; Halpin,R.A.; Lin,X.; Simenauer,A.; Akopov,A.; Fedorova,N.; Puri,V.; Stockwell,T.; Amedeo,P.; Bishop,B.; Katzel,D.; Schobel,S.; Shrivastava,S.; Neumann,G.; Bao,Y.; Sanders,R.; Zhdanov,S.; Kiryutin,B.; Lipman,D.J.; Tatusova,T.; Kawaoka,Y.
EPI637069	PB2	China	2015-Aug-27	EPI_ISL_194320	A/Anhui/1-YK_RG56/2013		Import from public-domain	Das,S.R.; Halpin,R.A.; Lin,X.; Simenauer,A.; Akopov,A.; Fedorova,N.; Puri,V.; Stockwell,T.; Amedeo,P.; Bishop,B.; Katzel,D.; Schobel,S.; Shrivastava,S.; Neumann,G.; Bao,Y.; Sanders,R.; Zhdanov,S.; Kiryutin,B.; Lipman,D.J.; Tatusova,T.; Kawaoka,Y.
EPI637183	PB2	China	2013-Jan-01	EPI_ISL_194319	A/Anhui/1-YK_RG72/2013		Import from public-domain	Das,S.R.; Halpin,R.A.; Lin,X.; Simenauer,A.; Akopov,A.; Fedorova,N.; Puri,V.; Stockwell,T.; Amedeo,P.; Bishop,B.; Katzel,D.; Schobel,S.; Shrivastava,S.; Neumann,G.; Bao,Y.; Sanders,R.; Zhdanov,S.; Kiryutin,B.; Lipman,D.J.; Tatusova,T.; Kawaoka,Y.
EPI637176	PB2	China	2013-Jan-01	EPI_ISL_194318	A/Anhui/1-YK_RG71/2013		Import from public-domain	Das,S.R.; Halpin,R.A.; Lin,X.; Simenauer,A.; Akopov,A.; Fedorova,N.; Puri,V.; Stockwell,T.; Amedeo,P.; Bishop,B.; Katzel,D.; Schobel,S.; Shrivastava,S.; Neumann,G.; Bao,Y.; Sanders,R.; Zhdanov,S.; Kiryutin,B.; Lipman,D.J.; Tatusova,T.; Kawaoka,Y.
EPI637168	PB2	China	2013-Jan-01	EPI_ISL_194317	A/Anhui/1-YK_RG70/2013		Import from public-domain	Das,S.R.; Halpin,R.A.; Lin,X.; Simenauer,A.; Akopov,A.; Fedorova,N.; Puri,V.; Stockwell,T.; Amedeo,P.; Bishop,B.; Katzel,D.; Schobel,S.; Shrivastava,S.; Neumann,G.; Bao,Y.; Sanders,R.; Zhdanov,S.; Kiryutin,B.; Lipman,D.J.; Tatusova,T.; Kawaoka,Y.
EPI637160	PB2	China	2013-Jan-01	EPI_ISL_194316	A/Anhui/1-YK_RG69/2013		Import from public-domain	Das,S.R.; Halpin,R.A.; Lin,X.; Simenauer,A.; Akopov,A.; Fedorova,N.; Puri,V.; Stockwell,T.; Amedeo,P.; Bishop,B.; Katzel,D.; Schobel,S.; Shrivastava,S.; Neumann,G.; Bao,Y.; Sanders,R.; Zhdanov,S.; Kiryutin,B.; Lipman,D.J.; Tatusova,T.; Kawaoka,Y.
EPI637153	PB2	China	2013-Jan-01	EPI_ISL_194315	A/Anhui/1-YK_RG68/2013		Import from public-domain	Das,S.R.; Halpin,R.A.; Lin,X.; Simenauer,A.; Akopov,A.; Fedorova,N.; Puri,V.; Stockwell,T.; Amedeo,P.; Bishop,B.; Katzel,D.; Schobel,S.; Shrivastava,S.; Neumann,G.; Bao,Y.; Sanders,R.; Zhdanov,S.; Kiryutin,B.; Lipman,D.J.; Tatusova,T.; Kawaoka,Y.
EPI637146	PB2	China	2013-Jan-01	EPI_ISL_194314	A/Anhui/1-YK_RG67/2013		Import from public-domain	Das,S.R.; Halpin,R.A.; Lin,X.; Simenauer,A.; Akopov,A.; Fedorova,N.; Puri,V.; Stockwell,T.; Amedeo,P.; Bishop,B.; Katzel,D.; Schobel,S.; Shrivastava,S.; Neumann,G.; Bao,Y.; Sanders,R.; Zhdanov,S.; Kiryutin,B.; Lipman,D.J.; Tatusova,T.; Kawaoka,Y.
EPI637139	PB2	China	2013-Jan-01	EPI_ISL_194313	A/Anhui/1-YK_RG66/2013		Import from public-domain	Das,S.R.; Halpin,R.A.; Lin,X.; Simenauer,A.; Akopov,A.; Fedorova,N.; Puri,V.; Stockwell,T.; Amedeo,P.; Bishop,B.; Katzel,D.; Schobel,S.; Shrivastava,S.; Neumann,G.; Bao,Y.; Sanders,R.; Zhdanov,S.; Kiryutin,B.; Lipman,D.J.; Tatusova,T.; Kawaoka,Y.
EPI637132	PB2	China	2013-Jan-01	EPI_ISL_194312	A/Anhui/1-YK_RG65/2013		Import from public-domain	Das,S.R.; Halpin,R.A.; Lin,X.; Simenauer,A.; Akopov,A.; Fedorova,N.; Puri,V.; Stockwell,T.; Amedeo,P.; Bishop,B.; Katzel,D.; Schobel,S.; Shrivastava,S.; Neumann,G.; Bao,Y.; Sanders,R.; Zhdanov,S.; Kiryutin,B.; Lipman,D.J.; Tatusova,T.; Kawaoka,Y.
EPI637125	PB2	China	2013-Jan-01	EPI_ISL_194311	A/Anhui/1-YK_RG64/2013		Import from public-domain	Das,S.R.; Halpin,R.A.; Lin,X.; Simenauer,A.; Akopov,A.; Fedorova,N.; Puri,V.; Stockwell,T.; Amedeo,P.; Bishop,B.; Katzel,D.; Schobel,S.; Shrivastava,S.; Neumann,G.; Bao,Y.; Sanders,R.; Zhdanov,S.; Kiryutin,B.; Lipman,D.J.; Tatusova,T.; Kawaoka,Y.
EPI637118	PB2	China	2013-Jan-01	EPI_ISL_194310	A/Anhui/1-YK_RG63/2013		Import from public-domain	Das,S.R.; Halpin,R.A.; Lin,X.; Simenauer,A.; Akopov,A.; Fedorova,N.; Puri,V.; Stockwell,T.; Amedeo,P.; Bishop,B.; Katzel,D.; Schobel,S.; Shrivastava,S.; Neumann,G.; Bao,Y.; Sanders,R.; Zhdanov,S.; Kiryutin,B.; Lipman,D.J.; Tatusova,T.; Kawaoka,Y.
EPI637111	PB2	China	2013-Jan-01	EPI_ISL_194309	A/Anhui/1-YK_RG62/2013		Import from public-domain	Das,S.R.; Halpin,R.A.; Lin,X.; Simenauer,A.; Akopov,A.; Fedorova,N.; Puri,V.; Stockwell,T.; Amedeo,P.; Bishop,B.; Katzel,D.; Schobel,S.; Shrivastava,S.; Neumann,G.; Bao,Y.; Sanders,R.; Zhdanov,S.; Kiryutin,B.; Lipman,D.J.; Tatusova,T.; Kawaoka,Y.
EPI637104	PB2	China	2013-Jan-01	EPI_ISL_194308	A/Anhui/1-YK_RG61/2013		Import from public-domain	Das,S.R.; Halpin,R.A.; Lin,X.; Simenauer,A.; Akopov,A.; Fedorova,N.; Puri,V.; Stockwell,T.; Amedeo,P.; Bishop,B.; Katzel,D.; Schobel,S.; Shrivastava,S.; Neumann,G.; Bao,Y.; Sanders,R.; Zhdanov,S.; Kiryutin,B.; Lipman,D.J.; Tatusova,T.; Kawaoka,Y.
EPI637097	PB2	China	2013-Jan-01	EPI_ISL_194307	A/Anhui/1-YK_RG60/2013		Import from public-domain	Das,S.R.; Halpin,R.A.; Lin,X.; Simenauer,A.; Akopov,A.; Fedorova,N.; Puri,V.; Stockwell,T.; Amedeo,P.; Bishop,B.; Katzel,D.; Schobel,S.; Shrivastava,S.; Neumann,G.; Bao,Y.; Sanders,R.; Zhdanov,S.; Kiryutin,B.; Lipman,D.J.; Tatusova,T.; Kawaoka,Y.
EPI637090	PB2	China	2013-Jan-01	EPI_ISL_194306	A/Anhui/1-YK_RG59/2013		Import from public-domain	Das,S.R.; Halpin,R.A.; Lin,X.; Simenauer,A.; Akopov,A.; Fedorova,N.; Puri,V.; Stockwell,T.; Amedeo,P.; Bishop,B.; Katzel,D.; Schobel,S.; Shrivastava,S.; Neumann,G.; Bao,Y.; Sanders,R.; Zhdanov,S.; Kiryutin,B.; Lipman,D.J.; Tatusova,T.; Kawaoka,Y.
EPI637083	PB2	China	2013-Jan-01	EPI_ISL_194305	A/Anhui/1-YK_RG58/2013		Import from public-domain	Das,S.R.; Halpin,R.A.; Lin,X.; Simenauer,A.; Akopov,A.; Fedorova,N.; Puri,V.; Stockwell,T.; Amedeo,P.; Bishop,B.; Katzel,D.; Schobel,S.; Shrivastava,S.; Neumann,G.; Bao,Y.; Sanders,R.; Zhdanov,S.; Kiryutin,B.; Lipman,D.J.; Tatusova,T.; Kawaoka,Y.
EPI637076	PB2	China	2013-Jan-01	EPI_ISL_194304	A/Anhui/1-YK_RG57/2013		Import from public-domain	Das,S.R.; Halpin,R.A.; Lin,X.; Simenauer,A.; Akopov,A.; Fedorova,N.; Puri,V.; Stockwell,T.; Amedeo,P.; Bishop,B.; Katzel,D.; Schobel,S.; Shrivastava,S.; Neumann,G.; Bao,Y.; Sanders,R.; Zhdanov,S.; Kiryutin,B.; Lipman,D.J.; Tatusova,T.; Kawaoka,Y.
EPI637062	PB2	China	2013-Jan-01	EPI_ISL_194303	A/Anhui/1-YK_RG55/2013		Import from public-domain	Das,S.R.; Halpin,R.A.; Lin,X.; Simenauer,A.; Akopov,A.; Fedorova,N.; Puri,V.; Stockwell,T.; Amedeo,P.; Bishop,B.; Katzel,D.; Schobel,S.; Shrivastava,S.; Neumann,G.; Bao,Y.; Sanders,R.; Zhdanov,S.; Kiryutin,B.; Lipman,D.J.; Tatusova,T.; Kawaoka,Y.
EPI637006	PB2	China	2013-Jan-01	EPI_ISL_194302	A/Anhui/1-YK_RG47/2013		Import from public-domain	Das,S.R.; Halpin,R.A.; Lin,X.; Simenauer,A.; Akopov,A.; Fedorova,N.; Puri,V.; Stockwell,T.; Amedeo,P.; Bishop,B.; Katzel,D.; Schobel,S.; Shrivastava,S.; Neumann,G.; Bao,Y.; Sanders,R.; Zhdanov,S.; Kiryutin,B.; Lipman,D.J.; Tatusova,T.; Kawaoka,Y.
EPI637055	PB2	China	2013-Jan-01	EPI_ISL_194301	A/Anhui/1-YK_RG54/2013		Import from public-domain	Das,S.R.; Halpin,R.A.; Lin,X.; Simenauer,A.; Akopov,A.; Fedorova,N.; Puri,V.; Stockwell,T.; Amedeo,P.; Bishop,B.; Katzel,D.; Schobel,S.; Shrivastava,S.; Neumann,G.; Bao,Y.; Sanders,R.; Zhdanov,S.; Kiryutin,B.; Lipman,D.J.; Tatusova,T.; Kawaoka,Y.
EPI637048	PB2	China	2013-Jan-01	EPI_ISL_194300	A/Anhui/1-YK_RG53/2013		Import from public-domain	Das,S.R.; Halpin,R.A.; Lin,X.; Simenauer,A.; Akopov,A.; Fedorova,N.; Puri,V.; Stockwell,T.; Amedeo,P.; Bishop,B.; Katzel,D.; Schobel,S.; Shrivastava,S.; Neumann,G.; Bao,Y.; Sanders,R.; Zhdanov,S.; Kiryutin,B.; Lipman,D.J.; Tatusova,T.; Kawaoka,Y.
EPI637041	PB2	China	2013-Jan-01	EPI_ISL_194299	A/Anhui/1-YK_RG52/2013		Import from public-domain	Das,S.R.; Halpin,R.A.; Lin,X.; Simenauer,A.; Akopov,A.; Fedorova,N.; Puri,V.; Stockwell,T.; Amedeo,P.; Bishop,B.; Katzel,D.; Schobel,S.; Shrivastava,S.; Neumann,G.; Bao,Y.; Sanders,R.; Zhdanov,S.; Kiryutin,B.; Lipman,D.J.; Tatusova,T.; Kawaoka,Y.
EPI637034	PB2	China	2013-Jan-01	EPI_ISL_194298	A/Anhui/1-YK_RG51/2013		Import from public-domain	Das,S.R.; Halpin,R.A.; Lin,X.; Simenauer,A.; Akopov,A.; Fedorova,N.; Puri,V.; Stockwell,T.; Amedeo,P.; Bishop,B.; Katzel,D.; Schobel,S.; Shrivastava,S.; Neumann,G.; Bao,Y.; Sanders,R.; Zhdanov,S.; Kiryutin,B.; Lipman,D.J.; Tatusova,T.; Kawaoka,Y.
EPI637027	PB2	China	2013-Jan-01	EPI_ISL_194297	A/Anhui/1-YK_RG50/2013		Import from public-domain	Das,S.R.; Halpin,R.A.; Lin,X.; Simenauer,A.; Akopov,A.; Fedorova,N.; Puri,V.; Stockwell,T.; Amedeo,P.; Bishop,B.; Katzel,D.; Schobel,S.; Shrivastava,S.; Neumann,G.; Bao,Y.; Sanders,R.; Zhdanov,S.; Kiryutin,B.; Lipman,D.J.; Tatusova,T.; Kawaoka,Y.
EPI637020	PB2	China	2013-Jan-01	EPI_ISL_194296	A/Anhui/1-YK_RG49/2013		Import from public-domain	Das,S.R.; Halpin,R.A.; Lin,X.; Simenauer,A.; Akopov,A.; Fedorova,N.; Puri,V.; Stockwell,T.; Amedeo,P.; Bishop,B.; Katzel,D.; Schobel,S.; Shrivastava,S.; Neumann,G.; Bao,Y.; Sanders,R.; Zhdanov,S.; Kiryutin,B.; Lipman,D.J.; Tatusova,T.; Kawaoka,Y.
EPI637013	PB2	China	2013-Jan-01	EPI_ISL_194295	A/Anhui/1-YK_RG48/2013		Import from public-domain	Das,S.R.; Halpin,R.A.; Lin,X.; Simenauer,A.; Akopov,A.; Fedorova,N.; Puri,V.; Stockwell,T.; Amedeo,P.; Bishop,B.; Katzel,D.; Schobel,S.; Shrivastava,S.; Neumann,G.; Bao,Y.; Sanders,R.; Zhdanov,S.; Kiryutin,B.; Lipman,D.J.; Tatusova,T.; Kawaoka,Y.
EPI636999	PB2	China	2013-Jan-01	EPI_ISL_194294	A/Anhui/1-YK_RG46/2013		Import from public-domain	Das,S.R.; Halpin,R.A.; Lin,X.; Simenauer,A.; Akopov,A.; Fedorova,N.; Puri,V.; Stockwell,T.; Amedeo,P.; Bishop,B.; Katzel,D.; Schobel,S.; Shrivastava,S.; Neumann,G.; Bao,Y.; Sanders,R.; Zhdanov,S.; Kiryutin,B.; Lipman,D.J.; Tatusova,T.; Kawaoka,Y.
EPI636992	PB2	China	2013-Jan-01	EPI_ISL_194293	A/Anhui/1-YK_RG45/2013		Import from public-domain	Das,S.R.; Halpin,R.A.; Lin,X.; Simenauer,A.; Akopov,A.; Fedorova,N.; Puri,V.; Stockwell,T.; Amedeo,P.; Bishop,B.; Katzel,D.; Schobel,S.; Shrivastava,S.; Neumann,G.; Bao,Y.; Sanders,R.; Zhdanov,S.; Kiryutin,B.; Lipman,D.J.; Tatusova,T.; Kawaoka,Y.
EPI636936	PB2	China	2013-Jan-01	EPI_ISL_194292	A/Anhui/1-YK_RG37/2013		Import from public-domain	Das,S.R.; Halpin,R.A.; Lin,X.; Simenauer,A.; Akopov,A.; Fedorova,N.; Puri,V.; Stockwell,T.; Amedeo,P.; Bishop,B.; Katzel,D.; Schobel,S.; Shrivastava,S.; Neumann,G.; Bao,Y.; Sanders,R.; Zhdanov,S.; Kiryutin,B.; Lipman,D.J.; Tatusova,T.; Kawaoka,Y.
EPI636985	PB2	China	2013-Jan-01	EPI_ISL_194291	A/Anhui/1-YK_RG44/2013		Import from public-domain	Das,S.R.; Halpin,R.A.; Lin,X.; Simenauer,A.; Akopov,A.; Fedorova,N.; Puri,V.; Stockwell,T.; Amedeo,P.; Bishop,B.; Katzel,D.; Schobel,S.; Shrivastava,S.; Neumann,G.; Bao,Y.; Sanders,R.; Zhdanov,S.; Kiryutin,B.; Lipman,D.J.; Tatusova,T.; Kawaoka,Y.
EPI636978	PB2	China	2013-Jan-01	EPI_ISL_194290	A/Anhui/1-YK_RG43/2013		Import from public-domain	Das,S.R.; Halpin,R.A.; Lin,X.; Simenauer,A.; Akopov,A.; Fedorova,N.; Puri,V.; Stockwell,T.; Amedeo,P.; Bishop,B.; Katzel,D.; Schobel,S.; Shrivastava,S.; Neumann,G.; Bao,Y.; Sanders,R.; Zhdanov,S.; Kiryutin,B.; Lipman,D.J.; Tatusova,T.; Kawaoka,Y.
EPI636971	PB2	China	2013-Jan-01	EPI_ISL_194289	A/Anhui/1-YK_RG42/2013		Import from public-domain	Das,S.R.; Halpin,R.A.; Lin,X.; Simenauer,A.; Akopov,A.; Fedorova,N.; Puri,V.; Stockwell,T.; Amedeo,P.; Bishop,B.; Katzel,D.; Schobel,S.; Shrivastava,S.; Neumann,G.; Bao,Y.; Sanders,R.; Zhdanov,S.; Kiryutin,B.; Lipman,D.J.; Tatusova,T.; Kawaoka,Y.
EPI636964	PB2	China	2013-Jan-01	EPI_ISL_194288	A/Anhui/1-YK_RG41/2013		Import from public-domain	Das,S.R.; Halpin,R.A.; Lin,X.; Simenauer,A.; Akopov,A.; Fedorova,N.; Puri,V.; Stockwell,T.; Amedeo,P.; Bishop,B.; Katzel,D.; Schobel,S.; Shrivastava,S.; Neumann,G.; Bao,Y.; Sanders,R.; Zhdanov,S.; Kiryutin,B.; Lipman,D.J.; Tatusova,T.; Kawaoka,Y.
EPI636957	PB2	China	2013-Jan-01	EPI_ISL_194287	A/Anhui/1-YK_RG40/2013		Import from public-domain	Das,S.R.; Halpin,R.A.; Lin,X.; Simenauer,A.; Akopov,A.; Fedorova,N.; Puri,V.; Stockwell,T.; Amedeo,P.; Bishop,B.; Katzel,D.; Schobel,S.; Shrivastava,S.; Neumann,G.; Bao,Y.; Sanders,R.; Zhdanov,S.; Kiryutin,B.; Lipman,D.J.; Tatusova,T.; Kawaoka,Y.
EPI636950	PB2	China	2013-Jan-01	EPI_ISL_194286	A/Anhui/1-YK_RG39/2013		Import from public-domain	Das,S.R.; Halpin,R.A.; Lin,X.; Simenauer,A.; Akopov,A.; Fedorova,N.; Puri,V.; Stockwell,T.; Amedeo,P.; Bishop,B.; Katzel,D.; Schobel,S.; Shrivastava,S.; Neumann,G.; Bao,Y.; Sanders,R.; Zhdanov,S.; Kiryutin,B.; Lipman,D.J.; Tatusova,T.; Kawaoka,Y.
EPI636943	PB2	China	2013-Jan-01	EPI_ISL_194285	A/Anhui/1-YK_RG38/2013		Import from public-domain	Das,S.R.; Halpin,R.A.; Lin,X.; Simenauer,A.; Akopov,A.; Fedorova,N.; Puri,V.; Stockwell,T.; Amedeo,P.; Bishop,B.; Katzel,D.; Schobel,S.; Shrivastava,S.; Neumann,G.; Bao,Y.; Sanders,R.; Zhdanov,S.; Kiryutin,B.; Lipman,D.J.; Tatusova,T.; Kawaoka,Y.
EPI636920	PB2	China	2013-Jan-01	EPI_ISL_194284	A/Anhui/1-YK_RG35/2013		Import from public-domain	Das,S.R.; Halpin,R.A.; Lin,X.; Simenauer,A.; Akopov,A.; Fedorova,N.; Puri,V.; Stockwell,T.; Amedeo,P.; Bishop,B.; Katzel,D.; Schobel,S.; Shrivastava,S.; Neumann,G.; Bao,Y.; Sanders,R.; Zhdanov,S.; Kiryutin,B.; Lipman,D.J.; Tatusova,T.; Kawaoka,Y.
EPI636929	PB2	China	2013-Jan-01	EPI_ISL_194283	A/Anhui/1-YK_RG36/2013		Import from public-domain	Das,S.R.; Halpin,R.A.; Lin,X.; Simenauer,A.; Akopov,A.; Fedorova,N.; Puri,V.; Stockwell,T.; Amedeo,P.; Bishop,B.; Katzel,D.; Schobel,S.; Shrivastava,S.; Neumann,G.; Bao,Y.; Sanders,R.; Zhdanov,S.; Kiryutin,B.; Lipman,D.J.; Tatusova,T.; Kawaoka,Y.
EPI636913	PB2	China	2013-Jan-01	EPI_ISL_194282	A/Anhui/1-YK_RG34/2013		Import from public-domain	Das,S.R.; Halpin,R.A.; Lin,X.; Simenauer,A.; Akopov,A.; Fedorova,N.; Puri,V.; Stockwell,T.; Amedeo,P.; Bishop,B.; Katzel,D.; Schobel,S.; Shrivastava,S.; Neumann,G.; Bao,Y.; Sanders,R.; Zhdanov,S.; Kiryutin,B.; Lipman,D.J.; Tatusova,T.; Kawaoka,Y.
EPI636906	PB2	China	2013-Jan-01	EPI_ISL_194281	A/Anhui/1-YK_RG33/2013		Import from public-domain	Das,S.R.; Halpin,R.A.; Lin,X.; Simenauer,A.; Akopov,A.; Fedorova,N.; Puri,V.; Stockwell,T.; Amedeo,P.; Bishop,B.; Katzel,D.; Schobel,S.; Shrivastava,S.; Neumann,G.; Bao,Y.; Sanders,R.; Zhdanov,S.; Kiryutin,B.; Lipman,D.J.; Tatusova,T.; Kawaoka,Y.
EPI636899	PB2	China	2013-Jan-01	EPI_ISL_194280	A/Anhui/1-YK_RG32/2013		Import from public-domain	Das,S.R.; Halpin,R.A.; Lin,X.; Simenauer,A.; Akopov,A.; Fedorova,N.; Puri,V.; Stockwell,T.; Amedeo,P.; Bishop,B.; Katzel,D.; Schobel,S.; Shrivastava,S.; Neumann,G.; Bao,Y.; Sanders,R.; Zhdanov,S.; Kiryutin,B.; Lipman,D.J.; Tatusova,T.; Kawaoka,Y.
EPI636869	PB2	China	2013-Jan-01	EPI_ISL_194279	A/Anhui/1-YK_RG28/2013		Import from public-domain	Das,S.R.; Halpin,R.A.; Lin,X.; Simenauer,A.; Akopov,A.; Fedorova,N.; Puri,V.; Stockwell,T.; Amedeo,P.; Bishop,B.; Katzel,D.; Schobel,S.; Shrivastava,S.; Neumann,G.; Bao,Y.; Sanders,R.; Zhdanov,S.; Kiryutin,B.; Lipman,D.J.; Tatusova,T.; Kawaoka,Y.
EPI636891	PB2	China	2013-Jan-01	EPI_ISL_194278	A/Anhui/1-YK_RG31/2013		Import from public-domain	Das,S.R.; Halpin,R.A.; Lin,X.; Simenauer,A.; Akopov,A.; Fedorova,N.; Puri,V.; Stockwell,T.; Amedeo,P.; Bishop,B.; Katzel,D.; Schobel,S.; Shrivastava,S.; Neumann,G.; Bao,Y.; Sanders,R.; Zhdanov,S.; Kiryutin,B.; Lipman,D.J.; Tatusova,T.; Kawaoka,Y.
EPI636883	PB2	China	2013-Jan-01	EPI_ISL_194277	A/Anhui/1-YK_RG30/2013		Import from public-domain	Das,S.R.; Halpin,R.A.; Lin,X.; Simenauer,A.; Akopov,A.; Fedorova,N.; Puri,V.; Stockwell,T.; Amedeo,P.; Bishop,B.; Katzel,D.; Schobel,S.; Shrivastava,S.; Neumann,G.; Bao,Y.; Sanders,R.; Zhdanov,S.; Kiryutin,B.; Lipman,D.J.; Tatusova,T.; Kawaoka,Y.
EPI636876	PB2	China	2013-Jan-01	EPI_ISL_194276	A/Anhui/1-YK_RG29/2013		Import from public-domain	Das,S.R.; Halpin,R.A.; Lin,X.; Simenauer,A.; Akopov,A.; Fedorova,N.; Puri,V.; Stockwell,T.; Amedeo,P.; Bishop,B.; Katzel,D.; Schobel,S.; Shrivastava,S.; Neumann,G.; Bao,Y.; Sanders,R.; Zhdanov,S.; Kiryutin,B.; Lipman,D.J.; Tatusova,T.; Kawaoka,Y.
EPI636862	PB2	China	2013-Jan-01	EPI_ISL_194275	A/Anhui/1-YK_RG27/2013		Import from public-domain	Das,S.R.; Halpin,R.A.; Lin,X.; Simenauer,A.; Akopov,A.; Fedorova,N.; Puri,V.; Stockwell,T.; Amedeo,P.; Bishop,B.; Katzel,D.; Schobel,S.; Shrivastava,S.; Neumann,G.; Bao,Y.; Sanders,R.; Zhdanov,S.; Kiryutin,B.; Lipman,D.J.; Tatusova,T.; Kawaoka,Y.
EPI636855	PB2	China	2013-Jan-01	EPI_ISL_194274	A/Anhui/1-YK_RG26/2013		Import from public-domain	Das,S.R.; Halpin,R.A.; Lin,X.; Simenauer,A.; Akopov,A.; Fedorova,N.; Puri,V.; Stockwell,T.; Amedeo,P.; Bishop,B.; Katzel,D.; Schobel,S.; Shrivastava,S.; Neumann,G.; Bao,Y.; Sanders,R.; Zhdanov,S.; Kiryutin,B.; Lipman,D.J.; Tatusova,T.; Kawaoka,Y.
EPI636846	PB2	China	2013-Jan-01	EPI_ISL_194273	A/Anhui/1-YK_RG25/2013		Import from public-domain	Das,S.R.; Halpin,R.A.; Lin,X.; Simenauer,A.; Akopov,A.; Fedorova,N.; Puri,V.; Stockwell,T.; Amedeo,P.; Bishop,B.; Katzel,D.; Schobel,S.; Shrivastava,S.; Neumann,G.; Bao,Y.; Sanders,R.; Zhdanov,S.; Kiryutin,B.; Lipman,D.J.; Tatusova,T.; Kawaoka,Y.
EPI636803	PB2	China	2013-Jan-01	EPI_ISL_194272	A/Anhui/1-YK_RG19/2013		Import from public-domain	Das,S.R.; Halpin,R.A.; Lin,X.; Simenauer,A.; Akopov,A.; Fedorova,N.; Puri,V.; Stockwell,T.; Amedeo,P.; Bishop,B.; Katzel,D.; Schobel,S.; Shrivastava,S.; Neumann,G.; Bao,Y.; Sanders,R.; Zhdanov,S.; Kiryutin,B.; Lipman,D.J.; Tatusova,T.; Kawaoka,Y.
EPI636839	PB2	China	2013-Jan-01	EPI_ISL_194271	A/Anhui/1-YK_RG24/2013		Import from public-domain	Das,S.R.; Halpin,R.A.; Lin,X.; Simenauer,A.; Akopov,A.; Fedorova,N.; Puri,V.; Stockwell,T.; Amedeo,P.; Bishop,B.; Katzel,D.; Schobel,S.; Shrivastava,S.; Neumann,G.; Bao,Y.; Sanders,R.; Zhdanov,S.; Kiryutin,B.; Lipman,D.J.; Tatusova,T.; Kawaoka,Y.
EPI636832	PB2	China	2013-Jan-01	EPI_ISL_194270	A/Anhui/1-YK_RG23/2013		Import from public-domain	Das,S.R.; Halpin,R.A.; Lin,X.; Simenauer,A.; Akopov,A.; Fedorova,N.; Puri,V.; Stockwell,T.; Amedeo,P.; Bishop,B.; Katzel,D.; Schobel,S.; Shrivastava,S.; Neumann,G.; Bao,Y.; Sanders,R.; Zhdanov,S.; Kiryutin,B.; Lipman,D.J.; Tatusova,T.; Kawaoka,Y.
EPI636825	PB2	China	2013-Jan-01	EPI_ISL_194269	A/Anhui/1-YK_RG22/2013		Import from public-domain	Das,S.R.; Halpin,R.A.; Lin,X.; Simenauer,A.; Akopov,A.; Fedorova,N.; Puri,V.; Stockwell,T.; Amedeo,P.; Bishop,B.; Katzel,D.; Schobel,S.; Shrivastava,S.; Neumann,G.; Bao,Y.; Sanders,R.; Zhdanov,S.; Kiryutin,B.; Lipman,D.J.; Tatusova,T.; Kawaoka,Y.
EPI636818	PB2	China	2013-Jan-01	EPI_ISL_194268	A/Anhui/1-YK_RG21/2013		Import from public-domain	Das,S.R.; Halpin,R.A.; Lin,X.; Simenauer,A.; Akopov,A.; Fedorova,N.; Puri,V.; Stockwell,T.; Amedeo,P.; Bishop,B.; Katzel,D.; Schobel,S.; Shrivastava,S.; Neumann,G.; Bao,Y.; Sanders,R.; Zhdanov,S.; Kiryutin,B.; Lipman,D.J.; Tatusova,T.; Kawaoka,Y.
EPI636811	PB2	China	2013-Jan-01	EPI_ISL_194267	A/Anhui/1-YK_RG20/2013		Import from public-domain	Das,S.R.; Halpin,R.A.; Lin,X.; Simenauer,A.; Akopov,A.; Fedorova,N.; Puri,V.; Stockwell,T.; Amedeo,P.; Bishop,B.; Katzel,D.; Schobel,S.; Shrivastava,S.; Neumann,G.; Bao,Y.; Sanders,R.; Zhdanov,S.; Kiryutin,B.; Lipman,D.J.; Tatusova,T.; Kawaoka,Y.
EPI636793	PB2	China	2013-Jan-01	EPI_ISL_194266	A/Anhui/1-YK_RG18/2013		Import from public-domain	Das,S.R.; Halpin,R.A.; Lin,X.; Simenauer,A.; Akopov,A.; Fedorova,N.; Puri,V.; Stockwell,T.; Amedeo,P.; Bishop,B.; Katzel,D.; Schobel,S.; Shrivastava,S.; Neumann,G.; Bao,Y.; Sanders,R.; Zhdanov,S.; Kiryutin,B.; Lipman,D.J.; Tatusova,T.; Kawaoka,Y.
EPI636786	PB2	China	2013-Jan-01	EPI_ISL_194265	A/Anhui/1-YK_RG17/2013		Import from public-domain	Das,S.R.; Halpin,R.A.; Lin,X.; Simenauer,A.; Akopov,A.; Fedorova,N.; Puri,V.; Stockwell,T.; Amedeo,P.; Bishop,B.; Katzel,D.; Schobel,S.; Shrivastava,S.; Neumann,G.; Bao,Y.; Sanders,R.; Zhdanov,S.; Kiryutin,B.; Lipman,D.J.; Tatusova,T.; Kawaoka,Y.
EPI636779	PB2	China	2013-Jan-01	EPI_ISL_194264	A/Anhui/1-YK_RG16/2013		Import from public-domain	Das,S.R.; Halpin,R.A.; Lin,X.; Simenauer,A.; Akopov,A.; Fedorova,N.; Puri,V.; Stockwell,T.; Amedeo,P.; Bishop,B.; Katzel,D.; Schobel,S.; Shrivastava,S.; Neumann,G.; Bao,Y.; Sanders,R.; Zhdanov,S.; Kiryutin,B.; Lipman,D.J.; Tatusova,T.; Kawaoka,Y.
EPI636765	PB2	China	2013-Jan-01	EPI_ISL_194263	A/Anhui/1-YK_RG14/2013		Import from public-domain	Das,S.R.; Halpin,R.A.; Lin,X.; Simenauer,A.; Akopov,A.; Fedorova,N.; Puri,V.; Stockwell,T.; Amedeo,P.; Bishop,B.; Katzel,D.; Schobel,S.; Shrivastava,S.; Neumann,G.; Bao,Y.; Sanders,R.; Zhdanov,S.; Kiryutin,B.; Lipman,D.J.; Tatusova,T.; Kawaoka,Y.
EPI636772	PB2	China	2013-Jan-01	EPI_ISL_194262	A/Anhui/1-YK_RG15/2013		Import from public-domain	Das,S.R.; Halpin,R.A.; Lin,X.; Simenauer,A.; Akopov,A.; Fedorova,N.; Puri,V.; Stockwell,T.; Amedeo,P.; Bishop,B.; Katzel,D.; Schobel,S.; Shrivastava,S.; Neumann,G.; Bao,Y.; Sanders,R.; Zhdanov,S.; Kiryutin,B.; Lipman,D.J.; Tatusova,T.; Kawaoka,Y.
EPI636758	PB2	China	2013-Jan-01	EPI_ISL_194261	A/Anhui/1-YK_RG13/2013		Import from public-domain	Das,S.R.; Halpin,R.A.; Lin,X.; Simenauer,A.; Akopov,A.; Fedorova,N.; Puri,V.; Stockwell,T.; Amedeo,P.; Bishop,B.; Katzel,D.; Schobel,S.; Shrivastava,S.; Neumann,G.; Bao,Y.; Sanders,R.; Zhdanov,S.; Kiryutin,B.; Lipman,D.J.; Tatusova,T.; Kawaoka,Y.
EPI636744	PB2	China	2013-Jan-01	EPI_ISL_194260	A/Anhui/1-YK_RG10/2013		Import from public-domain	Das,S.R.; Halpin,R.A.; Lin,X.; Simenauer,A.; Akopov,A.; Fedorova,N.; Puri,V.; Stockwell,T.; Amedeo,P.; Bishop,B.; Katzel,D.; Schobel,S.; Shrivastava,S.; Neumann,G.; Bao,Y.; Sanders,R.; Zhdanov,S.; Kiryutin,B.; Lipman,D.J.; Tatusova,T.; Kawaoka,Y.
EPI636751	PB2	China	2013-Jan-01	EPI_ISL_194259	A/Anhui/1-YK_RG12/2013		Import from public-domain	Das,S.R.; Halpin,R.A.; Lin,X.; Simenauer,A.; Akopov,A.; Fedorova,N.; Puri,V.; Stockwell,T.; Amedeo,P.; Bishop,B.; Katzel,D.; Schobel,S.; Shrivastava,S.; Neumann,G.; Bao,Y.; Sanders,R.; Zhdanov,S.; Kiryutin,B.; Lipman,D.J.; Tatusova,T.; Kawaoka,Y.
EPI636728	PB2	China	2013-Jan-01	EPI_ISL_194258	A/Anhui/1-YK_RG08/2013		Import from public-domain	Das,S.R.; Halpin,R.A.; Lin,X.; Simenauer,A.; Akopov,A.; Fedorova,N.; Puri,V.; Stockwell,T.; Amedeo,P.; Bishop,B.; Katzel,D.; Schobel,S.; Shrivastava,S.; Neumann,G.; Bao,Y.; Sanders,R.; Zhdanov,S.; Kiryutin,B.; Lipman,D.J.; Tatusova,T.; Kawaoka,Y.
EPI636736	PB2	China	2013-Jan-01	EPI_ISL_194257	A/Anhui/1-YK_RG09/2013		Import from public-domain	Das,S.R.; Halpin,R.A.; Lin,X.; Simenauer,A.; Akopov,A.; Fedorova,N.; Puri,V.; Stockwell,T.; Amedeo,P.; Bishop,B.; Katzel,D.; Schobel,S.; Shrivastava,S.; Neumann,G.; Bao,Y.; Sanders,R.; Zhdanov,S.; Kiryutin,B.; Lipman,D.J.; Tatusova,T.; Kawaoka,Y.
EPI636707	PB2	China	2013-Jan-01	EPI_ISL_194256	A/Anhui/1-YK_RG05/2013		Import from public-domain	Das,S.R.; Halpin,R.A.; Lin,X.; Simenauer,A.; Akopov,A.; Fedorova,N.; Puri,V.; Stockwell,T.; Amedeo,P.; Bishop,B.; Katzel,D.; Schobel,S.; Shrivastava,S.; Neumann,G.; Bao,Y.; Sanders,R.; Zhdanov,S.; Kiryutin,B.; Lipman,D.J.; Tatusova,T.; Kawaoka,Y.
EPI636721	PB2	China	2013-Jan-01	EPI_ISL_194255	A/Anhui/1-YK_RG07/2013		Import from public-domain	Das,S.R.; Halpin,R.A.; Lin,X.; Simenauer,A.; Akopov,A.; Fedorova,N.; Puri,V.; Stockwell,T.; Amedeo,P.; Bishop,B.; Katzel,D.; Schobel,S.; Shrivastava,S.; Neumann,G.; Bao,Y.; Sanders,R.; Zhdanov,S.; Kiryutin,B.; Lipman,D.J.; Tatusova,T.; Kawaoka,Y.
EPI636714	PB2	China	2013-Jan-01	EPI_ISL_194254	A/Anhui/1-YK_RG06/2013		Import from public-domain	Das,S.R.; Halpin,R.A.; Lin,X.; Simenauer,A.; Akopov,A.; Fedorova,N.; Puri,V.; Stockwell,T.; Amedeo,P.; Bishop,B.; Katzel,D.; Schobel,S.; Shrivastava,S.; Neumann,G.; Bao,Y.; Sanders,R.; Zhdanov,S.; Kiryutin,B.; Lipman,D.J.; Tatusova,T.; Kawaoka,Y.
EPI636700	PB2	China	2013-Jan-01	EPI_ISL_194253	A/Anhui/1-YK_RG04/2013		Import from public-domain	Das,S.R.; Halpin,R.A.; Lin,X.; Simenauer,A.; Akopov,A.; Fedorova,N.; Puri,V.; Stockwell,T.; Amedeo,P.; Bishop,B.; Katzel,D.; Schobel,S.; Shrivastava,S.; Neumann,G.; Bao,Y.; Sanders,R.; Zhdanov,S.; Kiryutin,B.; Lipman,D.J.; Tatusova,T.; Kawaoka,Y.
EPI636686	PB2	China	2013-Jan-01	EPI_ISL_194252	A/Anhui/1-YK_RG02/2013		Import from public-domain	Das,S.R.; Halpin,R.A.; Lin,X.; Simenauer,A.; Akopov,A.; Fedorova,N.; Puri,V.; Stockwell,T.; Amedeo,P.; Bishop,B.; Katzel,D.; Schobel,S.; Shrivastava,S.; Neumann,G.; Bao,Y.; Sanders,R.; Zhdanov,S.; Kiryutin,B.; Lipman,D.J.; Tatusova,T.; Kawaoka,Y.
EPI636693	PB2	China	2013-Jan-01	EPI_ISL_194251	A/Anhui/1-YK_RG03/2013		Import from public-domain	Das,S.R.; Halpin,R.A.; Lin,X.; Simenauer,A.; Akopov,A.; Fedorova,N.; Puri,V.; Stockwell,T.; Amedeo,P.; Bishop,B.; Katzel,D.; Schobel,S.; Shrivastava,S.; Neumann,G.; Bao,Y.; Sanders,R.; Zhdanov,S.; Kiryutin,B.; Lipman,D.J.; Tatusova,T.; Kawaoka,Y.
EPI636679	PB2	China	2013-Jan-01	EPI_ISL_194250	A/Anhui/1-YK_RG01/2013		Import from public-domain	Das,S.R.; Halpin,R.A.; Lin,X.; Simenauer,A.; Akopov,A.; Fedorova,N.; Puri,V.; Stockwell,T.; Amedeo,P.; Bishop,B.; Katzel,D.; Schobel,S.; Shrivastava,S.; Neumann,G.; Bao,Y.; Sanders,R.; Zhdanov,S.; Kiryutin,B.; Lipman,D.J.; Tatusova,T.; Kawaoka,Y.
EPI628829	PB2	China	2015-Feb-25	EPI_ISL_192505	A/Zhejiang/9/2015	WHO Chinese National Influenza Center	WHO Chinese National Influenza Center	Wang,Dayan;Gao,Rongbao;Yang,Lei;Zhou,Shumei;Li,Xiyan;Zhou,Jianfang;Zhu,Wenfei;Guo,Junfeng;Li,Xiaodan;Dong,Jie;Huang,Weijuan;Zhang,Ye;Dong,Libo;Zhao,Xiang;Lu,Jian;Lan,Yu;Shu,Yuelong
EPI628821	PB2	China	2015-Feb-12	EPI_ISL_192504	A/Zhejiang/10/2015	WHO Chinese National Influenza Center	WHO Chinese National Influenza Center	Wang,Dayan;Gao,Rongbao;Yang,Lei;Zhou,Shumei;Li,Xiyan;Zhou,Jianfang;Zhu,Wenfei;Guo,Junfeng;Li,Xiaodan;Dong,Jie;Huang,Weijuan;Zhang,Ye;Dong,Libo;Zhao,Xiang;Lu,Jian;Lan,Yu;Shu,Yuelong
EPI628813	PB2	China	2015-Mar-03	EPI_ISL_192503	A/Zhejiang/11/2015	WHO Chinese National Influenza Center	WHO Chinese National Influenza Center	Wang,Dayan;Gao,Rongbao;Yang,Lei;Zhou,Shumei;Li,Xiyan;Zhou,Jianfang;Zhu,Wenfei;Guo,Junfeng;Li,Xiaodan;Dong,Jie;Huang,Weijuan;Zhang,Ye;Dong,Libo;Zhao,Xiang;Lu,Jian;Lan,Yu;Shu,Yuelong
EPI628805	PB2	China	2015-Feb-02	EPI_ISL_192502	A/Fujian/27/2015	WHO Chinese National Influenza Center	WHO Chinese National Influenza Center	Wang,Dayan;Gao,Rongbao;Yang,Lei;Zhou,Shumei;Li,Xiyan;Zhou,Jianfang;Zhu,Wenfei;Guo,Junfeng;Li,Xiaodan;Dong,Jie;Huang,Weijuan;Zhang,Ye;Dong,Libo;Zhao,Xiang;Lu,Jian;Lan,Yu;Shu,Yuelong
EPI628797	PB2	China	2015-Mar-15	EPI_ISL_192501	A/Fujian/28/2015	WHO Chinese National Influenza Center	WHO Chinese National Influenza Center	Wang,Dayan;Gao,Rongbao;Yang,Lei;Zhou,Shumei;Li,Xiyan;Zhou,Jianfang;Zhu,Wenfei;Guo,Junfeng;Li,Xiaodan;Dong,Jie;Huang,Weijuan;Zhang,Ye;Dong,Libo;Zhao,Xiang;Lu,Jian;Lan,Yu;Shu,Yuelong
EPI628781	PB2	China	2015-Mar-07	EPI_ISL_192499	A/Shandong-Taian/01/2015	WHO Chinese National Influenza Center	WHO Chinese National Influenza Center	Wang,Dayan;Gao,Rongbao;Yang,Lei;Zhou,Shumei;Li,Xiyan;Zhou,Jianfang;Zhu,Wenfei;Guo,Junfeng;Li,Xiaodan;Dong,Jie;Huang,Weijuan;Zhang,Ye;Dong,Libo;Zhao,Xiang;Lu,Jian;Lan,Yu;Shu,Yuelong
EPI628773	PB2	China	2015-Feb-04	EPI_ISL_192498	A/Zhejiang/7/2015	WHO Chinese National Influenza Center	WHO Chinese National Influenza Center	Wang,Dayan;Gao,Rongbao;Yang,Lei;Zhou,Shumei;Li,Xiyan;Zhou,Jianfang;Zhu,Wenfei;Guo,Junfeng;Li,Xiaodan;Dong,Jie;Huang,Weijuan;Zhang,Ye;Dong,Libo;Zhao,Xiang;Lu,Jian;Lan,Yu;Shu,Yuelong
EPI628765	PB2	China	2015-Feb-02	EPI_ISL_192497	A/Zhejiang/8/2015	WHO Chinese National Influenza Center	WHO Chinese National Influenza Center	Wang,Dayan;Gao,Rongbao;Yang,Lei;Zhou,Shumei;Li,Xiyan;Zhou,Jianfang;Zhu,Wenfei;Guo,Junfeng;Li,Xiaodan;Dong,Jie;Huang,Weijuan;Zhang,Ye;Dong,Libo;Zhao,Xiang;Lu,Jian;Lan,Yu;Shu,Yuelong
EPI628749	PB2	China	2015-Feb-26	EPI_ISL_192495	A/Anhui/33225/2015	WHO Chinese National Influenza Center	WHO Chinese National Influenza Center	Wang,Dayan;Gao,Rongbao;Yang,Lei;Zhou,Shumei;Li,Xiyan;Zhou,Jianfang;Zhu,Wenfei;Guo,Junfeng;Li,Xiaodan;Dong,Jie;Huang,Weijuan;Zhang,Ye;Dong,Libo;Zhao,Xiang;Lu,Jian;Lan,Yu;Shu,Yuelong
EPI628741	PB2	China	2015-Mar-05	EPI_ISL_192494	A/Anhui/33224/2015	WHO Chinese National Influenza Center	WHO Chinese National Influenza Center	Wang,Dayan;Gao,Rongbao;Yang,Lei;Zhou,Shumei;Li,Xiyan;Zhou,Jianfang;Zhu,Wenfei;Guo,Junfeng;Li,Xiaodan;Dong,Jie;Huang,Weijuan;Zhang,Ye;Dong,Libo;Zhao,Xiang;Lu,Jian;Lan,Yu;Shu,Yuelong
EPI628733	PB2	China	2015-Mar-02	EPI_ISL_192493	A/Anhui/33223/2015	WHO Chinese National Influenza Center	WHO Chinese National Influenza Center	Wang,Dayan;Gao,Rongbao;Yang,Lei;Zhou,Shumei;Li,Xiyan;Zhou,Jianfang;Zhu,Wenfei;Guo,Junfeng;Li,Xiaodan;Dong,Jie;Huang,Weijuan;Zhang,Ye;Dong,Libo;Zhao,Xiang;Lu,Jian;Lan,Yu;Shu,Yuelong
EPI628725	PB2	China	2015-Apr-08	EPI_ISL_192492	A/Anhui/33228/2015	WHO Chinese National Influenza Center	WHO Chinese National Influenza Center	Wang,Dayan;Gao,Rongbao;Yang,Lei;Zhou,Shumei;Li,Xiyan;Zhou,Jianfang;Zhu,Wenfei;Guo,Junfeng;Li,Xiaodan;Dong,Jie;Huang,Weijuan;Zhang,Ye;Dong,Libo;Zhao,Xiang;Lu,Jian;Lan,Yu;Shu,Yuelong
EPI628693	PB2	China	2015-Jan-25	EPI_ISL_192488	A/Guangdong/15SF055/2015	WHO Chinese National Influenza Center	WHO Chinese National Influenza Center	Wang,Dayan;Gao,Rongbao;Yang,Lei;Zhou,Shumei;Li,Xiyan;Zhou,Jianfang;Zhu,Wenfei;Guo,Junfeng;Li,Xiaodan;Dong,Jie;Huang,Weijuan;Zhang,Ye;Dong,Libo;Zhao,Xiang;Lu,Jian;Lan,Yu;Shu,Yuelong
EPI628685	PB2	China	2015-Jan-22	EPI_ISL_192487	A/Guangdong/15SF054/2015	WHO Chinese National Influenza Center	WHO Chinese National Influenza Center	Wang,Dayan;Gao,Rongbao;Yang,Lei;Zhou,Shumei;Li,Xiyan;Zhou,Jianfang;Zhu,Wenfei;Guo,Junfeng;Li,Xiaodan;Dong,Jie;Huang,Weijuan;Zhang,Ye;Dong,Libo;Zhao,Xiang;Lu,Jian;Lan,Yu;Shu,Yuelong
EPI628661	PB2	China	2015-Feb-23	EPI_ISL_192484	A/Anhui/33227/2015	WHO Chinese National Influenza Center	WHO Chinese National Influenza Center	Wang,Dayan;Gao,Rongbao;Yang,Lei;Zhou,Shumei;Li,Xiyan;Zhou,Jianfang;Zhu,Wenfei;Guo,Junfeng;Li,Xiaodan;Dong,Jie;Huang,Weijuan;Zhang,Ye;Dong,Libo;Zhao,Xiang;Lu,Jian;Lan,Yu;Shu,Yuelong
EPI628613	PB2	China	2015-Apr-22	EPI_ISL_192478	A/Hubei/34007/2015	WHO Chinese National Influenza Center	WHO Chinese National Influenza Center	Wang,Dayan;Gao,Rongbao;Yang,Lei;Zhou,Shumei;Li,Xiyan;Zhou,Jianfang;Zhu,Wenfei;Guo,Junfeng;Li,Xiaodan;Dong,Jie;Huang,Weijuan;Zhang,Ye;Dong,Libo;Zhao,Xiang;Lu,Jian;Lan,Yu;Shu,Yuelong
EPI628565	PB2	China	2015-May-23	EPI_ISL_192472	A/Anhui/40095/2015	WHO Chinese National Influenza Center	WHO Chinese National Influenza Center	Wang,Dayan;Gao,Rongbao;Yang,Lei;Zhou,Shumei;Li,Xiyan;Zhou,Jianfang;Zhu,Wenfei;Guo,Junfeng;Li,Xiaodan;Dong,Jie;Huang,Weijuan;Zhang,Ye;Dong,Libo;Zhao,Xiang;Lu,Jian;Lan,Yu;Shu,Yuelong
EPI628557	PB2	China	2015-May-23	EPI_ISL_192471	A/Anhui/40094/2015	WHO Chinese National Influenza Center	WHO Chinese National Influenza Center	Wang,Dayan;Gao,Rongbao;Yang,Lei;Zhou,Shumei;Li,Xiyan;Zhou,Jianfang;Zhu,Wenfei;Guo,Junfeng;Li,Xiaodan;Dong,Jie;Huang,Weijuan;Zhang,Ye;Dong,Libo;Zhao,Xiang;Lu,Jian;Lan,Yu;Shu,Yuelong
EPI628541	PB2	China	2015-May-26	EPI_ISL_192469	A/Beijing/40610/2015	WHO Chinese National Influenza Center	WHO Chinese National Influenza Center	Wang,Dayan;Gao,Rongbao;Yang,Lei;Zhou,Shumei;Li,Xiyan;Zhou,Jianfang;Zhu,Wenfei;Guo,Junfeng;Li,Xiaodan;Dong,Jie;Huang,Weijuan;Zhang,Ye;Dong,Libo;Zhao,Xiang;Lu,Jian;Lan,Yu;Shu,Yuelong
EPI628517	PB2	China	2013-Nov-30	EPI_ISL_192466	A/Guangdong/24997/2013	WHO Chinese National Influenza Center	WHO Chinese National Influenza Center	Wang,Dayan;Gao,Rongbao;Yang,Lei;Zhou,Shumei;Li,Xiyan;Zhou,Jianfang;Zhu,Wenfei;Guo,Junfeng;Li,Xiaodan;Dong,Jie;Huang,Weijuan;Zhang,Ye;Dong,Libo;Zhao,Xiang;Lu,Jian;Lan,Yu;Shu,Yuelong
EPI628509	PB2	China	2013-Dec-16	EPI_ISL_192465	A/Guangdong/24999/2013	WHO Chinese National Influenza Center	WHO Chinese National Influenza Center	Wang,Dayan;Gao,Rongbao;Yang,Lei;Zhou,Shumei;Li,Xiyan;Zhou,Jianfang;Zhu,Wenfei;Guo,Junfeng;Li,Xiaodan;Dong,Jie;Huang,Weijuan;Zhang,Ye;Dong,Libo;Zhao,Xiang;Lu,Jian;Lan,Yu;Shu,Yuelong
EPI628501	PB2	China	2014-Jan-08	EPI_ISL_192464	A/Guangdong/02620/2014	WHO Chinese National Influenza Center	WHO Chinese National Influenza Center	Wang,Dayan;Gao,Rongbao;Yang,Lei;Zhou,Shumei;Li,Xiyan;Zhou,Jianfang;Zhu,Wenfei;Guo,Junfeng;Li,Xiaodan;Dong,Jie;Huang,Weijuan;Zhang,Ye;Dong,Libo;Zhao,Xiang;Lu,Jian;Lan,Yu;Shu,Yuelong
EPI628493	PB2	China	2014-Jan-04	EPI_ISL_192463	A/Guangdong/02124/2014	WHO Chinese National Influenza Center	WHO Chinese National Influenza Center	Wang,Dayan;Gao,Rongbao;Yang,Lei;Zhou,Shumei;Li,Xiyan;Zhou,Jianfang;Zhu,Wenfei;Guo,Junfeng;Li,Xiaodan;Dong,Jie;Huang,Weijuan;Zhang,Ye;Dong,Libo;Zhao,Xiang;Lu,Jian;Lan,Yu;Shu,Yuelong
EPI628485	PB2	China	2014-Jan-08	EPI_ISL_192462	A/Guangdong/02125/2014	WHO Chinese National Influenza Center	WHO Chinese National Influenza Center	Wang,Dayan;Gao,Rongbao;Yang,Lei;Zhou,Shumei;Li,Xiyan;Zhou,Jianfang;Zhu,Wenfei;Guo,Junfeng;Li,Xiaodan;Dong,Jie;Huang,Weijuan;Zhang,Ye;Dong,Libo;Zhao,Xiang;Lu,Jian;Lan,Yu;Shu,Yuelong
EPI628477	PB2	China	2014-Jan-13	EPI_ISL_192461	A/Guangdong/033/2014	WHO Chinese National Influenza Center	WHO Chinese National Influenza Center	Wang,Dayan;Gao,Rongbao;Yang,Lei;Zhou,Shumei;Li,Xiyan;Zhou,Jianfang;Zhu,Wenfei;Guo,Junfeng;Li,Xiaodan;Dong,Jie;Huang,Weijuan;Zhang,Ye;Dong,Libo;Zhao,Xiang;Lu,Jian;Lan,Yu;Shu,Yuelong
EPI628469	PB2	China	2014-Jan-13	EPI_ISL_192460	A/Guangdong/035/2014	WHO Chinese National Influenza Center	WHO Chinese National Influenza Center	Wang,Dayan;Gao,Rongbao;Yang,Lei;Zhou,Shumei;Li,Xiyan;Zhou,Jianfang;Zhu,Wenfei;Guo,Junfeng;Li,Xiaodan;Dong,Jie;Huang,Weijuan;Zhang,Ye;Dong,Libo;Zhao,Xiang;Lu,Jian;Lan,Yu;Shu,Yuelong
EPI628461	PB2	China	2014-Jan-13	EPI_ISL_192459	A/Guangdong/036/2014	WHO Chinese National Influenza Center	WHO Chinese National Influenza Center	Wang,Dayan;Gao,Rongbao;Yang,Lei;Zhou,Shumei;Li,Xiyan;Zhou,Jianfang;Zhu,Wenfei;Guo,Junfeng;Li,Xiaodan;Dong,Jie;Huang,Weijuan;Zhang,Ye;Dong,Libo;Zhao,Xiang;Lu,Jian;Lan,Yu;Shu,Yuelong
EPI628453	PB2	China	2014-Jan-13	EPI_ISL_192458	A/Guangdong/034/2014	WHO Chinese National Influenza Center	WHO Chinese National Influenza Center	Wang,Dayan;Gao,Rongbao;Yang,Lei;Zhou,Shumei;Li,Xiyan;Zhou,Jianfang;Zhu,Wenfei;Guo,Junfeng;Li,Xiaodan;Dong,Jie;Huang,Weijuan;Zhang,Ye;Dong,Libo;Zhao,Xiang;Lu,Jian;Lan,Yu;Shu,Yuelong
EPI628429	PB2	China	2014-Jan-03	EPI_ISL_192455	A/Shanghai/02619/2014	WHO Chinese National Influenza Center	WHO Chinese National Influenza Center	Wang,Dayan;Gao,Rongbao;Yang,Lei;Zhou,Shumei;Li,Xiyan;Zhou,Jianfang;Zhu,Wenfei;Guo,Junfeng;Li,Xiaodan;Dong,Jie;Huang,Weijuan;Zhang,Ye;Dong,Libo;Zhao,Xiang;Lu,Jian;Lan,Yu;Shu,Yuelong
EPI628421	PB2	China	2014-Jan-14	EPI_ISL_192454	A/Guangdong/037/2014	WHO Chinese National Influenza Center	WHO Chinese National Influenza Center	Wang,Dayan;Gao,Rongbao;Yang,Lei;Zhou,Shumei;Li,Xiyan;Zhou,Jianfang;Zhu,Wenfei;Guo,Junfeng;Li,Xiaodan;Dong,Jie;Huang,Weijuan;Zhang,Ye;Dong,Libo;Zhao,Xiang;Lu,Jian;Lan,Yu;Shu,Yuelong
EPI628397	PB2	China	2014-Jan-14	EPI_ISL_192451	A/Fujian/1/2014	WHO Chinese National Influenza Center	WHO Chinese National Influenza Center	Wang,Dayan;Gao,Rongbao;Yang,Lei;Zhou,Shumei;Li,Xiyan;Zhou,Jianfang;Zhu,Wenfei;Guo,Junfeng;Li,Xiaodan;Dong,Jie;Huang,Weijuan;Zhang,Ye;Dong,Libo;Zhao,Xiang;Lu,Jian;Lan,Yu;Shu,Yuelong
EPI628389	PB2	China	2014-Jan-15	EPI_ISL_192450	A/Fujian/2/2014	WHO Chinese National Influenza Center	WHO Chinese National Influenza Center	Wang,Dayan;Gao,Rongbao;Yang,Lei;Zhou,Shumei;Li,Xiyan;Zhou,Jianfang;Zhu,Wenfei;Guo,Junfeng;Li,Xiaodan;Dong,Jie;Huang,Weijuan;Zhang,Ye;Dong,Libo;Zhao,Xiang;Lu,Jian;Lan,Yu;Shu,Yuelong
EPI628381	PB2	China	2014-Jan-03	EPI_ISL_192449	A/Zhejiang/1/2014	WHO Chinese National Influenza Center	WHO Chinese National Influenza Center	Wang,Dayan;Gao,Rongbao;Yang,Lei;Zhou,Shumei;Li,Xiyan;Zhou,Jianfang;Zhu,Wenfei;Guo,Junfeng;Li,Xiaodan;Dong,Jie;Huang,Weijuan;Zhang,Ye;Dong,Libo;Zhao,Xiang;Lu,Jian;Lan,Yu;Shu,Yuelong
EPI628373	PB2	China	2014-Jan-09	EPI_ISL_192448	A/Zhejiang/2/2014	WHO Chinese National Influenza Center	WHO Chinese National Influenza Center	Wang,Dayan;Gao,Rongbao;Yang,Lei;Zhou,Shumei;Li,Xiyan;Zhou,Jianfang;Zhu,Wenfei;Guo,Junfeng;Li,Xiaodan;Dong,Jie;Huang,Weijuan;Zhang,Ye;Dong,Libo;Zhao,Xiang;Lu,Jian;Lan,Yu;Shu,Yuelong
EPI628365	PB2	China	2014-Jan-09	EPI_ISL_192447	A/Zhejiang/3/2014	WHO Chinese National Influenza Center	WHO Chinese National Influenza Center	Wang,Dayan;Gao,Rongbao;Yang,Lei;Zhou,Shumei;Li,Xiyan;Zhou,Jianfang;Zhu,Wenfei;Guo,Junfeng;Li,Xiaodan;Dong,Jie;Huang,Weijuan;Zhang,Ye;Dong,Libo;Zhao,Xiang;Lu,Jian;Lan,Yu;Shu,Yuelong
EPI628357	PB2	China	2014-Jan-11	EPI_ISL_192446	A/Zhejiang/4/2014	WHO Chinese National Influenza Center	WHO Chinese National Influenza Center	Wang,Dayan;Gao,Rongbao;Yang,Lei;Zhou,Shumei;Li,Xiyan;Zhou,Jianfang;Zhu,Wenfei;Guo,Junfeng;Li,Xiaodan;Dong,Jie;Huang,Weijuan;Zhang,Ye;Dong,Libo;Zhao,Xiang;Lu,Jian;Lan,Yu;Shu,Yuelong
EPI628349	PB2	China	2014-Jan-08	EPI_ISL_192445	A/Zhejiang/5/2014	WHO Chinese National Influenza Center	WHO Chinese National Influenza Center	Wang,Dayan;Gao,Rongbao;Yang,Lei;Zhou,Shumei;Li,Xiyan;Zhou,Jianfang;Zhu,Wenfei;Guo,Junfeng;Li,Xiaodan;Dong,Jie;Huang,Weijuan;Zhang,Ye;Dong,Libo;Zhao,Xiang;Lu,Jian;Lan,Yu;Shu,Yuelong
EPI628341	PB2	China	2014-Jan-15	EPI_ISL_192444	A/Zhejiang/6/2014	WHO Chinese National Influenza Center	WHO Chinese National Influenza Center	Wang,Dayan;Gao,Rongbao;Yang,Lei;Zhou,Shumei;Li,Xiyan;Zhou,Jianfang;Zhu,Wenfei;Guo,Junfeng;Li,Xiaodan;Dong,Jie;Huang,Weijuan;Zhang,Ye;Dong,Libo;Zhao,Xiang;Lu,Jian;Lan,Yu;Shu,Yuelong
EPI628333	PB2	China	2014-Jan-23	EPI_ISL_192443	A/Zhejiang/07800/2014	WHO Chinese National Influenza Center	WHO Chinese National Influenza Center	Wang,Dayan;Gao,Rongbao;Yang,Lei;Zhou,Shumei;Li,Xiyan;Zhou,Jianfang;Zhu,Wenfei;Guo,Junfeng;Li,Xiaodan;Dong,Jie;Huang,Weijuan;Zhang,Ye;Dong,Libo;Zhao,Xiang;Lu,Jian;Lan,Yu;Shu,Yuelong
EPI628325	PB2	China	2014-Jan-23	EPI_ISL_192442	A/Zhejiang/07801/2014	WHO Chinese National Influenza Center	WHO Chinese National Influenza Center	Wang,Dayan;Gao,Rongbao;Yang,Lei;Zhou,Shumei;Li,Xiyan;Zhou,Jianfang;Zhu,Wenfei;Guo,Junfeng;Li,Xiaodan;Dong,Jie;Huang,Weijuan;Zhang,Ye;Dong,Libo;Zhao,Xiang;Lu,Jian;Lan,Yu;Shu,Yuelong
EPI628317	PB2	China	2014-Jan-20	EPI_ISL_192441	A/Zhejiang/07802/2014	WHO Chinese National Influenza Center	WHO Chinese National Influenza Center	Wang,Dayan;Gao,Rongbao;Yang,Lei;Zhou,Shumei;Li,Xiyan;Zhou,Jianfang;Zhu,Wenfei;Guo,Junfeng;Li,Xiaodan;Dong,Jie;Huang,Weijuan;Zhang,Ye;Dong,Libo;Zhao,Xiang;Lu,Jian;Lan,Yu;Shu,Yuelong
EPI628309	PB2	China	2014-Jan-23	EPI_ISL_192440	A/Zhejiang/07803/2014	WHO Chinese National Influenza Center	WHO Chinese National Influenza Center	Wang,Dayan;Gao,Rongbao;Yang,Lei;Zhou,Shumei;Li,Xiyan;Zhou,Jianfang;Zhu,Wenfei;Guo,Junfeng;Li,Xiaodan;Dong,Jie;Huang,Weijuan;Zhang,Ye;Dong,Libo;Zhao,Xiang;Lu,Jian;Lan,Yu;Shu,Yuelong
EPI628301	PB2	China	2014-Jan-19	EPI_ISL_192439	A/Zhejiang/07807/2014	WHO Chinese National Influenza Center	WHO Chinese National Influenza Center	Wang,Dayan;Gao,Rongbao;Yang,Lei;Zhou,Shumei;Li,Xiyan;Zhou,Jianfang;Zhu,Wenfei;Guo,Junfeng;Li,Xiaodan;Dong,Jie;Huang,Weijuan;Zhang,Ye;Dong,Libo;Zhao,Xiang;Lu,Jian;Lan,Yu;Shu,Yuelong
EPI628293	PB2	China	2014-Feb-02	EPI_ISL_192438	A/Hunan/08963/2014	WHO Chinese National Influenza Center	WHO Chinese National Influenza Center	Wang,Dayan;Gao,Rongbao;Yang,Lei;Zhou,Shumei;Li,Xiyan;Zhou,Jianfang;Zhu,Wenfei;Guo,Junfeng;Li,Xiaodan;Dong,Jie;Huang,Weijuan;Zhang,Ye;Dong,Libo;Zhao,Xiang;Lu,Jian;Lan,Yu;Shu,Yuelong
EPI628277	PB2	China	2014-Jan-27	EPI_ISL_192436	A/Hunan/07833/2014	WHO Chinese National Influenza Center	WHO Chinese National Influenza Center	Wang,Dayan;Gao,Rongbao;Yang,Lei;Zhou,Shumei;Li,Xiyan;Zhou,Jianfang;Zhu,Wenfei;Guo,Junfeng;Li,Xiaodan;Dong,Jie;Huang,Weijuan;Zhang,Ye;Dong,Libo;Zhao,Xiang;Lu,Jian;Lan,Yu;Shu,Yuelong
EPI628269	PB2	China	2014-Jan-16	EPI_ISL_192435	A/Fujian/3/2014	WHO Chinese National Influenza Center	WHO Chinese National Influenza Center	Wang,Dayan;Gao,Rongbao;Yang,Lei;Zhou,Shumei;Li,Xiyan;Zhou,Jianfang;Zhu,Wenfei;Guo,Junfeng;Li,Xiaodan;Dong,Jie;Huang,Weijuan;Zhang,Ye;Dong,Libo;Zhao,Xiang;Lu,Jian;Lan,Yu;Shu,Yuelong
EPI628245	PB2	China	2014-Jan-20	EPI_ISL_192432	A/Jiangsu/09041/2014	WHO Chinese National Influenza Center	WHO Chinese National Influenza Center	Wang,Dayan;Gao,Rongbao;Yang,Lei;Zhou,Shumei;Li,Xiyan;Zhou,Jianfang;Zhu,Wenfei;Guo,Junfeng;Li,Xiaodan;Dong,Jie;Huang,Weijuan;Zhang,Ye;Dong,Libo;Zhao,Xiang;Lu,Jian;Lan,Yu;Shu,Yuelong
EPI628237	PB2	China	2014-Jan-26	EPI_ISL_192431	A/Jiangsu/09043/2014	WHO Chinese National Influenza Center	WHO Chinese National Influenza Center	Wang,Dayan;Gao,Rongbao;Yang,Lei;Zhou,Shumei;Li,Xiyan;Zhou,Jianfang;Zhu,Wenfei;Guo,Junfeng;Li,Xiaodan;Dong,Jie;Huang,Weijuan;Zhang,Ye;Dong,Libo;Zhao,Xiang;Lu,Jian;Lan,Yu;Shu,Yuelong
EPI628229	PB2	China	2014-Feb-05	EPI_ISL_192430	A/Jiangsu/09049/2014	WHO Chinese National Influenza Center	WHO Chinese National Influenza Center	Wang,Dayan;Gao,Rongbao;Yang,Lei;Zhou,Shumei;Li,Xiyan;Zhou,Jianfang;Zhu,Wenfei;Guo,Junfeng;Li,Xiaodan;Dong,Jie;Huang,Weijuan;Zhang,Ye;Dong,Libo;Zhao,Xiang;Lu,Jian;Lan,Yu;Shu,Yuelong
EPI628221	PB2	China	2014-Jan-26	EPI_ISL_192429	A/Fujian/6/2014	WHO Chinese National Influenza Center	WHO Chinese National Influenza Center	Wang,Dayan;Gao,Rongbao;Yang,Lei;Zhou,Shumei;Li,Xiyan;Zhou,Jianfang;Zhu,Wenfei;Guo,Junfeng;Li,Xiaodan;Dong,Jie;Huang,Weijuan;Zhang,Ye;Dong,Libo;Zhao,Xiang;Lu,Jian;Lan,Yu;Shu,Yuelong
EPI628213	PB2	China	2014-Jan-27	EPI_ISL_192428	A/Fujian/7/2014	WHO Chinese National Influenza Center	WHO Chinese National Influenza Center	Wang,Dayan;Gao,Rongbao;Yang,Lei;Zhou,Shumei;Li,Xiyan;Zhou,Jianfang;Zhu,Wenfei;Guo,Junfeng;Li,Xiaodan;Dong,Jie;Huang,Weijuan;Zhang,Ye;Dong,Libo;Zhao,Xiang;Lu,Jian;Lan,Yu;Shu,Yuelong
EPI628205	PB2	China	2014-Feb-03	EPI_ISL_192427	A/Fujian/8/2014	WHO Chinese National Influenza Center	WHO Chinese National Influenza Center	Wang,Dayan;Gao,Rongbao;Yang,Lei;Zhou,Shumei;Li,Xiyan;Zhou,Jianfang;Zhu,Wenfei;Guo,Junfeng;Li,Xiaodan;Dong,Jie;Huang,Weijuan;Zhang,Ye;Dong,Libo;Zhao,Xiang;Lu,Jian;Lan,Yu;Shu,Yuelong
EPI628197	PB2	China	2014-Jan-13	EPI_ISL_192426	A/Fujian/9/2014	WHO Chinese National Influenza Center	WHO Chinese National Influenza Center	Wang,Dayan;Gao,Rongbao;Yang,Lei;Zhou,Shumei;Li,Xiyan;Zhou,Jianfang;Zhu,Wenfei;Guo,Junfeng;Li,Xiaodan;Dong,Jie;Huang,Weijuan;Zhang,Ye;Dong,Libo;Zhao,Xiang;Lu,Jian;Lan,Yu;Shu,Yuelong
EPI628189	PB2	China	2014-Jan-07	EPI_ISL_192425	A/Jiangsu/09389/2014	WHO Chinese National Influenza Center	WHO Chinese National Influenza Center	Wang,Dayan;Gao,Rongbao;Yang,Lei;Zhou,Shumei;Li,Xiyan;Zhou,Jianfang;Zhu,Wenfei;Guo,Junfeng;Li,Xiaodan;Dong,Jie;Huang,Weijuan;Zhang,Ye;Dong,Libo;Zhao,Xiang;Lu,Jian;Lan,Yu;Shu,Yuelong
EPI628181	PB2	China	2014-Feb-05	EPI_ISL_192424	A/Hunan/09193/2014	WHO Chinese National Influenza Center	WHO Chinese National Influenza Center	Wang,Dayan;Gao,Rongbao;Yang,Lei;Zhou,Shumei;Li,Xiyan;Zhou,Jianfang;Zhu,Wenfei;Guo,Junfeng;Li,Xiaodan;Dong,Jie;Huang,Weijuan;Zhang,Ye;Dong,Libo;Zhao,Xiang;Lu,Jian;Lan,Yu;Shu,Yuelong
EPI628173	PB2	China	2014-Jan-26	EPI_ISL_192423	A/Fujian/11/2014	WHO Chinese National Influenza Center	WHO Chinese National Influenza Center	Wang,Dayan;Gao,Rongbao;Yang,Lei;Zhou,Shumei;Li,Xiyan;Zhou,Jianfang;Zhu,Wenfei;Guo,Junfeng;Li,Xiaodan;Dong,Jie;Huang,Weijuan;Zhang,Ye;Dong,Libo;Zhao,Xiang;Lu,Jian;Lan,Yu;Shu,Yuelong
EPI628165	PB2	China	2014-Jan-31	EPI_ISL_192422	A/Fujian/12/2014	WHO Chinese National Influenza Center	WHO Chinese National Influenza Center	Wang,Dayan;Gao,Rongbao;Yang,Lei;Zhou,Shumei;Li,Xiyan;Zhou,Jianfang;Zhu,Wenfei;Guo,Junfeng;Li,Xiaodan;Dong,Jie;Huang,Weijuan;Zhang,Ye;Dong,Libo;Zhao,Xiang;Lu,Jian;Lan,Yu;Shu,Yuelong
EPI628157	PB2	China	2014-Feb-02	EPI_ISL_192421	A/Fujian/13/2014	WHO Chinese National Influenza Center	WHO Chinese National Influenza Center	Wang,Dayan;Gao,Rongbao;Yang,Lei;Zhou,Shumei;Li,Xiyan;Zhou,Jianfang;Zhu,Wenfei;Guo,Junfeng;Li,Xiaodan;Dong,Jie;Huang,Weijuan;Zhang,Ye;Dong,Libo;Zhao,Xiang;Lu,Jian;Lan,Yu;Shu,Yuelong
EPI628149	PB2	China	2014-Feb-05	EPI_ISL_192420	A/Fujian/14/2014	WHO Chinese National Influenza Center	WHO Chinese National Influenza Center	Wang,Dayan;Gao,Rongbao;Yang,Lei;Zhou,Shumei;Li,Xiyan;Zhou,Jianfang;Zhu,Wenfei;Guo,Junfeng;Li,Xiaodan;Dong,Jie;Huang,Weijuan;Zhang,Ye;Dong,Libo;Zhao,Xiang;Lu,Jian;Lan,Yu;Shu,Yuelong
EPI628141	PB2	China	2014-Feb-17	EPI_ISL_192419	A/Hunan/12173/2014	WHO Chinese National Influenza Center	WHO Chinese National Influenza Center	Wang,Dayan;Gao,Rongbao;Yang,Lei;Zhou,Shumei;Li,Xiyan;Zhou,Jianfang;Zhu,Wenfei;Guo,Junfeng;Li,Xiaodan;Dong,Jie;Huang,Weijuan;Zhang,Ye;Dong,Libo;Zhao,Xiang;Lu,Jian;Lan,Yu;Shu,Yuelong
EPI628133	PB2	China	2014-Feb-16	EPI_ISL_192418	A/Hunan/12172/2014	WHO Chinese National Influenza Center	WHO Chinese National Influenza Center	Wang,Dayan;Gao,Rongbao;Yang,Lei;Zhou,Shumei;Li,Xiyan;Zhou,Jianfang;Zhu,Wenfei;Guo,Junfeng;Li,Xiaodan;Dong,Jie;Huang,Weijuan;Zhang,Ye;Dong,Libo;Zhao,Xiang;Lu,Jian;Lan,Yu;Shu,Yuelong
EPI628125	PB2	China	2014-Jan-12	EPI_ISL_192417	A/Guangdong/0031/2014	WHO Chinese National Influenza Center	WHO Chinese National Influenza Center	Wang,Dayan;Gao,Rongbao;Yang,Lei;Zhou,Shumei;Li,Xiyan;Zhou,Jianfang;Zhu,Wenfei;Guo,Junfeng;Li,Xiaodan;Dong,Jie;Huang,Weijuan;Zhang,Ye;Dong,Libo;Zhao,Xiang;Lu,Jian;Lan,Yu;Shu,Yuelong
EPI628117	PB2	China	2014-Jan-09	EPI_ISL_192416	A/Guangdong/0029/2014	WHO Chinese National Influenza Center	WHO Chinese National Influenza Center	Wang,Dayan;Gao,Rongbao;Yang,Lei;Zhou,Shumei;Li,Xiyan;Zhou,Jianfang;Zhu,Wenfei;Guo,Junfeng;Li,Xiaodan;Dong,Jie;Huang,Weijuan;Zhang,Ye;Dong,Libo;Zhao,Xiang;Lu,Jian;Lan,Yu;Shu,Yuelong
EPI628109	PB2	China	2014-Jan-11	EPI_ISL_192415	A/Guangdong/0026/2014	WHO Chinese National Influenza Center	WHO Chinese National Influenza Center	Wang,Dayan;Gao,Rongbao;Yang,Lei;Zhou,Shumei;Li,Xiyan;Zhou,Jianfang;Zhu,Wenfei;Guo,Junfeng;Li,Xiaodan;Dong,Jie;Huang,Weijuan;Zhang,Ye;Dong,Libo;Zhao,Xiang;Lu,Jian;Lan,Yu;Shu,Yuelong
EPI628101	PB2	China	2014-Jan-08	EPI_ISL_192414	A/Guangdong/0019/2014	WHO Chinese National Influenza Center	WHO Chinese National Influenza Center	Wang,Dayan;Gao,Rongbao;Yang,Lei;Zhou,Shumei;Li,Xiyan;Zhou,Jianfang;Zhu,Wenfei;Guo,Junfeng;Li,Xiaodan;Dong,Jie;Huang,Weijuan;Zhang,Ye;Dong,Libo;Zhao,Xiang;Lu,Jian;Lan,Yu;Shu,Yuelong
EPI628093	PB2	China	2014-Jan-04	EPI_ISL_192413	A/Guangdong/0012/2014	WHO Chinese National Influenza Center	WHO Chinese National Influenza Center	Wang,Dayan;Gao,Rongbao;Yang,Lei;Zhou,Shumei;Li,Xiyan;Zhou,Jianfang;Zhu,Wenfei;Guo,Junfeng;Li,Xiaodan;Dong,Jie;Huang,Weijuan;Zhang,Ye;Dong,Libo;Zhao,Xiang;Lu,Jian;Lan,Yu;Shu,Yuelong
EPI628085	PB2	China	2014-Feb-06	EPI_ISL_192412	A/Beijing/09149/2014	WHO Chinese National Influenza Center	WHO Chinese National Influenza Center	Wang,Dayan;Gao,Rongbao;Yang,Lei;Zhou,Shumei;Li,Xiyan;Zhou,Jianfang;Zhu,Wenfei;Guo,Junfeng;Li,Xiaodan;Dong,Jie;Huang,Weijuan;Zhang,Ye;Dong,Libo;Zhao,Xiang;Lu,Jian;Lan,Yu;Shu,Yuelong
EPI628077	PB2	China	2014-Jan-24	EPI_ISL_192411	A/Fujian/5/2014	WHO Chinese National Influenza Center	WHO Chinese National Influenza Center	Wang,Dayan;Gao,Rongbao;Yang,Lei;Zhou,Shumei;Li,Xiyan;Zhou,Jianfang;Zhu,Wenfei;Guo,Junfeng;Li,Xiaodan;Dong,Jie;Huang,Weijuan;Zhang,Ye;Dong,Libo;Zhao,Xiang;Lu,Jian;Lan,Yu;Shu,Yuelong
EPI628069	PB2	China	2014-Feb-07	EPI_ISL_192410	A/Anhui/09188/2014	WHO Chinese National Influenza Center	WHO Chinese National Influenza Center	Wang,Dayan;Gao,Rongbao;Yang,Lei;Zhou,Shumei;Li,Xiyan;Zhou,Jianfang;Zhu,Wenfei;Guo,Junfeng;Li,Xiaodan;Dong,Jie;Huang,Weijuan;Zhang,Ye;Dong,Libo;Zhao,Xiang;Lu,Jian;Lan,Yu;Shu,Yuelong
EPI628061	PB2	China	2014-Feb-11	EPI_ISL_192409	A/Hunan/09191/2014	WHO Chinese National Influenza Center	WHO Chinese National Influenza Center	Wang,Dayan;Gao,Rongbao;Yang,Lei;Zhou,Shumei;Li,Xiyan;Zhou,Jianfang;Zhu,Wenfei;Guo,Junfeng;Li,Xiaodan;Dong,Jie;Huang,Weijuan;Zhang,Ye;Dong,Libo;Zhao,Xiang;Lu,Jian;Lan,Yu;Shu,Yuelong
EPI628053	PB2	China	2014-Feb-07	EPI_ISL_192408	A/Jiangsu/09387/2014	WHO Chinese National Influenza Center	WHO Chinese National Influenza Center	Wang,Dayan;Gao,Rongbao;Yang,Lei;Zhou,Shumei;Li,Xiyan;Zhou,Jianfang;Zhu,Wenfei;Guo,Junfeng;Li,Xiaodan;Dong,Jie;Huang,Weijuan;Zhang,Ye;Dong,Libo;Zhao,Xiang;Lu,Jian;Lan,Yu;Shu,Yuelong
EPI628045	PB2	China	2014-Feb-13	EPI_ISL_192407	A/Anhui/09212/2014	WHO Chinese National Influenza Center	WHO Chinese National Influenza Center	Wang,Dayan;Gao,Rongbao;Yang,Lei;Zhou,Shumei;Li,Xiyan;Zhou,Jianfang;Zhu,Wenfei;Guo,Junfeng;Li,Xiaodan;Dong,Jie;Huang,Weijuan;Zhang,Ye;Dong,Libo;Zhao,Xiang;Lu,Jian;Lan,Yu;Shu,Yuelong
EPI628037	PB2	China	2014-Feb-15	EPI_ISL_192406	A/Anhui/09214/2014	WHO Chinese National Influenza Center	WHO Chinese National Influenza Center	Wang,Dayan;Gao,Rongbao;Yang,Lei;Zhou,Shumei;Li,Xiyan;Zhou,Jianfang;Zhu,Wenfei;Guo,Junfeng;Li,Xiaodan;Dong,Jie;Huang,Weijuan;Zhang,Ye;Dong,Libo;Zhao,Xiang;Lu,Jian;Lan,Yu;Shu,Yuelong
EPI628029	PB2	China	2014-Feb-07	EPI_ISL_192405	A/Anhui/09186/2014	WHO Chinese National Influenza Center	WHO Chinese National Influenza Center	Wang,Dayan;Gao,Rongbao;Yang,Lei;Zhou,Shumei;Li,Xiyan;Zhou,Jianfang;Zhu,Wenfei;Guo,Junfeng;Li,Xiaodan;Dong,Jie;Huang,Weijuan;Zhang,Ye;Dong,Libo;Zhao,Xiang;Lu,Jian;Lan,Yu;Shu,Yuelong
EPI628013	PB2	China	2014-Jan-30	EPI_ISL_192403	A/Guangdong/0075/2014	WHO Chinese National Influenza Center	WHO Chinese National Influenza Center	Wang,Dayan;Gao,Rongbao;Yang,Lei;Zhou,Shumei;Li,Xiyan;Zhou,Jianfang;Zhu,Wenfei;Guo,Junfeng;Li,Xiaodan;Dong,Jie;Huang,Weijuan;Zhang,Ye;Dong,Libo;Zhao,Xiang;Lu,Jian;Lan,Yu;Shu,Yuelong
EPI628005	PB2	China	2014-Jan-20	EPI_ISL_192402	A/Guangdong/0048/2014	WHO Chinese National Influenza Center	WHO Chinese National Influenza Center	Wang,Dayan;Gao,Rongbao;Yang,Lei;Zhou,Shumei;Li,Xiyan;Zhou,Jianfang;Zhu,Wenfei;Guo,Junfeng;Li,Xiaodan;Dong,Jie;Huang,Weijuan;Zhang,Ye;Dong,Libo;Zhao,Xiang;Lu,Jian;Lan,Yu;Shu,Yuelong
EPI627997	PB2	China	2014-Jan-29	EPI_ISL_192401	A/Guangdong/0065/2014	WHO Chinese National Influenza Center	WHO Chinese National Influenza Center	Wang,Dayan;Gao,Rongbao;Yang,Lei;Zhou,Shumei;Li,Xiyan;Zhou,Jianfang;Zhu,Wenfei;Guo,Junfeng;Li,Xiaodan;Dong,Jie;Huang,Weijuan;Zhang,Ye;Dong,Libo;Zhao,Xiang;Lu,Jian;Lan,Yu;Shu,Yuelong
EPI627989	PB2	China	2014-Jan-30	EPI_ISL_192400	A/Guangdong/0071/2014	WHO Chinese National Influenza Center	WHO Chinese National Influenza Center	Wang,Dayan;Gao,Rongbao;Yang,Lei;Zhou,Shumei;Li,Xiyan;Zhou,Jianfang;Zhu,Wenfei;Guo,Junfeng;Li,Xiaodan;Dong,Jie;Huang,Weijuan;Zhang,Ye;Dong,Libo;Zhao,Xiang;Lu,Jian;Lan,Yu;Shu,Yuelong
EPI627973	PB2	China	2014-Jan-31	EPI_ISL_192398	A/Guangdong/0081/2014	WHO Chinese National Influenza Center	WHO Chinese National Influenza Center	Wang,Dayan;Gao,Rongbao;Yang,Lei;Zhou,Shumei;Li,Xiyan;Zhou,Jianfang;Zhu,Wenfei;Guo,Junfeng;Li,Xiaodan;Dong,Jie;Huang,Weijuan;Zhang,Ye;Dong,Libo;Zhao,Xiang;Lu,Jian;Lan,Yu;Shu,Yuelong
EPI627965	PB2	China	2014-Jan-30	EPI_ISL_192397	A/Guangdong/0074/2014	WHO Chinese National Influenza Center	WHO Chinese National Influenza Center	Wang,Dayan;Gao,Rongbao;Yang,Lei;Zhou,Shumei;Li,Xiyan;Zhou,Jianfang;Zhu,Wenfei;Guo,Junfeng;Li,Xiaodan;Dong,Jie;Huang,Weijuan;Zhang,Ye;Dong,Libo;Zhao,Xiang;Lu,Jian;Lan,Yu;Shu,Yuelong
EPI627949	PB2	China	2014-Jan-30	EPI_ISL_192395	A/Guangdong/0069/2014	WHO Chinese National Influenza Center	WHO Chinese National Influenza Center	Wang,Dayan;Gao,Rongbao;Yang,Lei;Zhou,Shumei;Li,Xiyan;Zhou,Jianfang;Zhu,Wenfei;Guo,Junfeng;Li,Xiaodan;Dong,Jie;Huang,Weijuan;Zhang,Ye;Dong,Libo;Zhao,Xiang;Lu,Jian;Lan,Yu;Shu,Yuelong
EPI627941	PB2	China	2014-Jan-29	EPI_ISL_192394	A/Guangdong/0066/2014	WHO Chinese National Influenza Center	WHO Chinese National Influenza Center	Wang,Dayan;Gao,Rongbao;Yang,Lei;Zhou,Shumei;Li,Xiyan;Zhou,Jianfang;Zhu,Wenfei;Guo,Junfeng;Li,Xiaodan;Dong,Jie;Huang,Weijuan;Zhang,Ye;Dong,Libo;Zhao,Xiang;Lu,Jian;Lan,Yu;Shu,Yuelong
EPI627933	PB2	China	2014-Jan-17	EPI_ISL_192393	A/Guangdong/0046/2014	WHO Chinese National Influenza Center	WHO Chinese National Influenza Center	Wang,Dayan;Gao,Rongbao;Yang,Lei;Zhou,Shumei;Li,Xiyan;Zhou,Jianfang;Zhu,Wenfei;Guo,Junfeng;Li,Xiaodan;Dong,Jie;Huang,Weijuan;Zhang,Ye;Dong,Libo;Zhao,Xiang;Lu,Jian;Lan,Yu;Shu,Yuelong
EPI627925	PB2	China	2014-Feb-26	EPI_ISL_192392	A/Fujian/15/2014	WHO Chinese National Influenza Center	WHO Chinese National Influenza Center	Wang,Dayan;Gao,Rongbao;Yang,Lei;Zhou,Shumei;Li,Xiyan;Zhou,Jianfang;Zhu,Wenfei;Guo,Junfeng;Li,Xiaodan;Dong,Jie;Huang,Weijuan;Zhang,Ye;Dong,Libo;Zhao,Xiang;Lu,Jian;Lan,Yu;Shu,Yuelong
EPI627917	PB2	China	2014-Jul-25	EPI_ISL_192391	A/Xinjiang/73030/2014	WHO Chinese National Influenza Center	WHO Chinese National Influenza Center	Wang,Dayan;Gao,Rongbao;Yang,Lei;Zhou,Shumei;Li,Xiyan;Zhou,Jianfang;Zhu,Wenfei;Guo,Junfeng;Li,Xiaodan;Dong,Jie;Huang,Weijuan;Zhang,Ye;Dong,Libo;Zhao,Xiang;Lu,Jian;Lan,Yu;Shu,Yuelong
EPI627861	PB2	China	2014-Mar-04	EPI_ISL_192384	A/Shandong/02/2014	WHO Chinese National Influenza Center	WHO Chinese National Influenza Center	Wang,Dayan;Gao,Rongbao;Yang,Lei;Zhou,Shumei;Li,Xiyan;Zhou,Jianfang;Zhu,Wenfei;Guo,Junfeng;Li,Xiaodan;Dong,Jie;Huang,Weijuan;Zhang,Ye;Dong,Libo;Zhao,Xiang;Lu,Jian;Lan,Yu;Shu,Yuelong
EPI627853	PB2	China	2014-Apr-19	EPI_ISL_192383	A/Hunan/26938/2014	WHO Chinese National Influenza Center	WHO Chinese National Influenza Center	Wang,Dayan;Gao,Rongbao;Yang,Lei;Zhou,Shumei;Li,Xiyan;Zhou,Jianfang;Zhu,Wenfei;Guo,Junfeng;Li,Xiaodan;Dong,Jie;Huang,Weijuan;Zhang,Ye;Dong,Libo;Zhao,Xiang;Lu,Jian;Lan,Yu;Shu,Yuelong
EPI627845	PB2	China	2014-Apr-19	EPI_ISL_192382	A/Hunan/26937/2014	WHO Chinese National Influenza Center	WHO Chinese National Influenza Center	Wang,Dayan;Gao,Rongbao;Yang,Lei;Zhou,Shumei;Li,Xiyan;Zhou,Jianfang;Zhu,Wenfei;Guo,Junfeng;Li,Xiaodan;Dong,Jie;Huang,Weijuan;Zhang,Ye;Dong,Libo;Zhao,Xiang;Lu,Jian;Lan,Yu;Shu,Yuelong
EPI627837	PB2	China	2014-Apr-21	EPI_ISL_192381	A/Jiangxi/27569/2014	WHO Chinese National Influenza Center	WHO Chinese National Influenza Center	Wang,Dayan;Gao,Rongbao;Yang,Lei;Zhou,Shumei;Li,Xiyan;Zhou,Jianfang;Zhu,Wenfei;Guo,Junfeng;Li,Xiaodan;Dong,Jie;Huang,Weijuan;Zhang,Ye;Dong,Libo;Zhao,Xiang;Lu,Jian;Lan,Yu;Shu,Yuelong
EPI627829	PB2	China	2014-Aug-15	EPI_ISL_192380	A/Xinjiang/75802/2014	WHO Chinese National Influenza Center	WHO Chinese National Influenza Center	Wang,Dayan;Gao,Rongbao;Yang,Lei;Zhou,Shumei;Li,Xiyan;Zhou,Jianfang;Zhu,Wenfei;Guo,Junfeng;Li,Xiaodan;Dong,Jie;Huang,Weijuan;Zhang,Ye;Dong,Libo;Zhao,Xiang;Lu,Jian;Lan,Yu;Shu,Yuelong
EPI627805	PB2	China	2014-May-22	EPI_ISL_192377	A/Shandong/01/2014	WHO Chinese National Influenza Center	WHO Chinese National Influenza Center	Wang,Dayan;Gao,Rongbao;Yang,Lei;Zhou,Shumei;Li,Xiyan;Zhou,Jianfang;Zhu,Wenfei;Guo,Junfeng;Li,Xiaodan;Dong,Jie;Huang,Weijuan;Zhang,Ye;Dong,Libo;Zhao,Xiang;Lu,Jian;Lan,Yu;Shu,Yuelong
EPI627797	PB2	China	2014-Feb-11	EPI_ISL_192376	A/Guangdong-Guangzhou/XN06839/2014	WHO Chinese National Influenza Center	WHO Chinese National Influenza Center	Wang,Dayan;Gao,Rongbao;Yang,Lei;Zhou,Shumei;Li,Xiyan;Zhou,Jianfang;Zhu,Wenfei;Guo,Junfeng;Li,Xiaodan;Dong,Jie;Huang,Weijuan;Zhang,Ye;Dong,Libo;Zhao,Xiang;Lu,Jian;Lan,Yu;Shu,Yuelong
EPI627789	PB2	China	2014-Jan-16	EPI_ISL_192375	A/Guangdong-Guangzhou/XN02933/2014	WHO Chinese National Influenza Center	WHO Chinese National Influenza Center	Wang,Dayan;Gao,Rongbao;Yang,Lei;Zhou,Shumei;Li,Xiyan;Zhou,Jianfang;Zhu,Wenfei;Guo,Junfeng;Li,Xiaodan;Dong,Jie;Huang,Weijuan;Zhang,Ye;Dong,Libo;Zhao,Xiang;Lu,Jian;Lan,Yu;Shu,Yuelong
EPI627774	PB2	China	2014-Jan-29	EPI_ISL_192373	A/Guangdong-Guangzhou/XN05586/2014	WHO Chinese National Influenza Center	WHO Chinese National Influenza Center	Wang,Dayan;Gao,Rongbao;Yang,Lei;Zhou,Shumei;Li,Xiyan;Zhou,Jianfang;Zhu,Wenfei;Guo,Junfeng;Li,Xiaodan;Dong,Jie;Huang,Weijuan;Zhang,Ye;Dong,Libo;Zhao,Xiang;Lu,Jian;Lan,Yu;Shu,Yuelong
EPI627766	PB2	China	2014-Feb-02	EPI_ISL_192372	A/Guangdong-Guangzhou/XN00298/2014	WHO Chinese National Influenza Center	WHO Chinese National Influenza Center	Wang,Dayan;Gao,Rongbao;Yang,Lei;Zhou,Shumei;Li,Xiyan;Zhou,Jianfang;Zhu,Wenfei;Guo,Junfeng;Li,Xiaodan;Dong,Jie;Huang,Weijuan;Zhang,Ye;Dong,Libo;Zhao,Xiang;Lu,Jian;Lan,Yu;Shu,Yuelong
EPI627758	PB2	China	2014-Feb-05	EPI_ISL_192371	A/Guangdong-Guangzhou/XN00429/2014	WHO Chinese National Influenza Center	WHO Chinese National Influenza Center	Wang,Dayan;Gao,Rongbao;Yang,Lei;Zhou,Shumei;Li,Xiyan;Zhou,Jianfang;Zhu,Wenfei;Guo,Junfeng;Li,Xiaodan;Dong,Jie;Huang,Weijuan;Zhang,Ye;Dong,Libo;Zhao,Xiang;Lu,Jian;Lan,Yu;Shu,Yuelong
EPI627750	PB2	China	2014-Feb-07	EPI_ISL_192370	A/Guangdong-Guangzhou/XN00457/2014	WHO Chinese National Influenza Center	WHO Chinese National Influenza Center	Wang,Dayan;Gao,Rongbao;Yang,Lei;Zhou,Shumei;Li,Xiyan;Zhou,Jianfang;Zhu,Wenfei;Guo,Junfeng;Li,Xiaodan;Dong,Jie;Huang,Weijuan;Zhang,Ye;Dong,Libo;Zhao,Xiang;Lu,Jian;Lan,Yu;Shu,Yuelong
EPI627742	PB2	China	2014-Jan-03	EPI_ISL_192369	A/Guangdong/0010/2014	WHO Chinese National Influenza Center	WHO Chinese National Influenza Center	Wang,Dayan;Gao,Rongbao;Yang,Lei;Zhou,Shumei;Li,Xiyan;Zhou,Jianfang;Zhu,Wenfei;Guo,Junfeng;Li,Xiaodan;Dong,Jie;Huang,Weijuan;Zhang,Ye;Dong,Libo;Zhao,Xiang;Lu,Jian;Lan,Yu;Shu,Yuelong
EPI627734	PB2	China	2014-Feb-10	EPI_ISL_192368	A/Guangdong-Guangzhou/XN06587/2014	WHO Chinese National Influenza Center	WHO Chinese National Influenza Center	Wang,Dayan;Gao,Rongbao;Yang,Lei;Zhou,Shumei;Li,Xiyan;Zhou,Jianfang;Zhu,Wenfei;Guo,Junfeng;Li,Xiaodan;Dong,Jie;Huang,Weijuan;Zhang,Ye;Dong,Libo;Zhao,Xiang;Lu,Jian;Lan,Yu;Shu,Yuelong
EPI627726	PB2	China	2014-Jan-10	EPI_ISL_192367	A/Guangdong/0024/2014	WHO Chinese National Influenza Center	WHO Chinese National Influenza Center	Wang,Dayan;Gao,Rongbao;Yang,Lei;Zhou,Shumei;Li,Xiyan;Zhou,Jianfang;Zhu,Wenfei;Guo,Junfeng;Li,Xiaodan;Dong,Jie;Huang,Weijuan;Zhang,Ye;Dong,Libo;Zhao,Xiang;Lu,Jian;Lan,Yu;Shu,Yuelong
EPI627718	PB2	China	2014-Feb-21	EPI_ISL_192366	A/Guangdong-Guangzhou/XN08664/2014	WHO Chinese National Influenza Center	WHO Chinese National Influenza Center	Wang,Dayan;Gao,Rongbao;Yang,Lei;Zhou,Shumei;Li,Xiyan;Zhou,Jianfang;Zhu,Wenfei;Guo,Junfeng;Li,Xiaodan;Dong,Jie;Huang,Weijuan;Zhang,Ye;Dong,Libo;Zhao,Xiang;Lu,Jian;Lan,Yu;Shu,Yuelong
EPI627710	PB2	China	2014-Feb-21	EPI_ISL_192365	A/Guangdong-Guangzhou/XN08747/2014	WHO Chinese National Influenza Center	WHO Chinese National Influenza Center	Wang,Dayan;Gao,Rongbao;Yang,Lei;Zhou,Shumei;Li,Xiyan;Zhou,Jianfang;Zhu,Wenfei;Guo,Junfeng;Li,Xiaodan;Dong,Jie;Huang,Weijuan;Zhang,Ye;Dong,Libo;Zhao,Xiang;Lu,Jian;Lan,Yu;Shu,Yuelong
EPI627702	PB2	China	2014-Feb-21	EPI_ISL_192364	A/Guangdong-Guangzhou/XN08763/2014	WHO Chinese National Influenza Center	WHO Chinese National Influenza Center	Wang,Dayan;Gao,Rongbao;Yang,Lei;Zhou,Shumei;Li,Xiyan;Zhou,Jianfang;Zhu,Wenfei;Guo,Junfeng;Li,Xiaodan;Dong,Jie;Huang,Weijuan;Zhang,Ye;Dong,Libo;Zhao,Xiang;Lu,Jian;Lan,Yu;Shu,Yuelong
EPI627694	PB2	China	2014-Mar-24	EPI_ISL_192363	A/Guangdong-Guangzhou/XN13392/2014	WHO Chinese National Influenza Center	WHO Chinese National Influenza Center	Wang,Dayan;Gao,Rongbao;Yang,Lei;Zhou,Shumei;Li,Xiyan;Zhou,Jianfang;Zhu,Wenfei;Guo,Junfeng;Li,Xiaodan;Dong,Jie;Huang,Weijuan;Zhang,Ye;Dong,Libo;Zhao,Xiang;Lu,Jian;Lan,Yu;Shu,Yuelong
EPI627686	PB2	China	2014-Apr-10	EPI_ISL_192362	A/Guangdong-Guangzhou/XN15122/2014	WHO Chinese National Influenza Center	WHO Chinese National Influenza Center	Wang,Dayan;Gao,Rongbao;Yang,Lei;Zhou,Shumei;Li,Xiyan;Zhou,Jianfang;Zhu,Wenfei;Guo,Junfeng;Li,Xiaodan;Dong,Jie;Huang,Weijuan;Zhang,Ye;Dong,Libo;Zhao,Xiang;Lu,Jian;Lan,Yu;Shu,Yuelong
EPI627678	PB2	China	2014-Feb-05	EPI_ISL_192361	A/Guangdong-Guangzhou/XN00392/2014	WHO Chinese National Influenza Center	WHO Chinese National Influenza Center	Wang,Dayan;Gao,Rongbao;Yang,Lei;Zhou,Shumei;Li,Xiyan;Zhou,Jianfang;Zhu,Wenfei;Guo,Junfeng;Li,Xiaodan;Dong,Jie;Huang,Weijuan;Zhang,Ye;Dong,Libo;Zhao,Xiang;Lu,Jian;Lan,Yu;Shu,Yuelong
EPI627670	PB2	China	2014-Jan-15	EPI_ISL_192360	A/Guangdong-Guangzhou/XN02778/2014	WHO Chinese National Influenza Center	WHO Chinese National Influenza Center	Wang,Dayan;Gao,Rongbao;Yang,Lei;Zhou,Shumei;Li,Xiyan;Zhou,Jianfang;Zhu,Wenfei;Guo,Junfeng;Li,Xiaodan;Dong,Jie;Huang,Weijuan;Zhang,Ye;Dong,Libo;Zhao,Xiang;Lu,Jian;Lan,Yu;Shu,Yuelong
EPI627662	PB2	China	2014-Feb-10	EPI_ISL_192359	A/Guangdong-Guangzhou/XN00509/2014	WHO Chinese National Influenza Center	WHO Chinese National Influenza Center	Wang,Dayan;Gao,Rongbao;Yang,Lei;Zhou,Shumei;Li,Xiyan;Zhou,Jianfang;Zhu,Wenfei;Guo,Junfeng;Li,Xiaodan;Dong,Jie;Huang,Weijuan;Zhang,Ye;Dong,Libo;Zhao,Xiang;Lu,Jian;Lan,Yu;Shu,Yuelong
EPI627654	PB2	China	2014-Feb-16	EPI_ISL_192358	A/Guangdong-Guangzhou/XN00588/2014	WHO Chinese National Influenza Center	WHO Chinese National Influenza Center	Wang,Dayan;Gao,Rongbao;Yang,Lei;Zhou,Shumei;Li,Xiyan;Zhou,Jianfang;Zhu,Wenfei;Guo,Junfeng;Li,Xiaodan;Dong,Jie;Huang,Weijuan;Zhang,Ye;Dong,Libo;Zhao,Xiang;Lu,Jian;Lan,Yu;Shu,Yuelong
EPI627646	PB2	China	2014-Feb-19	EPI_ISL_192357	A/Guangdong-Guangzhou/XN08423/2014	WHO Chinese National Influenza Center	WHO Chinese National Influenza Center	Wang,Dayan;Gao,Rongbao;Yang,Lei;Zhou,Shumei;Li,Xiyan;Zhou,Jianfang;Zhu,Wenfei;Guo,Junfeng;Li,Xiaodan;Dong,Jie;Huang,Weijuan;Zhang,Ye;Dong,Libo;Zhao,Xiang;Lu,Jian;Lan,Yu;Shu,Yuelong
EPI627638	PB2	China	2014-Feb-24	EPI_ISL_192356	A/Guangdong-Guangzhou/XN09086/2014	WHO Chinese National Influenza Center	WHO Chinese National Influenza Center	Wang,Dayan;Gao,Rongbao;Yang,Lei;Zhou,Shumei;Li,Xiyan;Zhou,Jianfang;Zhu,Wenfei;Guo,Junfeng;Li,Xiaodan;Dong,Jie;Huang,Weijuan;Zhang,Ye;Dong,Libo;Zhao,Xiang;Lu,Jian;Lan,Yu;Shu,Yuelong
EPI627630	PB2	China	2014-Mar-31	EPI_ISL_192355	A/Guangdong-Guangzhou/XN14050/2014	WHO Chinese National Influenza Center	WHO Chinese National Influenza Center	Wang,Dayan;Gao,Rongbao;Yang,Lei;Zhou,Shumei;Li,Xiyan;Zhou,Jianfang;Zhu,Wenfei;Guo,Junfeng;Li,Xiaodan;Dong,Jie;Huang,Weijuan;Zhang,Ye;Dong,Libo;Zhao,Xiang;Lu,Jian;Lan,Yu;Shu,Yuelong
EPI627622	PB2	China	2014-Apr-04	EPI_ISL_192354	A/Guangdong-Guangzhou/XN14670/2014	WHO Chinese National Influenza Center	WHO Chinese National Influenza Center	Wang,Dayan;Gao,Rongbao;Yang,Lei;Zhou,Shumei;Li,Xiyan;Zhou,Jianfang;Zhu,Wenfei;Guo,Junfeng;Li,Xiaodan;Dong,Jie;Huang,Weijuan;Zhang,Ye;Dong,Libo;Zhao,Xiang;Lu,Jian;Lan,Yu;Shu,Yuelong
EPI627598	PB2	China	2014-Feb-03	EPI_ISL_192351	A/Zhejiang/20/2014	WHO Chinese National Influenza Center	WHO Chinese National Influenza Center	Wang,Dayan;Gao,Rongbao;Yang,Lei;Zhou,Shumei;Li,Xiyan;Zhou,Jianfang;Zhu,Wenfei;Guo,Junfeng;Li,Xiaodan;Dong,Jie;Huang,Weijuan;Zhang,Ye;Dong,Libo;Zhao,Xiang;Lu,Jian;Lan,Yu;Shu,Yuelong
EPI627590	PB2	China	2014-Jan-27	EPI_ISL_192350	A/Zhejiang/13/2014	WHO Chinese National Influenza Center	WHO Chinese National Influenza Center	Wang,Dayan;Gao,Rongbao;Yang,Lei;Zhou,Shumei;Li,Xiyan;Zhou,Jianfang;Zhu,Wenfei;Guo,Junfeng;Li,Xiaodan;Dong,Jie;Huang,Weijuan;Zhang,Ye;Dong,Libo;Zhao,Xiang;Lu,Jian;Lan,Yu;Shu,Yuelong
EPI627582	PB2	China	2014-Jan-25	EPI_ISL_192349	A/Zhejiang/15/2014	WHO Chinese National Influenza Center	WHO Chinese National Influenza Center	Wang,Dayan;Gao,Rongbao;Yang,Lei;Zhou,Shumei;Li,Xiyan;Zhou,Jianfang;Zhu,Wenfei;Guo,Junfeng;Li,Xiaodan;Dong,Jie;Huang,Weijuan;Zhang,Ye;Dong,Libo;Zhao,Xiang;Lu,Jian;Lan,Yu;Shu,Yuelong
EPI627574	PB2	China	2014-Feb-03	EPI_ISL_192348	A/Zhejiang/16/2014	WHO Chinese National Influenza Center	WHO Chinese National Influenza Center	Wang,Dayan;Gao,Rongbao;Yang,Lei;Zhou,Shumei;Li,Xiyan;Zhou,Jianfang;Zhu,Wenfei;Guo,Junfeng;Li,Xiaodan;Dong,Jie;Huang,Weijuan;Zhang,Ye;Dong,Libo;Zhao,Xiang;Lu,Jian;Lan,Yu;Shu,Yuelong
EPI627566	PB2	China	2014-Jan-23	EPI_ISL_192347	A/Zhejiang/19/2014	WHO Chinese National Influenza Center	WHO Chinese National Influenza Center	Wang,Dayan;Gao,Rongbao;Yang,Lei;Zhou,Shumei;Li,Xiyan;Zhou,Jianfang;Zhu,Wenfei;Guo,Junfeng;Li,Xiaodan;Dong,Jie;Huang,Weijuan;Zhang,Ye;Dong,Libo;Zhao,Xiang;Lu,Jian;Lan,Yu;Shu,Yuelong
EPI627558	PB2	China	2014-Jan-14	EPI_ISL_192346	A/Zhejiang/14/2014	WHO Chinese National Influenza Center	WHO Chinese National Influenza Center	Wang,Dayan;Gao,Rongbao;Yang,Lei;Zhou,Shumei;Li,Xiyan;Zhou,Jianfang;Zhu,Wenfei;Guo,Junfeng;Li,Xiaodan;Dong,Jie;Huang,Weijuan;Zhang,Ye;Dong,Libo;Zhao,Xiang;Lu,Jian;Lan,Yu;Shu,Yuelong
EPI627550	PB2	China	2014-Feb-10	EPI_ISL_192345	A/Zhejiang/21/2014	WHO Chinese National Influenza Center	WHO Chinese National Influenza Center	Wang,Dayan;Gao,Rongbao;Yang,Lei;Zhou,Shumei;Li,Xiyan;Zhou,Jianfang;Zhu,Wenfei;Guo,Junfeng;Li,Xiaodan;Dong,Jie;Huang,Weijuan;Zhang,Ye;Dong,Libo;Zhao,Xiang;Lu,Jian;Lan,Yu;Shu,Yuelong
EPI627542	PB2	China	2014-Feb-08	EPI_ISL_192344	A/Zhejiang/22/2014	WHO Chinese National Influenza Center	WHO Chinese National Influenza Center	Wang,Dayan;Gao,Rongbao;Yang,Lei;Zhou,Shumei;Li,Xiyan;Zhou,Jianfang;Zhu,Wenfei;Guo,Junfeng;Li,Xiaodan;Dong,Jie;Huang,Weijuan;Zhang,Ye;Dong,Libo;Zhao,Xiang;Lu,Jian;Lan,Yu;Shu,Yuelong
EPI627534	PB2	China	2014-Feb-09	EPI_ISL_192343	A/Zhejiang/23/2014	WHO Chinese National Influenza Center	WHO Chinese National Influenza Center	Wang,Dayan;Gao,Rongbao;Yang,Lei;Zhou,Shumei;Li,Xiyan;Zhou,Jianfang;Zhu,Wenfei;Guo,Junfeng;Li,Xiaodan;Dong,Jie;Huang,Weijuan;Zhang,Ye;Dong,Libo;Zhao,Xiang;Lu,Jian;Lan,Yu;Shu,Yuelong
EPI627526	PB2	China	2014-Jan-24	EPI_ISL_192342	A/Zhejiang/24/2014	WHO Chinese National Influenza Center	WHO Chinese National Influenza Center	Wang,Dayan;Gao,Rongbao;Yang,Lei;Zhou,Shumei;Li,Xiyan;Zhou,Jianfang;Zhu,Wenfei;Guo,Junfeng;Li,Xiaodan;Dong,Jie;Huang,Weijuan;Zhang,Ye;Dong,Libo;Zhao,Xiang;Lu,Jian;Lan,Yu;Shu,Yuelong
EPI627518	PB2	China	2014-Mar-28	EPI_ISL_192341	A/fujian/16/2014	WHO Chinese National Influenza Center	WHO Chinese National Influenza Center	Wang,Dayan;Gao,Rongbao;Yang,Lei;Zhou,Shumei;Li,Xiyan;Zhou,Jianfang;Zhu,Wenfei;Guo,Junfeng;Li,Xiaodan;Dong,Jie;Huang,Weijuan;Zhang,Ye;Dong,Libo;Zhao,Xiang;Lu,Jian;Lan,Yu;Shu,Yuelong
EPI627502	PB2	China	2014-Nov-29	EPI_ISL_192339	A/Xinjiang/98691/2014	WHO Chinese National Influenza Center	WHO Chinese National Influenza Center	Wang,Dayan;Gao,Rongbao;Yang,Lei;Zhou,Shumei;Li,Xiyan;Zhou,Jianfang;Zhu,Wenfei;Guo,Junfeng;Li,Xiaodan;Dong,Jie;Huang,Weijuan;Zhang,Ye;Dong,Libo;Zhao,Xiang;Lu,Jian;Lan,Yu;Shu,Yuelong
EPI627494	PB2	China	2014-Dec-23	EPI_ISL_192338	A/Fujian/20/2014	WHO Chinese National Influenza Center	WHO Chinese National Influenza Center	Wang,Dayan;Gao,Rongbao;Yang,Lei;Zhou,Shumei;Li,Xiyan;Zhou,Jianfang;Zhu,Wenfei;Guo,Junfeng;Li,Xiaodan;Dong,Jie;Huang,Weijuan;Zhang,Ye;Dong,Libo;Zhao,Xiang;Lu,Jian;Lan,Yu;Shu,Yuelong
EPI627486	PB2	China	2014-Dec-21	EPI_ISL_192337	A/Fujian/19/2014	WHO Chinese National Influenza Center	WHO Chinese National Influenza Center	Wang,Dayan;Gao,Rongbao;Yang,Lei;Zhou,Shumei;Li,Xiyan;Zhou,Jianfang;Zhu,Wenfei;Guo,Junfeng;Li,Xiaodan;Dong,Jie;Huang,Weijuan;Zhang,Ye;Dong,Libo;Zhao,Xiang;Lu,Jian;Lan,Yu;Shu,Yuelong
EPI627478	PB2	China	2014-Dec-02	EPI_ISL_192336	A/Fujian/17/2014	WHO Chinese National Influenza Center	WHO Chinese National Influenza Center	Wang,Dayan;Gao,Rongbao;Yang,Lei;Zhou,Shumei;Li,Xiyan;Zhou,Jianfang;Zhu,Wenfei;Guo,Junfeng;Li,Xiaodan;Dong,Jie;Huang,Weijuan;Zhang,Ye;Dong,Libo;Zhao,Xiang;Lu,Jian;Lan,Yu;Shu,Yuelong
EPI627470	PB2	China	2015-Jan-01	EPI_ISL_192335	A/Fujian/1/2015	WHO Chinese National Influenza Center	WHO Chinese National Influenza Center	Wang,Dayan;Gao,Rongbao;Yang,Lei;Zhou,Shumei;Li,Xiyan;Zhou,Jianfang;Zhu,Wenfei;Guo,Junfeng;Li,Xiaodan;Dong,Jie;Huang,Weijuan;Zhang,Ye;Dong,Libo;Zhao,Xiang;Lu,Jian;Lan,Yu;Shu,Yuelong
EPI627462	PB2	China	2015-Jan-03	EPI_ISL_192334	A/Fujian/2/2015	WHO Chinese National Influenza Center	WHO Chinese National Influenza Center	Wang,Dayan;Gao,Rongbao;Yang,Lei;Zhou,Shumei;Li,Xiyan;Zhou,Jianfang;Zhu,Wenfei;Guo,Junfeng;Li,Xiaodan;Dong,Jie;Huang,Weijuan;Zhang,Ye;Dong,Libo;Zhao,Xiang;Lu,Jian;Lan,Yu;Shu,Yuelong
EPI627454	PB2	China	2015-Jan-04	EPI_ISL_192333	A/Fujian/3/2015	WHO Chinese National Influenza Center	WHO Chinese National Influenza Center	Wang,Dayan;Gao,Rongbao;Yang,Lei;Zhou,Shumei;Li,Xiyan;Zhou,Jianfang;Zhu,Wenfei;Guo,Junfeng;Li,Xiaodan;Dong,Jie;Huang,Weijuan;Zhang,Ye;Dong,Libo;Zhao,Xiang;Lu,Jian;Lan,Yu;Shu,Yuelong
EPI627446	PB2	China	2014-Apr-02	EPI_ISL_192332	A/Anhui/01879/2014	WHO Chinese National Influenza Center	WHO Chinese National Influenza Center	Wang,Dayan;Gao,Rongbao;Yang,Lei;Zhou,Shumei;Li,Xiyan;Zhou,Jianfang;Zhu,Wenfei;Guo,Junfeng;Li,Xiaodan;Dong,Jie;Huang,Weijuan;Zhang,Ye;Dong,Libo;Zhao,Xiang;Lu,Jian;Lan,Yu;Shu,Yuelong
EPI627438	PB2	China	2014-May-20	EPI_ISL_192331	A/Anhui/01887/2014	WHO Chinese National Influenza Center	WHO Chinese National Influenza Center	Wang,Dayan;Gao,Rongbao;Yang,Lei;Zhou,Shumei;Li,Xiyan;Zhou,Jianfang;Zhu,Wenfei;Guo,Junfeng;Li,Xiaodan;Dong,Jie;Huang,Weijuan;Zhang,Ye;Dong,Libo;Zhao,Xiang;Lu,Jian;Lan,Yu;Shu,Yuelong
EPI627430	PB2	China	2014-Apr-26	EPI_ISL_192330	A/Anhui/01883/2014	WHO Chinese National Influenza Center	WHO Chinese National Influenza Center	Wang,Dayan;Gao,Rongbao;Yang,Lei;Zhou,Shumei;Li,Xiyan;Zhou,Jianfang;Zhu,Wenfei;Guo,Junfeng;Li,Xiaodan;Dong,Jie;Huang,Weijuan;Zhang,Ye;Dong,Libo;Zhao,Xiang;Lu,Jian;Lan,Yu;Shu,Yuelong
EPI627422	PB2	China	2014-Apr-26	EPI_ISL_192329	A/Anhui/01882/2014	WHO Chinese National Influenza Center	WHO Chinese National Influenza Center	Wang,Dayan;Gao,Rongbao;Yang,Lei;Zhou,Shumei;Li,Xiyan;Zhou,Jianfang;Zhu,Wenfei;Guo,Junfeng;Li,Xiaodan;Dong,Jie;Huang,Weijuan;Zhang,Ye;Dong,Libo;Zhao,Xiang;Lu,Jian;Lan,Yu;Shu,Yuelong
EPI627414	PB2	China	2014-Apr-13	EPI_ISL_192328	A/Anhui/01881/2014	WHO Chinese National Influenza Center	WHO Chinese National Influenza Center	Wang,Dayan;Gao,Rongbao;Yang,Lei;Zhou,Shumei;Li,Xiyan;Zhou,Jianfang;Zhu,Wenfei;Guo,Junfeng;Li,Xiaodan;Dong,Jie;Huang,Weijuan;Zhang,Ye;Dong,Libo;Zhao,Xiang;Lu,Jian;Lan,Yu;Shu,Yuelong
EPI627406	PB2	China	2014-Apr-02	EPI_ISL_192327	A/Anhui/01878/2014	WHO Chinese National Influenza Center	WHO Chinese National Influenza Center	Wang,Dayan;Gao,Rongbao;Yang,Lei;Zhou,Shumei;Li,Xiyan;Zhou,Jianfang;Zhu,Wenfei;Guo,Junfeng;Li,Xiaodan;Dong,Jie;Huang,Weijuan;Zhang,Ye;Dong,Libo;Zhao,Xiang;Lu,Jian;Lan,Yu;Shu,Yuelong
EPI627398	PB2	China	2014-Mar-10	EPI_ISL_192326	A/Anhui/01876/2014	WHO Chinese National Influenza Center	WHO Chinese National Influenza Center	Wang,Dayan;Gao,Rongbao;Yang,Lei;Zhou,Shumei;Li,Xiyan;Zhou,Jianfang;Zhu,Wenfei;Guo,Junfeng;Li,Xiaodan;Dong,Jie;Huang,Weijuan;Zhang,Ye;Dong,Libo;Zhao,Xiang;Lu,Jian;Lan,Yu;Shu,Yuelong
EPI627390	PB2	China	2014-Feb-19	EPI_ISL_192325	A/Anhui/01872/2014	WHO Chinese National Influenza Center	WHO Chinese National Influenza Center	Wang,Dayan;Gao,Rongbao;Yang,Lei;Zhou,Shumei;Li,Xiyan;Zhou,Jianfang;Zhu,Wenfei;Guo,Junfeng;Li,Xiaodan;Dong,Jie;Huang,Weijuan;Zhang,Ye;Dong,Libo;Zhao,Xiang;Lu,Jian;Lan,Yu;Shu,Yuelong
EPI627382	PB2	China	2014-Dec-03	EPI_ISL_192324	A/Guangdong/02497/2014	WHO Chinese National Influenza Center	WHO Chinese National Influenza Center	Wang,Dayan;Gao,Rongbao;Yang,Lei;Zhou,Shumei;Li,Xiyan;Zhou,Jianfang;Zhu,Wenfei;Guo,Junfeng;Li,Xiaodan;Dong,Jie;Huang,Weijuan;Zhang,Ye;Dong,Libo;Zhao,Xiang;Lu,Jian;Lan,Yu;Shu,Yuelong
EPI627374	PB2	China	2014-Dec-29	EPI_ISL_192323	A/Fujian/21/2014	WHO Chinese National Influenza Center	WHO Chinese National Influenza Center	Wang,Dayan;Gao,Rongbao;Yang,Lei;Zhou,Shumei;Li,Xiyan;Zhou,Jianfang;Zhu,Wenfei;Guo,Junfeng;Li,Xiaodan;Dong,Jie;Huang,Weijuan;Zhang,Ye;Dong,Libo;Zhao,Xiang;Lu,Jian;Lan,Yu;Shu,Yuelong
EPI627366	PB2	China	2014-Dec-29	EPI_ISL_192322	A/Fujian/22/2014	WHO Chinese National Influenza Center	WHO Chinese National Influenza Center	Wang,Dayan;Gao,Rongbao;Yang,Lei;Zhou,Shumei;Li,Xiyan;Zhou,Jianfang;Zhu,Wenfei;Guo,Junfeng;Li,Xiaodan;Dong,Jie;Huang,Weijuan;Zhang,Ye;Dong,Libo;Zhao,Xiang;Lu,Jian;Lan,Yu;Shu,Yuelong
EPI627358	PB2	China	2015-Jan-07	EPI_ISL_192321	A/Fujian/5/2015	WHO Chinese National Influenza Center	WHO Chinese National Influenza Center	Wang,Dayan;Gao,Rongbao;Yang,Lei;Zhou,Shumei;Li,Xiyan;Zhou,Jianfang;Zhu,Wenfei;Guo,Junfeng;Li,Xiaodan;Dong,Jie;Huang,Weijuan;Zhang,Ye;Dong,Libo;Zhao,Xiang;Lu,Jian;Lan,Yu;Shu,Yuelong
EPI627334	PB2	China	2015-Jan-05	EPI_ISL_192318	A/Fujian/4/2015	WHO Chinese National Influenza Center	WHO Chinese National Influenza Center	Wang,Dayan;Gao,Rongbao;Yang,Lei;Zhou,Shumei;Li,Xiyan;Zhou,Jianfang;Zhu,Wenfei;Guo,Junfeng;Li,Xiaodan;Dong,Jie;Huang,Weijuan;Zhang,Ye;Dong,Libo;Zhao,Xiang;Lu,Jian;Lan,Yu;Shu,Yuelong
EPI627326	PB2	China	2014-Dec-25	EPI_ISL_192317	A/Xinjiang/05915/2014	WHO Chinese National Influenza Center	WHO Chinese National Influenza Center	Wang,Dayan;Gao,Rongbao;Yang,Lei;Zhou,Shumei;Li,Xiyan;Zhou,Jianfang;Zhu,Wenfei;Guo,Junfeng;Li,Xiaodan;Dong,Jie;Huang,Weijuan;Zhang,Ye;Dong,Libo;Zhao,Xiang;Lu,Jian;Lan,Yu;Shu,Yuelong
EPI627318	PB2	China	2015-Jan-08	EPI_ISL_192316	A/Xinjiang/05914/2015	WHO Chinese National Influenza Center	WHO Chinese National Influenza Center	Wang,Dayan;Gao,Rongbao;Yang,Lei;Zhou,Shumei;Li,Xiyan;Zhou,Jianfang;Zhu,Wenfei;Guo,Junfeng;Li,Xiaodan;Dong,Jie;Huang,Weijuan;Zhang,Ye;Dong,Libo;Zhao,Xiang;Lu,Jian;Lan,Yu;Shu,Yuelong
EPI627310	PB2	China	2015-Jan-12	EPI_ISL_192315	A/Fujian/8/2015	WHO Chinese National Influenza Center	WHO Chinese National Influenza Center	Wang,Dayan;Gao,Rongbao;Yang,Lei;Zhou,Shumei;Li,Xiyan;Zhou,Jianfang;Zhu,Wenfei;Guo,Junfeng;Li,Xiaodan;Dong,Jie;Huang,Weijuan;Zhang,Ye;Dong,Libo;Zhao,Xiang;Lu,Jian;Lan,Yu;Shu,Yuelong
EPI627302	PB2	China	2015-Jan-15	EPI_ISL_192314	A/Fujian/11/2015	WHO Chinese National Influenza Center	WHO Chinese National Influenza Center	Wang,Dayan;Gao,Rongbao;Yang,Lei;Zhou,Shumei;Li,Xiyan;Zhou,Jianfang;Zhu,Wenfei;Guo,Junfeng;Li,Xiaodan;Dong,Jie;Huang,Weijuan;Zhang,Ye;Dong,Libo;Zhao,Xiang;Lu,Jian;Lan,Yu;Shu,Yuelong
EPI627294	PB2	China	2015-Jan-16	EPI_ISL_192313	A/Fujian/19/2015	WHO Chinese National Influenza Center	WHO Chinese National Influenza Center	Wang,Dayan;Gao,Rongbao;Yang,Lei;Zhou,Shumei;Li,Xiyan;Zhou,Jianfang;Zhu,Wenfei;Guo,Junfeng;Li,Xiaodan;Dong,Jie;Huang,Weijuan;Zhang,Ye;Dong,Libo;Zhao,Xiang;Lu,Jian;Lan,Yu;Shu,Yuelong
EPI627286	PB2	China	2015-Jan-16	EPI_ISL_192312	A/Fujian/20/2015	WHO Chinese National Influenza Center	WHO Chinese National Influenza Center	Wang,Dayan;Gao,Rongbao;Yang,Lei;Zhou,Shumei;Li,Xiyan;Zhou,Jianfang;Zhu,Wenfei;Guo,Junfeng;Li,Xiaodan;Dong,Jie;Huang,Weijuan;Zhang,Ye;Dong,Libo;Zhao,Xiang;Lu,Jian;Lan,Yu;Shu,Yuelong
EPI627278	PB2	China	2015-Jan-13	EPI_ISL_192311	A/Fujian/9/2015	WHO Chinese National Influenza Center	WHO Chinese National Influenza Center	Wang,Dayan;Gao,Rongbao;Yang,Lei;Zhou,Shumei;Li,Xiyan;Zhou,Jianfang;Zhu,Wenfei;Guo,Junfeng;Li,Xiaodan;Dong,Jie;Huang,Weijuan;Zhang,Ye;Dong,Libo;Zhao,Xiang;Lu,Jian;Lan,Yu;Shu,Yuelong
EPI627270	PB2	China	2015-Jan-04	EPI_ISL_192310	A/Guangdong/15SF001/2015	WHO Chinese National Influenza Center	WHO Chinese National Influenza Center	Wang,Dayan;Gao,Rongbao;Yang,Lei;Zhou,Shumei;Li,Xiyan;Zhou,Jianfang;Zhu,Wenfei;Guo,Junfeng;Li,Xiaodan;Dong,Jie;Huang,Weijuan;Zhang,Ye;Dong,Libo;Zhao,Xiang;Lu,Jian;Lan,Yu;Shu,Yuelong
EPI627262	PB2	China	2015-Jan-17	EPI_ISL_192309	A/Guangdong/15SF021/2015	WHO Chinese National Influenza Center	WHO Chinese National Influenza Center	Wang,Dayan;Gao,Rongbao;Yang,Lei;Zhou,Shumei;Li,Xiyan;Zhou,Jianfang;Zhu,Wenfei;Guo,Junfeng;Li,Xiaodan;Dong,Jie;Huang,Weijuan;Zhang,Ye;Dong,Libo;Zhao,Xiang;Lu,Jian;Lan,Yu;Shu,Yuelong
EPI627254	PB2	China	2015-Jan-12	EPI_ISL_192308	A/Fujian/7/2015	WHO Chinese National Influenza Center	WHO Chinese National Influenza Center	Wang,Dayan;Gao,Rongbao;Yang,Lei;Zhou,Shumei;Li,Xiyan;Zhou,Jianfang;Zhu,Wenfei;Guo,Junfeng;Li,Xiaodan;Dong,Jie;Huang,Weijuan;Zhang,Ye;Dong,Libo;Zhao,Xiang;Lu,Jian;Lan,Yu;Shu,Yuelong
EPI627246	PB2	China	2015-Jan-11	EPI_ISL_192307	A/Fujian/14/2015	WHO Chinese National Influenza Center	WHO Chinese National Influenza Center	Wang,Dayan;Gao,Rongbao;Yang,Lei;Zhou,Shumei;Li,Xiyan;Zhou,Jianfang;Zhu,Wenfei;Guo,Junfeng;Li,Xiaodan;Dong,Jie;Huang,Weijuan;Zhang,Ye;Dong,Libo;Zhao,Xiang;Lu,Jian;Lan,Yu;Shu,Yuelong
EPI627238	PB2	China	2015-Jan-17	EPI_ISL_192306	A/Fujian/21/2015	WHO Chinese National Influenza Center	WHO Chinese National Influenza Center	Wang,Dayan;Gao,Rongbao;Yang,Lei;Zhou,Shumei;Li,Xiyan;Zhou,Jianfang;Zhu,Wenfei;Guo,Junfeng;Li,Xiaodan;Dong,Jie;Huang,Weijuan;Zhang,Ye;Dong,Libo;Zhao,Xiang;Lu,Jian;Lan,Yu;Shu,Yuelong
EPI627230	PB2	China	2015-Jan-19	EPI_ISL_192305	A/Fujian/23/2015	WHO Chinese National Influenza Center	WHO Chinese National Influenza Center	Wang,Dayan;Gao,Rongbao;Yang,Lei;Zhou,Shumei;Li,Xiyan;Zhou,Jianfang;Zhu,Wenfei;Guo,Junfeng;Li,Xiaodan;Dong,Jie;Huang,Weijuan;Zhang,Ye;Dong,Libo;Zhao,Xiang;Lu,Jian;Lan,Yu;Shu,Yuelong
EPI627222	PB2	China	2015-Jan-18	EPI_ISL_192304	A/Fujian/24/2015	WHO Chinese National Influenza Center	WHO Chinese National Influenza Center	Wang,Dayan;Gao,Rongbao;Yang,Lei;Zhou,Shumei;Li,Xiyan;Zhou,Jianfang;Zhu,Wenfei;Guo,Junfeng;Li,Xiaodan;Dong,Jie;Huang,Weijuan;Zhang,Ye;Dong,Libo;Zhao,Xiang;Lu,Jian;Lan,Yu;Shu,Yuelong
EPI627214	PB2	China	2015-Jan-22	EPI_ISL_192303	A/Fujian/25/2015	WHO Chinese National Influenza Center	WHO Chinese National Influenza Center	Wang,Dayan;Gao,Rongbao;Yang,Lei;Zhou,Shumei;Li,Xiyan;Zhou,Jianfang;Zhu,Wenfei;Guo,Junfeng;Li,Xiaodan;Dong,Jie;Huang,Weijuan;Zhang,Ye;Dong,Libo;Zhao,Xiang;Lu,Jian;Lan,Yu;Shu,Yuelong
EPI627206	PB2	China	2015-Jan-05	EPI_ISL_192302	A/Guangdong/15SF002/2015	WHO Chinese National Influenza Center	WHO Chinese National Influenza Center	Wang,Dayan;Gao,Rongbao;Yang,Lei;Zhou,Shumei;Li,Xiyan;Zhou,Jianfang;Zhu,Wenfei;Guo,Junfeng;Li,Xiaodan;Dong,Jie;Huang,Weijuan;Zhang,Ye;Dong,Libo;Zhao,Xiang;Lu,Jian;Lan,Yu;Shu,Yuelong
EPI627198	PB2	China	2015-Jan-15	EPI_ISL_192301	A/Guangdong/15SF017/2015	WHO Chinese National Influenza Center	WHO Chinese National Influenza Center	Wang,Dayan;Gao,Rongbao;Yang,Lei;Zhou,Shumei;Li,Xiyan;Zhou,Jianfang;Zhu,Wenfei;Guo,Junfeng;Li,Xiaodan;Dong,Jie;Huang,Weijuan;Zhang,Ye;Dong,Libo;Zhao,Xiang;Lu,Jian;Lan,Yu;Shu,Yuelong
EPI627190	PB2	China	2015-Jan-13	EPI_ISL_192300	A/Guangdong/15SF020/2015	WHO Chinese National Influenza Center	WHO Chinese National Influenza Center	Wang,Dayan;Gao,Rongbao;Yang,Lei;Zhou,Shumei;Li,Xiyan;Zhou,Jianfang;Zhu,Wenfei;Guo,Junfeng;Li,Xiaodan;Dong,Jie;Huang,Weijuan;Zhang,Ye;Dong,Libo;Zhao,Xiang;Lu,Jian;Lan,Yu;Shu,Yuelong
EPI627182	PB2	China	2014-Nov-27	EPI_ISL_192299	A/Zhejiang/33/2014	WHO Chinese National Influenza Center	WHO Chinese National Influenza Center	Wang,Dayan;Gao,Rongbao;Yang,Lei;Zhou,Shumei;Li,Xiyan;Zhou,Jianfang;Zhu,Wenfei;Guo,Junfeng;Li,Xiaodan;Dong,Jie;Huang,Weijuan;Zhang,Ye;Dong,Libo;Zhao,Xiang;Lu,Jian;Lan,Yu;Shu,Yuelong
EPI627174	PB2	China	2015-Jan-26	EPI_ISL_192298	A/Zhejiang/5/2015	WHO Chinese National Influenza Center	WHO Chinese National Influenza Center	Wang,Dayan;Gao,Rongbao;Yang,Lei;Zhou,Shumei;Li,Xiyan;Zhou,Jianfang;Zhu,Wenfei;Guo,Junfeng;Li,Xiaodan;Dong,Jie;Huang,Weijuan;Zhang,Ye;Dong,Libo;Zhao,Xiang;Lu,Jian;Lan,Yu;Shu,Yuelong
EPI627166	PB2	China	2015-Jan-23	EPI_ISL_192297	A/Zhejiang/4/2015	WHO Chinese National Influenza Center	WHO Chinese National Influenza Center	Wang,Dayan;Gao,Rongbao;Yang,Lei;Zhou,Shumei;Li,Xiyan;Zhou,Jianfang;Zhu,Wenfei;Guo,Junfeng;Li,Xiaodan;Dong,Jie;Huang,Weijuan;Zhang,Ye;Dong,Libo;Zhao,Xiang;Lu,Jian;Lan,Yu;Shu,Yuelong
EPI627158	PB2	China	2015-Jan-19	EPI_ISL_192296	A/Zhejiang/3/2015	WHO Chinese National Influenza Center	WHO Chinese National Influenza Center	Wang,Dayan;Gao,Rongbao;Yang,Lei;Zhou,Shumei;Li,Xiyan;Zhou,Jianfang;Zhu,Wenfei;Guo,Junfeng;Li,Xiaodan;Dong,Jie;Huang,Weijuan;Zhang,Ye;Dong,Libo;Zhao,Xiang;Lu,Jian;Lan,Yu;Shu,Yuelong
EPI627150	PB2	China	2014-Dec-25	EPI_ISL_192295	A/Zhejiang/34/2014	WHO Chinese National Influenza Center	WHO Chinese National Influenza Center	Wang,Dayan;Gao,Rongbao;Yang,Lei;Zhou,Shumei;Li,Xiyan;Zhou,Jianfang;Zhu,Wenfei;Guo,Junfeng;Li,Xiaodan;Dong,Jie;Huang,Weijuan;Zhang,Ye;Dong,Libo;Zhao,Xiang;Lu,Jian;Lan,Yu;Shu,Yuelong
EPI627142	PB2	China	2014-Dec-26	EPI_ISL_192294	A/Zhejiang/35/2014	WHO Chinese National Influenza Center	WHO Chinese National Influenza Center	Wang,Dayan;Gao,Rongbao;Yang,Lei;Zhou,Shumei;Li,Xiyan;Zhou,Jianfang;Zhu,Wenfei;Guo,Junfeng;Li,Xiaodan;Dong,Jie;Huang,Weijuan;Zhang,Ye;Dong,Libo;Zhao,Xiang;Lu,Jian;Lan,Yu;Shu,Yuelong
EPI627134	PB2	China	2015-Jan-13	EPI_ISL_192293	A/Zhejiang/1/2015	WHO Chinese National Influenza Center	WHO Chinese National Influenza Center	Wang,Dayan;Gao,Rongbao;Yang,Lei;Zhou,Shumei;Li,Xiyan;Zhou,Jianfang;Zhu,Wenfei;Guo,Junfeng;Li,Xiaodan;Dong,Jie;Huang,Weijuan;Zhang,Ye;Dong,Libo;Zhao,Xiang;Lu,Jian;Lan,Yu;Shu,Yuelong
EPI627126	PB2	China	2014-Dec-28	EPI_ISL_192292	A/Zhejiang/36/2014	WHO Chinese National Influenza Center	WHO Chinese National Influenza Center	Wang,Dayan;Gao,Rongbao;Yang,Lei;Zhou,Shumei;Li,Xiyan;Zhou,Jianfang;Zhu,Wenfei;Guo,Junfeng;Li,Xiaodan;Dong,Jie;Huang,Weijuan;Zhang,Ye;Dong,Libo;Zhao,Xiang;Lu,Jian;Lan,Yu;Shu,Yuelong
EPI627118	PB2	China	2015-Jan-22	EPI_ISL_192291	A/Guangdong/15SF030/2015	WHO Chinese National Influenza Center	WHO Chinese National Influenza Center	Wang,Dayan;Gao,Rongbao;Yang,Lei;Zhou,Shumei;Li,Xiyan;Zhou,Jianfang;Zhu,Wenfei;Guo,Junfeng;Li,Xiaodan;Dong,Jie;Huang,Weijuan;Zhang,Ye;Dong,Libo;Zhao,Xiang;Lu,Jian;Lan,Yu;Shu,Yuelong
EPI627110	PB2	China	2015-Jan-23	EPI_ISL_192290	A/Guangdong/15SF043/2015	WHO Chinese National Influenza Center	WHO Chinese National Influenza Center	Wang,Dayan;Gao,Rongbao;Yang,Lei;Zhou,Shumei;Li,Xiyan;Zhou,Jianfang;Zhu,Wenfei;Guo,Junfeng;Li,Xiaodan;Dong,Jie;Huang,Weijuan;Zhang,Ye;Dong,Libo;Zhao,Xiang;Lu,Jian;Lan,Yu;Shu,Yuelong
EPI627102	PB2	China	2015-Jan-15	EPI_ISL_192289	A/Fujian/17/2015	WHO Chinese National Influenza Center	WHO Chinese National Influenza Center	Wang,Dayan;Gao,Rongbao;Yang,Lei;Zhou,Shumei;Li,Xiyan;Zhou,Jianfang;Zhu,Wenfei;Guo,Junfeng;Li,Xiaodan;Dong,Jie;Huang,Weijuan;Zhang,Ye;Dong,Libo;Zhao,Xiang;Lu,Jian;Lan,Yu;Shu,Yuelong
EPI627094	PB2	China	2015-Jan-23	EPI_ISL_192288	A/Jiangsu/19758/2015	WHO Chinese National Influenza Center	WHO Chinese National Influenza Center	Wang,Dayan;Gao,Rongbao;Yang,Lei;Zhou,Shumei;Li,Xiyan;Zhou,Jianfang;Zhu,Wenfei;Guo,Junfeng;Li,Xiaodan;Dong,Jie;Huang,Weijuan;Zhang,Ye;Dong,Libo;Zhao,Xiang;Lu,Jian;Lan,Yu;Shu,Yuelong
EPI627086	PB2	China	2015-Feb-10	EPI_ISL_192287	A/Hunan/19763/2015	WHO Chinese National Influenza Center	WHO Chinese National Influenza Center	Wang,Dayan;Gao,Rongbao;Yang,Lei;Zhou,Shumei;Li,Xiyan;Zhou,Jianfang;Zhu,Wenfei;Guo,Junfeng;Li,Xiaodan;Dong,Jie;Huang,Weijuan;Zhang,Ye;Dong,Libo;Zhao,Xiang;Lu,Jian;Lan,Yu;Shu,Yuelong
EPI627078	PB2	China	2015-Feb-10	EPI_ISL_192286	A/Hunan/19762/2015	WHO Chinese National Influenza Center	WHO Chinese National Influenza Center	Wang,Dayan;Gao,Rongbao;Yang,Lei;Zhou,Shumei;Li,Xiyan;Zhou,Jianfang;Zhu,Wenfei;Guo,Junfeng;Li,Xiaodan;Dong,Jie;Huang,Weijuan;Zhang,Ye;Dong,Libo;Zhao,Xiang;Lu,Jian;Lan,Yu;Shu,Yuelong
EPI627070	PB2	China	2015-Jan-28	EPI_ISL_192285	A/Guangdong/15SF050/2015	WHO Chinese National Influenza Center	WHO Chinese National Influenza Center	Wang,Dayan;Gao,Rongbao;Yang,Lei;Zhou,Shumei;Li,Xiyan;Zhou,Jianfang;Zhu,Wenfei;Guo,Junfeng;Li,Xiaodan;Dong,Jie;Huang,Weijuan;Zhang,Ye;Dong,Libo;Zhao,Xiang;Lu,Jian;Lan,Yu;Shu,Yuelong
EPI627062	PB2	China	2015-Feb-04	EPI_ISL_192284	A/Guangdong/15SF053/2015	WHO Chinese National Influenza Center	WHO Chinese National Influenza Center	Wang,Dayan;Gao,Rongbao;Yang,Lei;Zhou,Shumei;Li,Xiyan;Zhou,Jianfang;Zhu,Wenfei;Guo,Junfeng;Li,Xiaodan;Dong,Jie;Huang,Weijuan;Zhang,Ye;Dong,Libo;Zhao,Xiang;Lu,Jian;Lan,Yu;Shu,Yuelong
EPI627054	PB2	China	2015-Jan-31	EPI_ISL_192283	A/Guangdong/15SF051/2015	WHO Chinese National Influenza Center	WHO Chinese National Influenza Center	Wang,Dayan;Gao,Rongbao;Yang,Lei;Zhou,Shumei;Li,Xiyan;Zhou,Jianfang;Zhu,Wenfei;Guo,Junfeng;Li,Xiaodan;Dong,Jie;Huang,Weijuan;Zhang,Ye;Dong,Libo;Zhao,Xiang;Lu,Jian;Lan,Yu;Shu,Yuelong
EPI627046	PB2	China	2015-Feb-10	EPI_ISL_192282	A/Guangdong/15SF081/2015	WHO Chinese National Influenza Center	WHO Chinese National Influenza Center	Wang,Dayan;Gao,Rongbao;Yang,Lei;Zhou,Shumei;Li,Xiyan;Zhou,Jianfang;Zhu,Wenfei;Guo,Junfeng;Li,Xiaodan;Dong,Jie;Huang,Weijuan;Zhang,Ye;Dong,Libo;Zhao,Xiang;Lu,Jian;Lan,Yu;Shu,Yuelong
EPI627038	PB2	China	2015-Jan-10	EPI_ISL_192281	A/Fujian/6/2015	WHO Chinese National Influenza Center	WHO Chinese National Influenza Center	Wang,Dayan;Gao,Rongbao;Yang,Lei;Zhou,Shumei;Li,Xiyan;Zhou,Jianfang;Zhu,Wenfei;Guo,Junfeng;Li,Xiaodan;Dong,Jie;Huang,Weijuan;Zhang,Ye;Dong,Libo;Zhao,Xiang;Lu,Jian;Lan,Yu;Shu,Yuelong
EPI627030	PB2	China	2015-Jan-28	EPI_ISL_192280	A/Zhejiang/6/2015	WHO Chinese National Influenza Center	WHO Chinese National Influenza Center	Wang,Dayan;Gao,Rongbao;Yang,Lei;Zhou,Shumei;Li,Xiyan;Zhou,Jianfang;Zhu,Wenfei;Guo,Junfeng;Li,Xiaodan;Dong,Jie;Huang,Weijuan;Zhang,Ye;Dong,Libo;Zhao,Xiang;Lu,Jian;Lan,Yu;Shu,Yuelong
EPI627022	PB2	China	2015-Jan-21	EPI_ISL_192279	A/Guangdong/15SF027/2015	WHO Chinese National Influenza Center	WHO Chinese National Influenza Center	Wang,Dayan;Gao,Rongbao;Yang,Lei;Zhou,Shumei;Li,Xiyan;Zhou,Jianfang;Zhu,Wenfei;Guo,Junfeng;Li,Xiaodan;Dong,Jie;Huang,Weijuan;Zhang,Ye;Dong,Libo;Zhao,Xiang;Lu,Jian;Lan,Yu;Shu,Yuelong
EPI627014	PB2	China	2014-Dec-31	EPI_ISL_192278	A/Jiangsu/18828/2014	WHO Chinese National Influenza Center	WHO Chinese National Influenza Center	Wang,Dayan;Gao,Rongbao;Yang,Lei;Zhou,Shumei;Li,Xiyan;Zhou,Jianfang;Zhu,Wenfei;Guo,Junfeng;Li,Xiaodan;Dong,Jie;Huang,Weijuan;Zhang,Ye;Dong,Libo;Zhao,Xiang;Lu,Jian;Lan,Yu;Shu,Yuelong
EPI627006	PB2	China	2015-Jan-23	EPI_ISL_192277	A/Jiangsu/19757/2015	WHO Chinese National Influenza Center	WHO Chinese National Influenza Center	Wang,Dayan;Gao,Rongbao;Yang,Lei;Zhou,Shumei;Li,Xiyan;Zhou,Jianfang;Zhu,Wenfei;Guo,Junfeng;Li,Xiaodan;Dong,Jie;Huang,Weijuan;Zhang,Ye;Dong,Libo;Zhao,Xiang;Lu,Jian;Lan,Yu;Shu,Yuelong
EPI626998	PB2	China	2015-Feb-10	EPI_ISL_192276	A/Guangdong/15SF080/2015	WHO Chinese National Influenza Center	WHO Chinese National Influenza Center	Wang,Dayan;Gao,Rongbao;Yang,Lei;Zhou,Shumei;Li,Xiyan;Zhou,Jianfang;Zhu,Wenfei;Guo,Junfeng;Li,Xiaodan;Dong,Jie;Huang,Weijuan;Zhang,Ye;Dong,Libo;Zhao,Xiang;Lu,Jian;Lan,Yu;Shu,Yuelong
EPI626990	PB2	China	2015-Feb-06	EPI_ISL_192275	A/Guangdong/15SF082/2015	WHO Chinese National Influenza Center	WHO Chinese National Influenza Center	Wang,Dayan;Gao,Rongbao;Yang,Lei;Zhou,Shumei;Li,Xiyan;Zhou,Jianfang;Zhu,Wenfei;Guo,Junfeng;Li,Xiaodan;Dong,Jie;Huang,Weijuan;Zhang,Ye;Dong,Libo;Zhao,Xiang;Lu,Jian;Lan,Yu;Shu,Yuelong
EPI626982	PB2	China	2015-Jan-16	EPI_ISL_192274	A/Jiangsu/22184/2015	WHO Chinese National Influenza Center	WHO Chinese National Influenza Center	Wang,Dayan;Gao,Rongbao;Yang,Lei;Zhou,Shumei;Li,Xiyan;Zhou,Jianfang;Zhu,Wenfei;Guo,Junfeng;Li,Xiaodan;Dong,Jie;Huang,Weijuan;Zhang,Ye;Dong,Libo;Zhao,Xiang;Lu,Jian;Lan,Yu;Shu,Yuelong
EPI620045	PB2	China	2013-Jan-01	EPI_ISL_190417	A/Anhui/1-BALF_RG5/2013		Import from public-domain	Wentworth,D.E.; Halpin,R.A.; Lin,X.; Bera,J.; Akopov,A.; Ransier,A.; Mohan,M.; Fedorova,N.; Tsitrin,T.; Puri,V.; Stockwell,T.; Amedeo,P.; Appalla,L.; Bishop,B.; Edworthy,P.; Gupta,N.; Hoover,J.; Katzel,D.; Schobel,S.; Shrivastava,S.; Thovarai,V.; Wang,S.; Bao,Y.; Sanders,R.; Zhdanov,S.; Kiryutin,B.; Lipman,D.J.; Tatusova,T.; Richt,J.A.
EPI620038	PB2	China	2013-Jan-01	EPI_ISL_190416	A/Anhui/1-BALF_RG4/2013		Import from public-domain	Wentworth,D.E.; Halpin,R.A.; Lin,X.; Bera,J.; Akopov,A.; Ransier,A.; Mohan,M.; Fedorova,N.; Tsitrin,T.; Puri,V.; Stockwell,T.; Amedeo,P.; Appalla,L.; Bishop,B.; Edworthy,P.; Gupta,N.; Hoover,J.; Katzel,D.; Schobel,S.; Shrivastava,S.; Thovarai,V.; Wang,S.; Bao,Y.; Sanders,R.; Zhdanov,S.; Kiryutin,B.; Lipman,D.J.; Tatusova,T.; Richt,J.A.
EPI620077	PB2	China	2013-Jan-01	EPI_ISL_190415	A/Anhui/1-BALF_RG41/2013		Import from public-domain	Wentworth,D.E.; Halpin,R.A.; Lin,X.; Bera,J.; Akopov,A.; Ransier,A.; Mohan,M.; Fedorova,N.; Tsitrin,T.; Puri,V.; Stockwell,T.; Amedeo,P.; Appalla,L.; Bishop,B.; Edworthy,P.; Gupta,N.; Hoover,J.; Katzel,D.; Schobel,S.; Shrivastava,S.; Thovarai,V.; Wang,S.; Bao,Y.; Sanders,R.; Zhdanov,S.; Kiryutin,B.; Lipman,D.J.; Tatusova,T.; Richt,J.A.
EPI620059	PB2	China	2013-Jan-01	EPI_ISL_190414	A/Anhui/1-BALF_RG1/2013		Import from public-domain	Wentworth,D.E.; Halpin,R.A.; Lin,X.; Bera,J.; Akopov,A.; Ransier,A.; Mohan,M.; Fedorova,N.; Tsitrin,T.; Puri,V.; Stockwell,T.; Amedeo,P.; Appalla,L.; Bishop,B.; Edworthy,P.; Gupta,N.; Hoover,J.; Katzel,D.; Schobel,S.; Shrivastava,S.; Thovarai,V.; Wang,S.; Bao,Y.; Sanders,R.; Zhdanov,S.; Kiryutin,B.; Lipman,D.J.; Tatusova,T.; Richt,J.A.
EPI620031	PB2	China	2013-Jan-01	EPI_ISL_190413	A/Anhui/1-BALF_RG3/2013		Import from public-domain	Wentworth,D.E.; Halpin,R.A.; Lin,X.; Bera,J.; Akopov,A.; Ransier,A.; Mohan,M.; Fedorova,N.; Tsitrin,T.; Puri,V.; Stockwell,T.; Amedeo,P.; Appalla,L.; Bishop,B.; Edworthy,P.; Gupta,N.; Hoover,J.; Katzel,D.; Schobel,S.; Shrivastava,S.; Thovarai,V.; Wang,S.; Bao,Y.; Sanders,R.; Zhdanov,S.; Kiryutin,B.; Lipman,D.J.; Tatusova,T.; Richt,J.A.
EPI620024	PB2	China	2013-Jan-01	EPI_ISL_190412	A/Anhui/1-BALF_RG2/2013		Import from public-domain	Wentworth,D.E.; Halpin,R.A.; Lin,X.; Bera,J.; Akopov,A.; Ransier,A.; Mohan,M.; Fedorova,N.; Tsitrin,T.; Puri,V.; Stockwell,T.; Amedeo,P.; Appalla,L.; Bishop,B.; Edworthy,P.; Gupta,N.; Hoover,J.; Katzel,D.; Schobel,S.; Shrivastava,S.; Thovarai,V.; Wang,S.; Bao,Y.; Sanders,R.; Zhdanov,S.; Kiryutin,B.; Lipman,D.J.; Tatusova,T.; Richt,J.A.
EPI620098	PB2	China	2013-Jan-01	EPI_ISL_190411	A/Anhui/1-BALF_RG44/2013		Import from public-domain	Wentworth,D.E.; Halpin,R.A.; Lin,X.; Bera,J.; Akopov,A.; Ransier,A.; Mohan,M.; Fedorova,N.; Tsitrin,T.; Puri,V.; Stockwell,T.; Amedeo,P.; Appalla,L.; Bishop,B.; Edworthy,P.; Gupta,N.; Hoover,J.; Katzel,D.; Schobel,S.; Shrivastava,S.; Thovarai,V.; Wang,S.; Bao,Y.; Sanders,R.; Zhdanov,S.; Kiryutin,B.; Lipman,D.J.; Tatusova,T.; Richt,J.A.
EPI620084	PB2	China	2013-Jan-01	EPI_ISL_190410	A/Anhui/1-BALF_RG42/2013		Import from public-domain	Wentworth,D.E.; Halpin,R.A.; Lin,X.; Bera,J.; Akopov,A.; Ransier,A.; Mohan,M.; Fedorova,N.; Tsitrin,T.; Puri,V.; Stockwell,T.; Amedeo,P.; Appalla,L.; Bishop,B.; Edworthy,P.; Gupta,N.; Hoover,J.; Katzel,D.; Schobel,S.; Shrivastava,S.; Thovarai,V.; Wang,S.; Bao,Y.; Sanders,R.; Zhdanov,S.; Kiryutin,B.; Lipman,D.J.; Tatusova,T.; Richt,J.A.
EPI620052	PB2	China	2013-Jan-01	EPI_ISL_190409	A/Anhui/1-BALF_RG45/2013		Import from public-domain	Wentworth,D.E.; Halpin,R.A.; Lin,X.; Bera,J.; Akopov,A.; Ransier,A.; Mohan,M.; Fedorova,N.; Tsitrin,T.; Puri,V.; Stockwell,T.; Amedeo,P.; Appalla,L.; Bishop,B.; Edworthy,P.; Gupta,N.; Hoover,J.; Katzel,D.; Schobel,S.; Shrivastava,S.; Thovarai,V.; Wang,S.; Bao,Y.; Sanders,R.; Zhdanov,S.; Kiryutin,B.; Lipman,D.J.; Tatusova,T.; Richt,J.A.
EPI620091	PB2	China	2013-Jan-01	EPI_ISL_190408	A/Anhui/1-BALF_RG43/2013		Import from public-domain	Wentworth,D.E.; Halpin,R.A.; Lin,X.; Bera,J.; Akopov,A.; Ransier,A.; Mohan,M.; Fedorova,N.; Tsitrin,T.; Puri,V.; Stockwell,T.; Amedeo,P.; Appalla,L.; Bishop,B.; Edworthy,P.; Gupta,N.; Hoover,J.; Katzel,D.; Schobel,S.; Shrivastava,S.; Thovarai,V.; Wang,S.; Bao,Y.; Sanders,R.; Zhdanov,S.; Kiryutin,B.; Lipman,D.J.; Tatusova,T.; Richt,J.A.
EPI620070	PB2	China	2013-Jan-01	EPI_ISL_190407	A/Anhui/1-BALF_RG40/2013		Import from public-domain	Wentworth,D.E.; Halpin,R.A.; Lin,X.; Bera,J.; Akopov,A.; Ransier,A.; Mohan,M.; Fedorova,N.; Tsitrin,T.; Puri,V.; Stockwell,T.; Amedeo,P.; Appalla,L.; Bishop,B.; Edworthy,P.; Gupta,N.; Hoover,J.; Katzel,D.; Schobel,S.; Shrivastava,S.; Thovarai,V.; Wang,S.; Bao,Y.; Sanders,R.; Zhdanov,S.; Kiryutin,B.; Lipman,D.J.; Tatusova,T.; Richt,J.A.
EPI620124	PB2	China	2013-Jan-01	EPI_ISL_190406	A/Anhui/1-BALF_RG32/2013		Import from public-domain	Wentworth,D.E.; Halpin,R.A.; Lin,X.; Bera,J.; Akopov,A.; Ransier,A.; Mohan,M.; Fedorova,N.; Tsitrin,T.; Puri,V.; Stockwell,T.; Amedeo,P.; Appalla,L.; Bishop,B.; Edworthy,P.; Gupta,N.; Hoover,J.; Katzel,D.; Schobel,S.; Shrivastava,S.; Thovarai,V.; Wang,S.; Bao,Y.; Sanders,R.; Zhdanov,S.; Kiryutin,B.; Lipman,D.J.; Tatusova,T.; Richt,J.A.
EPI620117	PB2	China	2013-Jan-01	EPI_ISL_190405	A/Anhui/1-BALF_RG31/2013		Import from public-domain	Wentworth,D.E.; Halpin,R.A.; Lin,X.; Bera,J.; Akopov,A.; Ransier,A.; Mohan,M.; Fedorova,N.; Tsitrin,T.; Puri,V.; Stockwell,T.; Amedeo,P.; Appalla,L.; Bishop,B.; Edworthy,P.; Gupta,N.; Hoover,J.; Katzel,D.; Schobel,S.; Shrivastava,S.; Thovarai,V.; Wang,S.; Bao,Y.; Sanders,R.; Zhdanov,S.; Kiryutin,B.; Lipman,D.J.; Tatusova,T.; Richt,J.A.
EPI620110	PB2	China	2013-Jan-01	EPI_ISL_190404	A/Anhui/1-BALF_RG29/2013		Import from public-domain	Wentworth,D.E.; Halpin,R.A.; Lin,X.; Bera,J.; Akopov,A.; Ransier,A.; Mohan,M.; Fedorova,N.; Tsitrin,T.; Puri,V.; Stockwell,T.; Amedeo,P.; Appalla,L.; Bishop,B.; Edworthy,P.; Gupta,N.; Hoover,J.; Katzel,D.; Schobel,S.; Shrivastava,S.; Thovarai,V.; Wang,S.; Bao,Y.; Sanders,R.; Zhdanov,S.; Kiryutin,B.; Lipman,D.J.; Tatusova,T.; Richt,J.A.
EPI620148	PB2	China	2013-Jan-01	EPI_ISL_190403	A/Anhui/1-BALF_RG20/2013		Import from public-domain	Wentworth,D.E.; Halpin,R.A.; Lin,X.; Bera,J.; Akopov,A.; Ransier,A.; Mohan,M.; Fedorova,N.; Tsitrin,T.; Puri,V.; Stockwell,T.; Amedeo,P.; Appalla,L.; Bishop,B.; Edworthy,P.; Gupta,N.; Hoover,J.; Katzel,D.; Schobel,S.; Shrivastava,S.; Thovarai,V.; Wang,S.; Bao,Y.; Sanders,R.; Zhdanov,S.; Kiryutin,B.; Lipman,D.J.; Tatusova,T.; Richt,J.A.
EPI620103	PB2	China	2013-Jan-01	EPI_ISL_190402	A/Anhui/1-BALF_RG21/2013		Import from public-domain	Wentworth,D.E.; Halpin,R.A.; Lin,X.; Bera,J.; Akopov,A.; Ransier,A.; Mohan,M.; Fedorova,N.; Tsitrin,T.; Puri,V.; Stockwell,T.; Amedeo,P.; Appalla,L.; Bishop,B.; Edworthy,P.; Gupta,N.; Hoover,J.; Katzel,D.; Schobel,S.; Shrivastava,S.; Thovarai,V.; Wang,S.; Bao,Y.; Sanders,R.; Zhdanov,S.; Kiryutin,B.; Lipman,D.J.; Tatusova,T.; Richt,J.A.
EPI620141	PB2	China	2013-Jan-01	EPI_ISL_190401	A/Anhui/1-BALF_RG19/2013		Import from public-domain	Wentworth,D.E.; Halpin,R.A.; Lin,X.; Bera,J.; Akopov,A.; Ransier,A.; Mohan,M.; Fedorova,N.; Tsitrin,T.; Puri,V.; Stockwell,T.; Amedeo,P.; Appalla,L.; Bishop,B.; Edworthy,P.; Gupta,N.; Hoover,J.; Katzel,D.; Schobel,S.; Shrivastava,S.; Thovarai,V.; Wang,S.; Bao,Y.; Sanders,R.; Zhdanov,S.; Kiryutin,B.; Lipman,D.J.; Tatusova,T.; Richt,J.A.
EPI620134	PB2	China	2013-Jan-01	EPI_ISL_190400	A/Anhui/1-BALF_RG18/2013		Import from public-domain	Wentworth,D.E.; Halpin,R.A.; Lin,X.; Bera,J.; Akopov,A.; Ransier,A.; Mohan,M.; Fedorova,N.; Tsitrin,T.; Puri,V.; Stockwell,T.; Amedeo,P.; Appalla,L.; Bishop,B.; Edworthy,P.; Gupta,N.; Hoover,J.; Katzel,D.; Schobel,S.; Shrivastava,S.; Thovarai,V.; Wang,S.; Bao,Y.; Sanders,R.; Zhdanov,S.; Kiryutin,B.; Lipman,D.J.; Tatusova,T.; Richt,J.A.
EPI620127	PB2	China	2013-Jan-01	EPI_ISL_190399	A/Anhui/1-BALF_RG17/2013		Import from public-domain	Wentworth,D.E.; Halpin,R.A.; Lin,X.; Bera,J.; Akopov,A.; Ransier,A.; Mohan,M.; Fedorova,N.; Tsitrin,T.; Puri,V.; Stockwell,T.; Amedeo,P.; Appalla,L.; Bishop,B.; Edworthy,P.; Gupta,N.; Hoover,J.; Katzel,D.; Schobel,S.; Shrivastava,S.; Thovarai,V.; Wang,S.; Bao,Y.; Sanders,R.; Zhdanov,S.; Kiryutin,B.; Lipman,D.J.; Tatusova,T.; Richt,J.A.
EPI620173	PB2	China	2013-Jan-01	EPI_ISL_190398	A/Anhui/1-BALF_RG9/2013		Import from public-domain	Wentworth,D.E.; Halpin,R.A.; Lin,X.; Bera,J.; Akopov,A.; Ransier,A.; Mohan,M.; Fedorova,N.; Tsitrin,T.; Puri,V.; Stockwell,T.; Amedeo,P.; Appalla,L.; Bishop,B.; Edworthy,P.; Gupta,N.; Hoover,J.; Katzel,D.; Schobel,S.; Shrivastava,S.; Thovarai,V.; Wang,S.; Bao,Y.; Sanders,R.; Zhdanov,S.; Kiryutin,B.; Lipman,D.J.; Tatusova,T.; Richt,J.A.
EPI620166	PB2	China	2013-Jan-01	EPI_ISL_190397	A/Anhui/1-BALF_RG8/2013		Import from public-domain	Wentworth,D.E.; Halpin,R.A.; Lin,X.; Bera,J.; Akopov,A.; Ransier,A.; Mohan,M.; Fedorova,N.; Tsitrin,T.; Puri,V.; Stockwell,T.; Amedeo,P.; Appalla,L.; Bishop,B.; Edworthy,P.; Gupta,N.; Hoover,J.; Katzel,D.; Schobel,S.; Shrivastava,S.; Thovarai,V.; Wang,S.; Bao,Y.; Sanders,R.; Zhdanov,S.; Kiryutin,B.; Lipman,D.J.; Tatusova,T.; Richt,J.A.
EPI620159	PB2	China	2013-Jan-01	EPI_ISL_190396	A/Anhui/1-BALF_RG7/2013		Import from public-domain	Wentworth,D.E.; Halpin,R.A.; Lin,X.; Bera,J.; Akopov,A.; Ransier,A.; Mohan,M.; Fedorova,N.; Tsitrin,T.; Puri,V.; Stockwell,T.; Amedeo,P.; Appalla,L.; Bishop,B.; Edworthy,P.; Gupta,N.; Hoover,J.; Katzel,D.; Schobel,S.; Shrivastava,S.; Thovarai,V.; Wang,S.; Bao,Y.; Sanders,R.; Zhdanov,S.; Kiryutin,B.; Lipman,D.J.; Tatusova,T.; Richt,J.A.
EPI620152	PB2	China	2013-Jan-01	EPI_ISL_190395	A/Anhui/1-BALF_RG6/2013		Import from public-domain	Wentworth,D.E.; Halpin,R.A.; Lin,X.; Bera,J.; Akopov,A.; Ransier,A.; Mohan,M.; Fedorova,N.; Tsitrin,T.; Puri,V.; Stockwell,T.; Amedeo,P.; Appalla,L.; Bishop,B.; Edworthy,P.; Gupta,N.; Hoover,J.; Katzel,D.; Schobel,S.; Shrivastava,S.; Thovarai,V.; Wang,S.; Bao,Y.; Sanders,R.; Zhdanov,S.; Kiryutin,B.; Lipman,D.J.; Tatusova,T.; Richt,J.A.
EPI620198	PB2	China	2013-Jan-01	EPI_ISL_190394	A/Anhui/1-JCVI1_RG3/2013		Import from public-domain	Wentworth,D.E.; Halpin,R.A.; Lin,X.; Bera,J.; Akopov,A.; Ransier,A.; Mohan,M.; Fedorova,N.; Tsitrin,T.; Puri,V.; Stockwell,T.; Amedeo,P.; Appalla,L.; Bishop,B.; Edworthy,P.; Gupta,N.; Hoover,J.; Katzel,D.; Schobel,S.; Shrivastava,S.; Thovarai,V.; Wang,S.; Bao,Y.; Sanders,R.; Zhdanov,S.; Kiryutin,B.; Lipman,D.J.; Tatusova,T.; Richt,J.A.
EPI620191	PB2	China	2013-Jan-01	EPI_ISL_190393	A/Anhui/1-JCVI1_RG2/2013		Import from public-domain	Wentworth,D.E.; Halpin,R.A.; Lin,X.; Bera,J.; Akopov,A.; Ransier,A.; Mohan,M.; Fedorova,N.; Tsitrin,T.; Puri,V.; Stockwell,T.; Amedeo,P.; Appalla,L.; Bishop,B.; Edworthy,P.; Gupta,N.; Hoover,J.; Katzel,D.; Schobel,S.; Shrivastava,S.; Thovarai,V.; Wang,S.; Bao,Y.; Sanders,R.; Zhdanov,S.; Kiryutin,B.; Lipman,D.J.; Tatusova,T.; Richt,J.A.
EPI620184	PB2	China	2013-Jan-01	EPI_ISL_190392	A/Anhui/1-JCVI1_RG1/2013		Import from public-domain	Wentworth,D.E.; Halpin,R.A.; Lin,X.; Bera,J.; Akopov,A.; Ransier,A.; Mohan,M.; Fedorova,N.; Tsitrin,T.; Puri,V.; Stockwell,T.; Amedeo,P.; Appalla,L.; Bishop,B.; Edworthy,P.; Gupta,N.; Hoover,J.; Katzel,D.; Schobel,S.; Shrivastava,S.; Thovarai,V.; Wang,S.; Bao,Y.; Sanders,R.; Zhdanov,S.; Kiryutin,B.; Lipman,D.J.; Tatusova,T.; Richt,J.A.
EPI619994	PB2	China	2013-Jan-01	EPI_ISL_190391	A/Anhui/1-BALF_RG33/2013		Import from public-domain	Wentworth,D.E.; Halpin,R.A.; Lin,X.; Bera,J.; Akopov,A.; Ransier,A.; Mohan,M.; Fedorova,N.; Tsitrin,T.; Puri,V.; Stockwell,T.; Amedeo,P.; Appalla,L.; Bishop,B.; Edworthy,P.; Gupta,N.; Hoover,J.; Katzel,D.; Schobel,S.; Shrivastava,S.; Thovarai,V.; Wang,S.; Bao,Y.; Sanders,R.; Zhdanov,S.; Kiryutin,B.; Lipman,D.J.; Tatusova,T.; Richt,J.A.
EPI592184	PB2	China	2014-Mar-23	EPI_ISL_179907	A/Shenzhen/SP126/2014		Import from public-domain	Lam,T.Y.; Zhou,B.; Wang,J.; Chai,Y.; Shen,Y.; Chen,X.; Ma,C.; Hong,W.; Chen,Y.; Zhang,Y.; Duan,L.; Chen,P.; Jiang,J.; Li,L.; Poon,L.M.; Webby,R.J.; Smith,D.K.; Leung,G.M.; Peiris,J.M.; Holmes,E.C.; Guan,Y.; Zhu,H.
EPI592191	PB2	China	2014-Apr-02	EPI_ISL_179906	A/Shenzhen/SP139/2014		Import from public-domain	Lam,T.Y.; Zhou,B.; Wang,J.; Chai,Y.; Shen,Y.; Chen,X.; Ma,C.; Hong,W.; Chen,Y.; Zhang,Y.; Duan,L.; Chen,P.; Jiang,J.; Li,L.; Poon,L.M.; Webby,R.J.; Smith,D.K.; Leung,G.M.; Peiris,J.M.; Holmes,E.C.; Guan,Y.; Zhu,H.
EPI585982	PB2	China	2013-Apr-04	EPI_ISL_177875	A/Shanghai/ION/2013		Import from public-domain	Hu,Y.; Ren,X.; Yang,F.; Jin,Q.
EPI583282	PB2	China	2014-Jan-25	EPI_ISL_175838	A/Shenzhen/SP49/2014		Import from public-domain	Lam,T.Y.; Zhou,B.; Wang,J.; Chai,Y.; Shen,Y.; Chen,X.; Ma,C.; Hong,W.; Chen,Y.; Zhang,Y.; Duan,L.; Chen,P.; Jiang,J.; Li,L.; Poon,L.M.; Webby,R.J.; Smith,D.K.; Leung,G.M.; Peiris,J.M.; Holmes,E.C.; Guan,Y.; Zhu,H.
EPI583275	PB2	China	2014-Jan-23	EPI_ISL_175837	A/Shenzhen/SP48/2014		Import from public-domain	Lam,T.Y.; Zhou,B.; Wang,J.; Chai,Y.; Shen,Y.; Chen,X.; Ma,C.; Hong,W.; Chen,Y.; Zhang,Y.; Duan,L.; Chen,P.; Jiang,J.; Li,L.; Poon,L.M.; Webby,R.J.; Smith,D.K.; Leung,G.M.; Peiris,J.M.; Holmes,E.C.; Guan,Y.; Zhu,H.
EPI583261	PB2	China	2014-Jan-22	EPI_ISL_175836	A/Shenzhen/SP38/2014		Import from public-domain	Lam,T.Y.; Zhou,B.; Wang,J.; Chai,Y.; Shen,Y.; Chen,X.; Ma,C.; Hong,W.; Chen,Y.; Zhang,Y.; Duan,L.; Chen,P.; Jiang,J.; Li,L.; Poon,L.M.; Webby,R.J.; Smith,D.K.; Leung,G.M.; Peiris,J.M.; Holmes,E.C.; Guan,Y.; Zhu,H.
EPI583268	PB2	China	2014-Jan-23	EPI_ISL_175835	A/Shenzhen/SP44/2014		Import from public-domain	Lam,T.Y.; Zhou,B.; Wang,J.; Chai,Y.; Shen,Y.; Chen,X.; Ma,C.; Hong,W.; Chen,Y.; Zhang,Y.; Duan,L.; Chen,P.; Jiang,J.; Li,L.; Poon,L.M.; Webby,R.J.; Smith,D.K.; Leung,G.M.; Peiris,J.M.; Holmes,E.C.; Guan,Y.; Zhu,H.
EPI583254	PB2	China	2014-Jan-18	EPI_ISL_175834	A/Shenzhen/SP16/2014		Import from public-domain	Lam,T.Y.; Zhou,B.; Wang,J.; Chai,Y.; Shen,Y.; Chen,X.; Ma,C.; Hong,W.; Chen,Y.; Zhang,Y.; Duan,L.; Chen,P.; Jiang,J.; Li,L.; Poon,L.M.; Webby,R.J.; Smith,D.K.; Leung,G.M.; Peiris,J.M.; Holmes,E.C.; Guan,Y.; Zhu,H.
EPI583247	PB2	China	2014-Jan-14	EPI_ISL_175833	A/Shenzhen/SP-W1/2014		Import from public-domain	Lam,T.Y.; Zhou,B.; Wang,J.; Chai,Y.; Shen,Y.; Chen,X.; Ma,C.; Hong,W.; Chen,Y.; Zhang,Y.; Duan,L.; Chen,P.; Jiang,J.; Li,L.; Poon,L.M.; Webby,R.J.; Smith,D.K.; Leung,G.M.; Peiris,J.M.; Holmes,E.C.; Guan,Y.; Zhu,H.
EPI583240	PB2	China	2014-Jan-20	EPI_ISL_175832	A/Shenzhen/SP26/2014		Import from public-domain	Lam,T.Y.; Zhou,B.; Wang,J.; Chai,Y.; Shen,Y.; Chen,X.; Ma,C.; Hong,W.; Chen,Y.; Zhang,Y.; Duan,L.; Chen,P.; Jiang,J.; Li,L.; Poon,L.M.; Webby,R.J.; Smith,D.K.; Leung,G.M.; Peiris,J.M.; Holmes,E.C.; Guan,Y.; Zhu,H.
EPI583233	PB2	China	2014-Jan-20	EPI_ISL_175831	A/Shenzhen/SP17/2014		Import from public-domain	Lam,T.Y.; Zhou,B.; Wang,J.; Chai,Y.; Shen,Y.; Chen,X.; Ma,C.; Hong,W.; Chen,Y.; Zhang,Y.; Duan,L.; Chen,P.; Jiang,J.; Li,L.; Poon,L.M.; Webby,R.J.; Smith,D.K.; Leung,G.M.; Peiris,J.M.; Holmes,E.C.; Guan,Y.; Zhu,H.
EPI583226	PB2	China	2014-Jan-16	EPI_ISL_175830	A/Shenzhen/SP4/2014		Import from public-domain	Lam,T.Y.; Zhou,B.; Wang,J.; Chai,Y.; Shen,Y.; Chen,X.; Ma,C.; Hong,W.; Chen,Y.; Zhang,Y.; Duan,L.; Chen,P.; Jiang,J.; Li,L.; Poon,L.M.; Webby,R.J.; Smith,D.K.; Leung,G.M.; Peiris,J.M.; Holmes,E.C.; Guan,Y.; Zhu,H.
EPI583219	PB2	China	2014-Jan-11	EPI_ISL_175829	A/Shenzhen/SP-Z93/2014		Import from public-domain	Lam,T.Y.; Zhou,B.; Wang,J.; Chai,Y.; Shen,Y.; Chen,X.; Ma,C.; Hong,W.; Chen,Y.; Zhang,Y.; Duan,L.; Chen,P.; Jiang,J.; Li,L.; Poon,L.M.; Webby,R.J.; Smith,D.K.; Leung,G.M.; Peiris,J.M.; Holmes,E.C.; Guan,Y.; Zhu,H.
EPI576617	PB2	China	2014-Jan-17	EPI_ISL_175597	A/Shanghai/PD-02/2014		Import from public-domain	Pan,H.; Chen,J.; Wu,F.; Zhao,B.; Zhang,X.; Teng,Z.; Yu,X.; Zhu,Z.
EPI576615	PB2	China	2014-Jan-17	EPI_ISL_175596	A/Shanghai/PD-01/2014		Import from public-domain	Pan,H.; Chen,J.; Wu,F.; Zhao,B.; Zhang,X.; Teng,Z.; Yu,X.; Zhu,Z.
EPI568646	PB2	China	2013-Mar-05	EPI_ISL_173625	A/Shanghai/02/2013		Import from public-domain	Zhu,H.; Wang,D.; Kelvin,D.J.; Li,L.; Zheng,Z.; Yoon,S.W.; Wong,S.S.; Farooqui,A.; Wang,J.; Banner,D.; Chen,R.; Zheng,R.; Zhou,J.; Zhang,Y.; Hong,W.; Dong,W.; Cai,Q.; Roehrl,M.H.; Huang,S.S.; Kelvin,A.A.; Yao,T.; Zhou,B.; Chen,X.; Leung,G.M.; Poon,L.L.; Webster,R.G.; Webby,R.J.; Peiris,J.S.; Guan,Y.; Shu,Y.; Roehrl,M.A.; Huang,S.H.; Calvin,A.A.
EPI585267	PB2	China	2015-Feb-09	EPI_ISL_173403	A/Shantou/2003/2015	International Institute of Infection and Immunity, Shantou University Medical College	Shantou University Medical College	Farooqui,A;Liu,W;Kelvin,DJ;Zeng,T;Liu,Y;Zhang,L;Khan,A;Wu,X;Wu,R;Wu,S;Huang,L;Cai,Y;Kelvin,AA;Paquette,SG;Hu,K;Zheng,N;Chen,H;Xu,S;Lin,C;Sun,P;Yao,Z;Wang,J;Ma,H;Zhu,Z;Lin,P;Chen,W;Fang,X;Bermejo-Martin,JF;Leon,AJ
EPI560395	PB2	Canada	2015-Jan-16	EPI_ISL_171342	A/British Columbia/1/2015	B.C. Centre for Disease Control	Public Health Agency of Canada (PHAC)	Bastien,Nathalie; Krajden,Mel; Tang,Patrick; Li,Yan
EPI553467	PB2	Hong Kong (SAR)	2014-Dec-25	EPI_ISL_169442	A/Hong Kong/8194273/2014	Hong Kong Department of Health	Hong Kong Department of Health	Mak,G.C.; Lo,J.Y.C.
EPI533247	PB2	China	2014-Feb-27	EPI_ISL_163321	A/Zhejiang/8/2014	Zhejiang Provincial Center for Disease Control and Prevention	Zhejiang Provincial Center for Disease Control and Prevention	Sun, Y; Zhang, YJ
EPI533240	PB2	China	2014-Feb-24	EPI_ISL_163320	A/Zhejiang/7/2014	Zhejiang Provincial Center for Disease Control and Prevention	Zhejiang Provincial Center for Disease Control and Prevention	Sun, Y; Zhang, YJ
EPI528295	PB2	China	2014-Feb-19	EPI_ISL_161665	A/Jilin/10117/2014	WHO Chinese National Influenza Center	WHO Chinese National Influenza Center	Wang,Dayan;Gao,Rongbao;Yang,Lei;Zhou,Shumei;Li,Xiyan;Zhou,Jianfang;Zhu,Wenfei;Guo,Junfeng;Li,Xiaodan;Dong,Jie;Huang,Weijuan;Zhang,Ye;Dong,Libo;Zhao,Xiang;Lu,Jian;Lan,Yu;Shu,Yuelong
EPI516603	PB2	Hong Kong (SAR)	2014-Apr-13	EPI_ISL_159478	A/Hong Kong/8122430/2014	Hong Kong Department of Health	Hong Kong Department of Health	Mak,G.C.; Cheng,P.K.C.; Lo,J.Y.C.
EPI516595	PB2	Hong Kong (SAR)	2014-Apr-03	EPI_ISL_159477	A/Hong Kong/5581/2014	Hong Kong Department of Health	Hong Kong Department of Health	Mak,G.C.; Cheng,P.K.C.; Lo,J.Y.C.
EPI515882	PB2	China	2013-Dec-01	EPI_ISL_159073	A/Guangdong/YJ-05/2013	Guangdong Provincial Center for Disease Control and Prevention	Guangdong Provincial Center for Disease Control and Prevention	Jing, L
EPI515874	PB2	China	2013-Dec-01	EPI_ISL_159072	A/Guangdong/YJ-04/2013	Guangdong Provincial Center for Disease Control and Prevention	Guangdong Provincial Center for Disease Control and Prevention	Jing, L
EPI515866	PB2	China	2013-Dec-01	EPI_ISL_159071	A/Guangdong/DG-03/2013	Guangdong Provincial Center for Disease Control and Prevention	Guangdong Provincial Center for Disease Control and Prevention	Jing, L
EPI515858	PB2	China	2013-Nov-01	EPI_ISL_159070	A/Guangdong/DG-02/2013	Guangdong Provincial Center for Disease Control and Prevention	Guangdong Provincial Center for Disease Control and Prevention	Jing, L
EPI509510	PB2	Hong Kong (SAR)	2013-Nov-30	EPI_ISL_157487	A/Hong Kong/470129/2013		Import from public-domain	Kai-Wang To,K.; Song,W.; Lau,S.Y.; Que,T.L.; Lung,D.C.; Fan-Ngai Hung,I.; Chen,H.; Yuen,K.Y.; To,K.K.W.; Lau,S.-Y.; Que,T.-L.; Chan,J.F.W.; Chan,K.-H.; Yuen,K.-Y.
EPI509144	PB2	China	2014-Jan-27	EPI_ISL_157296	A/Guangxi/08309/2014		WHO Chinese National Influenza Center	Wang,Dayan;Gao,Rongbao;Yang,Lei;Li,Xiyan;Cheng,Yanhui;Zou,Shumei;Zhou,Jianfang;Zhu,Wenfei;Guo,Junfeng;Dong,Jie;Zhang,Ye;Liu,Liqi;Bo,Hong;Xin,Li;Huang,Weijuan;Dong,Libo;Zhao,Xiang;Lan,Yu;Li,Xiaodan;Shu,Yuelong
EPI509143	PB2	China	2014-Feb-05	EPI_ISL_157295	A/Guangxi/08971/2014		WHO Chinese National Influenza Center	Wang,Dayan;Gao,Rongbao;Yang,Lei;Li,Xiyan;Cheng,Yanhui;Zou,Shumei;Zhou,Jianfang;Zhu,Wenfei;Guo,Junfeng;Dong,Jie;Zhang,Ye;Liu,Liqi;Bo,Hong;Xin,Li;Huang,Weijuan;Dong,Libo;Zhao,Xiang;Lan,Yu;Li,Xiaodan;Shu,Yuelong
EPI509128	PB2	China	2014-Feb-03	EPI_ISL_157294	A/Guangxi/08970/2014		WHO Chinese National Influenza Center	Wang,Dayan;Gao,Rongbao;Yang,Lei;Li,Xiyan;Cheng,Yanhui;Zou,Shumei;Zhou,Jianfang;Zhu,Wenfei;Guo,Junfeng;Dong,Jie;Zhang,Ye;Liu,Liqi;Bo,Hong;Xin,Li;Huang,Weijuan;Dong,Libo;Zhao,Xiang;Lan,Yu;Li,Xiaodan;Shu,Yuelong
EPI509127	PB2	China	2013-Jul-19	EPI_ISL_157293	A/Hebei/01/2013		WHO Chinese National Influenza Center	Wang,Dayan;Gao,Rongbao;Yang,Lei;Li,Xiyan;Cheng,Yanhui;Zou,Shumei;Zhou,Jianfang;Zhu,Wenfei;Guo,Junfeng;Dong,Jie;Zhang,Ye;Liu,Liqi;Bo,Hong;Xin,Li;Huang,Weijuan;Dong,Libo;Zhao,Xiang;Lan,Yu;Li,Xiaodan;Shu,Yuelong
EPI509112	PB2	China	2013-Apr-27	EPI_ISL_157292	A/Fujian/05/2013		WHO Chinese National Influenza Center	Wang,Dayan;Gao,Rongbao;Yang,Lei;Li,Xiyan;Cheng,Yanhui;Zou,Shumei;Zhou,Jianfang;Zhu,Wenfei;Guo,Junfeng;Dong,Jie;Zhang,Ye;Liu,Liqi;Bo,Hong;Xin,Li;Huang,Weijuan;Dong,Libo;Zhao,Xiang;Lan,Yu;Li,Xiaodan;Shu,Yuelong
EPI509110	PB2	China	2013-May-02	EPI_ISL_157290	A/Fujian/04/2013		WHO Chinese National Influenza Center	Wang,Dayan;Gao,Rongbao;Yang,Lei;Li,Xiyan;Cheng,Yanhui;Zou,Shumei;Zhou,Jianfang;Zhu,Wenfei;Guo,Junfeng;Dong,Jie;Zhang,Ye;Liu,Liqi;Bo,Hong;Xin,Li;Huang,Weijuan;Dong,Libo;Zhao,Xiang;Lan,Yu;Li,Xiaodan;Shu,Yuelong
EPI509095	PB2	China	2013-Apr-29	EPI_ISL_157289	A/Fujian/03/2013		WHO Chinese National Influenza Center	Wang,Dayan;Gao,Rongbao;Yang,Lei;Li,Xiyan;Cheng,Yanhui;Zou,Shumei;Zhou,Jianfang;Zhu,Wenfei;Guo,Junfeng;Dong,Jie;Zhang,Ye;Liu,Liqi;Bo,Hong;Xin,Li;Huang,Weijuan;Dong,Libo;Zhao,Xiang;Lan,Yu;Li,Xiaodan;Shu,Yuelong
EPI509094	PB2	China	2013-Apr-27	EPI_ISL_157288	A/Fujian/02/2013		WHO Chinese National Influenza Center	Wang,Dayan;Gao,Rongbao;Yang,Lei;Li,Xiyan;Cheng,Yanhui;Zou,Shumei;Zhou,Jianfang;Zhu,Wenfei;Guo,Junfeng;Dong,Jie;Zhang,Ye;Liu,Liqi;Bo,Hong;Xin,Li;Huang,Weijuan;Dong,Libo;Zhao,Xiang;Lan,Yu;Li,Xiaodan;Shu,Yuelong
EPI509079	PB2	China	2013-Apr-01	EPI_ISL_157287	A/Anhui/04/2013		WHO Chinese National Influenza Center	Wang,Dayan;Gao,Rongbao;Yang,Lei;Li,Xiyan;Cheng,Yanhui;Zou,Shumei;Zhou,Jianfang;Zhu,Wenfei;Guo,Junfeng;Dong,Jie;Zhang,Ye;Liu,Liqi;Bo,Hong;Xin,Li;Huang,Weijuan;Dong,Libo;Zhao,Xiang;Lan,Yu;Li,Xiaodan;Shu,Yuelong
EPI509078	PB2	China	2013-May-27	EPI_ISL_157286	A/Beijing/02/2013		WHO Chinese National Influenza Center	Wang,Dayan;Gao,Rongbao;Yang,Lei;Li,Xiyan;Cheng,Yanhui;Zou,Shumei;Zhou,Jianfang;Zhu,Wenfei;Guo,Junfeng;Dong,Jie;Zhang,Ye;Liu,Liqi;Bo,Hong;Xin,Li;Huang,Weijuan;Dong,Libo;Zhao,Xiang;Lan,Yu;Li,Xiaodan;Shu,Yuelong
EPI509063	PB2	China	2013-Apr-29	EPI_ISL_157285	A/Hunan/0070/2013		WHO Chinese National Influenza Center	Wang,Dayan;Gao,Rongbao;Yang,Lei;Li,Xiyan;Cheng,Yanhui;Zou,Shumei;Zhou,Jianfang;Zhu,Wenfei;Guo,Junfeng;Dong,Jie;Zhang,Ye;Liu,Liqi;Bo,Hong;Xin,Li;Huang,Weijuan;Dong,Libo;Zhao,Xiang;Lan,Yu;Li,Xiaodan;Shu,Yuelong
EPI509055	PB2	China	2013-Apr-23	EPI_ISL_157284	A/Henan/02/2013		WHO Chinese National Influenza Center	Wang,Dayan;Gao,Rongbao;Yang,Lei;Li,Xiyan;Cheng,Yanhui;Zou,Shumei;Zhou,Jianfang;Zhu,Wenfei;Guo,Junfeng;Dong,Jie;Zhang,Ye;Liu,Liqi;Bo,Hong;Xin,Li;Huang,Weijuan;Dong,Libo;Zhao,Xiang;Lan,Yu;Li,Xiaodan;Shu,Yuelong
EPI503496	PB2	China	2013-Aug-08	EPI_ISL_154827	A/Huizhou/01/2013		Import from public-domain	Guan,D.; Zhang,X.; Zou,L.; Wu,J.; Xiao,H.; Ni,H.; Liang,L.; Zeng,X.; Ke,C.
EPI498797	PB2	Hong Kong (SAR)	2014-Jan-07	EPI_ISL_153338	A/Hong Kong/734/2014	Hong Kong Department of Health	Hong Kong Department of Health	Mak,G.C.; Cheng,P.K.C.; Lo,J.Y.C.
EPI498095	PB2	China	2013-Apr-25	EPI_ISL_153078	A/Xuzhou/1/2013		Import from public-domain	Guo,X.; Cui,L.; Zhao,K.; Qi,X.; Yu,H.; Zhou,M.; Shi,Z.; Ge,Y.; Wang,H.; Tang,F.
EPI497915	PB2	China	2013-Apr-13	EPI_ISL_153013	A/Nanjing/7/2013		Import from public-domain	Guo,X.; Cui,L.; Zhao,K.; Qi,X.; Zhu,Y.; Shi,Z.; Tang,F.; Zhou,M.; Wang,H.
EPI497907	PB2	China	2013-Apr-12	EPI_ISL_153012	A/Suzhou/5/2013		Import from public-domain	Guo,X.; Cui,L.; Zhao,K.; Qi,X.; Zhu,Y.; Shi,Z.; Tang,F.; Zhou,M.; Wang,H.
EPI497899	PB2	China	2013-Apr-11	EPI_ISL_153011	A/Nanjing/6/2013		Import from public-domain	Guo,X.; Cui,L.; Zhao,K.; Qi,X.; Zhu,Y.; Shi,Z.; Tang,F.; Zhou,M.; Wang,H.
EPI497891	PB2	China	2013-Apr-09	EPI_ISL_153010	A/Suzhou/3/2013		Import from public-domain	Guo,X.; Cui,L.; Zhao,K.; Qi,X.; Zhu,Y.; Shi,Z.; Tang,F.; Zhou,M.; Wang,H.
EPI497870	PB2	China	2013-Apr-07	EPI_ISL_153009	A/Wuxi/4/2013		Import from public-domain	Guo,X.; Cui,L.; Zhao,K.; Qi,X.; Zhu,Y.; Shi,Z.; Tang,F.; Zhou,M.; Wang,H.
EPI497862	PB2	China	2013-Apr-07	EPI_ISL_153008	A/Wuxi/3/2013		Import from public-domain	Guo,X.; Cui,L.; Zhao,K.; Qi,X.; Zhu,Y.; Shi,Z.; Tang,F.; Zhou,M.; Wang,H.
EPI497854	PB2	China	2013-Apr-07	EPI_ISL_153007	A/Zhenjiang/1/2013		Import from public-domain	Guo,X.; Cui,L.; Zhao,K.; Qi,X.; Zhu,Y.; Shi,Z.; Tang,F.; Zhou,M.; Wang,H.
EPI497819	PB2	China	2013-Apr-07	EPI_ISL_153004	A/Nanjing/4/2013		Import from public-domain	Guo,X.; Cui,L.; Zhao,K.; Qi,X.; Zhu,Y.; Shi,Z.; Tang,F.; Zhou,M.; Wang,H.
EPI497811	PB2	China	2013-Apr-05	EPI_ISL_153003	A/Nanjing/2/2013		Import from public-domain	Guo,X.; Cui,L.; Zhao,K.; Qi,X.; Zhu,Y.; Shi,Z.; Tang,F.; Zhou,M.; Wang,H.
EPI490879	PB2	Hong Kong (SAR)	2013-Nov-30	EPI_ISL_151417	A/Hong Kong/5942/2013	Hong Kong Department of Health	Hong Kong Department of Health	Mak,G.C.; Cheng,P.K.C.; Lo,J.Y.C.
EPI482857	PB2	China	2013-Oct-14	EPI_ISL_148744	A/Zhejiang/DTID-ZJU10/2013	The First Affiliated Hospital, College of Medicine, Zhejiang University	Shanghai Zhijiang Biotechnology Co.,Ltd	Chen,Yu; Cui,Da-wei; Zheng,Shu-fa; Yu,Fei; Yang,Shi-gui; Yao,Hang-ping; Chen,Hong-lin; Yuen,Kwok-yung; Li,Lan-juan
EPI477446	PB2	China	2013-Oct-14	EPI_ISL_148744	A/Zhejiang/DTID-ZJU10/2013	The First Affiliated Hospital, College of Medicine, Zhejiang University	Shanghai Zhijiang Biotechnology Co.,Ltd	Chen,Yu; Cui,Da-wei; Zheng,Shu-fa; Yu,Fei; Yang,Shi-gui; Yao,Hang-ping; Chen,Hong-lin; Yuen,Kwok-yung; Li,Lan-juan
EPI477407	PB2	China	2013-Oct-14	EPI_ISL_148728	A/Zhejiang/22/2013	Zhejiang Provincial Center for Disease Control and Prevention	Zhejiang Provincial Center for Disease Control and Prevention	Sun, Y; Zhang, YJ
EPI477399	PB2	China	2013-Apr-24	EPI_ISL_148727	A/Zhejiang/20/2013	Zhejiang Provincial Center for Disease Control and Prevention	Zhejiang Provincial Center for Disease Control and Prevention	Sun, Y; Zhang, YJ
EPI477322	PB2	China	2013-Apr-29	EPI_ISL_148697	A/Changsha/2/2013		Import from public-domain	Zhang,R.S.; Ou,X.H.; Yuan,J.; Chen,J.F.
EPI477321	PB2	China	2013-Mar-22	EPI_ISL_148696	A/Changsha/1/2013		Import from public-domain	Zhang,R.S.; Ou,X.H.; Yuan,J.; Chen,J.F.
EPI457430	PB2	China	2013-Apr-28	EPI_ISL_142858	A/Shandong/0068A/2013		WHO Chinese National Influenza Center	Wang,Dayan;Gao,Rongbao;Yang,Lei;Li,Xiyan;Cheng,Yanhui;Zou,Shumei;Zhou,Jianfang;Zhu,Wenfei;Guo,Junfeng;Dong,Jie;Zhang,Ye;Liu,Liqi;Bo,Hong;Xin,Li;Huang,Weijuan;Dong,Libo;Zhao,Xiang;Lan,Yu;Li,Xiaodan;Shu,Yuelong
EPI447637	PB2	China	2013-Apr-21	EPI_ISL_141191	A/Anhui/03/2013		WHO Chinese National Influenza Center	Wang,Dayan;Gao,Rongbao;Yang,Lei;Zhou,Shumei;Li,Xiyan;Zhou,Jianfang;Zhu,Wenfei;Guo,Junfeng;Li,Xiaodan;Dong,Jie;Huang,Weijuan;Zhang,Ye;Dong,Libo;Zhao,Xiang;Lu,Jian;Lan,Yu;Shu,Yuelong
EPI447644	PB2	China	2013-Apr-14	EPI_ISL_141190	A/Anhui/02/2013		WHO Chinese National Influenza Center	Wang,Dayan;Gao,Rongbao;Yang,Lei;Zhou,Shumei;Li,Xiyan;Zhou,Jianfang;Zhu,Wenfei;Guo,Junfeng;Li,Xiaodan;Dong,Jie;Huang,Weijuan;Zhang,Ye;Dong,Libo;Zhao,Xiang;Lu,Jian;Lan,Yu;Shu,Yuelong
EPI447658	PB2	China	2013-Apr-09	EPI_ISL_141188	A/Jiangsu/09/2013		WHO Chinese National Influenza Center	Wang,Dayan;Gao,Rongbao;Yang,Lei;Zhou,Shumei;Li,Xiyan;Zhou,Jianfang;Zhu,Wenfei;Guo,Junfeng;Li,Xiaodan;Dong,Jie;Huang,Weijuan;Zhang,Ye;Dong,Libo;Zhao,Xiang;Lu,Jian;Lan,Yu;Shu,Yuelong
EPI447665	PB2	China	2013-Apr-11	EPI_ISL_141187	A/Jiangsu/08/2013		WHO Chinese National Influenza Center	Wang,Dayan;Gao,Rongbao;Yang,Lei;Zhou,Shumei;Li,Xiyan;Zhou,Jianfang;Zhu,Wenfei;Guo,Junfeng;Li,Xiaodan;Dong,Jie;Huang,Weijuan;Zhang,Ye;Dong,Libo;Zhao,Xiang;Lu,Jian;Lan,Yu;Shu,Yuelong
EPI447672	PB2	China	2013-Apr-03	EPI_ISL_141186	A/Jiangsu/07/2013		WHO Chinese National Influenza Center	Wang,Dayan;Gao,Rongbao;Yang,Lei;Zhou,Shumei;Li,Xiyan;Zhou,Jianfang;Zhu,Wenfei;Guo,Junfeng;Li,Xiaodan;Dong,Jie;Huang,Weijuan;Zhang,Ye;Dong,Libo;Zhao,Xiang;Lu,Jian;Lan,Yu;Shu,Yuelong
EPI447679	PB2	China	2013-Apr-10	EPI_ISL_141185	A/Jiangsu/06/2013		WHO Chinese National Influenza Center	Wang,Dayan;Gao,Rongbao;Yang,Lei;Zhou,Shumei;Li,Xiyan;Zhou,Jianfang;Zhu,Wenfei;Guo,Junfeng;Li,Xiaodan;Dong,Jie;Huang,Weijuan;Zhang,Ye;Dong,Libo;Zhao,Xiang;Lu,Jian;Lan,Yu;Shu,Yuelong
EPI447686	PB2	China	2013-Apr-08	EPI_ISL_141184	A/Jiangsu/05/2013		WHO Chinese National Influenza Center	Wang,Dayan;Gao,Rongbao;Yang,Lei;Zhou,Shumei;Li,Xiyan;Zhou,Jianfang;Zhu,Wenfei;Guo,Junfeng;Li,Xiaodan;Dong,Jie;Huang,Weijuan;Zhang,Ye;Dong,Libo;Zhao,Xiang;Lu,Jian;Lan,Yu;Shu,Yuelong
EPI447693	PB2	China	2013-Apr-25	EPI_ISL_141183	A/Hunan/02/2013		WHO Chinese National Influenza Center	Wang,Dayan;Gao,Rongbao;Yang,Lei;Zhou,Shumei;Li,Xiyan;Zhou,Jianfang;Zhu,Wenfei;Guo,Junfeng;Li,Xiaodan;Dong,Jie;Huang,Weijuan;Zhang,Ye;Dong,Libo;Zhao,Xiang;Lu,Jian;Lan,Yu;Shu,Yuelong
EPI447700	PB2	China	2013-Apr-24	EPI_ISL_141182	A/Hunan/01/2013		WHO Chinese National Influenza Center	Wang,Dayan;Gao,Rongbao;Yang,Lei;Zhou,Shumei;Li,Xiyan;Zhou,Jianfang;Zhu,Wenfei;Guo,Junfeng;Li,Xiaodan;Dong,Jie;Huang,Weijuan;Zhang,Ye;Dong,Libo;Zhao,Xiang;Lu,Jian;Lan,Yu;Shu,Yuelong
EPI447707	PB2	China	2013-Apr-24	EPI_ISL_141181	A/Jiangxi/01/2013		WHO Chinese National Influenza Center	Wang,Dayan;Gao,Rongbao;Yang,Lei;Zhou,Shumei;Li,Xiyan;Zhou,Jianfang;Zhu,Wenfei;Guo,Junfeng;Li,Xiaodan;Dong,Jie;Huang,Weijuan;Zhang,Ye;Dong,Libo;Zhao,Xiang;Lu,Jian;Lan,Yu;Shu,Yuelong
EPI447714	PB2	China	2013-Apr-23	EPI_ISL_141180	A/Fujian/01/2013		WHO Chinese National Influenza Center	Wang,Dayan;Gao,Rongbao;Yang,Lei;Zhou,Shumei;Li,Xiyan;Zhou,Jianfang;Zhu,Wenfei;Guo,Junfeng;Li,Xiaodan;Dong,Jie;Huang,Weijuan;Zhang,Ye;Dong,Libo;Zhao,Xiang;Lu,Jian;Lan,Yu;Shu,Yuelong
EPI447721	PB2	China	2013-Apr-21	EPI_ISL_141179	A/Shandong/01/2013		WHO Chinese National Influenza Center	Wang,Dayan;Gao,Rongbao;Yang,Lei;Zhou,Shumei;Li,Xiyan;Zhou,Jianfang;Zhu,Wenfei;Guo,Junfeng;Li,Xiaodan;Dong,Jie;Huang,Weijuan;Zhang,Ye;Dong,Libo;Zhao,Xiang;Lu,Jian;Lan,Yu;Shu,Yuelong
EPI447728	PB2	China	2013-Apr-16	EPI_ISL_141178	A/Henan/01/2013		WHO Chinese National Influenza Center	Wang,Dayan;Gao,Rongbao;Yang,Lei;Zhou,Shumei;Li,Xiyan;Zhou,Jianfang;Zhu,Wenfei;Guo,Junfeng;Li,Xiaodan;Dong,Jie;Huang,Weijuan;Zhang,Ye;Dong,Libo;Zhao,Xiang;Lu,Jian;Lan,Yu;Shu,Yuelong
EPI447735	PB2	China	2013-Apr-10	EPI_ISL_141177	A/Shanghai/16/2013		WHO Chinese National Influenza Center	Wang,Dayan;Gao,Rongbao;Yang,Lei;Zhou,Shumei;Li,Xiyan;Zhou,Jianfang;Zhu,Wenfei;Guo,Junfeng;Li,Xiaodan;Dong,Jie;Huang,Weijuan;Zhang,Ye;Dong,Libo;Zhao,Xiang;Lu,Jian;Lan,Yu;Shu,Yuelong
EPI447742	PB2	China	2013-Apr-09	EPI_ISL_141176	A/Shanghai/15/2013		WHO Chinese National Influenza Center	Wang,Dayan;Gao,Rongbao;Yang,Lei;Zhou,Shumei;Li,Xiyan;Zhou,Jianfang;Zhu,Wenfei;Guo,Junfeng;Li,Xiaodan;Dong,Jie;Huang,Weijuan;Zhang,Ye;Dong,Libo;Zhao,Xiang;Lu,Jian;Lan,Yu;Shu,Yuelong
EPI447749	PB2	China	2013-Apr-03	EPI_ISL_141175	A/Zhejiang/02/2013		WHO Chinese National Influenza Center	Wang,Dayan;Gao,Rongbao;Yang,Lei;Zhou,Shumei;Li,Xiyan;Zhou,Jianfang;Zhu,Wenfei;Guo,Junfeng;Li,Xiaodan;Dong,Jie;Huang,Weijuan;Zhang,Ye;Dong,Libo;Zhao,Xiang;Lu,Jian;Lan,Yu;Shu,Yuelong
EPI447756	PB2	China	2013-Apr-08	EPI_ISL_141174	A/Shanghai/9/2013		WHO Chinese National Influenza Center	Wang,Dayan;Gao,Rongbao;Yang,Lei;Zhou,Shumei;Li,Xiyan;Zhou,Jianfang;Zhu,Wenfei;Guo,Junfeng;Li,Xiaodan;Dong,Jie;Huang,Weijuan;Zhang,Ye;Dong,Libo;Zhao,Xiang;Lu,Jian;Lan,Yu;Shu,Yuelong
EPI447763	PB2	China	2013-Apr-07	EPI_ISL_141173	A/Shanghai/8/2013		WHO Chinese National Influenza Center	Wang,Dayan;Gao,Rongbao;Yang,Lei;Zhou,Shumei;Li,Xiyan;Zhou,Jianfang;Zhu,Wenfei;Guo,Junfeng;Li,Xiaodan;Dong,Jie;Huang,Weijuan;Zhang,Ye;Dong,Libo;Zhao,Xiang;Lu,Jian;Lan,Yu;Shu,Yuelong
EPI447770	PB2	China	2013-Apr-03	EPI_ISL_141172	A/Shanghai/17/2013		WHO Chinese National Influenza Center	Wang,Dayan;Gao,Rongbao;Yang,Lei;Zhou,Shumei;Li,Xiyan;Zhou,Jianfang;Zhu,Wenfei;Guo,Junfeng;Li,Xiaodan;Dong,Jie;Huang,Weijuan;Zhang,Ye;Dong,Libo;Zhao,Xiang;Lu,Jian;Lan,Yu;Shu,Yuelong
EPI447778	PB2	China	2013-Apr-10	EPI_ISL_141171	A/Shanghai/14/2013		WHO Chinese National Influenza Center	Wang,Dayan;Gao,Rongbao;Yang,Lei;Zhou,Shumei;Li,Xiyan;Zhou,Jianfang;Zhu,Wenfei;Guo,Junfeng;Li,Xiaodan;Dong,Jie;Huang,Weijuan;Zhang,Ye;Dong,Libo;Zhao,Xiang;Lu,Jian;Lan,Yu;Shu,Yuelong
EPI447785	PB2	China	2013-Apr-10	EPI_ISL_141170	A/Shanghai/13/2013		WHO Chinese National Influenza Center	Wang,Dayan;Gao,Rongbao;Yang,Lei;Zhou,Shumei;Li,Xiyan;Zhou,Jianfang;Zhu,Wenfei;Guo,Junfeng;Li,Xiaodan;Dong,Jie;Huang,Weijuan;Zhang,Ye;Dong,Libo;Zhao,Xiang;Lu,Jian;Lan,Yu;Shu,Yuelong
EPI447794	PB2	China	2013-Apr-10	EPI_ISL_141169	A/Shanghai/12/2013		WHO Chinese National Influenza Center	Wang,Dayan;Gao,Rongbao;Yang,Lei;Zhou,Shumei;Li,Xiyan;Zhou,Jianfang;Zhu,Wenfei;Guo,Junfeng;Li,Xiaodan;Dong,Jie;Huang,Weijuan;Zhang,Ye;Dong,Libo;Zhao,Xiang;Lu,Jian;Lan,Yu;Shu,Yuelong
EPI447802	PB2	China	2013-Apr-10	EPI_ISL_141168	A/Shanghai/11/2013		WHO Chinese National Influenza Center	Wang,Dayan;Gao,Rongbao;Yang,Lei;Zhou,Shumei;Li,Xiyan;Zhou,Jianfang;Zhu,Wenfei;Guo,Junfeng;Li,Xiaodan;Dong,Jie;Huang,Weijuan;Zhang,Ye;Dong,Libo;Zhao,Xiang;Lu,Jian;Lan,Yu;Shu,Yuelong
EPI447810	PB2	China	2013-Apr-09	EPI_ISL_141167	A/Shanghai/10/2013		WHO Chinese National Influenza Center	Wang,Dayan;Gao,Rongbao;Yang,Lei;Zhou,Shumei;Li,Xiyan;Zhou,Jianfang;Zhu,Wenfei;Guo,Junfeng;Li,Xiaodan;Dong,Jie;Huang,Weijuan;Zhang,Ye;Dong,Libo;Zhao,Xiang;Lu,Jian;Lan,Yu;Shu,Yuelong
EPI447824	PB2	China	2013-Apr-10	EPI_ISL_141166	A/Shanghai/06-A/2013		WHO Chinese National Influenza Center	Wang,Dayan;Gao,Rongbao;Yang,Lei;Zhou,Shumei;Li,Xiyan;Zhou,Jianfang;Zhu,Wenfei;Guo,Junfeng;Li,Xiaodan;Dong,Jie;Huang,Weijuan;Zhang,Ye;Dong,Libo;Zhao,Xiang;Lu,Jian;Lan,Yu;Shu,Yuelong
EPI447837	PB2	China	2013-Apr-12	EPI_ISL_141165	A/Beijing/01-A/2013		WHO Chinese National Influenza Center	Wang,Dayan;Gao,Rongbao;Yang,Lei;Zhou,Shumei;Li,Xiyan;Zhou,Jianfang;Zhu,Wenfei;Guo,Junfeng;Li,Xiaodan;Dong,Jie;Huang,Weijuan;Zhang,Ye;Dong,Libo;Zhao,Xiang;Lu,Jian;Lan,Yu;Shu,Yuelong
EPI447852	PB2	China	2013-Apr-05	EPI_ISL_141164	A/Jiangsu/04/2013		WHO Chinese National Influenza Center	Wang,Dayan;Gao,Rongbao;Yang,Lei;Zhou,Shumei;Li,Xiyan;Zhou,Jianfang;Zhu,Wenfei;Guo,Junfeng;Li,Xiaodan;Dong,Jie;Huang,Weijuan;Zhang,Ye;Dong,Libo;Zhao,Xiang;Lu,Jian;Lan,Yu;Shu,Yuelong
EPI447865	PB2	China	2013-Apr-06	EPI_ISL_141163	A/jiangsu/03/2013		WHO Chinese National Influenza Center	Wang,Dayan;Gao,Rongbao;Yang,Lei;Zhou,Shumei;Li,Xiyan;Zhou,Jianfang;Zhu,Wenfei;Guo,Junfeng;Li,Xiaodan;Dong,Jie;Huang,Weijuan;Zhang,Ye;Dong,Libo;Zhao,Xiang;Lu,Jian;Lan,Yu;Shu,Yuelong
EPI447877	PB2	China	2013-Mar-31	EPI_ISL_141162	A/Jiangsu/02/2013		WHO Chinese National Influenza Center	Wang,Dayan;Gao,Rongbao;Yang,Lei;Zhou,Shumei;Li,Xiyan;Zhou,Jianfang;Zhu,Wenfei;Guo,Junfeng;Li,Xiaodan;Dong,Jie;Huang,Weijuan;Zhang,Ye;Dong,Libo;Zhao,Xiang;Lu,Jian;Lan,Yu;Shu,Yuelong
EPI447898	PB2	China	2013-Mar-18	EPI_ISL_141160	A/Shanghai/07/2013		WHO Chinese National Influenza Center	Wang,Dayan;Gao,Rongbao;Yang,Lei;Zhou,Shumei;Li,Xiyan;Zhou,Jianfang;Zhu,Wenfei;Guo,Junfeng;Li,Xiaodan;Dong,Jie;Huang,Weijuan;Zhang,Ye;Dong,Libo;Zhao,Xiang;Lu,Jian;Lan,Yu;Shu,Yuelong
EPI447911	PB2	China	2013-Apr-02	EPI_ISL_141159	A/shanghai/05/2013		WHO Chinese National Influenza Center	Wang,Dayan;Gao,Rongbao;Yang,Lei;Zhou,Shumei;Li,Xiyan;Zhou,Jianfang;Zhu,Wenfei;Guo,Junfeng;Li,Xiaodan;Dong,Jie;Huang,Weijuan;Zhang,Ye;Dong,Libo;Zhao,Xiang;Lu,Jian;Lan,Yu;Shu,Yuelong
EPI447922	PB2	China	2013-Mar-30	EPI_ISL_141158	A/Jiangsu/01/2013		WHO Chinese National Influenza Center	Wang,Dayan;Gao,Rongbao;Yang,Lei;Zhou,Shumei;Li,Xiyan;Zhou,Jianfang;Zhu,Wenfei;Guo,Junfeng;Li,Xiaodan;Dong,Jie;Huang,Weijuan;Zhang,Ye;Dong,Libo;Zhao,Xiang;Lu,Jian;Lan,Yu;Shu,Yuelong
EPI446963	PB2	China	2013-Mar-05	EPI_ISL_140924	A/Shanghai/4664T/2013		Import from public-domain	Hu,Y.
EPI441601	PB2	China	2013-Mar-24	EPI_ISL_138977	A/Hangzhou/1/2013	Hangzhou Center for Disease Control and Prevention	Hangzhou Center for Disease Control and Prevention	Li,J; Sun,YX; Pu,XY; Yu,XF; Chen,QJ; Kou,Y; Ding,SJ; Zhou,YY; Pan,JC
EPI439504	PB2	China	2013-Mar-20	EPI_ISL_138739	A/Anhui/1/2013		WHO Chinese National Influenza Center
EPI439495	PB2	China	2013-Mar-05	EPI_ISL_138738	A/Shanghai/2/2013		WHO Chinese National Influenza Center
EPI439488	PB2	China	2013-Feb-26	EPI_ISL_138737	A/Shanghai/1/2013		WHO Chinese National Influenza Center
EPI917063	PB1	Taiwan	2017-Feb-03	EPI_ISL_248778	A/Taiwan/1/2017		Centers for Disease Control, R.O.C. (Taiwan)
EPI887970	PB1	China	2016-Dec-16	EPI_ISL_242887	A/Jiangsu/60447/2016		WHO Chinese National Influenza Center	Wang,Dayan;Zhou,Shumei;Li,Xiyan;Li,Xiaodan;Zhang,Ye;Bo,Hong;Shu,Yuelong
EPI887962	PB1	China	2016-Dec-19	EPI_ISL_242886	A/Jiangsu/60450/2016		WHO Chinese National Influenza Center	Wang,Dayan;Zhou,Shumei;Li,Xiyan;Li,Xiaodan;Zhang,Ye;Bo,Hong;Shu,Yuelong
EPI887954	PB1	China	2016-Dec-19	EPI_ISL_242885	A/Jiangsu/60451/2016		WHO Chinese National Influenza Center	Wang,Dayan;Zhou,Shumei;Li,Xiyan;Li,Xiaodan;Zhang,Ye;Bo,Hong;Shu,Yuelong
EPI887938	PB1	China	2016-Nov-25	EPI_ISL_242883	A/Jiangsu/60454/2016		WHO Chinese National Influenza Center	Wang,Dayan;Zhou,Shumei;Li,Xiyan;Li,Xiaodan;Zhang,Ye;Bo,Hong;Shu,Yuelong
EPI887930	PB1	China	2016-Dec-02	EPI_ISL_242882	A/Jiangsu/60456/2016		WHO Chinese National Influenza Center	Wang,Dayan;Zhou,Shumei;Li,Xiyan;Li,Xiaodan;Zhang,Ye;Bo,Hong;Shu,Yuelong
EPI887922	PB1	China	2016-Dec-06	EPI_ISL_242881	A/Jiangsu/60457/2016		WHO Chinese National Influenza Center	Wang,Dayan;Zhou,Shumei;Li,Xiyan;Li,Xiaodan;Zhang,Ye;Bo,Hong;Shu,Yuelong
EPI887914	PB1	China	2016-Dec-10	EPI_ISL_242880	A/Jiangsu/60458/2016		WHO Chinese National Influenza Center	Wang,Dayan;Zhou,Shumei;Li,Xiyan;Li,Xiaodan;Zhang,Ye;Bo,Hong;Shu,Yuelong
EPI887906	PB1	China	2016-Dec-12	EPI_ISL_242879	A/Jiangsu/60459/2016		WHO Chinese National Influenza Center	Wang,Dayan;Zhou,Shumei;Li,Xiyan;Li,Xiaodan;Zhang,Ye;Bo,Hong;Shu,Yuelong
EPI887898	PB1	China	2016-Dec-13	EPI_ISL_242878	A/Jiangsu/60460/2016		WHO Chinese National Influenza Center	Wang,Dayan;Zhou,Shumei;Li,Xiyan;Li,Xiaodan;Zhang,Ye;Bo,Hong;Shu,Yuelong
EPI887890	PB1	China	2016-Dec-20	EPI_ISL_242877	A/Jiangsu/60461/2016		WHO Chinese National Influenza Center	Wang,Dayan;Zhou,Shumei;Li,Xiyan;Li,Xiaodan;Zhang,Ye;Bo,Hong;Shu,Yuelong
EPI887882	PB1	China	2016-Dec-16	EPI_ISL_242876	A/Jiangsu/60462/2016		WHO Chinese National Influenza Center	Wang,Dayan;Zhou,Shumei;Li,Xiyan;Li,Xiaodan;Zhang,Ye;Bo,Hong;Shu,Yuelong
EPI887874	PB1	China	2016-Nov-15	EPI_ISL_242875	A/Jiangsu/60463/2016		WHO Chinese National Influenza Center	Wang,Dayan;Zhou,Shumei;Li,Xiyan;Li,Xiaodan;Zhang,Ye;Bo,Hong;Shu,Yuelong
EPI887866	PB1	China	2016-Dec-09	EPI_ISL_242874	A/Jiangsu/60465/2016		WHO Chinese National Influenza Center	Wang,Dayan;Zhou,Shumei;Li,Xiyan;Li,Xiaodan;Zhang,Ye;Bo,Hong;Shu,Yuelong
EPI887858	PB1	China	2016-Oct-26	EPI_ISL_242873	A/Jiangsu/60467/2016		WHO Chinese National Influenza Center	Wang,Dayan;Zhou,Shumei;Li,Xiyan;Li,Xiaodan;Zhang,Ye;Bo,Hong;Shu,Yuelong
EPI887850	PB1	China	2016-Nov-20	EPI_ISL_242872	A/Fujian/56600/2016	Fujian Provincial Center for Disease Control and Prevention	WHO Chinese National Influenza Center	Wang,Dayan;Zhou,Shumei;Li,Xiyan;Li,Xiaodan;Zhang,Ye;Bo,Hong;Shu,Yuelong
EPI887842	PB1	China	2016-Dec-09	EPI_ISL_242871	A/Guangdong/60060/2016	Guangdong Provincial Center for Disease Control and Prevention	WHO Chinese National Influenza Center	Wang,Dayan;Zhou,Shumei;Li,Xiyan;Li,Xiaodan;Zhang,Ye;Bo,Hong;Shu,Yuelong
EPI887834	PB1	China	2016-Dec-28	EPI_ISL_242870	A/Guangdong/60923/2016	Guangdong Provincial Center for Disease Control and Prevention	WHO Chinese National Influenza Center	Wang,Dayan;Zhou,Shumei;Li,Xiyan;Li,Xiaodan;Zhang,Ye;Bo,Hong;Shu,Yuelong
EPI887826	PB1	China	2016-Nov-21	EPI_ISL_242869	A/Jiangsu/60466/2016		WHO Chinese National Influenza Center	Wang,Dayan;Zhou,Shumei;Li,Xiyan;Li,Xiaodan;Zhang,Ye;Bo,Hong;Shu,Yuelong
EPI887818	PB1	China	2016-Dec-27	EPI_ISL_242868	A/Hunan/00001/2016		WHO Chinese National Influenza Center	Wang,Dayan;Zhou,Shumei;Li,Xiyan;Li,Xiaodan;Zhang,Ye;Bo,Hong;Shu,Yuelong
EPI887810	PB1	China	2017-Jan-01	EPI_ISL_242867	A/Zhejiang/3/2017	Zhejiang Provincial Center for Disease Control and Prevention	WHO Chinese National Influenza Center	Wang,Dayan;Zhou,Shumei;Li,Xiyan;Li,Xiaodan;Zhang,Ye;Bo,Hong;Shu,Yuelong
EPI887802	PB1	China	2016-Oct-07	EPI_ISL_242866	A/Zhejiang/6/2016	Zhejiang Provincial Center for Disease Control and Prevention	WHO Chinese National Influenza Center	Wang,Dayan;Zhou,Shumei;Li,Xiyan;Li,Xiaodan;Zhang,Ye;Bo,Hong;Shu,Yuelong
EPI887794	PB1	China	2016-Dec-11	EPI_ISL_242865	A/Zhejiang/8/2016	Zhejiang Provincial Center for Disease Control and Prevention	WHO Chinese National Influenza Center	Wang,Dayan;Zhou,Shumei;Li,Xiyan;Li,Xiaodan;Zhang,Ye;Bo,Hong;Shu,Yuelong
EPI887786	PB1	China	2016-Dec-12	EPI_ISL_242864	A/Zhejiang/9/2016	Zhejiang Provincial Center for Disease Control and Prevention	WHO Chinese National Influenza Center	Wang,Dayan;Zhou,Shumei;Li,Xiyan;Li,Xiaodan;Zhang,Ye;Bo,Hong;Shu,Yuelong
EPI887778	PB1	China	2016-Dec-18	EPI_ISL_242863	A/Zhejiang/10/2016	Zhejiang Provincial Center for Disease Control and Prevention	WHO Chinese National Influenza Center	Wang,Dayan;Zhou,Shumei;Li,Xiyan;Li,Xiaodan;Zhang,Ye;Bo,Hong;Shu,Yuelong
EPI887770	PB1	China	2016-Dec-21	EPI_ISL_242862	A/Zhejiang/11/2016	Zhejiang Provincial Center for Disease Control and Prevention	WHO Chinese National Influenza Center	Wang,Dayan;Zhou,Shumei;Li,Xiyan;Li,Xiaodan;Zhang,Ye;Bo,Hong;Shu,Yuelong
EPI887762	PB1	China	2016-Dec-25	EPI_ISL_242861	A/Zhejiang/12/2016	Zhejiang Provincial Center for Disease Control and Prevention	WHO Chinese National Influenza Center	Wang,Dayan;Zhou,Shumei;Li,Xiyan;Li,Xiaodan;Zhang,Ye;Bo,Hong;Shu,Yuelong
EPI887754	PB1	China	2016-Dec-24	EPI_ISL_242860	A/Zhejiang/13/2016	Zhejiang Provincial Center for Disease Control and Prevention	WHO Chinese National Influenza Center	Wang,Dayan;Zhou,Shumei;Li,Xiyan;Li,Xiaodan;Zhang,Ye;Bo,Hong;Shu,Yuelong
EPI887746	PB1	China	2016-Dec-23	EPI_ISL_242859	A/Zhejiang/14/2016	Zhejiang Provincial Center for Disease Control and Prevention	WHO Chinese National Influenza Center	Wang,Dayan;Zhou,Shumei;Li,Xiyan;Li,Xiaodan;Zhang,Ye;Bo,Hong;Shu,Yuelong
EPI887738	PB1	China	2016-Dec-21	EPI_ISL_242858	A/Zhejiang/15/2016	Zhejiang Provincial Center for Disease Control and Prevention	WHO Chinese National Influenza Center	Wang,Dayan;Zhou,Shumei;Li,Xiyan;Li,Xiaodan;Zhang,Ye;Bo,Hong;Shu,Yuelong
EPI887730	PB1	China	2016-Dec-21	EPI_ISL_242857	A/Zhejiang/16/2016	Zhejiang Provincial Center for Disease Control and Prevention	WHO Chinese National Influenza Center	Wang,Dayan;Zhou,Shumei;Li,Xiyan;Li,Xiaodan;Zhang,Ye;Bo,Hong;Shu,Yuelong
EPI887722	PB1	China	2017-Jan-07	EPI_ISL_242856	A/Zhejiang/1/2017	Zhejiang Provincial Center for Disease Control and Prevention	WHO Chinese National Influenza Center	Wang,Dayan;Zhou,Shumei;Li,Xiyan;Li,Xiaodan;Zhang,Ye;Bo,Hong;Shu,Yuelong
EPI887714	PB1	China	2017-Jan-04	EPI_ISL_242855	A/Zhejiang/2/2017	Zhejiang Provincial Center for Disease Control and Prevention	WHO Chinese National Influenza Center	Wang,Dayan;Zhou,Shumei;Li,Xiyan;Li,Xiaodan;Zhang,Ye;Bo,Hong;Shu,Yuelong
EPI887706	PB1	China	2016-Dec-05	EPI_ISL_242854	A/Zhejiang/7/2016	Zhejiang Provincial Center for Disease Control and Prevention	WHO Chinese National Influenza Center	Wang,Dayan;Zhou,Shumei;Li,Xiyan;Li,Xiaodan;Zhang,Ye;Bo,Hong;Shu,Yuelong
EPI887698	PB1	China	2016-Dec-31	EPI_ISL_242853	A/Zhejiang/17/2016	Zhejiang Provincial Center for Disease Control and Prevention	WHO Chinese National Influenza Center	Wang,Dayan;Zhou,Shumei;Li,Xiyan;Li,Xiaodan;Zhang,Ye;Bo,Hong;Shu,Yuelong
EPI887690	PB1	China	2016-Dec-27	EPI_ISL_242852	A/Zhejiang/18/2016	Zhejiang Provincial Center for Disease Control and Prevention	WHO Chinese National Influenza Center	Wang,Dayan;Zhou,Shumei;Li,Xiyan;Li,Xiaodan;Zhang,Ye;Bo,Hong;Shu,Yuelong
EPI887682	PB1	China	2017-Jan-05	EPI_ISL_242851	A/Zhejiang/4/2017	Zhejiang Provincial Center for Disease Control and Prevention	WHO Chinese National Influenza Center	Wang,Dayan;Zhou,Shumei;Li,Xiyan;Li,Xiaodan;Zhang,Ye;Bo,Hong;Shu,Yuelong
EPI887674	PB1	China	2016-Dec-28	EPI_ISL_242850	A/Zhejiang/19/2016	Zhejiang Provincial Center for Disease Control and Prevention	WHO Chinese National Influenza Center	Wang,Dayan;Zhou,Shumei;Li,Xiyan;Li,Xiaodan;Zhang,Ye;Bo,Hong;Shu,Yuelong
EPI887666	PB1	China	2016-Dec-30	EPI_ISL_242849	A/Zhejiang/20/2016	Zhejiang Provincial Center for Disease Control and Prevention	WHO Chinese National Influenza Center	Wang,Dayan;Zhou,Shumei;Li,Xiyan;Li,Xiaodan;Zhang,Ye;Bo,Hong;Shu,Yuelong
EPI887658	PB1	China	2017-Jan-02	EPI_ISL_242848	A/Zhejiang/5/2017	Zhejiang Provincial Center for Disease Control and Prevention	WHO Chinese National Influenza Center	Wang,Dayan;Zhou,Shumei;Li,Xiyan;Li,Xiaodan;Zhang,Ye;Bo,Hong;Shu,Yuelong
EPI887650	PB1	China	2017-Jan-05	EPI_ISL_242847	A/Zhejiang/6/2017	Zhejiang Provincial Center for Disease Control and Prevention	WHO Chinese National Influenza Center	Wang,Dayan;Zhou,Shumei;Li,Xiyan;Li,Xiaodan;Zhang,Ye;Bo,Hong;Shu,Yuelong
EPI887642	PB1	China	2017-Jan-08	EPI_ISL_242846	A/Hunan/02285/2017		WHO Chinese National Influenza Center	Wang,Dayan;Zhou,Shumei;Li,Xiyan;Li,Xiaodan;Zhang,Ye;Bo,Hong;Shu,Yuelong
EPI887634	PB1	China	2017-Jan-11	EPI_ISL_242845	A/Hunan/02287/2017		WHO Chinese National Influenza Center	Wang,Dayan;Zhou,Shumei;Li,Xiyan;Li,Xiaodan;Zhang,Ye;Bo,Hong;Shu,Yuelong
EPI887626	PB1	China	2017-Jan-06	EPI_ISL_242844	A/Hunan/02286/2017		WHO Chinese National Influenza Center	Wang,Dayan;Zhou,Shumei;Li,Xiyan;Li,Xiaodan;Zhang,Ye;Bo,Hong;Shu,Yuelong
EPI887618	PB1	China	2017-Jan-06	EPI_ISL_242843	A/Fujian/02152/2017	Fujian Provincial Center for Disease Control and Prevention	WHO Chinese National Influenza Center	Wang,Dayan;Zhou,Shumei;Li,Xiyan;Li,Xiaodan;Zhang,Ye;Bo,Hong;Shu,Yuelong
EPI887610	PB1	China	2017-Jan-01	EPI_ISL_242842	A/Fujian/02151/2017	Fujian Provincial Center for Disease Control and Prevention	WHO Chinese National Influenza Center	Wang,Dayan;Zhou,Shumei;Li,Xiyan;Li,Xiaodan;Zhang,Ye;Bo,Hong;Shu,Yuelong
EPI884220	PB1	Hong Kong (SAR)	2017-Jan-09	EPI_ISL_242275	A/Hong Kong/214/2017	Hong Kong Department of Health	Hong Kong Department of Health	Mak,G.C.; Lo,J.Y.C.
EPI874336	PB1	Hong Kong (SAR)	2017-Jan-05	EPI_ISL_240829	A/Hong Kong/VB17002884/2017	Hong Kong Department of Health	Hong Kong Department of Health	Mak,G.C.; Lo,J.Y.C.
EPI872956	PB1	Hong Kong (SAR)	2016-Dec-28	EPI_ISL_240520	A/Hong Kong/VB16189623/2016	Hong Kong Department of Health	Hong Kong Department of Health	Mak,G.C.; Lo,J.Y.C.
EPI869671	PB1	Hong Kong (SAR)	2016-Dec-19	EPI_ISL_239994	A/Hong Kong/VB16184091/2016	Hong Kong Department of Health	Hong Kong Department of Health	Mak,G.C.; Lo,J.Y.C.
EPI833712	PB1	China	2016-Jan-15	EPI_ISL_233629	A/Fujian/3/2016	Fujian Provincial Center for Disease Control and Prevention	Fujian Center for Disease Control and Prevention
EPI833702	PB1	China	2016-Jan-13	EPI_ISL_233628	A/Fujian/1/2016	Fujian Provincial Center for Disease Control and Prevention	Fujian Center for Disease Control and Prevention
EPI769637	PB1	China	2015-Jan-17	EPI_ISL_223680	A/Fujian/22/2015		Fujian Center for Disease Control and Prevention
EPI769581	PB1	China	2015-Jan-15	EPI_ISL_223673	A/Fujian/18/2015		Fujian Center for Disease Control and Prevention
EPI769573	PB1		2015-Jan-15	EPI_ISL_223672	A/Fujian/16/2015		Fujian Center for Disease Control and Prevention
EPI769564	PB1		2015-Jan-14	EPI_ISL_223670	A/Fujian/10/2015	Fujian Provincial Center for Disease Control and Prevention	Fujian Center for Disease Control and Prevention
EPI740736	PB1	Hong Kong (SAR)	2016-Apr-19	EPI_ISL_217947	A/Hong Kong/VB16064646/2016	Hong Kong Department of Health	Hong Kong Department of Health	Mak,G.C.; Lo,J.Y.C.
EPI730493	PB1	Hong Kong (SAR)	2016-Mar-24	EPI_ISL_215688	A/Hong Kong/VB16049808/2016	Hong Kong Department of Health	Hong Kong Department of Health	Mak,G.C.; Lo,J.Y.C.
EPI729457	PB1	Taiwan	2014-Apr-24	EPI_ISL_215534	A/Taiwan/4-CGMH2/2014		Import from public-domain	Chen,G.W.; Kuo,S.M.; Yang,S.L.; Gong,Y.N.; Hsiao,M.R.; Liu,Y.C.; Shih,S.R.; Tsao,K.C.; Tsao,K.-C.; Shih,S.-R.; Chen,G.-W.; Yang,S.-L.; Hsiao,M.-J.; Kuo,S.-M.; Liu,Y.-C.
EPI729449	PB1	Taiwan	2014-Apr-24	EPI_ISL_215533	A/Taiwan/4-CGMH1/2014		Import from public-domain	Chen,G.W.; Kuo,S.M.; Yang,S.L.; Gong,Y.N.; Hsiao,M.R.; Liu,Y.C.; Shih,S.R.; Tsao,K.C.; Tsao,K.-C.; Shih,S.-R.; Chen,G.-W.; Yang,S.-L.; Hsiao,M.-J.; Kuo,S.-M.; Liu,Y.-C.
EPI656504	PB1	China	2015-Mar-10	EPI_ISL_198750	A/GD-120/2015/H7N9/2015-03-10	Guangdong Provincial Center for Disease Control and Prevention	Guangdong Provincial Center for Disease Control and Prevention
EPI656496	PB1	China	2015-Mar-05	EPI_ISL_198749	A/GD-95/2015/H7N9/2015-03-05	Guangdong Provincial Center for Disease Control and Prevention	Guangdong Provincial Center for Disease Control and Prevention
EPI656488	PB1	China	2015-Feb-26	EPI_ISL_198748	A/GD-124/2015/H7N9/2015-02-26	Guangdong Provincial Center for Disease Control and Prevention	Guangdong Provincial Center for Disease Control and Prevention
EPI656480	PB1	China	2015-Feb-26	EPI_ISL_198747	A/GD-91/2015/H7N9/2015-02-26	Guangdong Provincial Center for Disease Control and Prevention	Guangdong Provincial Center for Disease Control and Prevention
EPI656472	PB1	China	2015-Feb-26	EPI_ISL_198746	A/GD-92/2015/H7N9/2015-02-26	Guangdong Provincial Center for Disease Control and Prevention	Guangdong Provincial Center for Disease Control and Prevention
EPI656464	PB1	China	2015-Feb-10	EPI_ISL_198745	A/GD-76/2015/H7N9/2015-02-10	Guangdong Provincial Center for Disease Control and Prevention	Guangdong Provincial Center for Disease Control and Prevention
EPI656456	PB1	China	2015-Feb-10	EPI_ISL_198744	A/GD-81/2015/H7N9/2015-02-10	Guangdong Provincial Center for Disease Control and Prevention	Guangdong Provincial Center for Disease Control and Prevention
EPI656448	PB1	China	2015-Feb-10	EPI_ISL_198743	A/GD-80/2015/H7N9/2015-02-10	Guangdong Provincial Center for Disease Control and Prevention	Guangdong Provincial Center for Disease Control and Prevention
EPI656440	PB1	China	2015-Feb-08	EPI_ISL_198742	A/GD-68/2015/H7N9/2015-02-08	Guangdong Provincial Center for Disease Control and Prevention	Guangdong Provincial Center for Disease Control and Prevention
EPI656432	PB1	China	2015-Feb-07	EPI_ISL_198741	A/GD-72/2015/H7N9/2015-02-07	Guangdong Provincial Center for Disease Control and Prevention	Guangdong Provincial Center for Disease Control and Prevention
EPI656424	PB1	China	2015-Feb-04	EPI_ISL_198740	A/GD-69/2015/H7N9/2015-02-04	Guangdong Provincial Center for Disease Control and Prevention	Guangdong Provincial Center for Disease Control and Prevention
EPI656416	PB1	China	2015-Feb-03	EPI_ISL_198739	A/GD-57/2015/H7N9/2015-02-03	Guangdong Provincial Center for Disease Control and Prevention	Guangdong Provincial Center for Disease Control and Prevention
EPI656408	PB1	China	2015-Feb-03	EPI_ISL_198738	A/GD-53/2015/H7N9/2015-02-03	Guangdong Provincial Center for Disease Control and Prevention	Guangdong Provincial Center for Disease Control and Prevention
EPI656400	PB1	China	2015-Jan-30	EPI_ISL_198737	A/GD-51/2015/H7N9/2015-01-30	Guangdong Provincial Center for Disease Control and Prevention	Guangdong Provincial Center for Disease Control and Prevention
EPI656392	PB1	China	2015-Jan-27	EPI_ISL_198736	A/GD-50/2015/H7N9/2015-01-27	Guangdong Provincial Center for Disease Control and Prevention	Guangdong Provincial Center for Disease Control and Prevention
EPI656384	PB1	China	2015-Jan-27	EPI_ISL_198735	A/GD-55/2015/H7N9/2015-01-27	Guangdong Provincial Center for Disease Control and Prevention	Guangdong Provincial Center for Disease Control and Prevention
EPI656376	PB1	China	2015-Jan-27	EPI_ISL_198734	A/GD-54/2015/H7N9/2015-01-27	Guangdong Provincial Center for Disease Control and Prevention	Guangdong Provincial Center for Disease Control and Prevention
EPI656368	PB1	China	2015-Jan-26	EPI_ISL_198733	A/GD-45/2015/H7N9/2015-01-26	Guangdong Provincial Center for Disease Control and Prevention	Guangdong Provincial Center for Disease Control and Prevention
EPI656360	PB1	China	2015-Jan-25	EPI_ISL_198732	A/GD-42/2015/H7N9/2015-01-25	Guangdong Provincial Center for Disease Control and Prevention	Guangdong Provincial Center for Disease Control and Prevention
EPI656352	PB1	China	2015-Jan-22	EPI_ISL_198731	A/GD-30/2015/H7N9/2015-01-22	Guangdong Provincial Center for Disease Control and Prevention	Guangdong Provincial Center for Disease Control and Prevention
EPI656344	PB1	China	2015-Jan-22	EPI_ISL_198730	A/GD-43/2015/H7N9/2015-01-22	Guangdong Provincial Center for Disease Control and Prevention	Guangdong Provincial Center for Disease Control and Prevention
EPI656336	PB1	China	2015-Jan-21	EPI_ISL_198729	A/GD-27/2015/H7N9/2015-01-21	Guangdong Provincial Center for Disease Control and Prevention	Guangdong Provincial Center for Disease Control and Prevention
EPI656328	PB1	China	2015-Jan-19	EPI_ISL_198728	A/GD-44/2015/H7N9/2015-01-19	Guangdong Provincial Center for Disease Control and Prevention	Guangdong Provincial Center for Disease Control and Prevention
EPI656320	PB1	China	2015-Jan-16	EPI_ISL_198727	A/GD-21/2015/H7N9/2015-01-16	Guangdong Provincial Center for Disease Control and Prevention	Guangdong Provincial Center for Disease Control and Prevention
EPI656312	PB1	China	2015-Jan-15	EPI_ISL_198726	A/GD-20/2015/H7N9/2015-01-15	Guangdong Provincial Center for Disease Control and Prevention	Guangdong Provincial Center for Disease Control and Prevention
EPI656304	PB1	China	2015-Jan-11	EPI_ISL_198725	A/GD-17/2015/H7N9/2015-01-11	Guangdong Provincial Center for Disease Control and Prevention	Guangdong Provincial Center for Disease Control and Prevention
EPI656296	PB1	China	2015-Jan-11	EPI_ISL_198724	A/GD-18/2015/H7N9/2015-01-11	Guangdong Provincial Center for Disease Control and Prevention	Guangdong Provincial Center for Disease Control and Prevention
EPI656288	PB1	China	2015-Jan-06	EPI_ISL_198723	A/GD-10/2015/H7N9/2015-01-06	Guangdong Provincial Center for Disease Control and Prevention	Guangdong Provincial Center for Disease Control and Prevention
EPI656280	PB1	China	2015-Jan-06	EPI_ISL_198722	A/GD-2/2015/H7N9/2015-01-06	Guangdong Provincial Center for Disease Control and Prevention	Guangdong Provincial Center for Disease Control and Prevention
EPI656272	PB1	China	2015-Jan-03	EPI_ISL_198721	A/GD-1/2015/H7N9/2015-01-03	Guangdong Provincial Center for Disease Control and Prevention	Guangdong Provincial Center for Disease Control and Prevention
EPI656248	PB1	China	2014-May-28	EPI_ISL_198718	A/GD-154/2014/H7N9/2014-05-28	Guangdong Provincial Center for Disease Control and Prevention	Guangdong Provincial Center for Disease Control and Prevention
EPI656240	PB1	China	2014-May-08	EPI_ISL_198717	A/GD-153/2014/H7N9/2014-05-08	Guangdong Provincial Center for Disease Control and Prevention	Guangdong Provincial Center for Disease Control and Prevention
EPI656232	PB1	China	2014-May-06	EPI_ISL_198716	A/GD-151/2014/H7N9/2014-05-06	Guangdong Provincial Center for Disease Control and Prevention	Guangdong Provincial Center for Disease Control and Prevention
EPI656224	PB1	China	2014-Apr-06	EPI_ISL_198715	A/GD-139/2014/H7N9/2014-04-06	Guangdong Provincial Center for Disease Control and Prevention	Guangdong Provincial Center for Disease Control and Prevention
EPI656217	PB1	China	2014-Apr-05	EPI_ISL_198714	A/GD-138/2014/H7N9/2014-04-05	Guangdong Provincial Center for Disease Control and Prevention	Guangdong Provincial Center for Disease Control and Prevention
EPI656209	PB1	China	2014-Mar-29	EPI_ISL_198713	A/GD-136/2014/H7N9/2014-03-29	Guangdong Provincial Center for Disease Control and Prevention	Guangdong Provincial Center for Disease Control and Prevention
EPI656201	PB1	China	2014-Mar-10	EPI_ISL_198712	A/GD-126/2014/H7N9/2014-03-10	Guangdong Provincial Center for Disease Control and Prevention	Guangdong Provincial Center for Disease Control and Prevention
EPI656193	PB1	China	2014-Mar-09	EPI_ISL_198711	A/GD-125/2014/H7N9/2014-03-09	Guangdong Provincial Center for Disease Control and Prevention	Guangdong Provincial Center for Disease Control and Prevention
EPI656185	PB1	China	2014-Mar-06	EPI_ISL_198710	A/GD-124/2014/H7N9/2014-03-06	Guangdong Provincial Center for Disease Control and Prevention	Guangdong Provincial Center for Disease Control and Prevention
EPI656177	PB1	China	2014-Mar-01	EPI_ISL_198709	A/GD-123/2014/H7N9/2014-03-01	Guangdong Provincial Center for Disease Control and Prevention	Guangdong Provincial Center for Disease Control and Prevention
EPI656169	PB1	China	2014-Feb-22	EPI_ISL_198708	A/GD-117/2014/H7N9/2014-02-22	Guangdong Provincial Center for Disease Control and Prevention	Guangdong Provincial Center for Disease Control and Prevention
EPI656154	PB1	China	2014-Feb-19	EPI_ISL_198706	A/GD-121/2014/H7N9/2014-02-19	Guangdong Provincial Center for Disease Control and Prevention	Guangdong Provincial Center for Disease Control and Prevention
EPI656146	PB1	China	2014-Feb-19	EPI_ISL_198705	A/GD-120/2014/H7N9/2014-02-19	Guangdong Provincial Center for Disease Control and Prevention	Guangdong Provincial Center for Disease Control and Prevention
EPI656138	PB1	China	2014-Feb-19	EPI_ISL_198704	A/GD-119/2014/H7N9/2014-02-19	Guangdong Provincial Center for Disease Control and Prevention	Guangdong Provincial Center for Disease Control and Prevention
EPI656130	PB1	China	2014-Feb-18	EPI_ISL_198703	A/GD-114/2014/H7N9/2014-02-18	Guangdong Provincial Center for Disease Control and Prevention	Guangdong Provincial Center for Disease Control and Prevention
EPI656122	PB1	China	2014-Feb-18	EPI_ISL_198702	A/GD-112/2014/H7N9/2014-02-18	Guangdong Provincial Center for Disease Control and Prevention	Guangdong Provincial Center for Disease Control and Prevention
EPI656114	PB1	China	2014-Feb-13	EPI_ISL_198701	A/GD-110/2014/H7N9/2014-02-13	Guangdong Provincial Center for Disease Control and Prevention	Guangdong Provincial Center for Disease Control and Prevention
EPI656108	PB1	China	2014-Feb-13	EPI_ISL_198700	A/GD-109/2014/H7N9/2014-02-13	Guangdong Provincial Center for Disease Control and Prevention	Guangdong Provincial Center for Disease Control and Prevention
EPI656100	PB1	China	2014-Feb-11	EPI_ISL_198699	A/GD-105/2014/H7N9/2014-02-11	Guangdong Provincial Center for Disease Control and Prevention	Guangdong Provincial Center for Disease Control and Prevention
EPI656092	PB1	China	2014-Feb-11	EPI_ISL_198698	A/GD-104/2014/H7N9/2014-02-11	Guangdong Provincial Center for Disease Control and Prevention	Guangdong Provincial Center for Disease Control and Prevention
EPI656084	PB1	China	2014-Feb-10	EPI_ISL_198697	A/GD-103/2014/H7N9/2014-02-10	Guangdong Provincial Center for Disease Control and Prevention	Guangdong Provincial Center for Disease Control and Prevention
EPI656076	PB1	China	2014-Feb-07	EPI_ISL_198696	A/GD-101/2014/H7N9/2014-02-07	Guangdong Provincial Center for Disease Control and Prevention	Guangdong Provincial Center for Disease Control and Prevention
EPI656068	PB1	China	2014-Feb-06	EPI_ISL_198695	A/GD-98/2014/H7N9/2014-02-06	Guangdong Provincial Center for Disease Control and Prevention	Guangdong Provincial Center for Disease Control and Prevention
EPI656060	PB1	China	2014-Feb-02	EPI_ISL_198694	A/GD-82/2014/H7N9/2014-02-02	Guangdong Provincial Center for Disease Control and Prevention	Guangdong Provincial Center for Disease Control and Prevention
EPI656052	PB1	China	2014-Jan-31	EPI_ISL_198693	A/GD-74/2014/H7N9/2014-01-31	Guangdong Provincial Center for Disease Control and Prevention	Guangdong Provincial Center for Disease Control and Prevention
EPI656044	PB1	China	2014-Jan-31	EPI_ISL_198692	A/GD-75/2014/H7N9/2014-01-31	Guangdong Provincial Center for Disease Control and Prevention	Guangdong Provincial Center for Disease Control and Prevention
EPI656036	PB1	China	2014-Jan-30	EPI_ISL_198691	A/GD-71/2014/H7N9/2014-01-30	Guangdong Provincial Center for Disease Control and Prevention	Guangdong Provincial Center for Disease Control and Prevention
EPI656028	PB1	China	2014-Jan-30	EPI_ISL_198690	A/GD-81/2014/H7N9/2014-01-30	Guangdong Provincial Center for Disease Control and Prevention	Guangdong Provincial Center for Disease Control and Prevention
EPI656020	PB1	China	2014-Jan-30	EPI_ISL_198689	A/GD-69/2014/H7N9/2014-01-30	Guangdong Provincial Center for Disease Control and Prevention	Guangdong Provincial Center for Disease Control and Prevention
EPI656012	PB1	China	2014-Jan-29	EPI_ISL_198688	A/GD-66/2014/H7N9/2014-01-29	Guangdong Provincial Center for Disease Control and Prevention	Guangdong Provincial Center for Disease Control and Prevention
EPI656004	PB1	China	2014-Jan-29	EPI_ISL_198687	A/GD-65/2014/H7N9/2014-01-29	Guangdong Provincial Center for Disease Control and Prevention	Guangdong Provincial Center for Disease Control and Prevention
EPI655996	PB1	China	2014-Jan-27	EPI_ISL_198686	A/GD-62/2014/H7N9/2014-01-27	Guangdong Provincial Center for Disease Control and Prevention	Guangdong Provincial Center for Disease Control and Prevention
EPI655988	PB1	China	2014-Jan-19	EPI_ISL_198685	A/GD-48/2014/H7N9/2014-01-19	Guangdong Provincial Center for Disease Control and Prevention	Guangdong Provincial Center for Disease Control and Prevention
EPI655980	PB1	China	2014-Jan-16	EPI_ISL_198684	A/GD-46/2014/H7N9/2014-01-16	Guangdong Provincial Center for Disease Control and Prevention	Guangdong Provincial Center for Disease Control and Prevention
EPI655972	PB1	China	2014-Jan-15	EPI_ISL_198683	A/GD-43/2014/H7N9/2014-01-15	Guangdong Provincial Center for Disease Control and Prevention	Guangdong Provincial Center for Disease Control and Prevention
EPI655964	PB1	China	2014-Jan-12	EPI_ISL_198682	A/GD-35/2014/H7N9/2014-01-12	Guangdong Provincial Center for Disease Control and Prevention	Guangdong Provincial Center for Disease Control and Prevention
EPI655956	PB1	China	2014-Jan-12	EPI_ISL_198681	A/GD-36/2014/H7N9/2014-01-12	Guangdong Provincial Center for Disease Control and Prevention	Guangdong Provincial Center for Disease Control and Prevention
EPI655948	PB1	China	2014-Jan-12	EPI_ISL_198680	A/GD-34/2014/H7N9/2014-01-12	Guangdong Provincial Center for Disease Control and Prevention	Guangdong Provincial Center for Disease Control and Prevention
EPI655940	PB1	China	2014-Jan-12	EPI_ISL_198679	A/GD-33/2014/H7N9/2014-01-12	Guangdong Provincial Center for Disease Control and Prevention	Guangdong Provincial Center for Disease Control and Prevention
EPI655932	PB1	China	2014-Jan-11	EPI_ISL_198678	A/GD-31/2014/H7N9/2014-01-11	Guangdong Provincial Center for Disease Control and Prevention	Guangdong Provincial Center for Disease Control and Prevention
EPI655924	PB1	China	2014-Jan-11	EPI_ISL_198677	A/GD-29/2014/H7N9/2014-01-11	Guangdong Provincial Center for Disease Control and Prevention	Guangdong Provincial Center for Disease Control and Prevention
EPI655916	PB1	China	2014-Jan-10	EPI_ISL_198676	A/GD-26/2014/H7N9/2014-01-10	Guangdong Provincial Center for Disease Control and Prevention	Guangdong Provincial Center for Disease Control and Prevention
EPI655908	PB1	China	2014-Jan-10	EPI_ISL_198675	A/GD-24/2014/H7N9/2014-01-10	Guangdong Provincial Center for Disease Control and Prevention	Guangdong Provincial Center for Disease Control and Prevention
EPI655900	PB1	China	2014-Jan-07	EPI_ISL_198674	A/GD-19/2014/H7N9/2014-01-07	Guangdong Provincial Center for Disease Control and Prevention	Guangdong Provincial Center for Disease Control and Prevention
EPI655892	PB1	China	2014-Jan-07	EPI_ISL_198673	A/GD-18/2014/H7N9/2014-01-07	Guangdong Provincial Center for Disease Control and Prevention	Guangdong Provincial Center for Disease Control and Prevention
EPI655884	PB1	China	2014-Jan-03	EPI_ISL_198672	A/GD-13/2014/H7N9/2014-01-03	Guangdong Provincial Center for Disease Control and Prevention	Guangdong Provincial Center for Disease Control and Prevention
EPI655876	PB1	China	2014-Jan-03	EPI_ISL_198671	A/GD-12/2014/H7N9/2014-01-03	Guangdong Provincial Center for Disease Control and Prevention	Guangdong Provincial Center for Disease Control and Prevention
EPI655868	PB1	China	2014-Jan-03	EPI_ISL_198670	A/GD-10/2014/H7N9/2014-01-03	Guangdong Provincial Center for Disease Control and Prevention	Guangdong Provincial Center for Disease Control and Prevention
EPI621132	PB1	China	2015-Apr-23	EPI_ISL_190692	A/Quzhou/2/2015		Import from public-domain	Cao,W.-C.; Fang,C.-F.; Ma,M.-J.; Zhan,B.-D.; Lai,S.-M.; Hu,Y.; Yang,X.-X.; Li,J.; Cao,G.-P.; Zhou,J.-J.; Zhang,J.-M.; Wang,S.-Q.; Hu,X.-L.; Chen,E.-F.; Li,Y.-J.; Yao,H.-W.; Li,X.-L.; Jiang,J.-F.; Yi,H.-M.; Xu,W.-D.; Gray,G.C.; Fang,L.-Q.
EPI621125	PB1	China	2015-Apr-25	EPI_ISL_190691	A/Quzhou/1/2015		Import from public-domain	Cao,W.-C.; Fang,C.-F.; Ma,M.-J.; Zhan,B.-D.; Lai,S.-M.; Hu,Y.; Yang,X.-X.; Li,J.; Cao,G.-P.; Zhou,J.-J.; Zhang,J.-M.; Wang,S.-Q.; Hu,X.-L.; Chen,E.-F.; Li,Y.-J.; Yao,H.-W.; Li,X.-L.; Jiang,J.-F.; Yi,H.-M.; Xu,W.-D.; Gray,G.C.; Fang,L.-Q.
EPI613795	PB1	China	2013-Jan-01	EPI_ISL_188979	A/Anhui/DEWH72-09/2013		Import from public-domain	Wentworth,D.E.; Halpin,R.A.; Lin,X.; Bera,J.; Akopov,A.; Ransier,A.; Mohan,M.; Fedorova,N.; Tsitrin,T.; Puri,V.; Stockwell,T.; Amedeo,P.; Appalla,L.; Bishop,B.; Edworthy,P.; Gupta,N.; Hoover,J.; Katzel,D.; Schobel,S.; Shrivastava,S.; Thovarai,V.; Wang,S.; Bao,Y.; Sanders,R.; Zhdanov,S.; Kiryutin,B.; Lipman,D.J.; Tatusova,T.; Fouchier,R.A.M.
EPI613788	PB1	China	2013-Jan-01	EPI_ISL_188978	A/Anhui/DEWH72-08/2013		Import from public-domain	Wentworth,D.E.; Halpin,R.A.; Lin,X.; Bera,J.; Akopov,A.; Ransier,A.; Mohan,M.; Fedorova,N.; Tsitrin,T.; Puri,V.; Stockwell,T.; Amedeo,P.; Appalla,L.; Bishop,B.; Edworthy,P.; Gupta,N.; Hoover,J.; Katzel,D.; Schobel,S.; Shrivastava,S.; Thovarai,V.; Wang,S.; Bao,Y.; Sanders,R.; Zhdanov,S.; Kiryutin,B.; Lipman,D.J.; Tatusova,T.; Fouchier,R.A.M.
EPI613781	PB1	China	2013-Jan-01	EPI_ISL_188977	A/Anhui/DEWH72-07/2013		Import from public-domain	Wentworth,D.E.; Halpin,R.A.; Lin,X.; Bera,J.; Akopov,A.; Ransier,A.; Mohan,M.; Fedorova,N.; Tsitrin,T.; Puri,V.; Stockwell,T.; Amedeo,P.; Appalla,L.; Bishop,B.; Edworthy,P.; Gupta,N.; Hoover,J.; Katzel,D.; Schobel,S.; Shrivastava,S.; Thovarai,V.; Wang,S.; Bao,Y.; Sanders,R.; Zhdanov,S.; Kiryutin,B.; Lipman,D.J.; Tatusova,T.; Fouchier,R.A.M.
EPI613774	PB1	China	2013-Jan-01	EPI_ISL_188976	A/Anhui/DEWH72-06/2013		Import from public-domain	Wentworth,D.E.; Halpin,R.A.; Lin,X.; Bera,J.; Akopov,A.; Ransier,A.; Mohan,M.; Fedorova,N.; Tsitrin,T.; Puri,V.; Stockwell,T.; Amedeo,P.; Appalla,L.; Bishop,B.; Edworthy,P.; Gupta,N.; Hoover,J.; Katzel,D.; Schobel,S.; Shrivastava,S.; Thovarai,V.; Wang,S.; Bao,Y.; Sanders,R.; Zhdanov,S.; Kiryutin,B.; Lipman,D.J.; Tatusova,T.; Fouchier,R.A.M.
EPI613767	PB1	China	2013-Jan-01	EPI_ISL_188975	A/Anhui/DEWH72-05/2013		Import from public-domain	Wentworth,D.E.; Halpin,R.A.; Lin,X.; Bera,J.; Akopov,A.; Ransier,A.; Mohan,M.; Fedorova,N.; Tsitrin,T.; Puri,V.; Stockwell,T.; Amedeo,P.; Appalla,L.; Bishop,B.; Edworthy,P.; Gupta,N.; Hoover,J.; Katzel,D.; Schobel,S.; Shrivastava,S.; Thovarai,V.; Wang,S.; Bao,Y.; Sanders,R.; Zhdanov,S.; Kiryutin,B.; Lipman,D.J.; Tatusova,T.; Fouchier,R.A.M.
EPI613833	PB1	China	2013-Jan-01	EPI_ISL_188974	A/Anhui/DEWH72-04/2013		Import from public-domain	Wentworth,D.E.; Halpin,R.A.; Lin,X.; Bera,J.; Akopov,A.; Ransier,A.; Mohan,M.; Fedorova,N.; Tsitrin,T.; Puri,V.; Stockwell,T.; Amedeo,P.; Appalla,L.; Bishop,B.; Edworthy,P.; Gupta,N.; Hoover,J.; Katzel,D.; Schobel,S.; Shrivastava,S.; Thovarai,V.; Wang,S.; Bao,Y.; Sanders,R.; Zhdanov,S.; Kiryutin,B.; Lipman,D.J.; Tatusova,T.; Fouchier,R.A.M.
EPI613826	PB1	China	2013-Jan-01	EPI_ISL_188973	A/Anhui/DEWH72-03/2013		Import from public-domain	Wentworth,D.E.; Halpin,R.A.; Lin,X.; Bera,J.; Akopov,A.; Ransier,A.; Mohan,M.; Fedorova,N.; Tsitrin,T.; Puri,V.; Stockwell,T.; Amedeo,P.; Appalla,L.; Bishop,B.; Edworthy,P.; Gupta,N.; Hoover,J.; Katzel,D.; Schobel,S.; Shrivastava,S.; Thovarai,V.; Wang,S.; Bao,Y.; Sanders,R.; Zhdanov,S.; Kiryutin,B.; Lipman,D.J.; Tatusova,T.; Fouchier,R.A.M.
EPI613819	PB1	China	2013-Jan-01	EPI_ISL_188972	A/Anhui/DEWH72-02/2013		Import from public-domain	Wentworth,D.E.; Halpin,R.A.; Lin,X.; Bera,J.; Akopov,A.; Ransier,A.; Mohan,M.; Fedorova,N.; Tsitrin,T.; Puri,V.; Stockwell,T.; Amedeo,P.; Appalla,L.; Bishop,B.; Edworthy,P.; Gupta,N.; Hoover,J.; Katzel,D.; Schobel,S.; Shrivastava,S.; Thovarai,V.; Wang,S.; Bao,Y.; Sanders,R.; Zhdanov,S.; Kiryutin,B.; Lipman,D.J.; Tatusova,T.; Fouchier,R.A.M.
EPI613812	PB1	China	2013-Jan-01	EPI_ISL_188971	A/Anhui/DEWH72-01/2013		Import from public-domain	Wentworth,D.E.; Halpin,R.A.; Lin,X.; Bera,J.; Akopov,A.; Ransier,A.; Mohan,M.; Fedorova,N.; Tsitrin,T.; Puri,V.; Stockwell,T.; Amedeo,P.; Appalla,L.; Bishop,B.; Edworthy,P.; Gupta,N.; Hoover,J.; Katzel,D.; Schobel,S.; Shrivastava,S.; Thovarai,V.; Wang,S.; Bao,Y.; Sanders,R.; Zhdanov,S.; Kiryutin,B.; Lipman,D.J.; Tatusova,T.; Fouchier,R.A.M.
EPI578028	PB1	China	2014-Mar-18	EPI_ISL_176442	A/Shenzhen/SP118/2014		Import from public-domain	Lam,T.Y.; Zhou,B.; Wang,J.; Chai,Y.; Shen,Y.; Chen,X.; Ma,C.; Hong,W.; Chen,Y.; Zhang,Y.; Duan,L.; Chen,P.; Jiang,J.; Li,L.; Poon,L.M.; Webby,R.J.; Smith,D.K.; Leung,G.M.; Peiris,J.M.; Holmes,E.C.; Guan,Y.; Zhu,H.
EPI578021	PB1	China	2014-Mar-15	EPI_ISL_176441	A/Shenzhen/SP116/2014		Import from public-domain	Lam,T.Y.; Zhou,B.; Wang,J.; Chai,Y.; Shen,Y.; Chen,X.; Ma,C.; Hong,W.; Chen,Y.; Zhang,Y.; Duan,L.; Chen,P.; Jiang,J.; Li,L.; Poon,L.M.; Webby,R.J.; Smith,D.K.; Leung,G.M.; Peiris,J.M.; Holmes,E.C.; Guan,Y.; Zhu,H.
EPI578014	PB1	China	2014-Mar-12	EPI_ISL_176440	A/Shenzhen/SP113/2014		Import from public-domain	Lam,T.Y.; Zhou,B.; Wang,J.; Chai,Y.; Shen,Y.; Chen,X.; Ma,C.; Hong,W.; Chen,Y.; Zhang,Y.; Duan,L.; Chen,P.; Jiang,J.; Li,L.; Poon,L.M.; Webby,R.J.; Smith,D.K.; Leung,G.M.; Peiris,J.M.; Holmes,E.C.; Guan,Y.; Zhu,H.
EPI578007	PB1	China	2014-Feb-05	EPI_ISL_176439	A/Shenzhen/SP62/2014		Import from public-domain	Lam,T.Y.; Zhou,B.; Wang,J.; Chai,Y.; Shen,Y.; Chen,X.; Ma,C.; Hong,W.; Chen,Y.; Zhang,Y.; Duan,L.; Chen,P.; Jiang,J.; Li,L.; Poon,L.M.; Webby,R.J.; Smith,D.K.; Leung,G.M.; Peiris,J.M.; Holmes,E.C.; Guan,Y.; Zhu,H.
EPI578000	PB1	China	2014-Feb-15	EPI_ISL_176438	A/Shenzhen/SP75/2014		Import from public-domain	Lam,T.Y.; Zhou,B.; Wang,J.; Chai,Y.; Shen,Y.; Chen,X.; Ma,C.; Hong,W.; Chen,Y.; Zhang,Y.; Duan,L.; Chen,P.; Jiang,J.; Li,L.; Poon,L.M.; Webby,R.J.; Smith,D.K.; Leung,G.M.; Peiris,J.M.; Holmes,E.C.; Guan,Y.; Zhu,H.
EPI577993	PB1	China	2014-Jan-30	EPI_ISL_176437	A/Shenzhen/SP60/2014		Import from public-domain	Lam,T.Y.; Zhou,B.; Wang,J.; Chai,Y.; Shen,Y.; Chen,X.; Ma,C.; Hong,W.; Chen,Y.; Zhang,Y.; Duan,L.; Chen,P.; Jiang,J.; Li,L.; Poon,L.M.; Webby,R.J.; Smith,D.K.; Leung,G.M.; Peiris,J.M.; Holmes,E.C.; Guan,Y.; Zhu,H.
EPI578157	PB1	China	2014-Jan-25	EPI_ISL_176436	A/Shenzhen/SP58/2014		Import from public-domain	Lam,T.Y.; Zhou,B.; Wang,J.; Chai,Y.; Shen,Y.; Chen,X.; Ma,C.; Hong,W.; Chen,Y.; Zhang,Y.; Duan,L.; Chen,P.; Jiang,J.; Li,L.; Poon,L.M.; Webby,R.J.; Smith,D.K.; Leung,G.M.; Peiris,J.M.; Holmes,E.C.; Guan,Y.; Zhu,H.
EPI773753	PB1	China	2015-Mar-01	EPI_ISL_175287	A/Shantou/2011/2015		Shantou University Medical College	Farooqui,A;Liu,W;Kelvin,DJ;Zeng,T;Liu,Y;Zhang,L;Khan,A;Wu,X;Wu,R;Wu,S;Huang,L;Cai,Y;Kelvin,AA;Paquette,SG;Hu,K;Zheng,N;Chen,H;Xu,S;Lin,C;Sun,P;Yao,Z;Wang,J;Ma,H;Zhu,Z;Lin,P;Chen,W;Fang,X;Bermejo-Martin,JF;Leon,AJ
EPI773749	PB1	China	2015-Feb-07	EPI_ISL_175286	A/Shantou/2010/2015		Shantou University Medical College	Farooqui,A;Liu,W;Kelvin,DJ;Zeng,T;Liu,Y;Zhang,L;Khan,A;Wu,X;Wu,R;Wu,S;Huang,L;Cai,Y;Kelvin,AA;Paquette,SG;Hu,K;Zheng,N;Chen,H;Xu,S;Lin,C;Sun,P;Yao,Z;Wang,J;Ma,H;Zhu,Z;Lin,P;Chen,W;Fang,X;Bermejo-Martin,JF;Leon,AJ
EPI773731	PB1	China	2015-Feb-24	EPI_ISL_175284	A/Shantou/2006/2015		Shantou University Medical College	Farooqui,A;Liu,W;Kelvin,DJ;Zeng,T;Liu,Y;Zhang,L;Khan,A;Wu,X;Wu,R;Wu,S;Huang,L;Cai,Y;Kelvin,AA;Paquette,SG;Hu,K;Zheng,N;Chen,H;Xu,S;Lin,C;Sun,P;Yao,Z;Wang,J;Ma,H;Zhu,Z;Lin,P;Chen,W;Fang,X;Bermejo-Martin,JF;Leon,AJ
EPI773725	PB1	China	2015-Feb-21	EPI_ISL_175283	A/Shantou/2005/2015		Shantou University Medical College	Farooqui,A;Liu,W;Kelvin,DJ;Zeng,T;Liu,Y;Zhang,L;Khan,A;Wu,X;Wu,R;Wu,S;Huang,L;Cai,Y;Kelvin,AA;Paquette,SG;Hu,K;Zheng,N;Chen,H;Xu,S;Lin,C;Sun,P;Yao,Z;Wang,J;Ma,H;Zhu,Z;Lin,P;Chen,W;Fang,X;Bermejo-Martin,JF;Leon,AJ
EPI773718	PB1	China	2015-Feb-15	EPI_ISL_175282	A/Shantou/2004/2015		Shantou University Medical College	Farooqui,A;Liu,W;Kelvin,DJ;Zeng,T;Liu,Y;Zhang,L;Khan,A;Wu,X;Wu,R;Wu,S;Huang,L;Cai,Y;Kelvin,AA;Paquette,SG;Hu,K;Zheng,N;Chen,H;Xu,S;Lin,C;Sun,P;Yao,Z;Wang,J;Ma,H;Zhu,Z;Lin,P;Chen,W;Fang,X;Bermejo-Martin,JF;Leon,AJ
EPI773712	PB1	China	2015-Jan-24	EPI_ISL_175281	A/Shantou/2002/2015		Shantou University Medical College	Farooqui,A;Liu,W;Kelvin,DJ;Zeng,T;Liu,Y;Zhang,L;Khan,A;Wu,X;Wu,R;Wu,S;Huang,L;Cai,Y;Kelvin,AA;Paquette,SG;Hu,K;Zheng,N;Chen,H;Xu,S;Lin,C;Sun,P;Yao,Z;Wang,J;Ma,H;Zhu,Z;Lin,P;Chen,W;Fang,X;Bermejo-Martin,JF;Leon,AJ
EPI773706	PB1	China	2015-Jan-23	EPI_ISL_175280	A/Shantou/2001/2015		Shantou University Medical College	Farooqui,A;Liu,W;Kelvin,DJ;Zeng,T;Liu,Y;Zhang,L;Khan,A;Wu,X;Wu,R;Wu,S;Huang,L;Cai,Y;Kelvin,AA;Paquette,SG;Hu,K;Zheng,N;Chen,H;Xu,S;Lin,C;Sun,P;Yao,Z;Wang,J;Ma,H;Zhu,Z;Lin,P;Chen,W;Fang,X;Bermejo-Martin,JF;Leon,AJ
EPI773742	PB1	China	2015-Feb-16	EPI_ISL_174514	A/Shantou/2009/2015		Shantou University Medical College	Farooqui,A;Liu,W;Kelvin,DJ;Zeng,T;Liu,Y;Zhang,L;Khan,A;Wu,X;Wu,R;Wu,S;Huang,L;Cai,Y;Kelvin,AA;Paquette,SG;Hu,K;Zheng,N;Chen,H;Xu,S;Lin,C;Sun,P;Yao,Z;Wang,J;Ma,H;Zhu,Z;Lin,P;Chen,W;Fang,X;Bermejo-Martin,JF;Leon,AJ
EPI773737	PB1	China	2015-Mar-11	EPI_ISL_174513	A/Shantou/2008/2015	International Institute of Infection and Immunity, Shantou University Medical College	Shantou University Medical College	Farooqui,A;Liu,W;Kelvin,DJ;Zeng,T;Liu,Y;Zhang,L;Khan,A;Wu,X;Wu,R;Wu,S;Huang,L;Cai,Y;Kelvin,AA;Paquette,SG;Hu,K;Zheng,N;Chen,H;Xu,S;Lin,C;Sun,P;Yao,Z;Wang,J;Ma,H;Zhu,Z;Lin,P;Chen,W;Fang,X;Bermejo-Martin,JF;Leon,AJ
EPI566670	PB1	Hong Kong (SAR)	2015-Feb-22	EPI_ISL_173033	A/Hong Kong/8130773/2015	Hong Kong Department of Health	Hong Kong Department of Health	Mak,G.C.; Lo,J.Y.C.
EPI566136	PB1	China	2014-Dec-29	EPI_ISL_172829	A/Jiangsu/06307/2014		WHO Chinese National Influenza Center	Wang,Dayan;Gao,Rongbao;Yang,Lei;Chen,Wenbing;Zou,Shumei;Li,Xiyan;Guo,Junfeng;Dong,Jie;Xin,Li;Huang,Weijuan;Zhang,Ye;Bo,Hong;Wei,Hejiang;Zhou,Jianfang;Shu,Yuelong
EPI566129	PB1	China	2015-Jan-12	EPI_ISL_172828	A/Fujian/09273/2015		WHO Chinese National Influenza Center	Wang,Dayan;Gao,Rongbao;Yang,Lei;Chen,Wenbing;Zou,Shumei;Li,Xiyan;Guo,Junfeng;Dong,Jie;Xin,Li;Huang,Weijuan;Zhang,Ye;Bo,Hong;Wei,Hejiang;Zhou,Jianfang;Shu,Yuelong
EPI566122	PB1	China	2014-Nov-17	EPI_ISL_172827	A/Jiangsu/98342/2014		WHO Chinese National Influenza Center	Wang,Dayan;Gao,Rongbao;Yang,Lei;Chen,Wenbing;Zou,Shumei;Li,Xiyan;Guo,Junfeng;Dong,Jie;Xin,Li;Huang,Weijuan;Zhang,Ye;Bo,Hong;Wei,Hejiang;Zhou,Jianfang;Shu,Yuelong
EPI566114	PB1	China	2014-Nov-25	EPI_ISL_172826	A/Xinjiang/98692/2014		WHO Chinese National Influenza Center	Wang,Dayan;Gao,Rongbao;Yang,Lei;Chen,Wenbing;Zou,Shumei;Li,Xiyan;Guo,Junfeng;Dong,Jie;Xin,Li;Huang,Weijuan;Zhang,Ye;Bo,Hong;Wei,Hejiang;Zhou,Jianfang;Shu,Yuelong
EPI566106	PB1	China	2014-Nov-20	EPI_ISL_172825	A/XinjiangBintuan/99118/2014		WHO Chinese National Influenza Center	Wang,Dayan;Gao,Rongbao;Yang,Lei;Chen,Wenbing;Zou,Shumei;Li,Xiyan;Guo,Junfeng;Dong,Jie;Xin,Li;Huang,Weijuan;Zhang,Ye;Bo,Hong;Wei,Hejiang;Zhou,Jianfang;Shu,Yuelong
EPI566098	PB1	China	2014-Oct-25	EPI_ISL_172824	A/XinjiangBintuan/99117/2014		WHO Chinese National Influenza Center	Wang,Dayan;Gao,Rongbao;Yang,Lei;Chen,Wenbing;Zou,Shumei;Li,Xiyan;Guo,Junfeng;Dong,Jie;Xin,Li;Huang,Weijuan;Zhang,Ye;Bo,Hong;Wei,Hejiang;Zhou,Jianfang;Shu,Yuelong
EPI566090	PB1	China	2014-Nov-27	EPI_ISL_172823	A/Guangdong/02496/2014		WHO Chinese National Influenza Center	Wang,Dayan;Gao,Rongbao;Yang,Lei;Chen,Wenbing;Zou,Shumei;Li,Xiyan;Guo,Junfeng;Dong,Jie;Xin,Li;Huang,Weijuan;Zhang,Ye;Bo,Hong;Wei,Hejiang;Zhou,Jianfang;Shu,Yuelong
EPI566082	PB1	China	2015-Jan-09	EPI_ISL_172822	A/Guizhou/03240/2015		WHO Chinese National Influenza Center	Wang,Dayan;Gao,Rongbao;Yang,Lei;Chen,Wenbing;Zou,Shumei;Li,Xiyan;Guo,Junfeng;Dong,Jie;Xin,Li;Huang,Weijuan;Zhang,Ye;Bo,Hong;Wei,Hejiang;Zhou,Jianfang;Shu,Yuelong
EPI566074	PB1	China	2014-Dec-27	EPI_ISL_172821	A/Jiangsu/06306/2014		WHO Chinese National Influenza Center	Wang,Dayan;Gao,Rongbao;Yang,Lei;Chen,Wenbing;Zou,Shumei;Li,Xiyan;Guo,Junfeng;Dong,Jie;Xin,Li;Huang,Weijuan;Zhang,Ye;Bo,Hong;Wei,Hejiang;Zhou,Jianfang;Shu,Yuelong
EPI566066	PB1	China	2015-Jan-08	EPI_ISL_172820	A/Xinjiang/05845/2015		WHO Chinese National Influenza Center	Wang,Dayan;Gao,Rongbao;Yang,Lei;Chen,Wenbing;Zou,Shumei;Li,Xiyan;Guo,Junfeng;Dong,Jie;Xin,Li;Huang,Weijuan;Zhang,Ye;Bo,Hong;Wei,Hejiang;Zhou,Jianfang;Shu,Yuelong
EPI566058	PB1	China	2014-Nov-28	EPI_ISL_172819	A/Environment/Xinjiang/98679/2014		WHO Chinese National Influenza Center	Wang,Dayan;Gao,Rongbao;Yang,Lei;Chen,Wenbing;Zou,Shumei;Li,Xiyan;Guo,Junfeng;Dong,Jie;Xin,Li;Huang,Weijuan;Zhang,Ye;Bo,Hong;Wei,Hejiang;Zhou,Jianfang;Shu,Yuelong
EPI566050	PB1	China	2014-Dec-25	EPI_ISL_172818	A/Xinjiang/05916/2014		WHO Chinese National Influenza Center	Wang,Dayan;Gao,Rongbao;Yang,Lei;Chen,Wenbing;Zou,Shumei;Li,Xiyan;Guo,Junfeng;Dong,Jie;Xin,Li;Huang,Weijuan;Zhang,Ye;Bo,Hong;Wei,Hejiang;Zhou,Jianfang;Shu,Yuelong
EPI566042	PB1	China	2015-Jan-06	EPI_ISL_172817	A/Guangdong/15SF010/2015		WHO Chinese National Influenza Center	Wang,Dayan;Gao,Rongbao;Yang,Lei;Chen,Wenbing;Zou,Shumei;Li,Xiyan;Guo,Junfeng;Dong,Jie;Xin,Li;Huang,Weijuan;Zhang,Ye;Bo,Hong;Wei,Hejiang;Zhou,Jianfang;Shu,Yuelong
EPI566034	PB1	China	2015-Jan-12	EPI_ISL_172816	A/Guangdong/15SF018/2015		WHO Chinese National Influenza Center	Wang,Dayan;Gao,Rongbao;Yang,Lei;Chen,Wenbing;Zou,Shumei;Li,Xiyan;Guo,Junfeng;Dong,Jie;Xin,Li;Huang,Weijuan;Zhang,Ye;Bo,Hong;Wei,Hejiang;Zhou,Jianfang;Shu,Yuelong
EPI559415	PB1	Hong Kong (SAR)	2015-Jan-23	EPI_ISL_170981	A/Hong Kong/2550/2015	Hong Kong Department of Health	Hong Kong Department of Health	Mak,G.C.; Cheng,P.K.C.; Lo,J.Y.C.
EPI552397	PB1	China	2014-Nov-25	EPI_ISL_169131	A/Zhejiang/17/2014	Zhejiang Provincial Center for Disease Control and Prevention	Zhejiang Provincial Center for Disease Control and Prevention	Sun, Y; Zhang, YJ
EPI542310	PB1	China	2013-Apr-17	EPI_ISL_166490	A/Shanghai/MH01/2013		Import from public-domain	Zhao,B.H.; Zhang,X.; Pei,E.L.; Teng,Z.; Yu,X.L.; Shen,J.R.; Gao,Y.; Yuan,Z.G.; Wu,F.
EPI542091	PB1	China	2014-Feb-08	EPI_ISL_166435	A/Zhejiang/LS01/2014		Import from public-domain	Lei,Y.L.; Wang,X.G.; Mao,H.Y.
EPI541772	PB1	Taiwan	2013-Dec-27	EPI_ISL_166324	A/Taiwan/3/2013	Centers for Disease Control	Centers for Disease Control, R.O.C. (Taiwan)
EPI535201	PB1	China	2014-Feb-10	EPI_ISL_164007	A/Hangzhou/118/2014	Hangzhou Center for Disease Control and Prevention	Hangzhou Center for Disease Control and Prevention	Pu,XY;Li,J;Yu,XF;Kou,Y;Zhou,YY;Qian,X;Pan,JC
EPI535193	PB1	China	2014-Feb-09	EPI_ISL_164006	A/Hangzhou/112/2014	Hangzhou Center for Disease Control and Prevention	Hangzhou Center for Disease Control and Prevention	Pu,XY;Li,J;Yu,XF;Kou,Y;Zhou,YY;Qian,X;Pan,JC
EPI535185	PB1	China	2014-Feb-03	EPI_ISL_164005	A/Shaoxing/70/2014	Hangzhou Center for Disease Control and Prevention	Hangzhou Center for Disease Control and Prevention	Pu,XY;Li,J;Yu,XF;Kou,Y;Zhou,YY;Qian,X;Pan,JC
EPI535177	PB1	China	2014-Jan-29	EPI_ISL_164004	A/Hangzhou/49/2014	Hangzhou Center for Disease Control and Prevention	Hangzhou Center for Disease Control and Prevention	Pu,XY;Li,J;Yu,XF;Kou,Y;Zhou,YY;Qian,X;Pan,JC
EPI535169	PB1	China	2014-Jan-24	EPI_ISL_164003	A/Hangzhou/40/2014	Hangzhou Center for Disease Control and Prevention	Hangzhou Center for Disease Control and Prevention	Pu,XY;Li,J;Yu,XF;Kou,Y;Zhou,YY;Qian,X;Pan,JC
EPI535161	PB1	China	2014-Jan-23	EPI_ISL_164002	A/Hangzhou/39/2014	Hangzhou Center for Disease Control and Prevention	Hangzhou Center for Disease Control and Prevention	Pu,XY;Li,J;Yu,XF;Kou,Y;Zhou,YY;Qian,X;Pan,JC
EPI535153	PB1	China	2014-Jan-23	EPI_ISL_164001	A/Hangzhou/38/2014	Hangzhou Center for Disease Control and Prevention	Hangzhou Center for Disease Control and Prevention	Pu,XY;Li,J;Yu,XF;Kou,Y;Zhou,YY;Qian,X;Pan,JC
EPI535145	PB1	China	2014-Jan-23	EPI_ISL_164000	A/Hangzhou/35/2014	Hangzhou Center for Disease Control and Prevention	Hangzhou Center for Disease Control and Prevention	Pu,XY;Li,J;Yu,XF;Kou,Y;Zhou,YY;Qian,X;Pan,JC
EPI535137	PB1	China	2014-Jan-20	EPI_ISL_163999	A/Hangzhou/30/2014	Hangzhou Center for Disease Control and Prevention	Hangzhou Center for Disease Control and Prevention	Pu,XY;Li,J;Yu,XF;Kou,Y;Zhou,YY;Qian,X;Pan,JC
EPI535129	PB1	China	2014-Jan-18	EPI_ISL_163998	A/Jiaxing/20/2014	Hangzhou Center for Disease Control and Prevention	Hangzhou Center for Disease Control and Prevention	Pu,XY;Li,J;Yu,XF;Kou,Y;Zhou,YY;Qian,X;Pan,JC
EPI535121	PB1	China	2014-Jan-18	EPI_ISL_163997	A/Hangzhou/19/2014	Hangzhou Center for Disease Control and Prevention	Hangzhou Center for Disease Control and Prevention	Pu,XY;Li,J;Yu,XF;Kou,Y;Zhou,YY;Qian,X;Pan,JC
EPI531817	PB1	China	2014-Apr-19	EPI_ISL_162621	A/Shantou/1004/2014	Shantou University Medical College	Shantou University Medical College
EPI531814	PB1	China	2014-Apr-11	EPI_ISL_162620	A/Shantou/1003/2014	Shantou University Medical College	Shantou University Medical College
EPI531811	PB1	China	2014-Mar-23	EPI_ISL_162619	A/Shantou/1002/2014	Shantou University Medical College	Shantou University Medical College
EPI531808	PB1	China	2014-Mar-10	EPI_ISL_162618	A/Shantou/1001/2014	Shantou University Medical College	Shantou University Medical College
EPI531474	PB1	China	2014-Jan-03	EPI_ISL_162470	A/Shanghai/01/2014		Import from public-domain	Zhang,W.; Xu,L.; Tian,D.; Liu,Y.; Hu,Y.
EPI531123	PB1	China	2013-Jan-01	EPI_ISL_162351	A/Anhui/1-DEWH730/2013		Import from public-domain	Wentworth,D.E.; Halpin,R.A.; Lin,X.; Bera,J.; Akopov,A.; Ransier,A.; Mohan,M.; Fedorova,N.; Tsitrin,T.; Puri,V.; Stockwell,T.; Amedeo,P.; Appalla,L.; Bishop,B.; Edworthy,P.; Gupta,N.; Hoover,J.; Katzel,D.; Schobel,S.; Shrivastava,S.; Thovarai,V.; Wang,S.; Bao,Y.; Sanders,R.; Zhdanov,S.; Kiryutin,B.; Lipman,D.J.; Tatusova,T.; Richt,J.A.
EPI530823	PB1	Taiwan	2013-Jun-01	EPI_ISL_162218	A/Taiwan/1/2013		Import from public-domain	Yang,J.-R.; Liu,M.-T.; Wu,H.-S.
EPI531801	PB1	Taiwan	2014-Apr-24	EPI_ISL_160436	A/Taiwan/2/2014	Centers for Disease Control	Centers for Disease Control, R.O.C. (Taiwan)
EPI531795	PB1	Taiwan	2014-Apr-21	EPI_ISL_160435	A/Taiwan/1/2014	Centers for Disease Control	Centers for Disease Control, R.O.C. (Taiwan)
EPI520862	PB1	Hong Kong (SAR)	2014-Apr-08	EPI_ISL_160290	A/Hong Kong/5731/2014	Hong Kong Department of Health	Hong Kong Department of Health	Mak,G.C.; Cheng,P.K.C.; Lo,J.Y.C.
EPI509999	PB1	China	2014-Jan-08	EPI_ISL_157771	A/Guizhou/01502/2014		WHO Chinese National Influenza Center
EPI509886	PB1	Hong Kong (SAR)	2014-Mar-17	EPI_ISL_157703	A/Hong Kong/8113530/2014	Hong Kong Department of Health	Hong Kong Department of Health	Mak,G.C.; Cheng,P.K.C.; Lo,J.Y.C.
EPI509878	PB1	Hong Kong (SAR)	2014-Mar-01	EPI_ISL_157702	A/Hong Kong/4495/2014	Hong Kong Department of Health	Hong Kong Department of Health	Mak,G.C.; Cheng,P.K.C.; Lo,J.Y.C.
EPI507085	PB1	Hong Kong (SAR)	2014-Feb-12	EPI_ISL_156471	A/Hong Kong/3263/2014	Hong Kong Department of Health	Hong Kong Department of Health	Mak,G.C.; Cheng,P.K.C.; Lo,J.Y.C.
EPI506231	PB1	China	2013-Dec-17	EPI_ISL_156304	A/Guangdong/05/2013		Import from public-domain	Guan,D.; Xiao,H.; Zeng,X.; Wu,J.; Ni,H.; Zhang,X.; Zou,L.; Liang,L.; Ke,C.; Lin,J.; Zhang,Y.
EPI506223	PB1	China	2013-Dec-16	EPI_ISL_156302	A/Guangdong/04/2013		Import from public-domain	Guan,D.; Xiao,H.; Zeng,X.; Wu,J.; Ni,H.; Zhang,X.; Zou,L.; Liang,L.; Ke,C.; Lin,J.; Zhang,Y.
EPI504720	PB1	China	2013-May-01	EPI_ISL_155653	A/Shanghai/5190T/2013		Import from public-domain	Hu,Y.
EPI502371	PB1	Hong Kong (SAR)	2014-Jan-28	EPI_ISL_154553	A/Hong Kong/2212982/2014	Hong Kong Department of Health	Hong Kong Department of Health	Mak,G.C.; Cheng,P.K.C.; Lo,J.Y.C.
EPI499906	PB1	China	2013-Nov-04	EPI_ISL_153848	A/Guangdong/02/2013		Import from public-domain	Guan,D.; Xiao,H.; Zeng,X.; Wu,J.; Ni,H.; Zhang,X.; Zou,L.; Liang,L.; Ke,C.; Lin,J.; Zhang,Y.
EPI476699	PB1	China	2013-Aug-10	EPI_ISL_148417	A/Guangdong/1/2013		Import from public-domain	Guan,W.; Li,X.; Zhang,X.; Ni,H.; Ke,C.; Yang,Z.; Ding,G.; He,J.; Pan,S.; Huang,J.; Lin,J.; Wu,S.; Zheng,K.; Li,R.; Wang,Y.; Lin,Y.; Chen,L.; Zhou,R.; Li,Y.; Chen,R.; Zhang,Y.; Zhong,N.
EPI469538	PB1	China	2013-Apr-20	EPI_ISL_146437	A/Jiangsu/1/2013		Import from public-domain	Ren,X.; Yang,F.; Hu,Y.; Zhang,T.; Liu,L.; Dong,J.; Sun,L.; Zhu,Y.; Xiao,Y.; Li,L.; Yang,J.; Wang,J.; Jin,Q.
EPI469530	PB1	China	2013-Apr-20	EPI_ISL_146436	A/Jiangsu/2/2013		Import from public-domain	Ren,X.; Yang,F.; Hu,Y.; Zhang,T.; Liu,L.; Dong,J.; Sun,L.; Zhu,Y.; Xiao,Y.; Li,L.; Yang,J.; Wang,J.; Jin,Q.
EPI468965	PB1	China	2013-Apr-20	EPI_ISL_146161	A/Jiangsu/1/2013		Import from public-domain	Ren,X.; Yang,F.; Hu,Y.; Zhang,T.; Liu,L.; Dong,J.; Sun,L.; Zhu,Y.; Xiao,Y.; Li,L.; Yang,J.; Wang,J.; Jin,Q.
EPI467334	PB1	China	2013-Apr-02	EPI_ISL_145654	A/environment/Wuxi/1/2013		Import from public-domain	Qi,X.; Qian,Y.H.; Bao,C.J.; Guo,X.L.; Cui,L.B.; Tang,F.Y.; Ji,H.; Huang,Y.; Cai,P.Q.; Lu,B.; Xu,K.; Shi,C.; Zhu,F.C.; Zhou,M.H.; Wang,H.; Zhao,K.; Yu,H.; Shi,Z.; Ge,Y.
EPI467311	PB1	China	2013-Mar-31	EPI_ISL_145652	A/Wuxi/2/2013		Import from public-domain	Qi,X.; Qian,Y.H.; Bao,C.J.; Guo,X.L.; Cui,L.B.; Tang,F.Y.; Ji,H.; Huang,Y.; Cai,P.Q.; Lu,B.; Xu,K.; Shi,C.; Zhu,F.C.; Zhou,M.H.; Wang,H.; Zhao,K.; Yu,H.; Deng,F.; Qin,Y.; Shi,Z.
EPI467303	PB1	China	2013-Mar-31	EPI_ISL_145651	A/Wuxi/1/2013		Import from public-domain	Qi,X.; Qian,Y.H.; Bao,C.J.; Guo,X.L.; Cui,L.B.; Tang,F.Y.; Ji,H.; Huang,Y.; Cai,P.Q.; Lu,B.; Xu,K.; Shi,C.; Zhu,F.C.; Zhou,M.H.; Wang,H.; Zhao,K.; Yu,H.; Deng,F.; Qin,Y.; Shi,Z.
EPI460773	PB1	China	2013-Apr-25	EPI_ISL_143664	A/Nanjing/5/2013		Jiangsu Provincial Center for Disease Control & Prevention
EPI460765	PB1	China	2013-Apr-19	EPI_ISL_143663	A/Nanjing/3/2013	Jiangsu Provincial Center for Disease Control and Prevention	Jiangsu Provincial Center for Disease Control & Prevention
EPI460749	PB1	China	2013-Apr-09	EPI_ISL_143658	A/Nanjing/f0874/2013	Jiangsu Provincial Center for Disease Control and Prevention	Jiangsu Provincial Center for Disease Control & Prevention
EPI467775	PB1	China	2013-Apr-24	EPI_ISL_143556	A/Nanchang/1/2013		Import from public-domain	Zhou,X.; Xia,W.; Ni,X.; Fan,G.; Li,H.; Chen,H.
EPI453828	PB1	China	2013-Apr-24	EPI_ISL_142319	A/Fujian/1/2013		Import from public-domain	Weng,Y.; Zhang,Y.; Xie,J.; Huang,M.; Chen,W.; He,W.; Wu,B.; Wang,J.; Yang,S.; Zheng,K.; Yan,Y.
EPI453602	PB1	China	2013-Mar-28	EPI_ISL_142305	A/Nanjing/1/2013		Import from public-domain	Bao,C.; Cui,L.; Zhou,M.; Guo,X.; Hong,L.; Gao,G.F.; Wang,H.; Qi,X.; Ge,Y.; Zhao,K.; Li,W.; Tang,F.; Shi,Z.; Li,Y.
EPI453478	PB1	China	2013-Apr-01	EPI_ISL_142231	A/Zhejiang/HZ1/2013		Import from public-domain	Wu,H.; Wu,N.; Guo,C.; Li,L.
EPI452266	PB1	Taiwan	2013-Apr-22	EPI_ISL_142188	A/Taiwan/T02081/2013		Import from public-domain	Chang,S.-C.; Chang,S.-Y.
EPI452258	PB1	Taiwan	2013-Apr-22	EPI_ISL_142187	A/Taiwan/S02076/2013		Import from public-domain	Chang,S.-C.; Chang,S.-Y.
EPI451329	PB1	China	2013-May-01	EPI_ISL_142073	A/Shanghai/Patient5/2013	Shanghai public health clinical center	Institut Pasteur of Shanghai, CAS
EPI451281	PB1	China	2013-May-01	EPI_ISL_142045	A/Shanghai/Patient3/2013	Shanghai public health clinical center	Institut Pasteur of Shanghai, CAS
EPI451270	PB1	China	2013-May-01	EPI_ISL_142044	A/Shanghai/Patient6/2013	Shanghai public health clinical center	Institut Pasteur of Shanghai, CAS
EPI451260	PB1	China	2013-May-01	EPI_ISL_142042	A/Shanghai/Patient14/2013	Shanghai public health clinical center	Institut Pasteur of Shanghai, CAS
EPI451016	PB1		2013-May-01	EPI_ISL_141911	A/Shanghai/patient1/2013	Shanghai public health clinical center	Institut Pasteur of Shanghai, CAS	Yunwen, Hu; Zhenghong, Yuan
EPI450848	PB1	China	2013-Apr-19	EPI_ISL_141776	A/Hangzhou/327/2013	Hangzhou Center for Disease Control and Prevention	Hangzhou Center for Disease Control and Prevention	Li,J;Jin,T;Yu,XF;Pu,XY;Liu,J;Pan,JC
EPI450840	PB1	China	2013-Apr-17	EPI_ISL_141775	A/Hangzhou/254/2013	Hangzhou Center for Disease Control and Prevention	Hangzhou Center for Disease Control and Prevention	Li,J;Jin,T;Yu,XF;Pu,XY;Liu,J;Pan,JC
EPI453648	PB1	China	2013-Apr-26	EPI_ISL_141601	A/Nanjing/M2/2013	Jiangsu Provincial Center for Disease Control and Prevention	Jiangsu Provincial Center for Disease Control & Prevention
EPI448934	PB1	China	2013-Mar-05	EPI_ISL_141437	A/Shanghai/02/2013		Import from public-domain	Zhu,H.; Wang,D.; Kelvin,D.J.; Li,L.; Zheng,Z.; Yoon,S.W.; Wong,S.S.; Farooqui,A.; Wang,J.; Banner,D.; Chen,R.; Zheng,R.; Zhou,J.; Zhang,Y.; Hong,W.; Dong,W.; Cai,Q.; Roehrl,M.A.; Huang,S.H.; Calvin,A.A.; Yao,T.; Zhou,B.; Chen,X.; Leung,G.; Poon,L.; Webster,R.G.; Webby,R.J.; Peiris,J.; Guan,Y.; Shu,Y.; Leung,G.M.; Poon,L.L.; Peiris,J.S.
EPI445910	PB1	Taiwan	2013-Apr-24	EPI_ISL_140356	A/Taiwan/1/2013	National Influenza Center, Centers for Disease Control	Centers for Disease Control, R.O.C. (Taiwan)	Ji-Rong, Yang; Ming-Tsan, Liu; Ho-Sheng, Wu
EPI443641	PB1	China	2013-Apr-11	EPI_ISL_139904	A/Hangzhou/173/2013	Hangzhou Center for Disease Control and Prevention	Hangzhou Center for Disease Control and Prevention	Li,J;Yu,XF;Pu,XY;Xie,L;Sun,YX;Xiao,HX;Wang,FJ;Din,H;Wu,Y;Liu,D;Zhao,GQ;Liu,J;Pan,JC
EPI443633	PB1	China	2013-Apr-11	EPI_ISL_139903	A/Hangzhou/169/2013	Hangzhou Center for Disease Control and Prevention	Hangzhou Center for Disease Control and Prevention	Li,J;Yu,XF;Pu,XY;Xie,L;Sun,YX;Xiao,HX;Wang,FJ;Din,H;Wu,Y;Liu,D;Zhao,GQ;Liu,J;Pan,JC
EPI443040	PB1	China	2013-Apr-03	EPI_ISL_139653	A/Zhejiang/2/2013	Zhejiang Provincial Center for Disease Control and Prevention	Zhejiang Provincial Center for Disease Control and Prevention	Sun, Y; Zhang, YJ
EPI443032	PB1	China	2013-Mar-24	EPI_ISL_139652	A/Zhejiang/1/2013	Zhejiang Provincial Center for Disease Control and Prevention	Zhejiang Provincial Center for Disease Control and Prevention	Sun, Y; Zhang, YJ
EPI447942	PB1	China	2013-Mar-25	EPI_ISL_139651	A/Zhejiang/01/2013		WHO Chinese National Influenza Center	Wang,Dayan;Gao,Rongbao;Yang,Lei;Zhou,Shumei;Li,Xiyan;Zhou,Jianfang;Zhu,Wenfei;Guo,Junfeng;Li,Xiaodan;Dong,Jie;Huang,Weijuan;Zhang,Ye;Dong,Libo;Zhao,Xiang;Lu,Jian;Lan,Yu;Shu,Yuelong
EPI447950	PB1	China	2013-Mar-09	EPI_ISL_139650	A/Shanghai/4/2013		WHO Chinese National Influenza Center	Wang,Dayan;Gao,Rongbao;Yang,Lei;Zhou,Shumei;Li,Xiyan;Zhou,Jianfang;Zhu,Wenfei;Guo,Junfeng;Li,Xiaodan;Dong,Jie;Huang,Weijuan;Zhang,Ye;Dong,Libo;Zhao,Xiang;Lu,Jian;Lan,Yu;Shu,Yuelong
EPI447960	PB1	China	2013-Feb-27	EPI_ISL_139649	A/Shanghai/3/2013		WHO Chinese National Influenza Center	Wang,Dayan;Gao,Rongbao;Yang,Lei;Zhou,Shumei;Li,Xiyan;Zhou,Jianfang;Zhu,Wenfei;Guo,Junfeng;Li,Xiaodan;Dong,Jie;Huang,Weijuan;Zhang,Ye;Dong,Libo;Zhao,Xiang;Lu,Jian;Lan,Yu;Shu,Yuelong
EPI446456	PB1	China	2013-Apr-02	EPI_ISL_139499	A/Hangzhou/3/2013	Hangzhou Center for Disease Control and Prevention	Hangzhou Center for Disease Control and Prevention	Jing-Cao, Pan
EPI446450	PB1	China	2013-Mar-25	EPI_ISL_139498	A/Hangzhou/2/2013	Hangzhou Center for Disease Control and Prevention	Hangzhou Center for Disease Control and Prevention	Jing-Cao, Pan
EPI441800	PB1	China	2013-Apr-03	EPI_ISL_139364	A/Zhejiang/DTID-ZJU01/2013		Import from public-domain	Chen,H.-L.; Yuen,K.-Y.; Chen,Y.; Wu,N.P.; Yang,S.G.; Wo,J.E.; Yao,H.P.; Liang,W.F.; Cui,D.W.; Wu,H.B.; Li,L.J.
EPI919605	PB1	China	2017-Jan-03	EPI_ISL_249309	A/Guangdong/17SF003/2016		WHO Chinese National Influenza Center
EPI919597	PB1	China	2017-Jan-12	EPI_ISL_249308	A/Guangdong/17SF006/2017		WHO Chinese National Influenza Center
EPI918732	PB1	China	2017-Jan-14	EPI_ISL_249102	A/Qingyuan/GIRD1/2017	State Key Laboratory of Reipiratory Disease (Guangzhou Medical University)	Guangzhou Institute of Respiratory Diseases (GIRD)	Wenda Guan,PhD; Wenjun Song,PhD; Jianfeng He,MD; Changwen Ke,MD; Zifeng Yang,PhD; Haibo Zhou,MD; Qinhan Lin,MD; Yonghui Zhang,MD; Nanshan Zhong,MD
EPI888082	PB1	China	2016-Nov-16	EPI_ISL_242901	A/Fujian/54840/2016		WHO Chinese National Influenza Center	Wang,Dayan;Zhou,Shumei;Li,Xiyan;Li,Xiaodan;Zhang,Ye;Bo,Hong;Shu,Yuelong
EPI888074	PB1	China	2016-Dec-21	EPI_ISL_242900	A/Anhui/60926/2016		WHO Chinese National Influenza Center	Wang,Dayan;Zhou,Shumei;Li,Xiyan;Li,Xiaodan;Zhang,Ye;Bo,Hong;Shu,Yuelong
EPI888066	PB1	China	2016-Dec-19	EPI_ISL_242899	A/Jiangsu/60452/2016		WHO Chinese National Influenza Center	Wang,Dayan;Zhou,Shumei;Li,Xiyan;Li,Xiaodan;Zhang,Ye;Bo,Hong;Shu,Yuelong
EPI888058	PB1	China	2016-Dec-19	EPI_ISL_242898	A/Anhui/60935/2016		WHO Chinese National Influenza Center	Wang,Dayan;Zhou,Shumei;Li,Xiyan;Li,Xiaodan;Zhang,Ye;Bo,Hong;Shu,Yuelong
EPI888050	PB1	China	2016-Dec-19	EPI_ISL_242897	A/Anhui/60934/2016	Anhui Provincial Center for Disease Control and Prevention	WHO Chinese National Influenza Center	Wang,Dayan;Zhou,Shumei;Li,Xiyan;Li,Xiaodan;Zhang,Ye;Bo,Hong;Shu,Yuelong
EPI888042	PB1	China	2016-Dec-19	EPI_ISL_242896	A/Anhui/60933/2016	Anhui Provincial Center for Disease Control and Prevention	WHO Chinese National Influenza Center	Wang,Dayan;Zhou,Shumei;Li,Xiyan;Li,Xiaodan;Zhang,Ye;Bo,Hong;Shu,Yuelong
EPI888034	PB1	China	2016-Dec-13	EPI_ISL_242895	A/Anhui/60931/2016	Anhui Provincial Center for Disease Control and Prevention	WHO Chinese National Influenza Center	Wang,Dayan;Zhou,Shumei;Li,Xiyan;Li,Xiaodan;Zhang,Ye;Bo,Hong;Shu,Yuelong
EPI888026	PB1	China	2016-Dec-19	EPI_ISL_242894	A/Anhui/60932/2016		WHO Chinese National Influenza Center	Wang,Dayan;Zhou,Shumei;Li,Xiyan;Li,Xiaodan;Zhang,Ye;Bo,Hong;Shu,Yuelong
EPI888018	PB1	China	2016-Dec-15	EPI_ISL_242893	A/Anhui/60929/2016		WHO Chinese National Influenza Center	Wang,Dayan;Zhou,Shumei;Li,Xiyan;Li,Xiaodan;Zhang,Ye;Bo,Hong;Shu,Yuelong
EPI888010	PB1	China	2016-Dec-15	EPI_ISL_242892	A/Anhui/60928/2016		WHO Chinese National Influenza Center	Wang,Dayan;Zhou,Shumei;Li,Xiyan;Li,Xiaodan;Zhang,Ye;Bo,Hong;Shu,Yuelong
EPI888002	PB1	China	2016-Dec-21	EPI_ISL_242891	A/Anhui/60925/2016		WHO Chinese National Influenza Center	Wang,Dayan;Zhou,Shumei;Li,Xiyan;Li,Xiaodan;Zhang,Ye;Bo,Hong;Shu,Yuelong
EPI887994	PB1	China	2016-Dec-22	EPI_ISL_242890	A/Anhui/60924/2016	Anhui Provincial Center for Disease Control and Prevention	WHO Chinese National Influenza Center	Wang,Dayan;Zhou,Shumei;Li,Xiyan;Li,Xiaodan;Zhang,Ye;Bo,Hong;Shu,Yuelong
EPI887986	PB1	China	2016-Dec-18	EPI_ISL_242889	A/Anhui/60927/2016		WHO Chinese National Influenza Center	Wang,Dayan;Zhou,Shumei;Li,Xiyan;Li,Xiaodan;Zhang,Ye;Bo,Hong;Shu,Yuelong
EPI887978	PB1	China	2016-Dec-13	EPI_ISL_242888	A/Guangdong/60061/2016	Guangdong Provincial Center for Disease Control and Prevention	WHO Chinese National Influenza Center	Wang,Dayan;Zhou,Shumei;Li,Xiyan;Li,Xiaodan;Zhang,Ye;Bo,Hong;Shu,Yuelong
EPI887946	PB1	China	2016-Dec-16	EPI_ISL_242884	A/Anhui/60936/2016		WHO Chinese National Influenza Center	Wang,Dayan;Zhou,Shumei;Li,Xiyan;Li,Xiaodan;Zhang,Ye;Bo,Hong;Shu,Yuelong
EPI756013	PB1	China	2013-Apr-26	EPI_ISL_220945	A/Jiangsu/Wuxi04/2013	Beijing Institute of Microbiology and Epidemiology	Beijing Institute of Microbiology and Epidemiology	Maijuan,Ma;Guangyuan,Ma;Shanhui,Chen
EPI712924	PB1	Hong Kong (SAR)	2016-Feb-12	EPI_ISL_212471	A/Hong Kong/VB16021618/2016	Hong Kong Department of Health	Hong Kong Department of Health	Mak,G.C.; Lo,J.Y.C.
EPI637967	PB1	China	2013-Jan-01	EPI_ISL_194449	A/Anhui/1-YK_RG182/2013		Import from public-domain	Das,S.R.; Halpin,R.A.; Lin,X.; Simenauer,A.; Akopov,A.; Fedorova,N.; Puri,V.; Stockwell,T.; Amedeo,P.; Bishop,B.; Katzel,D.; Schobel,S.; Shrivastava,S.; Neumann,G.; Bao,Y.; Sanders,R.; Zhdanov,S.; Kiryutin,B.; Lipman,D.J.; Tatusova,T.; Kawaoka,Y.
EPI638107	PB1	China	2013-Jan-01	EPI_ISL_194448	A/Anhui/1-YK_RG202/2013		Import from public-domain	Das,S.R.; Halpin,R.A.; Lin,X.; Simenauer,A.; Akopov,A.; Fedorova,N.; Puri,V.; Stockwell,T.; Amedeo,P.; Bishop,B.; Katzel,D.; Schobel,S.; Shrivastava,S.; Neumann,G.; Bao,Y.; Sanders,R.; Zhdanov,S.; Kiryutin,B.; Lipman,D.J.; Tatusova,T.; Kawaoka,Y.
EPI638100	PB1	China	2013-Jan-01	EPI_ISL_194447	A/Anhui/1-YK_RG201/2013		Import from public-domain	Das,S.R.; Halpin,R.A.; Lin,X.; Simenauer,A.; Akopov,A.; Fedorova,N.; Puri,V.; Stockwell,T.; Amedeo,P.; Bishop,B.; Katzel,D.; Schobel,S.; Shrivastava,S.; Neumann,G.; Bao,Y.; Sanders,R.; Zhdanov,S.; Kiryutin,B.; Lipman,D.J.; Tatusova,T.; Kawaoka,Y.
EPI638093	PB1	China	2013-Jan-01	EPI_ISL_194446	A/Anhui/1-YK_RG200/2013		Import from public-domain	Das,S.R.; Halpin,R.A.; Lin,X.; Simenauer,A.; Akopov,A.; Fedorova,N.; Puri,V.; Stockwell,T.; Amedeo,P.; Bishop,B.; Katzel,D.; Schobel,S.; Shrivastava,S.; Neumann,G.; Bao,Y.; Sanders,R.; Zhdanov,S.; Kiryutin,B.; Lipman,D.J.; Tatusova,T.; Kawaoka,Y.
EPI638086	PB1	China	2013-Jan-01	EPI_ISL_194445	A/Anhui/1-YK_RG199/2013		Import from public-domain	Das,S.R.; Halpin,R.A.; Lin,X.; Simenauer,A.; Akopov,A.; Fedorova,N.; Puri,V.; Stockwell,T.; Amedeo,P.; Bishop,B.; Katzel,D.; Schobel,S.; Shrivastava,S.; Neumann,G.; Bao,Y.; Sanders,R.; Zhdanov,S.; Kiryutin,B.; Lipman,D.J.; Tatusova,T.; Kawaoka,Y.
EPI638079	PB1	China	2013-Jan-01	EPI_ISL_194444	A/Anhui/1-YK_RG198/2013		Import from public-domain	Das,S.R.; Halpin,R.A.; Lin,X.; Simenauer,A.; Akopov,A.; Fedorova,N.; Puri,V.; Stockwell,T.; Amedeo,P.; Bishop,B.; Katzel,D.; Schobel,S.; Shrivastava,S.; Neumann,G.; Bao,Y.; Sanders,R.; Zhdanov,S.; Kiryutin,B.; Lipman,D.J.; Tatusova,T.; Kawaoka,Y.
EPI638072	PB1	China	2013-Jan-01	EPI_ISL_194443	A/Anhui/1-YK_RG197/2013		Import from public-domain	Das,S.R.; Halpin,R.A.; Lin,X.; Simenauer,A.; Akopov,A.; Fedorova,N.; Puri,V.; Stockwell,T.; Amedeo,P.; Bishop,B.; Katzel,D.; Schobel,S.; Shrivastava,S.; Neumann,G.; Bao,Y.; Sanders,R.; Zhdanov,S.; Kiryutin,B.; Lipman,D.J.; Tatusova,T.; Kawaoka,Y.
EPI638065	PB1	China	2013-Jan-01	EPI_ISL_194442	A/Anhui/1-YK_RG196/2013		Import from public-domain	Das,S.R.; Halpin,R.A.; Lin,X.; Simenauer,A.; Akopov,A.; Fedorova,N.; Puri,V.; Stockwell,T.; Amedeo,P.; Bishop,B.; Katzel,D.; Schobel,S.; Shrivastava,S.; Neumann,G.; Bao,Y.; Sanders,R.; Zhdanov,S.; Kiryutin,B.; Lipman,D.J.; Tatusova,T.; Kawaoka,Y.
EPI638058	PB1	China	2013-Jan-01	EPI_ISL_194441	A/Anhui/1-YK_RG195/2013		Import from public-domain	Das,S.R.; Halpin,R.A.; Lin,X.; Simenauer,A.; Akopov,A.; Fedorova,N.; Puri,V.; Stockwell,T.; Amedeo,P.; Bishop,B.; Katzel,D.; Schobel,S.; Shrivastava,S.; Neumann,G.; Bao,Y.; Sanders,R.; Zhdanov,S.; Kiryutin,B.; Lipman,D.J.; Tatusova,T.; Kawaoka,Y.
EPI638051	PB1	China	2013-Jan-01	EPI_ISL_194440	A/Anhui/1-YK_RG194/2013		Import from public-domain	Das,S.R.; Halpin,R.A.; Lin,X.; Simenauer,A.; Akopov,A.; Fedorova,N.; Puri,V.; Stockwell,T.; Amedeo,P.; Bishop,B.; Katzel,D.; Schobel,S.; Shrivastava,S.; Neumann,G.; Bao,Y.; Sanders,R.; Zhdanov,S.; Kiryutin,B.; Lipman,D.J.; Tatusova,T.; Kawaoka,Y.
EPI638044	PB1	China	2013-Jan-01	EPI_ISL_194439	A/Anhui/1-YK_RG193/2013		Import from public-domain	Das,S.R.; Halpin,R.A.; Lin,X.; Simenauer,A.; Akopov,A.; Fedorova,N.; Puri,V.; Stockwell,T.; Amedeo,P.; Bishop,B.; Katzel,D.; Schobel,S.; Shrivastava,S.; Neumann,G.; Bao,Y.; Sanders,R.; Zhdanov,S.; Kiryutin,B.; Lipman,D.J.; Tatusova,T.; Kawaoka,Y.
EPI638037	PB1	China	2013-Jan-01	EPI_ISL_194438	A/Anhui/1-YK_RG192/2013		Import from public-domain	Das,S.R.; Halpin,R.A.; Lin,X.; Simenauer,A.; Akopov,A.; Fedorova,N.; Puri,V.; Stockwell,T.; Amedeo,P.; Bishop,B.; Katzel,D.; Schobel,S.; Shrivastava,S.; Neumann,G.; Bao,Y.; Sanders,R.; Zhdanov,S.; Kiryutin,B.; Lipman,D.J.; Tatusova,T.; Kawaoka,Y.
EPI638030	PB1	China	2013-Jan-01	EPI_ISL_194437	A/Anhui/1-YK_RG191/2013		Import from public-domain	Das,S.R.; Halpin,R.A.; Lin,X.; Simenauer,A.; Akopov,A.; Fedorova,N.; Puri,V.; Stockwell,T.; Amedeo,P.; Bishop,B.; Katzel,D.; Schobel,S.; Shrivastava,S.; Neumann,G.; Bao,Y.; Sanders,R.; Zhdanov,S.; Kiryutin,B.; Lipman,D.J.; Tatusova,T.; Kawaoka,Y.
EPI638023	PB1	China	2013-Jan-01	EPI_ISL_194436	A/Anhui/1-YK_RG190/2013		Import from public-domain	Das,S.R.; Halpin,R.A.; Lin,X.; Simenauer,A.; Akopov,A.; Fedorova,N.; Puri,V.; Stockwell,T.; Amedeo,P.; Bishop,B.; Katzel,D.; Schobel,S.; Shrivastava,S.; Neumann,G.; Bao,Y.; Sanders,R.; Zhdanov,S.; Kiryutin,B.; Lipman,D.J.; Tatusova,T.; Kawaoka,Y.
EPI638016	PB1	China	2013-Jan-01	EPI_ISL_194435	A/Anhui/1-YK_RG189/2013		Import from public-domain	Das,S.R.; Halpin,R.A.; Lin,X.; Simenauer,A.; Akopov,A.; Fedorova,N.; Puri,V.; Stockwell,T.; Amedeo,P.; Bishop,B.; Katzel,D.; Schobel,S.; Shrivastava,S.; Neumann,G.; Bao,Y.; Sanders,R.; Zhdanov,S.; Kiryutin,B.; Lipman,D.J.; Tatusova,T.; Kawaoka,Y.
EPI638009	PB1	China	2013-Jan-01	EPI_ISL_194434	A/Anhui/1-YK_RG188/2013		Import from public-domain	Das,S.R.; Halpin,R.A.; Lin,X.; Simenauer,A.; Akopov,A.; Fedorova,N.; Puri,V.; Stockwell,T.; Amedeo,P.; Bishop,B.; Katzel,D.; Schobel,S.; Shrivastava,S.; Neumann,G.; Bao,Y.; Sanders,R.; Zhdanov,S.; Kiryutin,B.; Lipman,D.J.; Tatusova,T.; Kawaoka,Y.
EPI638002	PB1	China	2013-Jan-01	EPI_ISL_194433	A/Anhui/1-YK_RG187/2013		Import from public-domain	Das,S.R.; Halpin,R.A.; Lin,X.; Simenauer,A.; Akopov,A.; Fedorova,N.; Puri,V.; Stockwell,T.; Amedeo,P.; Bishop,B.; Katzel,D.; Schobel,S.; Shrivastava,S.; Neumann,G.; Bao,Y.; Sanders,R.; Zhdanov,S.; Kiryutin,B.; Lipman,D.J.; Tatusova,T.; Kawaoka,Y.
EPI637995	PB1	China	2013-Jan-01	EPI_ISL_194432	A/Anhui/1-YK_RG186/2013		Import from public-domain	Das,S.R.; Halpin,R.A.; Lin,X.; Simenauer,A.; Akopov,A.; Fedorova,N.; Puri,V.; Stockwell,T.; Amedeo,P.; Bishop,B.; Katzel,D.; Schobel,S.; Shrivastava,S.; Neumann,G.; Bao,Y.; Sanders,R.; Zhdanov,S.; Kiryutin,B.; Lipman,D.J.; Tatusova,T.; Kawaoka,Y.
EPI637988	PB1	China	2013-Jan-01	EPI_ISL_194431	A/Anhui/1-YK_RG185/2013		Import from public-domain	Das,S.R.; Halpin,R.A.; Lin,X.; Simenauer,A.; Akopov,A.; Fedorova,N.; Puri,V.; Stockwell,T.; Amedeo,P.; Bishop,B.; Katzel,D.; Schobel,S.; Shrivastava,S.; Neumann,G.; Bao,Y.; Sanders,R.; Zhdanov,S.; Kiryutin,B.; Lipman,D.J.; Tatusova,T.; Kawaoka,Y.
EPI637981	PB1	China	2013-Jan-01	EPI_ISL_194430	A/Anhui/1-YK_RG184/2013		Import from public-domain	Das,S.R.; Halpin,R.A.; Lin,X.; Simenauer,A.; Akopov,A.; Fedorova,N.; Puri,V.; Stockwell,T.; Amedeo,P.; Bishop,B.; Katzel,D.; Schobel,S.; Shrivastava,S.; Neumann,G.; Bao,Y.; Sanders,R.; Zhdanov,S.; Kiryutin,B.; Lipman,D.J.; Tatusova,T.; Kawaoka,Y.
EPI637974	PB1	China	2013-Jan-01	EPI_ISL_194429	A/Anhui/1-YK_RG183/2013		Import from public-domain	Das,S.R.; Halpin,R.A.; Lin,X.; Simenauer,A.; Akopov,A.; Fedorova,N.; Puri,V.; Stockwell,T.; Amedeo,P.; Bishop,B.; Katzel,D.; Schobel,S.; Shrivastava,S.; Neumann,G.; Bao,Y.; Sanders,R.; Zhdanov,S.; Kiryutin,B.; Lipman,D.J.; Tatusova,T.; Kawaoka,Y.
EPI637960	PB1	China	2013-Jan-01	EPI_ISL_194428	A/Anhui/1-YK_RG181/2013		Import from public-domain	Das,S.R.; Halpin,R.A.; Lin,X.; Simenauer,A.; Akopov,A.; Fedorova,N.; Puri,V.; Stockwell,T.; Amedeo,P.; Bishop,B.; Katzel,D.; Schobel,S.; Shrivastava,S.; Neumann,G.; Bao,Y.; Sanders,R.; Zhdanov,S.; Kiryutin,B.; Lipman,D.J.; Tatusova,T.; Kawaoka,Y.
EPI637701	PB1	China	2013-Jan-01	EPI_ISL_194427	A/Anhui/1-YK_RG143/2013		Import from public-domain	Das,S.R.; Halpin,R.A.; Lin,X.; Simenauer,A.; Akopov,A.; Fedorova,N.; Puri,V.; Stockwell,T.; Amedeo,P.; Bishop,B.; Katzel,D.; Schobel,S.; Shrivastava,S.; Neumann,G.; Bao,Y.; Sanders,R.; Zhdanov,S.; Kiryutin,B.; Lipman,D.J.; Tatusova,T.; Kawaoka,Y.
EPI637953	PB1	China	2013-Jan-01	EPI_ISL_194426	A/Anhui/1-YK_RG180/2013		Import from public-domain	Das,S.R.; Halpin,R.A.; Lin,X.; Simenauer,A.; Akopov,A.; Fedorova,N.; Puri,V.; Stockwell,T.; Amedeo,P.; Bishop,B.; Katzel,D.; Schobel,S.; Shrivastava,S.; Neumann,G.; Bao,Y.; Sanders,R.; Zhdanov,S.; Kiryutin,B.; Lipman,D.J.; Tatusova,T.; Kawaoka,Y.
EPI637946	PB1	China	2013-Jan-01	EPI_ISL_194425	A/Anhui/1-YK_RG179/2013		Import from public-domain	Das,S.R.; Halpin,R.A.; Lin,X.; Simenauer,A.; Akopov,A.; Fedorova,N.; Puri,V.; Stockwell,T.; Amedeo,P.; Bishop,B.; Katzel,D.; Schobel,S.; Shrivastava,S.; Neumann,G.; Bao,Y.; Sanders,R.; Zhdanov,S.; Kiryutin,B.; Lipman,D.J.; Tatusova,T.; Kawaoka,Y.
EPI637939	PB1	China	2013-Jan-01	EPI_ISL_194424	A/Anhui/1-YK_RG178/2013		Import from public-domain	Das,S.R.; Halpin,R.A.; Lin,X.; Simenauer,A.; Akopov,A.; Fedorova,N.; Puri,V.; Stockwell,T.; Amedeo,P.; Bishop,B.; Katzel,D.; Schobel,S.; Shrivastava,S.; Neumann,G.; Bao,Y.; Sanders,R.; Zhdanov,S.; Kiryutin,B.; Lipman,D.J.; Tatusova,T.; Kawaoka,Y.
EPI637932	PB1	China	2013-Jan-01	EPI_ISL_194423	A/Anhui/1-YK_RG177/2013		Import from public-domain	Das,S.R.; Halpin,R.A.; Lin,X.; Simenauer,A.; Akopov,A.; Fedorova,N.; Puri,V.; Stockwell,T.; Amedeo,P.; Bishop,B.; Katzel,D.; Schobel,S.; Shrivastava,S.; Neumann,G.; Bao,Y.; Sanders,R.; Zhdanov,S.; Kiryutin,B.; Lipman,D.J.; Tatusova,T.; Kawaoka,Y.
EPI637925	PB1	China	2013-Jan-01	EPI_ISL_194422	A/Anhui/1-YK_RG176/2013		Import from public-domain	Das,S.R.; Halpin,R.A.; Lin,X.; Simenauer,A.; Akopov,A.; Fedorova,N.; Puri,V.; Stockwell,T.; Amedeo,P.; Bishop,B.; Katzel,D.; Schobel,S.; Shrivastava,S.; Neumann,G.; Bao,Y.; Sanders,R.; Zhdanov,S.; Kiryutin,B.; Lipman,D.J.; Tatusova,T.; Kawaoka,Y.
EPI637918	PB1	China	2013-Jan-01	EPI_ISL_194421	A/Anhui/1-YK_RG174/2013		Import from public-domain	Das,S.R.; Halpin,R.A.; Lin,X.; Simenauer,A.; Akopov,A.; Fedorova,N.; Puri,V.; Stockwell,T.; Amedeo,P.; Bishop,B.; Katzel,D.; Schobel,S.; Shrivastava,S.; Neumann,G.; Bao,Y.; Sanders,R.; Zhdanov,S.; Kiryutin,B.; Lipman,D.J.; Tatusova,T.; Kawaoka,Y.
EPI637911	PB1	China	2013-Jan-01	EPI_ISL_194420	A/Anhui/1-YK_RG173/2013		Import from public-domain	Das,S.R.; Halpin,R.A.; Lin,X.; Simenauer,A.; Akopov,A.; Fedorova,N.; Puri,V.; Stockwell,T.; Amedeo,P.; Bishop,B.; Katzel,D.; Schobel,S.; Shrivastava,S.; Neumann,G.; Bao,Y.; Sanders,R.; Zhdanov,S.; Kiryutin,B.; Lipman,D.J.; Tatusova,T.; Kawaoka,Y.
EPI637904	PB1	China	2013-Jan-01	EPI_ISL_194419	A/Anhui/1-YK_RG172/2013		Import from public-domain	Das,S.R.; Halpin,R.A.; Lin,X.; Simenauer,A.; Akopov,A.; Fedorova,N.; Puri,V.; Stockwell,T.; Amedeo,P.; Bishop,B.; Katzel,D.; Schobel,S.; Shrivastava,S.; Neumann,G.; Bao,Y.; Sanders,R.; Zhdanov,S.; Kiryutin,B.; Lipman,D.J.; Tatusova,T.; Kawaoka,Y.
EPI637897	PB1	China	2013-Jan-01	EPI_ISL_194418	A/Anhui/1-YK_RG171/2013		Import from public-domain	Das,S.R.; Halpin,R.A.; Lin,X.; Simenauer,A.; Akopov,A.; Fedorova,N.; Puri,V.; Stockwell,T.; Amedeo,P.; Bishop,B.; Katzel,D.; Schobel,S.; Shrivastava,S.; Neumann,G.; Bao,Y.; Sanders,R.; Zhdanov,S.; Kiryutin,B.; Lipman,D.J.; Tatusova,T.; Kawaoka,Y.
EPI637890	PB1	China	2013-Jan-01	EPI_ISL_194417	A/Anhui/1-YK_RG170/2013		Import from public-domain	Das,S.R.; Halpin,R.A.; Lin,X.; Simenauer,A.; Akopov,A.; Fedorova,N.; Puri,V.; Stockwell,T.; Amedeo,P.; Bishop,B.; Katzel,D.; Schobel,S.; Shrivastava,S.; Neumann,G.; Bao,Y.; Sanders,R.; Zhdanov,S.; Kiryutin,B.; Lipman,D.J.; Tatusova,T.; Kawaoka,Y.
EPI637883	PB1	China	2013-Jan-01	EPI_ISL_194416	A/Anhui/1-YK_RG169/2013		Import from public-domain	Das,S.R.; Halpin,R.A.; Lin,X.; Simenauer,A.; Akopov,A.; Fedorova,N.; Puri,V.; Stockwell,T.; Amedeo,P.; Bishop,B.; Katzel,D.; Schobel,S.; Shrivastava,S.; Neumann,G.; Bao,Y.; Sanders,R.; Zhdanov,S.; Kiryutin,B.; Lipman,D.J.; Tatusova,T.; Kawaoka,Y.
EPI637876	PB1	China	2013-Jan-01	EPI_ISL_194415	A/Anhui/1-YK_RG168/2013		Import from public-domain	Das,S.R.; Halpin,R.A.; Lin,X.; Simenauer,A.; Akopov,A.; Fedorova,N.; Puri,V.; Stockwell,T.; Amedeo,P.; Bishop,B.; Katzel,D.; Schobel,S.; Shrivastava,S.; Neumann,G.; Bao,Y.; Sanders,R.; Zhdanov,S.; Kiryutin,B.; Lipman,D.J.; Tatusova,T.; Kawaoka,Y.
EPI637869	PB1	China	2013-Jan-01	EPI_ISL_194414	A/Anhui/1-YK_RG167/2013		Import from public-domain	Das,S.R.; Halpin,R.A.; Lin,X.; Simenauer,A.; Akopov,A.; Fedorova,N.; Puri,V.; Stockwell,T.; Amedeo,P.; Bishop,B.; Katzel,D.; Schobel,S.; Shrivastava,S.; Neumann,G.; Bao,Y.; Sanders,R.; Zhdanov,S.; Kiryutin,B.; Lipman,D.J.; Tatusova,T.; Kawaoka,Y.
EPI637862	PB1	China	2013-Jan-01	EPI_ISL_194413	A/Anhui/1-YK_RG166/2013		Import from public-domain	Das,S.R.; Halpin,R.A.; Lin,X.; Simenauer,A.; Akopov,A.; Fedorova,N.; Puri,V.; Stockwell,T.; Amedeo,P.; Bishop,B.; Katzel,D.; Schobel,S.; Shrivastava,S.; Neumann,G.; Bao,Y.; Sanders,R.; Zhdanov,S.; Kiryutin,B.; Lipman,D.J.; Tatusova,T.; Kawaoka,Y.
EPI637855	PB1	China	2013-Jan-01	EPI_ISL_194412	A/Anhui/1-YK_RG165/2013		Import from public-domain	Das,S.R.; Halpin,R.A.; Lin,X.; Simenauer,A.; Akopov,A.; Fedorova,N.; Puri,V.; Stockwell,T.; Amedeo,P.; Bishop,B.; Katzel,D.; Schobel,S.; Shrivastava,S.; Neumann,G.; Bao,Y.; Sanders,R.; Zhdanov,S.; Kiryutin,B.; Lipman,D.J.; Tatusova,T.; Kawaoka,Y.
EPI637848	PB1	China	2013-Jan-01	EPI_ISL_194411	A/Anhui/1-YK_RG164/2013		Import from public-domain	Das,S.R.; Halpin,R.A.; Lin,X.; Simenauer,A.; Akopov,A.; Fedorova,N.; Puri,V.; Stockwell,T.; Amedeo,P.; Bishop,B.; Katzel,D.; Schobel,S.; Shrivastava,S.; Neumann,G.; Bao,Y.; Sanders,R.; Zhdanov,S.; Kiryutin,B.; Lipman,D.J.; Tatusova,T.; Kawaoka,Y.
EPI637841	PB1	China	2013-Jan-01	EPI_ISL_194410	A/Anhui/1-YK_RG163/2013		Import from public-domain	Das,S.R.; Halpin,R.A.; Lin,X.; Simenauer,A.; Akopov,A.; Fedorova,N.; Puri,V.; Stockwell,T.; Amedeo,P.; Bishop,B.; Katzel,D.; Schobel,S.; Shrivastava,S.; Neumann,G.; Bao,Y.; Sanders,R.; Zhdanov,S.; Kiryutin,B.; Lipman,D.J.; Tatusova,T.; Kawaoka,Y.
EPI637834	PB1	China	2013-Jan-01	EPI_ISL_194409	A/Anhui/1-YK_RG162/2013		Import from public-domain	Das,S.R.; Halpin,R.A.; Lin,X.; Simenauer,A.; Akopov,A.; Fedorova,N.; Puri,V.; Stockwell,T.; Amedeo,P.; Bishop,B.; Katzel,D.; Schobel,S.; Shrivastava,S.; Neumann,G.; Bao,Y.; Sanders,R.; Zhdanov,S.; Kiryutin,B.; Lipman,D.J.; Tatusova,T.; Kawaoka,Y.
EPI637827	PB1	China	2013-Jan-01	EPI_ISL_194408	A/Anhui/1-YK_RG161/2013		Import from public-domain	Das,S.R.; Halpin,R.A.; Lin,X.; Simenauer,A.; Akopov,A.; Fedorova,N.; Puri,V.; Stockwell,T.; Amedeo,P.; Bishop,B.; Katzel,D.; Schobel,S.; Shrivastava,S.; Neumann,G.; Bao,Y.; Sanders,R.; Zhdanov,S.; Kiryutin,B.; Lipman,D.J.; Tatusova,T.; Kawaoka,Y.
EPI637820	PB1	China	2013-Jan-01	EPI_ISL_194407	A/Anhui/1-YK_RG160/2013		Import from public-domain	Das,S.R.; Halpin,R.A.; Lin,X.; Simenauer,A.; Akopov,A.; Fedorova,N.; Puri,V.; Stockwell,T.; Amedeo,P.; Bishop,B.; Katzel,D.; Schobel,S.; Shrivastava,S.; Neumann,G.; Bao,Y.; Sanders,R.; Zhdanov,S.; Kiryutin,B.; Lipman,D.J.; Tatusova,T.; Kawaoka,Y.
EPI637813	PB1	China	2013-Jan-01	EPI_ISL_194406	A/Anhui/1-YK_RG159/2013		Import from public-domain	Das,S.R.; Halpin,R.A.; Lin,X.; Simenauer,A.; Akopov,A.; Fedorova,N.; Puri,V.; Stockwell,T.; Amedeo,P.; Bishop,B.; Katzel,D.; Schobel,S.; Shrivastava,S.; Neumann,G.; Bao,Y.; Sanders,R.; Zhdanov,S.; Kiryutin,B.; Lipman,D.J.; Tatusova,T.; Kawaoka,Y.
EPI637806	PB1	China	2013-Jan-01	EPI_ISL_194405	A/Anhui/1-YK_RG158/2013		Import from public-domain	Das,S.R.; Halpin,R.A.; Lin,X.; Simenauer,A.; Akopov,A.; Fedorova,N.; Puri,V.; Stockwell,T.; Amedeo,P.; Bishop,B.; Katzel,D.; Schobel,S.; Shrivastava,S.; Neumann,G.; Bao,Y.; Sanders,R.; Zhdanov,S.; Kiryutin,B.; Lipman,D.J.; Tatusova,T.; Kawaoka,Y.
EPI637799	PB1	China	2013-Jan-01	EPI_ISL_194404	A/Anhui/1-YK_RG157/2013		Import from public-domain	Das,S.R.; Halpin,R.A.; Lin,X.; Simenauer,A.; Akopov,A.; Fedorova,N.; Puri,V.; Stockwell,T.; Amedeo,P.; Bishop,B.; Katzel,D.; Schobel,S.; Shrivastava,S.; Neumann,G.; Bao,Y.; Sanders,R.; Zhdanov,S.; Kiryutin,B.; Lipman,D.J.; Tatusova,T.; Kawaoka,Y.
EPI637792	PB1	China	2013-Jan-01	EPI_ISL_194403	A/Anhui/1-YK_RG156/2013		Import from public-domain	Das,S.R.; Halpin,R.A.; Lin,X.; Simenauer,A.; Akopov,A.; Fedorova,N.; Puri,V.; Stockwell,T.; Amedeo,P.; Bishop,B.; Katzel,D.; Schobel,S.; Shrivastava,S.; Neumann,G.; Bao,Y.; Sanders,R.; Zhdanov,S.; Kiryutin,B.; Lipman,D.J.; Tatusova,T.; Kawaoka,Y.
EPI637785	PB1	China	2013-Jan-01	EPI_ISL_194402	A/Anhui/1-YK_RG155/2013		Import from public-domain	Das,S.R.; Halpin,R.A.; Lin,X.; Simenauer,A.; Akopov,A.; Fedorova,N.; Puri,V.; Stockwell,T.; Amedeo,P.; Bishop,B.; Katzel,D.; Schobel,S.; Shrivastava,S.; Neumann,G.; Bao,Y.; Sanders,R.; Zhdanov,S.; Kiryutin,B.; Lipman,D.J.; Tatusova,T.; Kawaoka,Y.
EPI637778	PB1	China	2013-Jan-01	EPI_ISL_194401	A/Anhui/1-YK_RG154/2013		Import from public-domain	Das,S.R.; Halpin,R.A.; Lin,X.; Simenauer,A.; Akopov,A.; Fedorova,N.; Puri,V.; Stockwell,T.; Amedeo,P.; Bishop,B.; Katzel,D.; Schobel,S.; Shrivastava,S.; Neumann,G.; Bao,Y.; Sanders,R.; Zhdanov,S.; Kiryutin,B.; Lipman,D.J.; Tatusova,T.; Kawaoka,Y.
EPI637771	PB1	China	2013-Jan-01	EPI_ISL_194400	A/Anhui/1-YK_RG153/2013		Import from public-domain	Das,S.R.; Halpin,R.A.; Lin,X.; Simenauer,A.; Akopov,A.; Fedorova,N.; Puri,V.; Stockwell,T.; Amedeo,P.; Bishop,B.; Katzel,D.; Schobel,S.; Shrivastava,S.; Neumann,G.; Bao,Y.; Sanders,R.; Zhdanov,S.; Kiryutin,B.; Lipman,D.J.; Tatusova,T.; Kawaoka,Y.
EPI637764	PB1	China	2013-Jan-01	EPI_ISL_194399	A/Anhui/1-YK_RG152/2013		Import from public-domain	Das,S.R.; Halpin,R.A.; Lin,X.; Simenauer,A.; Akopov,A.; Fedorova,N.; Puri,V.; Stockwell,T.; Amedeo,P.; Bishop,B.; Katzel,D.; Schobel,S.; Shrivastava,S.; Neumann,G.; Bao,Y.; Sanders,R.; Zhdanov,S.; Kiryutin,B.; Lipman,D.J.; Tatusova,T.; Kawaoka,Y.
EPI637757	PB1	China	2013-Jan-01	EPI_ISL_194398	A/Anhui/1-YK_RG151/2013		Import from public-domain	Das,S.R.; Halpin,R.A.; Lin,X.; Simenauer,A.; Akopov,A.; Fedorova,N.; Puri,V.; Stockwell,T.; Amedeo,P.; Bishop,B.; Katzel,D.; Schobel,S.; Shrivastava,S.; Neumann,G.; Bao,Y.; Sanders,R.; Zhdanov,S.; Kiryutin,B.; Lipman,D.J.; Tatusova,T.; Kawaoka,Y.
EPI637750	PB1	China	2013-Jan-01	EPI_ISL_194397	A/Anhui/1-YK_RG150/2013		Import from public-domain	Das,S.R.; Halpin,R.A.; Lin,X.; Simenauer,A.; Akopov,A.; Fedorova,N.; Puri,V.; Stockwell,T.; Amedeo,P.; Bishop,B.; Katzel,D.; Schobel,S.; Shrivastava,S.; Neumann,G.; Bao,Y.; Sanders,R.; Zhdanov,S.; Kiryutin,B.; Lipman,D.J.; Tatusova,T.; Kawaoka,Y.
EPI637743	PB1	China	2013-Jan-01	EPI_ISL_194396	A/Anhui/1-YK_RG149/2013		Import from public-domain	Das,S.R.; Halpin,R.A.; Lin,X.; Simenauer,A.; Akopov,A.; Fedorova,N.; Puri,V.; Stockwell,T.; Amedeo,P.; Bishop,B.; Katzel,D.; Schobel,S.; Shrivastava,S.; Neumann,G.; Bao,Y.; Sanders,R.; Zhdanov,S.; Kiryutin,B.; Lipman,D.J.; Tatusova,T.; Kawaoka,Y.
EPI637736	PB1	China	2013-Jan-01	EPI_ISL_194395	A/Anhui/1-YK_RG148/2013		Import from public-domain	Das,S.R.; Halpin,R.A.; Lin,X.; Simenauer,A.; Akopov,A.; Fedorova,N.; Puri,V.; Stockwell,T.; Amedeo,P.; Bishop,B.; Katzel,D.; Schobel,S.; Shrivastava,S.; Neumann,G.; Bao,Y.; Sanders,R.; Zhdanov,S.; Kiryutin,B.; Lipman,D.J.; Tatusova,T.; Kawaoka,Y.
EPI637729	PB1	China	2013-Jan-01	EPI_ISL_194394	A/Anhui/1-YK_RG147/2013		Import from public-domain	Das,S.R.; Halpin,R.A.; Lin,X.; Simenauer,A.; Akopov,A.; Fedorova,N.; Puri,V.; Stockwell,T.; Amedeo,P.; Bishop,B.; Katzel,D.; Schobel,S.; Shrivastava,S.; Neumann,G.; Bao,Y.; Sanders,R.; Zhdanov,S.; Kiryutin,B.; Lipman,D.J.; Tatusova,T.; Kawaoka,Y.
EPI637722	PB1	China	2013-Jan-01	EPI_ISL_194393	A/Anhui/1-YK_RG146/2013		Import from public-domain	Das,S.R.; Halpin,R.A.; Lin,X.; Simenauer,A.; Akopov,A.; Fedorova,N.; Puri,V.; Stockwell,T.; Amedeo,P.; Bishop,B.; Katzel,D.; Schobel,S.; Shrivastava,S.; Neumann,G.; Bao,Y.; Sanders,R.; Zhdanov,S.; Kiryutin,B.; Lipman,D.J.; Tatusova,T.; Kawaoka,Y.
EPI637715	PB1	China	2013-Jan-01	EPI_ISL_194392	A/Anhui/1-YK_RG145/2013		Import from public-domain	Das,S.R.; Halpin,R.A.; Lin,X.; Simenauer,A.; Akopov,A.; Fedorova,N.; Puri,V.; Stockwell,T.; Amedeo,P.; Bishop,B.; Katzel,D.; Schobel,S.; Shrivastava,S.; Neumann,G.; Bao,Y.; Sanders,R.; Zhdanov,S.; Kiryutin,B.; Lipman,D.J.; Tatusova,T.; Kawaoka,Y.
EPI637708	PB1	China	2013-Jan-01	EPI_ISL_194391	A/Anhui/1-YK_RG144/2013		Import from public-domain	Das,S.R.; Halpin,R.A.; Lin,X.; Simenauer,A.; Akopov,A.; Fedorova,N.; Puri,V.; Stockwell,T.; Amedeo,P.; Bishop,B.; Katzel,D.; Schobel,S.; Shrivastava,S.; Neumann,G.; Bao,Y.; Sanders,R.; Zhdanov,S.; Kiryutin,B.; Lipman,D.J.; Tatusova,T.; Kawaoka,Y.
EPI637652	PB1	China	2013-Jan-01	EPI_ISL_194390	A/Anhui/1-YK_RG136/2013		Import from public-domain	Das,S.R.; Halpin,R.A.; Lin,X.; Simenauer,A.; Akopov,A.; Fedorova,N.; Puri,V.; Stockwell,T.; Amedeo,P.; Bishop,B.; Katzel,D.; Schobel,S.; Shrivastava,S.; Neumann,G.; Bao,Y.; Sanders,R.; Zhdanov,S.; Kiryutin,B.; Lipman,D.J.; Tatusova,T.; Kawaoka,Y.
EPI637694	PB1	China	2013-Jan-01	EPI_ISL_194389	A/Anhui/1-YK_RG142/2013		Import from public-domain	Das,S.R.; Halpin,R.A.; Lin,X.; Simenauer,A.; Akopov,A.; Fedorova,N.; Puri,V.; Stockwell,T.; Amedeo,P.; Bishop,B.; Katzel,D.; Schobel,S.; Shrivastava,S.; Neumann,G.; Bao,Y.; Sanders,R.; Zhdanov,S.; Kiryutin,B.; Lipman,D.J.; Tatusova,T.; Kawaoka,Y.
EPI637687	PB1	China	2013-Jan-01	EPI_ISL_194388	A/Anhui/1-YK_RG141/2013		Import from public-domain	Das,S.R.; Halpin,R.A.; Lin,X.; Simenauer,A.; Akopov,A.; Fedorova,N.; Puri,V.; Stockwell,T.; Amedeo,P.; Bishop,B.; Katzel,D.; Schobel,S.; Shrivastava,S.; Neumann,G.; Bao,Y.; Sanders,R.; Zhdanov,S.; Kiryutin,B.; Lipman,D.J.; Tatusova,T.; Kawaoka,Y.
EPI637680	PB1	China	2013-Jan-01	EPI_ISL_194387	A/Anhui/1-YK_RG140/2013		Import from public-domain	Das,S.R.; Halpin,R.A.; Lin,X.; Simenauer,A.; Akopov,A.; Fedorova,N.; Puri,V.; Stockwell,T.; Amedeo,P.; Bishop,B.; Katzel,D.; Schobel,S.; Shrivastava,S.; Neumann,G.; Bao,Y.; Sanders,R.; Zhdanov,S.; Kiryutin,B.; Lipman,D.J.; Tatusova,T.; Kawaoka,Y.
EPI637673	PB1	China	2013-Jan-01	EPI_ISL_194386	A/Anhui/1-YK_RG139/2013		Import from public-domain	Das,S.R.; Halpin,R.A.; Lin,X.; Simenauer,A.; Akopov,A.; Fedorova,N.; Puri,V.; Stockwell,T.; Amedeo,P.; Bishop,B.; Katzel,D.; Schobel,S.; Shrivastava,S.; Neumann,G.; Bao,Y.; Sanders,R.; Zhdanov,S.; Kiryutin,B.; Lipman,D.J.; Tatusova,T.; Kawaoka,Y.
EPI637666	PB1	China	2013-Jan-01	EPI_ISL_194385	A/Anhui/1-YK_RG138/2013		Import from public-domain	Das,S.R.; Halpin,R.A.; Lin,X.; Simenauer,A.; Akopov,A.; Fedorova,N.; Puri,V.; Stockwell,T.; Amedeo,P.; Bishop,B.; Katzel,D.; Schobel,S.; Shrivastava,S.; Neumann,G.; Bao,Y.; Sanders,R.; Zhdanov,S.; Kiryutin,B.; Lipman,D.J.; Tatusova,T.; Kawaoka,Y.
EPI637659	PB1	China	2013-Jan-01	EPI_ISL_194384	A/Anhui/1-YK_RG137/2013		Import from public-domain	Das,S.R.; Halpin,R.A.; Lin,X.; Simenauer,A.; Akopov,A.; Fedorova,N.; Puri,V.; Stockwell,T.; Amedeo,P.; Bishop,B.; Katzel,D.; Schobel,S.; Shrivastava,S.; Neumann,G.; Bao,Y.; Sanders,R.; Zhdanov,S.; Kiryutin,B.; Lipman,D.J.; Tatusova,T.; Kawaoka,Y.
EPI637638	PB1	China	2013-Jan-01	EPI_ISL_194383	A/Anhui/1-YK_RG134/2013		Import from public-domain	Das,S.R.; Halpin,R.A.; Lin,X.; Simenauer,A.; Akopov,A.; Fedorova,N.; Puri,V.; Stockwell,T.; Amedeo,P.; Bishop,B.; Katzel,D.; Schobel,S.; Shrivastava,S.; Neumann,G.; Bao,Y.; Sanders,R.; Zhdanov,S.; Kiryutin,B.; Lipman,D.J.; Tatusova,T.; Kawaoka,Y.
EPI637645	PB1	China	2013-Jan-01	EPI_ISL_194382	A/Anhui/1-YK_RG135/2013		Import from public-domain	Das,S.R.; Halpin,R.A.; Lin,X.; Simenauer,A.; Akopov,A.; Fedorova,N.; Puri,V.; Stockwell,T.; Amedeo,P.; Bishop,B.; Katzel,D.; Schobel,S.; Shrivastava,S.; Neumann,G.; Bao,Y.; Sanders,R.; Zhdanov,S.; Kiryutin,B.; Lipman,D.J.; Tatusova,T.; Kawaoka,Y.
EPI637582	PB1	China	2013-Jan-01	EPI_ISL_194381	A/Anhui/1-YK_RG126/2013		Import from public-domain	Das,S.R.; Halpin,R.A.; Lin,X.; Simenauer,A.; Akopov,A.; Fedorova,N.; Puri,V.; Stockwell,T.; Amedeo,P.; Bishop,B.; Katzel,D.; Schobel,S.; Shrivastava,S.; Neumann,G.; Bao,Y.; Sanders,R.; Zhdanov,S.; Kiryutin,B.; Lipman,D.J.; Tatusova,T.; Kawaoka,Y.
EPI637631	PB1	China	2013-Jan-01	EPI_ISL_194380	A/Anhui/1-YK_RG133/2013		Import from public-domain	Das,S.R.; Halpin,R.A.; Lin,X.; Simenauer,A.; Akopov,A.; Fedorova,N.; Puri,V.; Stockwell,T.; Amedeo,P.; Bishop,B.; Katzel,D.; Schobel,S.; Shrivastava,S.; Neumann,G.; Bao,Y.; Sanders,R.; Zhdanov,S.; Kiryutin,B.; Lipman,D.J.; Tatusova,T.; Kawaoka,Y.
EPI637624	PB1	China	2013-Jan-01	EPI_ISL_194379	A/Anhui/1-YK_RG132/2013		Import from public-domain	Das,S.R.; Halpin,R.A.; Lin,X.; Simenauer,A.; Akopov,A.; Fedorova,N.; Puri,V.; Stockwell,T.; Amedeo,P.; Bishop,B.; Katzel,D.; Schobel,S.; Shrivastava,S.; Neumann,G.; Bao,Y.; Sanders,R.; Zhdanov,S.; Kiryutin,B.; Lipman,D.J.; Tatusova,T.; Kawaoka,Y.
EPI637617	PB1	China	2013-Jan-01	EPI_ISL_194378	A/Anhui/1-YK_RG131/2013		Import from public-domain	Das,S.R.; Halpin,R.A.; Lin,X.; Simenauer,A.; Akopov,A.; Fedorova,N.; Puri,V.; Stockwell,T.; Amedeo,P.; Bishop,B.; Katzel,D.; Schobel,S.; Shrivastava,S.; Neumann,G.; Bao,Y.; Sanders,R.; Zhdanov,S.; Kiryutin,B.; Lipman,D.J.; Tatusova,T.; Kawaoka,Y.
EPI637610	PB1	China	2013-Jan-01	EPI_ISL_194377	A/Anhui/1-YK_RG130/2013		Import from public-domain	Das,S.R.; Halpin,R.A.; Lin,X.; Simenauer,A.; Akopov,A.; Fedorova,N.; Puri,V.; Stockwell,T.; Amedeo,P.; Bishop,B.; Katzel,D.; Schobel,S.; Shrivastava,S.; Neumann,G.; Bao,Y.; Sanders,R.; Zhdanov,S.; Kiryutin,B.; Lipman,D.J.; Tatusova,T.; Kawaoka,Y.
EPI637603	PB1	China	2013-Jan-01	EPI_ISL_194376	A/Anhui/1-YK_RG129/2013		Import from public-domain	Das,S.R.; Halpin,R.A.; Lin,X.; Simenauer,A.; Akopov,A.; Fedorova,N.; Puri,V.; Stockwell,T.; Amedeo,P.; Bishop,B.; Katzel,D.; Schobel,S.; Shrivastava,S.; Neumann,G.; Bao,Y.; Sanders,R.; Zhdanov,S.; Kiryutin,B.; Lipman,D.J.; Tatusova,T.; Kawaoka,Y.
EPI637596	PB1	China	2013-Jan-01	EPI_ISL_194375	A/Anhui/1-YK_RG128/2013		Import from public-domain	Das,S.R.; Halpin,R.A.; Lin,X.; Simenauer,A.; Akopov,A.; Fedorova,N.; Puri,V.; Stockwell,T.; Amedeo,P.; Bishop,B.; Katzel,D.; Schobel,S.; Shrivastava,S.; Neumann,G.; Bao,Y.; Sanders,R.; Zhdanov,S.; Kiryutin,B.; Lipman,D.J.; Tatusova,T.; Kawaoka,Y.
EPI637589	PB1	China	2013-Jan-01	EPI_ISL_194374	A/Anhui/1-YK_RG127/2013		Import from public-domain	Das,S.R.; Halpin,R.A.; Lin,X.; Simenauer,A.; Akopov,A.; Fedorova,N.; Puri,V.; Stockwell,T.; Amedeo,P.; Bishop,B.; Katzel,D.; Schobel,S.; Shrivastava,S.; Neumann,G.; Bao,Y.; Sanders,R.; Zhdanov,S.; Kiryutin,B.; Lipman,D.J.; Tatusova,T.; Kawaoka,Y.
EPI637575	PB1	China	2013-Jan-01	EPI_ISL_194373	A/Anhui/1-YK_RG125/2013		Import from public-domain	Das,S.R.; Halpin,R.A.; Lin,X.; Simenauer,A.; Akopov,A.; Fedorova,N.; Puri,V.; Stockwell,T.; Amedeo,P.; Bishop,B.; Katzel,D.; Schobel,S.; Shrivastava,S.; Neumann,G.; Bao,Y.; Sanders,R.; Zhdanov,S.; Kiryutin,B.; Lipman,D.J.; Tatusova,T.; Kawaoka,Y.
EPI637430	PB1	China	2013-Jan-01	EPI_ISL_194372	A/Anhui/1-YK_RG105/2013		Import from public-domain	Das,S.R.; Halpin,R.A.; Lin,X.; Simenauer,A.; Akopov,A.; Fedorova,N.; Puri,V.; Stockwell,T.; Amedeo,P.; Bishop,B.; Katzel,D.; Schobel,S.; Shrivastava,S.; Neumann,G.; Bao,Y.; Sanders,R.; Zhdanov,S.; Kiryutin,B.; Lipman,D.J.; Tatusova,T.; Kawaoka,Y.
EPI637568	PB1	China	2013-Jan-01	EPI_ISL_194371	A/Anhui/1-YK_RG124/2013		Import from public-domain	Das,S.R.; Halpin,R.A.; Lin,X.; Simenauer,A.; Akopov,A.; Fedorova,N.; Puri,V.; Stockwell,T.; Amedeo,P.; Bishop,B.; Katzel,D.; Schobel,S.; Shrivastava,S.; Neumann,G.; Bao,Y.; Sanders,R.; Zhdanov,S.; Kiryutin,B.; Lipman,D.J.; Tatusova,T.; Kawaoka,Y.
EPI637561	PB1	China	2013-Jan-01	EPI_ISL_194370	A/Anhui/1-YK_RG123/2013		Import from public-domain	Das,S.R.; Halpin,R.A.; Lin,X.; Simenauer,A.; Akopov,A.; Fedorova,N.; Puri,V.; Stockwell,T.; Amedeo,P.; Bishop,B.; Katzel,D.; Schobel,S.; Shrivastava,S.; Neumann,G.; Bao,Y.; Sanders,R.; Zhdanov,S.; Kiryutin,B.; Lipman,D.J.; Tatusova,T.; Kawaoka,Y.
EPI637554	PB1	China	2013-Jan-01	EPI_ISL_194369	A/Anhui/1-YK_RG122/2013		Import from public-domain	Das,S.R.; Halpin,R.A.; Lin,X.; Simenauer,A.; Akopov,A.; Fedorova,N.; Puri,V.; Stockwell,T.; Amedeo,P.; Bishop,B.; Katzel,D.; Schobel,S.; Shrivastava,S.; Neumann,G.; Bao,Y.; Sanders,R.; Zhdanov,S.; Kiryutin,B.; Lipman,D.J.; Tatusova,T.; Kawaoka,Y.
EPI637547	PB1	China	2013-Jan-01	EPI_ISL_194368	A/Anhui/1-YK_RG121/2013		Import from public-domain	Das,S.R.; Halpin,R.A.; Lin,X.; Simenauer,A.; Akopov,A.; Fedorova,N.; Puri,V.; Stockwell,T.; Amedeo,P.; Bishop,B.; Katzel,D.; Schobel,S.; Shrivastava,S.; Neumann,G.; Bao,Y.; Sanders,R.; Zhdanov,S.; Kiryutin,B.; Lipman,D.J.; Tatusova,T.; Kawaoka,Y.
EPI637540	PB1	China	2013-Jan-01	EPI_ISL_194367	A/Anhui/1-YK_RG120/2013		Import from public-domain	Das,S.R.; Halpin,R.A.; Lin,X.; Simenauer,A.; Akopov,A.; Fedorova,N.; Puri,V.; Stockwell,T.; Amedeo,P.; Bishop,B.; Katzel,D.; Schobel,S.; Shrivastava,S.; Neumann,G.; Bao,Y.; Sanders,R.; Zhdanov,S.; Kiryutin,B.; Lipman,D.J.; Tatusova,T.; Kawaoka,Y.
EPI637533	PB1	China	2013-Jan-01	EPI_ISL_194366	A/Anhui/1-YK_RG119/2013		Import from public-domain	Das,S.R.; Halpin,R.A.; Lin,X.; Simenauer,A.; Akopov,A.; Fedorova,N.; Puri,V.; Stockwell,T.; Amedeo,P.; Bishop,B.; Katzel,D.; Schobel,S.; Shrivastava,S.; Neumann,G.; Bao,Y.; Sanders,R.; Zhdanov,S.; Kiryutin,B.; Lipman,D.J.; Tatusova,T.; Kawaoka,Y.
EPI637526	PB1	China	2013-Jan-01	EPI_ISL_194365	A/Anhui/1-YK_RG118/2013		Import from public-domain	Das,S.R.; Halpin,R.A.; Lin,X.; Simenauer,A.; Akopov,A.; Fedorova,N.; Puri,V.; Stockwell,T.; Amedeo,P.; Bishop,B.; Katzel,D.; Schobel,S.; Shrivastava,S.; Neumann,G.; Bao,Y.; Sanders,R.; Zhdanov,S.; Kiryutin,B.; Lipman,D.J.; Tatusova,T.; Kawaoka,Y.
EPI637519	PB1	China	2013-Jan-01	EPI_ISL_194364	A/Anhui/1-YK_RG117/2013		Import from public-domain	Das,S.R.; Halpin,R.A.; Lin,X.; Simenauer,A.; Akopov,A.; Fedorova,N.; Puri,V.; Stockwell,T.; Amedeo,P.; Bishop,B.; Katzel,D.; Schobel,S.; Shrivastava,S.; Neumann,G.; Bao,Y.; Sanders,R.; Zhdanov,S.; Kiryutin,B.; Lipman,D.J.; Tatusova,T.; Kawaoka,Y.
EPI637512	PB1	China	2013-Jan-01	EPI_ISL_194363	A/Anhui/1-YK_RG116/2013		Import from public-domain	Das,S.R.; Halpin,R.A.; Lin,X.; Simenauer,A.; Akopov,A.; Fedorova,N.; Puri,V.; Stockwell,T.; Amedeo,P.; Bishop,B.; Katzel,D.; Schobel,S.; Shrivastava,S.; Neumann,G.; Bao,Y.; Sanders,R.; Zhdanov,S.; Kiryutin,B.; Lipman,D.J.; Tatusova,T.; Kawaoka,Y.
EPI637505	PB1	China	2013-Jan-01	EPI_ISL_194362	A/Anhui/1-YK_RG115/2013		Import from public-domain	Das,S.R.; Halpin,R.A.; Lin,X.; Simenauer,A.; Akopov,A.; Fedorova,N.; Puri,V.; Stockwell,T.; Amedeo,P.; Bishop,B.; Katzel,D.; Schobel,S.; Shrivastava,S.; Neumann,G.; Bao,Y.; Sanders,R.; Zhdanov,S.; Kiryutin,B.; Lipman,D.J.; Tatusova,T.; Kawaoka,Y.
EPI637498	PB1	China	2013-Jan-01	EPI_ISL_194361	A/Anhui/1-YK_RG114/2013		Import from public-domain	Das,S.R.; Halpin,R.A.; Lin,X.; Simenauer,A.; Akopov,A.; Fedorova,N.; Puri,V.; Stockwell,T.; Amedeo,P.; Bishop,B.; Katzel,D.; Schobel,S.; Shrivastava,S.; Neumann,G.; Bao,Y.; Sanders,R.; Zhdanov,S.; Kiryutin,B.; Lipman,D.J.; Tatusova,T.; Kawaoka,Y.
EPI637491	PB1	China	2013-Jan-01	EPI_ISL_194360	A/Anhui/1-YK_RG113/2013		Import from public-domain	Das,S.R.; Halpin,R.A.; Lin,X.; Simenauer,A.; Akopov,A.; Fedorova,N.; Puri,V.; Stockwell,T.; Amedeo,P.; Bishop,B.; Katzel,D.; Schobel,S.; Shrivastava,S.; Neumann,G.; Bao,Y.; Sanders,R.; Zhdanov,S.; Kiryutin,B.; Lipman,D.J.; Tatusova,T.; Kawaoka,Y.
EPI637479	PB1	China	2013-Jan-01	EPI_ISL_194359	A/Anhui/1-YK_RG112/2013		Import from public-domain	Das,S.R.; Halpin,R.A.; Lin,X.; Simenauer,A.; Akopov,A.; Fedorova,N.; Puri,V.; Stockwell,T.; Amedeo,P.; Bishop,B.; Katzel,D.; Schobel,S.; Shrivastava,S.; Neumann,G.; Bao,Y.; Sanders,R.; Zhdanov,S.; Kiryutin,B.; Lipman,D.J.; Tatusova,T.; Kawaoka,Y.
EPI637472	PB1	China	2013-Jan-01	EPI_ISL_194358	A/Anhui/1-YK_RG111/2013		Import from public-domain	Das,S.R.; Halpin,R.A.; Lin,X.; Simenauer,A.; Akopov,A.; Fedorova,N.; Puri,V.; Stockwell,T.; Amedeo,P.; Bishop,B.; Katzel,D.; Schobel,S.; Shrivastava,S.; Neumann,G.; Bao,Y.; Sanders,R.; Zhdanov,S.; Kiryutin,B.; Lipman,D.J.; Tatusova,T.; Kawaoka,Y.
EPI637465	PB1	China	2013-Jan-01	EPI_ISL_194357	A/Anhui/1-YK_RG110/2013		Import from public-domain	Das,S.R.; Halpin,R.A.; Lin,X.; Simenauer,A.; Akopov,A.; Fedorova,N.; Puri,V.; Stockwell,T.; Amedeo,P.; Bishop,B.; Katzel,D.; Schobel,S.; Shrivastava,S.; Neumann,G.; Bao,Y.; Sanders,R.; Zhdanov,S.; Kiryutin,B.; Lipman,D.J.; Tatusova,T.; Kawaoka,Y.
EPI637458	PB1	China	2013-Jan-01	EPI_ISL_194356	A/Anhui/1-YK_RG109/2013		Import from public-domain	Das,S.R.; Halpin,R.A.; Lin,X.; Simenauer,A.; Akopov,A.; Fedorova,N.; Puri,V.; Stockwell,T.; Amedeo,P.; Bishop,B.; Katzel,D.; Schobel,S.; Shrivastava,S.; Neumann,G.; Bao,Y.; Sanders,R.; Zhdanov,S.; Kiryutin,B.; Lipman,D.J.; Tatusova,T.; Kawaoka,Y.
EPI637451	PB1	China	2013-Jan-01	EPI_ISL_194355	A/Anhui/1-YK_RG108/2013		Import from public-domain	Das,S.R.; Halpin,R.A.; Lin,X.; Simenauer,A.; Akopov,A.; Fedorova,N.; Puri,V.; Stockwell,T.; Amedeo,P.; Bishop,B.; Katzel,D.; Schobel,S.; Shrivastava,S.; Neumann,G.; Bao,Y.; Sanders,R.; Zhdanov,S.; Kiryutin,B.; Lipman,D.J.; Tatusova,T.; Kawaoka,Y.
EPI637444	PB1	China	2013-Jan-01	EPI_ISL_194354	A/Anhui/1-YK_RG107/2013		Import from public-domain	Das,S.R.; Halpin,R.A.; Lin,X.; Simenauer,A.; Akopov,A.; Fedorova,N.; Puri,V.; Stockwell,T.; Amedeo,P.; Bishop,B.; Katzel,D.; Schobel,S.; Shrivastava,S.; Neumann,G.; Bao,Y.; Sanders,R.; Zhdanov,S.; Kiryutin,B.; Lipman,D.J.; Tatusova,T.; Kawaoka,Y.
EPI637437	PB1	China	2013-Jan-01	EPI_ISL_194353	A/Anhui/1-YK_RG106/2013		Import from public-domain	Das,S.R.; Halpin,R.A.; Lin,X.; Simenauer,A.; Akopov,A.; Fedorova,N.; Puri,V.; Stockwell,T.; Amedeo,P.; Bishop,B.; Katzel,D.; Schobel,S.; Shrivastava,S.; Neumann,G.; Bao,Y.; Sanders,R.; Zhdanov,S.; Kiryutin,B.; Lipman,D.J.; Tatusova,T.; Kawaoka,Y.
EPI637222	PB1	China	2013-Jan-01	EPI_ISL_194352	A/Anhui/1-YK_RG76/2013		Import from public-domain	Das,S.R.; Halpin,R.A.; Lin,X.; Simenauer,A.; Akopov,A.; Fedorova,N.; Puri,V.; Stockwell,T.; Amedeo,P.; Bishop,B.; Katzel,D.; Schobel,S.; Shrivastava,S.; Neumann,G.; Bao,Y.; Sanders,R.; Zhdanov,S.; Kiryutin,B.; Lipman,D.J.; Tatusova,T.; Kawaoka,Y.
EPI637423	PB1	China	2013-Jan-01	EPI_ISL_194351	A/Anhui/1-YK_RG104/2013		Import from public-domain	Das,S.R.; Halpin,R.A.; Lin,X.; Simenauer,A.; Akopov,A.; Fedorova,N.; Puri,V.; Stockwell,T.; Amedeo,P.; Bishop,B.; Katzel,D.; Schobel,S.; Shrivastava,S.; Neumann,G.; Bao,Y.; Sanders,R.; Zhdanov,S.; Kiryutin,B.; Lipman,D.J.; Tatusova,T.; Kawaoka,Y.
EPI637416	PB1	China	2013-Jan-01	EPI_ISL_194350	A/Anhui/1-YK_RG103/2013		Import from public-domain	Das,S.R.; Halpin,R.A.; Lin,X.; Simenauer,A.; Akopov,A.; Fedorova,N.; Puri,V.; Stockwell,T.; Amedeo,P.; Bishop,B.; Katzel,D.; Schobel,S.; Shrivastava,S.; Neumann,G.; Bao,Y.; Sanders,R.; Zhdanov,S.; Kiryutin,B.; Lipman,D.J.; Tatusova,T.; Kawaoka,Y.
EPI637409	PB1	China	2013-Jan-01	EPI_ISL_194349	A/Anhui/1-YK_RG102/2013		Import from public-domain	Das,S.R.; Halpin,R.A.; Lin,X.; Simenauer,A.; Akopov,A.; Fedorova,N.; Puri,V.; Stockwell,T.; Amedeo,P.; Bishop,B.; Katzel,D.; Schobel,S.; Shrivastava,S.; Neumann,G.; Bao,Y.; Sanders,R.; Zhdanov,S.; Kiryutin,B.; Lipman,D.J.; Tatusova,T.; Kawaoka,Y.
EPI637402	PB1	China	2013-Jan-01	EPI_ISL_194348	A/Anhui/1-YK_RG101/2013		Import from public-domain	Das,S.R.; Halpin,R.A.; Lin,X.; Simenauer,A.; Akopov,A.; Fedorova,N.; Puri,V.; Stockwell,T.; Amedeo,P.; Bishop,B.; Katzel,D.; Schobel,S.; Shrivastava,S.; Neumann,G.; Bao,Y.; Sanders,R.; Zhdanov,S.; Kiryutin,B.; Lipman,D.J.; Tatusova,T.; Kawaoka,Y.
EPI637395	PB1	China	2013-Jan-01	EPI_ISL_194347	A/Anhui/1-YK_RG100/2013		Import from public-domain	Das,S.R.; Halpin,R.A.; Lin,X.; Simenauer,A.; Akopov,A.; Fedorova,N.; Puri,V.; Stockwell,T.; Amedeo,P.; Bishop,B.; Katzel,D.; Schobel,S.; Shrivastava,S.; Neumann,G.; Bao,Y.; Sanders,R.; Zhdanov,S.; Kiryutin,B.; Lipman,D.J.; Tatusova,T.; Kawaoka,Y.
EPI637388	PB1	China	2013-Jan-01	EPI_ISL_194346	A/Anhui/1-YK_RG99/2013		Import from public-domain	Das,S.R.; Halpin,R.A.; Lin,X.; Simenauer,A.; Akopov,A.; Fedorova,N.; Puri,V.; Stockwell,T.; Amedeo,P.; Bishop,B.; Katzel,D.; Schobel,S.; Shrivastava,S.; Neumann,G.; Bao,Y.; Sanders,R.; Zhdanov,S.; Kiryutin,B.; Lipman,D.J.; Tatusova,T.; Kawaoka,Y.
EPI637381	PB1	China	2013-Jan-01	EPI_ISL_194345	A/Anhui/1-YK_RG98/2013		Import from public-domain	Das,S.R.; Halpin,R.A.; Lin,X.; Simenauer,A.; Akopov,A.; Fedorova,N.; Puri,V.; Stockwell,T.; Amedeo,P.; Bishop,B.; Katzel,D.; Schobel,S.; Shrivastava,S.; Neumann,G.; Bao,Y.; Sanders,R.; Zhdanov,S.; Kiryutin,B.; Lipman,D.J.; Tatusova,T.; Kawaoka,Y.
EPI637374	PB1	China	2013-Jan-01	EPI_ISL_194344	A/Anhui/1-YK_RG97/2013		Import from public-domain	Das,S.R.; Halpin,R.A.; Lin,X.; Simenauer,A.; Akopov,A.; Fedorova,N.; Puri,V.; Stockwell,T.; Amedeo,P.; Bishop,B.; Katzel,D.; Schobel,S.; Shrivastava,S.; Neumann,G.; Bao,Y.; Sanders,R.; Zhdanov,S.; Kiryutin,B.; Lipman,D.J.; Tatusova,T.; Kawaoka,Y.
EPI637367	PB1	China	2013-Jan-01	EPI_ISL_194343	A/Anhui/1-YK_RG96/2013		Import from public-domain	Das,S.R.; Halpin,R.A.; Lin,X.; Simenauer,A.; Akopov,A.; Fedorova,N.; Puri,V.; Stockwell,T.; Amedeo,P.; Bishop,B.; Katzel,D.; Schobel,S.; Shrivastava,S.; Neumann,G.; Bao,Y.; Sanders,R.; Zhdanov,S.; Kiryutin,B.; Lipman,D.J.; Tatusova,T.; Kawaoka,Y.
EPI637360	PB1	China	2013-Jan-01	EPI_ISL_194342	A/Anhui/1-YK_RG95/2013		Import from public-domain	Das,S.R.; Halpin,R.A.; Lin,X.; Simenauer,A.; Akopov,A.; Fedorova,N.; Puri,V.; Stockwell,T.; Amedeo,P.; Bishop,B.; Katzel,D.; Schobel,S.; Shrivastava,S.; Neumann,G.; Bao,Y.; Sanders,R.; Zhdanov,S.; Kiryutin,B.; Lipman,D.J.; Tatusova,T.; Kawaoka,Y.
EPI637353	PB1	China	2013-Jan-01	EPI_ISL_194341	A/Anhui/1-YK_RG94/2013		Import from public-domain	Das,S.R.; Halpin,R.A.; Lin,X.; Simenauer,A.; Akopov,A.; Fedorova,N.; Puri,V.; Stockwell,T.; Amedeo,P.; Bishop,B.; Katzel,D.; Schobel,S.; Shrivastava,S.; Neumann,G.; Bao,Y.; Sanders,R.; Zhdanov,S.; Kiryutin,B.; Lipman,D.J.; Tatusova,T.; Kawaoka,Y.
EPI637345	PB1	China	2013-Jan-01	EPI_ISL_194340	A/Anhui/1-YK_RG93/2013		Import from public-domain	Das,S.R.; Halpin,R.A.; Lin,X.; Simenauer,A.; Akopov,A.; Fedorova,N.; Puri,V.; Stockwell,T.; Amedeo,P.; Bishop,B.; Katzel,D.; Schobel,S.; Shrivastava,S.; Neumann,G.; Bao,Y.; Sanders,R.; Zhdanov,S.; Kiryutin,B.; Lipman,D.J.; Tatusova,T.; Kawaoka,Y.
EPI637338	PB1	China	2013-Jan-01	EPI_ISL_194339	A/Anhui/1-YK_RG92/2013		Import from public-domain	Das,S.R.; Halpin,R.A.; Lin,X.; Simenauer,A.; Akopov,A.; Fedorova,N.; Puri,V.; Stockwell,T.; Amedeo,P.; Bishop,B.; Katzel,D.; Schobel,S.; Shrivastava,S.; Neumann,G.; Bao,Y.; Sanders,R.; Zhdanov,S.; Kiryutin,B.; Lipman,D.J.; Tatusova,T.; Kawaoka,Y.
EPI637331	PB1	China	2013-Jan-01	EPI_ISL_194338	A/Anhui/1-YK_RG91/2013		Import from public-domain	Das,S.R.; Halpin,R.A.; Lin,X.; Simenauer,A.; Akopov,A.; Fedorova,N.; Puri,V.; Stockwell,T.; Amedeo,P.; Bishop,B.; Katzel,D.; Schobel,S.; Shrivastava,S.; Neumann,G.; Bao,Y.; Sanders,R.; Zhdanov,S.; Kiryutin,B.; Lipman,D.J.; Tatusova,T.; Kawaoka,Y.
EPI637324	PB1	China	2013-Jan-01	EPI_ISL_194337	A/Anhui/1-YK_RG90/2013		Import from public-domain	Das,S.R.; Halpin,R.A.; Lin,X.; Simenauer,A.; Akopov,A.; Fedorova,N.; Puri,V.; Stockwell,T.; Amedeo,P.; Bishop,B.; Katzel,D.; Schobel,S.; Shrivastava,S.; Neumann,G.; Bao,Y.; Sanders,R.; Zhdanov,S.; Kiryutin,B.; Lipman,D.J.; Tatusova,T.; Kawaoka,Y.
EPI637317	PB1	China	2013-Jan-01	EPI_ISL_194336	A/Anhui/1-YK_RG89/2013		Import from public-domain	Das,S.R.; Halpin,R.A.; Lin,X.; Simenauer,A.; Akopov,A.; Fedorova,N.; Puri,V.; Stockwell,T.; Amedeo,P.; Bishop,B.; Katzel,D.; Schobel,S.; Shrivastava,S.; Neumann,G.; Bao,Y.; Sanders,R.; Zhdanov,S.; Kiryutin,B.; Lipman,D.J.; Tatusova,T.; Kawaoka,Y.
EPI637310	PB1	China	2013-Jan-01	EPI_ISL_194335	A/Anhui/1-YK_RG88/2013		Import from public-domain	Das,S.R.; Halpin,R.A.; Lin,X.; Simenauer,A.; Akopov,A.; Fedorova,N.; Puri,V.; Stockwell,T.; Amedeo,P.; Bishop,B.; Katzel,D.; Schobel,S.; Shrivastava,S.; Neumann,G.; Bao,Y.; Sanders,R.; Zhdanov,S.; Kiryutin,B.; Lipman,D.J.; Tatusova,T.; Kawaoka,Y.
EPI637303	PB1	China	2013-Jan-01	EPI_ISL_194334	A/Anhui/1-YK_RG87/2013		Import from public-domain	Das,S.R.; Halpin,R.A.; Lin,X.; Simenauer,A.; Akopov,A.; Fedorova,N.; Puri,V.; Stockwell,T.; Amedeo,P.; Bishop,B.; Katzel,D.; Schobel,S.; Shrivastava,S.; Neumann,G.; Bao,Y.; Sanders,R.; Zhdanov,S.; Kiryutin,B.; Lipman,D.J.; Tatusova,T.; Kawaoka,Y.
EPI637295	PB1	China	2013-Jan-01	EPI_ISL_194333	A/Anhui/1-YK_RG86/2013		Import from public-domain	Das,S.R.; Halpin,R.A.; Lin,X.; Simenauer,A.; Akopov,A.; Fedorova,N.; Puri,V.; Stockwell,T.; Amedeo,P.; Bishop,B.; Katzel,D.; Schobel,S.; Shrivastava,S.; Neumann,G.; Bao,Y.; Sanders,R.; Zhdanov,S.; Kiryutin,B.; Lipman,D.J.; Tatusova,T.; Kawaoka,Y.
EPI637288	PB1	China	2013-Jan-01	EPI_ISL_194332	A/Anhui/1-YK_RG85/2013		Import from public-domain	Das,S.R.; Halpin,R.A.; Lin,X.; Simenauer,A.; Akopov,A.; Fedorova,N.; Puri,V.; Stockwell,T.; Amedeo,P.; Bishop,B.; Katzel,D.; Schobel,S.; Shrivastava,S.; Neumann,G.; Bao,Y.; Sanders,R.; Zhdanov,S.; Kiryutin,B.; Lipman,D.J.; Tatusova,T.; Kawaoka,Y.
EPI637280	PB1	China	2013-Jan-01	EPI_ISL_194331	A/Anhui/1-YK_RG84/2013		Import from public-domain	Das,S.R.; Halpin,R.A.; Lin,X.; Simenauer,A.; Akopov,A.; Fedorova,N.; Puri,V.; Stockwell,T.; Amedeo,P.; Bishop,B.; Katzel,D.; Schobel,S.; Shrivastava,S.; Neumann,G.; Bao,Y.; Sanders,R.; Zhdanov,S.; Kiryutin,B.; Lipman,D.J.; Tatusova,T.; Kawaoka,Y.
EPI637273	PB1	China	2013-Jan-01	EPI_ISL_194330	A/Anhui/1-YK_RG83/2013		Import from public-domain	Das,S.R.; Halpin,R.A.; Lin,X.; Simenauer,A.; Akopov,A.; Fedorova,N.; Puri,V.; Stockwell,T.; Amedeo,P.; Bishop,B.; Katzel,D.; Schobel,S.; Shrivastava,S.; Neumann,G.; Bao,Y.; Sanders,R.; Zhdanov,S.; Kiryutin,B.; Lipman,D.J.; Tatusova,T.; Kawaoka,Y.
EPI637266	PB1	China	2013-Jan-01	EPI_ISL_194329	A/Anhui/1-YK_RG82/2013		Import from public-domain	Das,S.R.; Halpin,R.A.; Lin,X.; Simenauer,A.; Akopov,A.; Fedorova,N.; Puri,V.; Stockwell,T.; Amedeo,P.; Bishop,B.; Katzel,D.; Schobel,S.; Shrivastava,S.; Neumann,G.; Bao,Y.; Sanders,R.; Zhdanov,S.; Kiryutin,B.; Lipman,D.J.; Tatusova,T.; Kawaoka,Y.
EPI637257	PB1	China	2013-Jan-01	EPI_ISL_194328	A/Anhui/1-YK_RG81/2013		Import from public-domain	Das,S.R.; Halpin,R.A.; Lin,X.; Simenauer,A.; Akopov,A.; Fedorova,N.; Puri,V.; Stockwell,T.; Amedeo,P.; Bishop,B.; Katzel,D.; Schobel,S.; Shrivastava,S.; Neumann,G.; Bao,Y.; Sanders,R.; Zhdanov,S.; Kiryutin,B.; Lipman,D.J.; Tatusova,T.; Kawaoka,Y.
EPI637250	PB1	China	2013-Jan-01	EPI_ISL_194327	A/Anhui/1-YK_RG80/2013		Import from public-domain	Das,S.R.; Halpin,R.A.; Lin,X.; Simenauer,A.; Akopov,A.; Fedorova,N.; Puri,V.; Stockwell,T.; Amedeo,P.; Bishop,B.; Katzel,D.; Schobel,S.; Shrivastava,S.; Neumann,G.; Bao,Y.; Sanders,R.; Zhdanov,S.; Kiryutin,B.; Lipman,D.J.; Tatusova,T.; Kawaoka,Y.
EPI637243	PB1	China	2013-Jan-01	EPI_ISL_194326	A/Anhui/1-YK_RG79/2013		Import from public-domain	Das,S.R.; Halpin,R.A.; Lin,X.; Simenauer,A.; Akopov,A.; Fedorova,N.; Puri,V.; Stockwell,T.; Amedeo,P.; Bishop,B.; Katzel,D.; Schobel,S.; Shrivastava,S.; Neumann,G.; Bao,Y.; Sanders,R.; Zhdanov,S.; Kiryutin,B.; Lipman,D.J.; Tatusova,T.; Kawaoka,Y.
EPI637236	PB1	China	2013-Jan-01	EPI_ISL_194325	A/Anhui/1-YK_RG78/2013		Import from public-domain	Das,S.R.; Halpin,R.A.; Lin,X.; Simenauer,A.; Akopov,A.; Fedorova,N.; Puri,V.; Stockwell,T.; Amedeo,P.; Bishop,B.; Katzel,D.; Schobel,S.; Shrivastava,S.; Neumann,G.; Bao,Y.; Sanders,R.; Zhdanov,S.; Kiryutin,B.; Lipman,D.J.; Tatusova,T.; Kawaoka,Y.
EPI637229	PB1	China	2013-Jan-01	EPI_ISL_194324	A/Anhui/1-YK_RG77/2013		Import from public-domain	Das,S.R.; Halpin,R.A.; Lin,X.; Simenauer,A.; Akopov,A.; Fedorova,N.; Puri,V.; Stockwell,T.; Amedeo,P.; Bishop,B.; Katzel,D.; Schobel,S.; Shrivastava,S.; Neumann,G.; Bao,Y.; Sanders,R.; Zhdanov,S.; Kiryutin,B.; Lipman,D.J.; Tatusova,T.; Kawaoka,Y.
EPI637203	PB1	China	2013-Jan-01	EPI_ISL_194323	A/Anhui/1-YK_RG75/2013		Import from public-domain	Das,S.R.; Halpin,R.A.; Lin,X.; Simenauer,A.; Akopov,A.; Fedorova,N.; Puri,V.; Stockwell,T.; Amedeo,P.; Bishop,B.; Katzel,D.; Schobel,S.; Shrivastava,S.; Neumann,G.; Bao,Y.; Sanders,R.; Zhdanov,S.; Kiryutin,B.; Lipman,D.J.; Tatusova,T.; Kawaoka,Y.
EPI637189	PB1	China	2013-Jan-01	EPI_ISL_194322	A/Anhui/1-YK_RG73/2013		Import from public-domain	Das,S.R.; Halpin,R.A.; Lin,X.; Simenauer,A.; Akopov,A.; Fedorova,N.; Puri,V.; Stockwell,T.; Amedeo,P.; Bishop,B.; Katzel,D.; Schobel,S.; Shrivastava,S.; Neumann,G.; Bao,Y.; Sanders,R.; Zhdanov,S.; Kiryutin,B.; Lipman,D.J.; Tatusova,T.; Kawaoka,Y.
EPI637196	PB1	China	2013-Jan-01	EPI_ISL_194321	A/Anhui/1-YK_RG74/2013		Import from public-domain	Das,S.R.; Halpin,R.A.; Lin,X.; Simenauer,A.; Akopov,A.; Fedorova,N.; Puri,V.; Stockwell,T.; Amedeo,P.; Bishop,B.; Katzel,D.; Schobel,S.; Shrivastava,S.; Neumann,G.; Bao,Y.; Sanders,R.; Zhdanov,S.; Kiryutin,B.; Lipman,D.J.; Tatusova,T.; Kawaoka,Y.
EPI637068	PB1	China	2015-Aug-27	EPI_ISL_194320	A/Anhui/1-YK_RG56/2013		Import from public-domain	Das,S.R.; Halpin,R.A.; Lin,X.; Simenauer,A.; Akopov,A.; Fedorova,N.; Puri,V.; Stockwell,T.; Amedeo,P.; Bishop,B.; Katzel,D.; Schobel,S.; Shrivastava,S.; Neumann,G.; Bao,Y.; Sanders,R.; Zhdanov,S.; Kiryutin,B.; Lipman,D.J.; Tatusova,T.; Kawaoka,Y.
EPI637182	PB1	China	2013-Jan-01	EPI_ISL_194319	A/Anhui/1-YK_RG72/2013		Import from public-domain	Das,S.R.; Halpin,R.A.; Lin,X.; Simenauer,A.; Akopov,A.; Fedorova,N.; Puri,V.; Stockwell,T.; Amedeo,P.; Bishop,B.; Katzel,D.; Schobel,S.; Shrivastava,S.; Neumann,G.; Bao,Y.; Sanders,R.; Zhdanov,S.; Kiryutin,B.; Lipman,D.J.; Tatusova,T.; Kawaoka,Y.
EPI637175	PB1	China	2013-Jan-01	EPI_ISL_194318	A/Anhui/1-YK_RG71/2013		Import from public-domain	Das,S.R.; Halpin,R.A.; Lin,X.; Simenauer,A.; Akopov,A.; Fedorova,N.; Puri,V.; Stockwell,T.; Amedeo,P.; Bishop,B.; Katzel,D.; Schobel,S.; Shrivastava,S.; Neumann,G.; Bao,Y.; Sanders,R.; Zhdanov,S.; Kiryutin,B.; Lipman,D.J.; Tatusova,T.; Kawaoka,Y.
EPI637167	PB1	China	2013-Jan-01	EPI_ISL_194317	A/Anhui/1-YK_RG70/2013		Import from public-domain	Das,S.R.; Halpin,R.A.; Lin,X.; Simenauer,A.; Akopov,A.; Fedorova,N.; Puri,V.; Stockwell,T.; Amedeo,P.; Bishop,B.; Katzel,D.; Schobel,S.; Shrivastava,S.; Neumann,G.; Bao,Y.; Sanders,R.; Zhdanov,S.; Kiryutin,B.; Lipman,D.J.; Tatusova,T.; Kawaoka,Y.
EPI637159	PB1	China	2013-Jan-01	EPI_ISL_194316	A/Anhui/1-YK_RG69/2013		Import from public-domain	Das,S.R.; Halpin,R.A.; Lin,X.; Simenauer,A.; Akopov,A.; Fedorova,N.; Puri,V.; Stockwell,T.; Amedeo,P.; Bishop,B.; Katzel,D.; Schobel,S.; Shrivastava,S.; Neumann,G.; Bao,Y.; Sanders,R.; Zhdanov,S.; Kiryutin,B.; Lipman,D.J.; Tatusova,T.; Kawaoka,Y.
EPI637152	PB1	China	2013-Jan-01	EPI_ISL_194315	A/Anhui/1-YK_RG68/2013		Import from public-domain	Das,S.R.; Halpin,R.A.; Lin,X.; Simenauer,A.; Akopov,A.; Fedorova,N.; Puri,V.; Stockwell,T.; Amedeo,P.; Bishop,B.; Katzel,D.; Schobel,S.; Shrivastava,S.; Neumann,G.; Bao,Y.; Sanders,R.; Zhdanov,S.; Kiryutin,B.; Lipman,D.J.; Tatusova,T.; Kawaoka,Y.
EPI637145	PB1	China	2013-Jan-01	EPI_ISL_194314	A/Anhui/1-YK_RG67/2013		Import from public-domain	Das,S.R.; Halpin,R.A.; Lin,X.; Simenauer,A.; Akopov,A.; Fedorova,N.; Puri,V.; Stockwell,T.; Amedeo,P.; Bishop,B.; Katzel,D.; Schobel,S.; Shrivastava,S.; Neumann,G.; Bao,Y.; Sanders,R.; Zhdanov,S.; Kiryutin,B.; Lipman,D.J.; Tatusova,T.; Kawaoka,Y.
EPI637138	PB1	China	2013-Jan-01	EPI_ISL_194313	A/Anhui/1-YK_RG66/2013		Import from public-domain	Das,S.R.; Halpin,R.A.; Lin,X.; Simenauer,A.; Akopov,A.; Fedorova,N.; Puri,V.; Stockwell,T.; Amedeo,P.; Bishop,B.; Katzel,D.; Schobel,S.; Shrivastava,S.; Neumann,G.; Bao,Y.; Sanders,R.; Zhdanov,S.; Kiryutin,B.; Lipman,D.J.; Tatusova,T.; Kawaoka,Y.
EPI637131	PB1	China	2013-Jan-01	EPI_ISL_194312	A/Anhui/1-YK_RG65/2013		Import from public-domain	Das,S.R.; Halpin,R.A.; Lin,X.; Simenauer,A.; Akopov,A.; Fedorova,N.; Puri,V.; Stockwell,T.; Amedeo,P.; Bishop,B.; Katzel,D.; Schobel,S.; Shrivastava,S.; Neumann,G.; Bao,Y.; Sanders,R.; Zhdanov,S.; Kiryutin,B.; Lipman,D.J.; Tatusova,T.; Kawaoka,Y.
EPI637124	PB1	China	2013-Jan-01	EPI_ISL_194311	A/Anhui/1-YK_RG64/2013		Import from public-domain	Das,S.R.; Halpin,R.A.; Lin,X.; Simenauer,A.; Akopov,A.; Fedorova,N.; Puri,V.; Stockwell,T.; Amedeo,P.; Bishop,B.; Katzel,D.; Schobel,S.; Shrivastava,S.; Neumann,G.; Bao,Y.; Sanders,R.; Zhdanov,S.; Kiryutin,B.; Lipman,D.J.; Tatusova,T.; Kawaoka,Y.
EPI637117	PB1	China	2013-Jan-01	EPI_ISL_194310	A/Anhui/1-YK_RG63/2013		Import from public-domain	Das,S.R.; Halpin,R.A.; Lin,X.; Simenauer,A.; Akopov,A.; Fedorova,N.; Puri,V.; Stockwell,T.; Amedeo,P.; Bishop,B.; Katzel,D.; Schobel,S.; Shrivastava,S.; Neumann,G.; Bao,Y.; Sanders,R.; Zhdanov,S.; Kiryutin,B.; Lipman,D.J.; Tatusova,T.; Kawaoka,Y.
EPI637110	PB1	China	2013-Jan-01	EPI_ISL_194309	A/Anhui/1-YK_RG62/2013		Import from public-domain	Das,S.R.; Halpin,R.A.; Lin,X.; Simenauer,A.; Akopov,A.; Fedorova,N.; Puri,V.; Stockwell,T.; Amedeo,P.; Bishop,B.; Katzel,D.; Schobel,S.; Shrivastava,S.; Neumann,G.; Bao,Y.; Sanders,R.; Zhdanov,S.; Kiryutin,B.; Lipman,D.J.; Tatusova,T.; Kawaoka,Y.
EPI637103	PB1	China	2013-Jan-01	EPI_ISL_194308	A/Anhui/1-YK_RG61/2013		Import from public-domain	Das,S.R.; Halpin,R.A.; Lin,X.; Simenauer,A.; Akopov,A.; Fedorova,N.; Puri,V.; Stockwell,T.; Amedeo,P.; Bishop,B.; Katzel,D.; Schobel,S.; Shrivastava,S.; Neumann,G.; Bao,Y.; Sanders,R.; Zhdanov,S.; Kiryutin,B.; Lipman,D.J.; Tatusova,T.; Kawaoka,Y.
EPI637096	PB1	China	2013-Jan-01	EPI_ISL_194307	A/Anhui/1-YK_RG60/2013		Import from public-domain	Das,S.R.; Halpin,R.A.; Lin,X.; Simenauer,A.; Akopov,A.; Fedorova,N.; Puri,V.; Stockwell,T.; Amedeo,P.; Bishop,B.; Katzel,D.; Schobel,S.; Shrivastava,S.; Neumann,G.; Bao,Y.; Sanders,R.; Zhdanov,S.; Kiryutin,B.; Lipman,D.J.; Tatusova,T.; Kawaoka,Y.
EPI637089	PB1	China	2013-Jan-01	EPI_ISL_194306	A/Anhui/1-YK_RG59/2013		Import from public-domain	Das,S.R.; Halpin,R.A.; Lin,X.; Simenauer,A.; Akopov,A.; Fedorova,N.; Puri,V.; Stockwell,T.; Amedeo,P.; Bishop,B.; Katzel,D.; Schobel,S.; Shrivastava,S.; Neumann,G.; Bao,Y.; Sanders,R.; Zhdanov,S.; Kiryutin,B.; Lipman,D.J.; Tatusova,T.; Kawaoka,Y.
EPI637082	PB1	China	2013-Jan-01	EPI_ISL_194305	A/Anhui/1-YK_RG58/2013		Import from public-domain	Das,S.R.; Halpin,R.A.; Lin,X.; Simenauer,A.; Akopov,A.; Fedorova,N.; Puri,V.; Stockwell,T.; Amedeo,P.; Bishop,B.; Katzel,D.; Schobel,S.; Shrivastava,S.; Neumann,G.; Bao,Y.; Sanders,R.; Zhdanov,S.; Kiryutin,B.; Lipman,D.J.; Tatusova,T.; Kawaoka,Y.
EPI637075	PB1	China	2013-Jan-01	EPI_ISL_194304	A/Anhui/1-YK_RG57/2013		Import from public-domain	Das,S.R.; Halpin,R.A.; Lin,X.; Simenauer,A.; Akopov,A.; Fedorova,N.; Puri,V.; Stockwell,T.; Amedeo,P.; Bishop,B.; Katzel,D.; Schobel,S.; Shrivastava,S.; Neumann,G.; Bao,Y.; Sanders,R.; Zhdanov,S.; Kiryutin,B.; Lipman,D.J.; Tatusova,T.; Kawaoka,Y.
EPI637061	PB1	China	2013-Jan-01	EPI_ISL_194303	A/Anhui/1-YK_RG55/2013		Import from public-domain	Das,S.R.; Halpin,R.A.; Lin,X.; Simenauer,A.; Akopov,A.; Fedorova,N.; Puri,V.; Stockwell,T.; Amedeo,P.; Bishop,B.; Katzel,D.; Schobel,S.; Shrivastava,S.; Neumann,G.; Bao,Y.; Sanders,R.; Zhdanov,S.; Kiryutin,B.; Lipman,D.J.; Tatusova,T.; Kawaoka,Y.
EPI637005	PB1	China	2013-Jan-01	EPI_ISL_194302	A/Anhui/1-YK_RG47/2013		Import from public-domain	Das,S.R.; Halpin,R.A.; Lin,X.; Simenauer,A.; Akopov,A.; Fedorova,N.; Puri,V.; Stockwell,T.; Amedeo,P.; Bishop,B.; Katzel,D.; Schobel,S.; Shrivastava,S.; Neumann,G.; Bao,Y.; Sanders,R.; Zhdanov,S.; Kiryutin,B.; Lipman,D.J.; Tatusova,T.; Kawaoka,Y.
EPI637054	PB1	China	2013-Jan-01	EPI_ISL_194301	A/Anhui/1-YK_RG54/2013		Import from public-domain	Das,S.R.; Halpin,R.A.; Lin,X.; Simenauer,A.; Akopov,A.; Fedorova,N.; Puri,V.; Stockwell,T.; Amedeo,P.; Bishop,B.; Katzel,D.; Schobel,S.; Shrivastava,S.; Neumann,G.; Bao,Y.; Sanders,R.; Zhdanov,S.; Kiryutin,B.; Lipman,D.J.; Tatusova,T.; Kawaoka,Y.
EPI637047	PB1	China	2013-Jan-01	EPI_ISL_194300	A/Anhui/1-YK_RG53/2013		Import from public-domain	Das,S.R.; Halpin,R.A.; Lin,X.; Simenauer,A.; Akopov,A.; Fedorova,N.; Puri,V.; Stockwell,T.; Amedeo,P.; Bishop,B.; Katzel,D.; Schobel,S.; Shrivastava,S.; Neumann,G.; Bao,Y.; Sanders,R.; Zhdanov,S.; Kiryutin,B.; Lipman,D.J.; Tatusova,T.; Kawaoka,Y.
EPI637040	PB1	China	2013-Jan-01	EPI_ISL_194299	A/Anhui/1-YK_RG52/2013		Import from public-domain	Das,S.R.; Halpin,R.A.; Lin,X.; Simenauer,A.; Akopov,A.; Fedorova,N.; Puri,V.; Stockwell,T.; Amedeo,P.; Bishop,B.; Katzel,D.; Schobel,S.; Shrivastava,S.; Neumann,G.; Bao,Y.; Sanders,R.; Zhdanov,S.; Kiryutin,B.; Lipman,D.J.; Tatusova,T.; Kawaoka,Y.
EPI637033	PB1	China	2013-Jan-01	EPI_ISL_194298	A/Anhui/1-YK_RG51/2013		Import from public-domain	Das,S.R.; Halpin,R.A.; Lin,X.; Simenauer,A.; Akopov,A.; Fedorova,N.; Puri,V.; Stockwell,T.; Amedeo,P.; Bishop,B.; Katzel,D.; Schobel,S.; Shrivastava,S.; Neumann,G.; Bao,Y.; Sanders,R.; Zhdanov,S.; Kiryutin,B.; Lipman,D.J.; Tatusova,T.; Kawaoka,Y.
EPI637026	PB1	China	2013-Jan-01	EPI_ISL_194297	A/Anhui/1-YK_RG50/2013		Import from public-domain	Das,S.R.; Halpin,R.A.; Lin,X.; Simenauer,A.; Akopov,A.; Fedorova,N.; Puri,V.; Stockwell,T.; Amedeo,P.; Bishop,B.; Katzel,D.; Schobel,S.; Shrivastava,S.; Neumann,G.; Bao,Y.; Sanders,R.; Zhdanov,S.; Kiryutin,B.; Lipman,D.J.; Tatusova,T.; Kawaoka,Y.
EPI637019	PB1	China	2013-Jan-01	EPI_ISL_194296	A/Anhui/1-YK_RG49/2013		Import from public-domain	Das,S.R.; Halpin,R.A.; Lin,X.; Simenauer,A.; Akopov,A.; Fedorova,N.; Puri,V.; Stockwell,T.; Amedeo,P.; Bishop,B.; Katzel,D.; Schobel,S.; Shrivastava,S.; Neumann,G.; Bao,Y.; Sanders,R.; Zhdanov,S.; Kiryutin,B.; Lipman,D.J.; Tatusova,T.; Kawaoka,Y.
EPI637012	PB1	China	2013-Jan-01	EPI_ISL_194295	A/Anhui/1-YK_RG48/2013		Import from public-domain	Das,S.R.; Halpin,R.A.; Lin,X.; Simenauer,A.; Akopov,A.; Fedorova,N.; Puri,V.; Stockwell,T.; Amedeo,P.; Bishop,B.; Katzel,D.; Schobel,S.; Shrivastava,S.; Neumann,G.; Bao,Y.; Sanders,R.; Zhdanov,S.; Kiryutin,B.; Lipman,D.J.; Tatusova,T.; Kawaoka,Y.
EPI636998	PB1	China	2013-Jan-01	EPI_ISL_194294	A/Anhui/1-YK_RG46/2013		Import from public-domain	Das,S.R.; Halpin,R.A.; Lin,X.; Simenauer,A.; Akopov,A.; Fedorova,N.; Puri,V.; Stockwell,T.; Amedeo,P.; Bishop,B.; Katzel,D.; Schobel,S.; Shrivastava,S.; Neumann,G.; Bao,Y.; Sanders,R.; Zhdanov,S.; Kiryutin,B.; Lipman,D.J.; Tatusova,T.; Kawaoka,Y.
EPI636991	PB1	China	2013-Jan-01	EPI_ISL_194293	A/Anhui/1-YK_RG45/2013		Import from public-domain	Das,S.R.; Halpin,R.A.; Lin,X.; Simenauer,A.; Akopov,A.; Fedorova,N.; Puri,V.; Stockwell,T.; Amedeo,P.; Bishop,B.; Katzel,D.; Schobel,S.; Shrivastava,S.; Neumann,G.; Bao,Y.; Sanders,R.; Zhdanov,S.; Kiryutin,B.; Lipman,D.J.; Tatusova,T.; Kawaoka,Y.
EPI636935	PB1	China	2013-Jan-01	EPI_ISL_194292	A/Anhui/1-YK_RG37/2013		Import from public-domain	Das,S.R.; Halpin,R.A.; Lin,X.; Simenauer,A.; Akopov,A.; Fedorova,N.; Puri,V.; Stockwell,T.; Amedeo,P.; Bishop,B.; Katzel,D.; Schobel,S.; Shrivastava,S.; Neumann,G.; Bao,Y.; Sanders,R.; Zhdanov,S.; Kiryutin,B.; Lipman,D.J.; Tatusova,T.; Kawaoka,Y.
EPI636984	PB1	China	2013-Jan-01	EPI_ISL_194291	A/Anhui/1-YK_RG44/2013		Import from public-domain	Das,S.R.; Halpin,R.A.; Lin,X.; Simenauer,A.; Akopov,A.; Fedorova,N.; Puri,V.; Stockwell,T.; Amedeo,P.; Bishop,B.; Katzel,D.; Schobel,S.; Shrivastava,S.; Neumann,G.; Bao,Y.; Sanders,R.; Zhdanov,S.; Kiryutin,B.; Lipman,D.J.; Tatusova,T.; Kawaoka,Y.
EPI636977	PB1	China	2013-Jan-01	EPI_ISL_194290	A/Anhui/1-YK_RG43/2013		Import from public-domain	Das,S.R.; Halpin,R.A.; Lin,X.; Simenauer,A.; Akopov,A.; Fedorova,N.; Puri,V.; Stockwell,T.; Amedeo,P.; Bishop,B.; Katzel,D.; Schobel,S.; Shrivastava,S.; Neumann,G.; Bao,Y.; Sanders,R.; Zhdanov,S.; Kiryutin,B.; Lipman,D.J.; Tatusova,T.; Kawaoka,Y.
EPI636970	PB1	China	2013-Jan-01	EPI_ISL_194289	A/Anhui/1-YK_RG42/2013		Import from public-domain	Das,S.R.; Halpin,R.A.; Lin,X.; Simenauer,A.; Akopov,A.; Fedorova,N.; Puri,V.; Stockwell,T.; Amedeo,P.; Bishop,B.; Katzel,D.; Schobel,S.; Shrivastava,S.; Neumann,G.; Bao,Y.; Sanders,R.; Zhdanov,S.; Kiryutin,B.; Lipman,D.J.; Tatusova,T.; Kawaoka,Y.
EPI636963	PB1	China	2013-Jan-01	EPI_ISL_194288	A/Anhui/1-YK_RG41/2013		Import from public-domain	Das,S.R.; Halpin,R.A.; Lin,X.; Simenauer,A.; Akopov,A.; Fedorova,N.; Puri,V.; Stockwell,T.; Amedeo,P.; Bishop,B.; Katzel,D.; Schobel,S.; Shrivastava,S.; Neumann,G.; Bao,Y.; Sanders,R.; Zhdanov,S.; Kiryutin,B.; Lipman,D.J.; Tatusova,T.; Kawaoka,Y.
EPI636956	PB1	China	2013-Jan-01	EPI_ISL_194287	A/Anhui/1-YK_RG40/2013		Import from public-domain	Das,S.R.; Halpin,R.A.; Lin,X.; Simenauer,A.; Akopov,A.; Fedorova,N.; Puri,V.; Stockwell,T.; Amedeo,P.; Bishop,B.; Katzel,D.; Schobel,S.; Shrivastava,S.; Neumann,G.; Bao,Y.; Sanders,R.; Zhdanov,S.; Kiryutin,B.; Lipman,D.J.; Tatusova,T.; Kawaoka,Y.
EPI636949	PB1	China	2013-Jan-01	EPI_ISL_194286	A/Anhui/1-YK_RG39/2013		Import from public-domain	Das,S.R.; Halpin,R.A.; Lin,X.; Simenauer,A.; Akopov,A.; Fedorova,N.; Puri,V.; Stockwell,T.; Amedeo,P.; Bishop,B.; Katzel,D.; Schobel,S.; Shrivastava,S.; Neumann,G.; Bao,Y.; Sanders,R.; Zhdanov,S.; Kiryutin,B.; Lipman,D.J.; Tatusova,T.; Kawaoka,Y.
EPI636942	PB1	China	2013-Jan-01	EPI_ISL_194285	A/Anhui/1-YK_RG38/2013		Import from public-domain	Das,S.R.; Halpin,R.A.; Lin,X.; Simenauer,A.; Akopov,A.; Fedorova,N.; Puri,V.; Stockwell,T.; Amedeo,P.; Bishop,B.; Katzel,D.; Schobel,S.; Shrivastava,S.; Neumann,G.; Bao,Y.; Sanders,R.; Zhdanov,S.; Kiryutin,B.; Lipman,D.J.; Tatusova,T.; Kawaoka,Y.
EPI636919	PB1	China	2013-Jan-01	EPI_ISL_194284	A/Anhui/1-YK_RG35/2013		Import from public-domain	Das,S.R.; Halpin,R.A.; Lin,X.; Simenauer,A.; Akopov,A.; Fedorova,N.; Puri,V.; Stockwell,T.; Amedeo,P.; Bishop,B.; Katzel,D.; Schobel,S.; Shrivastava,S.; Neumann,G.; Bao,Y.; Sanders,R.; Zhdanov,S.; Kiryutin,B.; Lipman,D.J.; Tatusova,T.; Kawaoka,Y.
EPI636927	PB1	China	2013-Jan-01	EPI_ISL_194283	A/Anhui/1-YK_RG36/2013		Import from public-domain	Das,S.R.; Halpin,R.A.; Lin,X.; Simenauer,A.; Akopov,A.; Fedorova,N.; Puri,V.; Stockwell,T.; Amedeo,P.; Bishop,B.; Katzel,D.; Schobel,S.; Shrivastava,S.; Neumann,G.; Bao,Y.; Sanders,R.; Zhdanov,S.; Kiryutin,B.; Lipman,D.J.; Tatusova,T.; Kawaoka,Y.
EPI636912	PB1	China	2013-Jan-01	EPI_ISL_194282	A/Anhui/1-YK_RG34/2013		Import from public-domain	Das,S.R.; Halpin,R.A.; Lin,X.; Simenauer,A.; Akopov,A.; Fedorova,N.; Puri,V.; Stockwell,T.; Amedeo,P.; Bishop,B.; Katzel,D.; Schobel,S.; Shrivastava,S.; Neumann,G.; Bao,Y.; Sanders,R.; Zhdanov,S.; Kiryutin,B.; Lipman,D.J.; Tatusova,T.; Kawaoka,Y.
EPI636905	PB1	China	2013-Jan-01	EPI_ISL_194281	A/Anhui/1-YK_RG33/2013		Import from public-domain	Das,S.R.; Halpin,R.A.; Lin,X.; Simenauer,A.; Akopov,A.; Fedorova,N.; Puri,V.; Stockwell,T.; Amedeo,P.; Bishop,B.; Katzel,D.; Schobel,S.; Shrivastava,S.; Neumann,G.; Bao,Y.; Sanders,R.; Zhdanov,S.; Kiryutin,B.; Lipman,D.J.; Tatusova,T.; Kawaoka,Y.
EPI636898	PB1	China	2013-Jan-01	EPI_ISL_194280	A/Anhui/1-YK_RG32/2013		Import from public-domain	Das,S.R.; Halpin,R.A.; Lin,X.; Simenauer,A.; Akopov,A.; Fedorova,N.; Puri,V.; Stockwell,T.; Amedeo,P.; Bishop,B.; Katzel,D.; Schobel,S.; Shrivastava,S.; Neumann,G.; Bao,Y.; Sanders,R.; Zhdanov,S.; Kiryutin,B.; Lipman,D.J.; Tatusova,T.; Kawaoka,Y.
EPI636868	PB1	China	2013-Jan-01	EPI_ISL_194279	A/Anhui/1-YK_RG28/2013		Import from public-domain	Das,S.R.; Halpin,R.A.; Lin,X.; Simenauer,A.; Akopov,A.; Fedorova,N.; Puri,V.; Stockwell,T.; Amedeo,P.; Bishop,B.; Katzel,D.; Schobel,S.; Shrivastava,S.; Neumann,G.; Bao,Y.; Sanders,R.; Zhdanov,S.; Kiryutin,B.; Lipman,D.J.; Tatusova,T.; Kawaoka,Y.
EPI636890	PB1	China	2013-Jan-01	EPI_ISL_194278	A/Anhui/1-YK_RG31/2013		Import from public-domain	Das,S.R.; Halpin,R.A.; Lin,X.; Simenauer,A.; Akopov,A.; Fedorova,N.; Puri,V.; Stockwell,T.; Amedeo,P.; Bishop,B.; Katzel,D.; Schobel,S.; Shrivastava,S.; Neumann,G.; Bao,Y.; Sanders,R.; Zhdanov,S.; Kiryutin,B.; Lipman,D.J.; Tatusova,T.; Kawaoka,Y.
EPI636882	PB1	China	2013-Jan-01	EPI_ISL_194277	A/Anhui/1-YK_RG30/2013		Import from public-domain	Das,S.R.; Halpin,R.A.; Lin,X.; Simenauer,A.; Akopov,A.; Fedorova,N.; Puri,V.; Stockwell,T.; Amedeo,P.; Bishop,B.; Katzel,D.; Schobel,S.; Shrivastava,S.; Neumann,G.; Bao,Y.; Sanders,R.; Zhdanov,S.; Kiryutin,B.; Lipman,D.J.; Tatusova,T.; Kawaoka,Y.
EPI636875	PB1	China	2013-Jan-01	EPI_ISL_194276	A/Anhui/1-YK_RG29/2013		Import from public-domain	Das,S.R.; Halpin,R.A.; Lin,X.; Simenauer,A.; Akopov,A.; Fedorova,N.; Puri,V.; Stockwell,T.; Amedeo,P.; Bishop,B.; Katzel,D.; Schobel,S.; Shrivastava,S.; Neumann,G.; Bao,Y.; Sanders,R.; Zhdanov,S.; Kiryutin,B.; Lipman,D.J.; Tatusova,T.; Kawaoka,Y.
EPI636861	PB1	China	2013-Jan-01	EPI_ISL_194275	A/Anhui/1-YK_RG27/2013		Import from public-domain	Das,S.R.; Halpin,R.A.; Lin,X.; Simenauer,A.; Akopov,A.; Fedorova,N.; Puri,V.; Stockwell,T.; Amedeo,P.; Bishop,B.; Katzel,D.; Schobel,S.; Shrivastava,S.; Neumann,G.; Bao,Y.; Sanders,R.; Zhdanov,S.; Kiryutin,B.; Lipman,D.J.; Tatusova,T.; Kawaoka,Y.
EPI636854	PB1	China	2013-Jan-01	EPI_ISL_194274	A/Anhui/1-YK_RG26/2013		Import from public-domain	Das,S.R.; Halpin,R.A.; Lin,X.; Simenauer,A.; Akopov,A.; Fedorova,N.; Puri,V.; Stockwell,T.; Amedeo,P.; Bishop,B.; Katzel,D.; Schobel,S.; Shrivastava,S.; Neumann,G.; Bao,Y.; Sanders,R.; Zhdanov,S.; Kiryutin,B.; Lipman,D.J.; Tatusova,T.; Kawaoka,Y.
EPI636845	PB1	China	2013-Jan-01	EPI_ISL_194273	A/Anhui/1-YK_RG25/2013		Import from public-domain	Das,S.R.; Halpin,R.A.; Lin,X.; Simenauer,A.; Akopov,A.; Fedorova,N.; Puri,V.; Stockwell,T.; Amedeo,P.; Bishop,B.; Katzel,D.; Schobel,S.; Shrivastava,S.; Neumann,G.; Bao,Y.; Sanders,R.; Zhdanov,S.; Kiryutin,B.; Lipman,D.J.; Tatusova,T.; Kawaoka,Y.
EPI636802	PB1	China	2013-Jan-01	EPI_ISL_194272	A/Anhui/1-YK_RG19/2013		Import from public-domain	Das,S.R.; Halpin,R.A.; Lin,X.; Simenauer,A.; Akopov,A.; Fedorova,N.; Puri,V.; Stockwell,T.; Amedeo,P.; Bishop,B.; Katzel,D.; Schobel,S.; Shrivastava,S.; Neumann,G.; Bao,Y.; Sanders,R.; Zhdanov,S.; Kiryutin,B.; Lipman,D.J.; Tatusova,T.; Kawaoka,Y.
EPI636838	PB1	China	2013-Jan-01	EPI_ISL_194271	A/Anhui/1-YK_RG24/2013		Import from public-domain	Das,S.R.; Halpin,R.A.; Lin,X.; Simenauer,A.; Akopov,A.; Fedorova,N.; Puri,V.; Stockwell,T.; Amedeo,P.; Bishop,B.; Katzel,D.; Schobel,S.; Shrivastava,S.; Neumann,G.; Bao,Y.; Sanders,R.; Zhdanov,S.; Kiryutin,B.; Lipman,D.J.; Tatusova,T.; Kawaoka,Y.
EPI636831	PB1	China	2013-Jan-01	EPI_ISL_194270	A/Anhui/1-YK_RG23/2013		Import from public-domain	Das,S.R.; Halpin,R.A.; Lin,X.; Simenauer,A.; Akopov,A.; Fedorova,N.; Puri,V.; Stockwell,T.; Amedeo,P.; Bishop,B.; Katzel,D.; Schobel,S.; Shrivastava,S.; Neumann,G.; Bao,Y.; Sanders,R.; Zhdanov,S.; Kiryutin,B.; Lipman,D.J.; Tatusova,T.; Kawaoka,Y.
EPI636824	PB1	China	2013-Jan-01	EPI_ISL_194269	A/Anhui/1-YK_RG22/2013		Import from public-domain	Das,S.R.; Halpin,R.A.; Lin,X.; Simenauer,A.; Akopov,A.; Fedorova,N.; Puri,V.; Stockwell,T.; Amedeo,P.; Bishop,B.; Katzel,D.; Schobel,S.; Shrivastava,S.; Neumann,G.; Bao,Y.; Sanders,R.; Zhdanov,S.; Kiryutin,B.; Lipman,D.J.; Tatusova,T.; Kawaoka,Y.
EPI636817	PB1	China	2013-Jan-01	EPI_ISL_194268	A/Anhui/1-YK_RG21/2013		Import from public-domain	Das,S.R.; Halpin,R.A.; Lin,X.; Simenauer,A.; Akopov,A.; Fedorova,N.; Puri,V.; Stockwell,T.; Amedeo,P.; Bishop,B.; Katzel,D.; Schobel,S.; Shrivastava,S.; Neumann,G.; Bao,Y.; Sanders,R.; Zhdanov,S.; Kiryutin,B.; Lipman,D.J.; Tatusova,T.; Kawaoka,Y.
EPI636810	PB1	China	2013-Jan-01	EPI_ISL_194267	A/Anhui/1-YK_RG20/2013		Import from public-domain	Das,S.R.; Halpin,R.A.; Lin,X.; Simenauer,A.; Akopov,A.; Fedorova,N.; Puri,V.; Stockwell,T.; Amedeo,P.; Bishop,B.; Katzel,D.; Schobel,S.; Shrivastava,S.; Neumann,G.; Bao,Y.; Sanders,R.; Zhdanov,S.; Kiryutin,B.; Lipman,D.J.; Tatusova,T.; Kawaoka,Y.
EPI636792	PB1	China	2013-Jan-01	EPI_ISL_194266	A/Anhui/1-YK_RG18/2013		Import from public-domain	Das,S.R.; Halpin,R.A.; Lin,X.; Simenauer,A.; Akopov,A.; Fedorova,N.; Puri,V.; Stockwell,T.; Amedeo,P.; Bishop,B.; Katzel,D.; Schobel,S.; Shrivastava,S.; Neumann,G.; Bao,Y.; Sanders,R.; Zhdanov,S.; Kiryutin,B.; Lipman,D.J.; Tatusova,T.; Kawaoka,Y.
EPI636785	PB1	China	2013-Jan-01	EPI_ISL_194265	A/Anhui/1-YK_RG17/2013		Import from public-domain	Das,S.R.; Halpin,R.A.; Lin,X.; Simenauer,A.; Akopov,A.; Fedorova,N.; Puri,V.; Stockwell,T.; Amedeo,P.; Bishop,B.; Katzel,D.; Schobel,S.; Shrivastava,S.; Neumann,G.; Bao,Y.; Sanders,R.; Zhdanov,S.; Kiryutin,B.; Lipman,D.J.; Tatusova,T.; Kawaoka,Y.
EPI636778	PB1	China	2013-Jan-01	EPI_ISL_194264	A/Anhui/1-YK_RG16/2013		Import from public-domain	Das,S.R.; Halpin,R.A.; Lin,X.; Simenauer,A.; Akopov,A.; Fedorova,N.; Puri,V.; Stockwell,T.; Amedeo,P.; Bishop,B.; Katzel,D.; Schobel,S.; Shrivastava,S.; Neumann,G.; Bao,Y.; Sanders,R.; Zhdanov,S.; Kiryutin,B.; Lipman,D.J.; Tatusova,T.; Kawaoka,Y.
EPI636764	PB1	China	2013-Jan-01	EPI_ISL_194263	A/Anhui/1-YK_RG14/2013		Import from public-domain	Das,S.R.; Halpin,R.A.; Lin,X.; Simenauer,A.; Akopov,A.; Fedorova,N.; Puri,V.; Stockwell,T.; Amedeo,P.; Bishop,B.; Katzel,D.; Schobel,S.; Shrivastava,S.; Neumann,G.; Bao,Y.; Sanders,R.; Zhdanov,S.; Kiryutin,B.; Lipman,D.J.; Tatusova,T.; Kawaoka,Y.
EPI636771	PB1	China	2013-Jan-01	EPI_ISL_194262	A/Anhui/1-YK_RG15/2013		Import from public-domain	Das,S.R.; Halpin,R.A.; Lin,X.; Simenauer,A.; Akopov,A.; Fedorova,N.; Puri,V.; Stockwell,T.; Amedeo,P.; Bishop,B.; Katzel,D.; Schobel,S.; Shrivastava,S.; Neumann,G.; Bao,Y.; Sanders,R.; Zhdanov,S.; Kiryutin,B.; Lipman,D.J.; Tatusova,T.; Kawaoka,Y.
EPI636757	PB1	China	2013-Jan-01	EPI_ISL_194261	A/Anhui/1-YK_RG13/2013		Import from public-domain	Das,S.R.; Halpin,R.A.; Lin,X.; Simenauer,A.; Akopov,A.; Fedorova,N.; Puri,V.; Stockwell,T.; Amedeo,P.; Bishop,B.; Katzel,D.; Schobel,S.; Shrivastava,S.; Neumann,G.; Bao,Y.; Sanders,R.; Zhdanov,S.; Kiryutin,B.; Lipman,D.J.; Tatusova,T.; Kawaoka,Y.
EPI636743	PB1	China	2013-Jan-01	EPI_ISL_194260	A/Anhui/1-YK_RG10/2013		Import from public-domain	Das,S.R.; Halpin,R.A.; Lin,X.; Simenauer,A.; Akopov,A.; Fedorova,N.; Puri,V.; Stockwell,T.; Amedeo,P.; Bishop,B.; Katzel,D.; Schobel,S.; Shrivastava,S.; Neumann,G.; Bao,Y.; Sanders,R.; Zhdanov,S.; Kiryutin,B.; Lipman,D.J.; Tatusova,T.; Kawaoka,Y.
EPI636750	PB1	China	2013-Jan-01	EPI_ISL_194259	A/Anhui/1-YK_RG12/2013		Import from public-domain	Das,S.R.; Halpin,R.A.; Lin,X.; Simenauer,A.; Akopov,A.; Fedorova,N.; Puri,V.; Stockwell,T.; Amedeo,P.; Bishop,B.; Katzel,D.; Schobel,S.; Shrivastava,S.; Neumann,G.; Bao,Y.; Sanders,R.; Zhdanov,S.; Kiryutin,B.; Lipman,D.J.; Tatusova,T.; Kawaoka,Y.
EPI636727	PB1	China	2013-Jan-01	EPI_ISL_194258	A/Anhui/1-YK_RG08/2013		Import from public-domain	Das,S.R.; Halpin,R.A.; Lin,X.; Simenauer,A.; Akopov,A.; Fedorova,N.; Puri,V.; Stockwell,T.; Amedeo,P.; Bishop,B.; Katzel,D.; Schobel,S.; Shrivastava,S.; Neumann,G.; Bao,Y.; Sanders,R.; Zhdanov,S.; Kiryutin,B.; Lipman,D.J.; Tatusova,T.; Kawaoka,Y.
EPI636735	PB1	China	2013-Jan-01	EPI_ISL_194257	A/Anhui/1-YK_RG09/2013		Import from public-domain	Das,S.R.; Halpin,R.A.; Lin,X.; Simenauer,A.; Akopov,A.; Fedorova,N.; Puri,V.; Stockwell,T.; Amedeo,P.; Bishop,B.; Katzel,D.; Schobel,S.; Shrivastava,S.; Neumann,G.; Bao,Y.; Sanders,R.; Zhdanov,S.; Kiryutin,B.; Lipman,D.J.; Tatusova,T.; Kawaoka,Y.
EPI636706	PB1	China	2013-Jan-01	EPI_ISL_194256	A/Anhui/1-YK_RG05/2013		Import from public-domain	Das,S.R.; Halpin,R.A.; Lin,X.; Simenauer,A.; Akopov,A.; Fedorova,N.; Puri,V.; Stockwell,T.; Amedeo,P.; Bishop,B.; Katzel,D.; Schobel,S.; Shrivastava,S.; Neumann,G.; Bao,Y.; Sanders,R.; Zhdanov,S.; Kiryutin,B.; Lipman,D.J.; Tatusova,T.; Kawaoka,Y.
EPI636720	PB1	China	2013-Jan-01	EPI_ISL_194255	A/Anhui/1-YK_RG07/2013		Import from public-domain	Das,S.R.; Halpin,R.A.; Lin,X.; Simenauer,A.; Akopov,A.; Fedorova,N.; Puri,V.; Stockwell,T.; Amedeo,P.; Bishop,B.; Katzel,D.; Schobel,S.; Shrivastava,S.; Neumann,G.; Bao,Y.; Sanders,R.; Zhdanov,S.; Kiryutin,B.; Lipman,D.J.; Tatusova,T.; Kawaoka,Y.
EPI636713	PB1	China	2013-Jan-01	EPI_ISL_194254	A/Anhui/1-YK_RG06/2013		Import from public-domain	Das,S.R.; Halpin,R.A.; Lin,X.; Simenauer,A.; Akopov,A.; Fedorova,N.; Puri,V.; Stockwell,T.; Amedeo,P.; Bishop,B.; Katzel,D.; Schobel,S.; Shrivastava,S.; Neumann,G.; Bao,Y.; Sanders,R.; Zhdanov,S.; Kiryutin,B.; Lipman,D.J.; Tatusova,T.; Kawaoka,Y.
EPI636699	PB1	China	2013-Jan-01	EPI_ISL_194253	A/Anhui/1-YK_RG04/2013		Import from public-domain	Das,S.R.; Halpin,R.A.; Lin,X.; Simenauer,A.; Akopov,A.; Fedorova,N.; Puri,V.; Stockwell,T.; Amedeo,P.; Bishop,B.; Katzel,D.; Schobel,S.; Shrivastava,S.; Neumann,G.; Bao,Y.; Sanders,R.; Zhdanov,S.; Kiryutin,B.; Lipman,D.J.; Tatusova,T.; Kawaoka,Y.
EPI636685	PB1	China	2013-Jan-01	EPI_ISL_194252	A/Anhui/1-YK_RG02/2013		Import from public-domain	Das,S.R.; Halpin,R.A.; Lin,X.; Simenauer,A.; Akopov,A.; Fedorova,N.; Puri,V.; Stockwell,T.; Amedeo,P.; Bishop,B.; Katzel,D.; Schobel,S.; Shrivastava,S.; Neumann,G.; Bao,Y.; Sanders,R.; Zhdanov,S.; Kiryutin,B.; Lipman,D.J.; Tatusova,T.; Kawaoka,Y.
EPI636692	PB1	China	2013-Jan-01	EPI_ISL_194251	A/Anhui/1-YK_RG03/2013		Import from public-domain	Das,S.R.; Halpin,R.A.; Lin,X.; Simenauer,A.; Akopov,A.; Fedorova,N.; Puri,V.; Stockwell,T.; Amedeo,P.; Bishop,B.; Katzel,D.; Schobel,S.; Shrivastava,S.; Neumann,G.; Bao,Y.; Sanders,R.; Zhdanov,S.; Kiryutin,B.; Lipman,D.J.; Tatusova,T.; Kawaoka,Y.
EPI636678	PB1	China	2013-Jan-01	EPI_ISL_194250	A/Anhui/1-YK_RG01/2013		Import from public-domain	Das,S.R.; Halpin,R.A.; Lin,X.; Simenauer,A.; Akopov,A.; Fedorova,N.; Puri,V.; Stockwell,T.; Amedeo,P.; Bishop,B.; Katzel,D.; Schobel,S.; Shrivastava,S.; Neumann,G.; Bao,Y.; Sanders,R.; Zhdanov,S.; Kiryutin,B.; Lipman,D.J.; Tatusova,T.; Kawaoka,Y.
EPI628830	PB1	China	2015-Feb-25	EPI_ISL_192505	A/Zhejiang/9/2015	WHO Chinese National Influenza Center	WHO Chinese National Influenza Center	Wang,Dayan;Gao,Rongbao;Yang,Lei;Zhou,Shumei;Li,Xiyan;Zhou,Jianfang;Zhu,Wenfei;Guo,Junfeng;Li,Xiaodan;Dong,Jie;Huang,Weijuan;Zhang,Ye;Dong,Libo;Zhao,Xiang;Lu,Jian;Lan,Yu;Shu,Yuelong
EPI628822	PB1	China	2015-Feb-12	EPI_ISL_192504	A/Zhejiang/10/2015	WHO Chinese National Influenza Center	WHO Chinese National Influenza Center	Wang,Dayan;Gao,Rongbao;Yang,Lei;Zhou,Shumei;Li,Xiyan;Zhou,Jianfang;Zhu,Wenfei;Guo,Junfeng;Li,Xiaodan;Dong,Jie;Huang,Weijuan;Zhang,Ye;Dong,Libo;Zhao,Xiang;Lu,Jian;Lan,Yu;Shu,Yuelong
EPI628814	PB1	China	2015-Mar-03	EPI_ISL_192503	A/Zhejiang/11/2015	WHO Chinese National Influenza Center	WHO Chinese National Influenza Center	Wang,Dayan;Gao,Rongbao;Yang,Lei;Zhou,Shumei;Li,Xiyan;Zhou,Jianfang;Zhu,Wenfei;Guo,Junfeng;Li,Xiaodan;Dong,Jie;Huang,Weijuan;Zhang,Ye;Dong,Libo;Zhao,Xiang;Lu,Jian;Lan,Yu;Shu,Yuelong
EPI628806	PB1	China	2015-Feb-02	EPI_ISL_192502	A/Fujian/27/2015	WHO Chinese National Influenza Center	WHO Chinese National Influenza Center	Wang,Dayan;Gao,Rongbao;Yang,Lei;Zhou,Shumei;Li,Xiyan;Zhou,Jianfang;Zhu,Wenfei;Guo,Junfeng;Li,Xiaodan;Dong,Jie;Huang,Weijuan;Zhang,Ye;Dong,Libo;Zhao,Xiang;Lu,Jian;Lan,Yu;Shu,Yuelong
EPI628798	PB1	China	2015-Mar-15	EPI_ISL_192501	A/Fujian/28/2015	WHO Chinese National Influenza Center	WHO Chinese National Influenza Center	Wang,Dayan;Gao,Rongbao;Yang,Lei;Zhou,Shumei;Li,Xiyan;Zhou,Jianfang;Zhu,Wenfei;Guo,Junfeng;Li,Xiaodan;Dong,Jie;Huang,Weijuan;Zhang,Ye;Dong,Libo;Zhao,Xiang;Lu,Jian;Lan,Yu;Shu,Yuelong
EPI628782	PB1	China	2015-Mar-07	EPI_ISL_192499	A/Shandong-Taian/01/2015	WHO Chinese National Influenza Center	WHO Chinese National Influenza Center	Wang,Dayan;Gao,Rongbao;Yang,Lei;Zhou,Shumei;Li,Xiyan;Zhou,Jianfang;Zhu,Wenfei;Guo,Junfeng;Li,Xiaodan;Dong,Jie;Huang,Weijuan;Zhang,Ye;Dong,Libo;Zhao,Xiang;Lu,Jian;Lan,Yu;Shu,Yuelong
EPI628774	PB1	China	2015-Feb-04	EPI_ISL_192498	A/Zhejiang/7/2015	WHO Chinese National Influenza Center	WHO Chinese National Influenza Center	Wang,Dayan;Gao,Rongbao;Yang,Lei;Zhou,Shumei;Li,Xiyan;Zhou,Jianfang;Zhu,Wenfei;Guo,Junfeng;Li,Xiaodan;Dong,Jie;Huang,Weijuan;Zhang,Ye;Dong,Libo;Zhao,Xiang;Lu,Jian;Lan,Yu;Shu,Yuelong
EPI628766	PB1	China	2015-Feb-02	EPI_ISL_192497	A/Zhejiang/8/2015	WHO Chinese National Influenza Center	WHO Chinese National Influenza Center	Wang,Dayan;Gao,Rongbao;Yang,Lei;Zhou,Shumei;Li,Xiyan;Zhou,Jianfang;Zhu,Wenfei;Guo,Junfeng;Li,Xiaodan;Dong,Jie;Huang,Weijuan;Zhang,Ye;Dong,Libo;Zhao,Xiang;Lu,Jian;Lan,Yu;Shu,Yuelong
EPI628750	PB1	China	2015-Feb-26	EPI_ISL_192495	A/Anhui/33225/2015	WHO Chinese National Influenza Center	WHO Chinese National Influenza Center	Wang,Dayan;Gao,Rongbao;Yang,Lei;Zhou,Shumei;Li,Xiyan;Zhou,Jianfang;Zhu,Wenfei;Guo,Junfeng;Li,Xiaodan;Dong,Jie;Huang,Weijuan;Zhang,Ye;Dong,Libo;Zhao,Xiang;Lu,Jian;Lan,Yu;Shu,Yuelong
EPI628742	PB1	China	2015-Mar-05	EPI_ISL_192494	A/Anhui/33224/2015	WHO Chinese National Influenza Center	WHO Chinese National Influenza Center	Wang,Dayan;Gao,Rongbao;Yang,Lei;Zhou,Shumei;Li,Xiyan;Zhou,Jianfang;Zhu,Wenfei;Guo,Junfeng;Li,Xiaodan;Dong,Jie;Huang,Weijuan;Zhang,Ye;Dong,Libo;Zhao,Xiang;Lu,Jian;Lan,Yu;Shu,Yuelong
EPI628734	PB1	China	2015-Mar-02	EPI_ISL_192493	A/Anhui/33223/2015	WHO Chinese National Influenza Center	WHO Chinese National Influenza Center	Wang,Dayan;Gao,Rongbao;Yang,Lei;Zhou,Shumei;Li,Xiyan;Zhou,Jianfang;Zhu,Wenfei;Guo,Junfeng;Li,Xiaodan;Dong,Jie;Huang,Weijuan;Zhang,Ye;Dong,Libo;Zhao,Xiang;Lu,Jian;Lan,Yu;Shu,Yuelong
EPI628726	PB1	China	2015-Apr-08	EPI_ISL_192492	A/Anhui/33228/2015	WHO Chinese National Influenza Center	WHO Chinese National Influenza Center	Wang,Dayan;Gao,Rongbao;Yang,Lei;Zhou,Shumei;Li,Xiyan;Zhou,Jianfang;Zhu,Wenfei;Guo,Junfeng;Li,Xiaodan;Dong,Jie;Huang,Weijuan;Zhang,Ye;Dong,Libo;Zhao,Xiang;Lu,Jian;Lan,Yu;Shu,Yuelong
EPI628694	PB1	China	2015-Jan-25	EPI_ISL_192488	A/Guangdong/15SF055/2015	WHO Chinese National Influenza Center	WHO Chinese National Influenza Center	Wang,Dayan;Gao,Rongbao;Yang,Lei;Zhou,Shumei;Li,Xiyan;Zhou,Jianfang;Zhu,Wenfei;Guo,Junfeng;Li,Xiaodan;Dong,Jie;Huang,Weijuan;Zhang,Ye;Dong,Libo;Zhao,Xiang;Lu,Jian;Lan,Yu;Shu,Yuelong
EPI628686	PB1	China	2015-Jan-22	EPI_ISL_192487	A/Guangdong/15SF054/2015	WHO Chinese National Influenza Center	WHO Chinese National Influenza Center	Wang,Dayan;Gao,Rongbao;Yang,Lei;Zhou,Shumei;Li,Xiyan;Zhou,Jianfang;Zhu,Wenfei;Guo,Junfeng;Li,Xiaodan;Dong,Jie;Huang,Weijuan;Zhang,Ye;Dong,Libo;Zhao,Xiang;Lu,Jian;Lan,Yu;Shu,Yuelong
EPI628662	PB1	China	2015-Feb-23	EPI_ISL_192484	A/Anhui/33227/2015	WHO Chinese National Influenza Center	WHO Chinese National Influenza Center	Wang,Dayan;Gao,Rongbao;Yang,Lei;Zhou,Shumei;Li,Xiyan;Zhou,Jianfang;Zhu,Wenfei;Guo,Junfeng;Li,Xiaodan;Dong,Jie;Huang,Weijuan;Zhang,Ye;Dong,Libo;Zhao,Xiang;Lu,Jian;Lan,Yu;Shu,Yuelong
EPI628614	PB1	China	2015-Apr-22	EPI_ISL_192478	A/Hubei/34007/2015	WHO Chinese National Influenza Center	WHO Chinese National Influenza Center	Wang,Dayan;Gao,Rongbao;Yang,Lei;Zhou,Shumei;Li,Xiyan;Zhou,Jianfang;Zhu,Wenfei;Guo,Junfeng;Li,Xiaodan;Dong,Jie;Huang,Weijuan;Zhang,Ye;Dong,Libo;Zhao,Xiang;Lu,Jian;Lan,Yu;Shu,Yuelong
EPI628566	PB1	China	2015-May-23	EPI_ISL_192472	A/Anhui/40095/2015	WHO Chinese National Influenza Center	WHO Chinese National Influenza Center	Wang,Dayan;Gao,Rongbao;Yang,Lei;Zhou,Shumei;Li,Xiyan;Zhou,Jianfang;Zhu,Wenfei;Guo,Junfeng;Li,Xiaodan;Dong,Jie;Huang,Weijuan;Zhang,Ye;Dong,Libo;Zhao,Xiang;Lu,Jian;Lan,Yu;Shu,Yuelong
EPI628558	PB1	China	2015-May-23	EPI_ISL_192471	A/Anhui/40094/2015	WHO Chinese National Influenza Center	WHO Chinese National Influenza Center	Wang,Dayan;Gao,Rongbao;Yang,Lei;Zhou,Shumei;Li,Xiyan;Zhou,Jianfang;Zhu,Wenfei;Guo,Junfeng;Li,Xiaodan;Dong,Jie;Huang,Weijuan;Zhang,Ye;Dong,Libo;Zhao,Xiang;Lu,Jian;Lan,Yu;Shu,Yuelong
EPI628542	PB1	China	2015-May-26	EPI_ISL_192469	A/Beijing/40610/2015	WHO Chinese National Influenza Center	WHO Chinese National Influenza Center	Wang,Dayan;Gao,Rongbao;Yang,Lei;Zhou,Shumei;Li,Xiyan;Zhou,Jianfang;Zhu,Wenfei;Guo,Junfeng;Li,Xiaodan;Dong,Jie;Huang,Weijuan;Zhang,Ye;Dong,Libo;Zhao,Xiang;Lu,Jian;Lan,Yu;Shu,Yuelong
EPI628518	PB1	China	2013-Nov-30	EPI_ISL_192466	A/Guangdong/24997/2013	WHO Chinese National Influenza Center	WHO Chinese National Influenza Center	Wang,Dayan;Gao,Rongbao;Yang,Lei;Zhou,Shumei;Li,Xiyan;Zhou,Jianfang;Zhu,Wenfei;Guo,Junfeng;Li,Xiaodan;Dong,Jie;Huang,Weijuan;Zhang,Ye;Dong,Libo;Zhao,Xiang;Lu,Jian;Lan,Yu;Shu,Yuelong
EPI628510	PB1	China	2013-Dec-16	EPI_ISL_192465	A/Guangdong/24999/2013	WHO Chinese National Influenza Center	WHO Chinese National Influenza Center	Wang,Dayan;Gao,Rongbao;Yang,Lei;Zhou,Shumei;Li,Xiyan;Zhou,Jianfang;Zhu,Wenfei;Guo,Junfeng;Li,Xiaodan;Dong,Jie;Huang,Weijuan;Zhang,Ye;Dong,Libo;Zhao,Xiang;Lu,Jian;Lan,Yu;Shu,Yuelong
EPI628502	PB1	China	2014-Jan-08	EPI_ISL_192464	A/Guangdong/02620/2014	WHO Chinese National Influenza Center	WHO Chinese National Influenza Center	Wang,Dayan;Gao,Rongbao;Yang,Lei;Zhou,Shumei;Li,Xiyan;Zhou,Jianfang;Zhu,Wenfei;Guo,Junfeng;Li,Xiaodan;Dong,Jie;Huang,Weijuan;Zhang,Ye;Dong,Libo;Zhao,Xiang;Lu,Jian;Lan,Yu;Shu,Yuelong
EPI628494	PB1	China	2014-Jan-04	EPI_ISL_192463	A/Guangdong/02124/2014	WHO Chinese National Influenza Center	WHO Chinese National Influenza Center	Wang,Dayan;Gao,Rongbao;Yang,Lei;Zhou,Shumei;Li,Xiyan;Zhou,Jianfang;Zhu,Wenfei;Guo,Junfeng;Li,Xiaodan;Dong,Jie;Huang,Weijuan;Zhang,Ye;Dong,Libo;Zhao,Xiang;Lu,Jian;Lan,Yu;Shu,Yuelong
EPI628486	PB1	China	2014-Jan-08	EPI_ISL_192462	A/Guangdong/02125/2014	WHO Chinese National Influenza Center	WHO Chinese National Influenza Center	Wang,Dayan;Gao,Rongbao;Yang,Lei;Zhou,Shumei;Li,Xiyan;Zhou,Jianfang;Zhu,Wenfei;Guo,Junfeng;Li,Xiaodan;Dong,Jie;Huang,Weijuan;Zhang,Ye;Dong,Libo;Zhao,Xiang;Lu,Jian;Lan,Yu;Shu,Yuelong
EPI628478	PB1	China	2014-Jan-13	EPI_ISL_192461	A/Guangdong/033/2014	WHO Chinese National Influenza Center	WHO Chinese National Influenza Center	Wang,Dayan;Gao,Rongbao;Yang,Lei;Zhou,Shumei;Li,Xiyan;Zhou,Jianfang;Zhu,Wenfei;Guo,Junfeng;Li,Xiaodan;Dong,Jie;Huang,Weijuan;Zhang,Ye;Dong,Libo;Zhao,Xiang;Lu,Jian;Lan,Yu;Shu,Yuelong
EPI628470	PB1	China	2014-Jan-13	EPI_ISL_192460	A/Guangdong/035/2014	WHO Chinese National Influenza Center	WHO Chinese National Influenza Center	Wang,Dayan;Gao,Rongbao;Yang,Lei;Zhou,Shumei;Li,Xiyan;Zhou,Jianfang;Zhu,Wenfei;Guo,Junfeng;Li,Xiaodan;Dong,Jie;Huang,Weijuan;Zhang,Ye;Dong,Libo;Zhao,Xiang;Lu,Jian;Lan,Yu;Shu,Yuelong
EPI628462	PB1	China	2014-Jan-13	EPI_ISL_192459	A/Guangdong/036/2014	WHO Chinese National Influenza Center	WHO Chinese National Influenza Center	Wang,Dayan;Gao,Rongbao;Yang,Lei;Zhou,Shumei;Li,Xiyan;Zhou,Jianfang;Zhu,Wenfei;Guo,Junfeng;Li,Xiaodan;Dong,Jie;Huang,Weijuan;Zhang,Ye;Dong,Libo;Zhao,Xiang;Lu,Jian;Lan,Yu;Shu,Yuelong
EPI628454	PB1	China	2014-Jan-13	EPI_ISL_192458	A/Guangdong/034/2014	WHO Chinese National Influenza Center	WHO Chinese National Influenza Center	Wang,Dayan;Gao,Rongbao;Yang,Lei;Zhou,Shumei;Li,Xiyan;Zhou,Jianfang;Zhu,Wenfei;Guo,Junfeng;Li,Xiaodan;Dong,Jie;Huang,Weijuan;Zhang,Ye;Dong,Libo;Zhao,Xiang;Lu,Jian;Lan,Yu;Shu,Yuelong
EPI628430	PB1	China	2014-Jan-03	EPI_ISL_192455	A/Shanghai/02619/2014	WHO Chinese National Influenza Center	WHO Chinese National Influenza Center	Wang,Dayan;Gao,Rongbao;Yang,Lei;Zhou,Shumei;Li,Xiyan;Zhou,Jianfang;Zhu,Wenfei;Guo,Junfeng;Li,Xiaodan;Dong,Jie;Huang,Weijuan;Zhang,Ye;Dong,Libo;Zhao,Xiang;Lu,Jian;Lan,Yu;Shu,Yuelong
EPI628422	PB1	China	2014-Jan-14	EPI_ISL_192454	A/Guangdong/037/2014	WHO Chinese National Influenza Center	WHO Chinese National Influenza Center	Wang,Dayan;Gao,Rongbao;Yang,Lei;Zhou,Shumei;Li,Xiyan;Zhou,Jianfang;Zhu,Wenfei;Guo,Junfeng;Li,Xiaodan;Dong,Jie;Huang,Weijuan;Zhang,Ye;Dong,Libo;Zhao,Xiang;Lu,Jian;Lan,Yu;Shu,Yuelong
EPI628398	PB1	China	2014-Jan-14	EPI_ISL_192451	A/Fujian/1/2014	WHO Chinese National Influenza Center	WHO Chinese National Influenza Center	Wang,Dayan;Gao,Rongbao;Yang,Lei;Zhou,Shumei;Li,Xiyan;Zhou,Jianfang;Zhu,Wenfei;Guo,Junfeng;Li,Xiaodan;Dong,Jie;Huang,Weijuan;Zhang,Ye;Dong,Libo;Zhao,Xiang;Lu,Jian;Lan,Yu;Shu,Yuelong
EPI628390	PB1	China	2014-Jan-15	EPI_ISL_192450	A/Fujian/2/2014	WHO Chinese National Influenza Center	WHO Chinese National Influenza Center	Wang,Dayan;Gao,Rongbao;Yang,Lei;Zhou,Shumei;Li,Xiyan;Zhou,Jianfang;Zhu,Wenfei;Guo,Junfeng;Li,Xiaodan;Dong,Jie;Huang,Weijuan;Zhang,Ye;Dong,Libo;Zhao,Xiang;Lu,Jian;Lan,Yu;Shu,Yuelong
EPI628382	PB1	China	2014-Jan-03	EPI_ISL_192449	A/Zhejiang/1/2014	WHO Chinese National Influenza Center	WHO Chinese National Influenza Center	Wang,Dayan;Gao,Rongbao;Yang,Lei;Zhou,Shumei;Li,Xiyan;Zhou,Jianfang;Zhu,Wenfei;Guo,Junfeng;Li,Xiaodan;Dong,Jie;Huang,Weijuan;Zhang,Ye;Dong,Libo;Zhao,Xiang;Lu,Jian;Lan,Yu;Shu,Yuelong
EPI628374	PB1	China	2014-Jan-09	EPI_ISL_192448	A/Zhejiang/2/2014	WHO Chinese National Influenza Center	WHO Chinese National Influenza Center	Wang,Dayan;Gao,Rongbao;Yang,Lei;Zhou,Shumei;Li,Xiyan;Zhou,Jianfang;Zhu,Wenfei;Guo,Junfeng;Li,Xiaodan;Dong,Jie;Huang,Weijuan;Zhang,Ye;Dong,Libo;Zhao,Xiang;Lu,Jian;Lan,Yu;Shu,Yuelong
EPI628366	PB1	China	2014-Jan-09	EPI_ISL_192447	A/Zhejiang/3/2014	WHO Chinese National Influenza Center	WHO Chinese National Influenza Center	Wang,Dayan;Gao,Rongbao;Yang,Lei;Zhou,Shumei;Li,Xiyan;Zhou,Jianfang;Zhu,Wenfei;Guo,Junfeng;Li,Xiaodan;Dong,Jie;Huang,Weijuan;Zhang,Ye;Dong,Libo;Zhao,Xiang;Lu,Jian;Lan,Yu;Shu,Yuelong
EPI628358	PB1	China	2014-Jan-11	EPI_ISL_192446	A/Zhejiang/4/2014	WHO Chinese National Influenza Center	WHO Chinese National Influenza Center	Wang,Dayan;Gao,Rongbao;Yang,Lei;Zhou,Shumei;Li,Xiyan;Zhou,Jianfang;Zhu,Wenfei;Guo,Junfeng;Li,Xiaodan;Dong,Jie;Huang,Weijuan;Zhang,Ye;Dong,Libo;Zhao,Xiang;Lu,Jian;Lan,Yu;Shu,Yuelong
EPI628350	PB1	China	2014-Jan-08	EPI_ISL_192445	A/Zhejiang/5/2014	WHO Chinese National Influenza Center	WHO Chinese National Influenza Center	Wang,Dayan;Gao,Rongbao;Yang,Lei;Zhou,Shumei;Li,Xiyan;Zhou,Jianfang;Zhu,Wenfei;Guo,Junfeng;Li,Xiaodan;Dong,Jie;Huang,Weijuan;Zhang,Ye;Dong,Libo;Zhao,Xiang;Lu,Jian;Lan,Yu;Shu,Yuelong
EPI628342	PB1	China	2014-Jan-15	EPI_ISL_192444	A/Zhejiang/6/2014	WHO Chinese National Influenza Center	WHO Chinese National Influenza Center	Wang,Dayan;Gao,Rongbao;Yang,Lei;Zhou,Shumei;Li,Xiyan;Zhou,Jianfang;Zhu,Wenfei;Guo,Junfeng;Li,Xiaodan;Dong,Jie;Huang,Weijuan;Zhang,Ye;Dong,Libo;Zhao,Xiang;Lu,Jian;Lan,Yu;Shu,Yuelong
EPI628334	PB1	China	2014-Jan-23	EPI_ISL_192443	A/Zhejiang/07800/2014	WHO Chinese National Influenza Center	WHO Chinese National Influenza Center	Wang,Dayan;Gao,Rongbao;Yang,Lei;Zhou,Shumei;Li,Xiyan;Zhou,Jianfang;Zhu,Wenfei;Guo,Junfeng;Li,Xiaodan;Dong,Jie;Huang,Weijuan;Zhang,Ye;Dong,Libo;Zhao,Xiang;Lu,Jian;Lan,Yu;Shu,Yuelong
EPI628326	PB1	China	2014-Jan-23	EPI_ISL_192442	A/Zhejiang/07801/2014	WHO Chinese National Influenza Center	WHO Chinese National Influenza Center	Wang,Dayan;Gao,Rongbao;Yang,Lei;Zhou,Shumei;Li,Xiyan;Zhou,Jianfang;Zhu,Wenfei;Guo,Junfeng;Li,Xiaodan;Dong,Jie;Huang,Weijuan;Zhang,Ye;Dong,Libo;Zhao,Xiang;Lu,Jian;Lan,Yu;Shu,Yuelong
EPI628318	PB1	China	2014-Jan-20	EPI_ISL_192441	A/Zhejiang/07802/2014	WHO Chinese National Influenza Center	WHO Chinese National Influenza Center	Wang,Dayan;Gao,Rongbao;Yang,Lei;Zhou,Shumei;Li,Xiyan;Zhou,Jianfang;Zhu,Wenfei;Guo,Junfeng;Li,Xiaodan;Dong,Jie;Huang,Weijuan;Zhang,Ye;Dong,Libo;Zhao,Xiang;Lu,Jian;Lan,Yu;Shu,Yuelong
EPI628310	PB1	China	2014-Jan-23	EPI_ISL_192440	A/Zhejiang/07803/2014	WHO Chinese National Influenza Center	WHO Chinese National Influenza Center	Wang,Dayan;Gao,Rongbao;Yang,Lei;Zhou,Shumei;Li,Xiyan;Zhou,Jianfang;Zhu,Wenfei;Guo,Junfeng;Li,Xiaodan;Dong,Jie;Huang,Weijuan;Zhang,Ye;Dong,Libo;Zhao,Xiang;Lu,Jian;Lan,Yu;Shu,Yuelong
EPI628302	PB1	China	2014-Jan-19	EPI_ISL_192439	A/Zhejiang/07807/2014	WHO Chinese National Influenza Center	WHO Chinese National Influenza Center	Wang,Dayan;Gao,Rongbao;Yang,Lei;Zhou,Shumei;Li,Xiyan;Zhou,Jianfang;Zhu,Wenfei;Guo,Junfeng;Li,Xiaodan;Dong,Jie;Huang,Weijuan;Zhang,Ye;Dong,Libo;Zhao,Xiang;Lu,Jian;Lan,Yu;Shu,Yuelong
EPI628294	PB1	China	2014-Feb-02	EPI_ISL_192438	A/Hunan/08963/2014	WHO Chinese National Influenza Center	WHO Chinese National Influenza Center	Wang,Dayan;Gao,Rongbao;Yang,Lei;Zhou,Shumei;Li,Xiyan;Zhou,Jianfang;Zhu,Wenfei;Guo,Junfeng;Li,Xiaodan;Dong,Jie;Huang,Weijuan;Zhang,Ye;Dong,Libo;Zhao,Xiang;Lu,Jian;Lan,Yu;Shu,Yuelong
EPI628278	PB1	China	2014-Jan-27	EPI_ISL_192436	A/Hunan/07833/2014	WHO Chinese National Influenza Center	WHO Chinese National Influenza Center	Wang,Dayan;Gao,Rongbao;Yang,Lei;Zhou,Shumei;Li,Xiyan;Zhou,Jianfang;Zhu,Wenfei;Guo,Junfeng;Li,Xiaodan;Dong,Jie;Huang,Weijuan;Zhang,Ye;Dong,Libo;Zhao,Xiang;Lu,Jian;Lan,Yu;Shu,Yuelong
EPI628270	PB1	China	2014-Jan-16	EPI_ISL_192435	A/Fujian/3/2014	WHO Chinese National Influenza Center	WHO Chinese National Influenza Center	Wang,Dayan;Gao,Rongbao;Yang,Lei;Zhou,Shumei;Li,Xiyan;Zhou,Jianfang;Zhu,Wenfei;Guo,Junfeng;Li,Xiaodan;Dong,Jie;Huang,Weijuan;Zhang,Ye;Dong,Libo;Zhao,Xiang;Lu,Jian;Lan,Yu;Shu,Yuelong
EPI628246	PB1	China	2014-Jan-20	EPI_ISL_192432	A/Jiangsu/09041/2014	WHO Chinese National Influenza Center	WHO Chinese National Influenza Center	Wang,Dayan;Gao,Rongbao;Yang,Lei;Zhou,Shumei;Li,Xiyan;Zhou,Jianfang;Zhu,Wenfei;Guo,Junfeng;Li,Xiaodan;Dong,Jie;Huang,Weijuan;Zhang,Ye;Dong,Libo;Zhao,Xiang;Lu,Jian;Lan,Yu;Shu,Yuelong
EPI628238	PB1	China	2014-Jan-26	EPI_ISL_192431	A/Jiangsu/09043/2014	WHO Chinese National Influenza Center	WHO Chinese National Influenza Center	Wang,Dayan;Gao,Rongbao;Yang,Lei;Zhou,Shumei;Li,Xiyan;Zhou,Jianfang;Zhu,Wenfei;Guo,Junfeng;Li,Xiaodan;Dong,Jie;Huang,Weijuan;Zhang,Ye;Dong,Libo;Zhao,Xiang;Lu,Jian;Lan,Yu;Shu,Yuelong
EPI628230	PB1	China	2014-Feb-05	EPI_ISL_192430	A/Jiangsu/09049/2014	WHO Chinese National Influenza Center	WHO Chinese National Influenza Center	Wang,Dayan;Gao,Rongbao;Yang,Lei;Zhou,Shumei;Li,Xiyan;Zhou,Jianfang;Zhu,Wenfei;Guo,Junfeng;Li,Xiaodan;Dong,Jie;Huang,Weijuan;Zhang,Ye;Dong,Libo;Zhao,Xiang;Lu,Jian;Lan,Yu;Shu,Yuelong
EPI628222	PB1	China	2014-Jan-26	EPI_ISL_192429	A/Fujian/6/2014	WHO Chinese National Influenza Center	WHO Chinese National Influenza Center	Wang,Dayan;Gao,Rongbao;Yang,Lei;Zhou,Shumei;Li,Xiyan;Zhou,Jianfang;Zhu,Wenfei;Guo,Junfeng;Li,Xiaodan;Dong,Jie;Huang,Weijuan;Zhang,Ye;Dong,Libo;Zhao,Xiang;Lu,Jian;Lan,Yu;Shu,Yuelong
EPI628214	PB1	China	2014-Jan-27	EPI_ISL_192428	A/Fujian/7/2014	WHO Chinese National Influenza Center	WHO Chinese National Influenza Center	Wang,Dayan;Gao,Rongbao;Yang,Lei;Zhou,Shumei;Li,Xiyan;Zhou,Jianfang;Zhu,Wenfei;Guo,Junfeng;Li,Xiaodan;Dong,Jie;Huang,Weijuan;Zhang,Ye;Dong,Libo;Zhao,Xiang;Lu,Jian;Lan,Yu;Shu,Yuelong
EPI628206	PB1	China	2014-Feb-03	EPI_ISL_192427	A/Fujian/8/2014	WHO Chinese National Influenza Center	WHO Chinese National Influenza Center	Wang,Dayan;Gao,Rongbao;Yang,Lei;Zhou,Shumei;Li,Xiyan;Zhou,Jianfang;Zhu,Wenfei;Guo,Junfeng;Li,Xiaodan;Dong,Jie;Huang,Weijuan;Zhang,Ye;Dong,Libo;Zhao,Xiang;Lu,Jian;Lan,Yu;Shu,Yuelong
EPI628198	PB1	China	2014-Jan-13	EPI_ISL_192426	A/Fujian/9/2014	WHO Chinese National Influenza Center	WHO Chinese National Influenza Center	Wang,Dayan;Gao,Rongbao;Yang,Lei;Zhou,Shumei;Li,Xiyan;Zhou,Jianfang;Zhu,Wenfei;Guo,Junfeng;Li,Xiaodan;Dong,Jie;Huang,Weijuan;Zhang,Ye;Dong,Libo;Zhao,Xiang;Lu,Jian;Lan,Yu;Shu,Yuelong
EPI628190	PB1	China	2014-Jan-07	EPI_ISL_192425	A/Jiangsu/09389/2014	WHO Chinese National Influenza Center	WHO Chinese National Influenza Center	Wang,Dayan;Gao,Rongbao;Yang,Lei;Zhou,Shumei;Li,Xiyan;Zhou,Jianfang;Zhu,Wenfei;Guo,Junfeng;Li,Xiaodan;Dong,Jie;Huang,Weijuan;Zhang,Ye;Dong,Libo;Zhao,Xiang;Lu,Jian;Lan,Yu;Shu,Yuelong
EPI628182	PB1	China	2014-Feb-05	EPI_ISL_192424	A/Hunan/09193/2014	WHO Chinese National Influenza Center	WHO Chinese National Influenza Center	Wang,Dayan;Gao,Rongbao;Yang,Lei;Zhou,Shumei;Li,Xiyan;Zhou,Jianfang;Zhu,Wenfei;Guo,Junfeng;Li,Xiaodan;Dong,Jie;Huang,Weijuan;Zhang,Ye;Dong,Libo;Zhao,Xiang;Lu,Jian;Lan,Yu;Shu,Yuelong
EPI628174	PB1	China	2014-Jan-26	EPI_ISL_192423	A/Fujian/11/2014	WHO Chinese National Influenza Center	WHO Chinese National Influenza Center	Wang,Dayan;Gao,Rongbao;Yang,Lei;Zhou,Shumei;Li,Xiyan;Zhou,Jianfang;Zhu,Wenfei;Guo,Junfeng;Li,Xiaodan;Dong,Jie;Huang,Weijuan;Zhang,Ye;Dong,Libo;Zhao,Xiang;Lu,Jian;Lan,Yu;Shu,Yuelong
EPI628166	PB1	China	2014-Jan-31	EPI_ISL_192422	A/Fujian/12/2014	WHO Chinese National Influenza Center	WHO Chinese National Influenza Center	Wang,Dayan;Gao,Rongbao;Yang,Lei;Zhou,Shumei;Li,Xiyan;Zhou,Jianfang;Zhu,Wenfei;Guo,Junfeng;Li,Xiaodan;Dong,Jie;Huang,Weijuan;Zhang,Ye;Dong,Libo;Zhao,Xiang;Lu,Jian;Lan,Yu;Shu,Yuelong
EPI628158	PB1	China	2014-Feb-02	EPI_ISL_192421	A/Fujian/13/2014	WHO Chinese National Influenza Center	WHO Chinese National Influenza Center	Wang,Dayan;Gao,Rongbao;Yang,Lei;Zhou,Shumei;Li,Xiyan;Zhou,Jianfang;Zhu,Wenfei;Guo,Junfeng;Li,Xiaodan;Dong,Jie;Huang,Weijuan;Zhang,Ye;Dong,Libo;Zhao,Xiang;Lu,Jian;Lan,Yu;Shu,Yuelong
EPI628150	PB1	China	2014-Feb-05	EPI_ISL_192420	A/Fujian/14/2014	WHO Chinese National Influenza Center	WHO Chinese National Influenza Center	Wang,Dayan;Gao,Rongbao;Yang,Lei;Zhou,Shumei;Li,Xiyan;Zhou,Jianfang;Zhu,Wenfei;Guo,Junfeng;Li,Xiaodan;Dong,Jie;Huang,Weijuan;Zhang,Ye;Dong,Libo;Zhao,Xiang;Lu,Jian;Lan,Yu;Shu,Yuelong
EPI628142	PB1	China	2014-Feb-17	EPI_ISL_192419	A/Hunan/12173/2014	WHO Chinese National Influenza Center	WHO Chinese National Influenza Center	Wang,Dayan;Gao,Rongbao;Yang,Lei;Zhou,Shumei;Li,Xiyan;Zhou,Jianfang;Zhu,Wenfei;Guo,Junfeng;Li,Xiaodan;Dong,Jie;Huang,Weijuan;Zhang,Ye;Dong,Libo;Zhao,Xiang;Lu,Jian;Lan,Yu;Shu,Yuelong
EPI628134	PB1	China	2014-Feb-16	EPI_ISL_192418	A/Hunan/12172/2014	WHO Chinese National Influenza Center	WHO Chinese National Influenza Center	Wang,Dayan;Gao,Rongbao;Yang,Lei;Zhou,Shumei;Li,Xiyan;Zhou,Jianfang;Zhu,Wenfei;Guo,Junfeng;Li,Xiaodan;Dong,Jie;Huang,Weijuan;Zhang,Ye;Dong,Libo;Zhao,Xiang;Lu,Jian;Lan,Yu;Shu,Yuelong
EPI628126	PB1	China	2014-Jan-12	EPI_ISL_192417	A/Guangdong/0031/2014	WHO Chinese National Influenza Center	WHO Chinese National Influenza Center	Wang,Dayan;Gao,Rongbao;Yang,Lei;Zhou,Shumei;Li,Xiyan;Zhou,Jianfang;Zhu,Wenfei;Guo,Junfeng;Li,Xiaodan;Dong,Jie;Huang,Weijuan;Zhang,Ye;Dong,Libo;Zhao,Xiang;Lu,Jian;Lan,Yu;Shu,Yuelong
EPI628118	PB1	China	2014-Jan-09	EPI_ISL_192416	A/Guangdong/0029/2014	WHO Chinese National Influenza Center	WHO Chinese National Influenza Center	Wang,Dayan;Gao,Rongbao;Yang,Lei;Zhou,Shumei;Li,Xiyan;Zhou,Jianfang;Zhu,Wenfei;Guo,Junfeng;Li,Xiaodan;Dong,Jie;Huang,Weijuan;Zhang,Ye;Dong,Libo;Zhao,Xiang;Lu,Jian;Lan,Yu;Shu,Yuelong
EPI628110	PB1	China	2014-Jan-11	EPI_ISL_192415	A/Guangdong/0026/2014	WHO Chinese National Influenza Center	WHO Chinese National Influenza Center	Wang,Dayan;Gao,Rongbao;Yang,Lei;Zhou,Shumei;Li,Xiyan;Zhou,Jianfang;Zhu,Wenfei;Guo,Junfeng;Li,Xiaodan;Dong,Jie;Huang,Weijuan;Zhang,Ye;Dong,Libo;Zhao,Xiang;Lu,Jian;Lan,Yu;Shu,Yuelong
EPI628102	PB1	China	2014-Jan-08	EPI_ISL_192414	A/Guangdong/0019/2014	WHO Chinese National Influenza Center	WHO Chinese National Influenza Center	Wang,Dayan;Gao,Rongbao;Yang,Lei;Zhou,Shumei;Li,Xiyan;Zhou,Jianfang;Zhu,Wenfei;Guo,Junfeng;Li,Xiaodan;Dong,Jie;Huang,Weijuan;Zhang,Ye;Dong,Libo;Zhao,Xiang;Lu,Jian;Lan,Yu;Shu,Yuelong
EPI628094	PB1	China	2014-Jan-04	EPI_ISL_192413	A/Guangdong/0012/2014	WHO Chinese National Influenza Center	WHO Chinese National Influenza Center	Wang,Dayan;Gao,Rongbao;Yang,Lei;Zhou,Shumei;Li,Xiyan;Zhou,Jianfang;Zhu,Wenfei;Guo,Junfeng;Li,Xiaodan;Dong,Jie;Huang,Weijuan;Zhang,Ye;Dong,Libo;Zhao,Xiang;Lu,Jian;Lan,Yu;Shu,Yuelong
EPI628086	PB1	China	2014-Feb-06	EPI_ISL_192412	A/Beijing/09149/2014	WHO Chinese National Influenza Center	WHO Chinese National Influenza Center	Wang,Dayan;Gao,Rongbao;Yang,Lei;Zhou,Shumei;Li,Xiyan;Zhou,Jianfang;Zhu,Wenfei;Guo,Junfeng;Li,Xiaodan;Dong,Jie;Huang,Weijuan;Zhang,Ye;Dong,Libo;Zhao,Xiang;Lu,Jian;Lan,Yu;Shu,Yuelong
EPI628078	PB1	China	2014-Jan-24	EPI_ISL_192411	A/Fujian/5/2014	WHO Chinese National Influenza Center	WHO Chinese National Influenza Center	Wang,Dayan;Gao,Rongbao;Yang,Lei;Zhou,Shumei;Li,Xiyan;Zhou,Jianfang;Zhu,Wenfei;Guo,Junfeng;Li,Xiaodan;Dong,Jie;Huang,Weijuan;Zhang,Ye;Dong,Libo;Zhao,Xiang;Lu,Jian;Lan,Yu;Shu,Yuelong
EPI628070	PB1	China	2014-Feb-07	EPI_ISL_192410	A/Anhui/09188/2014	WHO Chinese National Influenza Center	WHO Chinese National Influenza Center	Wang,Dayan;Gao,Rongbao;Yang,Lei;Zhou,Shumei;Li,Xiyan;Zhou,Jianfang;Zhu,Wenfei;Guo,Junfeng;Li,Xiaodan;Dong,Jie;Huang,Weijuan;Zhang,Ye;Dong,Libo;Zhao,Xiang;Lu,Jian;Lan,Yu;Shu,Yuelong
EPI628062	PB1	China	2014-Feb-11	EPI_ISL_192409	A/Hunan/09191/2014	WHO Chinese National Influenza Center	WHO Chinese National Influenza Center	Wang,Dayan;Gao,Rongbao;Yang,Lei;Zhou,Shumei;Li,Xiyan;Zhou,Jianfang;Zhu,Wenfei;Guo,Junfeng;Li,Xiaodan;Dong,Jie;Huang,Weijuan;Zhang,Ye;Dong,Libo;Zhao,Xiang;Lu,Jian;Lan,Yu;Shu,Yuelong
EPI628054	PB1	China	2014-Feb-07	EPI_ISL_192408	A/Jiangsu/09387/2014	WHO Chinese National Influenza Center	WHO Chinese National Influenza Center	Wang,Dayan;Gao,Rongbao;Yang,Lei;Zhou,Shumei;Li,Xiyan;Zhou,Jianfang;Zhu,Wenfei;Guo,Junfeng;Li,Xiaodan;Dong,Jie;Huang,Weijuan;Zhang,Ye;Dong,Libo;Zhao,Xiang;Lu,Jian;Lan,Yu;Shu,Yuelong
EPI628046	PB1	China	2014-Feb-13	EPI_ISL_192407	A/Anhui/09212/2014	WHO Chinese National Influenza Center	WHO Chinese National Influenza Center	Wang,Dayan;Gao,Rongbao;Yang,Lei;Zhou,Shumei;Li,Xiyan;Zhou,Jianfang;Zhu,Wenfei;Guo,Junfeng;Li,Xiaodan;Dong,Jie;Huang,Weijuan;Zhang,Ye;Dong,Libo;Zhao,Xiang;Lu,Jian;Lan,Yu;Shu,Yuelong
EPI628038	PB1	China	2014-Feb-15	EPI_ISL_192406	A/Anhui/09214/2014	WHO Chinese National Influenza Center	WHO Chinese National Influenza Center	Wang,Dayan;Gao,Rongbao;Yang,Lei;Zhou,Shumei;Li,Xiyan;Zhou,Jianfang;Zhu,Wenfei;Guo,Junfeng;Li,Xiaodan;Dong,Jie;Huang,Weijuan;Zhang,Ye;Dong,Libo;Zhao,Xiang;Lu,Jian;Lan,Yu;Shu,Yuelong
EPI628030	PB1	China	2014-Feb-07	EPI_ISL_192405	A/Anhui/09186/2014	WHO Chinese National Influenza Center	WHO Chinese National Influenza Center	Wang,Dayan;Gao,Rongbao;Yang,Lei;Zhou,Shumei;Li,Xiyan;Zhou,Jianfang;Zhu,Wenfei;Guo,Junfeng;Li,Xiaodan;Dong,Jie;Huang,Weijuan;Zhang,Ye;Dong,Libo;Zhao,Xiang;Lu,Jian;Lan,Yu;Shu,Yuelong
EPI628014	PB1	China	2014-Jan-30	EPI_ISL_192403	A/Guangdong/0075/2014	WHO Chinese National Influenza Center	WHO Chinese National Influenza Center	Wang,Dayan;Gao,Rongbao;Yang,Lei;Zhou,Shumei;Li,Xiyan;Zhou,Jianfang;Zhu,Wenfei;Guo,Junfeng;Li,Xiaodan;Dong,Jie;Huang,Weijuan;Zhang,Ye;Dong,Libo;Zhao,Xiang;Lu,Jian;Lan,Yu;Shu,Yuelong
EPI628006	PB1	China	2014-Jan-20	EPI_ISL_192402	A/Guangdong/0048/2014	WHO Chinese National Influenza Center	WHO Chinese National Influenza Center	Wang,Dayan;Gao,Rongbao;Yang,Lei;Zhou,Shumei;Li,Xiyan;Zhou,Jianfang;Zhu,Wenfei;Guo,Junfeng;Li,Xiaodan;Dong,Jie;Huang,Weijuan;Zhang,Ye;Dong,Libo;Zhao,Xiang;Lu,Jian;Lan,Yu;Shu,Yuelong
EPI627998	PB1	China	2014-Jan-29	EPI_ISL_192401	A/Guangdong/0065/2014	WHO Chinese National Influenza Center	WHO Chinese National Influenza Center	Wang,Dayan;Gao,Rongbao;Yang,Lei;Zhou,Shumei;Li,Xiyan;Zhou,Jianfang;Zhu,Wenfei;Guo,Junfeng;Li,Xiaodan;Dong,Jie;Huang,Weijuan;Zhang,Ye;Dong,Libo;Zhao,Xiang;Lu,Jian;Lan,Yu;Shu,Yuelong
EPI627990	PB1	China	2014-Jan-30	EPI_ISL_192400	A/Guangdong/0071/2014	WHO Chinese National Influenza Center	WHO Chinese National Influenza Center	Wang,Dayan;Gao,Rongbao;Yang,Lei;Zhou,Shumei;Li,Xiyan;Zhou,Jianfang;Zhu,Wenfei;Guo,Junfeng;Li,Xiaodan;Dong,Jie;Huang,Weijuan;Zhang,Ye;Dong,Libo;Zhao,Xiang;Lu,Jian;Lan,Yu;Shu,Yuelong
EPI627974	PB1	China	2014-Jan-31	EPI_ISL_192398	A/Guangdong/0081/2014	WHO Chinese National Influenza Center	WHO Chinese National Influenza Center	Wang,Dayan;Gao,Rongbao;Yang,Lei;Zhou,Shumei;Li,Xiyan;Zhou,Jianfang;Zhu,Wenfei;Guo,Junfeng;Li,Xiaodan;Dong,Jie;Huang,Weijuan;Zhang,Ye;Dong,Libo;Zhao,Xiang;Lu,Jian;Lan,Yu;Shu,Yuelong
EPI627966	PB1	China	2014-Jan-30	EPI_ISL_192397	A/Guangdong/0074/2014	WHO Chinese National Influenza Center	WHO Chinese National Influenza Center	Wang,Dayan;Gao,Rongbao;Yang,Lei;Zhou,Shumei;Li,Xiyan;Zhou,Jianfang;Zhu,Wenfei;Guo,Junfeng;Li,Xiaodan;Dong,Jie;Huang,Weijuan;Zhang,Ye;Dong,Libo;Zhao,Xiang;Lu,Jian;Lan,Yu;Shu,Yuelong
EPI627950	PB1	China	2014-Jan-30	EPI_ISL_192395	A/Guangdong/0069/2014	WHO Chinese National Influenza Center	WHO Chinese National Influenza Center	Wang,Dayan;Gao,Rongbao;Yang,Lei;Zhou,Shumei;Li,Xiyan;Zhou,Jianfang;Zhu,Wenfei;Guo,Junfeng;Li,Xiaodan;Dong,Jie;Huang,Weijuan;Zhang,Ye;Dong,Libo;Zhao,Xiang;Lu,Jian;Lan,Yu;Shu,Yuelong
EPI627942	PB1	China	2014-Jan-29	EPI_ISL_192394	A/Guangdong/0066/2014	WHO Chinese National Influenza Center	WHO Chinese National Influenza Center	Wang,Dayan;Gao,Rongbao;Yang,Lei;Zhou,Shumei;Li,Xiyan;Zhou,Jianfang;Zhu,Wenfei;Guo,Junfeng;Li,Xiaodan;Dong,Jie;Huang,Weijuan;Zhang,Ye;Dong,Libo;Zhao,Xiang;Lu,Jian;Lan,Yu;Shu,Yuelong
EPI627934	PB1	China	2014-Jan-17	EPI_ISL_192393	A/Guangdong/0046/2014	WHO Chinese National Influenza Center	WHO Chinese National Influenza Center	Wang,Dayan;Gao,Rongbao;Yang,Lei;Zhou,Shumei;Li,Xiyan;Zhou,Jianfang;Zhu,Wenfei;Guo,Junfeng;Li,Xiaodan;Dong,Jie;Huang,Weijuan;Zhang,Ye;Dong,Libo;Zhao,Xiang;Lu,Jian;Lan,Yu;Shu,Yuelong
EPI627926	PB1	China	2014-Feb-26	EPI_ISL_192392	A/Fujian/15/2014	WHO Chinese National Influenza Center	WHO Chinese National Influenza Center	Wang,Dayan;Gao,Rongbao;Yang,Lei;Zhou,Shumei;Li,Xiyan;Zhou,Jianfang;Zhu,Wenfei;Guo,Junfeng;Li,Xiaodan;Dong,Jie;Huang,Weijuan;Zhang,Ye;Dong,Libo;Zhao,Xiang;Lu,Jian;Lan,Yu;Shu,Yuelong
EPI627918	PB1	China	2014-Jul-25	EPI_ISL_192391	A/Xinjiang/73030/2014	WHO Chinese National Influenza Center	WHO Chinese National Influenza Center	Wang,Dayan;Gao,Rongbao;Yang,Lei;Zhou,Shumei;Li,Xiyan;Zhou,Jianfang;Zhu,Wenfei;Guo,Junfeng;Li,Xiaodan;Dong,Jie;Huang,Weijuan;Zhang,Ye;Dong,Libo;Zhao,Xiang;Lu,Jian;Lan,Yu;Shu,Yuelong
EPI627862	PB1	China	2014-Mar-04	EPI_ISL_192384	A/Shandong/02/2014	WHO Chinese National Influenza Center	WHO Chinese National Influenza Center	Wang,Dayan;Gao,Rongbao;Yang,Lei;Zhou,Shumei;Li,Xiyan;Zhou,Jianfang;Zhu,Wenfei;Guo,Junfeng;Li,Xiaodan;Dong,Jie;Huang,Weijuan;Zhang,Ye;Dong,Libo;Zhao,Xiang;Lu,Jian;Lan,Yu;Shu,Yuelong
EPI627854	PB1	China	2014-Apr-19	EPI_ISL_192383	A/Hunan/26938/2014	WHO Chinese National Influenza Center	WHO Chinese National Influenza Center	Wang,Dayan;Gao,Rongbao;Yang,Lei;Zhou,Shumei;Li,Xiyan;Zhou,Jianfang;Zhu,Wenfei;Guo,Junfeng;Li,Xiaodan;Dong,Jie;Huang,Weijuan;Zhang,Ye;Dong,Libo;Zhao,Xiang;Lu,Jian;Lan,Yu;Shu,Yuelong
EPI627846	PB1	China	2014-Apr-19	EPI_ISL_192382	A/Hunan/26937/2014	WHO Chinese National Influenza Center	WHO Chinese National Influenza Center	Wang,Dayan;Gao,Rongbao;Yang,Lei;Zhou,Shumei;Li,Xiyan;Zhou,Jianfang;Zhu,Wenfei;Guo,Junfeng;Li,Xiaodan;Dong,Jie;Huang,Weijuan;Zhang,Ye;Dong,Libo;Zhao,Xiang;Lu,Jian;Lan,Yu;Shu,Yuelong
EPI627838	PB1	China	2014-Apr-21	EPI_ISL_192381	A/Jiangxi/27569/2014	WHO Chinese National Influenza Center	WHO Chinese National Influenza Center	Wang,Dayan;Gao,Rongbao;Yang,Lei;Zhou,Shumei;Li,Xiyan;Zhou,Jianfang;Zhu,Wenfei;Guo,Junfeng;Li,Xiaodan;Dong,Jie;Huang,Weijuan;Zhang,Ye;Dong,Libo;Zhao,Xiang;Lu,Jian;Lan,Yu;Shu,Yuelong
EPI627830	PB1	China	2014-Aug-15	EPI_ISL_192380	A/Xinjiang/75802/2014	WHO Chinese National Influenza Center	WHO Chinese National Influenza Center	Wang,Dayan;Gao,Rongbao;Yang,Lei;Zhou,Shumei;Li,Xiyan;Zhou,Jianfang;Zhu,Wenfei;Guo,Junfeng;Li,Xiaodan;Dong,Jie;Huang,Weijuan;Zhang,Ye;Dong,Libo;Zhao,Xiang;Lu,Jian;Lan,Yu;Shu,Yuelong
EPI627806	PB1	China	2014-May-22	EPI_ISL_192377	A/Shandong/01/2014	WHO Chinese National Influenza Center	WHO Chinese National Influenza Center	Wang,Dayan;Gao,Rongbao;Yang,Lei;Zhou,Shumei;Li,Xiyan;Zhou,Jianfang;Zhu,Wenfei;Guo,Junfeng;Li,Xiaodan;Dong,Jie;Huang,Weijuan;Zhang,Ye;Dong,Libo;Zhao,Xiang;Lu,Jian;Lan,Yu;Shu,Yuelong
EPI627798	PB1	China	2014-Feb-11	EPI_ISL_192376	A/Guangdong-Guangzhou/XN06839/2014	WHO Chinese National Influenza Center	WHO Chinese National Influenza Center	Wang,Dayan;Gao,Rongbao;Yang,Lei;Zhou,Shumei;Li,Xiyan;Zhou,Jianfang;Zhu,Wenfei;Guo,Junfeng;Li,Xiaodan;Dong,Jie;Huang,Weijuan;Zhang,Ye;Dong,Libo;Zhao,Xiang;Lu,Jian;Lan,Yu;Shu,Yuelong
EPI627790	PB1	China	2014-Jan-16	EPI_ISL_192375	A/Guangdong-Guangzhou/XN02933/2014	WHO Chinese National Influenza Center	WHO Chinese National Influenza Center	Wang,Dayan;Gao,Rongbao;Yang,Lei;Zhou,Shumei;Li,Xiyan;Zhou,Jianfang;Zhu,Wenfei;Guo,Junfeng;Li,Xiaodan;Dong,Jie;Huang,Weijuan;Zhang,Ye;Dong,Libo;Zhao,Xiang;Lu,Jian;Lan,Yu;Shu,Yuelong
EPI627782	PB1	China	2014-Jan-29	EPI_ISL_192374	A/Guangdong-Guangzhou/XN00175/2014	WHO Chinese National Influenza Center	WHO Chinese National Influenza Center	Wang,Dayan;Gao,Rongbao;Yang,Lei;Zhou,Shumei;Li,Xiyan;Zhou,Jianfang;Zhu,Wenfei;Guo,Junfeng;Li,Xiaodan;Dong,Jie;Huang,Weijuan;Zhang,Ye;Dong,Libo;Zhao,Xiang;Lu,Jian;Lan,Yu;Shu,Yuelong
EPI627775	PB1	China	2014-Jan-29	EPI_ISL_192373	A/Guangdong-Guangzhou/XN05586/2014	WHO Chinese National Influenza Center	WHO Chinese National Influenza Center	Wang,Dayan;Gao,Rongbao;Yang,Lei;Zhou,Shumei;Li,Xiyan;Zhou,Jianfang;Zhu,Wenfei;Guo,Junfeng;Li,Xiaodan;Dong,Jie;Huang,Weijuan;Zhang,Ye;Dong,Libo;Zhao,Xiang;Lu,Jian;Lan,Yu;Shu,Yuelong
EPI627767	PB1	China	2014-Feb-02	EPI_ISL_192372	A/Guangdong-Guangzhou/XN00298/2014	WHO Chinese National Influenza Center	WHO Chinese National Influenza Center	Wang,Dayan;Gao,Rongbao;Yang,Lei;Zhou,Shumei;Li,Xiyan;Zhou,Jianfang;Zhu,Wenfei;Guo,Junfeng;Li,Xiaodan;Dong,Jie;Huang,Weijuan;Zhang,Ye;Dong,Libo;Zhao,Xiang;Lu,Jian;Lan,Yu;Shu,Yuelong
EPI627759	PB1	China	2014-Feb-05	EPI_ISL_192371	A/Guangdong-Guangzhou/XN00429/2014	WHO Chinese National Influenza Center	WHO Chinese National Influenza Center	Wang,Dayan;Gao,Rongbao;Yang,Lei;Zhou,Shumei;Li,Xiyan;Zhou,Jianfang;Zhu,Wenfei;Guo,Junfeng;Li,Xiaodan;Dong,Jie;Huang,Weijuan;Zhang,Ye;Dong,Libo;Zhao,Xiang;Lu,Jian;Lan,Yu;Shu,Yuelong
EPI627751	PB1	China	2014-Feb-07	EPI_ISL_192370	A/Guangdong-Guangzhou/XN00457/2014	WHO Chinese National Influenza Center	WHO Chinese National Influenza Center	Wang,Dayan;Gao,Rongbao;Yang,Lei;Zhou,Shumei;Li,Xiyan;Zhou,Jianfang;Zhu,Wenfei;Guo,Junfeng;Li,Xiaodan;Dong,Jie;Huang,Weijuan;Zhang,Ye;Dong,Libo;Zhao,Xiang;Lu,Jian;Lan,Yu;Shu,Yuelong
EPI627743	PB1	China	2014-Jan-03	EPI_ISL_192369	A/Guangdong/0010/2014	WHO Chinese National Influenza Center	WHO Chinese National Influenza Center	Wang,Dayan;Gao,Rongbao;Yang,Lei;Zhou,Shumei;Li,Xiyan;Zhou,Jianfang;Zhu,Wenfei;Guo,Junfeng;Li,Xiaodan;Dong,Jie;Huang,Weijuan;Zhang,Ye;Dong,Libo;Zhao,Xiang;Lu,Jian;Lan,Yu;Shu,Yuelong
EPI627735	PB1	China	2014-Feb-10	EPI_ISL_192368	A/Guangdong-Guangzhou/XN06587/2014	WHO Chinese National Influenza Center	WHO Chinese National Influenza Center	Wang,Dayan;Gao,Rongbao;Yang,Lei;Zhou,Shumei;Li,Xiyan;Zhou,Jianfang;Zhu,Wenfei;Guo,Junfeng;Li,Xiaodan;Dong,Jie;Huang,Weijuan;Zhang,Ye;Dong,Libo;Zhao,Xiang;Lu,Jian;Lan,Yu;Shu,Yuelong
EPI627727	PB1	China	2014-Jan-10	EPI_ISL_192367	A/Guangdong/0024/2014	WHO Chinese National Influenza Center	WHO Chinese National Influenza Center	Wang,Dayan;Gao,Rongbao;Yang,Lei;Zhou,Shumei;Li,Xiyan;Zhou,Jianfang;Zhu,Wenfei;Guo,Junfeng;Li,Xiaodan;Dong,Jie;Huang,Weijuan;Zhang,Ye;Dong,Libo;Zhao,Xiang;Lu,Jian;Lan,Yu;Shu,Yuelong
EPI627719	PB1	China	2014-Feb-21	EPI_ISL_192366	A/Guangdong-Guangzhou/XN08664/2014	WHO Chinese National Influenza Center	WHO Chinese National Influenza Center	Wang,Dayan;Gao,Rongbao;Yang,Lei;Zhou,Shumei;Li,Xiyan;Zhou,Jianfang;Zhu,Wenfei;Guo,Junfeng;Li,Xiaodan;Dong,Jie;Huang,Weijuan;Zhang,Ye;Dong,Libo;Zhao,Xiang;Lu,Jian;Lan,Yu;Shu,Yuelong
EPI627711	PB1	China	2014-Feb-21	EPI_ISL_192365	A/Guangdong-Guangzhou/XN08747/2014	WHO Chinese National Influenza Center	WHO Chinese National Influenza Center	Wang,Dayan;Gao,Rongbao;Yang,Lei;Zhou,Shumei;Li,Xiyan;Zhou,Jianfang;Zhu,Wenfei;Guo,Junfeng;Li,Xiaodan;Dong,Jie;Huang,Weijuan;Zhang,Ye;Dong,Libo;Zhao,Xiang;Lu,Jian;Lan,Yu;Shu,Yuelong
EPI627703	PB1	China	2014-Feb-21	EPI_ISL_192364	A/Guangdong-Guangzhou/XN08763/2014	WHO Chinese National Influenza Center	WHO Chinese National Influenza Center	Wang,Dayan;Gao,Rongbao;Yang,Lei;Zhou,Shumei;Li,Xiyan;Zhou,Jianfang;Zhu,Wenfei;Guo,Junfeng;Li,Xiaodan;Dong,Jie;Huang,Weijuan;Zhang,Ye;Dong,Libo;Zhao,Xiang;Lu,Jian;Lan,Yu;Shu,Yuelong
EPI627695	PB1	China	2014-Mar-24	EPI_ISL_192363	A/Guangdong-Guangzhou/XN13392/2014	WHO Chinese National Influenza Center	WHO Chinese National Influenza Center	Wang,Dayan;Gao,Rongbao;Yang,Lei;Zhou,Shumei;Li,Xiyan;Zhou,Jianfang;Zhu,Wenfei;Guo,Junfeng;Li,Xiaodan;Dong,Jie;Huang,Weijuan;Zhang,Ye;Dong,Libo;Zhao,Xiang;Lu,Jian;Lan,Yu;Shu,Yuelong
EPI627687	PB1	China	2014-Apr-10	EPI_ISL_192362	A/Guangdong-Guangzhou/XN15122/2014	WHO Chinese National Influenza Center	WHO Chinese National Influenza Center	Wang,Dayan;Gao,Rongbao;Yang,Lei;Zhou,Shumei;Li,Xiyan;Zhou,Jianfang;Zhu,Wenfei;Guo,Junfeng;Li,Xiaodan;Dong,Jie;Huang,Weijuan;Zhang,Ye;Dong,Libo;Zhao,Xiang;Lu,Jian;Lan,Yu;Shu,Yuelong
EPI627679	PB1	China	2014-Feb-05	EPI_ISL_192361	A/Guangdong-Guangzhou/XN00392/2014	WHO Chinese National Influenza Center	WHO Chinese National Influenza Center	Wang,Dayan;Gao,Rongbao;Yang,Lei;Zhou,Shumei;Li,Xiyan;Zhou,Jianfang;Zhu,Wenfei;Guo,Junfeng;Li,Xiaodan;Dong,Jie;Huang,Weijuan;Zhang,Ye;Dong,Libo;Zhao,Xiang;Lu,Jian;Lan,Yu;Shu,Yuelong
EPI627671	PB1	China	2014-Jan-15	EPI_ISL_192360	A/Guangdong-Guangzhou/XN02778/2014	WHO Chinese National Influenza Center	WHO Chinese National Influenza Center	Wang,Dayan;Gao,Rongbao;Yang,Lei;Zhou,Shumei;Li,Xiyan;Zhou,Jianfang;Zhu,Wenfei;Guo,Junfeng;Li,Xiaodan;Dong,Jie;Huang,Weijuan;Zhang,Ye;Dong,Libo;Zhao,Xiang;Lu,Jian;Lan,Yu;Shu,Yuelong
EPI627663	PB1	China	2014-Feb-10	EPI_ISL_192359	A/Guangdong-Guangzhou/XN00509/2014	WHO Chinese National Influenza Center	WHO Chinese National Influenza Center	Wang,Dayan;Gao,Rongbao;Yang,Lei;Zhou,Shumei;Li,Xiyan;Zhou,Jianfang;Zhu,Wenfei;Guo,Junfeng;Li,Xiaodan;Dong,Jie;Huang,Weijuan;Zhang,Ye;Dong,Libo;Zhao,Xiang;Lu,Jian;Lan,Yu;Shu,Yuelong
EPI627655	PB1	China	2014-Feb-16	EPI_ISL_192358	A/Guangdong-Guangzhou/XN00588/2014	WHO Chinese National Influenza Center	WHO Chinese National Influenza Center	Wang,Dayan;Gao,Rongbao;Yang,Lei;Zhou,Shumei;Li,Xiyan;Zhou,Jianfang;Zhu,Wenfei;Guo,Junfeng;Li,Xiaodan;Dong,Jie;Huang,Weijuan;Zhang,Ye;Dong,Libo;Zhao,Xiang;Lu,Jian;Lan,Yu;Shu,Yuelong
EPI627647	PB1	China	2014-Feb-19	EPI_ISL_192357	A/Guangdong-Guangzhou/XN08423/2014	WHO Chinese National Influenza Center	WHO Chinese National Influenza Center	Wang,Dayan;Gao,Rongbao;Yang,Lei;Zhou,Shumei;Li,Xiyan;Zhou,Jianfang;Zhu,Wenfei;Guo,Junfeng;Li,Xiaodan;Dong,Jie;Huang,Weijuan;Zhang,Ye;Dong,Libo;Zhao,Xiang;Lu,Jian;Lan,Yu;Shu,Yuelong
EPI627639	PB1	China	2014-Feb-24	EPI_ISL_192356	A/Guangdong-Guangzhou/XN09086/2014	WHO Chinese National Influenza Center	WHO Chinese National Influenza Center	Wang,Dayan;Gao,Rongbao;Yang,Lei;Zhou,Shumei;Li,Xiyan;Zhou,Jianfang;Zhu,Wenfei;Guo,Junfeng;Li,Xiaodan;Dong,Jie;Huang,Weijuan;Zhang,Ye;Dong,Libo;Zhao,Xiang;Lu,Jian;Lan,Yu;Shu,Yuelong
EPI627631	PB1	China	2014-Mar-31	EPI_ISL_192355	A/Guangdong-Guangzhou/XN14050/2014	WHO Chinese National Influenza Center	WHO Chinese National Influenza Center	Wang,Dayan;Gao,Rongbao;Yang,Lei;Zhou,Shumei;Li,Xiyan;Zhou,Jianfang;Zhu,Wenfei;Guo,Junfeng;Li,Xiaodan;Dong,Jie;Huang,Weijuan;Zhang,Ye;Dong,Libo;Zhao,Xiang;Lu,Jian;Lan,Yu;Shu,Yuelong
EPI627623	PB1	China	2014-Apr-04	EPI_ISL_192354	A/Guangdong-Guangzhou/XN14670/2014	WHO Chinese National Influenza Center	WHO Chinese National Influenza Center	Wang,Dayan;Gao,Rongbao;Yang,Lei;Zhou,Shumei;Li,Xiyan;Zhou,Jianfang;Zhu,Wenfei;Guo,Junfeng;Li,Xiaodan;Dong,Jie;Huang,Weijuan;Zhang,Ye;Dong,Libo;Zhao,Xiang;Lu,Jian;Lan,Yu;Shu,Yuelong
EPI627599	PB1	China	2014-Feb-03	EPI_ISL_192351	A/Zhejiang/20/2014	WHO Chinese National Influenza Center	WHO Chinese National Influenza Center	Wang,Dayan;Gao,Rongbao;Yang,Lei;Zhou,Shumei;Li,Xiyan;Zhou,Jianfang;Zhu,Wenfei;Guo,Junfeng;Li,Xiaodan;Dong,Jie;Huang,Weijuan;Zhang,Ye;Dong,Libo;Zhao,Xiang;Lu,Jian;Lan,Yu;Shu,Yuelong
EPI627591	PB1	China	2014-Jan-27	EPI_ISL_192350	A/Zhejiang/13/2014	WHO Chinese National Influenza Center	WHO Chinese National Influenza Center	Wang,Dayan;Gao,Rongbao;Yang,Lei;Zhou,Shumei;Li,Xiyan;Zhou,Jianfang;Zhu,Wenfei;Guo,Junfeng;Li,Xiaodan;Dong,Jie;Huang,Weijuan;Zhang,Ye;Dong,Libo;Zhao,Xiang;Lu,Jian;Lan,Yu;Shu,Yuelong
EPI627583	PB1	China	2014-Jan-25	EPI_ISL_192349	A/Zhejiang/15/2014	WHO Chinese National Influenza Center	WHO Chinese National Influenza Center	Wang,Dayan;Gao,Rongbao;Yang,Lei;Zhou,Shumei;Li,Xiyan;Zhou,Jianfang;Zhu,Wenfei;Guo,Junfeng;Li,Xiaodan;Dong,Jie;Huang,Weijuan;Zhang,Ye;Dong,Libo;Zhao,Xiang;Lu,Jian;Lan,Yu;Shu,Yuelong
EPI627575	PB1	China	2014-Feb-03	EPI_ISL_192348	A/Zhejiang/16/2014	WHO Chinese National Influenza Center	WHO Chinese National Influenza Center	Wang,Dayan;Gao,Rongbao;Yang,Lei;Zhou,Shumei;Li,Xiyan;Zhou,Jianfang;Zhu,Wenfei;Guo,Junfeng;Li,Xiaodan;Dong,Jie;Huang,Weijuan;Zhang,Ye;Dong,Libo;Zhao,Xiang;Lu,Jian;Lan,Yu;Shu,Yuelong
EPI627567	PB1	China	2014-Jan-23	EPI_ISL_192347	A/Zhejiang/19/2014	WHO Chinese National Influenza Center	WHO Chinese National Influenza Center	Wang,Dayan;Gao,Rongbao;Yang,Lei;Zhou,Shumei;Li,Xiyan;Zhou,Jianfang;Zhu,Wenfei;Guo,Junfeng;Li,Xiaodan;Dong,Jie;Huang,Weijuan;Zhang,Ye;Dong,Libo;Zhao,Xiang;Lu,Jian;Lan,Yu;Shu,Yuelong
EPI627559	PB1	China	2014-Jan-14	EPI_ISL_192346	A/Zhejiang/14/2014	WHO Chinese National Influenza Center	WHO Chinese National Influenza Center	Wang,Dayan;Gao,Rongbao;Yang,Lei;Zhou,Shumei;Li,Xiyan;Zhou,Jianfang;Zhu,Wenfei;Guo,Junfeng;Li,Xiaodan;Dong,Jie;Huang,Weijuan;Zhang,Ye;Dong,Libo;Zhao,Xiang;Lu,Jian;Lan,Yu;Shu,Yuelong
EPI627551	PB1	China	2014-Feb-10	EPI_ISL_192345	A/Zhejiang/21/2014	WHO Chinese National Influenza Center	WHO Chinese National Influenza Center	Wang,Dayan;Gao,Rongbao;Yang,Lei;Zhou,Shumei;Li,Xiyan;Zhou,Jianfang;Zhu,Wenfei;Guo,Junfeng;Li,Xiaodan;Dong,Jie;Huang,Weijuan;Zhang,Ye;Dong,Libo;Zhao,Xiang;Lu,Jian;Lan,Yu;Shu,Yuelong
EPI627543	PB1	China	2014-Feb-08	EPI_ISL_192344	A/Zhejiang/22/2014	WHO Chinese National Influenza Center	WHO Chinese National Influenza Center	Wang,Dayan;Gao,Rongbao;Yang,Lei;Zhou,Shumei;Li,Xiyan;Zhou,Jianfang;Zhu,Wenfei;Guo,Junfeng;Li,Xiaodan;Dong,Jie;Huang,Weijuan;Zhang,Ye;Dong,Libo;Zhao,Xiang;Lu,Jian;Lan,Yu;Shu,Yuelong
[truncated: 9,295 more rows]
